# Supplementary material for: Longitudinal analysis of invariant natural killer T cell activation reveals a cMAF-associated transcriptional state of NKT10 cells
Source: eLife. 2022 Dec 2;11:e76586. doi: 10.7554/eLife.76586 (PMC9831610; doi:10.7554/eLife.76586)
Supplement: Figure 2—source data 1. [file elife-76586-fig2-data1.xlsx]

## Sheet: All
Subset	MTG	TMRM
NKT1	475	238
NKT1	416	331
NKT1	279	241
NKT1	430	278
NKT2	3575	6200
NKT2	3386	6002
NKT2	2391	6377
NKT2	3575	5544
NKT17	3107	10435
NKT17	2452	8281
NKT17	1680	6896
NKT17	2946	8600
