# Supplementary material for: Longitudinal analysis of invariant natural killer T cell activation reveals a cMAF-associated transcriptional state of NKT10 cells
Source: eLife. 2022 Dec 2;11:e76586. doi: 10.7554/eLife.76586 (PMC9831610; doi:10.7554/eLife.76586)
Supplement: Figure 2—source data 2. [file elife-76586-fig2-data2.xlsx]

## Sheet: Plot_Cytokines
Replicate	Stimulus	Value	Subset
R1	Unstimulated	0.51	NKT1 (IFNγ)
R2	Unstimulated	0.24	NKT1 (IFNγ)
R3	Unstimulated	0.35	NKT1 (IFNγ)
R4	Unstimulated	0.4	NKT1 (IFNγ)
R5	Unstimulated	0.75	NKT1 (IFNγ)
R1	PMA	54.9	NKT1 (IFNγ)
R2	PMA	63.1	NKT1 (IFNγ)
R3	PMA	46	NKT1 (IFNγ)
R4	PMA	52.9	NKT1 (IFNγ)
R5	PMA	76.2	NKT1 (IFNγ)
R1	Oligomycin	40.2	NKT1 (IFNγ)
R2	Oligomycin	37.8	NKT1 (IFNγ)
R3	Oligomycin	29	NKT1 (IFNγ)
R4	Oligomycin	29.6	NKT1 (IFNγ)
R5	Oligomycin	41.3	NKT1 (IFNγ)
R1	Unstimulated	0	NKT2 (IL-4)
R2	Unstimulated	0.35	NKT2 (IL-4)
R3	Unstimulated	0.37	NKT2 (IL-4)
R4	Unstimulated	0.27	NKT2 (IL-4)
R5	Unstimulated	0.17	NKT2 (IL-4)
R1	PMA	54.5	NKT2 (IL-4)
R2	PMA	64.6	NKT2 (IL-4)
R3	PMA	53.4	NKT2 (IL-4)
R4	PMA	57.7	NKT2 (IL-4)
R5	PMA	71.4	NKT2 (IL-4)
R1	Oligomycin	2.5	NKT2 (IL-4)
R2	Oligomycin	4.03	NKT2 (IL-4)
R3	Oligomycin	2.81	NKT2 (IL-4)
R4	Oligomycin	1.01	NKT2 (IL-4)
R5	Oligomycin	2.5	NKT2 (IL-4)
R1	Unstimulated	0.22	NKT2 (IL-13)
R2	Unstimulated	0.59	NKT2 (IL-13)
R3	Unstimulated	0.37	NKT2 (IL-13)
R4	Unstimulated	0.14	NKT2 (IL-13)
R5	Unstimulated	0.85	NKT2 (IL-13)
R1	PMA	24.1	NKT2 (IL-13)
R2	PMA	38.4	NKT2 (IL-13)
R3	PMA	21.1	NKT2 (IL-13)
R4	PMA	17.5	NKT2 (IL-13)
R5	PMA	35.9	NKT2 (IL-13)
R1	Oligomycin	1.25	NKT2 (IL-13)
R2	Oligomycin	2.82	NKT2 (IL-13)
R3	Oligomycin	1.03	NKT2 (IL-13)
R4	Oligomycin	0.38	NKT2 (IL-13)
R5	Oligomycin	1.16	NKT2 (IL-13)
R1	Unstimulated	2.69	NKT17 (IL-17A)
R2	Unstimulated	4.09	NKT17 (IL-17A)
R3	Unstimulated	4.13	NKT17 (IL-17A)
R4	Unstimulated	3.48	NKT17 (IL-17A)
R5	Unstimulated	2.19	NKT17 (IL-17A)
R1	PMA	61.5	NKT17 (IL-17A)
R2	PMA	80.7	NKT17 (IL-17A)
R3	PMA	49.4	NKT17 (IL-17A)
R4	PMA	66	NKT17 (IL-17A)
R5	PMA	70.2	NKT17 (IL-17A)
R1	Oligomycin	1.59	NKT17 (IL-17A)
R2	Oligomycin	3.55	NKT17 (IL-17A)
R3	Oligomycin	3.1	NKT17 (IL-17A)
R4	Oligomycin	2.03	NKT17 (IL-17A)
R5	Oligomycin	6	NKT17 (IL-17A)
