# Supplementary material for: Longitudinal analysis of invariant natural killer T cell activation reveals a cMAF-associated transcriptional state of NKT10 cells
Source: eLife. 2022 Dec 2;11:e76586. doi: 10.7554/eLife.76586 (PMC9831610; doi:10.7554/eLife.76586)
Supplement: Figure 3—source data 1. [file elife-76586-fig3-data1.xlsx]

## Sheet: gprofiler
Pathway	Tissue	negLog10_Adjusted_P_value
Ribosome	Spleen	17.362
NK cell mediated cytotoxicity	Adipose	8.20591
Endocytosis	Adipose	7.02202
Regulation of actin cytoskeleton	Adipose	5.0782
Apoptosis	Adipose	3.38878
FcγR-mediated phagocytosis	Adipose	3.22763
Focal adhesion	Adipose	3.04414
Leukocyte transendothelial migration	Adipose	2.87002
Sphingolipid signaling pathway	Adipose	2.59609
Neurotrophin signaling pathway	Adipose	2.06315
HIF-1 signaling pathway	Adipose	1.98482
Cellular senescence	Adipose	1.7582
FcεRI signaling pathway	Adipose	1.69408
Chemokine signaling pathway	Adipose	1.60977
T cell receptor signaling pathway	Adipose	1.43106
