# Supplementary material for: Longitudinal analysis of invariant natural killer T cell activation reveals a cMAF-associated transcriptional state of NKT10 cells
Source: eLife. 2022 Dec 2;11:e76586. doi: 10.7554/eLife.76586 (PMC9831610; doi:10.7554/eLife.76586)
Supplement: Figure 5—source data 1. [file elife-76586-fig5-data1.xlsx]

## Sheet: Sheet1
Group	Percent_KLRG1_GZMA_pos
UT	1.04
UT	0.38
UT	1.75
UT	1.45
UT	1.23
Treat	12.5
Treat	19.1
Treat	20.1
Treat	19.7
Treat	18.6
