# Supplementary material for: Longitudinal analysis of invariant natural killer T cell activation reveals a cMAF-associated transcriptional state of NKT10 cells
Source: eLife. 2022 Dec 2;11:e76586. doi: 10.7554/eLife.76586 (PMC9831610; doi:10.7554/eLife.76586)
Supplement: Figure 5—source data 2. [file elife-76586-fig5-data2.xlsx]

## Sheet: IL10_cMAF_pos_vs_neg
Group	Condition	Pair	Percent_pos_IL10
Mafneg	4WK	1	2.16
Mafneg	4WK	2	1.54
Mafneg	4WK	3	1.28
Mafneg	4WK	4	0.27
Mafneg	4WK	5	0
Mafpos	4WK	1	5.26
Mafpos	4WK	2	2.27
Mafpos	4WK	3	1.47
Mafpos	4WK	4	3.23
Mafpos	4WK	5	5
