# Supplementary material for: Longitudinal analysis of invariant natural killer T cell activation reveals a cMAF-associated transcriptional state of NKT10 cells
Source: eLife. 2022 Dec 2;11:e76586. doi: 10.7554/eLife.76586 (PMC9831610; doi:10.7554/eLife.76586)
Supplement: Figure 6—source data 1. [file elife-76586-fig6-data1.xlsx]

## Sheet: Sheet1
Treat	Organ	KLRG1	cMAF
UT	Spleen	0.8	1.71
UT	Spleen	0.57	2.34
UT	Spleen	0.64	1.01
UT	Spleen	0.45	2.2
UT	Spleen	0.52	1.9
aGC4	Spleen	5.91	27.9
aGC4	Spleen	5.57	35.7
aGC4	Spleen	6.4	22.7
aGC4	Spleen	7.44	26.4
aGC4	Spleen	4.48	31.9
UT	iLN	2.11	4.93
UT	iLN	1.01	4.02
UT	iLN	3.97	3.17
UT	iLN	3	1.5
UT	iLN	1.96	1.31
aGC4	iLN	9.68	9.68
aGC4	iLN	6.45	6.45
aGC4	iLN	3.3	16.5
aGC4	iLN	7.25	6.28
aGC4	iLN	2.86	20
UT	Liver	1.07	1.62
UT	Liver	2.14	1.23
UT	Liver	2.7	1.33
UT	Liver	3.09	2.68
UT	Liver	0.71	0.73
aGC4	Liver	12	5.95
aGC4	Liver	5.23	6.33
aGC4	Liver	8.08	6.4
aGC4	Liver	7.7	6.18
UT	Adipose	10.8	8.11
UT	Adipose	12.6	5.3
UT	Adipose	19.9	3.01
UT	Adipose	9.94	3.31
UT	Adipose	22.5	3.52
aGC4	Adipose	28.5	8.82
aGC4	Adipose	23.1	8.56
aGC4	Adipose	20.9	10.8
aGC4	Adipose	19.1	10.1
aGC4	Adipose	27.5	8.67
UT	Lung	24.7	3.55
UT	Lung	6.8	2.82
UT	Lung	6.52	2.47
UT	Lung	5.3	4.43
UT	Lung	16.6	2.85
aGC4	Lung	46.5	7.34
aGC4	Lung	51.2	3.81
aGC4	Lung	52.4	3.59
aGC4	Lung	51	4.47
aGC4	Lung	45.6	3.87
