# Supplementary material for: Longitudinal analysis of invariant natural killer T cell activation reveals a cMAF-associated transcriptional state of NKT10 cells
Source: eLife. 2022 Dec 2;11:e76586. doi: 10.7554/eLife.76586 (PMC9831610; doi:10.7554/eLife.76586)
Supplement: Figure 7—source data 1. [file elife-76586-fig7-data1.xlsx]

## Sheet: Sheet 1
TF	c1	c2	c3	c4	c5	c6	c7	c8	c9	c10	Average
Hif1a	0.130946	0.131462	0.131717	0.132802	0.131773	0.13341	0.131567	0.131705	0.131019	0.132369	0.131877
Hivep3	0.116442	0.116403	0.117179	0.115393	0.117628	0.117806	0.116753	0.1154	0.118172	0.11716	0.116834
Irf8	0.219076	0.216456	0.21865	0.218902	0.218192	0.219053	0.219609	0.22153	0.219516	0.217308	0.218829
Maf	0.281759	0.285302	0.281161	0.282639	0.28202	0.280006	0.279959	0.279793	0.280118	0.281038	0.28138
Pou2f2	0.101704	0.101074	0.102684	0.100423	0.101299	0.101377	0.102516	0.101612	0.101777	0.102123	0.101659
Zeb2	0.0938334	0.0936011	0.0926036	0.094551	0.0935695	0.093279	0.0937562	0.0939876	0.0935083	0.0940993	0.0936789
Nfil3	0.0562388	0.0557004	0.0560048	0.0552896	0.0555183	0.0550699	0.0558398	0.0559727	0.0558892	0.0559036	0.0557427
