# Supplementary material for: Longitudinal analysis of invariant natural killer T cell activation reveals a cMAF-associated transcriptional state of NKT10 cells
Source: eLife. 2022 Dec 2;11:e76586. doi: 10.7554/eLife.76586 (PMC9831610; doi:10.7554/eLife.76586)
Supplement: Figure 7—source data 2. [file elife-76586-fig7-data2.xlsx]

## Sheet: Sheet1
Group	Percent_NKTFH
UT	0.38
UT	0.38
UT	0.19
UT	0.47
UT	0.3
Treated	5.79
Treated	10.7
Treated	3.93
Treated	4.77
Treated	5.69
Treated_cMAFpos	7.1
Treated_cMAFpos	12.3
Treated_cMAFpos	5.43
Treated_cMAFpos	6.19
Treated_cMAFpos	6.66
