# Supplementary material for: Longitudinal analysis of invariant natural killer T cell activation reveals a cMAF-associated transcriptional state of NKT10 cells
Source: eLife journal article supplement (doi:10.7554/elife.76586), 2022-12-02

Figure 6-figure supplement 1

A. Resting splenic iNKT cell heterogeneity is clearly defined by spatial separation and graph-based clustering

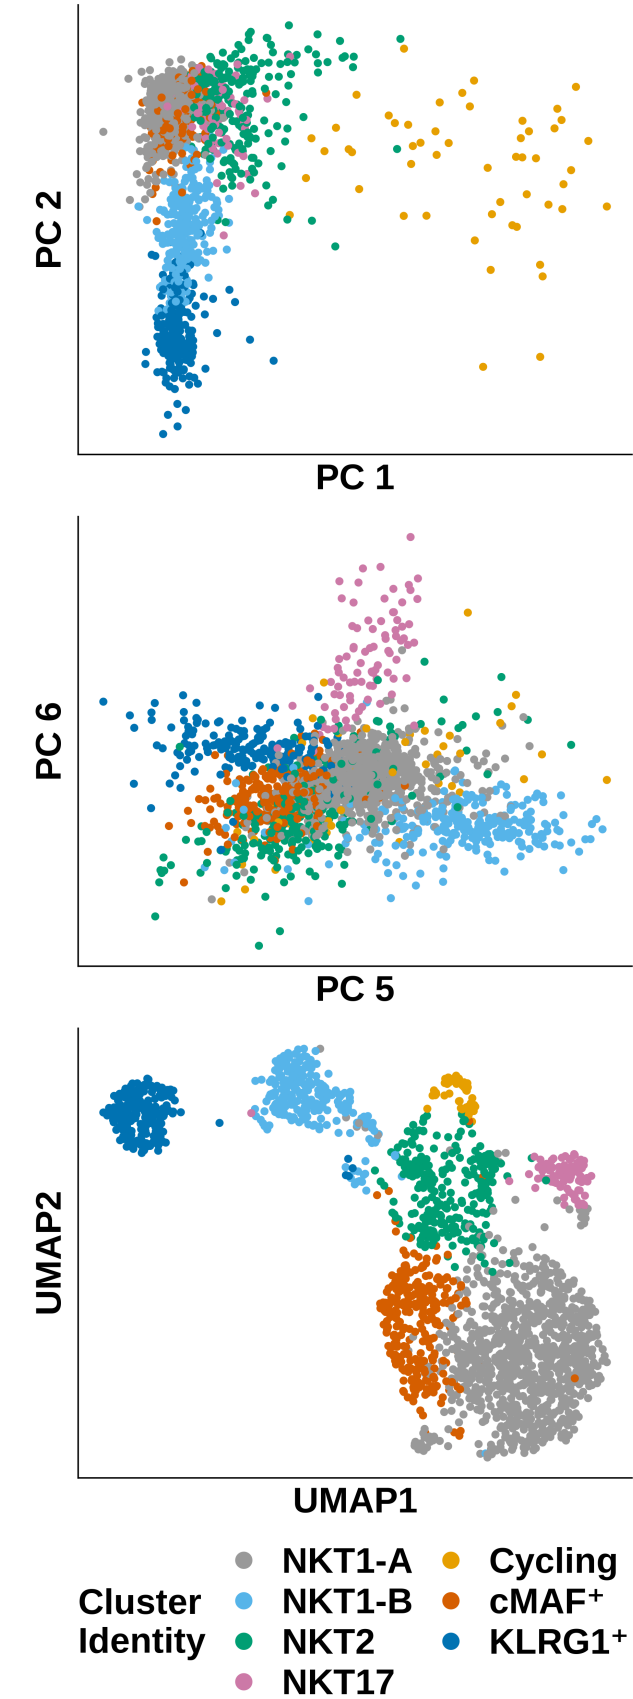

B. Gene expression in resting iNKT cells at 4WK post- $\alpha$ GalCer

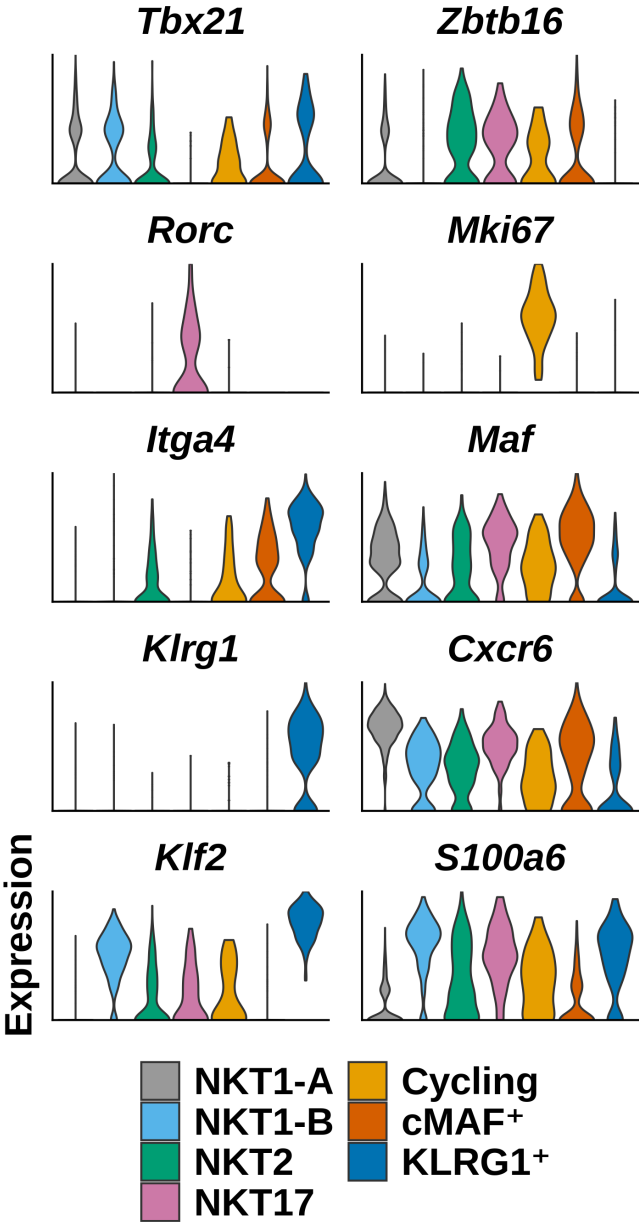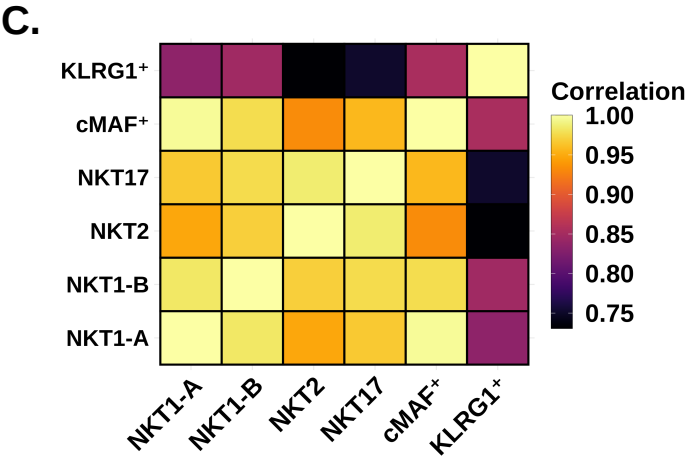

Supplement: supp [file elife-76586-supp-v1.zip]
