# Supplementary material for: Longitudinal analysis of invariant natural killer T cell activation reveals a cMAF-associated transcriptional state of NKT10 cells
Source: eLife journal article supplement (doi:10.7554/elife.76586), 2022-12-02

Figure 4-figure supplement 1

A. Subclustering of adipose cytokine<sup>pos</sup> cells  
(72 hours post- $\alpha$ GalCer; 1,539 cells)

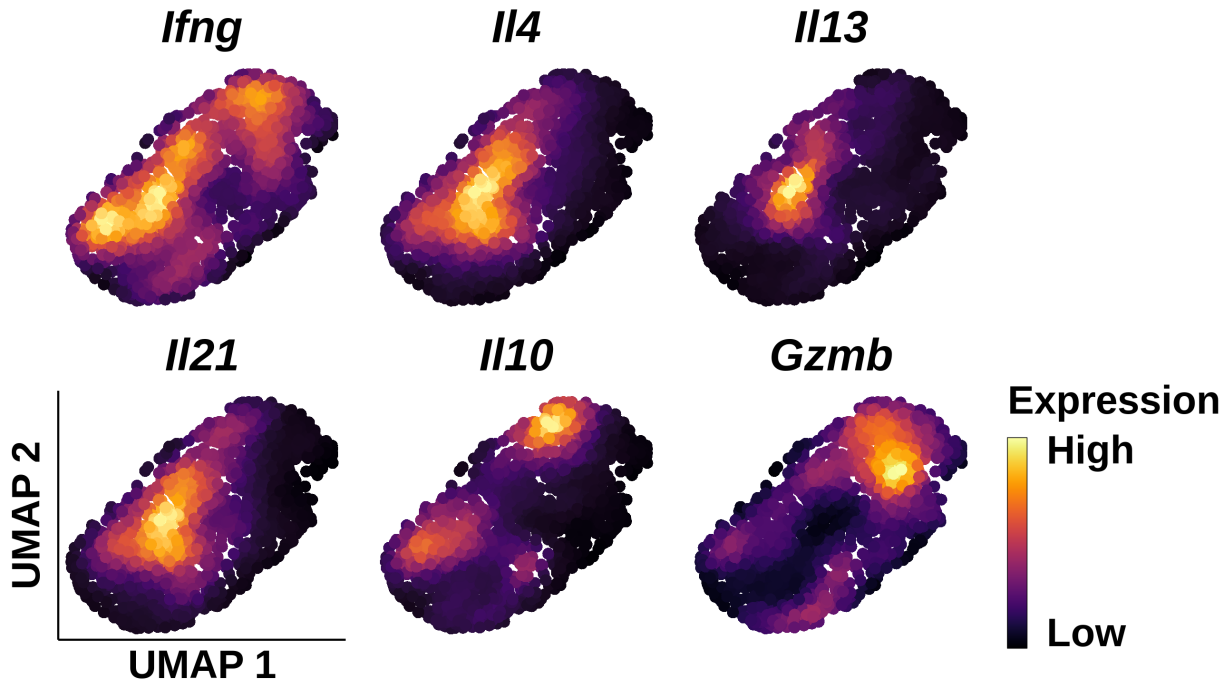

B. Adipose NKT10 Cells (833 cells)

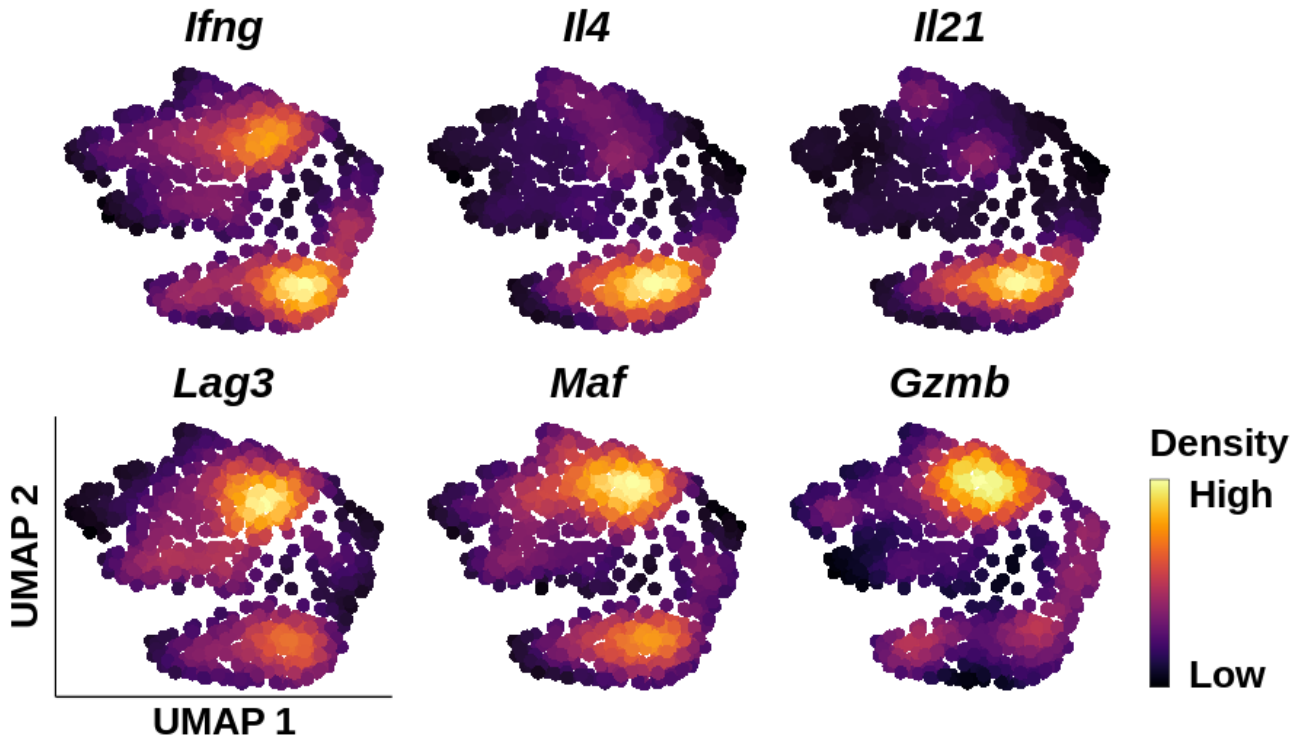

Supplement: supp [file elife-76586-supp-v1.zip]
