# Supplementary material for: Longitudinal analysis of invariant natural killer T cell activation reveals a cMAF-associated transcriptional state of NKT10 cells
Source: eLife journal article supplement (doi:10.7554/elife.76586), 2022-12-02

Figure 6-figure supplement 2

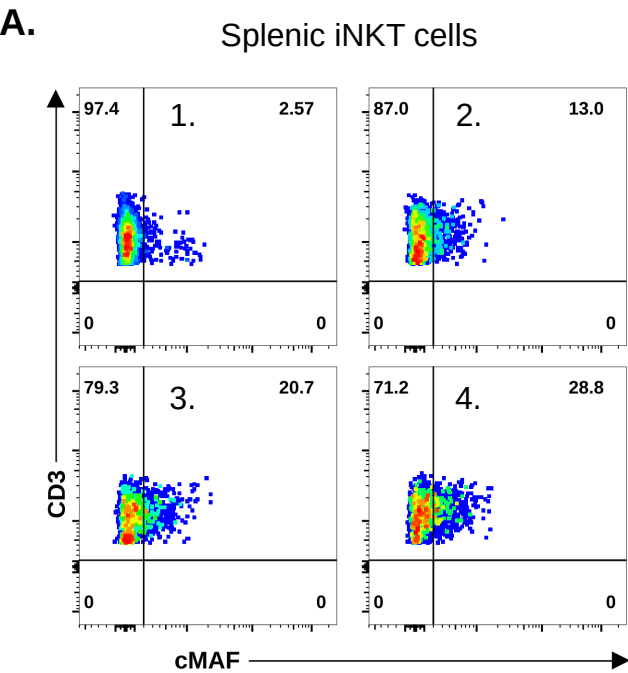

- 1. Steady State
- 2. 4 weeks post-1µg αGalCer
- 3. 4 weeks post-2.5µg αGalCer
- 4. 4 weeks post-5µg αGalCer

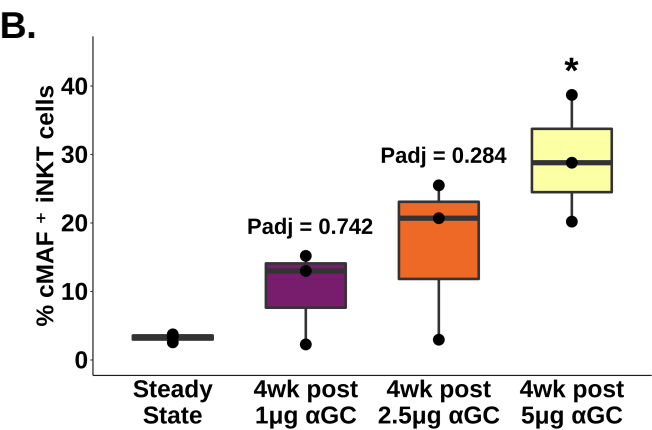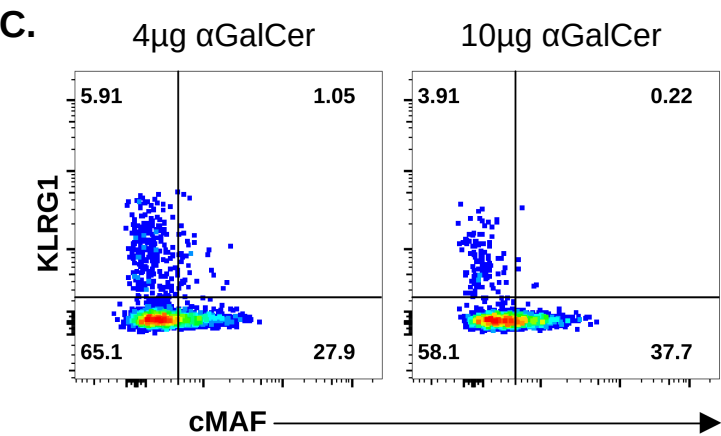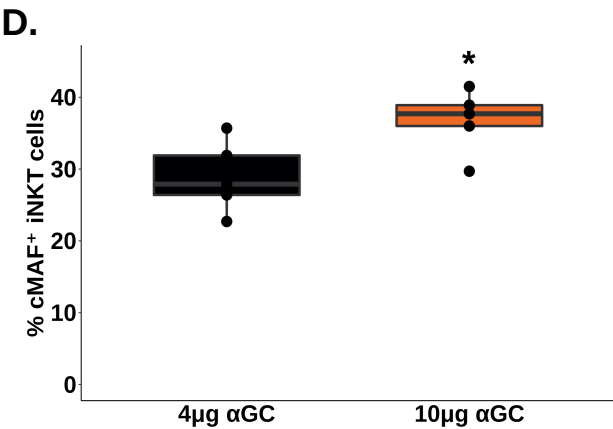

Supplement: supp [file elife-76586-supp-v1.zip]
