# Supplementary material for: Longitudinal analysis of invariant natural killer T cell activation reveals a cMAF-associated transcriptional state of NKT10 cells
Source: eLife journal article supplement (doi:10.7554/elife.76586), 2022-12-02

Figure 6-figure supplement 3

A. Splenic iNKT cells      Adipose iNKT cells

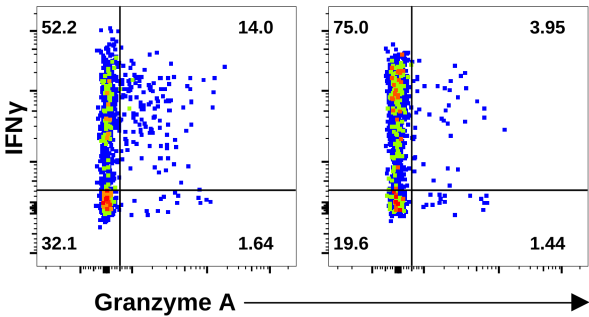

B.

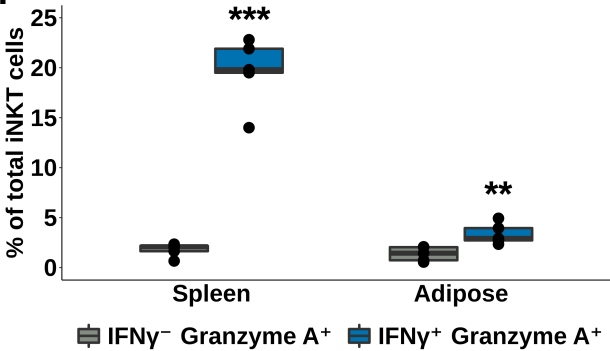

C. Splenic iNKT cells      Adipose iNKT cells

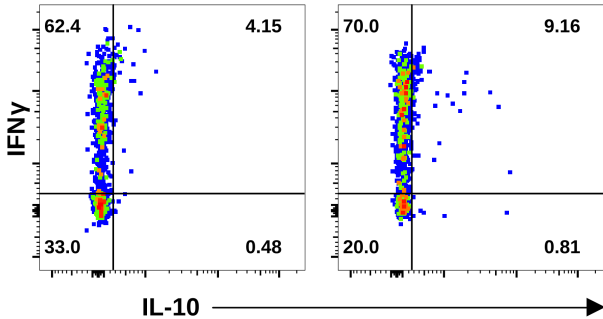

D.

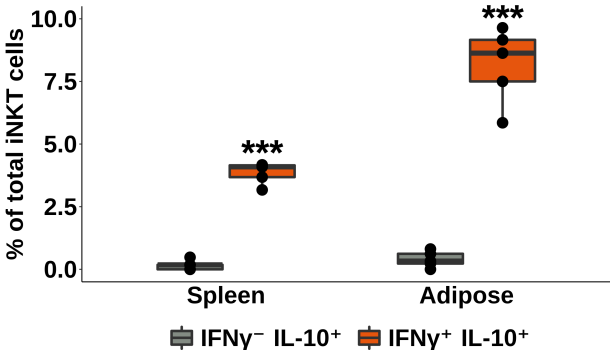

Supplement: supp [file elife-76586-supp-v1.zip]
