# Supplementary material for: Longitudinal analysis of invariant natural killer T cell activation reveals a cMAF-associated transcriptional state of NKT10 cells
Source: eLife journal article supplement (doi:10.7554/elife.76586), 2022-12-02

Figure 2-figure supplement 2

A. Merged steady state and 4 hour post- $\alpha$ GalCer data by subset

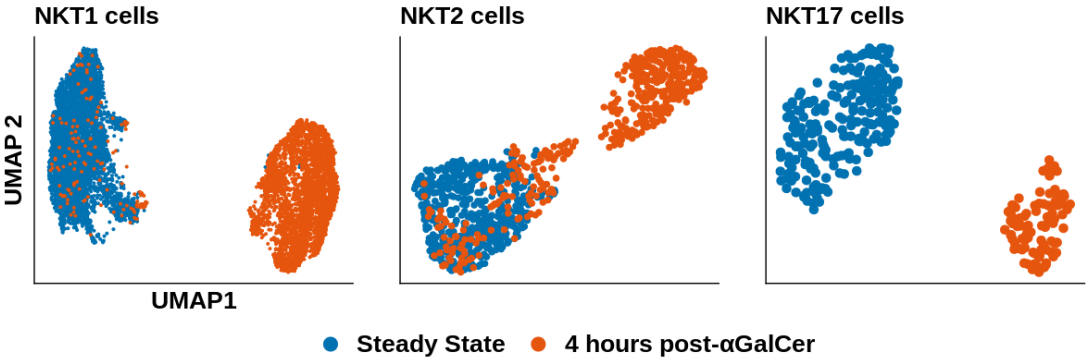

B. Activation-based reclustering of iNKT cells within subset

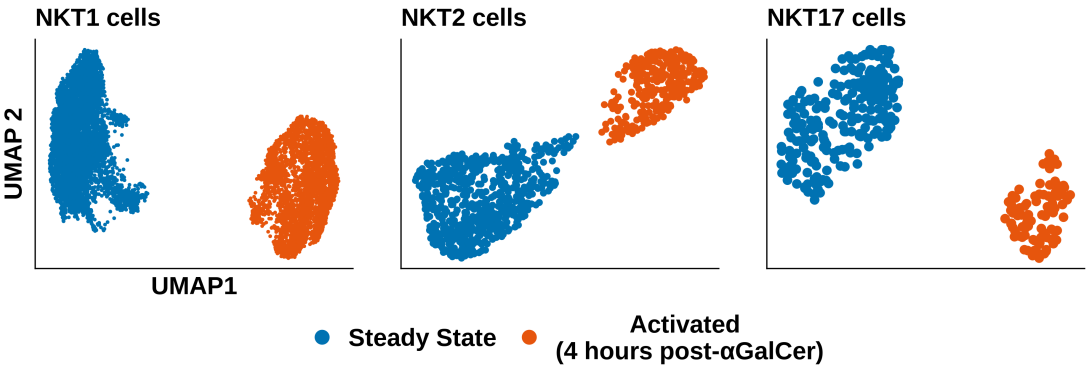

C. iNKT Cell Activation (gene module scoring)

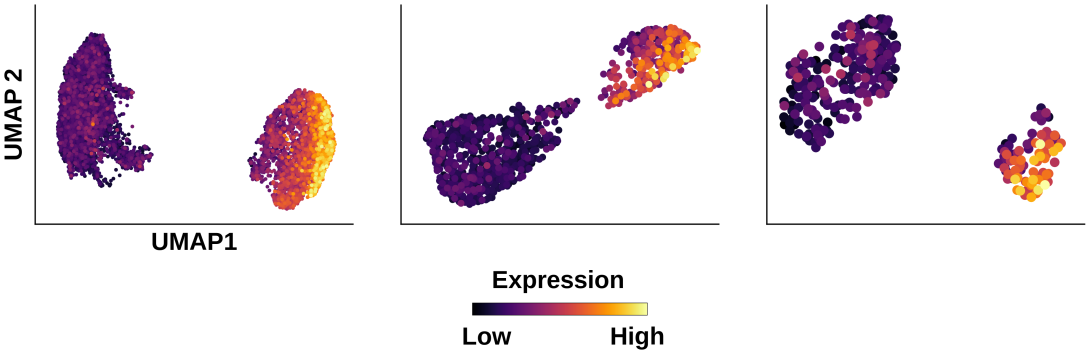

D. Expression of flagship iNKT cell subset cytokines

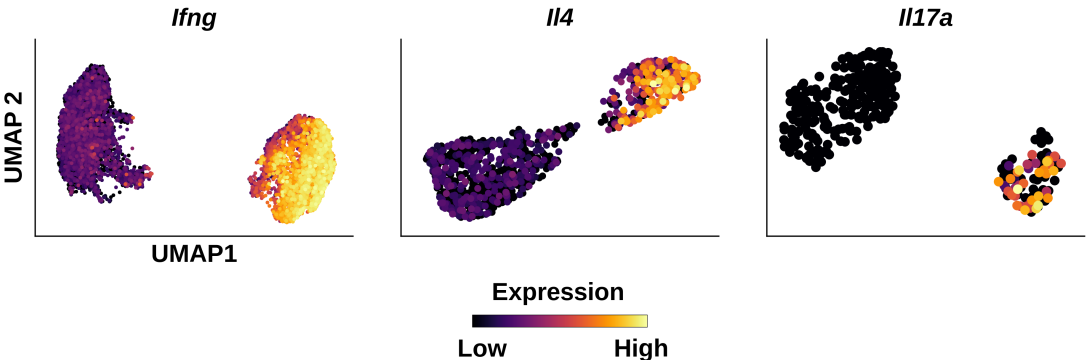

Supplement: supp [file elife-76586-supp-v1.zip]
