# Supplementary material for: Longitudinal analysis of invariant natural killer T cell activation reveals a cMAF-associated transcriptional state of NKT10 cells
Source: eLife. 2022 Dec 2;11:e76586. doi: 10.7554/eLife.76586 (PMC9831610; doi:10.7554/eLife.76586)
Supplement: Supplementary file 1. [file elife-76586-supp1.xlsx]

## Sheet: Sheet1
Steady State Splenic iNKT cells							4 hour post-⍺GalCer Splenic iNKT cells							72 hour post-⍺GalCer Splenic iNKT cells
Gene	P_Value	Log2(Fold Change)	pct.1	pct.2	Adjusted_P_Value		Gene	P_Value	Log2(Fold Change)	pct.1	pct.2	Adjusted_P_Value		Gene	P_Value	Log2(Fold Change)	pct.1	pct.2	Adjusted_P_Value
Il7r	0	2.2745	0.842	0.369	0		Ccl4	0	7.24601	0.777	0.216	0		Hist1h1b	0	3.85393	0.586	0.003	0
Ckb	0	1.71018	0.701	0.328	0		Ifng	0	7.09783	0.93	0.476	0		Ifi27l2a	0	3.33703	0.995	0.383	0
Malat1	0	1.63659	1	1	0		Il4	0	6.67382	0.862	0.253	0		Lgals1	0	3.31082	0.994	0.2	0
Klrb1c	0	1.5699	0.484	0.092	0		Il2	0	5.5859	0.457	0.083	0		Vim	0	3.28409	0.877	0.049	0
Mbnl1	0	1.56978	0.971	0.853	0		Il13	0	5.3028	0.66	0.041	0		Hmgb2	0	3.2144	0.997	0.579	0
Dtx1	0	1.52824	0.607	0.281	0		Ccl3	0	5.10847	0.39	0.038	0		Stmn1	0	2.97537	0.782	0.023	0
Rsrp1	0	1.47881	0.92	0.789	0		Ccl1	0	5.09078	0.32	0.031	0		Crip1	0	2.8409	0.991	0.297	0
Txk	0	1.4576	0.681	0.418	0		Xcl1	0	4.59885	0.831	0.301	0		S100a6	0	2.60949	0.941	0.213	0
Jun	0	1.42074	0.448	0.107	0		Csf2	0	3.78374	0.508	0.047	0		Itgb1	0	2.53136	0.965	0.4	0
Txnip	0	1.412	0.63	0.369	0		Nr4a3	0	3.57729	0.781	0.035	0		Pclaf	0	2.51904	0.691	0.007	0
Sptssa	0	1.28755	0.845	0.777	0		Nr4a1	0	3.42538	0.763	0.047	0		H2afz	0	2.47294	0.989	0.695	0
Lyst	0	1.28323	0.536	0.326	0		Tnf	0	3.40462	0.75	0.135	0		Anxa2	0	2.3541	0.886	0.047	0
Atp8a2	0	1.24672	0.404	0.07	0		Furin	0	3.33317	0.847	0.181	0		Mki67	0	2.34943	0.684	0.008	0
Ccl5	0	1.21248	0.876	0.818	0		Rgcc	0	3.08716	0.689	0.122	0		Hist1h2ap	0	2.26132	0.392	0.007	0
Ramp1	0	1.21167	0.485	0.177	0		Irf8	0	2.96423	0.846	0.308	0		Top2a	0	2.23626	0.591	0.016	0
Zfp36l2	0	1.17446	0.779	0.644	0		Gadd45b	0	2.68463	0.86	0.277	0		Birc5	0	2.23409	0.663	0.004	0
Id2	0	1.16675	0.991	0.93	0		Myc	0	2.62608	0.806	0.127	0		Ube2c	0	2.22916	0.736	0.003	0
Ccr9	1.61724e-266	1.11293	0.332	0.132	2.574e-262		Nfkbid	0	2.58442	0.772	0.179	0		Ly6c2	0	2.17646	0.846	0.162	0
Gm26740	0	1.0983	0.718	0.563	0		Gadd45g	0	2.55591	0.546	0.059	0		Hist1h1e	0	2.1152	0.729	0.062	0
Klrk1	3.10201e-99	1.0982	0.343	0.24	4.93716e-95		Il2ra	0	2.50923	0.875	0.122	0		Cenpa	0	2.07375	0.725	0.066	0
Pde7a	3.5944e-283	1.08386	0.433	0.252	5.72085e-279		Kdm6b	0	2.35646	0.812	0.106	0		S100a10	0	2.03036	1	0.762	0
St8sia4	6.0731e-274	1.08133	0.521	0.395	9.66594e-270		Srgn	0	2.34223	0.994	0.96	0		Plac8	0	2.01212	0.859	0.243	0
Rabac1	0	1.0721	0.714	0.64	0		Ncl	0	2.30912	0.99	0.908	0		Ass1	0	1.98876	0.868	0.071	0
Cxcr6	0	1.06549	0.915	0.837	0		Hspd1	0	2.28823	0.947	0.613	0		Itga4	0	1.89617	0.853	0.051	0
Slc38a2	1.68529e-282	1.05781	0.59	0.506	2.68231e-278		Nfkb1	0	2.26288	0.92	0.592	0		Pycard	0	1.86155	0.99	0.407	0
Asb2	2.32386e-280	1.05523	0.412	0.216	3.69866e-276		Pim1	0	2.22631	0.89	0.465	0		Klf2	0	1.82887	0.815	0.164	0
Lpar6	1.78622e-253	1.02271	0.429	0.261	2.84296e-249		Npm1	0	2.2181	0.995	0.978	0		Glrx	0	1.78039	0.919	0.133	0
Hcst	0	0.989798	0.861	0.852	0		Tnfrsf9	0	2.21615	0.656	0.091	0		Hist1h2ae	0	1.77575	0.396	0.013	0
Emb	1.7409e-241	0.981859	0.467	0.301	2.77082e-237		Egr3	0	2.18531	0.474	0.042	0		Gapdh	0	1.73658	1	0.835	0
Pde3b	1.16935e-210	0.980823	0.462	0.344	1.86115e-206		Cd40lg	0	2.17771	0.594	0.254	0		Emp3	0	1.72443	0.933	0.204	0
Klrd1	2.43462e-64	0.98073	0.3	0.22	3.87494e-60		Ccnd2	0	2.14319	0.985	0.846	0		Dut	0	1.64555	0.829	0.254	0
Ltb	0	0.978781	0.971	0.892	0		Cd160	0	2.06073	0.797	0.577	0		Arhgdib	0	1.6348	1	0.728	0
Cd226	0	0.961998	0.681	0.64	0		Zfp36l1	0	2.04796	0.814	0.423	0		Hmgn2	0	1.63429	0.881	0.273	0
Fth1	0	0.961849	0.996	0.993	0		Tagap	0	2.01329	0.731	0.141	0		Lmnb1	0	1.62048	0.737	0.111	0
Lmo4	1.22074e-128	0.961575	0.467	0.415	1.94293e-124		Bcl2a1b	0	2.0047	0.941	0.719	0		Ccnb2	0	1.59036	0.62	0.003	0
Nedd4	1.98083e-254	0.937307	0.399	0.216	3.1527e-250		Gnl3	0	1.9731	0.881	0.27	0		Cdca8	0	1.58647	0.6	0.014	0
Bcl11b	1.5519e-295	0.930025	0.645	0.594	2.47001e-291		Hsp90aa1	0	1.95328	0.979	0.82	0		Actg1	0	1.57339	1	0.982	0
2810474O19Rik	1.4339e-145	0.914282	0.507	0.476	2.2822e-141		Dusp2	0	1.94845	0.885	0.68	0		Lsp1	0	1.56982	0.999	0.576	0
Arl4c	1.29608e-157	0.909793	0.501	0.443	2.06285e-153		Slamf7	0	1.91322	0.845	0.484	0		Rrm2	0	1.56863	0.546	0.007	0
Fyb	0	0.898319	0.809	0.735	0		Srm	0	1.90187	0.821	0.202	0		Cotl1	0	1.54488	0.999	0.554	0
Serinc3	0	0.882596	0.709	0.647	0		Lta	0	1.89958	0.475	0.063	0		Actb	0	1.54262	1	0.999	0
Klf3	9.01324e-156	0.868556	0.5	0.426	1.43455e-151		Hspa5	0	1.89651	0.986	0.864	0		Reep5	0	1.53312	0.965	0.285	0
Gm2682	6.66369e-264	0.866935	0.678	0.634	1.06059e-259		Pim3	0	1.87528	0.762	0.109	0		Cks1b	0	1.53218	0.704	0.11	0
Btg2	0	0.85815	0.732	0.698	0		Rel	0	1.85029	0.732	0.242	0		Selenoh	0	1.53168	0.909	0.231	0
Tecpr1	1.09463e-155	0.854292	0.467	0.393	1.74222e-151		Hspa8	0	1.83982	0.998	0.988	0		Pfn1	0	1.50368	1	0.979	0
AY036118	0	0.854287	0.93	0.957	0		Mat2a	0	1.83744	0.914	0.506	0		Gmfg	0	1.49845	0.999	0.588	0
Pik3r1	8.521e-179	0.849039	0.501	0.438	1.3562e-174		Hspe1	0	1.81472	0.979	0.831	0		Coro1a	0	1.48582	1	0.776	0
Socs2	0	0.844765	0.229	0.036	0		Nolc1	0	1.81118	0.852	0.332	0		Tubb5	0	1.4789	0.946	0.586	0
Itgal	5.21462e-263	0.836619	0.688	0.729	8.29959e-259		Nop56	0	1.79517	0.896	0.464	0		H2afv	0	1.47865	0.954	0.396	0
Eif4a2	2.16386e-259	0.826795	0.666	0.655	3.44399e-255		Nop58	0	1.78865	0.882	0.445	0		Smc2	0	1.41952	0.614	0.088	0
Tmem59	6.03604e-210	0.82575	0.587	0.588	9.60696e-206		Nr4a2	0	1.77505	0.343	0.007	0		Bin2	0	1.39472	0.955	0.208	0
Ikzf2	4.32208e-120	0.821364	0.466	0.397	6.87903e-116		Orai1	0	1.74484	0.825	0.363	0		S100a11	0	1.39067	0.996	0.552	0
Rbl2	2.17316e-111	0.820715	0.436	0.397	3.4588e-107		Map2k3	0	1.7419	0.723	0.307	0		Cenpf	0	1.37689	0.438	0.003	0
Ccr2	9.81785e-204	0.81991	0.544	0.408	1.56261e-199		Cd69	0	1.73304	0.679	0.178	0		Tubb4b	0	1.3732	0.76	0.443	0
Apbb1ip	7.27159e-297	0.817172	0.703	0.71	1.15735e-292		Ddx21	0	1.73033	0.917	0.565	0		Txn1	0	1.37257	0.989	0.62	0
Foxn3	9.46408e-132	0.81487	0.504	0.482	1.5063e-127		Socs1	0	1.7282	0.671	0.286	0		Ctla2a	0	1.35008	0.861	0.341	0
Cirbp	5.1562e-131	0.81344	0.472	0.441	8.2066e-127		Eef1e1	0	1.72793	0.832	0.309	0		Cdca3	0	1.33623	0.603	0.003	0
Rps27	0	0.813078	0.999	0.998	0		Odc1	0	1.71895	0.832	0.433	0		Cks2	0	1.3239	0.636	0.127	0
Itm2c	2.57223e-151	0.811537	0.528	0.509	4.09395e-147		Jaml	0	1.70278	0.508	0.08	0		Clic1	0	1.30949	1	0.778	0
Fam189b	1.87903e-122	0.811045	0.476	0.447	2.99066e-118		Ppa1	0	1.69447	0.854	0.427	0		Flna	0	1.30421	0.85	0.101	0
Tnrc6b	9.01987e-127	0.800774	0.468	0.431	1.4356e-122		Spry1	0	1.69202	0.446	0.015	0		Tyms	0	1.294	0.634	0.034	0
Cox7a2l	0	0.799745	0.873	0.809	0		Kcnq1ot1	0	1.66755	0.897	0.627	0		Pglyrp1	0	1.29024	0.901	0.137	0
Rcbtb2	1.32573e-64	0.795674	0.443	0.45	2.11004e-60		Eif4a1	0	1.66229	0.976	0.848	0		Prelid1	0	1.28891	0.984	0.456	0
Rora	1.20747e-125	0.794586	0.487	0.435	1.9218e-121		Gch1	0	1.63657	0.538	0.064	0		Dbi	0	1.27546	0.916	0.313	0
Pnrc1	1.17273e-195	0.783022	0.621	0.644	1.86652e-191		Eif5a	0	1.62708	0.987	0.898	0		Cfl1	0	1.26465	1	0.941	0
Adcy7	8.11921e-112	0.780423	0.465	0.444	1.29225e-107		Nfkbia	0	1.59807	0.922	0.631	0		Gm10076	0	1.25619	0.989	0.49	0
AC163354.1	3.59654e-204	0.778507	0.228	0.075	5.72426e-200		Hsp90ab1	0	1.59639	0.998	0.986	0		Cenpe	0	1.24915	0.504	0.004	0
Zfp292	1.12013e-114	0.778372	0.511	0.518	1.7828e-110		C1qbp	0	1.58561	0.89	0.515	0		Tuba1b	0	1.23831	0.726	0.374	0
Pfdn5	0	0.777637	0.968	0.971	0		Irf4	0	1.5572	0.572	0.134	0		Gnai2	0	1.23556	0.998	0.59	0
St6galnac3	1.29466e-149	0.775499	0.357	0.231	2.06059e-145		Tfrc	0	1.55178	0.654	0.112	0		Lgals3	0	1.21278	0.506	0.047	0
Trip4	5.91503e-110	0.769503	0.306	0.207	9.41436e-106		Ppan	0	1.54266	0.755	0.189	0		Ppp1ca	0	1.21256	0.998	0.67	0
4930523C07Rik	7.41316e-117	0.759887	0.505	0.507	1.17988e-112		Cish	0	1.53284	0.686	0.115	0		S100a13	0	1.20782	0.98	0.353	0
Asxl2	5.16858e-77	0.756241	0.365	0.318	8.22632e-73		Nhp2	0	1.51712	0.887	0.54	0		Hmgb1	0	1.19741	0.993	0.807	0
Fam105a	2.74714e-127	0.754723	0.496	0.486	4.37235e-123		Kdm2b	0	1.50941	0.611	0.272	0		Spc24	0	1.19616	0.593	0.007	0
Arhgap15	5.16007e-161	0.742765	0.595	0.612	8.21277e-157		Serpina3g	5.60906e-128	1.50424	0.512	0.412	8.92738e-124		Cox5b	0	1.19606	0.991	0.596	0
Zfp512	1.10471e-57	0.73292	0.288	0.236	1.75825e-53		Mif	0	1.49982	0.932	0.721	0		Tpx2	0	1.18741	0.469	0.002	0
Ablim1	1.22272e-179	0.727497	0.61	0.612	1.94609e-175		Lyar	0	1.49716	0.796	0.385	0		Slamf6	0	1.18566	0.892	0.211	0
Ifngr1	5.69833e-38	0.726486	0.344	0.33	9.06945e-34		Ebna1bp2	0	1.48194	0.859	0.519	0		Rasgrp2	0	1.17837	0.735	0.112	0
Gimap8	2.55333e-82	0.725627	0.48	0.51	4.06387e-78		Hspa9	0	1.47491	0.832	0.408	0		Sh2d1a	0	1.1777	0.972	0.398	0
Zbtb38	1.26751e-59	0.723891	0.329	0.29	2.01736e-55		Bcl2a1d	0	1.46853	0.836	0.507	0		Cdc20	0	1.1765	0.459	0.014	0
Dguok	2.87959e-85	0.722706	0.442	0.437	4.58315e-81		Cd53	0	1.4678	0.963	0.824	0		Atpif1	0	1.17269	0.849	0.115	0
Wipf1	1.65581e-129	0.719976	0.561	0.605	2.63539e-125		Srsf7	0	1.45266	0.919	0.626	0		Cdk1	0	1.16507	0.464	0.004	0
Tespa1	3.63379e-249	0.718951	0.7	0.672	5.78353e-245		Egr1	0	1.44228	0.387	0.105	0		H2afx	0	1.16207	0.664	0.177	0
Cd37	1.48051e-255	0.717263	0.716	0.701	2.35637e-251		Hsph1	0	1.44157	0.69	0.238	0		Gmnn	0	1.1589	0.615	0.062	0
Mxd4	5.2385e-104	0.716456	0.426	0.358	8.33759e-100		Fbl	0	1.42495	0.887	0.559	0		Ccna2	0	1.15518	0.494	0.002	0
Crot	1.1087e-63	0.715088	0.351	0.316	1.76461e-59		Pdcd1lg2	0	1.41651	0.665	0.163	0		Ly6a	0	1.14769	0.998	0.726	0
Psap	1.55262e-90	0.711805	0.482	0.506	2.47114e-86		Fosl2	0	1.40835	0.473	0.034	0		Ahnak	0	1.14184	0.931	0.281	0
1810011H11Rik	2.84229e-216	0.70845	0.244	0.083	4.52379e-212		Snu13	0	1.40786	0.932	0.692	0		Anp32a	0	1.14141	0.987	0.526	0
Chd3	2.18825e-92	0.705305	0.526	0.57	3.48282e-88		Rsl1d1	0	1.40401	0.889	0.589	0		Gm8369	0	1.13377	0.789	0.101	0
Il2rb	3.52458e-236	0.682123	0.809	0.87	5.60973e-232		Dkc1	0	1.39516	0.789	0.403	0		Epsti1	0	1.12774	0.972	0.461	0
Chd2	1.85931e-48	0.678606	0.421	0.449	2.95928e-44		Gtpbp4	0	1.38647	0.848	0.484	0		Sh3bgrl3	0	1.12773	1	0.892	0
Rps24	0	0.676625	1	1	0		Yrdc	0	1.37541	0.755	0.285	0		S100a4	0	1.11331	0.561	0.105	0
Smad7	1.06965e-117	0.674614	0.368	0.258	1.70245e-113		Atf3	0	1.37023	0.311	0.003	0		Dek	0	1.1041	0.893	0.511	0
mt-Nd2	0	0.673218	0.999	1	0		Mrto4	0	1.35957	0.757	0.336	0		Slfn1	0	1.1009	0.861	0.162	0
Rbm5	2.04464e-78	0.672073	0.494	0.541	3.25424e-74		Rrs1	0	1.35727	0.713	0.225	0		Mcm3	0	1.10049	0.601	0.112	0
Cyld	9.16842e-55	0.671159	0.438	0.475	1.45925e-50		Egr2	0	1.34963	0.46	0.028	0		Rpl28	0	1.0947	1	0.992	0
Il18r1	1.38201e-82	0.666391	0.253	0.158	2.19961e-78		Slc41a1	0	1.33553	0.507	0.069	0		Cdc25b	0	1.08656	0.647	0.021	0
Gimap3	0	0.666276	0.878	0.905	0		Satb1	0	1.3329	0.843	0.693	0		Rrm1	0	1.08524	0.594	0.054	0
Lck	0	0.661783	0.832	0.81	0		Tgfb1	0	1.32383	0.827	0.565	0		Aes	0	1.08379	0.999	0.656	0
Bptf	1.38419e-107	0.659295	0.563	0.624	2.20308e-103		Tnfsf14	0	1.3214	0.641	0.194	0		Lig1	0	1.08232	0.529	0.025	0
Atf7ip	1.57127e-44	0.659209	0.409	0.436	2.50083e-40		Il17a	3.54321e-32	1.30839	0.018	0.002	5.63937e-28		Hmmr	0	1.08206	0.434	0.002	0
Nsd1	1.33212e-84	0.658728	0.512	0.571	2.1202e-80		Tnfaip3	0	1.3019	0.572	0.123	0		Mcm6	0	1.07906	0.72	0.16	0
Runx3	3.79842e-50	0.657584	0.361	0.343	6.04557e-46		Srsf2	0	1.29032	0.944	0.707	0		Slc25a4	0	1.06734	0.84	0.145	0
Pbxip1	3.99237e-44	0.657297	0.311	0.282	6.35425e-40		Timm8a1	0	1.28066	0.689	0.265	0		Psmb9	0	1.05842	0.987	0.511	0
Rps27rt	7.3436e-71	0.654223	0.435	0.436	1.16881e-66		Cacybp	0	1.27771	0.88	0.622	0		Tagln2	0	1.05624	0.938	0.525	0
Ctsw	1.60906e-132	0.653918	0.638	0.681	2.56099e-128		Btg1	0	1.25772	0.976	0.859	0		Nusap1	0	1.0494	0.363	0.002	0
Itgb2	1.61385e-184	0.653164	0.695	0.745	2.5686e-180		Set	0	1.25102	0.969	0.841	0		Smdt1	0	1.04603	0.989	0.51	0
Wwp1	4.79805e-114	0.651916	0.24	0.129	7.63658e-110		Rrad	8.31809e-217	1.24862	0.42	0.214	1.32391e-212		Smc4	0	1.04495	0.767	0.302	0
Nabp1	2.88924e-92	0.64934	0.457	0.413	4.59851e-88		Btg3	0	1.24626	0.543	0.066	0		Incenp	0	1.03877	0.587	0.037	0
Celf2	8.2196e-143	0.64376	0.619	0.651	1.30823e-138		Larp4	0	1.24021	0.668	0.252	0		Gnb2	0	1.03621	0.984	0.478	0
Gimap1	0	0.643471	0.894	0.911	0		Sema7a	0	1.22935	0.476	0.025	0		Ube2s	0	1.0353	0.902	0.587	0
Zfp652	6.04127e-78	0.643103	0.279	0.198	9.61528e-74		Rrp1b	0	1.2201	0.615	0.197	0		AW112010	0	1.0258	1	0.815	0
Tnrc6c	1.6649e-51	0.642767	0.427	0.464	2.64986e-47		Nifk	0	1.21852	0.736	0.355	0		Rpl41	0	1.0252	1	0.984	0
Itch	1.10373e-43	0.639467	0.366	0.368	1.7567e-39		Mphosph10	0	1.21287	0.775	0.401	0		Fxyd5	0	1.02403	0.997	0.684	0
Fam102a	4.40771e-54	0.638526	0.361	0.337	7.01531e-50		Eif1a	0	1.21097	0.681	0.287	0		Calm3	0	1.02196	0.964	0.492	0
Aplp2	1.88598e-32	0.638219	0.375	0.404	3.00173e-28		Jak2	0	1.20814	0.646	0.394	0		Kif11	0	1.02186	0.421	0.003	0
Clk1	1.873e-44	0.635136	0.438	0.492	2.98106e-40		Pfdn2	0	1.20748	0.889	0.636	0		Hist1h4d	0	1.02155	0.476	0.034	0
Mmp9	6.74461e-252	0.635009	0.129	0.009	1.07347e-247		Ndufaf4	0	1.20624	0.644	0.201	0		Cnn2	0	1.00779	0.99	0.458	0
Ier5	3.89131e-124	0.634975	0.654	0.687	6.19342e-120		Cdv3	0	1.20484	0.834	0.539	0		Prc1	0	1.00569	0.391	0.006	0
Coro2a	1.55627e-67	0.634	0.243	0.164	2.47697e-63		Ppp1r14b	0	1.1946	0.925	0.702	0		Phf11b	0	1.00454	0.847	0.123	0
Kdm2a	6.86416e-42	0.633548	0.383	0.399	1.0925e-37		Tomm20	0	1.18565	0.973	0.878	0		Tmsb10	0	0.998052	1	0.99	0
Tcf12	5.99921e-39	0.63328	0.382	0.4	9.54835e-35		Rgs1	9.93457e-94	1.18123	0.531	0.451	1.58119e-89		Dnmt1	0	0.987228	0.703	0.133	0
Arhgap9	5.63474e-102	0.63077	0.549	0.573	8.96825e-98		Rbpj	0	1.18093	0.674	0.349	0		Tmpo	0	0.984728	0.696	0.233	0
Cited2	8.43161e-35	0.628227	0.414	0.459	1.34198e-30		Slamf1	0	1.17845	0.555	0.229	0		Supt4a	0	0.983033	0.993	0.547	0
Rasgrp1	4.07416e-52	0.627935	0.409	0.411	6.48443e-48		Syncrip	0	1.17298	0.847	0.559	0		Mcm5	0	0.978481	0.58	0.067	0
Utrn	2.13516e-63	0.624005	0.501	0.558	3.39833e-59		Rilpl2	4.69005e-307	1.15852	0.651	0.475	7.46468e-303		Ezh2	0	0.973471	0.667	0.109	0
Ankrd44	3.06737e-70	0.616388	0.509	0.553	4.88203e-66		Cnbp	0	1.15831	0.956	0.805	0		Mcm7	0	0.971416	0.596	0.093	0
Tpt1	0	0.61074	1	1	0		Map3k8	0	1.1554	0.472	0.109	0		Ccnb1	0	0.969499	0.47	0.004	0
Rnf166	2.30763e-38	0.610522	0.362	0.368	3.67283e-34		Gzmb	0.00729388	1.14605	0.121	0.144	1		Cdkn2d	0	0.969329	0.731	0.11	0
Stk17b	5.67811e-149	0.608836	0.665	0.703	9.03729e-145		Ppid	0	1.14493	0.725	0.375	0		Snx2	0	0.966788	0.891	0.21	0
Tacc1	4.03772e-33	0.607086	0.412	0.467	6.42643e-29		Eif4e	0	1.14297	0.743	0.399	0		Tspo	0	0.965429	0.997	0.589	0
Kmt2e	1.54517e-65	0.603254	0.519	0.597	2.45929e-61		Fkbp4	0	1.14215	0.777	0.455	0		Sept1	0	0.965172	0.999	0.681	0
Herpud1	4.25556e-37	0.603193	0.379	0.395	6.77315e-33		Ranbp1	0	1.14184	0.918	0.641	0		Arpc5	0	0.952557	0.994	0.66	0
Tmem106b	1.25579e-30	0.602297	0.271	0.249	1.99871e-26		Tomm5	0	1.14023	0.843	0.657	0		Hist1h1c	0	0.94673	0.555	0.07	0
Inpp4b	5.33307e-96	0.601315	0.584	0.616	8.48812e-92		Wdr43	0	1.13979	0.721	0.369	0		Anxa6	0	0.946437	0.938	0.356	0
Sesn1	2.77059e-54	0.600022	0.271	0.212	4.40967e-50		Crem	0	1.13946	0.451	0.06	0		Prdx2	0	0.940653	0.979	0.473	0
Ypel3	1.94909e-50	0.598685	0.429	0.435	3.10217e-46		Rheb	0	1.13006	0.82	0.553	0		Cmtm7	0	0.940294	0.928	0.418	0
Acp5	3.94595e-54	0.598025	0.456	0.496	6.28037e-50		Naa50	0	1.12747	0.706	0.363	0		Rbm3	0	0.93739	1	0.924	0
Arhgap45	1.09688e-178	0.595834	0.707	0.64	1.7458e-174		Mybbp1a	0	1.11283	0.621	0.237	0		Ap2s1	0	0.92867	0.932	0.273	0
Elf1	3.53767e-76	0.594429	0.556	0.642	5.63055e-72		Cct3	0	1.11224	0.898	0.646	0		Asf1b	0	0.926685	0.517	0.012	0
Cbl	9.55369e-25	0.590982	0.385	0.44	1.52056e-20		M6pr	0	1.10177	0.729	0.466	0		Cd52	0	0.926067	1	0.954	0
Art2b	1.24528e-79	0.588503	0.575	0.645	1.98199e-75		Etf1	0	1.10074	0.771	0.484	0		Lsm4	0	0.917542	0.97	0.532	0
Sesn3	2.31621e-43	0.58771	0.417	0.437	3.68648e-39		Noc2l	0	1.09903	0.665	0.297	0		Cdkn3	0	0.917241	0.506	0.002	0
Phip	1.08758e-20	0.586426	0.376	0.428	1.73099e-16		Chchd4	0	1.0934	0.593	0.183	0		Ms4a4b	0	0.91523	0.999	0.848	0
Prkacb	1.45508e-21	0.584413	0.355	0.398	2.3159e-17		Tma16	0	1.0907	0.538	0.134	0		Dnajc15	0	0.910283	0.928	0.487	0
mt-Nd4	0	0.584003	0.999	1	0		Cycs	0	1.0884	0.882	0.617	0		Clspn	0	0.910139	0.447	0.009	0
Gabarapl2	1.11684e-188	0.581405	0.717	0.791	1.77757e-184		Rrp9	0	1.0835	0.6	0.209	0		Ptprcap	0	0.908184	1	0.843	0
Rb1cc1	8.65359e-15	0.580098	0.348	0.402	1.37731e-10		Rrp15	0	1.08343	0.624	0.237	0		Psmd8	0	0.900013	0.965	0.45	0
Shisa5	0	0.57941	0.985	0.936	0		Ndfip1	0	1.08318	0.837	0.609	0		Myl6	0	0.891561	1	0.967	0
Klrc2	6.0099e-33	0.578242	0.156	0.104	9.56535e-29		Ptges3	0	1.08003	0.84	0.552	0		Racgap1	0	0.890251	0.502	0.009	0
Klf13	2.66321e-36	0.575986	0.435	0.498	4.23876e-32		Cct8	0	1.07673	0.915	0.729	0		S1pr4	0	0.888518	0.822	0.162	0
Gpx4	5.1769e-143	0.575822	0.696	0.661	8.23956e-139		Tmed5	0	1.0761	0.828	0.599	0		Tmem14c	0	0.88716	0.953	0.387	0
Gm42418	0	0.575293	0.999	1	0		Eprs	0	1.07386	0.788	0.505	0		Anp32b	0	0.883031	0.985	0.722	0
Hipk1	1.48162e-23	0.574604	0.369	0.41	2.35814e-19		Junb	0	1.07221	0.924	0.756	0		Tuba1a	0	0.877787	0.751	0.157	0
mt-Nd5	0	0.573836	0.88	0.948	0		G3bp1	0	1.07184	0.929	0.737	0		Knstrn	0	0.867094	0.575	0.013	0
Mbp	1.0049e-31	0.573647	0.394	0.431	1.59941e-27		Larp1	0	1.07163	0.719	0.392	0		Anapc5	0	0.862233	0.819	0.241	0
Ikbkb	4.5404e-26	0.573132	0.36	0.392	7.2265e-22		Slc1a5	0	1.06879	0.677	0.38	0		Atp5k	0	0.855844	0.916	0.32	0
Vgll4	4.53124e-27	0.571744	0.392	0.444	7.21192e-23		Mir155hg	0	1.06701	0.384	0.046	0		Tk1	0	0.851379	0.511	0.007	0
Ly6e	0	0.570763	0.984	0.946	0		Gpr65	0	1.06598	0.583	0.208	0		Cox6b1	0	0.851299	0.994	0.649	0
Rpl30	0	0.570322	1	0.999	0		Utf1	0	1.05684	0.42	0.029	0		Hist1h1d	0	0.850996	0.409	0.011	0
Itpr2	1.38987e-23	0.569405	0.377	0.421	2.21212e-19		Magoh	0	1.05198	0.863	0.687	0		Hist2h2ac	0	0.846729	0.405	0.022	0
Ncor1	8.96961e-162	0.568463	0.711	0.806	1.4276e-157		Tgif1	0	1.04481	0.447	0.046	0		Knl1	0	0.845585	0.43	0.003	0
Zbtb20	1.08847e-80	0.567052	0.204	0.112	1.7324e-76		Nrip1	5.66817e-228	1.04429	0.545	0.35	9.02146e-224		Ndufb7	0	0.845452	0.984	0.596	0
Ptger4	2.76521e-39	0.565096	0.348	0.322	4.4011e-35		Arid5b	0	1.03881	0.532	0.249	0		Pkp3	0	0.84056	0.844	0.22	0
Zfp148	9.05204e-22	0.564695	0.357	0.399	1.44072e-17		Nsun2	0	1.03523	0.678	0.37	0		Gstp3	0	0.839265	0.69	0.054	0
Ets1	3.19804e-211	0.562084	0.826	0.818	5.09e-207		Eif2s2	0	1.03011	0.916	0.746	0		Tacc3	0	0.836745	0.49	0.007	0
Rab21	1.96536e-49	0.560865	0.494	0.59	3.12807e-45		Eif5b	0	1.03005	0.852	0.628	0		Ptms	0	0.832228	0.615	0.032	0
Nr3c1	7.19545e-39	0.558491	0.437	0.478	1.14523e-34		Isy1	0	1.02788	0.621	0.334	0		Tmsb4x	0	0.831335	1	0.998	0
Prex1	3.05848e-31	0.558073	0.405	0.447	4.86788e-27		Eif1ax	0	1.01967	0.794	0.563	0		Atp5j2	0	0.829601	0.991	0.701	0
Tasp1	1.24137e-45	0.557735	0.219	0.16	1.97577e-41		Esf1	0	1.01188	0.699	0.401	0		Arpc3	0	0.826793	0.999	0.83	0
Akap13	2.99057e-98	0.557243	0.605	0.661	4.75979e-94		Fasl	0	0.996165	0.588	0.194	0		Psmb8	0	0.826435	1	0.838	0
Tnk2	4.01522e-48	0.551477	0.209	0.148	6.39062e-44		Mdn1	0	0.992161	0.513	0.14	0		Atp5c1	0	0.824711	0.992	0.624	0
Il27ra	4.00449e-23	0.551402	0.391	0.446	6.37355e-19		Nip7	0	0.991741	0.698	0.4	0		Mtch1	0	0.822732	0.807	0.166	0
Etnk1	5.01048e-17	0.550906	0.328	0.358	7.97469e-13		Pdia6	0	0.986466	0.863	0.638	0		Itgb7	0	0.820491	0.956	0.428	0
Gimap6	1.16947e-249	0.549438	0.91	0.881	1.86133e-245		Hnrnpab	0	0.98206	0.9	0.652	0		Gng2	0	0.819106	0.851	0.189	0
Dusp1	5.88132e-68	0.54899	0.212	0.129	9.36071e-64		Slc3a2	0	0.974562	0.767	0.516	0		Ms4a6b	0	0.812066	0.997	0.751	0
Qpct	4.02666e-234	0.54729	0.185	0.038	6.40883e-230		Lap3	0	0.972334	0.556	0.21	0		Myo1f	0	0.808551	0.796	0.116	0
Dock2	2.31589e-116	0.546891	0.648	0.719	3.68597e-112		Csrnp1	0	0.971327	0.423	0.08	0		Hint1	0	0.80715	0.997	0.816	0
Snrk	5.44533e-21	0.546618	0.255	0.244	8.66679e-17		Cd3eap	0	0.971284	0.515	0.155	0		Cnp	0	0.805681	0.921	0.244	0
Pdcd4	2.21001e-107	0.546107	0.622	0.648	3.51745e-103		Pa2g4	0	0.965988	0.767	0.508	0		Prr13	0	0.803088	0.967	0.4	0
Kansl1	1.31806e-17	0.544733	0.357	0.412	2.09783e-13		Snrpd1	0	0.960633	0.887	0.643	0		Mrps16	0	0.795412	0.933	0.304	0
Arid1a	3.75342e-24	0.544128	0.438	0.536	5.97395e-20		Nfkbiz	0	0.954037	0.432	0.131	0		Tcf7	0	0.793688	0.656	0.173	0
Aak1	3.70782e-18	0.542409	0.376	0.44	5.90136e-14		Rcl1	0	0.953822	0.509	0.146	0		Psmd13	0	0.792732	0.894	0.303	0
Arid4b	5.28804e-20	0.541874	0.437	0.537	8.41645e-16		Dusp5	1.29512e-301	0.953323	0.457	0.21	2.06131e-297		Atox1	0	0.789332	0.936	0.312	0
H2-K1	0	0.540142	0.999	1	0		Umps	0	0.95267	0.537	0.225	0		Sdhb	0	0.786113	0.924	0.334	0
Gsk3b	7.52775e-13	0.539451	0.332	0.383	1.19812e-08		Apex1	0	0.948588	0.535	0.204	0		Dap	0	0.779276	0.867	0.232	0
Skap1	1.07251e-220	0.539047	0.845	0.807	1.707e-216		Sytl3	0	0.946854	0.531	0.265	0		Tln1	0	0.776273	0.973	0.457	0
Avl9	5.60373e-32	0.538421	0.276	0.25	8.9189e-28		Prmt1	0	0.943006	0.81	0.576	0		Tipin	0	0.774872	0.577	0.096	0
Krit1	1.04944e-30	0.538324	0.489	0.603	1.67029e-26		Ptma	0	0.942285	0.998	0.996	0		Spn	0	0.772199	0.847	0.215	0
Mylip	1.76143e-40	0.538023	0.231	0.18	2.80349e-36		Eea1	7.302e-228	0.941916	0.469	0.287	1.16219e-223		Ptpn6	0	0.771985	0.852	0.218	0
Ptbp3	2.57656e-64	0.536432	0.557	0.673	4.10086e-60		Fubp1	0	0.940923	0.899	0.729	0		Twf2	0	0.769387	0.891	0.246	0
Lax1	6.6697e-26	0.534664	0.312	0.311	1.06155e-21		Slc38a1	0	0.940887	0.8	0.628	0		Hmgn5	0	0.768332	0.663	0.08	0
Sdhaf1	4.59129e-10	0.534416	0.282	0.306	7.3075e-06		Utp18	0	0.940393	0.602	0.289	0		Rfc4	0	0.766975	0.543	0.046	0
Phf3	4.83993e-42	0.533448	0.49	0.591	7.70324e-38		Emc6	0	0.93616	0.798	0.573	0		Fbxo5	0	0.765473	0.396	0.02	0
Padi2	1.3099e-118	0.533229	0.182	0.074	2.08484e-114		Eif3g	0	0.935901	0.824	0.631	0		Ppil1	0	0.765279	0.764	0.164	0
Rpl12	0	0.532454	1	1	0		Eif2s1	0	0.934561	0.83	0.602	0		Ndufb8	0	0.764514	0.947	0.451	0
Pag1	4.28365e-42	0.529056	0.241	0.192	6.81785e-38		Ybx3	1.63408e-199	0.9337	0.567	0.42	2.6008e-195		Etfb	0	0.76398	0.869	0.264	0
Rbm39	1.74144e-257	0.528555	0.889	0.954	2.77168e-253		Serbp1	0	0.93196	0.987	0.922	0		Msn	0	0.763592	0.985	0.579	0
Mef2a	4.81966e-16	0.528164	0.294	0.308	7.67096e-12		Ier2	0	0.93187	0.798	0.647	0		Ube2m	0	0.75811	0.893	0.324	0
AI467606	6.70161e-16	0.527405	0.362	0.42	1.06663e-11		Timm9	0	0.930483	0.597	0.259	0		Mrpl18	0	0.756917	0.932	0.445	0
Trim12a	1.8543e-26	0.526964	0.424	0.485	2.9513e-22		Mtap	0	0.929589	0.537	0.228	0		Atad2	0	0.752804	0.604	0.14	0
Abhd8	1.11756e-24	0.524909	0.415	0.485	1.77871e-20		Sla	1.49924e-92	0.926771	0.555	0.511	2.38619e-88		Plk1	0	0.748679	0.376	0.003	0
Slc2a3	3.83744e-43	0.523282	0.223	0.167	6.10767e-39		Top1	0	0.925713	0.897	0.753	0		Eif4e2	0	0.748354	0.912	0.342	0
Esyt2	1.08648e-09	0.521108	0.286	0.321	1.72924e-05		Ccdc86	0	0.92307	0.523	0.177	0		Arpc1b	0	0.744799	0.999	0.883	0
Git2	1.32198e-19	0.520825	0.436	0.537	2.10406e-15		Srsf6	0	0.920432	0.82	0.588	0		Hells	0	0.744786	0.473	0.037	0
Ogt	1.58131e-120	0.517697	0.681	0.777	2.51681e-116		Chd1	0	0.918989	0.654	0.397	0		Uqcr10	0	0.744583	0.941	0.448	0
Ifi208	8.50569e-40	0.516967	0.227	0.174	1.35377e-35		Ddx10	0	0.918436	0.64	0.364	0		Smap1	0	0.743344	0.936	0.329	0
Heca	1.01987e-11	0.5166	0.262	0.275	1.62323e-07		Ahsa1	0	0.913162	0.738	0.503	0		Hmgb3	0	0.740585	0.576	0.053	0
Zfp638	1.08402e-15	0.516027	0.408	0.501	1.72532e-11		Nab2	0	0.91208	0.44	0.161	0		Rnh1	0	0.737403	0.876	0.235	0
Rgs3	3.81354e-10	0.515912	0.318	0.364	6.06963e-06		Eif3a	0	0.909976	0.939	0.789	0		Eno1	0	0.734955	0.881	0.35	0
Tnik	8.9246e-10	0.515774	0.298	0.336	1.42044e-05		Ehd1	0	0.909694	0.474	0.202	0		Aurkb	0	0.73322	0.392	0.002	0
Ube2h	3.50908e-18	0.514694	0.377	0.431	5.58505e-14		Gnl2	0	0.907636	0.56	0.238	0		Ezr	0	0.730505	0.928	0.381	0
Ctsd	4.07569e-119	0.514305	0.697	0.664	6.48687e-115		Wdr75	0	0.906192	0.524	0.19	0		Myo1g	0	0.72441	0.72	0.132	0
Cd72	1.38497e-54	0.513432	0.188	0.119	2.20432e-50		Tomm40	0	0.900967	0.675	0.416	0		Pfkp	0	0.722451	0.877	0.286	0
Prrt1	2.49138e-290	0.512018	0.156	0.013	3.96529e-286		Pus7	0	0.89851	0.414	0.044	0		Arl6ip1	0	0.722049	0.942	0.592	0
Tnfrsf1a	5.3605e-22	0.512	0.231	0.21	8.53177e-18		Dnaja1	0	0.898115	0.956	0.883	0		Add1	0	0.719803	0.757	0.127	0
mt-Co1	0	0.511816	1	1	0		Pgam1	0	0.88824	0.794	0.575	0		Elob	0	0.719468	0.993	0.721	0
Itm2b	0	0.511722	0.973	0.927	0		Kras	0	0.883852	0.664	0.472	0		Pgk1	0	0.717869	0.939	0.478	0
Cdc42ep3	1.43997e-09	0.511157	0.357	0.435	2.29185e-05		Rcc2	0	0.881485	0.676	0.414	0		Atp5g2	0	0.717824	0.997	0.773	0
mt-Atp6	0	0.510924	1	1	0		Slc19a1	0	0.881102	0.424	0.08	0		Gna15	0	0.715278	0.669	0.089	0
Kmt2c	3.30359e-21	0.510111	0.253	0.237	5.25799e-17		Ivns1abp	0	0.874391	0.571	0.275	0		Bak1	0	0.714246	0.745	0.109	0
Nipbl	2.07122e-21	0.509737	0.452	0.559	3.29656e-17		Snrpa1	0	0.866753	0.762	0.525	0		Kif22	0	0.714084	0.427	0.008	0
Ppp1r12a	1.35409e-115	0.508776	0.725	0.752	2.15518e-111		Ctps	0	0.865257	0.45	0.133	0		Prim1	0	0.708242	0.498	0.026	0
Rchy1	1.05796e-08	0.508322	0.359	0.449	0.000168385		Bhlhe40	0	0.859215	0.478	0.199	0		1500009L16Rik	0	0.708171	0.366	0.007	0
Clec2i	0.00123511	0.508096	0.285	0.344	1		Dnajb9	0	0.858459	0.446	0.125	0		Samhd1	0	0.706829	0.92	0.391	0
Ptpre	4.66899e-11	0.506568	0.244	0.25	7.43116e-07		Gcsh	0	0.856724	0.444	0.129	0		Ssna1	0	0.705279	0.805	0.18	0
AC149090.1	2.63255e-14	0.506371	0.265	0.27	4.18997e-10		Pno1	0	0.853811	0.519	0.223	0		Ifi209	0	0.702964	0.836	0.229	0
Zcchc11	4.07231e-16	0.505815	0.415	0.501	6.48149e-12		Ipo5	0	0.852313	0.517	0.253	0		Ndufb9	0	0.702903	0.983	0.577	0
Tgfbr2	1.76819e-08	0.505675	0.275	0.306	0.000281426		Ftsj3	0	0.849896	0.563	0.292	0		Calm1	0	0.702158	0.999	0.946	0
H2-Q6	1.4649e-14	0.505654	0.449	0.576	2.33154e-10		Strap	0	0.848109	0.742	0.52	0		Tpi1	0	0.69712	0.755	0.222	0
Crebrf	1.43725e-18	0.505328	0.228	0.211	2.28752e-14		Pabpc4	0	0.846731	0.493	0.203	0		Capzb	0	0.697095	0.995	0.762	0
Samd3	1.01479e-70	0.50445	0.191	0.108	1.61514e-66		Tnfaip8	0	0.845018	0.781	0.62	0		Abracl	0	0.696995	0.996	0.763	0
Cbx4	6.73492e-14	0.50228	0.268	0.277	1.07193e-09		Hilpda	0	0.842808	0.367	0.131	0		Acadl	0	0.692947	0.775	0.136	0
Lysmd2	2.70319e-25	0.501907	0.296	0.285	4.30239e-21		Hspa4	0	0.841798	0.798	0.594	0		Dlgap5	0	0.690839	0.467	0.022	0
Lrif1	2.59952e-10	0.501263	0.241	0.249	4.13739e-06		Timm10	0	0.837694	0.528	0.228	0		Prdx4	0	0.689659	0.57	0.035	0
Klhl24	5.58812e-42	0.500133	0.204	0.148	8.89405e-38		Ruvbl1	0	0.836467	0.618	0.372	0		Gpi1	0	0.689082	0.978	0.52	0
Pcmtd1	2.00281e-17	0.499692	0.232	0.218	3.18767e-13		Cct5	0	0.83262	0.916	0.763	0		Ywhah	0	0.686639	0.881	0.384	0
Pglyrp2	3.09977e-17	0.498749	0.324	0.351	4.9336e-13		Mpp6	0	0.830509	0.612	0.384	0		Pomp	0	0.686609	0.992	0.713	0
Rps14	0	0.49775	1	1	0		Cebpz	0	0.829467	0.64	0.388	0		Cdc42	0	0.686391	0.999	0.872	0
Ccnd3	1.99271e-76	0.497605	0.614	0.649	3.1716e-72		Ptpn22	1.65427e-249	0.8244	0.749	0.659	2.63293e-245		Tmem50a	0	0.682973	0.983	0.445	0
Trp53inp1	1.16777e-31	0.497316	0.219	0.178	1.85862e-27		Morf4l2	0	0.823752	0.562	0.305	0		Lamtor4	0	0.682872	0.935	0.328	0
Stap1	3.75841e-09	0.497111	0.372	0.449	5.98189e-05		Vsir	2.14366e-280	0.822446	0.674	0.499	3.41185e-276		Ndc80	0	0.681104	0.423	0.006	0
Saraf	1.6645e-41	0.496109	0.51	0.599	2.64922e-37		Sssca1	6.26089e-304	0.821917	0.571	0.351	9.96483e-300		Rpsa	0	0.680549	1	1	0
Tcrg-C1	1.53371e-41	0.495985	0.179	0.118	2.44105e-37		Timm17a	0	0.82114	0.711	0.501	0		Nrp1	0	0.67964	0.596	0.054	0
Zbtb4	4.1764e-121	0.493749	0.16	0.057	6.64715e-117		Atad3a	0	0.819228	0.428	0.133	0		Sec61b	0	0.677894	0.996	0.788	0
Birc2	8.14058e-13	0.492991	0.26	0.269	1.29565e-08		Crtam	3.05094e-223	0.814546	0.131	0.015	4.85587e-219		Cenpw	0	0.676838	0.526	0.015	0
Ptpn18	5.14278e-274	0.492156	0.947	0.907	8.18525e-270		Gar1	0	0.814325	0.606	0.366	0		Ndufs8	0	0.676255	0.88	0.296	0
Scp2	2.31749e-99	0.491664	0.626	0.693	3.68852e-95		Fabp5	4.81677e-227	0.81324	0.461	0.262	7.66637e-223		Uhrf1	0	0.676082	0.439	0.005	0
Laptm5	7.64022e-200	0.4909	0.874	0.818	1.21602e-195		Hif1a	1.40309e-258	0.813122	0.654	0.483	2.23315e-254		Phgdh	0	0.673566	0.782	0.276	0
Pik3ip1	5.71096e-120	0.49044	0.171	0.066	9.08957e-116		Gimap5	0	0.812966	0.872	0.77	0		Lockd	0	0.671972	0.499	0.01	0
Ppp1r15a	2.55915e-54	0.487739	0.269	0.195	4.07314e-50		Traf4	0	0.810524	0.375	0.073	0		Fmnl1	0	0.670569	0.761	0.136	0
Rinl	7.0004e-135	0.487639	0.716	0.694	1.11418e-130		Bcl2l11	7.28952e-179	0.807084	0.49	0.315	1.1602e-174		Gdi2	0	0.669221	0.97	0.525	0
Rps9	0	0.487231	1	1	0		Mak16	0	0.806491	0.639	0.409	0		Sri	0	0.668196	0.992	0.61	0
Cd3g	0	0.485857	0.987	0.968	0		Gramd1b	6.5553e-199	0.806301	0.451	0.265	1.04334e-194		Gimap7	0	0.667866	0.972	0.52	0
Hdhd5	6.37566e-30	0.484978	0.204	0.163	1.01475e-25		Dnttip2	0	0.803268	0.696	0.503	0		Ndufa11	0	0.667737	0.918	0.384	0
Irf2bpl	3.12866e-11	0.483642	0.225	0.225	4.97958e-07		Sar1a	0	0.803154	0.695	0.476	0		Rplp0	0	0.667069	1	0.999	0
Podnl1	7.20818e-25	0.482595	0.444	0.5	1.14725e-20		Grwd1	0	0.801596	0.44	0.126	0		Psmb3	0	0.665863	0.987	0.685	0
Abi3	2.15275e-54	0.482267	0.177	0.109	3.42632e-50		Noc4l	0	0.7967	0.475	0.206	0		Rnaseh2b	0	0.665342	0.612	0.07	0
Ash1l	3.02816e-12	0.481531	0.406	0.495	4.81962e-08		Ddx27	0	0.796375	0.64	0.421	0		Ccdc34	0	0.664878	0.518	0.033	0
Fchsd2	9.86884e-10	0.481408	0.275	0.298	1.57072e-05		Socs3	2.43874e-273	0.792309	0.28	0.08	3.8815e-269		Mrpl33	0	0.664186	0.946	0.436	0
Kctd12	6.53516e-50	0.48011	0.214	0.146	1.04014e-45		Ier3	2.14436e-59	0.792297	0.12	0.051	3.41297e-55		Ndufv2	0	0.663897	0.93	0.374	0
Phf21a	3.60253e-09	0.480039	0.215	0.218	5.73379e-05		Gm12840	3.29167e-120	0.791206	0.258	0.123	5.23903e-116		Mrpl27	0	0.663362	0.773	0.143	0
Sema4a	1.22701e-15	0.4797	0.239	0.231	1.95291e-11		Arf4	0	0.790182	0.822	0.644	0		Arpc4	0	0.663202	0.924	0.363	0
Jmjd1c	1.04439e-05	0.478975	0.299	0.352	0.166225		Shmt1	0	0.789472	0.359	0.065	0		Dnajc9	0	0.660634	0.71	0.191	0
Ppp1r9b	1.35934e-13	0.478773	0.226	0.219	2.16353e-09		Fos	1.65806e-229	0.789146	0.229	0.056	2.63896e-225		Fkbp2	0	0.660609	0.747	0.241	0
Slfn8	3.158e-13	0.478379	0.263	0.266	5.02627e-09		Ddx18	0	0.788319	0.629	0.393	0		Grk6	0	0.658902	0.802	0.182	0
Hectd1	6.53938e-68	0.477384	0.615	0.757	1.04081e-63		Serpinb6b	1.32068e-42	0.788298	0.577	0.593	2.10199e-38		Hist1h1a	0	0.658826	0.317	0.02	0
Sp100	1.98809e-96	0.475003	0.651	0.638	3.16425e-92		Atp2a2	0	0.787479	0.583	0.348	0		Ech1	0	0.657466	0.848	0.207	0
Spop	1.88188e-05	0.474597	0.334	0.415	0.29952		Zc3h15	0	0.782695	0.743	0.574	0		Cyb5a	0	0.657038	0.857	0.229	0
Tle4	4.95007e-05	0.474527	0.305	0.367	0.787852		Tcp1	0	0.779604	0.846	0.659	0		Eif3h	0	0.654346	0.999	0.832	0
Rsbn1l	2.69646e-22	0.474526	0.471	0.601	4.29168e-18		Batf	7.92365e-153	0.777231	0.573	0.466	1.26113e-148		Npc2	0	0.654066	0.969	0.452	0
Tmem243	5.54873e-09	0.474244	0.305	0.346	8.83136e-05		Rsl24d1	0	0.770598	0.621	0.409	0		Cdk2ap2	0	0.653784	0.978	0.513	0
Hopx	3.72033e-29	0.473917	0.52	0.612	5.92127e-25		Slc7a1	0	0.769379	0.385	0.129	0		Slbp	0	0.653769	0.735	0.335	0
Ugcg	7.05275e-18	0.473279	0.463	0.579	1.12252e-13		Npm3	0	0.767036	0.787	0.619	0		Ripor2	0	0.653262	0.741	0.143	0
Crtc3	1.75898e-07	0.471845	0.307	0.358	0.00279959		Hnrnpa0	0	0.76694	0.958	0.858	0		Taldo1	0	0.652368	0.973	0.52	0
Zc3hav1	1.74705e-19	0.471806	0.455	0.562	2.7806e-15		Mrps6	5.54783e-265	0.766174	0.514	0.309	8.82993e-261		Atp5e	0	0.651279	0.997	0.827	0
Sorl1	2.04425e-08	0.469512	0.205	0.206	0.000325364		Nop16	0	0.766072	0.438	0.162	0		Selenow	0	0.650967	0.986	0.652	0
Jak1	4.3717e-95	0.469069	0.707	0.81	6.958e-91		Mapk6	0	0.765061	0.415	0.163	0		Smc1a	0	0.650163	0.846	0.403	0
Ccdc88c	3.61042e-08	0.468475	0.381	0.479	0.000574635		Knop1	0	0.760496	0.547	0.305	0		Cdc42se1	0	0.649826	0.864	0.31	0
Itk	5.4967e-37	0.467818	0.502	0.586	8.74856e-33		Nfkbib	6.29218e-278	0.759643	0.571	0.376	1.00146e-273		Mcm4	0	0.649809	0.584	0.098	0
Prf1	2.53846e-62	0.466958	0.16	0.086	4.04021e-58		Serpinb9	9.91482e-50	0.759589	0.368	0.313	1.57804e-45		Hpf1	0	0.649371	0.774	0.235	0
Cdc42se2	2.11268e-09	0.46694	0.408	0.529	3.36254e-05		Eif3b	0	0.75908	0.671	0.451	0		Mad2l1	0	0.646185	0.509	0.019	0
Tigd2	5.92038e-05	0.466937	0.268	0.31	0.942287		Eif5	0	0.756773	0.898	0.795	0		Zbp1	0	0.644971	0.846	0.247	0
Ifi203	5.31665e-38	0.465759	0.542	0.604	8.46199e-34		Taf1d	2.17462e-234	0.754502	0.621	0.459	3.46113e-230		Cenpm	0	0.643017	0.496	0.005	0
Pkn1	8.20635e-11	0.464308	0.393	0.492	1.30612e-06		AC160336.1	7.52952e-148	0.754412	0.498	0.337	1.1984e-143		Dera	0	0.642788	0.736	0.122	0
Evl	5.73958e-60	0.464083	0.565	0.597	9.13511e-56		Stip1	0	0.751651	0.624	0.406	0		Bub1b	0	0.64244	0.399	0.004	0
Vezf1	1.22019e-05	0.463989	0.25	0.278	0.194206		Ube2q2	2.28833e-270	0.751148	0.455	0.23	3.6421e-266		Glipr2	0	0.639477	0.642	0.089	0
Neurl3	6.33411e-86	0.462516	0.15	0.065	1.00814e-81		Sdad1	0	0.7506	0.454	0.202	0		Nt5c	0	0.63902	0.945	0.424	0
Il18rap	5.83319e-11	0.461337	0.246	0.246	9.28411e-07		Atf4	9.49076e-306	0.744405	0.668	0.456	1.51055e-301		Atp5j	0	0.637391	0.989	0.768	0
Arhgap30	4.35292e-42	0.461299	0.546	0.645	6.9281e-38		Naf1	0	0.741411	0.373	0.085	0		Rac2	0	0.635585	1	0.883	0
Slc9a9	7.35283e-16	0.461062	0.233	0.222	1.17028e-11		Xbp1	8.17032e-264	0.74127	0.573	0.362	1.30039e-259		Rfc2	0	0.634742	0.681	0.133	0
Acyp1	3.59923e-05	0.460425	0.294	0.351	0.572853		Stx6	1.05483e-271	0.740509	0.554	0.343	1.67887e-267		Fkbp8	0	0.634466	0.901	0.322	0
Rps21	0	0.460383	0.998	0.997	0		Icos	1.15964e-43	0.739752	0.668	0.679	1.84568e-39		Arf5	0	0.633706	0.995	0.719	0
Ikzf1	1.33607e-45	0.459344	0.57	0.707	2.12649e-41		Eif1	0	0.739263	0.998	0.998	0		Kif23	0	0.630036	0.378	0.008	0
Grap2	2.27636e-06	0.459291	0.238	0.26	0.0362305		Znhit6	0	0.738763	0.449	0.187	0		Psmb10	0	0.628437	0.981	0.559	0
Gimap4	3.41377e-210	0.458501	0.959	0.883	5.43336e-206		Ran	0	0.736093	0.962	0.822	0		Tpm3	0	0.628239	0.983	0.708	0
Ptprc	2.99624e-227	0.458475	0.945	0.958	4.76882e-223		Nudc	0	0.732186	0.778	0.604	0		Rpa2	0	0.625721	0.606	0.11	0
P2rx7	3.11689e-11	0.457818	0.404	0.49	4.96084e-07		Ppat	2.36564e-283	0.728133	0.486	0.261	3.76516e-279		Lsm5	0	0.623685	0.837	0.341	0
Peak1	0.0029016	0.456098	0.279	0.334	1		Bzw1	0	0.727309	0.901	0.77	0		Smpdl3a	0	0.621634	0.943	0.363	0
Son	3.36307e-109	0.455737	0.714	0.859	5.35267e-105		Twistnb	0	0.726895	0.691	0.477	0		Cox6a1	0	0.621583	0.96	0.573	0
Prkcb	2.36557e-09	0.45551	0.21	0.209	3.76504e-05		Cdk17	3.36265e-288	0.726763	0.497	0.25	5.352e-284		Maf	0	0.619367	0.916	0.386	0
Nlk	4.85805e-12	0.455417	0.217	0.21	7.73208e-08		Stat5a	7.01839e-171	0.724563	0.329	0.161	1.11705e-166		Dctpp1	0	0.618809	0.709	0.228	0
Fam3c	1.14519e-06	0.455339	0.251	0.276	0.0182268		Ddx3x	2.33569e-268	0.720046	0.589	0.36	3.71748e-264		Mdh1	0	0.618545	0.947	0.448	0
Rps7	0	0.455061	1	0.999	0		Atp1a1	1.7866e-263	0.717388	0.626	0.447	2.84355e-259		Ywhae	0	0.618056	0.928	0.486	0
Slc50a1	1.86008e-07	0.452506	0.39	0.504	0.00296051		Purb	0	0.715511	0.83	0.695	0		Ube2l3	0	0.616347	0.97	0.597	0
Bnip3l	5.50511e-10	0.452214	0.41	0.521	8.76194e-06		Tuba4a	1.40458e-263	0.714381	0.665	0.47	2.23553e-259		Ebp	0	0.615752	0.849	0.235	0
Rgs2	7.7484e-81	0.451706	0.17	0.08	1.23324e-76		Dnaja2	0	0.713961	0.86	0.714	0		Ncapd2	0	0.615378	0.471	0.013	0
Btg1	0	0.451358	0.935	0.863	0		Hnrnpu	0	0.713895	0.963	0.854	0		Psmb1	0	0.614523	0.998	0.8	0
Pik3cd	0.0350785	0.44854	0.282	0.352	1		Il3	2.41149e-70	0.713664	0.025	0	3.83813e-66		Ncapg	0	0.612132	0.404	0.003	0
Zmynd11	0.000396894	0.448413	0.242	0.274	1		Plcxd2	0	0.712955	0.371	0.124	0		Exosc8	0	0.611654	0.806	0.312	0
Il2rg	8.51962e-45	0.44756	0.603	0.769	1.35598e-40		Polr1c	1.77476e-304	0.711651	0.518	0.274	2.82472e-300		Asap1	0	0.610782	0.86	0.318	0
Trpc4ap	0.00184063	0.44732	0.296	0.362	1		Aen	0	0.710714	0.416	0.141	0		Atp5o.1	0	0.610532	0.966	0.611	0
Adgre5	1.53548e-94	0.44667	0.672	0.748	2.44387e-90		Noc3l	0	0.709821	0.386	0.128	0		Snrpe	0	0.61037	0.989	0.733	0
Cd82	1.40906e-68	0.446538	0.665	0.769	2.24265e-64		Dimt1	0	0.708124	0.408	0.126	0		Spag7	0	0.609686	0.591	0.03	0
Trip12	0.0046481	0.446364	0.357	0.47	1		Wdr12	6.46151e-255	0.706802	0.493	0.284	1.02841e-250		Fis1	0	0.608284	0.968	0.472	0
Retreg1	9.71424e-06	0.446344	0.294	0.344	0.154612		Bcl2	4.41784e-60	0.706747	0.407	0.309	7.03143e-56		Aurkaip1	0	0.606988	0.957	0.501	0
Ighm	1.63601e-55	0.445377	0.548	0.541	2.60387e-51		Slc16a1	0	0.70337	0.384	0.142	0		Hp1bp3	0	0.606973	0.867	0.302	0
Fli1	0.01667	0.445079	0.328	0.424	1		Pwp1	2.67344e-301	0.702522	0.449	0.213	4.25505e-297		Cxcr3	0	0.606917	0.957	0.462	0
Zmynd8	0.0998757	0.444104	0.305	0.392	1		Aatf	4.27809e-284	0.700733	0.463	0.23	6.80901e-280		Cisd1	0	0.606345	0.665	0.128	0
Slc12a6	1.07772e-10	0.444015	0.203	0.197	1.71531e-06		Tnip3	2.52181e-272	0.695054	0.17	0.024	4.01371e-268		Raly	0	0.605684	0.926	0.485	0
Cdkn1b	0.00144515	0.44381	0.333	0.415	1		Dnajc21	4.94144e-256	0.693114	0.577	0.377	7.8648e-252		Cap1	0	0.605229	0.92	0.359	0
Chd6	4.00617e-09	0.443561	0.252	0.264	6.37621e-05		Plk3	2.05794e-267	0.691209	0.314	0.106	3.27542e-263		Grk2	0	0.602025	0.862	0.256	0
Atxn7l3b	4.82085e-15	0.443352	0.476	0.631	7.67287e-11		Cd82	7.04178e-292	0.690724	0.83	0.7	1.12077e-287		Vamp8	0	0.601813	0.947	0.354	0
Lncpint	4.49869e-30	0.443051	0.207	0.163	7.16012e-26		Alkbh1	2.21453e-246	0.690646	0.507	0.288	3.52465e-242		Haus4	0	0.601634	0.572	0.062	0
Aph1a	0.719139	0.442597	0.283	0.372	1		Uck2	1.09226e-252	0.690038	0.415	0.21	1.73845e-248		Gpx1	0	0.599321	0.896	0.38	0
Rab37	0.011528	0.441699	0.316	0.399	1		Ak2	8.50124e-259	0.688092	0.757	0.601	1.35306e-254		Rfc5	0	0.59631	0.523	0.044	0
Tspan32	1.55365e-57	0.441463	0.591	0.61	2.4728e-53		Gspt1	7.30747e-285	0.687679	0.737	0.555	1.16306e-280		Dhfr	0	0.593933	0.451	0.016	0
Herc1	0.048815	0.43858	0.265	0.324	1		Spag9	2.06691e-191	0.68752	0.469	0.291	3.2897e-187		Apobec3	0	0.592575	0.977	0.533	0
B2m	0	0.437794	0.998	0.999	0		Pum3	9.8576e-237	0.685341	0.494	0.294	1.56894e-232		Pmf1	0	0.590534	0.568	0.047	0
Idnk	6.09404e-10	0.437154	0.449	0.594	9.69928e-06		Cct7	7.49558e-305	0.68254	0.859	0.733	1.193e-300		Ufc1	0	0.590454	0.91	0.339	0
Rassf5	3.77087e-17	0.437068	0.463	0.583	6.00171e-13		Epop	0	0.682464	0.345	0.097	0		Csrp1	0	0.588544	0.62	0.075	0
Kdm5a	0.0428294	0.436855	0.358	0.478	1		Tra2a	0	0.6821	0.786	0.606	0		Tnfaip8l2	0	0.58751	0.797	0.185	0
Zfp644	0.000985388	0.436701	0.373	0.493	1		Dock10	1.89021e-190	0.679063	0.744	0.654	3.00846e-186		Atp5f1	0	0.587044	0.994	0.798	0
Ddit3	1.01416e-19	0.436287	0.186	0.156	1.61413e-15		Zfp593	4.22779e-252	0.678745	0.519	0.313	6.72896e-248		Dbnl	0	0.585357	0.882	0.315	0
Bcl2	7.36672e-59	0.436117	0.381	0.308	1.17249e-54		Nefh	2.36447e-276	0.678002	0.3	0.095	3.76329e-272		Akr1a1	0	0.58464	0.909	0.329	0
Ankrd12	4.32442e-07	0.435809	0.442	0.561	0.00688275		Sod2	1.81529e-252	0.677308	0.668	0.505	2.88921e-248		Nsd2	0	0.583571	0.549	0.083	0
Tbc1d1	0.0196132	0.435524	0.332	0.433	1		Slc29a1	3.45807e-211	0.67558	0.403	0.218	5.50387e-207		Esd	0	0.583569	0.945	0.422	0
Clec2d	1.32573e-42	0.435256	0.627	0.77	2.11003e-38		Vapa	0	0.675158	0.762	0.606	0		Ndufa13	0	0.582688	0.996	0.768	0
Cmtm6	0.000454622	0.434655	0.282	0.334	1		Sbno1	2.47744e-262	0.675127	0.713	0.557	3.94309e-258		Snrpc	0	0.581915	0.897	0.377	0
Cebpb	3.06633e-05	0.434642	0.307	0.361	0.488037		Mgat2	8.30136e-245	0.673679	0.665	0.501	1.32124e-240		Esco2	0	0.579888	0.31	0.001	0
AW011738	2.18077e-103	0.434637	0.147	0.055	3.47091e-99		Ssb	0	0.67077	0.912	0.8	0		Trappc1	0	0.578243	0.737	0.127	0
Fam53b	0.0461571	0.434619	0.317	0.409	1		Gm47283	4.78612e-224	0.670054	0.615	0.42	7.61758e-220		Psmb2	0	0.575801	0.965	0.591	0
Rpl17	0	0.434604	1	0.999	0		D030056L22Rik	2.56445e-141	0.669818	0.492	0.33	4.08158e-137		Rad21	0	0.574706	0.684	0.218	0
Rps15a	0	0.433969	1	0.999	0		Ppif	1.09287e-192	0.669606	0.385	0.206	1.7394e-188		Orc6	0	0.574299	0.51	0.084	0
Esco1	0.333643	0.433435	0.32	0.424	1		Brix1	2.58277e-248	0.667421	0.576	0.383	4.11074e-244		Tbc1d10c	0	0.573791	0.919	0.307	0
Ggnbp2	1.77811e-12	0.433282	0.466	0.616	2.83004e-08		Imp4	2.35546e-242	0.666264	0.597	0.421	3.74895e-238		Kif15	0	0.572846	0.478	0.084	0
Mndal	3.10267e-49	0.432112	0.592	0.674	4.9382e-45		Ubl3	1.57425e-162	0.665066	0.501	0.345	2.50557e-158		Ndufs6	0	0.5722	0.908	0.405	0
Krcc1	0.0041686	0.431778	0.37	0.491	1		St6galnac4	8.45288e-226	0.665034	0.444	0.246	1.34536e-221		Fen1	0	0.570656	0.527	0.085	0
Prkd3	1.00593e-29	0.431267	0.212	0.167	1.60103e-25		Srsf10	4.09306e-247	0.664325	0.676	0.497	6.51451e-243		Anxa5	0	0.570099	0.579	0.056	0
Rnf167	0.00593467	0.430989	0.332	0.422	1		Ell2	0	0.663368	0.273	0.067	0		Anp32e	0	0.569006	0.803	0.452	0
Diaph1	5.0827e-18	0.430627	0.489	0.624	8.08962e-14		Abce1	3.87535e-251	0.66329	0.525	0.312	6.168e-247		Rps2	0	0.568886	1	0.997	0
Trip11	0.0124939	0.430474	0.378	0.503	1		Fam162a	2.37006e-190	0.662246	0.582	0.441	3.77219e-186		Kif4	0	0.568712	0.375	0.001	0
Ddx50	5.02795e-10	0.429043	0.449	0.597	8.00249e-06		Mapkapk2	1.21251e-163	0.6619	0.502	0.354	1.92983e-159		Mvb12a	0	0.568521	0.781	0.176	0
Dennd4a	8.36804e-19	0.428944	0.25	0.225	1.33186e-14		Dopey2	4.5672e-61	0.661417	0.363	0.29	7.26916e-57		Arl4d	0	0.56815	0.705	0.17	0
Atp2b1	1.52763e-33	0.428924	0.597	0.739	2.43138e-29		Rpl7l1	7.73719e-248	0.660972	0.654	0.488	1.23145e-243		Wasf2	0	0.568148	0.826	0.244	0
Gtpbp2	0.166169	0.428814	0.283	0.359	1		Nop14	1.47784e-237	0.659738	0.492	0.282	2.35213e-233		Tap1	0	0.567898	0.926	0.409	0
Itpkb	0.0153077	0.427728	0.375	0.5	1		Nop10	2.94389e-286	0.656961	0.824	0.725	4.6855e-282		Anapc15	0	0.567866	0.603	0.079	0
AU020206	0.0600357	0.427619	0.333	0.431	1		Tsr1	7.53553e-291	0.655264	0.398	0.162	1.19935e-286		Arhgdia	0	0.565995	0.961	0.575	0
Stk10	0.032343	0.427437	0.333	0.433	1		Ifrd2	0	0.648994	0.345	0.099	0		Jpt1	0	0.565242	0.973	0.679	0
Tk2	1.67669e-29	0.427133	0.175	0.131	2.66863e-25		Bzw2	3.10112e-266	0.646897	0.79	0.631	4.93574e-262		Eif3k	0	0.565105	0.996	0.76	0
Crebbp	0.010844	0.424951	0.342	0.442	1		Nus1	7.75803e-254	0.645929	0.463	0.242	1.23477e-249		Slfn2	0	0.56481	0.988	0.647	0
Dennd4c	6.36493e-15	0.423819	0.189	0.169	1.01304e-10		Gfod1	9.9983e-259	0.645428	0.323	0.117	1.59133e-254		Dynll1	0	0.564243	0.966	0.662	0
Ctso	5.10572e-10	0.422893	0.193	0.186	8.12627e-06		Gabpb1	1.99454e-216	0.643145	0.399	0.206	3.17451e-212		Nans	0	0.563626	0.767	0.205	0
Rpl9	0	0.422372	0.999	1	0		Nme1	1.17439e-293	0.639523	0.927	0.806	1.86917e-289		Nudt21	0	0.561946	0.924	0.454	0
Smim14	0.031078	0.422254	0.31	0.394	1		Pfdn4	5.6288e-227	0.638919	0.581	0.413	8.95881e-223		Elof1	0	0.558418	0.778	0.211	0
Stk24	1.15806e-21	0.422139	0.509	0.656	1.84317e-17		Ppp1r16b	8.375e-162	0.637879	0.491	0.318	1.33297e-157		Atp5a1	0	0.557171	0.984	0.741	0
Mycbp2	1.16987e-18	0.422082	0.521	0.675	1.86197e-14		Txn2	2.5371e-234	0.637216	0.698	0.562	4.03805e-230		Tmem160	0	0.556891	0.953	0.457	0
Ep300	0.467565	0.42195	0.262	0.332	1		Amd1	0	0.636166	0.365	0.119	0		1700097N02Rik	0	0.556554	0.404	0.006	0
Taz	2.52413e-08	0.420497	0.199	0.197	0.000401741		Ipo7	6.84617e-224	0.6335	0.416	0.213	1.08964e-219		Hcls1	0	0.556367	0.928	0.373	0
9930111J21Rik2	5.98308e-07	0.419556	0.399	0.49	0.00952266		Sult2b1	0	0.632925	0.245	0.017	0		Pfdn1	0	0.555821	0.846	0.262	0
Parp8	6.24607e-74	0.419228	0.161	0.079	9.94124e-70		Agfg1	2.55876e-183	0.632586	0.604	0.456	4.07252e-179		Def6	0	0.555192	0.82	0.21	0
Neat1	0.577363	0.419086	0.258	0.325	1		Nol8	4.55895e-228	0.631023	0.434	0.221	7.25603e-224		Me2	0	0.554987	0.725	0.152	0
Rapgef6	4.30145e-19	0.418819	0.519	0.667	6.84619e-15		Tet2	1.44837e-166	0.630786	0.322	0.153	2.30522e-162		Ndufb10	0	0.554595	0.97	0.5	0
Mecp2	0.000724054	0.417681	0.206	0.224	1		Hccs	4.08021e-244	0.630606	0.356	0.151	6.49406e-240		Capg	0	0.553523	0.522	0.085	0
Cyth4	5.00485e-06	0.417506	0.408	0.527	0.0796572		Cct2	0	0.630383	0.907	0.782	0		Ldha	0	0.553071	0.991	0.742	0
Akap8l	2.68965e-07	0.41728	0.204	0.207	0.00428084		Tnfsf8	8.26507e-09	0.629498	0.127	0.105	0.000131547		Nubp1	0	0.552125	0.797	0.233	0
Ttc14	3.28583e-16	0.417235	0.517	0.692	5.22972e-12		Nop2	0	0.628486	0.35	0.118	0		Kif20b	0	0.55211	0.409	0.04	0
Bzw2	1.2373e-55	0.416851	0.613	0.701	1.96928e-51		Wdr18	3.29921e-221	0.628175	0.516	0.326	5.25102e-217		Idh3g	0	0.551867	0.774	0.183	0
Rps16	0	0.416732	1	1	0		Klf9	0	0.62796	0.293	0.039	0		Psmb5	0	0.551854	0.974	0.637	0
Gpsm3	1.78574e-81	0.416345	0.656	0.659	2.84218e-77		Utp14a	6.66606e-191	0.62745	0.477	0.302	1.06097e-186		Hadha	0	0.551839	0.801	0.218	0
Fam46a	0.0733286	0.415656	0.237	0.274	1		Psme3	8.96274e-217	0.627047	0.462	0.273	1.42651e-212		Uqcr11	0	0.551172	0.858	0.328	0
Abr	3.87783e-07	0.415461	0.178	0.176	0.00617195		Fam60a	1.53875e-208	0.626536	0.42	0.227	2.44908e-204		Ostf1	0	0.548977	0.932	0.4	0
Lamtor2	3.27687e-28	0.414742	0.514	0.649	5.21547e-24		Nfkb2	3.40613e-238	0.625819	0.434	0.215	5.4212e-234		Mrpl54	0	0.548765	0.868	0.313	0
Dnajc3	8.45568e-61	0.413025	0.638	0.756	1.34581e-56		Glrx5	4.58499e-219	0.623277	0.686	0.562	7.29747e-215		Rac1	0	0.548492	0.95	0.507	0
Pigp	0.0454587	0.41301	0.266	0.325	1		Hnrnpc	5.86523e-281	0.622545	0.851	0.727	9.33509e-277		Coro1b	0	0.547471	0.728	0.126	0
Rpl39	0	0.411657	0.996	0.995	0		Heatr1	4.65015e-254	0.622443	0.365	0.153	7.40118e-250		Aspm	0	0.547338	0.324	0.004	0
Nisch	0.279547	0.411288	0.311	0.406	1		Cflar	3.87133e-147	0.61773	0.565	0.439	6.16161e-143		Ndufs2	0	0.545777	0.875	0.302	0
Gm11808	0.00110021	0.411239	0.393	0.525	1		U2af1	3.06402e-242	0.617558	0.808	0.66	4.8767e-238		Ucp2	0	0.544995	0.98	0.599	0
Ppp3ca	0.157569	0.410025	0.335	0.443	1		Malt1	4.61867e-105	0.617077	0.441	0.325	7.35107e-101		Rasa3	0	0.544676	0.523	0.057	0
BC005537	0.599979	0.409706	0.331	0.445	1		Mettl1	8.09009e-271	0.614986	0.343	0.125	1.28762e-266		Ddx39	0	0.544607	0.857	0.427	0
Sh2d3c	0.193975	0.409233	0.261	0.324	1		Cluh	0	0.614709	0.324	0.074	0		Cox8a	0	0.544414	0.999	0.914	0
Plcg1	0.0300695	0.408854	0.211	0.242	1		Chd4	2.87091e-209	0.612091	0.782	0.667	4.56934e-205		Sptbn1	0	0.541743	0.776	0.231	0
Rnf130	5.85553e-35	0.40828	0.162	0.11	9.31966e-31		Tomm70a	1.83336e-178	0.607051	0.52	0.362	2.91798e-174		Cd47	0	0.541627	0.99	0.702	0
Phc3	6.9999e-09	0.408056	0.211	0.208	0.00011141		Camk2d	5.88004e-56	0.605597	0.436	0.387	9.35867e-52		Mrps21	0	0.54109	0.872	0.3	0
Arl6ip5	2.58467e-20	0.407712	0.483	0.601	4.11376e-16		Agpat5	8.48518e-179	0.605261	0.447	0.278	1.3505e-174		Cdkn2c	0	0.54107	0.435	0.058	0
Rpl5	0	0.40702	0.999	0.999	0		Eef1g	0	0.604873	0.978	0.948	0		H1f0	0	0.540859	0.487	0.071	0
Klf6	0.320782	0.407019	0.288	0.362	1		Polr3d	0	0.603805	0.349	0.114	0		Psmb4	0	0.54078	0.979	0.663	0
Gm14029	6.58845e-06	0.406786	0.166	0.164	0.104862		Naa15	6.23003e-183	0.603606	0.582	0.432	9.91572e-179		Mrpl34	0	0.540354	0.867	0.287	0
Tmem176a	6.71825e-35	0.406765	0.112	0.063	1.06928e-30		Nup98	1.10068e-193	0.603274	0.441	0.251	1.75184e-189		Ndufa8	0	0.539866	0.938	0.435	0
Smim10l1	0.0392361	0.40662	0.222	0.257	1		Rars	5.43459e-194	0.601919	0.582	0.431	8.64969e-190		Maz	0	0.538463	0.777	0.222	0
Herc3	1.29224e-20	0.405998	0.149	0.115	2.05672e-16		Pcbp1	2.07413e-216	0.601032	0.807	0.686	3.30119e-212		Msrb1	0	0.537137	0.638	0.078	0
Setd1b	0.00889946	0.404728	0.2	0.221	1		Ddx5	0	0.600931	0.992	0.98	0		Oaz1	0	0.536755	1	0.979	0
Use1	9.86983e-08	0.404632	0.47	0.644	0.00157088		Srxn1	4.61655e-219	0.600815	0.16	0.028	7.34769e-215		Sike1	0	0.536678	0.64	0.105	0
Gm12216	0.510557	0.404146	0.232	0.284	1		Rnf149	1.03713e-241	0.599607	0.37	0.156	1.6507e-237		Hist1h2ab	0	0.536633	0.277	0.001	0
Nedd9	1.74133e-06	0.404121	0.371	0.446	0.027715		Eif3j1	3.71948e-169	0.597044	0.508	0.357	5.91993e-165		Park7	0	0.534681	0.978	0.603	0
Stk4	3.26579e-18	0.403944	0.474	0.588	5.19783e-14		Mrpl12	3.76031e-215	0.596221	0.711	0.558	5.9849e-211		Gltp	0	0.534331	0.789	0.203	0
Rpl27a	0	0.403821	1	1	0		Arhgef3	3.36399e-97	0.596169	0.464	0.36	5.35413e-93		Tpm4	0	0.533494	0.847	0.354	0
4833420G17Rik	0.92842	0.403671	0.298	0.401	1		Imp3	9.01471e-238	0.594204	0.777	0.671	1.43478e-233		Ubc	0	0.532487	0.994	0.866	0
Ing1	0.604297	0.403365	0.297	0.403	1		Txnl4a	2.28429e-162	0.592213	0.56	0.427	3.63568e-158		Rpa1	0	0.531934	0.627	0.101	0
Rpl19	0	0.40332	1	1	0		Ahr	0	0.591989	0.196	0.024	0		Cox4i1	0	0.531832	1	0.941	0
Os9	0.584915	0.403246	0.366	0.512	1		Kti12	3.36757e-202	0.591645	0.49	0.304	5.35982e-198		Mrpl57	0	0.531487	0.893	0.357	0
Kmt5b	0.0191185	0.402777	0.232	0.268	1		Trpm6	0	0.591504	0.258	0.04	0		Mrpl58	0	0.53132	0.844	0.245	0
Tcp11l2	2.72263e-44	0.402366	0.171	0.11	4.33333e-40		Hbegf	0	0.590115	0.203	0.025	0		Ccne1	0	0.53045	0.379	0.006	0
Zbtb7a	0.0447036	0.402132	0.295	0.413	1		Ltv1	5.20262e-203	0.589269	0.415	0.227	8.28049e-199		Psma4	0	0.529978	0.958	0.577	0
Pdk1	1.83774e-16	0.40186	0.174	0.147	2.92495e-12		Prkch	1.42926e-155	0.587084	0.606	0.481	2.2748e-151		S1pr1	0	0.528697	0.541	0.057	0
Zkscan3	3.33586e-07	0.401771	0.207	0.209	0.00530935		Rif1	1.21478e-167	0.584582	0.594	0.438	1.93344e-163		Cst7	0	0.52789	0.693	0.173	0
Sept9	8.2521e-10	0.401638	0.441	0.57	1.3134e-05		Trmt61a	0	0.584046	0.302	0.063	0		1810037I17Rik	0	0.52669	0.886	0.432	0
Zfp945	2.30576e-25	0.401474	0.156	0.116	3.66985e-21		Wdr3	1.99103e-200	0.583768	0.393	0.204	3.16893e-196		Pdlim2	0	0.525405	0.776	0.165	0
Cd3e	2.33998e-94	0.401375	0.792	0.862	3.72431e-90		Bcl2l1	3.7321e-158	0.582331	0.34	0.175	5.94001e-154		Mrps18c	0	0.525342	0.812	0.242	0
Nufip2	0.000649902	0.40099	0.393	0.504	1		Lif	2.81289e-275	0.58069	0.124	0.007	4.47699e-271		Sdf2l1	0	0.524863	0.675	0.175	0
Cln3	4.18794e-05	0.400659	0.177	0.18	0.666553		Rpf2	3.3505e-181	0.580461	0.438	0.269	5.33265e-177		Eif3f	0	0.522982	0.998	0.81	0
Efr3a	0.254274	0.400269	0.304	0.421	1		Cxcl10	0.421914	0.579448	0.055	0.053	1		Ap1s1	0	0.521022	0.677	0.11	0
Ttc28	6.93443e-99	0.399754	0.139	0.05	1.10368e-94		Gm26917	6.57188e-185	0.578884	0.737	0.604	1.04598e-180		Rgs10	0	0.518717	0.596	0.214	0
Rp9	2.44368e-26	0.399687	0.525	0.654	3.88936e-22		Hdgf	7.28268e-185	0.578618	0.741	0.583	1.15911e-180		Myl12b	0	0.518567	0.997	0.766	0
Arhgap18	0.948555	0.399576	0.278	0.364	1		Bysl	7.44499e-203	0.577956	0.365	0.178	1.18495e-198		Rdm1	0	0.51805	0.575	0.08	0
Pura	0.253908	0.398645	0.367	0.506	1		Gpatch4	1.70757e-180	0.576028	0.414	0.231	2.71777e-176		Nucks1	8.80785e-241	0.517488	0.841	0.59	1.40186e-236
Numa1	0.693109	0.398404	0.302	0.401	1		Fasn	2.33551e-209	0.572822	0.373	0.178	3.71721e-205		Ssr2	0	0.516934	0.894	0.415	0
Bmyc	6.00673e-25	0.397739	0.184	0.144	9.56031e-21		Tars	3.18675e-138	0.569514	0.466	0.333	5.07203e-134		Kcnn4	0	0.516634	0.662	0.143	0
Pten	0.363445	0.397719	0.339	0.457	1		Luc7l	1.48638e-172	0.569314	0.475	0.309	2.36572e-168		Hsd11b1	0	0.516457	0.713	0.173	0
Csnk1g2	0.00827979	0.396743	0.395	0.539	1		Nol11	7.52357e-171	0.56814	0.501	0.345	1.19745e-166		Psma1	0	0.513486	0.941	0.503	0
Tab2	0.830966	0.396715	0.289	0.381	1		Mrfap1	4.09025e-225	0.565803	0.783	0.665	6.51005e-221		Snf8	0	0.513254	0.875	0.345	0
Paip2	7.85765e-45	0.396603	0.593	0.718	1.25062e-40		Ahctf1	2.65585e-173	0.565198	0.4	0.221	4.22705e-169		Lat	0	0.51284	0.988	0.703	0
Zfp36	0.0186425	0.396458	0.218	0.244	1		Gm45716	2.3986e-72	0.563377	0.358	0.271	3.81762e-68		Sf3b2	0	0.512644	0.957	0.584	0
Rps23	0	0.39621	1	1	0		Hsd17b12	1.3612e-171	0.562953	0.447	0.285	2.16649e-167		Ctsa	0	0.512497	0.721	0.143	0
Mindy2	0.658148	0.39615	0.241	0.309	1		Manf	1.39278e-133	0.562138	0.797	0.697	2.21675e-129		Supt16	0	0.512078	0.864	0.432	0
Ptk2b	0.43444	0.395874	0.327	0.435	1		Pvt1	0	0.561567	0.281	0.062	0		Mxd3	0	0.510614	0.314	0.001	0
Cbx7	2.12081e-11	0.395787	0.171	0.154	3.37548e-07		Mapkapk3	4.85617e-178	0.560508	0.353	0.175	7.72908e-174		Cd48	0	0.510349	0.962	0.589	0
Cd96	1.12775e-05	0.395463	0.233	0.25	0.179493		Rbbp7	6.43732e-161	0.560378	0.664	0.517	1.02456e-156		Ppih	0	0.510198	0.627	0.121	0
Pink1	1.34245e-09	0.394544	0.172	0.16	2.13665e-05		Slc25a33	3.73587e-210	0.560186	0.331	0.147	5.94601e-206		Cenpx	0	0.509446	0.833	0.296	0
Atxn2l	0.896722	0.394335	0.331	0.458	1		Slc7a5	0	0.560076	0.261	0.042	0		Psmc3	0	0.508858	0.881	0.398	0
Ddx6	2.13193e-11	0.3939	0.492	0.65	3.39318e-07		Jarid2	2.86771e-97	0.559765	0.374	0.252	4.56424e-93		Dbf4	0	0.508621	0.482	0.062	0
Klrc1	0.0934411	0.393605	0.145	0.15	1		Icam1	1.44773e-97	0.557839	0.398	0.257	2.30421e-93		Ndufv3	0	0.507833	0.909	0.336	0
Il16	1.00289e-07	0.393578	0.41	0.513	0.0015962		Mogs	6.08365e-163	0.557634	0.461	0.297	9.68273e-159		E2f2	0	0.506904	0.41	0.003	0
H2-Q4	0.107549	0.393414	0.373	0.502	1		Hivep3	1.84021e-114	0.557272	0.23	0.104	2.92888e-110		Tmem126a	0	0.505916	0.752	0.174	0
Baz2a	0.491781	0.392081	0.242	0.313	1		Mettl16	2.14292e-187	0.553926	0.407	0.221	3.41068e-183		Rfc3	0	0.503738	0.435	0.048	0
2810001G20Rik	0.000239149	0.391883	0.209	0.224	1		Pin1	4.24826e-172	0.552804	0.588	0.459	6.76153e-168		Actr3	0	0.502428	0.999	0.828	0
Setd2	0.328618	0.391646	0.267	0.354	1		Ifrd1	2.78468e-159	0.552532	0.385	0.217	4.4321e-155		Rfc1	0	0.501173	0.59	0.109	0
Arhgef6	0.295878	0.391614	0.346	0.466	1		Polr1b	0	0.552217	0.275	0.052	0		Capns1	0	0.500731	0.902	0.348	0
Dennd1b	0.491222	0.391441	0.261	0.328	1		Pcgf5	9.79907e-159	0.550894	0.451	0.278	1.55962e-154		Rpl29	0	0.500108	1	0.98	0
Rflnb	1.16995e-92	0.390897	0.115	0.037	1.8621e-88		Canx	1.53457e-176	0.550467	0.73	0.599	2.44242e-172		Cmah	0	0.49971	0.434	0.023	0
Fam208a	0.473201	0.390538	0.277	0.367	1		Tra2b	8.14477e-223	0.550178	0.785	0.656	1.29632e-218		Fignl1	0	0.49926	0.397	0.004	0
Rbms1	0.0222834	0.390134	0.361	0.475	1		Snrpb	5.1132e-287	0.550116	0.931	0.834	8.13817e-283		Siva1	0	0.498436	0.552	0.144	0
Rhoh	1.09263e-13	0.389613	0.483	0.631	1.73903e-09		Mrpl15	3.30947e-169	0.549917	0.635	0.524	5.26735e-165		Shcbp1	0	0.498278	0.371	0.004	0
Pnisr	2.52421e-19	0.389322	0.553	0.733	4.01754e-15		Slc5a3	1.64644e-283	0.549677	0.27	0.07	2.62048e-279		Aip	0	0.497449	0.77	0.191	0
Cwf19l2	0.872152	0.388928	0.215	0.267	1		Pole4	1.10594e-168	0.549279	0.639	0.505	1.76021e-164		Srrt	0	0.497444	0.715	0.189	0
Taok1	0.00474364	0.388898	0.194	0.211	1		Ndufab1	2.95641e-191	0.548884	0.758	0.641	4.70543e-187		Sdcbp2	0	0.497067	0.391	0.02	0
Rassf2	0.0182128	0.388337	0.202	0.226	1		Gpr18	1.05582e-47	0.548587	0.364	0.304	1.68045e-43		Ppia	0	0.496975	1	0.996	0
Mkln1	0.324997	0.387112	0.296	0.404	1		Gfi1	4.85089e-134	0.547865	0.361	0.206	7.72067e-130		Rad51	0	0.496144	0.382	0.004	0
Tram1	1.71317e-15	0.386423	0.503	0.654	2.72668e-11		Marcksl1	6.40162e-180	0.547823	0.21	0.066	1.01888e-175		Ppib	0	0.495766	0.996	0.795	0
Ndufa6	1.25276e-34	0.385306	0.581	0.735	1.9939e-30		Cblb	3.2951e-121	0.546801	0.437	0.294	5.24448e-117		Dtymk	0	0.494995	0.694	0.212	0
Cul3	7.99109e-17	0.384007	0.506	0.662	1.27186e-12		Psma5	3.59399e-207	0.545286	0.77	0.653	5.72019e-203		Snapc5	0	0.494624	0.804	0.213	0
Prdx5	3.55764e-39	0.383998	0.579	0.715	5.66234e-35		Dcun1d5	1.83405e-183	0.54507	0.697	0.58	2.91908e-179		Ifngas1	0	0.494527	0.399	0.005	0
Tor1aip1	0.634961	0.38361	0.365	0.504	1		Pou2f2	3.25777e-28	0.544848	0.369	0.343	5.18507e-24		Cit	0	0.494423	0.38	0.004	0
Irf2bp2	1.85774e-06	0.383227	0.446	0.582	0.0295678		Rnf19b	2.70684e-131	0.544443	0.367	0.219	4.3082e-127		Pmvk	0	0.494231	0.541	0.038	0
Ddx58	0.279178	0.383124	0.236	0.284	1		Zmynd19	4.55658e-245	0.543029	0.331	0.129	7.25226e-241		Tbcb	0	0.492943	0.82	0.239	0
Ptpn7	1.77637e-08	0.382924	0.47	0.605	0.000282728		Riox1	8.4951e-204	0.54297	0.4	0.203	1.35208e-199		Tmem258	0	0.492801	0.905	0.4	0
Selplg	2.07912e-65	0.38209	0.702	0.716	3.30912e-61		Sh2d2a	8.2179e-113	0.542153	0.668	0.62	1.30796e-108		Pdlim1	0	0.492738	0.538	0.095	0
Limd2	2.58868e-131	0.381548	0.884	0.812	4.12014e-127		Ubxn2a	4.04816e-111	0.541344	0.383	0.254	6.44306e-107		Frg1	0	0.49235	0.827	0.295	0
F2r	2.02593e-16	0.381266	0.26	0.243	3.22447e-12		Eif6	3.30541e-174	0.539503	0.75	0.637	5.26089e-170		Ttc39c	0	0.491606	0.585	0.067	0
Ssh2	4.11438e-07	0.380772	0.174	0.168	0.00654845		Rnf4	2.30989e-166	0.539008	0.496	0.332	3.67642e-162		Sgo2a	0	0.490866	0.325	0.002	0
Setd5	0.301802	0.380667	0.323	0.448	1		Ier5	1.98146e-236	0.53822	0.806	0.632	3.1537e-232		Nrm	0	0.490731	0.478	0.027	0
Pnrc2	0.087627	0.380228	0.261	0.354	1		Rad23b	2.15675e-155	0.537917	0.498	0.34	3.43269e-151		Htatip2	0	0.490045	0.653	0.1	0
Junb	1.39322e-155	0.380073	0.793	0.8	2.21746e-151		Ikzf3	1.10154e-52	0.537241	0.594	0.575	1.75321e-48		Mis18bp1	0	0.489876	0.304	0.003	0
Abcb1a	3.20785e-58	0.379697	0.131	0.063	5.10561e-54		Llph	1.73182e-186	0.536611	0.798	0.696	2.75636e-182		Scand1	0	0.489209	0.975	0.54	0
Antxr2	3.25778e-25	0.379369	0.145	0.104	5.18508e-21		Pdcd1	2.96379e-147	0.536237	0.302	0.151	4.71716e-143		Uqcrc1	0	0.489127	0.831	0.29	0
Eid1	0.844183	0.379364	0.299	0.394	1		Snrpf	4.21032e-243	0.535985	0.89	0.783	6.70115e-239		Pstpip1	0	0.488097	0.801	0.209	0
Fam168b	0.0240139	0.379332	0.248	0.337	1		Tcerg1	9.23901e-127	0.535332	0.499	0.368	1.47048e-122		Nasp	0	0.487861	0.704	0.348	0
Rpl9-ps6	1.53256e-07	0.378935	0.239	0.249	0.00243922		Papd7	3.14339e-230	0.532611	0.285	0.098	5.00302e-226		Vps29	0	0.487643	0.882	0.357	0
Cd3d	2.33725e-201	0.378546	0.976	0.951	3.71997e-197		Naa25	3.92352e-240	0.531638	0.308	0.11	6.24467e-236		Dgka	0	0.487525	0.684	0.134	0
Mgat4a	4.35515e-39	0.378212	0.15	0.093	6.93165e-35		Arl5b	2.75908e-307	0.528114	0.247	0.052	4.39135e-303		Swi5	0	0.486442	0.917	0.456	0
Ttc3	0.238579	0.377956	0.224	0.262	1		Rbm25	9.68121e-218	0.528004	0.87	0.79	1.54086e-213		Csk	0	0.485226	0.929	0.41	0
Zfp950	0.547133	0.375998	0.226	0.273	1		Mtdh	4.28425e-178	0.527075	0.796	0.703	6.81881e-174		Pym1	0	0.484938	0.61	0.087	0
Fam204a	0.000991858	0.375526	0.266	0.377	1		Sfpq	1.29694e-195	0.526221	0.879	0.739	2.06421e-191		Wdr1	0	0.48464	0.865	0.321	0
Nktr	7.47434e-14	0.375255	0.543	0.725	1.18962e-09		Xpot	5.91335e-201	0.525488	0.313	0.132	9.41169e-197		Diaph3	0	0.483273	0.386	0.009	0
Dyrk2	3.29844e-10	0.375206	0.181	0.167	5.24979e-06		Serp1	3.83439e-124	0.525234	0.595	0.498	6.10281e-120		Fermt3	0	0.482001	0.893	0.322	0
Ube3a	0.260785	0.375146	0.42	0.593	1		Pum1	2.53148e-128	0.522687	0.501	0.368	4.02911e-124		Mrpl42	0	0.480698	0.824	0.292	0
Znrf2	0.0420559	0.374934	0.298	0.422	1		Zap70	1.39315e-152	0.522264	0.78	0.701	2.21734e-148		Spc25	0	0.480234	0.326	0.004	0
Mgst2	8.83861e-05	0.374167	0.204	0.213	1		Abcf2	3.19427e-142	0.522036	0.426	0.281	5.084e-138		Ifi214	0	0.47993	0.514	0.07	0
Rbm4b	0.136585	0.373894	0.27	0.361	1		Ahcyl2	1.92403e-126	0.518697	0.558	0.419	3.06229e-122		Prdx1	0	0.47951	0.971	0.694	0
Prrc2b	0.0179526	0.373318	0.286	0.404	1		Dhx15	2.9148e-153	0.518198	0.572	0.436	4.63919e-149		Ten1	0	0.479387	0.727	0.147	0
Irf2	0.441291	0.371916	0.389	0.54	1		Mfsd2a	0	0.518158	0.225	0.014	0		Aprt	8.1723e-296	0.479308	0.904	0.526	1.3007e-291
Trappc6b	0.239859	0.371751	0.387	0.548	1		Glrx3	2.09808e-162	0.517722	0.702	0.598	3.33931e-158		Commd1	0	0.477009	0.734	0.198	0
Il10rb	0.0208881	0.371728	0.221	0.296	1		Krr1	9.18546e-136	0.517699	0.424	0.272	1.46196e-131		Chaf1a	0	0.476375	0.377	0.005	0
Btbd11	5.00242e-14	0.370449	0.142	0.116	7.96185e-10		Zeb2	2.22253e-196	0.517544	0.206	0.058	3.53737e-192		Alyref	0	0.47554	0.78	0.397	0
Dcaf8	0.0230753	0.370436	0.274	0.382	1		Nfat5	2.6073e-111	0.517489	0.374	0.229	4.14978e-107		Gins2	0	0.475468	0.405	0.013	0
Churc1	7.16587e-10	0.370414	0.464	0.595	1.14052e-05		Srsf3	9.29866e-248	0.515807	0.945	0.859	1.47998e-243		Nuf2	0	0.47384	0.363	0.001	0
Dusp6	0.132699	0.370221	0.165	0.183	1		Pus1	7.46378e-156	0.515806	0.393	0.23	1.18794e-151		Adk	0	0.473639	0.483	0.059	0
Ssbp2	7.09209e-33	0.369952	0.137	0.088	1.12878e-28		Jund	1.66942e-116	0.515114	0.936	0.923	2.65705e-112		Arhgef1	0	0.472406	0.932	0.391	0
Spata13	0.00108185	0.369927	0.239	0.334	1		Sf3b3	2.08154e-156	0.515024	0.638	0.515	3.31298e-152		Psmc5	0	0.471806	0.876	0.386	0
Arid4a	0.942604	0.369046	0.374	0.521	1		Wdr77	6.63514e-204	0.514419	0.334	0.144	1.05605e-199		Add3	0	0.470253	0.694	0.175	0
mt-Co3	0	0.36543	1	1	0		Polr2f	1.28457e-141	0.514091	0.675	0.572	2.04452e-137		Chaf1b	0	0.469837	0.421	0.017	0
Rasal3	0.542115	0.365234	0.366	0.503	1		Dnmt3a	6.62623e-107	0.513574	0.376	0.247	1.05463e-102		Ndufc1	0	0.469557	0.83	0.291	0
Phf1	3.55813e-25	0.364955	0.134	0.093	5.66313e-21		Arf6	4.14157e-139	0.513101	0.581	0.463	6.59172e-135		Arpc2	0	0.469304	0.999	0.919	0
Ccdc107	0.00442751	0.3648	0.247	0.344	1		Baz1a	3.41606e-98	0.513078	0.582	0.487	5.43701e-94		Ccdc12	0	0.468698	0.956	0.495	0
Irf1	2.28858e-12	0.364536	0.479	0.594	3.6425e-08		Ybx1	5.78448e-281	0.512509	0.978	0.907	9.20658e-277		Prkag1	0	0.467692	0.655	0.111	0
Lims1	0.00501022	0.364517	0.294	0.42	1		Iars	4.75882e-171	0.512145	0.332	0.162	7.57413e-167		Limd2	0	0.466679	0.996	0.733	0
Slc9a3r1	4.79919e-07	0.364501	0.439	0.573	0.00763839		Peli1	2.18269e-93	0.510365	0.532	0.425	3.47397e-89		Cib1	0	0.46636	0.788	0.21	0
Ddrgk1	0.543406	0.364294	0.369	0.516	1		Aebp2	2.39347e-122	0.510239	0.561	0.451	3.80944e-118		Xdh	0	0.465265	0.463	0.03	0
5031425E22Rik	0.729507	0.364183	0.247	0.313	1		Caprin1	2.37193e-146	0.50969	0.643	0.529	3.77517e-142		Uqcrq	0	0.465245	0.949	0.556	0
Zmym5	0.0059828	0.364141	0.215	0.289	1		Fam107b	6.53982e-36	0.509296	0.657	0.678	1.04088e-31		Chmp2a	0	0.46509	0.942	0.484	0
Sun2	0.515894	0.364104	0.239	0.305	1		Nmd3	2.64361e-133	0.508825	0.438	0.3	4.20756e-129		Bin1	0	0.465008	0.774	0.2	0
Ly6c1	5.60984e-105	0.363912	0.113	0.031	8.92862e-101		Nufip1	2.70487e-158	0.508715	0.368	0.205	4.30507e-154		Naa38	0	0.463343	0.657	0.118	0
Abcg1	4.27085e-22	0.36376	0.134	0.097	6.79749e-18		Tardbp	8.66212e-122	0.508097	0.555	0.447	1.37866e-117		Cox7c	0	0.461779	0.991	0.752	0
Dexi	0.00030268	0.363451	0.166	0.17	1		Cct4	3.99757e-189	0.506474	0.837	0.742	6.36253e-185		Minos1	0	0.461329	0.941	0.513	0
Tmem30a	0.0125786	0.363367	0.325	0.472	1		Gart	5.26025e-133	0.50595	0.395	0.251	8.37222e-129		Ntan1	0	0.461109	0.785	0.21	0
Tgoln1	0.792299	0.36295	0.385	0.532	1		Ak6	1.09104e-120	0.504762	0.403	0.276	1.7365e-116		Mrpl52	0	0.460972	0.893	0.394	0
Rpl18a	0	0.362909	1	1	0		2410002F23Rik	2.97613e-193	0.504483	0.333	0.146	4.73681e-189		Vdac1	0	0.460851	0.731	0.216	0
Cd28	2.1656e-27	0.362887	0.579	0.651	3.44677e-23		Crabp2	1.22935e-275	0.504275	0.101	0.001	1.95663e-271		Cox6c	0	0.460614	0.994	0.809	0
Zfp740	0.0114522	0.362868	0.184	0.199	1		Eny2	1.49386e-128	0.503819	0.627	0.539	2.37763e-124		Dpp3	0	0.460422	0.659	0.118	0
Aff4	0.00370389	0.362066	0.207	0.226	1		Smyd5	4.81702e-266	0.500924	0.275	0.079	7.66677e-262		Hist1h4i	0	0.459893	0.45	0.034	0
Aqp9	1.97455e-114	0.36196	0.109	0.027	3.14269e-110		Dot1l	1.66249e-126	0.500829	0.315	0.175	2.64602e-122		Blmh	0	0.459399	0.716	0.18	0
Ppt1	0.17239	0.360871	0.222	0.289	1		Gzma	4.05535e-15	0.500479	0.043	0.081	6.4545e-11		Mns1	0	0.457198	0.459	0.03	0
Cd38	1.22353e-06	0.360807	0.162	0.154	0.0194737		Fam208b	1.8611e-155	0.499509	0.41	0.226	2.96212e-151		Cox7a2	0	0.456832	0.974	0.695	0
Foxp1	0.219779	0.360428	0.383	0.502	1		Pprc1	8.33361e-265	0.497143	0.266	0.073	1.32638e-260		Bag1	0	0.456443	0.929	0.495	0
Lars2	0.0716617	0.36025	0.344	0.493	1		Ankrd17	9.34082e-118	0.497091	0.593	0.482	1.48668e-113		Tma7	0	0.456153	0.993	0.826	0
Dbp	1.39329e-31	0.359659	0.121	0.075	2.21756e-27		Frmd4b	7.40583e-216	0.496541	0.18	0.037	1.17871e-211		Stk38	0	0.455525	0.719	0.188	0
Fbxl12	4.56579e-08	0.35919	0.17	0.161	0.000726691		Phb	1.54218e-129	0.494848	0.414	0.274	2.45453e-125		Vdac3	0	0.453303	0.84	0.337	0
Tnks2	0.000226616	0.358972	0.282	0.409	1		Kdelr2	4.70168e-138	0.494546	0.553	0.426	7.48319e-134		Xrn2	0	0.453082	0.916	0.49	0
Rpl37a	0	0.358604	0.998	0.999	0		Pabpc1	0	0.493988	0.979	0.952	0		Rtn3	0	0.452802	0.767	0.242	0
Tsc22d3	2.83649e-65	0.357698	0.103	0.04	4.51455e-61		Srsf5	1.3857e-247	0.493817	0.907	0.838	2.20548e-243		AI413582	0	0.452561	0.656	0.112	0
Abhd16a	0.106224	0.356579	0.197	0.253	1		Notch1	5.24156e-99	0.493526	0.429	0.31	8.34246e-95		Ndufa3	0	0.452318	0.838	0.287	0
Map3k1	0.0455228	0.356344	0.246	0.331	1		Tlcd1	0	0.49305	0.226	0.031	0		Rpl10a	0	0.452094	1	0.995	0
mt-Cytb	0	0.356272	1	1	0		Zbtb16	2.07358e-75	0.492975	0.55	0.478	3.30031e-71		Acp1	0	0.451819	0.739	0.186	0
1700020I14Rik	0.697897	0.355848	0.384	0.554	1		Maff	0	0.492667	0.204	0.007	0		Edf1	0	0.450724	0.989	0.717	0
Ppm1h	0.0105931	0.355228	0.185	0.201	1		Polr2h	3.03778e-122	0.492062	0.517	0.408	4.83494e-118		Tecr	0	0.450506	0.931	0.416	0
Chmp1b	0.228139	0.354868	0.193	0.223	1		Gsto1	1.5287e-210	0.491887	0.269	0.091	2.43309e-206		Dap3	0	0.450501	0.731	0.187	0
Gpc1	1.07303e-24	0.354271	0.109	0.07	1.70783e-20		Ilf3	3.45532e-116	0.49099	0.377	0.243	5.49948e-112		Ska1	0	0.450111	0.359	0.001	0
Swt1	0.201528	0.353565	0.269	0.356	1		Mfsd14a	2.15597e-135	0.489685	0.459	0.308	3.43145e-131		Cbx3	0	0.449941	0.87	0.432	0
Rtf1	0.00134674	0.353296	0.45	0.628	1		Prrc2c	1.00797e-209	0.48959	0.936	0.876	1.60428e-205		Ift27	0	0.44938	0.623	0.108	0
Zcchc7	0.826904	0.351987	0.362	0.493	1		Spata5	7.57704e-174	0.48899	0.312	0.142	1.20596e-169		Csnk2b	0	0.447596	0.934	0.482	0
Lnpep	0.00582619	0.351925	0.273	0.383	1		Grpel1	1.96732e-157	0.487867	0.7	0.591	3.13119e-153		Serf2	0	0.446777	1	0.937	0
Msl1	0.141066	0.351861	0.226	0.293	1		Eif2b3	3.43036e-160	0.487598	0.302	0.142	5.45976e-156		Mrpl40	0	0.446612	0.686	0.165	0
Rab14	0.012646	0.350893	0.44	0.623	1		Pdcd11	2.31474e-122	0.48604	0.327	0.188	3.68414e-118		Ncaph	0	0.446364	0.333	0.003	0
Smim11	0.00309165	0.350882	0.303	0.441	1		Foxn2	3.59779e-113	0.485931	0.343	0.208	5.72624e-109		Rps26	0	0.445877	1	0.975	0
Ppp4r3b	0.42506	0.350846	0.376	0.54	1		Usp36	3.03253e-181	0.483867	0.296	0.12	4.82657e-177		Mrpl51	0	0.445857	0.864	0.384	0
Tug1	0.795152	0.349692	0.211	0.259	1		Nap1l1	3.25798e-137	0.482811	0.792	0.643	5.1854e-133		Esyt1	0	0.445242	0.762	0.217	0
Pum2	0.0251587	0.349473	0.333	0.478	1		Otud4	5.52893e-135	0.48279	0.373	0.214	8.79984e-131		Hdac1	0	0.445098	0.8	0.266	0
H2-Q7	1.6978e-110	0.349231	0.927	0.972	2.70221e-106		Wdr61	1.50015e-104	0.482396	0.479	0.381	2.38764e-100		Ncapg2	0	0.443481	0.36	0.006	0
Fam172a	0.00568211	0.349128	0.244	0.336	1		Ung	1.4935e-165	0.481226	0.321	0.152	2.37705e-161		Kxd1	0	0.44289	0.8	0.22	0
Myo6	1.09073e-27	0.349113	0.116	0.072	1.736e-23		Ythdf2	6.10598e-105	0.480922	0.44	0.326	9.71827e-101		Cep55	0	0.441486	0.348	0.002	0
Commd8	0.698401	0.348428	0.386	0.536	1		Gls	3.70613e-123	0.480488	0.594	0.482	5.89868e-119		Pigt	0	0.441224	0.597	0.09	0
Rpl23	0	0.348152	1	0.999	0		Ube2e1	1.49795e-130	0.47893	0.562	0.45	2.38414e-126		Ndufs5	0	0.44064	0.909	0.411	0
Cd84	8.25232e-06	0.34802	0.498	0.672	0.131344		Psmd11	1.41366e-126	0.478886	0.667	0.582	2.24998e-122		Eva1b	0	0.440191	0.662	0.146	0
Bcap31	8.7225e-27	0.347979	0.595	0.77	1.38827e-22		Fam210a	8.61792e-204	0.477898	0.277	0.101	1.37163e-199		Aurka	0	0.440154	0.294	0.005	0
Cklf	0.0156805	0.346528	0.325	0.466	1		Adss	2.03433e-110	0.477719	0.637	0.554	3.23785e-106		Cops9	0	0.440103	0.81	0.248	0
Ldhb	0.0133396	0.346521	0.174	0.185	1		Utp20	1.62018e-203	0.477518	0.275	0.098	2.57868e-199		Nmi	0	0.439788	0.837	0.269	0
Cdk5rap3	0.00671232	0.346011	0.316	0.458	1		Samsn1	6.06484e-53	0.477137	0.372	0.293	9.65279e-49		2310001H17Rik	0	0.439757	0.532	0.105	0
Stx16	0.0493258	0.345349	0.273	0.374	1		Arih2	9.44532e-158	0.476732	0.324	0.157	1.50332e-153		Commd3	0	0.439569	0.784	0.212	0
Fgl2	0.0765895	0.345322	0.156	0.191	1		Epcam	0	0.474718	0.18	0.012	0		Ran	7.494e-236	0.439501	0.975	0.779	1.19274e-231
Pla2g16	1.23117e-44	0.34489	0.635	0.725	1.95953e-40		Qk	4.52088e-111	0.47415	0.337	0.201	7.19543e-107		Psmc1	0	0.438427	0.694	0.196	0
Lman2l	1.60562e-24	0.343962	0.138	0.098	2.5555e-20		Sco2	9.24009e-155	0.473586	0.318	0.156	1.47065e-150		Ap2m1	0	0.437797	0.783	0.237	0
Samd9l	0.0157207	0.3435	0.248	0.332	1		Mir17hg	1.94593e-262	0.473147	0.219	0.048	3.09714e-258		Cenpk	0	0.436489	0.383	0.009	0
Hvcn1	0.0215181	0.343432	0.157	0.167	1		Arhgap17	3.51882e-126	0.472384	0.416	0.254	5.60056e-122		Ckap5	0	0.436197	0.511	0.14	0
Zcchc6	0.0167133	0.342161	0.356	0.521	1		Bdp1	5.09859e-97	0.470633	0.425	0.305	8.11492e-93		Mcm2	0	0.436183	0.513	0.126	0
Pitpnc1	0.000175818	0.342124	0.263	0.373	1		Fas	7.20378e-73	0.468696	0.338	0.242	1.14655e-68		2610524H06Rik	0	0.434955	0.529	0.064	0
Crlf3	0.176493	0.34164	0.426	0.595	1		Nars	3.87788e-96	0.467454	0.488	0.397	6.17204e-92		Arl6ip4	0	0.434514	0.76	0.208	0
Neu1	0.00676963	0.341345	0.225	0.303	1		Utp23	7.43466e-101	0.46638	0.37	0.252	1.1833e-96		Pkm	0	0.433878	0.979	0.72	0
Gm37387	0.00619413	0.341151	0.148	0.152	1		Eif3c	5.10479e-162	0.465248	0.857	0.74	8.12478e-158		Gtf2h5	0	0.433871	0.841	0.313	0
Tprgl	0.186006	0.340657	0.421	0.586	1		Cd24a	4.0294e-287	0.464937	0.111	0.002	6.41319e-283		Cenph	0	0.433272	0.373	0.003	0
Rnf13	2.98029e-06	0.340621	0.148	0.14	0.0474343		Tmem248	9.53722e-105	0.464017	0.378	0.256	1.51794e-100		Ndufc2	0	0.432173	0.933	0.502	0
Gramd1a	0.26324	0.340465	0.343	0.478	1		Hnrnpdl	1.61665e-128	0.463839	0.745	0.636	2.57306e-124		Tspan32	0	0.432028	0.924	0.391	0
Galnt12	0.00811988	0.339927	0.196	0.262	1		Ldha	2.01744e-134	0.463009	0.935	0.811	3.21096e-130		Traf3ip3	0	0.43179	0.866	0.288	0
Fam174a	0.913593	0.339447	0.186	0.224	1		Cbfb	3.97746e-104	0.462322	0.476	0.363	6.33053e-100		Gtf3a	0	0.43131	0.713	0.186	0
Ppp3cc	0.401309	0.338363	0.177	0.217	1		Dis3	5.47476e-142	0.462029	0.286	0.14	8.71363e-138		Gnpda1	0	0.431232	0.531	0.062	0
Smarca2	0.180925	0.33823	0.181	0.203	1		Fam133b	8.73728e-97	0.461861	0.462	0.352	1.39063e-92		Sdhd	0	0.431036	0.784	0.264	0
Ralgps2	0.0405041	0.338104	0.151	0.161	1		Rps27l	8.77115e-133	0.461856	0.809	0.694	1.39602e-128		Itpa	0	0.430889	0.644	0.123	0
Phf20l1	0.00864993	0.338073	0.346	0.505	1		Stt3a	6.91644e-98	0.45975	0.45	0.341	1.10082e-93		Erp29	0	0.430181	0.878	0.387	0
Cdk12	0.400388	0.337989	0.378	0.543	1		Gemin5	5.30681e-175	0.458307	0.27	0.107	8.44632e-171		Nap1l1	1.5544e-285	0.429716	0.904	0.533	2.47398e-281
Arid2	0.303593	0.337986	0.17	0.192	1		Aimp2	2.28374e-98	0.4576	0.357	0.244	3.6348e-94		Cbx5	0	0.429582	0.499	0.093	0
Snrnp48	0.559802	0.337944	0.399	0.554	1		Ubald2	2.32627e-61	0.456891	0.575	0.526	3.70249e-57		Glud1	0	0.429428	0.768	0.233	0
Rsbn1	0.0665611	0.337758	0.231	0.303	1		Ppp2r2a	4.20248e-113	0.453528	0.549	0.444	6.68866e-109		Iqgap1	0	0.429421	0.87	0.358	0
Ppm1k	1.98538e-18	0.336904	0.119	0.086	3.15993e-14		Psma7	1.04067e-177	0.453348	0.917	0.828	1.65633e-173		Nt5c3b	0	0.42934	0.642	0.129	0
Slf2	0.844393	0.33682	0.165	0.196	1		Utp6	6.57593e-105	0.452759	0.332	0.206	1.04662e-100		Dcps	0	0.428919	0.671	0.142	0
N4bp2l2	0.957311	0.336724	0.413	0.586	1		Senp6	2.24125e-139	0.452385	0.73	0.647	3.56718e-135		Anapc16	0	0.428695	0.791	0.247	0
Nfatc2	0.0172917	0.336607	0.173	0.224	1		Slc39a6	2.39896e-140	0.45228	0.292	0.139	3.81818e-136		Ckap2l	0	0.428622	0.316	0.002	0
Zufsp	0.00177091	0.336214	0.265	0.367	1		Abcc1	1.44e-210	0.452201	0.263	0.085	2.29191e-206		Rpl35	0	0.428621	0.999	0.922	0
Wls	1.30667e-56	0.335907	0.112	0.05	2.0797e-52		Il6st	1.01708e-169	0.451995	0.207	0.064	1.61878e-165		Zyx	0	0.428017	0.745	0.225	0
Trmt1l	0.0161029	0.335897	0.189	0.246	1		Lcp2	5.48599e-27	0.451194	0.565	0.59	8.7315e-23		Grap	0	0.427328	0.838	0.298	0
Tmem176b	6.7135e-33	0.334971	0.096	0.051	1.06852e-28		Ranbp2	1.92681e-97	0.451156	0.571	0.473	3.06672e-93		Nsmce1	0	0.426723	0.754	0.214	0
Mat2b	0.496562	0.33461	0.387	0.563	1		Rasa2	4.08941e-93	0.451127	0.408	0.281	6.5087e-89		Ppp1r18	0	0.426209	0.9	0.342	0
Kdm5b	2.08753e-05	0.334597	0.216	0.223	0.332251		Gnpnat1	3.48153e-116	0.450377	0.377	0.237	5.54121e-112		Rad51ap1	0	0.426191	0.339	0.002	0
Rps4x	0	0.334414	0.999	1	0		Mettl13	2.26979e-250	0.450017	0.223	0.052	3.6126e-246		Gpsm3	0	0.426102	0.969	0.453	0
Bod1l	0.623594	0.334384	0.444	0.62	1		Lsg1	2.44318e-97	0.448846	0.426	0.318	3.88857e-93		Ckap2	0	0.42603	0.326	0.004	0
Gngt2	7.77215e-05	0.334365	0.153	0.151	1		Serpina3f	4.8878e-08	0.448541	0.181	0.159	0.000777942		Uqcrfs1	0	0.425967	0.924	0.477	0
Rictor	0.00820558	0.334052	0.249	0.335	1		Ywhag	1.85448e-107	0.447725	0.417	0.29	2.9516e-103		Cuta	0	0.42543	0.803	0.255	0
Sp110	0.649191	0.33334	0.36	0.498	1		Impdh2	6.19157e-104	0.447364	0.579	0.462	9.8545e-100		Psmb7	0	0.424588	0.851	0.355	0
Bbx	0.120778	0.333292	0.188	0.21	1		Rrp1	1.50174e-132	0.447164	0.735	0.642	2.39017e-128		Sh3bgrl	0	0.424474	0.554	0.073	0
Gpr34	3.41234e-76	0.332975	0.105	0.037	5.43107e-72		Got1	1.2397e-74	0.446264	0.414	0.327	1.97311e-70		Arhgap11a	0	0.424441	0.35	0.006	0
Pbrm1	0.113401	0.332837	0.436	0.595	1		Sec61a1	1.04795e-81	0.44512	0.473	0.381	1.66792e-77		Ndufb11	0	0.42411	0.981	0.643	0
Fam117a	0.133489	0.331527	0.145	0.157	1		Ruvbl2	8.92104e-91	0.445062	0.369	0.264	1.41987e-86		Mpdu1	0	0.42374	0.615	0.11	0
Slc44a2	0.00119169	0.330681	0.231	0.318	1		Rps19bp1	6.25388e-107	0.444466	0.422	0.303	9.95367e-103		Acads	0	0.423726	0.623	0.108	0
Etv3	0.00750347	0.330649	0.22	0.241	1		Nob1	3.11035e-113	0.443198	0.333	0.197	4.95044e-109		Dpy30	0	0.423071	0.744	0.236	0
Msl2	0.433889	0.329962	0.208	0.245	1		Nol10	4.80925e-128	0.441966	0.274	0.136	7.6544e-124		Gm17018	0	0.422684	0.601	0.1	0
H2afy	1.18911e-36	0.329462	0.666	0.819	1.89258e-32		Mmd	1.16166e-75	0.441419	0.297	0.194	1.84891e-71		Lamtor5	0	0.421283	0.869	0.345	0
Chic2	0.590108	0.329077	0.395	0.564	1		Mrpl50	1.04691e-111	0.440003	0.378	0.249	1.66627e-107		Fdps	0	0.419536	0.532	0.103	0
Itpr3	3.68581e-06	0.328728	0.127	0.116	0.0586633		Tnfsf11	1.25228e-121	0.436954	0.201	0.077	1.99312e-117		Psme1	0	0.419149	0.997	0.818	0
Sntb2	3.07048e-09	0.328279	0.259	0.392	4.88697e-05		Ppp2ca	5.46005e-134	0.434836	0.774	0.708	8.69022e-130		Ybx1	1.07566e-278	0.419016	0.994	0.879	1.71203e-274
Gpr132	0.139485	0.327742	0.243	0.317	1		Usp10	3.50058e-115	0.434629	0.305	0.171	5.57152e-111		Got2	0	0.419012	0.675	0.172	0
Zfp871	0.160782	0.327737	0.188	0.236	1		Kpna1	5.37343e-119	0.434228	0.312	0.17	8.55235e-115		Itgb1bp1	0	0.418919	0.709	0.166	0
Usp48	9.9402e-09	0.327342	0.241	0.36	0.000158208		Eif4g1	9.468e-96	0.432821	0.614	0.52	1.50693e-91		Cdc45	0	0.418478	0.359	0.007	0
Hadhb	0.823055	0.327234	0.384	0.538	1		Rnf19a	1.17238e-112	0.432207	0.264	0.135	1.86597e-108		Flii	0	0.418452	0.668	0.152	0
Cd164	0.0200433	0.326677	0.348	0.5	1		Gtf2f2	8.75355e-93	0.430718	0.366	0.259	1.39321e-88		Eef2	0	0.418179	1	0.943	0
Chd9	0.0337612	0.326477	0.182	0.234	1		Tcof1	1.62291e-79	0.429735	0.523	0.447	2.58303e-75		Ripk3	0	0.41797	0.574	0.09	0
Gata3	0.00655339	0.326412	0.405	0.525	1		Brd2	6.46634e-80	0.428544	0.554	0.476	1.02918e-75		Pnp	0	0.41719	0.686	0.174	0
Fam46c	9.61317e-08	0.326338	0.144	0.13	0.00153003		Hsp90b1	4.6924e-129	0.428123	0.926	0.826	7.46842e-125		Myh9	0	0.416454	0.893	0.41	0
Znrf1	0.0950271	0.326065	0.235	0.307	1		Mdfic	6.91254e-108	0.428118	0.305	0.169	1.1002e-103		Smco4	0	0.416091	0.772	0.292	0
Mark2	7.32388e-05	0.325954	0.329	0.493	1		Ntmt1	1.88306e-120	0.427907	0.295	0.16	2.99708e-116		Psen2	0	0.414791	0.683	0.159	0
Ifnar1	0.00155707	0.325217	0.208	0.281	1		Rangap1	8.429e-86	0.426358	0.493	0.387	1.34156e-81		Sp100	0	0.414687	0.959	0.433	0
Zc3h7a	3.13644e-07	0.325176	0.233	0.341	0.00499195		Rabggtb	2.88763e-79	0.42583	0.341	0.24	4.59595e-75		Plec	0	0.414558	0.484	0.061	0
Srpk2	0.000973169	0.325096	0.295	0.425	1		Tm2d3	1.4391e-83	0.424665	0.43	0.331	2.29046e-79		Zbtb8os	0	0.414501	0.8	0.247	0
Ldb1	2.35299e-05	0.324983	0.253	0.365	0.374501		Relb	5.82403e-117	0.423808	0.471	0.316	9.26953e-113		Dynlrb1	0	0.414464	0.902	0.374	0
Mfap1b	0.842727	0.324977	0.163	0.193	1		Rab8b	5.38456e-55	0.422282	0.538	0.499	8.57007e-51		Lbr	0	0.413249	0.787	0.32	0
Ly6g5b	1.37962e-100	0.324577	0.101	0.026	2.1958e-96		Dennd5a	3.76297e-125	0.421788	0.228	0.097	5.98914e-121		Rtraf	0	0.412932	0.974	0.618	0
Atp6v0a2	3.1078e-08	0.324327	0.23	0.34	0.000494637		Pusl1	2.03046e-158	0.421698	0.238	0.094	3.23167e-154		Cox5a	0	0.411968	0.99	0.825	0
Lef1	0.000463359	0.324319	0.343	0.506	1		Tmem185b	2.94222e-191	0.421092	0.247	0.081	4.68283e-187		Kcnab2	0	0.411774	0.526	0.063	0
Rabgap1l	0.00538399	0.324237	0.35	0.505	1		Mia2	4.89818e-95	0.420852	0.559	0.466	7.79594e-91		Dus2	0	0.411594	0.489	0.067	0
Tcrg-C4	0.00110997	0.324222	0.18	0.181	1		Fes	4.90201e-306	0.420825	0.173	0.019	7.80204e-302		Cwc15	0	0.4106	0.951	0.554	0
Cdyl2	1.85342e-05	0.324171	0.138	0.131	0.29499		Snrpd3	4.14949e-115	0.42072	0.744	0.638	6.60433e-111		Hexb	0	0.409921	0.514	0.06	0
Gbp4	0.538672	0.323377	0.336	0.447	1		Spen	3.33097e-72	0.420062	0.379	0.272	5.30157e-68		Myl12a	1.73493e-295	0.409608	0.983	0.689	2.76131e-291
Helz	8.59693e-08	0.323353	0.235	0.347	0.00136829		Pxdc1	2.52047e-171	0.418464	0.144	0.028	4.01157e-167		Psph	0	0.40887	0.685	0.159	0
Tia1	1.48386e-09	0.323214	0.259	0.392	2.36171e-05		Thumpd1	1.02581e-80	0.41824	0.409	0.31	1.63268e-76		Cox20	0	0.408254	0.742	0.191	0
Pja2	1.48376e-08	0.322995	0.124	0.107	0.000236155		Prpf19	1.12597e-79	0.418109	0.425	0.333	1.79209e-75		Txndc17	0	0.407421	0.902	0.433	0
Fryl	5.55754e-07	0.322875	0.274	0.406	0.00884538		Prps1	9.72252e-77	0.417605	0.323	0.225	1.54744e-72		Ncaph2	0	0.406926	0.596	0.127	0
2610037D02Rik	0.899358	0.322848	0.177	0.21	1		Psme2	1.07098e-132	0.417305	0.939	0.857	1.70457e-128		Ubl5	0	0.406727	0.988	0.709	0
Rbm7	0.000100008	0.322637	0.322	0.482	1		BC005561	8.5128e-114	0.416631	0.319	0.172	1.3549e-109		Fam96a	0	0.406157	0.846	0.337	0
Rap1gds1	0.0915039	0.322368	0.267	0.355	1		Ssr1	1.14451e-84	0.415944	0.603	0.535	1.8216e-80		Nedd8	0	0.405924	0.981	0.68	0
Nr2c2	0.000105614	0.321993	0.199	0.275	1		Rnf126	3.77004e-65	0.414883	0.384	0.308	6.00039e-61		Kif2c	0	0.405852	0.313	0.001	0
Rsf1	9.24534e-07	0.321916	0.301	0.45	0.0147149		Clptm1l	1.16516e-81	0.414645	0.536	0.466	1.85447e-77		Hnrnpd	6.06075e-237	0.4054	0.947	0.674	9.64629e-233
Jakmip1	4.93414e-07	0.321558	0.255	0.377	0.00785318		Ppig	2.24576e-108	0.413895	0.731	0.649	3.57435e-104		Snrpd2	1.38415e-301	0.404958	0.967	0.628	2.20301e-297
Mllt3	4.67771e-07	0.321039	0.234	0.341	0.00744504		Noa1	5.58016e-90	0.411168	0.298	0.183	8.88138e-86		1110008P14Rik	0	0.404745	0.699	0.172	0
Chmp1a	8.40066e-07	0.321014	0.275	0.41	0.0133705		Gm26669	1.63766e-275	0.410859	0.201	0.034	2.60649e-271		Igbp1	0	0.40413	0.802	0.255	0
Trim56	0.00335493	0.320852	0.202	0.268	1		Plagl2	3.90144e-91	0.409957	0.296	0.175	6.20953e-87		Pip4k2a	0	0.403859	0.542	0.076	0
Trappc8	0.778012	0.320817	0.16	0.189	1		Skil	2.73276e-90	0.409708	0.263	0.145	4.34946e-86		Tsc22d4	0	0.403532	0.899	0.357	0
Ubn2	0.0380895	0.320727	0.207	0.267	1		Sde2	4.25706e-89	0.409572	0.436	0.328	6.77554e-85		Mdh2	7.09695e-304	0.403271	0.957	0.615	1.12955e-299
Lasp1	2.03219e-06	0.32057	0.269	0.398	0.0323444		Magohb	8.12887e-80	0.408685	0.36	0.265	1.29379e-75		Nol7	0	0.402053	0.967	0.604	0
Nin	0.262325	0.320429	0.204	0.255	1		1810022K09Rik	2.72843e-86	0.408085	0.541	0.466	4.34257e-82		Nono	0	0.401996	0.906	0.469	0
Marf1	3.33213e-05	0.320119	0.186	0.258	0.530342		Ubfd1	1.5795e-80	0.407416	0.333	0.225	2.51393e-76		Kif20a	0	0.40109	0.319	0.002	0
Mdm4	0.00103834	0.320004	0.266	0.372	1		Rab10	1.72619e-82	0.407211	0.6	0.538	2.7474e-78		Spcs1	0	0.400577	0.904	0.428	0
Clip1	2.30383e-06	0.319898	0.247	0.357	0.0366677		Smyd2	2.73869e-161	0.407187	0.236	0.088	4.3589e-157		Smc3	6.92115e-295	0.398871	0.817	0.422	1.10157e-290
Bfar	6.19811e-06	0.319818	0.254	0.365	0.0986491		Tmem33	3.23449e-63	0.406625	0.373	0.29	5.14802e-59		Coro7	0	0.398411	0.56	0.08	0
Oxr1	0.486623	0.319436	0.163	0.185	1		Clns1a	6.46381e-72	0.405837	0.492	0.428	1.02878e-67		Stk39	0	0.398144	0.58	0.107	0
Leprotl1	1.71232e-26	0.319049	0.615	0.735	2.72532e-22		Cinp	6.21784e-76	0.405255	0.29	0.191	9.89631e-72		Ilk	0	0.398094	0.598	0.097	0
Map4k4	0.667005	0.318898	0.369	0.508	1		Bag5	6.79848e-93	0.404936	0.364	0.24	1.08205e-88		Nabp2	0	0.397987	0.627	0.118	0
Wnk1	9.05686e-05	0.318379	0.498	0.684	1		Csnk2a2	3.79639e-68	0.404787	0.483	0.423	6.04233e-64		Atad5	0	0.397968	0.359	0.02	0
Rlf	0.00368995	0.317702	0.219	0.293	1		Txnl1	1.01099e-118	0.404656	0.722	0.62	1.60909e-114		Carhsp1	0	0.397829	0.477	0.053	0
Hist3h2a	6.42933e-37	0.317451	0.096	0.049	1.02329e-32		Uap1	1.27472e-76	0.404404	0.273	0.174	2.02884e-72		Bub1	0	0.396387	0.319	0.001	0
Dzip1	6.79189e-43	0.317384	0.107	0.054	1.081e-38		Reep3	9.26244e-53	0.403745	0.325	0.25	1.47421e-48		Vrk1	0	0.396124	0.68	0.168	0
Crim1	1.01199e-28	0.317355	0.121	0.076	1.61068e-24		Nom1	2.84421e-68	0.403094	0.4	0.314	4.52684e-64		Rpp21	0	0.396003	0.725	0.198	0
Cdc37l1	3.21513e-05	0.317139	0.243	0.346	0.51172		Ccr5	8.71283e-26	0.402769	0.354	0.309	1.38673e-21		Arl5c	0	0.395424	0.407	0.038	0
Sc5d	0.000145298	0.316845	0.189	0.259	1		Prkar2a	1.65811e-118	0.402529	0.253	0.12	2.63905e-114		D8Ertd738e	0	0.395321	0.975	0.656	0
Fam120b	0.516924	0.315901	0.158	0.189	1		Utp4	7.20645e-138	0.402108	0.262	0.116	1.14698e-133		Plk4	0	0.394923	0.405	0.034	0
Ncoa2	0.00893323	0.315838	0.211	0.278	1		Elavl1	4.51307e-98	0.40182	0.613	0.536	7.183e-94		Tmem234	0	0.393576	0.939	0.445	0
Tnfsf10	0.0167069	0.314809	0.163	0.208	1		Selenoi	8.79452e-76	0.39995	0.301	0.198	1.39974e-71		Tmco1	0	0.392426	0.728	0.194	0
2010300C02Rik	2.27728e-36	0.314738	0.11	0.061	3.62451e-32		Bccip	3.46309e-87	0.398511	0.517	0.431	5.51186e-83		Vasp	3.78453e-277	0.392383	0.967	0.592	6.02345e-273
Gbp9	0.0377463	0.314222	0.2	0.256	1		Sms	3.86657e-69	0.39807	0.609	0.542	6.15404e-65		Ubl4a	0	0.392328	0.739	0.255	0
Fau	0	0.314214	1	0.999	0		Gnl1	2.96912e-70	0.397632	0.408	0.318	4.72566e-66		Smc6	0	0.392304	0.777	0.315	0
Ptp4a2	1.74656e-39	0.314033	0.69	0.868	2.77983e-35		Phb2	8.74451e-94	0.397234	0.772	0.692	1.39178e-89		Mospd3	0	0.391487	0.501	0.052	0
Akr1b10	0.0380148	0.313929	0.149	0.188	1		Tbl1x	1.37093e-66	0.396503	0.441	0.359	2.18198e-62		Psmb6	1.23605e-288	0.391015	0.946	0.578	1.9673e-284
Trat1	2.64604e-20	0.31382	0.187	0.149	4.21144e-16		Heatr3	1.2523e-126	0.396122	0.233	0.102	1.99316e-122		Dhrs1	0	0.390105	0.456	0.036	0
Galnt1	1.03281e-09	0.31357	0.275	0.42	1.64382e-05		Zranb2	6.56377e-76	0.395019	0.594	0.538	1.04469e-71		Dok2	0	0.390056	0.92	0.42	0
Fam26f	9.92674e-45	0.313525	0.109	0.055	1.57994e-40		Utp15	3.50228e-95	0.394961	0.295	0.174	5.57422e-91		Ndufv1	0	0.388702	0.678	0.165	0
Izumo4	0.129245	0.313315	0.146	0.158	1		Trmt10c	9.68256e-99	0.394939	0.396	0.267	1.54108e-94		Cmc2	0	0.388626	0.634	0.176	0
Micall1	5.7964e-12	0.312991	0.128	0.105	9.22555e-08		Tbl3	4.77059e-100	0.394271	0.262	0.14	7.59287e-96		Mrpl28	0	0.387648	0.705	0.219	0
Mirt1	0.00555166	0.312936	0.169	0.219	1		Srrm2	3.68639e-177	0.39417	0.952	0.923	5.86726e-173		Lag3	0	0.387584	0.269	0.002	0
Klhl9	0.528626	0.312709	0.161	0.183	1		Nampt	1.04529e-74	0.394033	0.255	0.155	1.66369e-70		Glmp	0	0.386295	0.709	0.17	0
Hmg20a	0.19101	0.312659	0.146	0.158	1		Pinx1	3.65688e-84	0.393672	0.278	0.168	5.82028e-80		Tomm7	0	0.386116	0.919	0.456	0
March7	1.08529e-07	0.312275	0.3	0.453	0.00172734		Ipo4	9.87085e-212	0.393151	0.199	0.049	1.57104e-207		Psmc2	0	0.38581	0.871	0.406	0
Nt5e	5.16985e-46	0.312271	0.108	0.053	8.22833e-42		Hdlbp	1.21359e-55	0.392977	0.485	0.431	1.93155e-51		Sars	0	0.385714	0.796	0.277	0
Sash3	1.45477e-07	0.3114	0.282	0.424	0.00231542		Hk2	2.06558e-266	0.392699	0.167	0.023	3.28758e-262		Dtl	0	0.384705	0.328	0.018	0
Commd7	0.567306	0.311269	0.375	0.537	1		Surf2	4.55704e-82	0.392415	0.334	0.223	7.25298e-78		Syt11	0	0.384628	0.384	0.026	0
AI504432	0.51604	0.311219	0.184	0.222	1		Mrpl20	9.92686e-98	0.391979	0.747	0.661	1.57996e-93		Ssu72	0	0.383596	0.9	0.421	0
Eif1b	9.25187e-05	0.310999	0.473	0.656	1		Lrrc59	1.34372e-74	0.391822	0.442	0.355	2.13866e-70		Tradd	0	0.382297	0.588	0.103	0
Arf3	0.0065047	0.310741	0.215	0.287	1		Cd83	1.75044e-164	0.39078	0.1	0.012	2.786e-160		Arpc1a	0	0.382141	0.719	0.2	0
Hs3st3b1	9.01234e-40	0.310659	0.13	0.074	1.4344e-35		Plekha3	3.52729e-119	0.390687	0.314	0.168	5.61403e-115		Mrpl4	0	0.380726	0.687	0.167	0
H2-D1	6.53406e-194	0.310435	0.998	0.997	1.03996e-189		Usp31	4.81789e-276	0.390496	0.203	0.036	7.66815e-272		Ppp1cc	6.72922e-305	0.380239	0.923	0.518	1.07102e-300
Zbtb7b	0.0755669	0.310026	0.162	0.202	1		Ccnl1	3.41423e-70	0.390142	0.546	0.474	5.43408e-66		Capn2	0	0.379713	0.513	0.069	0
Rnf38	1.42664e-05	0.309853	0.125	0.115	0.227064		Eif3d	2.69517e-90	0.389745	0.725	0.659	4.28963e-86		Fundc2	0	0.37948	0.804	0.293	0
Sdha	0.120064	0.309792	0.379	0.557	1		Il17f	3.48722e-12	0.389135	0.006	0	5.55025e-08		Ctsd	0	0.379041	0.959	0.488	0
Card6	1.5851e-95	0.30907	0.093	0.023	2.52285e-91		Rcn1	5.1256e-132	0.388555	0.276	0.125	8.1579e-128		Lsm6	1.73401e-303	0.378384	0.88	0.46	2.75985e-299
Cnr2	1.84941e-110	0.308889	0.093	0.019	2.94352e-106		Tnfrsf4	2.62711e-38	0.387886	0.147	0.086	4.18131e-34		Pdzd11	0	0.378198	0.526	0.071	0
Tcrg-C2	0.458662	0.308135	0.203	0.223	1		Eef1d	2.18388e-182	0.38697	0.945	0.914	3.47587e-178		Cdc123	0	0.378039	0.671	0.17	0
Khnyn	0.547001	0.308046	0.144	0.162	1		Mthfd1	4.72517e-81	0.386347	0.262	0.156	7.52059e-77		Slc25a5	7.87989e-307	0.377719	0.994	0.832	1.25416e-302
Brd1	0.00148732	0.307802	0.357	0.526	1		Hdac2	6.00271e-75	0.386259	0.426	0.334	9.55392e-71		Plp2	0	0.377239	0.372	0.011	0
Gcnt2	1.47085e-141	0.307801	0.078	0.006	2.341e-137		Erh	2.61377e-74	0.385992	0.612	0.529	4.16008e-70		Impa2	0	0.3764	0.486	0.051	0
Efhd2	0.609658	0.306963	0.434	0.61	1		Polr3h	1.45988e-94	0.385805	0.242	0.129	2.32354e-90		Ube2n	1.35953e-302	0.376157	0.901	0.465	2.16383e-298
Cd7	0.000905723	0.30684	0.181	0.183	1		Qtrt2	8.07881e-298	0.385399	0.191	0.027	1.28582e-293		Ehmt2	0	0.376085	0.539	0.086	0
Pdcd6ip	0.256703	0.30551	0.4	0.589	1		Pes1	7.81307e-76	0.38522	0.313	0.211	1.24353e-71		Rnpep	0	0.375479	0.635	0.13	0
H2-M3	6.32854e-10	0.305411	0.259	0.396	1.00725e-05		Ube2g1	5.66603e-88	0.385061	0.378	0.256	9.01805e-84		Mbd2	0	0.375274	0.921	0.448	0
Fam160a2	8.32475e-23	0.30532	0.101	0.065	1.32497e-18		Adipor2	1.6668e-50	0.384468	0.404	0.339	2.65288e-46		Casp3	0	0.374536	0.45	0.048	0
Slc16a6	3.62162e-06	0.30459	0.22	0.312	0.0576418		Itgav	1.85391e-42	0.38423	0.22	0.147	2.95068e-38		Raf1	0	0.374317	0.67	0.194	0
Fkbp3	1.45273e-25	0.304446	0.64	0.786	2.31216e-21		Zfp706	1.49835e-92	0.384115	0.737	0.676	2.38478e-88		Hist1h3c	0	0.373997	0.278	0.001	0
Atp6v0e	3.17915e-47	0.3044	0.71	0.838	5.05994e-43		Tnfrsf18	6.69415e-15	0.384017	0.58	0.644	1.06544e-10		Nfu1	0	0.373688	0.646	0.142	0
Phf14	4.70927e-05	0.303896	0.315	0.468	0.749528		Sigmar1	5.29644e-102	0.383912	0.258	0.135	8.42982e-98		Krtcap2	2.67285e-258	0.37311	0.958	0.65	4.25411e-254
Armc7	0.13124	0.303859	0.131	0.139	1		Tmem64	3.23855e-88	0.383722	0.322	0.187	5.15447e-84		Gzma	7.85771e-165	0.372336	0.14	0.026	1.25063e-160
Arpc5l	2.23687e-14	0.303583	0.538	0.683	3.5602e-10		Nle1	1.98932e-130	0.383552	0.218	0.088	3.1662e-126		Reep4	0	0.37074	0.409	0.054	0
Gm9493	0.00183355	0.303166	0.313	0.451	1		Rwdd4a	6.03391e-61	0.383275	0.381	0.304	9.60358e-57		Lbhd2	0	0.370661	0.286	0.001	0
Creb1	1.36139e-13	0.303159	0.258	0.4	2.16679e-09		Ube2a	2.50868e-55	0.382904	0.559	0.523	3.99282e-51		Fgfr1op2	0	0.370474	0.871	0.368	0
Foxo3	0.000609584	0.302981	0.132	0.128	1		Ptp4a1	2.28429e-92	0.381753	0.325	0.198	3.63567e-88		Vcp	9.73702e-278	0.370459	0.914	0.505	1.54974e-273
Atp8a1	0.594961	0.302879	0.163	0.185	1		Sh3gl3	1.36916e-155	0.381727	0.199	0.064	2.17915e-151		Cdca2	0	0.37035	0.285	0.004	0
Supt20	1.44637e-12	0.302841	0.249	0.387	2.30204e-08		Rock2	3.23937e-51	0.380938	0.384	0.314	5.15578e-47		Ighm	0	0.37032	0.821	0.36	0
Rnf146	0.00239674	0.302758	0.201	0.27	1		Rae1	8.88991e-70	0.38072	0.526	0.469	1.41492e-65		Ndufa7	0	0.369905	0.944	0.472	0
Ero1l	0.0198691	0.302641	0.287	0.388	1		Jagn1	3.34636e-69	0.380463	0.385	0.291	5.32607e-65		Atp5h	0	0.36975	0.999	0.918	0
Rpl26	0	0.301945	0.999	0.999	0		Tmed2	2.3289e-116	0.379925	0.855	0.788	3.70668e-112		Yeats4	0	0.369661	0.804	0.291	0
Vav3	0.55802	0.30181	0.166	0.197	1		Polr1d	1.13235e-132	0.379691	0.92	0.849	1.80225e-128		Clta	0	0.368895	0.988	0.719	0
Sit1	2.27477e-08	0.301124	0.186	0.269	0.000362053		Rbm8a	2.74242e-98	0.379305	0.73	0.647	4.36484e-94		Sgo1	0	0.36779	0.305	0.002	0
Sbds	8.45055e-09	0.301124	0.308	0.477	0.000134499		Tnfsf9	2.62877e-130	0.378957	0.11	0.022	4.18396e-126		Med10	0	0.367659	0.824	0.286	0
H2-Ke6	2.27552e-05	0.301031	0.222	0.311	0.362172		Pwp2	1.31132e-189	0.378874	0.212	0.061	2.0871e-185		Dck	0	0.367316	0.408	0.031	0
Ube2r2	1.15907e-08	0.300825	0.308	0.474	0.000184477		Pebp1	2.1686e-107	0.378515	0.796	0.724	3.45154e-103		Ccdc124	0	0.367053	0.753	0.249	0
Nfatc3	6.11113e-07	0.300731	0.314	0.472	0.00972647		Slc4a7	8.93943e-56	0.377222	0.32	0.234	1.4228e-51		Gstt2	0	0.366551	0.478	0.064	0
Sdhaf4	5.58209e-08	0.300552	0.215	0.315	0.000888445		Kpnb1	8.0481e-60	0.37676	0.479	0.411	1.28094e-55		Xaf1	0	0.365886	0.55	0.109	0
Csnk1g1	0.0137612	0.300406	0.188	0.244	1		Usmg5	3.33256e-76	0.376676	0.624	0.566	5.30411e-72		Lamtor1	0	0.365641	0.857	0.323	0
R3hdm1	0.00695106	0.300292	0.364	0.523	1		Rbm28	7.61902e-65	0.376551	0.475	0.406	1.21264e-60		Sugt1	0	0.365094	0.852	0.335	0
Sla2	1.23574e-05	0.300053	0.176	0.245	0.196681		Rps17	9.0644e-198	0.376396	0.982	0.951	1.44269e-193		Gramd3	0	0.364499	0.715	0.222	0
Iscu	7.45273e-09	0.299523	0.292	0.448	0.000118618		Sub1	6.4064e-54	0.376295	0.975	0.966	1.01964e-49		Cd2bp2	0	0.36437	0.718	0.225	0
Dmtf1	0.00318392	0.298529	0.215	0.287	1		Dnajc11	3.91273e-85	0.376031	0.28	0.167	6.22751e-81		Surf1	0	0.363299	0.605	0.123	0
Spin2c	6.18156e-33	0.298195	0.105	0.059	9.83857e-29		Mydgf	3.94685e-62	0.375376	0.544	0.498	6.28181e-58		Pold4	0	0.362684	0.705	0.18	0
Tyk2	0.517097	0.2979	0.17	0.204	1		Ppip5k2	1.34396e-58	0.375201	0.289	0.201	2.13905e-54		Hist1h2bj	0	0.362451	0.305	0.005	0
Herc4	0.000750599	0.297569	0.171	0.228	1		Chd7	7.60828e-34	0.372893	0.404	0.363	1.21093e-29		Ncf4	0	0.362183	0.727	0.197	0
Fam8a1	0.630574	0.297333	0.135	0.151	1		Huwe1	3.7152e-60	0.371991	0.478	0.408	5.91311e-56		Taok3	0	0.361934	0.73	0.203	0
Zfp68	0.000300921	0.297203	0.165	0.222	1		Wdr55	2.20572e-58	0.371042	0.297	0.215	3.51062e-54		Anxa11	0	0.361868	0.58	0.102	0
Emsy	9.01656e-08	0.297009	0.188	0.269	0.00143508		Hmgn1	9.93432e-52	0.369266	0.55	0.484	1.58115e-47		Bsg	4.12965e-282	0.360791	0.902	0.472	6.57275e-278
Akirin1	3.7068e-07	0.296721	0.315	0.48	0.00589974		Tmem38b	1.52394e-133	0.369238	0.219	0.085	2.42551e-129		Smarcb1	0	0.360501	0.608	0.132	0
Uba7	0.521182	0.296685	0.152	0.181	1		Ftl1	1.1441e-152	0.368287	0.982	0.962	1.82095e-148		Phf5a	0	0.360035	0.865	0.412	0
Hbp1	0.0107669	0.296482	0.136	0.138	1		Nol9	2.57194e-91	0.36766	0.26	0.144	4.09349e-87		Cmas	0	0.360016	0.646	0.158	0
Npc1	7.14218e-08	0.296133	0.117	0.1	0.00113675		Noct	3.69244e-184	0.365009	0.181	0.046	5.87689e-180		Paics	0	0.359363	0.664	0.22	0
Usp25	8.51243e-09	0.295873	0.299	0.456	0.000135484		Bcor	5.72137e-44	0.364768	0.341	0.267	9.10614e-40		Timp2	0	0.357252	0.516	0.107	0
Cep350	6.18042e-10	0.295784	0.219	0.327	9.83675e-06		Hyou1	2.90168e-73	0.364751	0.248	0.146	4.61832e-69		Snrpa	0	0.356698	0.737	0.258	0
Rps13	0	0.295653	1	0.999	0		Fxr1	1.39478e-65	0.364406	0.498	0.428	2.21994e-61		Ccdc50	0	0.356529	0.679	0.196	0
Tmem128	0.0979803	0.295601	0.399	0.595	1		Pak1ip1	6.57945e-64	0.364392	0.526	0.471	1.04718e-59		Cd28	0	0.356475	0.926	0.428	0
Gbp8	0.876772	0.295565	0.177	0.205	1		Kmt5a	4.87716e-57	0.364029	0.48	0.406	7.76249e-53		Sipa1	0	0.356033	0.804	0.244	0
Gm20069	0.238603	0.295386	0.18	0.221	1		Rrp7a	3.8235e-59	0.363859	0.403	0.328	6.08548e-55		Rsu1	0	0.3554	0.601	0.126	0
Rfx7	2.8137e-08	0.294849	0.243	0.356	0.000447828		Prmt3	1.32481e-76	0.36377	0.3	0.19	2.10857e-72		Dnajc7	0	0.354753	0.846	0.337	0
Kmt2a	1.16224e-05	0.294669	0.347	0.521	0.184982		Farsa	3.46332e-56	0.363197	0.409	0.343	5.51221e-52		Shkbp1	0	0.354706	0.552	0.089	0
Kctd2	0.318646	0.294526	0.145	0.175	1		Fkbp1a	6.32508e-73	0.361205	0.722	0.658	1.0067e-68		Cyb561d2	0	0.354172	0.571	0.103	0
Inpp5d	3.25693e-09	0.294296	0.229	0.34	5.18373e-05		Trac	2.64408e-114	0.360562	0.95	0.931	4.20832e-110		Triobp	0	0.353066	0.547	0.09	0
Mau2	3.51918e-07	0.294086	0.218	0.312	0.00560113		Asf1a	6.67506e-23	0.358181	0.338	0.315	1.0624e-18		Lgals9	0	0.352504	0.635	0.135	0
Chst15	8.20396e-56	0.294077	0.103	0.044	1.30574e-51		Gpr183	1.09011e-16	0.358117	0.133	0.094	1.73502e-12		E2f8	0	0.352084	0.283	0.001	0
Fam173a	0.962171	0.293648	0.409	0.576	1		Tes	1.11116e-40	0.358053	0.549	0.531	1.76852e-36		H2-T22	0	0.352081	0.886	0.373	0
Senp7	3.37483e-09	0.293156	0.202	0.296	5.37137e-05		Rraga	5.33698e-55	0.358007	0.402	0.331	8.49434e-51		Adap1	0	0.351662	0.356	0.009	0
Mfsd10	8.28439e-14	0.293045	0.268	0.42	1.31854e-09		Abhd17c	1.20692e-60	0.357802	0.297	0.201	1.92094e-56		Pafah1b3	0	0.351541	0.465	0.055	0
Zmym2	0.00105841	0.292858	0.131	0.128	1		Ago2	5.04376e-60	0.357795	0.491	0.42	8.02765e-56		Atp5d	4.90894e-298	0.351481	0.994	0.788	7.81306e-294
Zmiz1	1.36675e-08	0.292739	0.264	0.396	0.000217531		Tmem11	1.3389e-55	0.357356	0.343	0.266	2.131e-51		Parp1	0	0.35105	0.559	0.147	0
Galnt6	5.21535e-06	0.292633	0.182	0.253	0.0830075		Api5	8.88757e-52	0.356073	0.45	0.4	1.41455e-47		Dazap1	0	0.351015	0.809	0.341	0
Hint2	1.04326e-11	0.292514	0.221	0.336	1.66046e-07		Pisd	1.47039e-159	0.355853	0.202	0.066	2.34027e-155		Tmem256	0	0.350655	0.654	0.169	0
Lppos	0.657068	0.292432	0.142	0.161	1		Grasp	8.25984e-160	0.354968	0.191	0.057	1.31464e-155		Tuba1c	1.23087e-250	0.35063	0.48	0.192	1.95905e-246
Ly9	2.61976e-09	0.292306	0.284	0.434	4.16962e-05		Hnrnpa1	4.94247e-95	0.354662	0.872	0.788	7.86643e-91		Erg28	0	0.350159	0.749	0.242	0
Zdhhc20	8.1976e-09	0.292231	0.25	0.372	0.000130473		Cd320	4.01346e-117	0.354013	0.22	0.096	6.38782e-113		Plek	0	0.35003	0.312	0.015	0
Smg1	5.00801e-06	0.292046	0.283	0.411	0.0797075		Snhg12	1.7913e-84	0.352616	0.381	0.249	2.85104e-80		Lbh	0	0.349042	0.831	0.33	0
Psd4	0.000466472	0.291983	0.194	0.262	1		Eif2s3x	3.73954e-58	0.35211	0.363	0.279	5.95185e-54		C1d	0	0.349027	0.768	0.239	0
Mga	0.0189508	0.291846	0.231	0.301	1		Metap2	5.1977e-71	0.351845	0.648	0.566	8.27267e-67		Chmp4b	9.55123e-297	0.349025	0.914	0.457	1.52017e-292
Coq10b	0.0399476	0.291747	0.216	0.278	1		Vps37a	7.37416e-79	0.351228	0.277	0.167	1.17367e-74		Dctn2	0	0.348906	0.72	0.188	0
Egln1	9.2356e-05	0.291612	0.314	0.465	1		Btaf1	5.85744e-50	0.350347	0.273	0.195	9.32269e-46		Psma2	7.27829e-279	0.348848	0.991	0.795	1.15841e-274
Btbd7	0.0417484	0.291012	0.172	0.218	1		Rpp14	1.00571e-65	0.349724	0.299	0.204	1.60069e-61		Iqgap2	0	0.348192	0.568	0.132	0
Rprd2	9.95057e-05	0.290802	0.184	0.25	1		Psmd7	3.3009e-61	0.349352	0.659	0.611	5.25372e-57		Sra1	0	0.347613	0.833	0.324	0
Elf2	6.05724e-08	0.290679	0.233	0.341	0.00096407		Utp11	3.73161e-64	0.348948	0.575	0.529	5.93924e-60		Dhrs4	0	0.347423	0.497	0.069	0
Filip1l	4.40176e-15	0.290554	0.116	0.086	7.00584e-11		Arglu1	3.2886e-81	0.347527	0.747	0.697	5.23414e-77		Bex3	0	0.347302	0.689	0.194	0
Uvssa	0.049973	0.290284	0.118	0.12	1		Zfp106	1.66891e-41	0.347071	0.38	0.324	2.65623e-37		Atp1b3	2.87788e-279	0.346956	0.84	0.414	4.58043e-275
Syf2	1.91692e-08	0.290069	0.523	0.701	0.000305097		1810032O08Rik	4.7945e-104	0.346504	0.217	0.099	7.63093e-100		Pcna	7.82468e-230	0.346747	0.565	0.262	1.24538e-225
Fam32a	0.0837091	0.289994	0.411	0.611	1		Csnk1d	6.91925e-53	0.344275	0.415	0.349	1.10127e-48		Abhd17a	0	0.346737	0.842	0.31	0
Mia3	5.67705e-11	0.289413	0.221	0.333	9.0356e-07		Ubqln1	1.54267e-60	0.344038	0.312	0.22	2.45532e-56		Sys1	0	0.346515	0.898	0.384	0
Fam160b1	0.0869549	0.289286	0.145	0.178	1		Zfp330	9.81639e-44	0.343986	0.395	0.346	1.56238e-39		Sirt2	0	0.346404	0.664	0.173	0
Zcchc18	6.64258e-07	0.288803	0.154	0.215	0.0105723		Hivep2	1.63403e-40	0.343522	0.432	0.378	2.60071e-36		Tfdp1	0	0.346381	0.541	0.136	0
Csde1	0.277306	0.288527	0.465	0.664	1		Prpf31	2.34981e-46	0.34236	0.414	0.361	3.73995e-42		Lsm3	2.4414e-280	0.346169	0.743	0.353	3.88574e-276
Susd6	0.776984	0.288501	0.15	0.17	1		Nfatc1	1.5366e-22	0.342206	0.414	0.4	2.44566e-18		Qars	0	0.345617	0.624	0.14	0
Ddx60	2.28207e-40	0.288303	0.097	0.048	3.63214e-36		Pom121	1.0996e-45	0.341153	0.317	0.246	1.75012e-41		Suclg1	1.31996e-295	0.345088	0.89	0.431	2.10085e-291
Hnrnph1	0.320862	0.28746	0.409	0.588	1		Rexo2	2.22611e-40	0.341067	0.551	0.519	3.54308e-36		St3gal6	0	0.344457	0.735	0.221	0
Ddit4	0.475624	0.287366	0.172	0.205	1		Cd44	7.0513e-11	0.338328	0.511	0.559	1.12228e-06		Selplg	1.06123e-259	0.344153	0.958	0.548	1.68905e-255
Ppil4	1.04776e-10	0.287105	0.304	0.477	1.66761e-06		Tob2	1.29373e-59	0.337508	0.35	0.244	2.0591e-55		Acot9	0	0.344048	0.469	0.061	0
Sat1	4.02053e-11	0.287065	0.291	0.448	6.39907e-07		Lman2	5.05325e-76	0.336462	0.733	0.669	8.04275e-72		Psmd2	0	0.343224	0.788	0.325	0
Rasa1	5.76536e-08	0.286958	0.29	0.43	0.000917615		Mafk	3.38036e-129	0.335665	0.207	0.079	5.38017e-125		Tmbim6	6.46453e-265	0.34315	0.97	0.617	1.02889e-260
Acss2	2.17468e-10	0.286074	0.106	0.084	3.46122e-06		Txnrd3	0	0.332543	0.155	0.01	0		Neil3	0	0.343008	0.284	0.001	0
Tmem230	0.0637274	0.286057	0.16	0.201	1		Calr	1.4065e-104	0.332275	0.953	0.884	2.23858e-100		Pola1	0	0.342963	0.364	0.027	0
Slc25a36	0.81602	0.286011	0.177	0.204	1		Ddx56	5.39021e-57	0.331058	0.263	0.176	8.57906e-53		Dctn3	0	0.341029	0.883	0.4	0
Prdx6	6.95806e-18	0.28571	0.601	0.804	1.10744e-13		Prdx6	2.39616e-85	0.330763	0.762	0.723	3.81373e-81		Izumo1r	0	0.340337	0.594	0.204	0
Kdm5d	0.473403	0.285658	0.145	0.171	1		Nup54	1.61494e-40	0.329946	0.322	0.263	2.57033e-36		Ndufa9	0	0.339773	0.752	0.24	0
Gse1	0.396879	0.285318	0.137	0.162	1		Selenos	2.56297e-54	0.329426	0.642	0.593	4.07923e-50		Wdr76	0	0.339601	0.409	0.045	0
Akap9	1.39025e-08	0.285165	0.308	0.462	0.000221272		Arl1	1.63357e-47	0.329322	0.529	0.499	2.59999e-43		Tcf19	0	0.339451	0.303	0.007	0
Epb41	1.00874e-07	0.285021	0.209	0.3	0.00160551		Bop1	4.96291e-42	0.328975	0.289	0.225	7.89897e-38		Ndufa1	0	0.339157	0.88	0.402	0
Tnrc6a	5.23142e-12	0.284575	0.259	0.4	8.32633e-08		Cd274	1.56596e-78	0.328358	0.176	0.08	2.49239e-74		Fzr1	0	0.339073	0.43	0.063	0
Ankrd11	7.44432e-17	0.284543	0.671	0.852	1.18484e-12		Siah2	4.48621e-104	0.328235	0.209	0.092	7.14025e-100		Lpxn	0	0.338591	0.721	0.193	0
Ahcyl2	0.275494	0.284441	0.382	0.493	1		Usp16	3.05378e-37	0.327328	0.37	0.318	4.86039e-33		Capn1	0	0.338116	0.575	0.111	0
Herpud2	0.137216	0.284273	0.158	0.194	1		Fosb	2.57072e-156	0.3269	0.22	0.068	4.09155e-152		Sec11a	1.39748e-249	0.337771	0.943	0.539	2.22423e-245
Tmem135	3.33379e-13	0.284257	0.114	0.088	5.30606e-09		Ccdc59	1.40205e-47	0.326859	0.529	0.5	2.2315e-43		Sp140	0	0.337569	0.553	0.099	0
Gatad2b	3.12491e-14	0.284041	0.248	0.388	4.97361e-10		Rbm34	6.12209e-43	0.325593	0.336	0.272	9.74391e-39		Pdap1	0	0.337562	0.813	0.373	1.42851e-303
Cnot4	1.43868e-06	0.284	0.27	0.391	0.0228981		Lsm12	1.50471e-55	0.325362	0.64	0.6	2.3949e-51		Psma6	5.78239e-245	0.337552	0.912	0.491	9.20325e-241
Faah	8.05293e-11	0.283922	0.229	0.346	1.2817e-06		Zfp281	4.86653e-60	0.325328	0.28	0.182	7.74557e-56		Smap2	0	0.337207	0.78	0.259	0
Gpbp1l1	4.33763e-13	0.283826	0.251	0.39	6.90378e-09		Abcf1	5.00741e-55	0.324852	0.644	0.593	7.96979e-51		Akna	0	0.336972	0.576	0.107	0
Ate1	1.61797e-08	0.283808	0.202	0.295	0.000257516		St13	1.11897e-32	0.324656	0.596	0.582	1.78095e-28		Acot7	0	0.336961	0.689	0.209	0
Sp3	6.49758e-12	0.283624	0.283	0.443	1.03415e-07		Aasdhppt	4.39115e-52	0.323927	0.305	0.223	6.98895e-48		Micu2	0	0.336811	0.587	0.113	0
Stat1	6.1462e-05	0.283494	0.529	0.639	0.97823		Hnrnpa2b1	3.1487e-124	0.323672	0.966	0.915	5.01147e-120		Arrb2	0	0.336744	0.591	0.114	0
Fbxl20	1.18611e-13	0.283263	0.11	0.083	1.88781e-09		Tgif2	1.23053e-171	0.323549	0.174	0.044	1.95851e-167		Trbc2	3.36239e-197	0.336647	1	0.961	5.35158e-193
mt-Atp8	2.2627e-09	0.283245	0.314	0.486	3.60132e-05		Morc2a	4.80632e-103	0.323529	0.194	0.081	7.64974e-99		Snrpg	8.33078e-272	0.336241	0.891	0.467	1.32593e-267
Sf3b1	7.7977e-34	0.283071	0.741	0.888	1.24108e-29		Ppp1r15a	1.4766e-109	0.323255	0.348	0.178	2.35016e-105		Eif3i	4.19303e-229	0.336069	0.985	0.688	6.67363e-225
Ccdc82	3.00179e-11	0.283041	0.181	0.271	4.77765e-07		Mpzl3	1.32239e-52	0.322779	0.198	0.117	2.10472e-48		Haspin	0	0.335832	0.409	0.04	0
Macf1	0.0175454	0.283015	0.408	0.594	1		Rpn1	4.55291e-37	0.322743	0.456	0.419	7.24642e-33		Mrps23	0	0.335792	0.79	0.27	0
Sppl2a	1.02626e-17	0.283004	0.229	0.366	1.6334e-13		Chchd2	1.76803e-138	0.322125	0.979	0.965	2.814e-134		Vps36	0	0.335632	0.734	0.25	0
Fbxo9	1.92523e-08	0.282988	0.17	0.246	0.00030642		Yars2	9.41396e-68	0.322084	0.232	0.137	1.49833e-63		Sae1	0	0.335602	0.67	0.217	0
Kat6a	8.97438e-14	0.282911	0.222	0.343	1.42836e-09		Ksr1	2.28257e-69	0.321478	0.22	0.123	3.63294e-65		Anxa7	0	0.334891	0.551	0.114	0
Pkn2	1.197e-12	0.282909	0.295	0.467	1.90515e-08		Endog	5.2002e-39	0.321234	0.27	0.204	8.27663e-35		Trim59	0	0.334649	0.369	0.027	0
Parp14	2.81538e-05	0.28255	0.31	0.444	0.448096		Nedd9	6.98855e-38	0.320658	0.465	0.404	1.1123e-33		Atp6v1d	0	0.334154	0.722	0.199	0
Ggps1	1.07611e-05	0.282361	0.183	0.253	0.171274		Srfbp1	4.38329e-76	0.320062	0.211	0.112	6.97644e-72		Anapc11	0	0.33409	0.686	0.188	0
Eef1a1	0	0.281932	1	1	0		Clpp	3.39253e-40	0.318887	0.332	0.271	5.39955e-36		Cops5	0	0.333547	0.77	0.274	0
Prkx	0.0264542	0.281917	0.135	0.139	1		Urb1	1.77266e-129	0.318702	0.179	0.061	2.82137e-125		Anapc13	0	0.333541	0.631	0.137	0
Rreb1	1.1665e-09	0.281051	0.119	0.098	1.8566e-05		Nufip2	7.77659e-69	0.31859	0.534	0.442	1.23772e-64		Yipf1	0	0.333246	0.634	0.135	0
Adgrg5	5.51977e-67	0.280851	0.092	0.031	8.78527e-63		H13	2.88323e-47	0.31835	0.565	0.534	4.58896e-43		Snrnp25	0	0.333233	0.563	0.101	0
Rnf187	0.145807	0.280844	0.396	0.573	1		Trib1	1.19475e-148	0.318227	0.132	0.029	1.90156e-144		Unc119	0	0.333159	0.722	0.208	0
Dcaf5	0.492983	0.28066	0.138	0.163	1		Rrp8	4.94411e-52	0.317815	0.259	0.178	7.86904e-48		Spdl1	0	0.333015	0.298	0.007	0
Slc28a2	0.425233	0.280518	0.139	0.165	1		Dhx33	8.83059e-153	0.317783	0.169	0.047	1.40548e-148		Cntrl	0	0.332991	0.76	0.267	0
4732440D04Rik	0.0763034	0.280459	0.128	0.133	1		Kpna3	3.14283e-37	0.31751	0.308	0.251	5.00213e-33		Tpr	6.21134e-214	0.332517	0.982	0.766	9.88597e-210
Thap2	9.72362e-05	0.280324	0.157	0.211	1		Rgs16	1.8907e-105	0.316902	0.094	0.02	3.00924e-101		Plekhj1	0	0.332509	0.84	0.351	0
Sgpp1	0.193497	0.279474	0.14	0.169	1		Il4ra	1.37013e-74	0.316404	0.232	0.124	2.1807e-70		Fxn	0	0.332327	0.462	0.065	0
Maf1	5.99812e-18	0.279383	0.247	0.401	9.54661e-14		Mrpl3	5.58406e-35	0.316092	0.352	0.307	8.88759e-31		Nelfe	0	0.331621	0.47	0.085	0
Rrm2b	0.110393	0.278791	0.113	0.117	1		Matr3	3.94854e-67	0.315929	0.654	0.613	6.2845e-63		Depdc1a	0	0.331505	0.281	0.001	0
Gm26917	2.35539e-10	0.278786	0.552	0.684	3.74884e-06		Zeb1	4.22782e-33	0.315644	0.335	0.269	6.72899e-29		Ncapd3	0	0.331471	0.462	0.092	0
Frmd8	2.93333e-15	0.278569	0.21	0.331	4.66869e-11		Rbm17	1.2369e-38	0.315581	0.504	0.48	1.96865e-34		Arhgap45	0	0.331374	0.967	0.463	0
Kat6b	4.98109e-09	0.278456	0.115	0.095	7.9279e-05		Mrps28	2.67551e-41	0.314371	0.4	0.345	4.25834e-37		Arl2bp	0	0.330669	0.751	0.222	0
Ppp6r3	1.24812e-10	0.278281	0.218	0.326	1.9865e-06		2700038G22Rik	1.46211e-78	0.314268	0.193	0.096	2.3271e-74		Nsmce2	0	0.330279	0.598	0.133	0
Fcho2	0.0217267	0.277936	0.161	0.205	1		Atad1	2.40082e-46	0.31311	0.339	0.267	3.82115e-42		H3f3b	6.02351e-287	0.330224	1	0.985	9.58701e-283
Rsrc1	4.75327e-14	0.277873	0.238	0.371	7.5653e-10		Pop1	7.67737e-69	0.313008	0.188	0.097	1.22193e-64		Mpst	0	0.328391	0.495	0.072	0
Rnasel	2.10847e-08	0.277735	0.171	0.246	0.000335585		Itk	5.67874e-23	0.312264	0.552	0.558	9.03829e-19		Tubg1	0	0.328055	0.413	0.043	0
Pdha1	3.07467e-11	0.277698	0.302	0.474	4.89364e-07		Smarcc1	7.15395e-37	0.3119	0.487	0.433	1.13862e-32		Zmat5	0	0.328028	0.699	0.179	0
Tmem131l	2.23785e-09	0.277567	0.22	0.323	3.56176e-05		Qtrt1	3.23348e-77	0.311122	0.196	0.098	5.14641e-73		Pih1d1	0	0.327658	0.535	0.098	0
Lonp2	6.14949e-12	0.277363	0.214	0.324	9.78752e-08		Chordc1	2.47448e-28	0.311048	0.484	0.471	3.93839e-24		Rtf2	0	0.327083	0.762	0.245	0
Hnrnph3	2.07814e-11	0.277205	0.199	0.299	3.30756e-07		Tmed10	1.00704e-57	0.31052	0.67	0.619	1.60281e-53		Fam92a	0	0.326029	0.49	0.074	0
Trim26	7.45965e-13	0.277085	0.208	0.318	1.18728e-08		Rrp12	1.30138e-111	0.309716	0.156	0.053	2.07127e-107		Was	0	0.32511	0.813	0.278	0
Themis	0.000281394	0.276686	0.28	0.389	1		Nomo1	2.44156e-59	0.307926	0.209	0.123	3.88599e-55		Cd9	0	0.324997	0.56	0.161	0
Zfp398	0.003006	0.276467	0.162	0.21	1		Srprb	1.05333e-56	0.30772	0.215	0.129	1.67648e-52		Ywhab	8.68808e-226	0.324772	0.946	0.59	1.3828e-221
Nfe2l2	0.0228172	0.276133	0.167	0.211	1		U2surp	5.39117e-46	0.306665	0.604	0.568	8.58058e-42		Psmd14	0	0.324563	0.817	0.36	0
Smg6	3.0533e-15	0.275907	0.251	0.398	4.85964e-11		Picalm	8.11248e-32	0.305769	0.477	0.446	1.29118e-27		Dynlt1f	0	0.32446	0.446	0.049	0
Ankrd10	6.85499e-08	0.275781	0.241	0.352	0.00109104		Ikbkap	1.00747e-82	0.304954	0.208	0.103	1.60349e-78		Ccdc28b	0	0.324451	0.338	0.017	0
Ppp3cb	6.55356e-14	0.2757	0.241	0.377	1.04306e-09		Bcat1	4.1759e-214	0.304697	0.137	0.019	6.64637e-210		Gins4	0	0.324007	0.542	0.105	0
Rsrc2	0.564179	0.27523	0.483	0.701	1		Ndfip2	2.98408e-29	0.304548	0.393	0.356	4.74946e-25		Scamp3	0	0.323835	0.764	0.244	0
Pan3	1.76842e-05	0.274924	0.195	0.268	0.281461		Wdr5	5.5124e-33	0.304218	0.23	0.174	8.77354e-29		Lrp10	0	0.323807	0.785	0.261	0
Calhm2	0.554701	0.274797	0.119	0.137	1		Qdpr	1.19949e-37	0.304098	0.319	0.257	1.9091e-33		Ppdpf	0	0.323003	0.836	0.335	0
Mob1a	3.11203e-09	0.274695	0.31	0.476	4.9531e-05		Atp5b	1.84669e-103	0.303647	0.958	0.892	2.9392e-99		Hnrnpul2	0	0.322725	0.749	0.289	0
Eif4b	0.0389317	0.274692	0.502	0.709	1		Lrpprc	1.02842e-43	0.303278	0.246	0.173	1.63684e-39		Madd	0	0.322454	0.591	0.138	0
Mgat5	8.2127e-11	0.274451	0.133	0.11	1.30713e-06		Wdr46	4.51077e-39	0.302013	0.246	0.181	7.17934e-35		Cisd3	0	0.321912	0.446	0.052	0
Rpl22	2.19485e-201	0.274272	0.994	0.997	3.49333e-197		Irgm1	0.0329849	0.301883	0.297	0.372	1		Uqcc3	0	0.321179	0.788	0.247	0
Tsnax	1.28206e-12	0.27397	0.283	0.445	2.04052e-08		Osbpl8	6.15416e-24	0.301775	0.299	0.259	9.79497e-20		Acsl5	0	0.320782	0.676	0.237	0
Ccndbp1	1.19238e-14	0.273824	0.231	0.363	1.89779e-10		Ythdf1	3.72208e-41	0.300973	0.345	0.281	5.92407e-37		Glo1	0	0.320445	0.674	0.195	0
Araf	4.23078e-10	0.273086	0.214	0.319	6.73371e-06		Eif4b	2.0858e-70	0.300327	0.674	0.624	3.31975e-66		Yipf3	0	0.319306	0.724	0.214	0
Tspan13	5.53487e-09	0.27291	0.193	0.281	8.80929e-05		Larp1b	1.17647e-17	0.29985	0.256	0.228	1.87247e-13		Alad	0	0.318976	0.549	0.105	0
Klk8	0.262111	0.272888	0.471	0.666	1		Slc30a5	1.40145e-57	0.299084	0.265	0.17	2.23055e-53		Mical1	0	0.318886	0.513	0.081	0
Hdac7	2.05766e-12	0.272765	0.193	0.292	3.27496e-08		Cfdp1	6.92714e-42	0.299055	0.505	0.473	1.10252e-37		Casp1	0	0.318349	0.284	0.013	0
Galnt10	0.176095	0.27271	0.116	0.121	1		Naa20	1.46819e-36	0.298837	0.513	0.493	2.33677e-32		Fam111a	0	0.318318	0.56	0.116	0
Mfap1a	7.69771e-09	0.272482	0.155	0.225	0.000122517		Ctu2	1.77914e-35	0.298693	0.272	0.211	2.83168e-31		Eif3l	2.58303e-298	0.317992	0.855	0.389	4.11115e-294
Prpf39	0.000391252	0.272441	0.204	0.274	1		Tbc1d15	8.36483e-37	0.298332	0.345	0.288	1.33135e-32		Serpinb6a	0	0.317883	0.398	0.045	0
Rtn4	2.90697e-16	0.271899	0.236	0.376	4.62673e-12		Hirip3	1.08442e-24	0.29807	0.27	0.224	1.72596e-20		Cenps	0	0.317163	0.318	0.006	0
Atxn7	0.431826	0.27167	0.149	0.175	1		Rbmxl1	1.47386e-38	0.297317	0.478	0.432	2.3458e-34		Gimap4	1.14551e-193	0.317137	0.999	0.851	1.8232e-189
Mitd1	2.19496e-12	0.271633	0.235	0.359	3.4935e-08		Rnf157	6.32094e-82	0.297044	0.175	0.076	1.00604e-77		Evl	0	0.316849	0.897	0.38	0
Itgb3	0.000920763	0.270955	0.145	0.142	1		Impdh1	5.82014e-38	0.296925	0.271	0.204	9.26333e-34		Ndufb5	6.67715e-232	0.315781	0.966	0.633	1.06274e-227
Zfhx2	0.655531	0.270557	0.128	0.142	1		Degs1	9.85668e-23	0.295922	0.359	0.336	1.56879e-18		Timm17b	0	0.315656	0.705	0.209	0
Zfp831	0.0294648	0.270479	0.121	0.123	1		Shmt2	7.48327e-30	0.295772	0.251	0.201	1.19104e-25		Grb2	1.32405e-267	0.315593	0.875	0.44	2.10735e-263
Sec24c	0.000239354	0.27037	0.187	0.251	1		B930036N10Rik	6.21333e-63	0.295505	0.205	0.111	9.88913e-59		Mrps11	0	0.315327	0.565	0.117	0
Cyfip2	1.05168e-06	0.270325	0.336	0.509	0.0167385		Polr3e	1.64466e-78	0.295287	0.179	0.083	2.61765e-74		Atp5b	1.55646e-202	0.314827	0.993	0.853	2.47726e-198
Tesk1	0.0019869	0.270291	0.184	0.241	1		Plscr1	0.00143393	0.294263	0.139	0.134	1		Lsm2	3.6067e-258	0.314812	0.74	0.351	5.74042e-254
Xpr1	0.845856	0.27005	0.135	0.154	1		Syngr2	7.63795e-06	0.293967	0.336	0.363	0.121566		Bub3	1.12624e-195	0.314785	0.812	0.429	1.79253e-191
Mctp2	0.657783	0.269918	0.121	0.133	1		Sept11	5.72099e-16	0.293565	0.494	0.501	9.10552e-12		Eci2	0	0.314743	0.561	0.105	0
Chd8	3.39569e-17	0.26979	0.253	0.405	5.40458e-13		Carnmt1	2.48997e-29	0.293357	0.31	0.265	3.96304e-25		Pcbd2	0	0.314517	0.604	0.133	0
Snai3	1.25382e-30	0.269451	0.104	0.06	1.99558e-26		Nat10	6.91363e-56	0.293198	0.216	0.129	1.10037e-51		Hadh	0	0.314364	0.58	0.121	0
Tcf25	0.0134437	0.269254	0.403	0.603	1		Gclc	4.00527e-59	0.293066	0.234	0.139	6.37479e-55		Hmbs	0	0.314287	0.476	0.068	0
mt-Nd4l	7.41885e-16	0.269225	0.634	0.828	1.18078e-11		Pttg1ip	3.52215e-15	0.292983	0.24	0.205	5.60586e-11		Hnrnpa3	4.64083e-176	0.314101	0.971	0.787	7.38634e-172
Celf1	6.65578e-11	0.269208	0.303	0.468	1.05933e-06		Vkorc1l1	1.5625e-62	0.292953	0.183	0.098	2.48687e-58		Sin3b	3.36463e-219	0.313864	0.929	0.537	5.35515e-215
Dock8	6.12444e-11	0.269206	0.287	0.445	9.74765e-07		Adpgk	2.31484e-111	0.292874	0.185	0.07	3.68431e-107		C330027C09Rik	0	0.313731	0.293	0.004	0
Dmxl1	0.0111252	0.269202	0.153	0.194	1		Kars	3.56663e-25	0.29232	0.365	0.338	5.67664e-21		Lrmp	0	0.313386	0.836	0.334	0
Trpm7	5.12464e-14	0.268797	0.179	0.275	8.15638e-10		Phlda1	5.09497e-30	0.291917	0.178	0.118	8.10915e-26		Usp1	0	0.313368	0.61	0.243	0
Usp3	6.4084e-14	0.268489	0.221	0.34	1.01996e-09		Fbxo11	8.53229e-43	0.29184	0.269	0.191	1.358e-38		Stat1	0	0.313204	0.893	0.407	0
Zzef1	9.93118e-12	0.268451	0.165	0.248	1.58065e-07		Lsm7	1.40427e-28	0.291806	0.449	0.429	2.23504e-24		Ak3	0	0.312683	0.417	0.045	0
Gimap9	3.87006e-14	0.268449	0.612	0.734	6.1596e-10		A630089N07Rik	8.17306e-40	0.291476	0.19	0.123	1.30082e-35		Oxct1	0	0.312214	0.611	0.146	0
Naga	1.46036e-07	0.268184	0.101	0.085	0.00232431		Gsdme	2.829e-88	0.291458	0.177	0.076	4.50264e-84		Dnm2	0	0.312167	0.641	0.157	0
Lrch3	4.20201e-13	0.268049	0.193	0.295	6.68792e-09		Tmem97	2.73523e-29	0.291146	0.216	0.165	4.3534e-25		Nek2	0	0.311766	0.273	0.001	0
St3gal6	0.000591145	0.267715	0.335	0.475	1		Ino80	1.43499e-37	0.290055	0.291	0.223	2.28393e-33		Mocs2	0	0.31166	0.541	0.098	0
Pias1	3.8914e-07	0.267593	0.174	0.246	0.00619355		Bst2	1.59542e-23	0.289703	0.566	0.565	2.53927e-19		Cd27	7.69419e-298	0.311371	0.87	0.407	1.22461e-293
Cnot6l	0.447724	0.267584	0.483	0.687	1		Klhdc4	4.85955e-26	0.289124	0.299	0.264	7.73446e-22		Ap1m1	0	0.311134	0.484	0.077	0
Ctdsp2	8.8948e-11	0.26745	0.149	0.222	1.4157e-06		Rbm15b	4.01559e-39	0.288935	0.231	0.161	6.39121e-35		Tpgs1	0	0.310839	0.508	0.085	0
Rbpms	1.74775e-05	0.267442	0.107	0.095	0.278172		Ahsa2	4.56542e-34	0.28887	0.308	0.25	7.26633e-30		Naca	0	0.310711	1	0.983	0
Tapbp	4.34642e-06	0.267122	0.531	0.702	0.0691777		Stat3	1.83491e-17	0.288206	0.411	0.404	2.92044e-13		Rhog	0	0.310472	0.741	0.244	0
Dazap2	0.420415	0.267103	0.428	0.623	1		Timm50	2.97889e-26	0.287377	0.385	0.363	4.74119e-22		Gm17745	0	0.310116	0.298	0.024	0
Pdzd8	3.13485e-13	0.267092	0.233	0.356	4.98943e-09		Nsun5	5.91218e-86	0.287353	0.17	0.073	9.40983e-82		Map1lc3b	1.14769e-220	0.309488	0.969	0.594	1.82667e-216
Ppp1r18	0.00123111	0.267064	0.476	0.612	1		Xpo6	4.91179e-25	0.286554	0.338	0.302	7.81761e-21		Rinl	1.37114e-240	0.309073	0.963	0.529	2.1823e-236
Clk4	0.000122781	0.267024	0.19	0.257	1		Nup153	8.14783e-31	0.286245	0.347	0.298	1.29681e-26		Baz1b	8.87111e-281	0.309064	0.718	0.325	1.41193e-276
B4galt1	1.28088e-16	0.266709	0.188	0.298	2.03864e-12		Colgalt1	6.8022e-39	0.286004	0.211	0.142	1.08264e-34		Gbp3	0	0.308468	0.512	0.101	0
Sdf4	5.89542e-11	0.266142	0.583	0.788	9.38315e-07		Nadk	2.26247e-39	0.285747	0.288	0.221	3.60095e-35		Banf1	2.33628e-219	0.308425	0.839	0.461	3.71842e-215
Nbeal1	5.18821e-07	0.266115	0.108	0.092	0.00825755		Adsl	1.74951e-29	0.285399	0.291	0.242	2.78451e-25		Ppil2	0	0.308362	0.726	0.212	0
Rps6ka3	4.24739e-06	0.266016	0.233	0.325	0.0676014		Arih1	1.51125e-32	0.284776	0.38	0.332	2.4053e-28		Prkcq	0	0.308088	0.846	0.337	0
Dennd1a	0.147744	0.265986	0.12	0.125	1		Dennd4a	5.76352e-43	0.284634	0.305	0.21	9.17322e-39		Cenpp	0	0.308055	0.32	0.003	0
Cdk13	3.89453e-12	0.265966	0.283	0.438	6.19853e-08		Cldnd1	1.19949e-57	0.284568	0.261	0.168	1.9091e-53		Slc25a11	0	0.308026	0.79	0.253	0
Pcf11	9.52267e-13	0.265589	0.231	0.352	1.51563e-08		Pogk	1.69821e-60	0.28432	0.193	0.106	2.70287e-56		Sf3a2	0	0.307738	0.47	0.075	0
Arntl	0.0351882	0.265418	0.135	0.139	1		Btla	2.53824e-39	0.283927	0.235	0.162	4.03987e-35		Pmm1	0	0.306416	0.361	0.034	0
Tap2	1.64195e-05	0.265097	0.526	0.685	0.261333		Hnrnpf	3.2527e-112	0.283524	0.973	0.95	5.17699e-108		Rap1b	2.09687e-175	0.306255	0.959	0.7	3.33738e-171
Rcsd1	0.00188708	0.265086	0.366	0.531	1		Gmfb	8.17372e-26	0.2835	0.385	0.359	1.30093e-21		Arhgap4	0	0.305788	0.611	0.134	0
Hexim1	0.0552382	0.265079	0.143	0.176	1		Trmt6	2.39198e-24	0.283247	0.295	0.255	3.80707e-20		Gclm	0	0.305614	0.447	0.065	0
Camk2g	2.1872e-10	0.265009	0.171	0.253	3.48115e-06		Srpr	2.34662e-34	0.282846	0.487	0.464	3.73488e-30		Gars	0	0.305457	0.647	0.205	0
Bclaf1	0.335689	0.264937	0.501	0.717	1		Ubap2	1.32515e-28	0.282734	0.281	0.233	2.1091e-24		Tmem173	0	0.305408	0.691	0.181	0
Shprh	0.000845072	0.264894	0.144	0.189	1		Ndufa12	1.96099e-48	0.2825	0.672	0.625	3.12111e-44		Mrps36	0	0.305282	0.747	0.262	0
Zfp266	1.46251e-05	0.264699	0.172	0.236	0.232773		Wdr4	3.08589e-64	0.281974	0.173	0.089	4.9115e-60		Ehbp1l1	0	0.304851	0.51	0.092	0
Nxpe3	9.37417e-09	0.264636	0.183	0.265	0.000149199		Eif1ad	1.32329e-25	0.281972	0.386	0.363	2.10615e-21		Ostc	4.67413e-208	0.304684	0.925	0.547	7.43935e-204
Inpp1	4.5465e-16	0.264379	0.213	0.336	7.23622e-12		Papola	6.95483e-46	0.281362	0.584	0.553	1.10693e-41		Vps28	7.28647e-289	0.304613	0.934	0.454	1.15971e-284
Pdcd7	4.42259e-14	0.2642	0.2	0.307	7.03899e-10		Bax	9.45791e-53	0.281319	0.726	0.685	1.50532e-48		Nudt1	0	0.304117	0.456	0.064	0
Tnip1	1.67351e-20	0.26347	0.19	0.309	2.66357e-16		Tmem65	8.73421e-87	0.281081	0.161	0.066	1.39014e-82		Uba2	0	0.303719	0.754	0.305	0
Morc3	4.36378e-16	0.263467	0.282	0.452	6.9454e-12		Ramp3	5.29075e-110	0.280946	0.092	0.018	8.42076e-106		Ndufa2	7.66053e-249	0.303508	0.936	0.514	1.21925e-244
Tmem229b	0.149113	0.263422	0.134	0.163	1		Eif3m	1.77633e-76	0.280378	0.885	0.854	2.82721e-72		Aspscr1	0	0.303364	0.533	0.095	0
Acaa2	2.83925e-12	0.263297	0.235	0.363	4.51895e-08		Frat2	6.77358e-26	0.279524	0.12	0.071	1.07808e-21		Commd4	0	0.302872	0.726	0.212	0
Eif2s3y	4.21002e-08	0.263272	0.346	0.541	0.000670068		Med21	6.47362e-35	0.279097	0.48	0.455	1.03034e-30		Taf12	0	0.30287	0.672	0.189	0
Prpf4b	0.436454	0.26326	0.493	0.705	1		Foxp1	1.67243e-23	0.278923	0.479	0.454	2.66184e-19		Tmem154	0	0.30277	0.637	0.152	0
G3bp2	0.000366867	0.263166	0.551	0.768	1		Gm16286	2.34612e-34	0.278914	0.616	0.613	3.73409e-30		Vrk3	0	0.302699	0.605	0.129	0
Ttf1	8.02036e-11	0.262923	0.172	0.256	1.27652e-06		Tmem158	1.74393e-212	0.278843	0.126	0.015	2.77563e-208		Suz12	4.72743e-262	0.302293	0.7	0.323	7.52417e-258
Gigyf1	0.246422	0.26278	0.131	0.155	1		Gmps	1.35036e-34	0.278664	0.484	0.452	2.14923e-30		Ssr4	2.21766e-196	0.30209	0.976	0.666	3.52963e-192
Tsc22d4	0.00198917	0.262743	0.48	0.624	1		Zfp451	3.64522e-32	0.278173	0.249	0.185	5.80173e-28		Snx4	0	0.302038	0.619	0.148	0
Fosb	3.65443e-24	0.262596	0.136	0.09	5.81639e-20		Bloc1s4	7.27234e-32	0.278003	0.294	0.239	1.15747e-27		B3gat3	0	0.301969	0.604	0.137	0
Fam53a	7.18808e-13	0.262521	0.184	0.28	1.14406e-08		Slc7a6	1.36964e-73	0.277153	0.15	0.065	2.17993e-69		Lrwd1	0	0.301587	0.508	0.09	0
Slco3a1	0.000245675	0.262236	0.181	0.242	1		Las1l	8.30195e-29	0.27704	0.313	0.262	1.32134e-24		Rps20	0	0.301482	1	0.999	0
Snx20	7.70232e-15	0.262099	0.279	0.444	1.2259e-10		Smim13	4.9166e-131	0.276899	0.161	0.048	7.82526e-127		Tkt	1.12327e-217	0.301136	0.888	0.495	1.78779e-213
Trim24	2.54325e-07	0.261983	0.134	0.188	0.00404784		Ppm1g	1.9294e-35	0.276808	0.586	0.547	3.07084e-31		Ndufa4	2.00042e-243	0.300157	0.993	0.894	3.18387e-239
Xrn1	1.97064e-18	0.261892	0.258	0.416	3.13647e-14		Mafg	2.81566e-16	0.276612	0.337	0.325	4.4814e-12		Mrpl13	0	0.300152	0.708	0.24	0
Tmx3	5.31443e-11	0.261855	0.191	0.285	8.45845e-07		Golga4	1.66642e-30	0.276174	0.383	0.331	2.65228e-26		Polr3c	0	0.29949	0.524	0.099	0
Cd2	7.44547e-07	0.261753	0.545	0.684	0.0118502		Mettl2	8.15905e-65	0.275904	0.202	0.11	1.29859e-60		Hjurp	0	0.299296	0.545	0.163	0
Wdr44	0.0177817	0.261707	0.13	0.163	1		Sh2b3	2.24083e-86	0.274541	0.202	0.093	3.5665e-82		Rbbp4	6.44219e-221	0.298781	0.818	0.43	1.02534e-216
Letm2	7.47023e-05	0.261612	0.103	0.092	1		Nudt5	2.31028e-26	0.274043	0.405	0.38	3.67704e-22		Hprt	1.87647e-236	0.298675	0.84	0.437	2.98659e-232
Ralbp1	5.48514e-10	0.261558	0.339	0.528	8.73015e-06		Srsf11	1.02331e-57	0.273868	0.748	0.699	1.62869e-53		Apobec2	0	0.298548	0.196	0.004	0
Sipa1l1	0.278987	0.261542	0.161	0.176	1		Thap12	1.06179e-28	0.273662	0.268	0.214	1.68994e-24		Thoc6	0	0.297787	0.433	0.059	0
Slc38a9	2.06576e-05	0.261328	0.139	0.188	0.328786		Dcaf1	1.27157e-35	0.273655	0.233	0.169	2.02383e-31		Hmox2	0	0.29768	0.652	0.165	0
Polr2g	0.727676	0.261323	0.428	0.618	1		Nab1	1.69081e-09	0.273562	0.334	0.34	2.69109e-05		Nek7	0	0.297665	0.731	0.22	0
Sytl2	4.2709e-19	0.261305	0.177	0.283	6.79756e-15		Trim44	1.07241e-30	0.273483	0.366	0.306	1.70685e-26		Ergic3	0	0.297644	0.651	0.165	0
Lta4h	9.59516e-24	0.261002	0.225	0.375	1.52716e-19		Gcn1l1	1.35565e-26	0.273255	0.289	0.24	2.15765e-22		Sec61g	4.38475e-198	0.297571	0.96	0.636	6.97877e-194
Inafm2	6.66945e-14	0.260841	0.118	0.089	1.06151e-09		Ubxn4	1.41833e-22	0.272964	0.574	0.587	2.25742e-18		Eif2b2	0	0.297219	0.574	0.128	0
Gdf11	1.09878e-06	0.260623	0.102	0.087	0.0174881		Klf16	6.99319e-78	0.272802	0.156	0.067	1.11304e-73		2010107E04Rik	3.59459e-218	0.296907	0.911	0.498	5.72115e-214
Cbx6	0.0245285	0.260462	0.121	0.151	1		Zfp131	7.01537e-22	0.271826	0.273	0.23	1.11657e-17		Lage3	0	0.296583	0.642	0.154	0
Tmx4	0.181178	0.260259	0.111	0.132	1		Memo1	2.69183e-16	0.271513	0.27	0.25	4.28431e-12		Ddx46	3.36745e-222	0.296563	0.907	0.494	5.35963e-218
Retreg3	0.000202295	0.260003	0.132	0.176	1		Tsc22d2	7.68134e-39	0.271153	0.253	0.174	1.22256e-34		Nde1	0	0.296524	0.492	0.097	0
Dtnbp1	1.24044e-21	0.259982	0.21	0.348	1.97429e-17		Chst11	6.23678e-105	0.271122	0.139	0.045	9.92646e-101		Myg1	0	0.296023	0.567	0.13	0
Zfand6	6.05947e-09	0.259565	0.34	0.529	9.64425e-05		Pcgf6	7.29342e-53	0.271004	0.176	0.098	1.16082e-48		Bscl2	0	0.295595	0.634	0.153	0
2810403A07Rik	4.52161e-05	0.259417	0.183	0.248	0.71966		Csde1	2.19172e-46	0.270756	0.619	0.586	3.48834e-42		Ccnf	0	0.295045	0.251	0.001	0
Abcg3	0.0556222	0.259267	0.113	0.115	1		Slc25a37	5.96764e-72	0.270713	0.2	0.101	9.4981e-68		Copb2	0	0.294668	0.784	0.306	0
Dok2	2.86359e-08	0.258956	0.547	0.659	0.000455769		Rangrf	2.7641e-79	0.270097	0.155	0.066	4.39934e-75		Poc1a	0	0.294442	0.312	0.005	0
Kcnq5	4.89279e-23	0.258744	0.101	0.063	7.78737e-19		Tm9sf4	1.45287e-42	0.269753	0.269	0.192	2.31239e-38		Nsmce4a	5.05791e-265	0.294422	0.789	0.368	8.05017e-261
Itga1	1.59377e-07	0.258605	0.114	0.159	0.00253664		Rcc1	2.69026e-17	0.269351	0.219	0.188	4.28182e-13		0610010K14Rik	0	0.293816	0.527	0.1	0
Usf1	1.40345e-10	0.258568	0.16	0.238	2.23374e-06		Tuba1c	5.25187e-39	0.269059	0.367	0.287	8.35888e-35		Fcho1	0	0.293526	0.497	0.084	0
Gpatch8	1.6409e-16	0.258307	0.265	0.424	2.61165e-12		Polr3g	1.71814e-101	0.26901	0.157	0.057	2.73459e-97		Rpl7a	1.72513e-301	0.293522	1	0.983	2.74572e-297
Pigx	5.01515e-14	0.258103	0.274	0.434	7.98211e-10		Slc25a5	5.98258e-59	0.268958	0.94	0.882	9.52187e-55		Nqo2	0	0.293292	0.329	0.017	0
H2-T22	0.00854322	0.257879	0.484	0.628	1		Ado	1.66819e-43	0.268719	0.277	0.199	2.65509e-39		Bcl7c	0	0.293272	0.726	0.264	0
Rab6b	9.78792e-30	0.257824	0.091	0.05	1.55784e-25		Wdr36	3.56883e-22	0.26869	0.232	0.19	5.68014e-18		Yif1b	0	0.292549	0.536	0.11	0
Lpcat4	0.742544	0.257726	0.124	0.141	1		Simc1	1.02621e-184	0.268676	0.129	0.02	1.63331e-180		Capza1	1.065e-300	0.292544	0.878	0.406	1.69505e-296
Chn2	3.11051e-09	0.257473	0.201	0.293	4.95069e-05		Litaf	1.01151e-12	0.268352	0.169	0.143	1.60992e-08		Sap30l	0	0.292536	0.744	0.27	0
Cbr1	3.32525e-11	0.257156	0.17	0.254	5.29247e-07		Cyb5b	1.88829e-29	0.268009	0.469	0.449	3.0054e-25		Rab8a	0	0.291959	0.87	0.384	0
Cep192	1.31234e-18	0.257061	0.189	0.305	2.08873e-14		Suco	3.19126e-35	0.26712	0.296	0.222	5.07921e-31		Gyg	0	0.291731	0.492	0.088	0
Chrac1	3.26349e-06	0.256318	0.367	0.563	0.0519416		Snrnp70	1.39288e-67	0.267013	0.796	0.755	2.2169e-63		Urod	0	0.291187	0.482	0.068	0
Gm11713	0.54123	0.255719	0.125	0.144	1		Gpbp1	2.29047e-33	0.266469	0.531	0.509	3.64551e-29		Trim12c	0	0.290804	0.634	0.17	0
Phf12	4.70477e-10	0.255678	0.162	0.238	7.48812e-06		Nabp1	1.05857e-15	0.265895	0.452	0.421	1.68482e-11		Tm6sf1	0	0.290798	0.558	0.148	0
Mob3c	3.79648e-12	0.255471	0.1	0.075	6.04248e-08		9130401M01Rik	4.1932e-19	0.265736	0.283	0.252	6.6739e-15		Ctsb	0	0.29066	0.864	0.373	0
Gm42372	1.35943e-19	0.255451	0.085	0.053	2.16367e-15		Mpp7	2.65414e-53	0.265175	0.118	0.052	4.22432e-49		Naxe	0	0.290644	0.549	0.102	0
Sipa1	0.000452502	0.255429	0.359	0.525	1		Prmt6	4.10919e-66	0.265132	0.181	0.092	6.54018e-62		Gm2a	0	0.290118	0.542	0.108	0
Zdhhc18	2.30071e-13	0.255187	0.325	0.519	3.66181e-09		Eloc	7.50708e-44	0.264941	0.664	0.623	1.19483e-39		Nup37	0	0.289474	0.409	0.058	0
Rnf111	6.31994e-08	0.255061	0.21	0.302	0.00100588		Pmepa1	5.09286e-188	0.264856	0.119	0.015	8.10579e-184		Cnpy2	0	0.288798	0.77	0.254	0
mt-Co2	0	0.254894	1	1	0		Zpr1	4.22551e-23	0.264762	0.323	0.289	6.72532e-19		Ddost	3.32675e-285	0.288121	0.826	0.374	5.29485e-281
Man2b1	9.39625e-11	0.254849	0.348	0.551	1.49551e-06		Ascc3	9.35961e-19	0.264258	0.331	0.3	1.48968e-14		Topbp1	0	0.287807	0.553	0.159	0
Zfp467	7.82502e-49	0.254782	0.082	0.032	1.24543e-44		Snhg6	7.09742e-24	0.263701	0.296	0.257	1.12963e-19		Il16	0	0.287456	0.804	0.26	0
Nsd3	0.000296492	0.254615	0.379	0.564	1		Ptcd3	4.65712e-26	0.263431	0.26	0.209	7.41228e-22		Osbpl9	0	0.287453	0.593	0.137	0
Ankhd1	4.97452e-16	0.254275	0.202	0.316	7.91744e-12		F2r	0.0214257	0.262921	0.247	0.249	1		Sept6	2.65203e-305	0.287235	0.906	0.418	4.22097e-301
Dse	3.5738e-32	0.254041	0.083	0.042	5.68806e-28		D1Ertd622e	4.66812e-67	0.262892	0.182	0.089	7.42978e-63		Fam69a	0	0.286641	0.44	0.063	0
Herc6	2.949e-10	0.253844	0.171	0.25	4.69363e-06		Spred1	1.74173e-138	0.262558	0.141	0.035	2.77214e-134		Ogfr	0	0.286453	0.705	0.23	0
3830406C13Rik	1.11006e-16	0.253759	0.263	0.42	1.76678e-12		Comtd1	1.56129e-24	0.262227	0.219	0.171	2.48495e-20		Thrap3	9.28541e-199	0.285491	0.9	0.53	1.47787e-194
Rc3h2	2.36157e-09	0.253669	0.167	0.242	3.75867e-05		Tial1	1.38065e-23	0.260826	0.4	0.382	2.19744e-19		Rbck1	0	0.285418	0.761	0.263	0
Hgsnat	0.908462	0.253531	0.117	0.132	1		Gpn1	1.42742e-29	0.259803	0.262	0.205	2.27188e-25		Asrgl1	0	0.285324	0.599	0.145	0
Gpr68	0.735079	0.253481	0.132	0.151	1		Kansl2	1.23919e-24	0.259558	0.246	0.196	1.9723e-20		Cs	0	0.285241	0.652	0.191	0
Gabarap	8.8033e-21	0.2532	0.655	0.784	1.40113e-16		Nol6	4.30009e-64	0.259552	0.165	0.081	6.84403e-60		Qrfp	0	0.284813	0.259	0.01	0
Ormdl3	0.00589751	0.253025	0.153	0.196	1		Polr1a	7.93493e-39	0.259203	0.201	0.131	1.26292e-34		Hist1h3e	0	0.284715	0.26	0.014	0
Ppt2	1.51612e-13	0.252577	0.1	0.073	2.41306e-09		Pfdn6	2.07801e-36	0.258465	0.622	0.578	3.30736e-32		Dnajc8	8.89936e-212	0.283599	0.91	0.511	1.41642e-207
Apol7e	4.41316e-34	0.252524	0.084	0.041	7.02399e-30		Ube2v2	2.29587e-30	0.258358	0.472	0.454	3.65411e-26		Snx3	2.6115e-243	0.283546	0.9	0.465	4.15646e-239
mt-Nd3	3.53807e-55	0.252374	0.901	0.973	5.6312e-51		5430416N02Rik	1.39429e-73	0.25685	0.165	0.075	2.21916e-69		Mrpl35	0	0.283529	0.705	0.234	0
Rock1	3.37702e-07	0.252374	0.609	0.794	0.00537487		Mrps18b	4.21347e-19	0.256469	0.327	0.303	6.70616e-15		Mrps24	6.4289e-193	0.283185	0.93	0.55	1.02322e-188
Plgrkt	0.877617	0.252252	0.457	0.648	1		Atp11a	1.5071e-71	0.256357	0.141	0.058	2.3987e-67		Ppp1r35	0	0.282992	0.635	0.165	0
Matr3	0.757259	0.252209	0.485	0.698	1		Ero1l	7.33001e-27	0.256253	0.39	0.34	1.16664e-22		Ppm1m	0	0.282699	0.482	0.077	0
Fam193a	2.66581e-13	0.251731	0.187	0.286	4.2429e-09		P4ha1	2.87405e-89	0.256085	0.165	0.066	4.57435e-85		Cope	0	0.282154	0.829	0.335	0
Bcl7b	8.53918e-21	0.251549	0.201	0.328	1.3591e-16		Atp13a3	2.79888e-23	0.255444	0.32	0.281	4.4547e-19		Ctcf	3.63367e-252	0.28208	0.863	0.437	5.78336e-248
Kidins220	1.53913e-08	0.251506	0.165	0.236	0.000244969		Dohh	5.50436e-20	0.255372	0.325	0.301	8.76074e-16		Cdca5	0	0.282078	0.269	0.002	0
Icam1	0.0001161	0.251431	0.243	0.319	1		Mthfd2	2.30674e-11	0.255294	0.385	0.398	3.67141e-07		Cdc6	0	0.281723	0.243	0.003	0
Gpbp1	9.55493e-05	0.251395	0.389	0.583	1		Fyn	1.50673e-29	0.255164	0.7	0.71	2.39812e-25		Polr2j	5.00462e-239	0.281447	0.867	0.43	7.96535e-235
Rbbp6	0.212039	0.250923	0.451	0.651	1		Smn1	2.58193e-17	0.255116	0.363	0.357	4.1094e-13		Melk	0	0.280669	0.283	0.004	0
Ints6	3.67427e-12	0.250848	0.226	0.34	5.84797e-08		Wsb1	5.1522e-23	0.25457	0.295	0.252	8.20024e-19		Taf6l	0	0.280583	0.759	0.242	0
Leng9	1.08695e-05	0.250804	0.099	0.087	0.173		R3hdm1	5.71051e-28	0.25456	0.487	0.461	9.08885e-24		Nfkbil1	0	0.28051	0.536	0.112	0
Jade1	0.00365379	0.250628	0.119	0.152	1		Pdxp	1.70966e-84	0.254363	0.153	0.061	2.72109e-80		Bud31	0	0.280482	0.764	0.283	0
Nlrc3	2.01032e-12	0.250491	0.17	0.257	3.19962e-08		Tsr2	6.804e-72	0.253945	0.178	0.085	1.08292e-67		Selenop	0	0.28022	0.427	0.072	0
Tmcc1	0.433124	0.250393	0.138	0.16	1		Polr1e	1.6472e-27	0.253688	0.214	0.162	2.62168e-23		Pold3	0	0.280001	0.446	0.083	0
Snrnp70	5.11073e-15	0.250281	0.631	0.838	8.13424e-11		Dnajb6	8.59995e-41	0.253666	0.693	0.673	1.36877e-36		Ptrhd1	0	0.279943	0.438	0.067	0
Crbn	2.07592e-20	0.24971	0.223	0.363	3.30403e-16		Riok2	1.86412e-33	0.252615	0.223	0.161	2.96694e-29		Gipc1	0	0.279859	0.434	0.06	0
Cerk	0.000196059	0.249162	0.099	0.089	1		Tbrg4	5.02154e-32	0.25241	0.184	0.126	7.99228e-28		2610318N02Rik	0	0.279768	0.293	0.014	0
Xylt2	0.00467106	0.248605	0.098	0.093	1		Mgll	4.63594e-134	0.251944	0.125	0.027	7.37856e-130		Tmem192	0	0.279257	0.576	0.119	0
Apobec3	3.79914e-24	0.248465	0.707	0.711	6.0467e-20		Smad3	2.72478e-24	0.251826	0.304	0.258	4.33676e-20		Uba1	0	0.278917	0.729	0.269	0
Nt5dc1	7.93933e-15	0.248209	0.168	0.261	1.26362e-10		Timm8b	1.50184e-22	0.250516	0.47	0.462	2.39033e-18		Sf3b6	7.32304e-181	0.278862	0.96	0.656	1.16553e-176
Mcl1	2.59082e-13	0.248028	0.641	0.843	4.12355e-09		Tex30	5.73393e-17	0.25049	0.283	0.26	9.12612e-13		2310011J03Rik	0	0.278705	0.685	0.207	0
Rpl13	0	0.248022	1	1	0		Cdk4	1.0884e-29	0.250485	0.619	0.585	1.7323e-25		Psat1	0	0.278678	0.442	0.082	0
Arhgef1	1.41677e-06	0.247996	0.531	0.648	0.0225494		Ttc27	3.9256e-71	0.249636	0.172	0.082	6.24798e-67		Bloc1s2	0	0.278514	0.644	0.185	0
Ivd	0.0169009	0.247892	0.106	0.105	1		Tkt	1.36267e-26	0.249245	0.686	0.64	2.16882e-22		Ndufb2	0	0.278381	0.704	0.235	0
Cox10	1.47481e-08	0.247753	0.163	0.233	0.000234731		Rybp	1.11119e-65	0.249091	0.183	0.092	1.76857e-61		Blvra	0	0.278093	0.558	0.118	0
Tspan14	0.000285845	0.247594	0.137	0.181	1		Prpf4	6.58729e-17	0.248646	0.255	0.222	1.04843e-12		Fbxl8	0	0.278008	0.387	0.042	0
Atrx	0.000775903	0.247495	0.584	0.773	1		Anp32e	2.42312e-52	0.247591	0.705	0.554	3.85664e-48		Naa10	0	0.277836	0.75	0.288	0
Impact	0.0045931	0.247447	0.1	0.095	1		Eef1akmt4	1.39971e-75	0.247462	0.149	0.064	2.22777e-71		Fh1	0	0.277638	0.622	0.191	0
Mier1	0.1252	0.246971	0.448	0.659	1		Ghitm	3.16817e-29	0.247337	0.571	0.56	5.04247e-25		Eef1akmt1	0	0.277537	0.575	0.137	0
Cept1	1.78044e-14	0.246784	0.232	0.361	2.83374e-10		Gps1	8.1356e-14	0.247238	0.378	0.381	1.29486e-09		Coa3	0	0.277468	0.812	0.317	0
Zadh2	0.149833	0.246665	0.109	0.13	1		Prr7	8.96055e-33	0.247124	0.142	0.086	1.42616e-28		Trip13	0	0.276773	0.292	0.005	0
Sh2b1	0.000205606	0.246586	0.13	0.172	1		Ercc8	1.0239e-61	0.247075	0.16	0.078	1.62964e-57		Gabpb2	0	0.27674	0.654	0.188	0
Trmt13	0.253764	0.246483	0.149	0.177	1		Thop1	1.02882e-35	0.246421	0.152	0.094	1.63746e-31		Ddt	0	0.276506	0.721	0.22	0
Zfp120	0.00374989	0.246475	0.124	0.158	1		Snrnp48	1.66566e-36	0.246214	0.528	0.49	2.65106e-32		Trim30a	0	0.276275	0.701	0.224	0
Abca2	0.681084	0.246381	0.116	0.132	1		Slc25a32	1.79784e-51	0.245891	0.167	0.09	2.86144e-47		Gabarap	2.61976e-206	0.276064	0.963	0.59	4.16962e-202
Ppp1cb	1.67367e-13	0.246358	0.319	0.505	2.66381e-09		Psmd12	6.18228e-37	0.245272	0.632	0.59	9.83972e-33		Pitpna	6.66095e-199	0.275726	0.937	0.551	1.06016e-194
Syne1	0.291266	0.246208	0.12	0.141	1		Scn1b	1.17591e-174	0.245136	0.108	0.013	1.87158e-170		Snx20	0	0.275634	0.696	0.181	0
Mysm1	2.31605e-20	0.245849	0.22	0.356	3.68622e-16		Cmss1	1.21263e-20	0.245037	0.205	0.164	1.93003e-16		Uqcrc2	1.04586e-213	0.275445	0.901	0.478	1.6646e-209
Plcb2	0.0821939	0.245841	0.118	0.143	1		U2af2	1.86379e-22	0.244541	0.43	0.413	2.96641e-18		Smchd1	1.93149e-230	0.275259	0.81	0.413	3.07416e-226
Cyhr1	3.84764e-23	0.245705	0.219	0.366	6.12391e-19		Ahcyl1	1.35985e-22	0.244411	0.257	0.212	2.16434e-18		Map4k1	0	0.275039	0.483	0.094	0
Ap5m1	0.0451811	0.245677	0.119	0.146	1		Cysltr1	3.66638e-23	0.244327	0.048	0.02	5.83541e-19		Ube2t	0	0.274691	0.315	0.021	0
Dicer1	1.59953e-21	0.245643	0.221	0.36	2.54581e-17		Gadd45gip1	5.57518e-25	0.244278	0.569	0.563	8.87345e-21		Spag5	0	0.274613	0.259	0.001	0
Gramd3	1.36585e-07	0.245627	0.325	0.469	0.00217389		Tbx21	3.79298e-08	0.244132	0.398	0.413	0.000603691		Arpp19	2.22804e-186	0.273905	0.894	0.516	3.54615e-182
Cir1	1.85199e-26	0.24535	0.231	0.388	2.94762e-22		Acsl4	2.83594e-19	0.243902	0.201	0.159	4.51368e-15		Rbx1	1.65735e-187	0.273859	0.977	0.703	2.63784e-183
Trim44	0.000326307	0.24529	0.26	0.354	1		Ubqln4	3.05096e-89	0.243723	0.158	0.062	4.8559e-85		Hikeshi	0	0.273855	0.68	0.219	0
Pcmtd2	0.489071	0.245289	0.108	0.116	1		Abt1	6.77952e-25	0.24358	0.29	0.247	1.07903e-20		Rab19	0	0.273826	0.589	0.127	0
1500011K16Rik	0.0054497	0.245106	0.162	0.207	1		Dad1	3.54001e-50	0.24347	0.885	0.849	5.63429e-46		Sigirr	0	0.273084	0.471	0.08	0
Mepce	2.85845e-10	0.245096	0.146	0.215	4.54951e-06		Mtrr	1.36989e-73	0.243345	0.14	0.058	2.18032e-69		H2-DMa	0	0.273055	0.41	0.064	0
Stx4a	7.70968e-17	0.245011	0.202	0.319	1.22707e-12		Ptprs	2.1531e-103	0.243207	0.119	0.033	3.42687e-99		Pimreg	0	0.272878	0.23	0	0
Trim35	6.7679e-26	0.244305	0.225	0.381	1.07718e-21		Spcs3	4.91967e-17	0.242774	0.37	0.356	7.83015e-13		Borcs8	0	0.272877	0.665	0.202	0
Rac2	2.40046e-62	0.244118	0.98	0.902	3.82057e-58		Per1	3.26189e-113	0.24243	0.133	0.038	5.19163e-109		Prelid3b	0	0.272539	0.627	0.218	0
Krt83	1.23493e-75	0.244108	0.069	0.016	1.96552e-71		Cdca7	1.57011e-13	0.242351	0.207	0.178	2.49899e-09		Oard1	0	0.272512	0.613	0.137	0
Hic1	0.933507	0.243787	0.123	0.138	1		Bend3	2.07406e-188	0.242312	0.106	0.011	3.30107e-184		Pts	0	0.272473	0.664	0.18	0
Klre1	5.77517e-05	0.243758	0.071	0.057	0.919175		Pla2g12a	1.28606e-26	0.241823	0.176	0.124	2.0469e-22		Tmem71	0	0.271777	0.455	0.088	0
Tcf20	1.37134e-14	0.24356	0.184	0.282	2.18262e-10		Inpp4b	1.69695e-21	0.241462	0.613	0.602	2.70087e-17		Rpl13a	3.93337e-181	0.271762	0.994	0.815	6.26035e-177
Drosha	6.9585e-09	0.243412	0.109	0.156	0.000110751		Cops8	3.40051e-22	0.241248	0.363	0.333	5.41226e-18		Brip1	0	0.271464	0.272	0.004	0
Tbc1d9b	0.0978727	0.243059	0.126	0.153	1		Btf3	1.30316e-115	0.240715	0.98	0.977	2.07412e-111		Nup210	0	0.271366	0.67	0.206	0
Parp4	1.11546e-09	0.242987	0.136	0.198	1.77536e-05		Ube2d3	2.34867e-65	0.240448	0.936	0.909	3.73814e-61		Psmd6	5.73071e-254	0.271024	0.819	0.379	9.121e-250
Ypel5	0.00699314	0.242871	0.127	0.161	1		Rbbp6	3.81046e-29	0.240088	0.589	0.578	6.06472e-25		Dpm2	0	0.271021	0.573	0.135	0
Ccdc174	2.28959e-21	0.242502	0.253	0.417	3.64412e-17		Pank3	3.05101e-55	0.239065	0.197	0.109	4.85599e-51		Cyb5r4	0	0.270341	0.61	0.162	0
Laptm4a	7.35837e-15	0.242449	0.274	0.429	1.17116e-10		Ube2f	2.28326e-18	0.23891	0.384	0.372	3.63404e-14		Cep250	0	0.270335	0.503	0.094	0
Bola1	2.95282e-23	0.242446	0.177	0.295	4.69972e-19		Tgoln1	1.4958e-27	0.238733	0.5	0.474	2.38072e-23		Vdac2	1.41944e-163	0.269985	0.948	0.626	2.25918e-159
Wac	5.94846e-13	0.242408	0.306	0.483	9.46756e-09		Rbm27	4.42202e-17	0.238434	0.375	0.362	7.03809e-13		Rnaseh2a	0	0.269974	0.444	0.066	0
Trib2	0.301218	0.242337	0.111	0.129	1		Dnajb11	1.4979e-22	0.23834	0.611	0.588	2.38406e-18		Cdt1	0	0.269768	0.393	0.07	0
Il17rb	1.19718e-37	0.242282	0.093	0.046	1.90543e-33		Homer1	6.30574e-127	0.237985	0.13	0.032	1.00362e-122		Trmt112	4.29141e-264	0.269684	0.888	0.417	6.83021e-260
Rps3a1	5.19087e-294	0.242241	0.999	0.999	8.26179e-290		Elac2	3.02071e-23	0.237975	0.187	0.14	4.80776e-19		Mknk2	0	0.269268	0.705	0.222	0
Xiap	3.10478e-23	0.242	0.235	0.391	4.94157e-19		Rps8	9.00482e-220	0.237905	0.999	1	1.43321e-215		Eif2ak2	0	0.269061	0.499	0.105	0
1810013L24Rik	0.279949	0.241835	0.128	0.151	1		Diexf	3.08414e-59	0.237352	0.162	0.081	4.90872e-55		Aimp1	3.8179e-249	0.268707	0.896	0.432	6.07657e-245
Sertad2	0.00789668	0.241681	0.145	0.183	1		Ttc19	2.31176e-45	0.236784	0.304	0.213	3.67939e-41		Fam49b	2.39396e-200	0.26837	0.943	0.563	3.81023e-196
Cd4	1.16785e-09	0.241575	0.174	0.251	1.85875e-05		Stt3b	4.92012e-26	0.236749	0.371	0.327	7.83086e-22		Sf3b5	2.01921e-188	0.268341	0.889	0.509	3.21378e-184
Dhx36	1.38414e-09	0.241181	0.378	0.599	2.203e-05		Trmt1	1.89379e-11	0.2362	0.25	0.231	3.01416e-07		Pla2g16	1.52743e-210	0.26829	0.948	0.525	2.43106e-206
Dcaf11	9.79378e-08	0.241151	0.146	0.207	0.00155878		Pbdc1	1.91856e-12	0.235931	0.372	0.38	3.05358e-08		Metrn	0	0.268144	0.472	0.072	0
Mtfr1l	8.00679e-15	0.241039	0.211	0.328	1.27436e-10		Pkm	3.48328e-26	0.23552	0.869	0.808	5.54399e-22		Cstb	0	0.268106	0.656	0.184	0
Mbnl2	0.0305069	0.240935	0.16	0.199	1		3010003L21Rik	3.07372e-58	0.235315	0.149	0.071	4.89213e-54		Ect2	0	0.267977	0.248	0.004	0
Sp4	4.04895e-06	0.240916	0.13	0.178	0.0644431		Rela	1.95124e-16	0.235225	0.335	0.311	3.10559e-12		AB124611	0	0.267783	0.371	0.047	0
Txndc15	1.79667e-11	0.240686	0.168	0.251	2.85958e-07		Il10ra	0.000762393	0.235121	0.132	0.124	1		Mgea5	0	0.267781	0.621	0.169	0
Usp47	2.32454e-21	0.24009	0.195	0.319	3.69974e-17		Hsf1	5.1567e-32	0.234988	0.227	0.162	8.2074e-28		Hip1	0	0.267576	0.329	0.028	0
Adgrl1	0.777142	0.239917	0.103	0.115	1		Scap	1.27513e-23	0.23476	0.187	0.136	2.0295e-19		Chst2	0	0.267494	0.558	0.18	0
Map3k2	0.055015	0.23961	0.124	0.151	1		BC003965	5.80765e-16	0.234061	0.361	0.346	9.24345e-12		Id3	2.60836e-265	0.267048	0.188	0.027	4.15147e-261
Arfgef1	1.33795e-18	0.239528	0.268	0.43	2.12948e-14		Mrpl17	2.01073e-14	0.233884	0.397	0.4	3.20029e-10		Ddx39b	5.67762e-199	0.266774	0.891	0.502	9.0365e-195
Gpr174	3.09034e-17	0.239334	0.187	0.291	4.91859e-13		Srsf1	2.7657e-21	0.233686	0.51	0.505	4.40189e-17		R3hdm4	0	0.266741	0.631	0.157	0
Rpl27	1.81425e-48	0.239254	0.856	0.956	2.88756e-44		Taf4b	7.97181e-166	0.233523	0.113	0.017	1.26879e-161		Casp8ap2	0	0.266564	0.634	0.228	0
Ppp3r1	1.31866e-10	0.239216	0.166	0.245	2.09878e-06		Scaf4	2.12154e-15	0.233501	0.237	0.203	3.37665e-11		Arrdc1	0	0.266324	0.469	0.073	0
Tob2	0.0127233	0.239183	0.228	0.294	1		Ptger4	1.78799e-19	0.233472	0.369	0.318	2.84576e-15		Cst3	0	0.26629	0.833	0.339	0
Cux1	4.98284e-05	0.239168	0.156	0.21	0.793068		Uba6	9.34032e-23	0.233314	0.232	0.182	1.48661e-18		Eif4a3	1.14449e-213	0.266105	0.822	0.415	1.82157e-209
Tmem260	0.000685329	0.239119	0.117	0.151	1		Txlng	1.75724e-26	0.233157	0.219	0.164	2.79683e-22		Pgp	2.19171e-299	0.266042	0.648	0.257	3.48833e-295
Traf2	1.87432e-19	0.238942	0.168	0.272	2.98317e-15		Mb21d1	5.04914e-17	0.233055	0.173	0.134	8.03622e-13		Romo1	0	0.265939	0.73	0.273	0
Cdc40	2.85454e-12	0.238904	0.346	0.553	4.54329e-08		Sept7	1.54396e-36	0.232269	0.879	0.84	2.45737e-32		Hscb	0	0.264808	0.494	0.1	0
Gnpda2	1.6295e-18	0.238871	0.176	0.281	2.59351e-14		Mier3	2.37289e-40	0.232168	0.137	0.073	3.7767e-36		Pdk3	0	0.264515	0.365	0.031	0
Usp9x	1.0597e-22	0.238705	0.23	0.377	1.68662e-18		Gpat4	1.05578e-34	0.232075	0.185	0.121	1.68038e-30		Wdr83os	8.35702e-252	0.264291	0.845	0.395	1.3301e-247
Dlg4	0.00569447	0.238356	0.103	0.098	1		Srp72	4.30507e-20	0.231596	0.542	0.553	6.85195e-16		Tmem126b	0	0.264192	0.435	0.062	0
Itsn2	2.00021e-16	0.238204	0.321	0.52	3.18353e-12		Chpf	3.33577e-30	0.230918	0.161	0.105	5.3092e-26		Hmgcl	0	0.263204	0.495	0.088	0
Tob1	4.8848e-09	0.238032	0.106	0.085	7.77465e-05		Hypk	9.159e-17	0.230835	0.401	0.4	1.45775e-12		Tomm22	3.70095e-159	0.263046	0.964	0.647	5.89044e-155
Dnajc1	5.50993e-13	0.237994	0.352	0.559	8.76961e-09		Net1	8.77221e-19	0.230507	0.163	0.123	1.39619e-14		Sirt7	0	0.262988	0.8	0.293	0
Zrsr2	2.36829e-19	0.237808	0.262	0.423	3.76936e-15		Ccnt1	8.05715e-16	0.230362	0.351	0.33	1.28238e-11		Rbbp8	0	0.262551	0.388	0.062	0
Ifit1bl1	0.0328952	0.237781	0.104	0.102	1		Xpo4	2.04552e-19	0.230295	0.222	0.179	3.25565e-15		Pcnt	0	0.262325	0.452	0.08	0
Mob3a	9.55407e-21	0.23765	0.184	0.3	1.52063e-16		Foxp4	1.22153e-20	0.230222	0.178	0.134	1.94419e-16		Aldoa	5.60114e-144	0.262155	0.974	0.742	8.91478e-140
Acbd5	1.23772e-11	0.237641	0.147	0.22	1.96996e-07		Cdk7	1.06032e-17	0.229361	0.269	0.236	1.6876e-13		Dnah8	0	0.261905	0.252	0.007	0
Zrsr1	4.45196e-18	0.237598	0.082	0.052	7.08574e-14		Lig3	5.93296e-29	0.228601	0.175	0.117	9.44291e-25		Dhrs7	0	0.261556	0.49	0.088	0
Pik3ca	5.37985e-12	0.237571	0.168	0.25	8.56257e-08		Psmg4	8.12186e-18	0.228551	0.405	0.398	1.29268e-13		Myb	0	0.261372	0.276	0.019	0
Mlycd	0.00019543	0.236974	0.121	0.161	1		Tpt1	7.15e-180	0.228542	1	1	1.13799e-175		Klrg1	2.33396e-301	0.261271	0.168	0.013	3.71473e-297
Uhrf1bp1l	0.332188	0.236629	0.165	0.196	1		Metap1	8.31324e-20	0.228379	0.234	0.193	1.32313e-15		Desi1	0	0.260662	0.574	0.149	0
Virma	1.59579e-22	0.236436	0.253	0.42	2.53986e-18		Aig1	2.15545e-08	0.228282	0.227	0.211	0.000343061		Ms4a4c	0	0.260509	0.266	0.033	0
Cnot1	8.04401e-19	0.236425	0.294	0.479	1.28028e-14		Chka	2.80555e-53	0.226965	0.136	0.065	4.46532e-49		Adprh	0	0.260459	0.604	0.151	0
Sp1	1.45693e-15	0.236164	0.166	0.258	2.31886e-11		Cdk6	2.97684e-08	0.226737	0.15	0.13	0.000473794		Polr2i	0	0.260258	0.555	0.124	0
Peli1	0.00842825	0.235981	0.364	0.499	1		Slc25a51	2.8037e-25	0.226275	0.256	0.199	4.46237e-21		Mrps12	0	0.259933	0.762	0.308	0
Trappc2l	3.76995e-25	0.235648	0.263	0.444	6.00026e-21		Pknox1	1.94748e-08	0.226179	0.228	0.214	0.00030996		Mettl26	0	0.259591	0.67	0.189	0
Mtmr3	7.65133e-06	0.235526	0.126	0.172	0.121779		Lzic	2.75571e-14	0.226017	0.289	0.272	4.38599e-10		Pecam1	0	0.259585	0.41	0.074	0
Rplp1	1.57566e-261	0.235508	1	1	2.50783e-257		Mbd3	2.55114e-16	0.225983	0.438	0.439	4.0604e-12		Srp19	4.62515e-250	0.259551	0.854	0.409	7.36139e-246
Tmem245	0.0236181	0.235464	0.134	0.166	1		Psma3	2.17825e-40	0.225773	0.88	0.825	3.4669e-36		Ctnnbl1	0	0.259466	0.559	0.126	0
Dennd1c	7.00477e-21	0.235461	0.198	0.322	1.11488e-16		Stx11	4.79065e-06	0.225713	0.201	0.193	0.076248		Vmp1	0	0.25916	0.766	0.312	0
Nceh1	0.0638539	0.235382	0.109	0.132	1		Ptpn4	6.95622e-32	0.22518	0.145	0.087	1.10715e-27		Acot8	0	0.259066	0.458	0.074	0
Mum1	2.98796e-22	0.235361	0.161	0.267	4.75563e-18		Fam98a	3.2726e-25	0.224376	0.179	0.127	5.20867e-21		Kif14	0	0.259039	0.23	0	0
Amn1	3.58779e-14	0.235332	0.141	0.216	5.71032e-10		Orc2	1.308e-13	0.224284	0.228	0.201	2.08181e-09		Slc25a3	1.68224e-179	0.258171	0.993	0.838	2.67745e-175
Rab4a	0.00978968	0.235313	0.102	0.099	1		Camta1	1.45414e-19	0.224272	0.234	0.193	2.31441e-15		Dnttip1	0	0.257798	0.608	0.156	0
Setd7	0.152994	0.23529	0.132	0.157	1		Txlna	4.01965e-07	0.223697	0.288	0.294	0.00639767		Smim20	0	0.257599	0.615	0.149	0
Tspyl1	1.21058e-06	0.234898	0.144	0.2	0.0192676		Tmem147	4.97755e-13	0.223658	0.378	0.381	7.92228e-09		Atp5l	4.03263e-198	0.257567	0.99	0.798	6.41833e-194
Hexa	9.93394e-08	0.234872	0.147	0.208	0.00158109		AI314180	9.75107e-11	0.223167	0.274	0.255	1.55198e-06		Atp5g3	5.22237e-160	0.257533	0.964	0.708	8.31192e-156
Msi2	4.22008e-13	0.234868	0.239	0.364	6.71668e-09		Taf5l	5.81339e-13	0.222335	0.204	0.174	9.25258e-09		Hist1h2bm	0	0.25749	0.239	0.003	0
BC017643	3.64576e-14	0.234583	0.192	0.295	5.80259e-10		Smg7	9.58649e-19	0.222188	0.227	0.185	1.52579e-14		Timeless	0	0.257209	0.304	0.024	0
Atp6v1g1	0.55793	0.234521	0.471	0.676	1		Smndc1	2.71985e-12	0.222023	0.376	0.375	4.32891e-08		Washc3	0	0.257195	0.612	0.148	0
Ubn1	1.75825e-10	0.234414	0.344	0.542	2.79843e-06		Champ1	1.88655e-36	0.221826	0.169	0.104	3.00263e-32		Commd8	0	0.257084	0.801	0.273	0
Ankmy2	8.63421e-12	0.234408	0.145	0.217	1.37422e-07		Vps54	1.99054e-18	0.221787	0.194	0.15	3.16814e-14		Ccm2	0	0.256653	0.735	0.236	0
Uvrag	9.06133e-09	0.234288	0.165	0.237	0.00014422		Ncs1	5.03278e-242	0.221769	0.095	0.002	8.01017e-238		Sh3glb1	5.81167e-227	0.25648	0.89	0.456	9.24985e-223
Exoc4	5.91923e-12	0.233814	0.161	0.241	9.42105e-08		Pphln1	4.10836e-25	0.221678	0.208	0.158	6.53887e-21		Erh	3.19241e-228	0.256373	0.797	0.385	5.08103e-224
Tapbpl	2.27683e-18	0.233623	0.29	0.469	3.6238e-14		Mrpl38	4.01015e-20	0.221499	0.265	0.223	6.38256e-16		Slc25a24	0	0.255891	0.31	0.021	0
Ms4a6c	7.08549e-10	0.233281	0.086	0.064	1.12773e-05		4932438A13Rik	0.00648058	0.220659	0.369	0.402	1		Atp2a3	0	0.255779	0.495	0.095	0
Slc12a7	4.59752e-10	0.233241	0.09	0.069	7.31742e-06		Pcnp	3.66248e-18	0.220557	0.486	0.492	5.8292e-14		Uba52	3.30266e-288	0.255524	0.845	0.372	5.25651e-284
Mark3	1.61373e-21	0.232018	0.218	0.356	2.56842e-17		Erf	1.60287e-100	0.219884	0.117	0.032	2.55112e-96		Churc1	0	0.255129	0.864	0.34	0
Jtb	0.000160626	0.232008	0.401	0.617	1		Cisd2	3.9414e-19	0.219838	0.498	0.498	6.27314e-15		Edem2	0	0.254598	0.487	0.088	0
Wdr20	8.27514e-11	0.231985	0.145	0.214	1.31707e-06		Rbm26	2.45124e-12	0.21907	0.359	0.35	3.90139e-08		Elovl1	0	0.253918	0.582	0.157	0
Tmem9b	1.12848e-25	0.231973	0.211	0.355	1.79608e-21		Foxj3	3.70146e-26	0.218923	0.222	0.163	5.89124e-22		Ehd3	0	0.253291	0.567	0.132	0
Lztfl1	2.0656e-07	0.231734	0.262	0.37	0.00328761		Tulp4	2.69628e-25	0.218915	0.237	0.179	4.2914e-21		Dnajc2	8.98619e-232	0.253055	0.83	0.409	1.43024e-227
Rmnd5a	8.1207e-05	0.231665	0.128	0.171	1		Trnt1	7.02739e-10	0.218899	0.314	0.308	1.11848e-05		Kif2a	0	0.252941	0.693	0.231	0
Rnaseh2c	0.00194546	0.231514	0.523	0.691	1		AU019823	5.4869e-15	0.218315	0.245	0.214	8.73295e-11		Acap1	0	0.252906	0.725	0.23	0
Gab3	1.85811e-14	0.231162	0.081	0.055	2.95736e-10		Cep83	3.27097e-09	0.218044	0.279	0.272	5.20607e-05		Ndufs4	1.37585e-215	0.252603	0.91	0.467	2.1898e-211
Ccdc71l	1.98195e-10	0.231107	0.135	0.199	3.15448e-06		Farsb	4.61006e-08	0.2179	0.28	0.282	0.000733738		Leprotl1	3.56769e-217	0.252542	0.942	0.529	5.67834e-213
Pkd1	7.29011e-23	0.231099	0.083	0.049	1.16029e-18		Cxcl2	1.05489e-05	0.217277	0.003	0.001	0.167896		Idh3b	0	0.252332	0.736	0.258	0
Sppl3	3.56464e-15	0.230842	0.173	0.268	5.67349e-11		Azin1	2.81387e-07	0.216664	0.365	0.385	0.00447855		Polr2c	3.2729e-270	0.251695	0.794	0.344	5.20916e-266
Ttc19	0.000113636	0.230719	0.193	0.259	1		Cysltr2	1.02557e-05	0.216622	0.172	0.154	0.16323		Rab1b	0	0.2515	0.626	0.166	0
Lpp	0.0796331	0.230624	0.113	0.115	1		Sacs	6.86981e-10	0.216099	0.216	0.194	1.0934e-05		H3f3a	7.20761e-213	0.251241	1	0.973	1.14716e-208
Rspry1	1.15891e-19	0.230493	0.176	0.284	1.84453e-15		Wsb2	1.01749e-10	0.216043	0.24	0.22	1.61944e-06		Stxbp2	0	0.251192	0.529	0.112	0
Leng8	8.37744e-16	0.230361	0.179	0.28	1.33335e-11		Ccdc137	4.98883e-82	0.215949	0.132	0.048	7.94022e-78		Nmral1	0	0.251143	0.275	0.008	0
Sel1l	1.22638e-09	0.229998	0.144	0.21	1.95191e-05		Ada	0.000328747	0.215822	0.145	0.188	1		Smarcc1	3.99316e-272	0.250904	0.68	0.292	6.35552e-268
Slc20a1	3.05394e-16	0.229181	0.196	0.306	4.86065e-12		Seh1l	1.23017e-12	0.215571	0.278	0.259	1.95794e-08		Hist1h4h	0	0.250887	0.228	0.009	0
Thra	1.61921e-32	0.229162	0.074	0.035	2.57713e-28		Creg1	6.10631e-21	0.215332	0.284	0.239	9.71881e-17		Trabd	0	0.250588	0.693	0.222	0
Dennd2d	4.67321e-05	0.228995	0.122	0.163	0.743789		Traf1	0.00914187	0.215126	0.406	0.509	1		Epn1	0	0.250556	0.564	0.131	0
Ccdc102a	1.62474e-14	0.228936	0.085	0.058	2.58593e-10		Fam185a	1.14724e-53	0.214651	0.128	0.059	1.82594e-49		Eif2a	0	0.250269	0.602	0.176	0
Ier3ip1	3.41125e-12	0.228768	0.376	0.605	5.42935e-08		Ergic2	3.0673e-12	0.214531	0.375	0.378	4.88191e-08		E2f4	0	0.25019	0.614	0.189	0
Ldah	6.12496e-21	0.228738	0.187	0.304	9.74849e-17		Crls1	3.07545e-17	0.214454	0.196	0.159	4.89488e-13		Tor2a	0	0.250072	0.604	0.146	0
Smad4	2.7171e-13	0.22849	0.166	0.251	4.32454e-09		Ddx24	3.49547e-30	0.214355	0.756	0.731	5.56339e-26		Mcrs1	0	0.249796	0.556	0.126	0
Zfp445	1.5206e-11	0.228484	0.194	0.289	2.42019e-07		Erap1	9.26903e-14	0.214339	0.357	0.344	1.47526e-09		Hat1	3.64804e-275	0.249469	0.57	0.223	5.80622e-271
Trbc2	1.99026e-47	0.22829	0.979	0.975	3.1677e-43		Pde12	1.85552e-09	0.21425	0.232	0.217	2.95325e-05		Snrnp40	5.77172e-235	0.249404	0.777	0.361	9.18627e-231
Card11	4.71534e-22	0.228019	0.167	0.275	7.50493e-18		Gbp2	1.69455e-98	0.214214	0.141	0.341	2.69704e-94		Pcmt1	3.51763e-260	0.249355	0.745	0.33	5.59865e-256
Gna13	4.15539e-22	0.227931	0.264	0.436	6.61371e-18		Rrn3	4.05996e-30	0.213923	0.196	0.135	6.46183e-26		Zbtb32	0	0.24933	0.203	0.002	0
Nod1	9.10475e-05	0.227898	0.097	0.13	1		Mrps7	5.56145e-14	0.213809	0.411	0.418	8.8516e-10		Tlk1	0	0.249275	0.646	0.18	0
Acoxl	1.10459e-10	0.227776	0.088	0.065	1.75807e-06		Rpl5	1.1381e-170	0.213306	0.996	0.999	1.81141e-166		Ptpn7	0	0.248884	0.865	0.354	0
Clcn3	2.19275e-19	0.227699	0.201	0.32	3.48998e-15		Dnaja3	2.67471e-25	0.212679	0.194	0.14	4.25707e-21		Dscc1	0	0.248871	0.262	0.004	0
Trbc1	0.275842	0.227668	0.615	0.697	1		Ubash3b	0.880493	0.212664	0.235	0.271	1		Necap2	0	0.248626	0.62	0.17	0
Cep164	3.41744e-09	0.227636	0.124	0.18	5.4392e-05		Golt1b	3.151e-13	0.212557	0.237	0.212	5.01513e-09		Apip	0	0.248496	0.379	0.04	0
Bmt2	0.0843718	0.227425	0.095	0.095	1		Cxcl9	7.41642e-36	0.212298	0.022	0.003	1.1804e-31		Emd	0	0.248297	0.657	0.215	0
Pacsin1	3.7779e-06	0.227279	0.119	0.105	0.0601291		Supt6	9.54093e-09	0.211833	0.339	0.341	0.000151853		Ociad1	0	0.248285	0.75	0.275	0
Mllt10	5.21308e-22	0.227115	0.19	0.31	8.29714e-18		Nipa2	5.49e-10	0.211718	0.315	0.309	8.73788e-06		BC004004	0	0.247754	0.55	0.124	0
Cdkal1	0.00171122	0.226866	0.122	0.157	1		Nfe2l1	1.9792e-21	0.211513	0.21	0.16	3.15009e-17		Mms22l	0	0.247564	0.303	0.02	0
D16Ertd472e	8.0352e-07	0.226854	0.391	0.586	0.0127888		Rpf1	1.34824e-12	0.210058	0.347	0.344	2.14586e-08		Riok3	0	0.247556	0.644	0.199	0
Ubac2	4.70185e-17	0.226745	0.312	0.508	7.48346e-13		Rpia	1.09008e-09	0.209993	0.289	0.281	1.73497e-05		Tsn	9.89779e-189	0.247461	0.88	0.481	1.57533e-184
Cdkn2aip	1.46649e-16	0.226678	0.145	0.228	2.33407e-12		Prrc2a	1.41903e-10	0.209633	0.41	0.426	2.25853e-06		Pnkp	0	0.247305	0.526	0.113	0
Epm2aip1	0.076772	0.226359	0.124	0.15	1		Coq10b	1.04907e-32	0.209539	0.311	0.238	1.6697e-28		Cops6	6.74636e-240	0.247275	0.822	0.383	1.07375e-235
Napg	6.41576e-20	0.226347	0.16	0.258	1.02113e-15		Timm13	4.76567e-23	0.208929	0.759	0.722	7.58504e-19		Pbk	0	0.247109	0.228	0.001	0
Slc27a6	2.31369e-116	0.226336	0.06	0.004	3.68247e-112		Utp3	1.20233e-19	0.208659	0.582	0.579	1.91362e-15		Gemin7	0	0.246733	0.624	0.173	0
Gimap7	4.06889e-16	0.226207	0.7	0.7	6.47605e-12		Eaf1	2.20109e-41	0.208648	0.176	0.104	3.50325e-37		Ccnh	0	0.246531	0.656	0.188	0
Arid1b	0.0112874	0.225952	0.129	0.161	1		Riox2	6.76271e-05	0.208357	0.25	0.256	1		Sart1	0	0.246414	0.665	0.223	0
Top2b	0.000112906	0.225889	0.398	0.588	1		Rabep1	1.59229e-16	0.208198	0.246	0.207	2.53429e-12		Il3ra	0	0.246335	0.295	0.023	0
Cpne3	0.796128	0.225825	0.101	0.109	1		Snx5	3.44773e-13	0.208029	0.504	0.519	5.4874e-09		Plekho1	0	0.24621	0.241	0.013	0
9930021J03Rik	0.207864	0.225791	0.13	0.153	1		Nudt4	0.000101661	0.207689	0.313	0.328	1		Phf11c	0	0.246084	0.289	0.028	0
Nbeal2	7.65287e-24	0.225548	0.161	0.27	1.21803e-19		Slc5a6	6.18751e-127	0.207568	0.113	0.024	9.84804e-123		Kremen2	0	0.245662	0.249	0.01	0
Wasl	0.00542756	0.225518	0.137	0.173	1		Gm26571	4.58408e-183	0.207125	0.099	0.009	7.29602e-179		Sapcd2	0	0.245636	0.229	0.001	0
Dnajb1	3.55393e-17	0.225465	0.234	0.371	5.65643e-13		Gnl3l	3.03086e-13	0.207093	0.223	0.192	4.82392e-09		Map2k2	2.46936e-254	0.245362	0.851	0.393	3.93023e-250
Dpp8	1.36765e-23	0.225408	0.205	0.339	2.17675e-19		Mrm3	5.55917e-39	0.207026	0.148	0.085	8.84797e-35		Rbm38	0	0.245227	0.675	0.239	0
Emc10	3.56948e-14	0.22536	0.344	0.558	5.68119e-10		Mnt	2.75064e-28	0.206506	0.173	0.116	4.37791e-24		Tmed3	0	0.244868	0.574	0.143	0
Sept6	0.633825	0.225348	0.49	0.678	1		Hacd2	4.11922e-13	0.206478	0.22	0.193	6.55615e-09		Brk1	5.51384e-160	0.244718	0.952	0.571	8.77583e-156
Dedd2	3.91697e-11	0.225337	0.132	0.197	6.23425e-07		Rbm15	4.33861e-15	0.206236	0.228	0.194	6.90533e-11		Rex1bd	2.78969e-295	0.244559	0.812	0.343	4.44007e-291
Ddx3y	4.41685e-13	0.225335	0.258	0.39	7.02985e-09		Tex10	6.71351e-16	0.205947	0.212	0.175	1.06852e-11		Gpcpd1	0	0.244504	0.492	0.108	0
Pip4k2b	1.48101e-07	0.225293	0.124	0.175	0.00235717		Dgkh	1.37046e-42	0.205899	0.109	0.052	2.18123e-38		Taf10	9.96913e-152	0.244106	0.971	0.699	1.58669e-147
Atn1	3.31778e-08	0.225106	0.099	0.08	0.000528057		Far1	3.82044e-05	0.205475	0.226	0.228	0.608062		Med8	0	0.244083	0.73	0.273	0
Jade2	0.316269	0.225094	0.122	0.142	1		Cse1l	3.54722e-09	0.205255	0.2	0.182	5.64576e-05		Rgs19	0	0.244046	0.621	0.173	0
R3hdm2	3.23361e-20	0.225046	0.165	0.268	5.14662e-16		Vps37b	0.656879	0.203766	0.24	0.264	1		Serhl	0	0.243955	0.357	0.038	0
Kdm3b	3.21035e-20	0.225029	0.158	0.256	5.10959e-16		Spout1	1.05594e-18	0.20354	0.177	0.135	1.68063e-14		Trbc1	1.97819e-37	0.243883	0.749	0.614	3.14849e-33
Rnf14	7.66986e-14	0.224956	0.14	0.214	1.22073e-09		Ap1ar	9.1791e-10	0.202294	0.242	0.225	1.46095e-05		Rps27l	4.94124e-148	0.243845	0.928	0.587	7.86448e-144
Cetn2	1.97783e-17	0.224895	0.312	0.51	3.14791e-13		Ampd2	4.06603e-43	0.20208	0.135	0.071	6.4715e-39		Lair1	0	0.24322	0.256	0.004	0
Mllt6	1.72023e-08	0.224326	0.173	0.245	0.000273793		Adora2a	7.37153e-09	0.201375	0.235	0.217	0.000117325		Trir	1.53314e-142	0.243129	0.954	0.66	2.44015e-138
Golgb1	1.10638e-21	0.224189	0.186	0.302	1.76092e-17		Hnrnpm	1.95537e-21	0.201174	0.692	0.663	3.11216e-17		Etfa	0	0.2425	0.649	0.204	0
Fam168a	0.0391083	0.224003	0.088	0.085	1		Pfas	9.13714e-27	0.200867	0.121	0.073	1.45427e-22		Glod4	0	0.242217	0.609	0.159	0
Ppp1r13b	0.00897612	0.223567	0.105	0.101	1		Trim27	5.13585e-14	0.200721	0.437	0.442	8.17422e-10		Atxn1	0	0.242012	0.435	0.076	0
Fut8	0.000749176	0.223244	0.115	0.149	1		Galk1	5.83952e-09	0.200036	0.216	0.199	9.29418e-05		Lsm8	2.99324e-292	0.241957	0.719	0.295	4.76404e-288
Lgals8	8.74537e-05	0.223147	0.119	0.159	1		Eef1b2	6.17635e-108	0.199885	0.994	0.995	9.83029e-104		Sem1	5.98108e-158	0.241591	0.986	0.766	9.51949e-154
B4galnt1	1.66957e-09	0.223103	0.638	0.811	2.65729e-05		Eif4g2	1.03184e-29	0.199855	0.797	0.779	1.64228e-25		Arpc5l	6.61649e-232	0.241535	0.905	0.451	1.05308e-227
Rbm6	5.38767e-24	0.223054	0.252	0.417	8.57501e-20		Isg20l2	1.34126e-11	0.199588	0.215	0.189	2.13475e-07		E2f1	0	0.241369	0.24	0.007	0
Synj2bp	2.82515e-20	0.223051	0.285	0.465	4.49651e-16		Nemf	3.7829e-12	0.199431	0.414	0.413	6.02087e-08		Pet100	0	0.241089	0.522	0.114	0
Ubr1	2.84962e-07	0.222809	0.137	0.191	0.00453545		Gorasp2	2.56882e-06	0.199377	0.255	0.255	0.0408853		Laptm5	3.07897e-160	0.240879	0.997	0.732	4.9005e-156
Tmem64	0.466713	0.222754	0.205	0.229	1		Srrm1	5.25686e-20	0.1993	0.678	0.665	8.36682e-16		Mcm10	0	0.240641	0.244	0.001	0
Sgk3	3.36531e-35	0.222505	0.076	0.035	5.35623e-31		Tnip2	9.18364e-52	0.199012	0.116	0.052	1.46167e-47		Pttg1	0	0.240414	0.625	0.175	0
L3mbtl3	0.0908553	0.222496	0.093	0.093	1		Med29	6.96724e-12	0.198671	0.337	0.332	1.10891e-07		Ints11	0	0.240266	0.568	0.151	0
Xpc	0.121941	0.222106	0.119	0.143	1		Snrpa	2.86313e-11	0.198432	0.442	0.451	4.55696e-07		Crlf2	5.89308e-302	0.240235	0.769	0.319	9.37943e-298
Pcbp2	8.13193e-10	0.22164	0.642	0.844	1.29428e-05		2900097C17Rik	1.09319e-16	0.198358	0.28	0.24	1.73992e-12		Hnrnpul1	0	0.240125	0.662	0.207	0
1600014C10Rik	0.000940465	0.221624	0.11	0.142	1		Rnf7	1.10911e-18	0.198336	0.568	0.581	1.76526e-14		Ndufb6	2.25465e-249	0.24012	0.802	0.359	3.5885e-245
Ttc5	9.56343e-26	0.221516	0.203	0.341	1.52212e-21		Thoc1	7.80275e-15	0.198241	0.224	0.191	1.24189e-10		Tpst2	1.80581e-272	0.239938	0.844	0.378	2.87413e-268
Ifi206	1.82419e-25	0.221285	0.221	0.364	2.90338e-21		D17Wsu92e	1.41191e-09	0.198208	0.291	0.282	2.2472e-05		Cenpb	0	0.239884	0.574	0.156	0
Tbc1d4	2.19794e-05	0.221219	0.186	0.25	0.349825		Atg16l1	7.88806e-18	0.198183	0.196	0.152	1.25546e-13		Kif21b	0	0.239883	0.591	0.153	0
Dnase2a	3.18652e-08	0.221169	0.121	0.173	0.000507166		Prep	9.47432e-12	0.197785	0.163	0.135	1.50793e-07		Ubb	9.30679e-109	0.239828	1	0.994	1.48127e-104
Arsb	1.00253e-26	0.221168	0.251	0.422	1.59563e-22		Chchd1	4.6282e-16	0.197767	0.576	0.584	7.36624e-12		Gtf2f1	0	0.239277	0.625	0.194	0
Trim14	0.0331283	0.221056	0.101	0.124	1		Hivep1	1.37019e-24	0.197691	0.155	0.104	2.18079e-20		Ost4	1.27066e-198	0.23902	0.866	0.445	2.02238e-194
Mbtps1	4.18632e-13	0.22078	0.16	0.242	6.66295e-09		Sf1	5.42812e-12	0.197553	0.443	0.451	8.63939e-08		Kdelr1	0	0.238343	0.631	0.172	0
Immp1l	2.64699e-26	0.220738	0.234	0.398	4.21296e-22		Tex2	1.44446e-38	0.197452	0.159	0.088	2.29901e-34		Gps2	0	0.238133	0.527	0.111	0
Usp8	6.16162e-24	0.220674	0.171	0.286	9.80684e-20		Trmt11	2.38286e-17	0.197451	0.181	0.14	3.79257e-13		Pqlc3	0	0.238132	0.3	0.022	0
Fundc1	6.56025e-10	0.220562	0.134	0.196	1.04413e-05		Nup43	2.05037e-09	0.197355	0.211	0.194	3.26336e-05		Kpna2	0	0.237958	0.255	0.047	0
Trim21	3.25227e-08	0.220515	0.123	0.175	0.000517632		Cltb	2.28948e-06	0.197226	0.256	0.248	0.0364394		Parp9	0	0.237768	0.551	0.134	0
Mtmr1	1.47203e-07	0.220507	0.114	0.161	0.00234288		Pafah1b2	3.81177e-12	0.197059	0.323	0.311	6.06682e-08		Nkg7	4.33997e-94	0.237761	0.93	0.794	6.9075e-90
Mphosph8	6.04519e-20	0.220457	0.307	0.495	9.62152e-16		Smarca5	2.63201e-18	0.196844	0.683	0.649	4.18911e-14		Dapk3	0	0.237107	0.56	0.136	0
Marc2	0.0161128	0.220099	0.406	0.595	1		Ube2o	5.0548e-39	0.196822	0.131	0.071	8.04523e-35		Tstd3	0	0.237034	0.363	0.048	0
Mvb12b	0.160499	0.219986	0.101	0.12	1		Atf6	1.79153e-16	0.196733	0.176	0.135	2.8514e-12		Nosip	0	0.236965	0.483	0.092	0
Rev3l	4.08396e-10	0.219809	0.146	0.212	6.50003e-06		Gde1	6.4939e-07	0.196538	0.292	0.298	0.0103357		Ehd4	0	0.236734	0.393	0.07	0
Gm26759	3.47276e-36	0.219461	0.064	0.026	5.52725e-32		Rc3h1	2.23967e-19	0.196273	0.264	0.215	3.56465e-15		Ssrp1	8.79839e-160	0.236729	0.787	0.442	1.40035e-155
Rab11fip1	0.053948	0.219409	0.124	0.15	1		Prdx1	3.84598e-32	0.196225	0.866	0.784	6.12126e-28		Apool	0	0.236543	0.419	0.066	0
Tex2	7.07847e-08	0.219381	0.119	0.099	0.00112661		Elmo1	5.11319e-10	0.196133	0.432	0.446	8.13815e-06		Mybl2	0	0.236534	0.24	0.001	0
Cast	2.29145e-15	0.219225	0.335	0.533	3.64708e-11		Polr2k	3.90626e-12	0.195924	0.448	0.462	6.21721e-08		Hras	0	0.236339	0.697	0.256	0
Med13l	2.24973e-08	0.2192	0.128	0.182	0.000358067		Appbp2	1.00767e-08	0.195472	0.273	0.262	0.000160381		Ap3s1	0	0.235929	0.737	0.277	0
C87436	2.6892e-09	0.219183	0.133	0.192	4.28014e-05		Stat6	8.07124e-12	0.195413	0.255	0.229	1.28462e-07		Aff3	0	0.235875	0.212	0.009	0
Unc50	5.48597e-26	0.219122	0.255	0.435	8.73148e-22		Ffar2	3.65198e-75	0.19536	0.084	0.022	5.81249e-71		Rpl24	9.12042e-200	0.235702	1	0.994	1.45161e-195
Phf2	2.58895e-06	0.218898	0.109	0.15	0.0412058		Hnrnpk	2.08052e-38	0.195095	0.931	0.885	3.31135e-34		Ska2	0	0.235648	0.301	0.022	0
Rere	0.682745	0.218809	0.093	0.104	1		Ttc39b	0.0023707	0.194809	0.324	0.355	1		Mrpl14	0	0.235618	0.698	0.213	0
Mmgt2	9.7926e-17	0.218767	0.134	0.212	1.55859e-12		Sik1	5.38683e-108	0.194774	0.109	0.026	8.57368e-104		Mrpl41	0	0.235223	0.713	0.253	0
Washc2	5.64939e-23	0.218652	0.163	0.269	8.99157e-19		Mga	1.18537e-18	0.194771	0.312	0.265	1.88663e-14		Gnas	1.06252e-161	0.235054	0.997	0.896	1.6911e-157
Rufy2	0.0263886	0.218269	0.111	0.137	1		Tnfrsf1b	1.84113e-07	0.194637	0.206	0.188	0.00293034		Car5b	0	0.234406	0.223	0.001	0
Epc1	6.83343e-17	0.218214	0.163	0.256	1.08761e-12		Ddx49	2.68794e-06	0.194488	0.251	0.25	0.0427813		Kif18a	0	0.23395	0.24	0.007	0
Dopey1	0.059496	0.218202	0.114	0.137	1		Nudcd1	2.03616e-13	0.194258	0.151	0.118	3.24076e-09		Mlec	9.78609e-272	0.233902	0.824	0.366	1.55755e-267
Irf3	2.72483e-26	0.21811	0.226	0.381	4.33684e-22		Shq1	6.61118e-40	0.193575	0.123	0.064	1.05224e-35		Zdhhc2	0	0.233806	0.264	0.009	0
Kdsr	0.0103057	0.218055	0.14	0.175	1		Senp3	1.06609e-14	0.193484	0.172	0.136	1.69679e-10		Sass6	0	0.233798	0.303	0.022	0
Orai2	5.50187e-06	0.217812	0.127	0.174	0.0875677		Ddx3y	2.3858e-11	0.193093	0.356	0.34	3.79724e-07		Ddx52	0	0.233658	0.541	0.128	0
Foxo1	3.32544e-11	0.217767	0.165	0.243	5.29277e-07		Nsfl1c	1.65464e-09	0.193068	0.399	0.418	2.63352e-05		Slc43a3	0	0.233006	0.252	0.005	0
Iffo2	5.11233e-12	0.217742	0.086	0.062	8.13678e-08		Ppp2r1b	4.35676e-25	0.192899	0.168	0.116	6.93422e-21		Cenpl	0	0.232992	0.262	0.017	0
Traf3ip3	0.0113751	0.217727	0.408	0.577	1		Srpk1	2.85711e-21	0.192888	0.722	0.707	4.54737e-17		Crybg1	0	0.2326	0.454	0.092	0
Dtx3l	5.44453e-24	0.217482	0.18	0.298	8.66551e-20		Dlst	4.90866e-09	0.192519	0.33	0.325	7.81262e-05		Rbl1	0	0.232459	0.321	0.029	0
Suco	6.16246e-08	0.217412	0.191	0.268	0.000980816		Abhd11	1.10553e-18	0.192386	0.18	0.138	1.75957e-14		Klhl6	0	0.232458	0.562	0.145	0
Specc1l	8.54362e-06	0.217391	0.119	0.162	0.13598		Pdcd6	5.19793e-20	0.191559	0.627	0.639	8.27303e-16		Brca2	0	0.232351	0.257	0.012	0
Arhgap25	7.9952e-29	0.217171	0.166	0.287	1.27252e-24		Ibtk	9.84807e-10	0.19114	0.195	0.171	1.56742e-05		Lcmt1	0	0.232206	0.445	0.075	0
Sec11c	4.57824e-30	0.217105	0.773	0.84	7.28673e-26		Tspan5	4.92841e-11	0.191073	0.184	0.157	7.84406e-07		Bckdk	0	0.232128	0.445	0.077	0
Psenen	0.0485188	0.216698	0.532	0.729	1		Tnpo3	1.4561e-07	0.190231	0.316	0.314	0.00231753		Nol12	0	0.231815	0.633	0.212	0
Ifnar2	2.22164e-18	0.216562	0.185	0.293	3.53596e-14		Pigm	5.36542e-24	0.190209	0.182	0.129	8.53961e-20		Ccdc25	0	0.231695	0.537	0.134	0
Rpl10-ps3	1.86288e-12	0.216465	0.19	0.284	2.96496e-08		Dynll2	3.04194e-10	0.190074	0.42	0.427	4.84155e-06		Ppp4c	8.75651e-254	0.231647	0.803	0.36	1.39369e-249
Abca1	7.02888e-44	0.216456	0.076	0.03	1.11872e-39		Tgs1	6.06645e-07	0.189063	0.276	0.27	0.00965536		Asnsd1	0	0.231376	0.543	0.127	0
Arfgap2	5.61745e-27	0.216439	0.224	0.378	8.94073e-23		Rcc1l	2.61581e-26	0.188932	0.132	0.083	4.16332e-22		Ube2e3	0	0.231257	0.526	0.147	0
Pgm2l1	0.0455062	0.216337	0.095	0.115	1		Ccr4	9.16878e-30	0.188901	0.088	0.043	1.4593e-25		Gimap9	2.26569e-213	0.231243	0.945	0.523	3.60607e-209
Ppp6r1	4.51989e-34	0.216308	0.216	0.381	7.19386e-30		Fam136a	8.56977e-09	0.188853	0.236	0.218	0.000136397		Cd3d	3.49305e-125	0.230941	0.999	0.934	5.55954e-121
Zscan26	0.234185	0.216228	0.095	0.098	1		Hgh1	7.08894e-43	0.188711	0.127	0.064	1.12828e-38		Pole	0	0.230907	0.255	0.007	0
Arid5a	0.0194025	0.215837	0.134	0.166	1		Clcf1	3.197e-43	0.188639	0.159	0.086	5.08835e-39		Trim5	0	0.230883	0.33	0.042	0
Vps37b	1.29682e-05	0.215685	0.209	0.284	0.206401		Fndc3a	5.2476e-15	0.188563	0.204	0.164	8.35209e-11		Mdp1	0	0.230813	0.735	0.247	0
Slain1	2.04377e-14	0.21562	0.13	0.202	3.25287e-10		Ogt	3.42595e-24	0.188423	0.73	0.748	5.45275e-20		Dctn6	0	0.230617	0.64	0.177	0
Atraid	5.67354e-29	0.215464	0.202	0.346	9.03001e-25		Atp5g1	1.21066e-20	0.188423	0.823	0.788	1.92689e-16		Podnl1	0	0.230441	0.768	0.29	0
Prpf38b	0.461113	0.215406	0.491	0.72	1		Ddx31	1.3712e-30	0.188294	0.135	0.08	2.18241e-26		Mtmr14	0	0.230198	0.325	0.032	0
Rnf6	9.94737e-25	0.215384	0.215	0.359	1.58322e-20		Prpf38b	1.94061e-19	0.18827	0.629	0.643	3.08867e-15		Oas3	0	0.230049	0.312	0.041	0
Yipf4	3.8978e-21	0.215253	0.289	0.48	6.20374e-17		Ciapin1	2.47733e-08	0.187831	0.293	0.291	0.000394292		Pold1	0	0.229082	0.329	0.034	0
Atp11b	1.56187e-24	0.215027	0.302	0.506	2.48587e-20		Ufm1	7.91085e-10	0.187704	0.423	0.441	1.25909e-05		Tceal9	0	0.228976	0.477	0.101	0
Akap11	0.0386558	0.214982	0.108	0.132	1		Faap100	4.75916e-26	0.187702	0.125	0.077	7.57468e-22		Snx6	0	0.228454	0.72	0.242	0
Gbp7	0.0010203	0.214912	0.393	0.556	1		Abtb2	1.04297e-14	0.187565	0.126	0.091	1.66e-10		Rpl18	2.43461e-264	0.228181	1	1	3.87492e-260
Tmx2	1.29592e-10	0.214751	0.122	0.18	2.06259e-06		Fosl1	7.36609e-208	0.187317	0.08	0.001	1.17239e-203		Chchd10	0	0.227949	0.435	0.128	0
Ndufa10	1.4357e-05	0.21454	0.403	0.616	0.228506		Gtf2e2	8.30235e-06	0.187298	0.26	0.264	0.13214		Itm2b	1.70822e-136	0.22771	1	0.906	2.7188e-132
Elk4	8.97553e-22	0.21446	0.234	0.38	1.42855e-17		Exosc1	2.47042e-06	0.187146	0.262	0.259	0.0393192		B230219D22Rik	0	0.2277	0.639	0.198	0
Cd44	0.00580184	0.214219	0.422	0.614	1		Carm1	9.11307e-28	0.187051	0.124	0.075	1.45044e-23		Ifi35	0	0.227449	0.694	0.243	0
Tbca	2.50923e-08	0.214037	0.613	0.84	0.000399368		Insig1	1.47828e-17	0.18686	0.15	0.109	2.35283e-13		Mapre2	0	0.227134	0.57	0.139	0
Wbp2	1.74114e-30	0.213947	0.207	0.357	2.7712e-26		Eif4a2	6.11732e-47	0.186718	0.687	0.649	9.73633e-43		Washc1	0	0.227097	0.466	0.088	0
Ccng1	1.32372e-21	0.213687	0.186	0.304	2.10684e-17		Cad	1.12052e-10	0.186103	0.144	0.118	1.78342e-06		Higd2a	0	0.226834	0.782	0.296	0
Zyg11b	1.87376e-07	0.213631	0.121	0.169	0.00298228		Ube2w	8.79774e-34	0.18597	0.211	0.14	1.40025e-29		Endod1	0	0.226626	0.297	0.026	0
Stim1	1.34128e-27	0.213577	0.233	0.396	2.13477e-23		Zfp622	2.39317e-14	0.185175	0.44	0.438	3.80896e-10		Psip1	1.82467e-243	0.22654	0.739	0.338	2.90415e-239
Gcc2	1.99702e-33	0.212809	0.232	0.404	3.17845e-29		Ptbp1	7.94971e-09	0.185033	0.498	0.513	0.000126528		Nelfcd	0	0.226477	0.412	0.06	0
Ythdf3	3.91094e-11	0.212775	0.159	0.233	6.22466e-07		Cstf3	0.000173541	0.184577	0.269	0.277	1		Mrpl48	0	0.226213	0.511	0.117	0
Nck2	0.0044241	0.212734	0.105	0.132	1		Gng5	6.85178e-26	0.184052	0.872	0.854	1.09053e-21		Ndufb3	1.34527e-238	0.226184	0.883	0.413	2.14113e-234
Uqcrh	3.74739e-41	0.212732	0.906	0.957	5.96435e-37		Amd2	4.67884e-50	0.184042	0.117	0.052	7.44684e-46		9930111J21Rik2	0	0.225891	0.754	0.263	0
Glg1	2.05938e-30	0.212503	0.176	0.305	3.27771e-26		Sec62	8.92222e-23	0.183476	0.651	0.67	1.42006e-18		Zcchc17	0	0.225735	0.695	0.229	0
Ice1	1.26145e-09	0.212502	0.158	0.227	2.00772e-05		Hnrnph2	2.21669e-10	0.183443	0.363	0.359	3.52809e-06		Psme2	5.15831e-145	0.225702	0.992	0.801	8.20997e-141
Ppp2r5a	8.58122e-08	0.212214	0.391	0.61	0.00136579		Zc3h12a	8.54064e-24	0.183412	0.157	0.105	1.35933e-19		Ptpn11	0	0.225696	0.575	0.169	0
Ctsb	0.0122857	0.212179	0.444	0.637	1		Mcl1	8.42422e-28	0.183379	0.769	0.773	1.3408e-23		Babam1	0	0.225683	0.566	0.145	0
Man1a2	1.37367e-26	0.212105	0.251	0.422	2.18633e-22		Napa	5.06121e-08	0.183156	0.36	0.372	0.000805543		Gpx4	8.78405e-214	0.225637	0.918	0.512	1.39807e-209
Rps10	1.07094e-236	0.212088	1	1	1.70451e-232		Ankrd28	2.61167e-40	0.18194	0.102	0.048	4.15674e-36		Cnih4	1.66071e-280	0.22545	0.662	0.268	2.64318e-276
Ganc	0.213993	0.211924	0.087	0.101	1		Man1a	7.98049e-06	0.18165	0.318	0.318	0.127017		Brca1	0	0.225356	0.23	0.003	0
Wbp1	6.89763e-11	0.211846	0.117	0.174	1.09783e-06		Zfp703	2.76637e-34	0.181637	0.107	0.055	4.40296e-30		Xpa	0	0.225205	0.577	0.138	0
Acot13	7.71631e-22	0.211757	0.162	0.267	1.22813e-17		Polr2e	3.04415e-09	0.181534	0.534	0.563	4.84507e-05		Ino80b	0	0.2249	0.415	0.067	0
Rabgap1	3.11264e-10	0.21169	0.123	0.181	4.95408e-06		Prpf40a	4.17633e-16	0.181411	0.675	0.666	6.64704e-12		Tbc1d7	0	0.224798	0.277	0.015	0
Smurf2	0.0171446	0.211468	0.1	0.097	1		Rpl15	4.37301e-107	0.180958	0.999	0.999	6.96009e-103		Cbx1	7.32279e-255	0.224542	0.744	0.331	1.16549e-250
Stt3b	2.62098e-21	0.211464	0.242	0.389	4.17155e-17		Lrrc58	1.13748e-08	0.180434	0.271	0.256	0.000181041		Arhgap1	0	0.224393	0.52	0.117	0
Spr	1.45463e-16	0.211414	0.162	0.254	2.31519e-12		Zbtb21	9.14767e-55	0.18034	0.106	0.043	1.45594e-50		Prkar1a	2.557e-148	0.22433	0.942	0.607	4.06972e-144
Man2a2	0.565439	0.2112	0.135	0.154	1		Prmt7	6.70507e-06	0.180177	0.179	0.167	0.106718		Hpcal1	0	0.224321	0.588	0.156	0
Gigyf2	4.053e-17	0.211197	0.222	0.347	6.45076e-13		Ubr5	7.25768e-08	0.180024	0.303	0.297	0.00115513		Klk1b9	0	0.224062	0.197	0	0
Tbx21	3.76911e-18	0.211114	0.296	0.47	5.99892e-14		Atg16l2	6.13823e-09	0.17978	0.167	0.144	9.76961e-05		Dpm3	0	0.223992	0.68	0.209	0
Fibp	6.90866e-29	0.211098	0.241	0.414	1.09958e-24		Gmppb	0.00018755	0.17969	0.209	0.209	1		Ndufs3	1.58994e-305	0.223594	0.795	0.321	2.53055e-301
Sh3bp5	2.92305e-22	0.210568	0.095	0.058	4.65233e-18		Pabpn1	5.57332e-11	0.179642	0.301	0.281	8.8705e-07		Ywhaz	2.06983e-151	0.223338	0.914	0.564	3.29435e-147
4932438H23Rik	1.2592e-66	0.210014	0.056	0.011	2.00414e-62		Pdxk	1.11551e-44	0.179205	0.128	0.064	1.77545e-40		Rala	0	0.223177	0.617	0.179	0
Nmb	4.68531e-12	0.209983	0.133	0.199	7.45714e-08		Pycrl	0.000179703	0.179204	0.197	0.194	1		Rab35	0	0.223156	0.619	0.176	0
Clock	0.431971	0.209921	0.101	0.115	1		Cand1	2.65424e-07	0.178957	0.235	0.222	0.00422448		Ndufaf3	0	0.222974	0.518	0.116	0
mt-Nd1	1.21721e-103	0.209715	0.994	0.999	1.93731e-99		Tfap4	4.9855e-43	0.178772	0.107	0.05	7.93492e-39		Mrps26	2.82902e-284	0.222473	0.769	0.319	4.50266e-280
Gm35363	1.27725e-22	0.20949	0.071	0.039	2.03287e-18		Cdc73	6.86964e-10	0.178646	0.27	0.251	1.09337e-05		Mlf2	0	0.222222	0.63	0.196	0
Rhobtb2	0.00569933	0.20934	0.084	0.077	1		Med1	1.01015e-08	0.17822	0.337	0.332	0.000160776		Trappc3	0	0.221796	0.626	0.172	0
Fbxw2	5.07528e-22	0.209294	0.33	0.557	8.07782e-18		Il9	4.53141e-05	0.177905	0.003	0	0.72122		Lin37	0	0.221566	0.434	0.074	0
Zfr	2.29054e-28	0.209191	0.22	0.373	3.64562e-24		Map2k3os	3.71248e-165	0.177687	0.081	0.006	5.90878e-161		Actr10	1.83109e-283	0.221362	0.828	0.351	2.91436e-279
Smc5	8.18991e-29	0.20893	0.182	0.312	1.30351e-24		Leo1	0.000304848	0.177638	0.271	0.282	1		Idh2	0	0.22095	0.439	0.085	0
Taf7	3.89842e-19	0.208596	0.212	0.336	6.20473e-15		Mcrip2	3.47305e-42	0.176772	0.096	0.043	5.52771e-38		Cuedc2	0	0.220858	0.486	0.102	0
Pdpk1	3.47648e-29	0.2085	0.188	0.324	5.53317e-25		Ets2	1.26905e-24	0.176731	0.103	0.06	2.01982e-20		Rcsd1	0	0.220434	0.764	0.281	0
Zfp654	1.65207e-07	0.208362	0.123	0.173	0.00262944		Mrps2	1.63801e-25	0.176565	0.132	0.084	2.60705e-21		Eif4h	4.45255e-172	0.220298	0.883	0.469	7.08667e-168
Efcab14	7.983e-20	0.208223	0.159	0.256	1.27057e-15		Zswim4	5.13415e-70	0.176015	0.094	0.03	8.17151e-66		Bad	0	0.220209	0.417	0.065	0
C730034F03Rik	0.000667426	0.208203	0.078	0.069	1		Gm44851	1.87136e-180	0.175699	0.07	0.001	2.97845e-176		Thap3	0	0.219524	0.526	0.124	0
AW549877	0.00519625	0.208176	0.088	0.082	1		Psmc4	5.11313e-15	0.174654	0.599	0.595	8.13805e-11		Ccs	0	0.219026	0.52	0.135	0
Cfap97	1.71723e-20	0.208131	0.142	0.232	2.73315e-16		Gid4	4.34577e-21	0.174461	0.172	0.122	6.91673e-17		Zfand2b	0	0.21863	0.468	0.09	0
Ddx17	1.66985e-22	0.20797	0.295	0.488	2.65774e-18		Mrpl32	1.17687e-12	0.174125	0.517	0.539	1.87311e-08		Rpl6	3.22742e-243	0.218479	1	0.998	5.13676e-239
Rab5b	7.12254e-07	0.207872	0.115	0.159	0.0113362		Zbtb11	0.000251568	0.173799	0.22	0.216	1		Rpl31	1.66488e-114	0.218307	0.993	0.83	2.64982e-110
Tpcn1	0.387012	0.207628	0.081	0.084	1		Tmem201	4.63775e-27	0.173721	0.11	0.063	7.38145e-23		A630023P12Rik	0	0.218164	0.358	0.063	0
Dido1	6.19481e-25	0.207403	0.232	0.385	9.85965e-21		Pdrg1	1.00618e-06	0.173571	0.394	0.412	0.0160143		Ppp2r5c	0	0.218102	0.702	0.228	0
Yme1l1	1.33018e-27	0.207348	0.282	0.483	2.11711e-23		Tmem5	3.15545e-14	0.17346	0.178	0.14	5.02222e-10		Marc2	6.4807e-301	0.217915	0.821	0.335	1.03147e-296
Casp8	2.99465e-12	0.207141	0.344	0.54	4.76629e-08		Tmem238	0.250648	0.173408	0.193	0.212	1		Prkd2	0	0.217863	0.517	0.109	0
Fbxw4	0.557169	0.207096	0.09	0.095	1		Parl	1.40836e-05	0.1733	0.379	0.41	0.224155		Lrrc8c	0	0.217726	0.494	0.115	0
D10Jhu81e	1.29623e-22	0.207054	0.172	0.284	2.06308e-18		Cers2	4.16184e-07	0.172776	0.364	0.379	0.00662398		Setx	0	0.2175	0.601	0.176	0
Zfp110	3.14547e-06	0.206964	0.104	0.143	0.0500634		Sh3bp2	2.12418e-37	0.172766	0.106	0.053	3.38085e-33		Top2b	1.50945e-301	0.2175	0.806	0.333	2.40243e-297
4930453N24Rik	1.88784e-18	0.206923	0.324	0.532	3.00469e-14		Birc3	3.30449e-05	0.172664	0.215	0.204	0.525942		Psmf1	0	0.217269	0.441	0.081	0
Pigs	6.11587e-15	0.206915	0.128	0.2	9.73403e-11		Hspa1b	4.83085e-74	0.172545	0.055	0.009	7.68878e-70		Xpnpep1	0	0.216955	0.414	0.071	0
Lats2	0.000610163	0.206877	0.078	0.068	1		B3galt6	4.37981e-26	0.172471	0.143	0.09	6.97091e-22		Cops4	0	0.216804	0.748	0.29	0
Pik3cg	0.00016053	0.206857	0.093	0.122	1		Tox4	5.67377e-10	0.172397	0.388	0.39	9.03037e-06		Tap2	3.29669e-221	0.21634	0.904	0.448	5.24701e-217
Galnt7	1.14565e-20	0.206801	0.146	0.238	1.82341e-16		Alg11	5.80103e-50	0.172082	0.133	0.064	9.23291e-46		Gm30054	0	0.215979	0.223	0.017	0
Rpl21	6.20132e-185	0.206548	0.999	0.999	9.87002e-181		Urb2	1.97458e-41	0.171564	0.094	0.042	3.14274e-37		Ptpra	0	0.215601	0.581	0.158	0
Rps11	4.44486e-163	0.206443	0.999	0.999	7.07443e-159		Hdgfl3	5.0238e-18	0.171416	0.14	0.097	7.99587e-14		Icam2	0	0.215549	0.515	0.122	0
Rarg	3.27272e-32	0.206338	0.073	0.034	5.20886e-28		Nmt2	4.34999e-09	0.171409	0.151	0.127	6.92345e-05		Hnrnpa1	7.28942e-117	0.215248	0.974	0.7	1.16018e-112
Mtif2	1.32388e-19	0.206136	0.153	0.247	2.10708e-15		Dctd	2.91282e-36	0.171314	0.103	0.051	4.63604e-32		Cmpk1	9.09182e-258	0.215232	0.809	0.354	1.44705e-253
Cnppd1	1.07399e-28	0.20592	0.171	0.295	1.70936e-24		Fam83g	8.3844e-102	0.1713	0.067	0.009	1.33446e-97		Sgta	0	0.215216	0.536	0.136	0
Cds2	4.6613e-26	0.205842	0.161	0.273	7.41893e-22		Amfr	1.73799e-05	0.171266	0.27	0.269	0.276618		Sh3glb2	0	0.21478	0.446	0.08	0
Enpp4	1.15709e-16	0.20573	0.078	0.049	1.84162e-12		Thoc3	9.80732e-05	0.171087	0.3	0.316	1		Vta1	0	0.214665	0.64	0.199	0
Ppm1b	2.86654e-20	0.205606	0.17	0.274	4.56238e-16		Gfm1	5.02937e-07	0.171083	0.203	0.191	0.00800474		Srp9	4.46052e-142	0.214525	0.973	0.7	7.09936e-138
Zc3h6	0.0606454	0.205577	0.077	0.074	1		Zdhhc13	1.34177e-61	0.170896	0.108	0.041	2.13556e-57		Atp6v0d1	0	0.213756	0.474	0.1	0
Slc35a5	0.0137263	0.205464	0.085	0.08	1		Myo10	5.71886e-142	0.170506	0.075	0.006	9.10214e-138		Ralbp1	0	0.213589	0.76	0.264	0
Ctcf	0.918067	0.205429	0.489	0.67	1		Hspa4l	0.723016	0.169248	0.127	0.137	1		Timm22	0	0.212689	0.588	0.161	0
Zfp260	5.72758e-10	0.205419	0.115	0.169	9.11601e-06		Gdap10	3.92102e-69	0.168932	0.091	0.028	6.24069e-65		Lactb	0	0.212409	0.45	0.092	0
Tbc1d23	0.0105154	0.205396	0.092	0.115	1		Sf3b4	0.000264833	0.168359	0.334	0.363	1		Rer1	2.21195e-132	0.212304	0.928	0.573	3.52054e-128
Rps27a	1.11036e-210	0.205329	0.999	1	1.76725e-206		Laptm4a	1.51742e-11	0.168346	0.381	0.372	2.41513e-07		Parp2	0	0.212219	0.447	0.088	0
Cd27	0.71012	0.205242	0.487	0.648	1		Slc35a4	0.00280863	0.167991	0.226	0.232	1		Ngly1	0	0.212152	0.522	0.123	0
4932438A13Rik	2.56136e-11	0.20516	0.297	0.446	4.07666e-07		Mbtd1	2.19429e-14	0.167872	0.212	0.172	3.49244e-10		Atxn10	0	0.212123	0.671	0.23	0
Zfp157	0.876935	0.205081	0.088	0.097	1		Rps6ka3	3.60299e-11	0.167834	0.311	0.286	5.73452e-07		Aifm1	0	0.21197	0.46	0.091	0
Med28	1.12056e-12	0.205059	0.376	0.61	1.78349e-08		Sdccag3	3.27267e-05	0.167795	0.265	0.268	0.520878		1600002K03Rik	0	0.211632	0.402	0.071	0
Nudt18	1.25605e-17	0.204713	0.127	0.205	1.99913e-13		Neto2	1.46725e-85	0.167679	0.077	0.017	2.33528e-81		Arhgap19	0	0.211553	0.212	0.003	0
Zranb1	2.89131e-22	0.20471	0.162	0.266	4.60181e-18		Usp39	0.0223891	0.167674	0.249	0.27	1		Ccr7	5.48973e-262	0.211466	0.171	0.02	8.73745e-258
Irgm2	0.0983769	0.20458	0.095	0.112	1		Slc7a6os	1.05202e-12	0.167447	0.225	0.191	1.6744e-08		Ywhaq	1.32709e-136	0.211106	0.896	0.551	2.1122e-132
Zer1	7.09481e-06	0.204417	0.11	0.15	0.112921		Tatdn2	1.52823e-06	0.167234	0.187	0.171	0.0243234		Amdhd2	0	0.211103	0.35	0.042	0
Zfp280d	4.22771e-16	0.204384	0.188	0.288	6.72882e-12		Phf5a	2.11163e-13	0.167074	0.606	0.588	3.36087e-09		Ddx28	0	0.211017	0.369	0.067	0
Bet1l	1.35302e-19	0.204321	0.143	0.231	2.15347e-15		Zbtb10	2.34908e-117	0.166844	0.089	0.015	3.7388e-113		Ptpn18	6.10807e-118	0.210664	0.999	0.869	9.7216e-114
Snapin	7.2209e-16	0.204202	0.134	0.21	1.14928e-11		Ptp4a2	1.93546e-20	0.166629	0.788	0.812	3.08048e-16		Calm2	3.01654e-70	0.210554	0.925	0.663	4.80113e-66
Fam49a	1.47558e-15	0.204052	0.121	0.191	2.34853e-11		Papd5	2.0668e-17	0.166603	0.181	0.138	3.28952e-13		Tmem163	0	0.210489	0.22	0.003	0
Camk1d	4.17148e-06	0.203704	0.127	0.172	0.0663933		Klhl21	8.80131e-45	0.166526	0.103	0.045	1.40082e-40		Gatad1	0	0.210478	0.666	0.226	0
Scaper	0.0115112	0.203687	0.099	0.123	1		Slk	0.749949	0.166508	0.298	0.349	1		Mettl23	2.52207e-170	0.210397	0.925	0.499	4.01413e-166
Dock10	8.72406e-05	0.203586	0.559	0.74	1		D10Wsu102e	0.000114334	0.166501	0.258	0.257	1		Zmat2	6.27106e-295	0.210325	0.769	0.312	9.98102e-291
Fuca1	1.89124e-32	0.203584	0.232	0.405	3.0101e-28		Fam84b	3.71885e-94	0.166462	0.081	0.016	5.91892e-90		Mrpl16	0	0.210222	0.653	0.229	0
Ing4	8.918e-32	0.203538	0.184	0.321	1.41939e-27		Pitrm1	4.56719e-07	0.166111	0.137	0.118	0.00726913		Casp4	0	0.210026	0.215	0.021	0
Rab8a	0.00984319	0.203501	0.447	0.648	1		Snrpd2	1.58172e-15	0.165732	0.803	0.749	2.51747e-11		Samd1	0	0.209889	0.353	0.075	0
Cant1	4.82546e-08	0.203334	0.106	0.151	0.00076802		Gm49336	2.03901e-09	0.16557	0.165	0.14	3.24529e-05		Med9	0	0.209871	0.434	0.08	0
Zc3h14	2.36222e-38	0.202964	0.208	0.375	3.75971e-34		Hipk2	5.18931e-44	0.165468	0.12	0.058	8.25931e-40		Plin3	0	0.209839	0.336	0.044	0
Mapk14	2.2012e-13	0.202944	0.125	0.191	3.50342e-09		Rps6kb1	3.39062e-08	0.165152	0.362	0.365	0.000539652		Cdc37	1.02315e-136	0.209494	0.952	0.585	1.62845e-132
Vps28	0.0872434	0.202883	0.529	0.708	1		Cdc34	0.00330055	0.16515	0.343	0.377	1		Aunip	0	0.209407	0.229	0	0
Tnfrsf25	3.58408e-10	0.202297	0.37	0.566	5.70443e-06		Suv39h2	2.20506e-21	0.16512	0.094	0.056	3.50958e-17		Cast	0	0.209265	0.752	0.272	0
Sidt2	1.20559e-26	0.202287	0.191	0.322	1.91882e-22		Arfrp1	1.74263e-06	0.16489	0.374	0.39	0.0277357		Eif4ebp1	0	0.208741	0.318	0.046	0
Gm26724	0.496723	0.20221	0.105	0.111	1		Smad7	1.35347e-18	0.164658	0.346	0.28	2.15418e-14		BC147527	0	0.208658	0.411	0.082	0
Eif4ebp2	1.16113e-27	0.202167	0.286	0.49	1.84805e-23		Fgfr1op	2.24086e-06	0.16427	0.152	0.136	0.0356656		Atp5g1	2.9595e-97	0.208413	0.96	0.688	4.71034e-93
Pigk	5.4601e-25	0.202116	0.156	0.263	8.6903e-21		Spry2	5.23723e-39	0.164026	0.064	0.023	8.33558e-35		Ube2i	2.65778e-117	0.207312	0.97	0.718	4.23012e-113
Smpdl3a	3.10571e-06	0.202078	0.539	0.623	0.0494304		Metrnl	4.54948e-24	0.163361	0.056	0.025	7.24095e-20		Eme1	0	0.206997	0.235	0.002	0
Msrb2	1.01857e-06	0.201981	0.079	0.063	0.0162116		Acaca	1.57404e-10	0.16335	0.132	0.104	2.50525e-06		Mrps34	0	0.206808	0.711	0.256	0
Nr1d2	1.48171e-25	0.201908	0.086	0.048	2.35829e-21		Rpl9-ps6	6.68957e-30	0.16334	0.303	0.226	1.06471e-25		Emg1	2.64688e-118	0.206733	0.965	0.652	4.21278e-114
2310033P09Rik	3.94383e-29	0.201837	0.202	0.344	6.277e-25		Klrc1	0.459016	0.163192	0.147	0.149	1		Uqcrh	1.26475e-147	0.206633	0.998	0.899	2.01297e-143
Zfp687	0.232889	0.201649	0.095	0.11	1		Elp5	0.0529418	0.163117	0.202	0.215	1		Akt1	0	0.206622	0.661	0.24	0
Klhl20	0.000162204	0.201466	0.097	0.128	1		Traf6	8.04316e-22	0.162808	0.126	0.081	1.28015e-17		Psmc4	1.22613e-168	0.20658	0.841	0.434	1.95151e-164
Stat4	4.19476e-21	0.201457	0.341	0.559	6.67638e-17		Ubap2l	4.88593e-08	0.162703	0.512	0.547	0.000777645		Ino80c	0	0.206074	0.367	0.057	0
Zfp329	3.88275e-20	0.201406	0.148	0.24	6.17978e-16		Pnpt1	1.40756e-05	0.162634	0.171	0.159	0.224027		Phf11a	0	0.205935	0.238	0.019	0
Zfp800	7.66798e-27	0.201353	0.243	0.406	1.22044e-22		Acsl3	2.39232e-62	0.161862	0.085	0.027	3.80761e-58		Rpa3	0	0.205876	0.585	0.182	0
Evi2a	1.82354e-22	0.201093	0.16	0.263	2.90234e-18		Prag1	1.54934e-47	0.161532	0.106	0.046	2.46593e-43		Pon2	0	0.204927	0.59	0.157	0
Fto	0.000762549	0.201045	0.117	0.151	1		Adam10	0.110575	0.161525	0.294	0.328	1		Actn4	0	0.204817	0.653	0.242	0
Clcn4	3.53348e-18	0.201022	0.158	0.251	5.62388e-14		Sap30	5.89073e-06	0.161298	0.151	0.137	0.0937568		Pop4	0	0.204775	0.432	0.08	0
Rplp2	1.75771e-145	0.200993	0.998	0.999	2.79757e-141		Prnp	1.07529e-126	0.161222	0.066	0.006	1.71143e-122		Iah1	0	0.20463	0.493	0.113	0
Svbp	2.3378e-28	0.200732	0.277	0.474	3.72084e-24		Ncoa4	3.32651e-08	0.161132	0.239	0.221	0.000529447		Pdia3	8.16057e-122	0.204114	0.957	0.713	1.29884e-117
Synrg	1.86316e-17	0.200624	0.131	0.209	2.96541e-13		Mob1b	2.44432e-07	0.160853	0.192	0.173	0.00389037		Stk19	0	0.203779	0.434	0.09	0
Zeb1	2.29395e-07	0.200493	0.228	0.317	0.00365105		Atf6b	0.000143828	0.160782	0.188	0.181	1		Them6	0	0.203762	0.318	0.039	0
Mob4	2.72173e-22	0.200469	0.31	0.519	4.3319e-18		Zfp827	4.07885e-47	0.16064	0.096	0.039	6.49191e-43		Ubxn1	4.51857e-154	0.203631	0.931	0.538	7.19175e-150
Ilvbl	3.98637e-20	0.200311	0.147	0.239	6.3447e-16		Nop9	0.00497412	0.160509	0.231	0.242	1		Usp14	0	0.20355	0.531	0.142	0
Stag2	2.36901e-25	0.200227	0.288	0.482	3.77051e-21		D16Ertd472e	8.06901e-07	0.160417	0.498	0.524	0.0128426		Rbm42	0	0.203378	0.755	0.278	0
Tax1bp1	0.027065	0.200207	0.572	0.772	1		Bud23	0.0130087	0.160275	0.33	0.37	1		Bcat2	0	0.203314	0.386	0.067	0
Fam214a	0.728825	0.200194	0.087	0.093	1		Isyna1	0.254241	0.160138	0.296	0.34	1		Mrps15	0	0.203073	0.728	0.281	0
Cpeb4	0.269489	0.199795	0.085	0.086	1		Erbin	0.00151301	0.159946	0.365	0.39	1		Fam103a1	0	0.202933	0.723	0.261	0
Vps13a	8.16114e-25	0.199558	0.226	0.372	1.29893e-20		Dcaf13	0.000376704	0.159889	0.346	0.373	1		B9d2	0	0.202932	0.498	0.124	0
Ranbp10	1.14383e-32	0.199433	0.164	0.289	1.82052e-28		Snapc4	4.86529e-44	0.159237	0.099	0.043	7.74359e-40		Smim8	0	0.202567	0.484	0.107	0
Rdh14	8.7292e-11	0.199333	0.129	0.191	1.38934e-06		Tor1b	6.70029e-09	0.1592	0.199	0.174	0.000106642		Rpl32	7.87912e-221	0.202001	1	0.999	1.25404e-216
Rbm24	1.64666e-97	0.199215	0.055	0.005	2.62082e-93		Wbp4	0.000310004	0.159073	0.397	0.431	1		Cytip	9.86245e-276	0.201967	0.833	0.357	1.56971e-271
C1galt1	7.729e-33	0.19867	0.195	0.342	1.23015e-28		Samd4	7.39651e-182	0.158823	0.068	0.001	1.17723e-177		Dpp4	0	0.201421	0.438	0.113	0
Pvr	0.00762373	0.198611	0.102	0.097	1		Nt5dc3	3.40394e-92	0.158488	0.084	0.018	5.41771e-88		Pola2	0	0.201322	0.308	0.034	0
Ift20	9.40637e-14	0.1986	0.373	0.599	1.49712e-09		Aqr	0.000134139	0.158463	0.35	0.371	1		Anapc4	0	0.201309	0.404	0.067	0
Ankrd54	5.45761e-27	0.198435	0.136	0.236	8.68633e-23		Atl2	4.99849e-13	0.158284	0.122	0.091	7.9556e-09		Psmg1	0	0.201046	0.52	0.147	0
Arhgap31	0.138983	0.19831	0.088	0.103	1		Alyref	5.02332e-17	0.158275	0.603	0.531	7.99511e-13		Mtx1	0	0.200948	0.505	0.135	0
Dyrk1a	3.35362e-18	0.197937	0.148	0.236	5.33762e-14		Qrich1	0.00366787	0.158125	0.276	0.289	1		Srsf4	0	0.20068	0.544	0.169	0
Atp6v1h	2.05216e-22	0.197885	0.178	0.291	3.26621e-18		Rnmt	0.000484676	0.158106	0.259	0.266	1		Haus1	0	0.200306	0.295	0.025	0
Bet1	7.94039e-26	0.197875	0.154	0.261	1.26379e-21		Slc12a2	5.77911e-22	0.157961	0.079	0.042	9.19803e-18		Klrb1f	0	0.20021	0.36	0.071	0
Gabbr1	6.5964e-05	0.19754	0.084	0.072	1		Etv3	5.21189e-15	0.157874	0.268	0.222	8.29525e-11		1810058I24Rik	1.68992e-240	0.200129	0.84	0.379	2.68968e-236
Plekha5	2.38326e-16	0.197466	0.11	0.175	3.7932e-12		Fastkd3	6.81245e-20	0.157799	0.117	0.077	1.08427e-15		Akip1	0	0.199937	0.325	0.037	0
Tbrg1	0.00558583	0.197234	0.453	0.676	1		Eftud2	0.00554061	0.157387	0.296	0.32	1		Polr1d	1.24661e-112	0.199831	0.993	0.783	1.98411e-108
1300002E11Rik	3.52079e-24	0.197164	0.139	0.234	5.6037e-20		Ctnnb1	3.95736e-08	0.157379	0.428	0.446	0.000629853		Rps17	7.71363e-120	0.199654	0.998	0.933	1.2277e-115
Tesc	0.095265	0.197022	0.434	0.598	1		Myo1e	0.000687089	0.1573	0.127	0.117	1		Dcaf15	0	0.199284	0.491	0.108	0
Pibf1	0.0034837	0.196983	0.105	0.132	1		Cdkn1a	3.15741e-55	0.156918	0.059	0.015	5.02534e-51		Pdcl3	0	0.199218	0.711	0.256	0
Hint3	2.51705e-33	0.196905	0.21	0.369	4.00613e-29		Vdac2	3.15799e-12	0.156507	0.786	0.743	5.02626e-08		Ggct	0	0.199045	0.513	0.12	0
Abi1	4.35976e-30	0.196829	0.211	0.362	6.939e-26		Nfkbie	6.44436e-08	0.156478	0.219	0.197	0.00102568		Sh3kbp1	3.21861e-236	0.198999	0.846	0.389	5.12273e-232
Vps13b	5.62842e-11	0.196668	0.117	0.174	8.9582e-07		Trp53rka	3.57129e-16	0.156226	0.138	0.099	5.68407e-12		Bora	0	0.198806	0.338	0.067	0
E130208F15Rik	7.20262e-53	0.196556	0.062	0.018	1.14637e-48		Gm32036	1.62239e-24	0.155878	0.118	0.07	2.5822e-20		Cep89	0	0.19855	0.222	0.013	0
Dync1h1	1.2899e-31	0.19645	0.179	0.313	2.053e-27		Trim28	0.0441719	0.155833	0.282	0.31	1		Cops3	0	0.198063	0.61	0.193	0
Ccser2	3.19809e-11	0.196313	0.103	0.154	5.09008e-07		Setd6	2.24393e-09	0.155806	0.132	0.106	3.57144e-05		Nfyb	0	0.197181	0.608	0.213	0
2510002D24Rik	4.25606e-28	0.196279	0.192	0.327	6.77395e-24		Tubb6	4.62553e-125	0.155194	0.062	0.004	7.36199e-121		Lxn	0	0.196701	0.302	0.037	0
Copa	5.61893e-33	0.196266	0.284	0.498	8.94309e-29		Senp2	3.04384e-07	0.155088	0.3	0.292	0.00484457		Crcp	0	0.196432	0.426	0.092	0
2610001J05Rik	1.51981e-31	0.196005	0.176	0.308	2.41893e-27		Zcchc10	1.21613e-05	0.155047	0.211	0.2	0.193559		Tmem120a	0	0.196134	0.321	0.04	0
BC037034	0.00107722	0.195614	0.098	0.126	1		Atxn2	5.1272e-16	0.154983	0.174	0.131	8.16045e-12		Kif18b	0	0.195911	0.201	0	0
Aamdc	3.49142e-17	0.195521	0.132	0.21	5.55694e-13		Eml4	6.02826e-06	0.154837	0.436	0.464	0.0959459		Uchl3	5.34269e-273	0.195751	0.7	0.283	8.50342e-269
Pou2f1	1.99026e-07	0.195332	0.122	0.17	0.00316769		Cry1	2.89579e-12	0.154601	0.161	0.129	4.60894e-08		Trpv2	0	0.195718	0.404	0.075	0
0610030E20Rik	1.78893e-38	0.195324	0.207	0.372	2.84726e-34		Cops7a	0.00513049	0.154554	0.226	0.233	1		Iigp1	3.37298e-294	0.195374	0.307	0.075	5.36844e-290
Gmip	6.53837e-26	0.195286	0.182	0.305	1.04065e-21		Fbxw7	0.0313249	0.154267	0.251	0.267	1		Haus8	0	0.195256	0.334	0.044	0
Arhgap17	2.4796e-06	0.195235	0.239	0.325	0.0394653		Polr2l	0.00393426	0.153997	0.186	0.188	1		Bri3bp	0	0.195195	0.387	0.084	0
Bicral	0.0666956	0.195173	0.084	0.1	1		Anp32b	5.43636e-36	0.1536	0.911	0.799	8.65251e-32		2410015M20Rik	5.82645e-152	0.194826	0.921	0.511	9.27338e-148
E230001N04Rik	1.69608e-14	0.19514	0.105	0.165	2.69948e-10		Rps27a	1.22095e-121	0.153555	1	1	1.94327e-117		Slc36a3os	0	0.194694	0.204	0.004	0
Cyth1	9.25171e-22	0.195135	0.229	0.37	1.4725e-17		Fastkd2	5.46086e-15	0.153496	0.125	0.091	8.69151e-11		Vps53	0	0.194687	0.516	0.134	0
Ggh	2.85264e-11	0.195006	0.114	0.17	4.54026e-07		Txnrd1	0.00333441	0.153467	0.432	0.48	1		Mff	0	0.194624	0.709	0.237	0
BC005624	2.7451e-29	0.194915	0.278	0.478	4.3691e-25		Pdcd5	6.14651e-09	0.153227	0.65	0.657	9.78278e-05		Ppp1r12a	1.34925e-160	0.194558	0.956	0.602	2.14747e-156
4933434E20Rik	1.47348e-28	0.194892	0.263	0.447	2.34519e-24		Rps25	2.212e-66	0.152771	0.993	0.992	3.52061e-62		Tada3	0	0.194416	0.408	0.072	0
Fam126b	0.680427	0.194773	0.077	0.081	1		N4bp2l2	2.88241e-11	0.152763	0.513	0.53	4.58764e-07		Smarcd2	0	0.194209	0.56	0.145	0
Rpl36a	2.47963e-44	0.194507	0.951	0.986	3.94658e-40		Ddx51	8.72572e-30	0.152704	0.11	0.061	1.38879e-25		Tpm1	0	0.194138	0.403	0.076	0
mt-Nd6	1.52697e-19	0.194471	0.172	0.275	2.43032e-15		Fcf1	0.000131296	0.15268	0.415	0.458	1		Mta3	0	0.194087	0.448	0.089	0
Ifit1	0.765127	0.194433	0.07	0.075	1		E2f5	2.88902e-61	0.152594	0.084	0.027	4.59817e-57		Rhoa	4.36043e-117	0.193939	0.987	0.783	6.94005e-113
Ubr2	5.1271e-33	0.194417	0.203	0.353	8.16029e-29		Zbed5	2.2423e-154	0.152497	0.066	0.003	3.56885e-150		Tmc6	0	0.193912	0.403	0.076	0
Cmc1	3.24027e-28	0.194353	0.278	0.474	5.15721e-24		Tacstd2	8.0404e-45	0.152486	0.038	0.008	1.27971e-40		Cmc1	0	0.193814	0.688	0.219	0
Tmem154	1.24099e-31	0.194154	0.236	0.405	1.97516e-27		Zfp280d	4.95734e-05	0.152441	0.258	0.251	0.789009		Miip	0	0.193502	0.368	0.065	0
Cdk8	4.42369e-15	0.194037	0.159	0.243	7.04074e-11		Wdr74	1.25727e-24	0.152133	0.097	0.055	2.00108e-20		Mir142hg	0	0.193445	0.341	0.057	0
Gm10073	9.59545e-08	0.193687	0.427	0.67	0.00152721		Nvl	0.041186	0.151621	0.238	0.253	1		Rb1	0	0.193444	0.372	0.064	0
Triap1	4.44289e-25	0.193633	0.164	0.277	7.0713e-21		Fxr2	2.44799e-07	0.151411	0.179	0.16	0.00389622		Mkrn1	3.78584e-294	0.19328	0.811	0.331	6.02555e-290
2310035C23Rik	2.84305e-24	0.193595	0.145	0.243	4.525e-20		Mtpap	2.5337e-06	0.15123	0.201	0.187	0.0403264		Rad50	0	0.1932	0.593	0.206	0
Ppp2r5c	6.40222e-28	0.193574	0.287	0.487	1.01898e-23		Actl6a	2.97039e-08	0.151204	0.482	0.504	0.000472768		Emc9	0	0.193149	0.282	0.034	0
Cd1d1	0.847951	0.193567	0.092	0.099	1		Cdr2	2.04343e-48	0.15115	0.084	0.032	3.25233e-44		Atp6v1f	3.28306e-115	0.193139	0.966	0.659	5.22531e-111
Tmem131	4.56964e-05	0.193463	0.114	0.152	0.727304		Ctsl	6.10545e-33	0.151117	0.066	0.026	9.71744e-29		Pafah1b1	1.59315e-172	0.193137	0.889	0.483	2.53566e-168
Hif1an	7.33813e-18	0.193451	0.134	0.214	1.16794e-13		Tmem183a	0.0396171	0.151107	0.233	0.25	1		Ssbp1	0	0.192937	0.736	0.282	0
Polr2a	2.0879e-19	0.193211	0.333	0.549	3.32311e-15		Cltc	0.000299685	0.151033	0.43	0.468	1		Ercc1	0	0.1929	0.413	0.088	0
Edem1	3.05681e-38	0.193101	0.206	0.37	4.86522e-34		Phrf1	0.0688723	0.150889	0.26	0.284	1		Med30	3.78331e-278	0.192813	0.717	0.289	6.02152e-274
Ep400	4.22267e-29	0.193046	0.256	0.436	6.7208e-25		Zcchc2	4.81732e-13	0.150161	0.171	0.134	7.66724e-09		Bard1	0	0.192781	0.22	0.004	0
Rnf5	4.15696e-24	0.193024	0.143	0.242	6.61622e-20		P4hb	0.215539	0.149932	0.331	0.376	1		Hadhb	0	0.192775	0.789	0.282	0
Aim2	2.3671e-12	0.192979	0.123	0.185	3.76748e-08		Serpine2	8.09024e-59	0.149787	0.038	0.005	1.28764e-54		Pnkd	0	0.192459	0.601	0.16	0
Abraxas2	1.31228e-16	0.192687	0.151	0.236	2.08863e-12		Otud6b	8.3631e-07	0.149656	0.129	0.11	0.0133107		Cd5	0	0.192281	0.645	0.217	0
Actn2	2.49817e-17	0.192655	0.061	0.035	3.97608e-13		Syvn1	5.12035e-16	0.149654	0.139	0.1	8.14955e-12		Dnajc19	2.16493e-262	0.192273	0.758	0.318	3.44571e-258
Spin1	1.64653e-20	0.192597	0.16	0.258	2.62061e-16		Pgrmc2	0.00102245	0.14884	0.181	0.176	1		Dgkz	0	0.191908	0.693	0.245	0
Cd47	1.21703e-22	0.192594	0.825	0.813	1.93702e-18		Cnot7	0.0203292	0.148611	0.221	0.23	1		Ppp1r2	0	0.191789	0.608	0.2	0
Mosmo	2.09513e-15	0.192545	0.151	0.233	3.33461e-11		Cars	2.40858e-05	0.148521	0.117	0.102	0.383349		Dpysl2	0	0.191742	0.439	0.091	0
Spty2d1	2.73995e-25	0.192431	0.161	0.269	4.36091e-21		Cpsf6	0.000771275	0.148477	0.39	0.425	1		Clpb	0	0.191738	0.376	0.064	0
Fbxo27	4.40908e-12	0.192107	0.071	0.048	7.01749e-08		Dph2	2.58332e-27	0.148125	0.114	0.066	4.11161e-23		Mrps18a	0	0.191696	0.672	0.231	0
Nbr1	2.08234e-05	0.191963	0.101	0.136	0.331425		Nup62	0.82317	0.148116	0.223	0.258	1		Cdkn2aipnl	0	0.19154	0.52	0.134	0
Pgs1	3.91794e-29	0.191844	0.224	0.381	6.23579e-25		Olfr1369-ps1	1.67597e-22	0.148006	0.035	0.012	2.66748e-18		Kbtbd11	0	0.190851	0.641	0.203	0
Abhd2	2.762e-08	0.191594	0.121	0.172	0.000439599		AI987944	0.0339965	0.147878	0.147	0.144	1		Mpc1	3.61898e-202	0.190724	0.825	0.389	5.75997e-198
Sh3pxd2a	6.43503e-28	0.191509	0.06	0.027	1.0242e-23		Cox11	1.34575e-05	0.14787	0.154	0.14	0.21419		Rab11a	0	0.190316	0.628	0.203	0
Ccnt2	2.94059e-28	0.191234	0.211	0.357	4.68024e-24		Mid1	5.65861e-29	0.147753	0.082	0.04	9.00625e-25		Ndufs7	3.01088e-201	0.190287	0.852	0.411	4.79211e-197
Rin3	1.62287e-39	0.191206	0.173	0.319	2.58295e-35		Pde4b	0.859546	0.14772	0.2	0.221	1		Ide	0	0.189837	0.555	0.154	0
Fbxl14	1.81568e-27	0.191174	0.177	0.3	2.88984e-23		Prdx3	6.00562e-05	0.147661	0.411	0.445	0.955854		Rmi2	0	0.189754	0.267	0.025	0
Thoc2	7.4827e-17	0.191151	0.358	0.576	1.19095e-12		Orc4	0.00144101	0.147382	0.242	0.245	1		Hsp90b1	6.80561e-81	0.189716	0.959	0.779	1.08318e-76
Haus3	2.92522e-35	0.190992	0.17	0.305	4.65578e-31		Rnf44	1.62073e-09	0.146947	0.185	0.156	2.57955e-05		Timm10b	0	0.189471	0.671	0.23	0
Smim15	5.86825e-38	0.190986	0.236	0.423	9.33991e-34		Slc2a1	3.83635e-05	0.146876	0.146	0.132	0.610594		Mettl9	0	0.189236	0.533	0.145	0
Rpl27-ps3	3.73127e-26	0.190539	0.213	0.356	5.93869e-22		Cnot4	1.06213e-07	0.146588	0.352	0.347	0.00169049		Isg20	2.38442e-297	0.189185	0.304	0.071	3.79505e-293
Snhg12	2.48756e-07	0.190421	0.226	0.313	0.00395919		1110008F13Rik	1.45819e-07	0.146585	0.651	0.668	0.00232085		Mrps33	1.37982e-179	0.189108	0.866	0.436	2.19613e-175
Fus	0.00522343	0.190404	0.624	0.844	1		Banf1	6.50493e-09	0.146291	0.629	0.606	0.000103532		Dstn	0	0.189046	0.276	0.038	0
Cr1l	2.88887e-30	0.190389	0.297	0.511	4.59792e-26		Bcl3	0.100008	0.146244	0.144	0.145	1		Ttk	0	0.188619	0.203	0	0
Ddhd2	9.15052e-12	0.190386	0.117	0.175	1.4564e-07		Telo2	1.41006e-05	0.146191	0.168	0.153	0.224425		Zfp524	0	0.188475	0.37	0.065	0
Birc6	6.03291e-14	0.190334	0.387	0.62	9.60198e-10		Mrpl21	2.23741e-06	0.146071	0.524	0.556	0.0356106		Smarca5	4.85218e-120	0.18835	0.858	0.524	7.72272e-116
Zmat1	2.36674e-36	0.190281	0.056	0.02	3.7669e-32		Phf6	0.465794	0.145683	0.243	0.27	1		Ccdc69	0	0.18832	0.352	0.048	0
Secisbp2l	2.3469e-23	0.190068	0.131	0.22	3.73533e-19		Akt2	0.233957	0.145578	0.235	0.256	1		Emc8	0	0.18803	0.588	0.2	0
March2	3.79535e-31	0.189988	0.252	0.437	6.04068e-27		Slc25a22	3.37384e-34	0.145348	0.105	0.053	5.3698e-30		Bcl2l12	0	0.187865	0.335	0.045	0
Ufl1	3.02947e-31	0.189852	0.147	0.258	4.8217e-27		Hmgxb3	4.76938e-21	0.145263	0.11	0.068	7.59094e-17		Hip1r	0	0.187689	0.336	0.046	0
Orai3	1.70937e-07	0.189571	0.119	0.167	0.00272063		Slc39a14	1.2634e-51	0.145188	0.095	0.037	2.01083e-47		Mrpl22	0	0.187489	0.564	0.16	0
Rmdn2	0.538519	0.189556	0.079	0.082	1		Skiv2l2	0.014988	0.145066	0.271	0.29	1		Fam173a	3.74347e-293	0.187266	0.806	0.327	5.9581e-289
Cebpzos	5.46316e-43	0.189433	0.177	0.33	8.69517e-39		Alg5	0.0110846	0.144911	0.406	0.455	1		Cox7b	3.52714e-102	0.187196	0.969	0.705	5.61379e-98
Unkl	6.62244e-06	0.189416	0.089	0.121	0.105403		Lman1	0.129154	0.144795	0.273	0.301	1		Sar1b	4.27592e-259	0.18693	0.753	0.313	6.80555e-255
Arhgef18	2.22353e-20	0.189095	0.129	0.212	3.53897e-16		Kdm6bos	5.28733e-134	0.144659	0.062	0.004	8.41531e-130		Cript	4.02153e-254	0.186785	0.789	0.339	6.40066e-250
Dcaf7	1.81028e-22	0.18902	0.148	0.244	2.88124e-18		Surf6	4.54484e-05	0.144558	0.152	0.139	0.723356		Hk1	0	0.186241	0.537	0.142	0
Unc119	1.12135e-19	0.188961	0.296	0.476	1.78474e-15		Gm26853	1.7483e-25	0.144312	0.128	0.078	2.7826e-21		Ap1g2	0	0.186117	0.402	0.074	0
Ndufb3	0.242116	0.188831	0.467	0.673	1		Hat1	1.24375e-05	0.144307	0.36	0.362	0.197955		Tmem37	0	0.185965	0.188	0.016	0
Ing2	8.73371e-31	0.188814	0.136	0.242	1.39006e-26		Hsf2	4.77813e-21	0.144131	0.083	0.047	7.60487e-17		Hsd17b10	0	0.185955	0.715	0.265	0
Baz2b	7.74464e-06	0.188647	0.085	0.117	0.123264		Ydjc	1.92094e-05	0.144116	0.116	0.1	0.305737		Wdr83	0	0.185818	0.411	0.078	0
Gbf1	1.81156e-30	0.188581	0.148	0.261	2.88327e-26		Supv3l1	9.88497e-21	0.143295	0.103	0.063	1.57329e-16		Plekha2	0	0.185613	0.489	0.107	0
Fbxl5	1.42016e-05	0.188492	0.127	0.171	0.226032		Trat1	0.518722	0.142962	0.154	0.165	1		Snrpb2	1.92354e-304	0.185613	0.681	0.257	3.0615e-300
Tm9sf2	4.56085e-37	0.188121	0.232	0.412	7.25904e-33		Ptdss1	2.94107e-06	0.142823	0.155	0.137	0.0468101		Rbm43	0	0.185506	0.396	0.069	0
Map4k2	3.19029e-34	0.18811	0.17	0.303	5.07766e-30		Ncln	0.0113764	0.14249	0.146	0.142	1		Rad54l	0	0.185276	0.205	0.001	0
Arhgap26	8.22861e-22	0.188036	0.121	0.203	1.30967e-17		Skp1a	0.00320502	0.142431	0.331	0.359	1		Odf2	0	0.185204	0.383	0.082	0
Vcpip1	3.14188e-27	0.187902	0.168	0.285	5.00062e-23		Hars	0.18651	0.141871	0.326	0.376	1		Usp5	0	0.184967	0.385	0.068	0
Slc25a11	7.18756e-16	0.18788	0.335	0.538	1.14397e-11		Piezo1	3.49193e-07	0.141854	0.107	0.087	0.00555776		Ercc6l	0	0.184829	0.225	0.009	0
Ppp4r3a	3.92928e-27	0.187846	0.285	0.481	6.25385e-23		Ccdc127	0.000752291	0.141706	0.215	0.212	1		Gcat	0	0.184734	0.248	0.02	0
D030056L22Rik	0.0262287	0.187784	0.312	0.402	1		Plaur	1.36549e-118	0.141678	0.047	0.001	2.17332e-114		Eif2b1	0	0.184639	0.428	0.097	0
Xpa	1.16226e-40	0.187769	0.205	0.371	1.84985e-36		Pus7l	9.91705e-14	0.141654	0.105	0.074	1.5784e-09		Eipr1	0	0.184214	0.386	0.071	0
Actr2	0.0185817	0.187644	0.593	0.793	1		Cox5a	2.7744e-15	0.141456	0.931	0.878	4.41574e-11		Fuca1	0	0.184048	0.609	0.169	0
Sirt7	2.45392e-14	0.187632	0.357	0.57	3.90567e-10		Uspl1	1.89579e-07	0.141309	0.16	0.137	0.00301734		Fcf1	5.828e-288	0.183947	0.706	0.275	9.27584e-284
Retreg2	2.41374e-25	0.187563	0.144	0.245	3.84171e-21		Ppp5c	0.0616331	0.140925	0.277	0.302	1		Tssc4	0	0.183781	0.439	0.1	0
Morf4l1	7.03679e-05	0.187469	0.652	0.835	1		Ncoa7	3.67871e-64	0.140911	0.07	0.191	5.85503e-60		Helb	0	0.183448	0.353	0.053	0
Pnpla8	2.78695e-12	0.187407	0.109	0.165	4.43571e-08		Calu	0.207119	0.140763	0.204	0.22	1		Larp7	0	0.183344	0.576	0.196	0
Akr1c13	0.0598643	0.187402	0.094	0.112	1		Paxbp1	0.288417	0.140742	0.273	0.304	1		Scnm1	0	0.183283	0.378	0.064	0
Cox14	1.59598e-17	0.187392	0.345	0.565	2.54017e-13		Errfi1	2.04941e-24	0.140684	0.083	0.044	3.26184e-20		Gale	0	0.183151	0.283	0.028	0
Cers4	8.3623e-42	0.187349	0.182	0.334	1.33094e-37		Prpf4b	4.55072e-10	0.140473	0.61	0.637	7.24293e-06		Idh3a	3.85885e-257	0.182924	0.691	0.285	6.14175e-253
Tcf3	6.62014e-35	0.187147	0.219	0.387	1.05366e-30		Elk1	4.84445e-31	0.140434	0.087	0.042	7.71042e-27		Derl2	0	0.182858	0.652	0.229	0
Chmp2b	4.83337e-13	0.187125	0.131	0.198	7.69279e-09		Pop5	2.97282e-08	0.140053	0.641	0.669	0.000473154		Znhit1	0	0.182632	0.395	0.078	0
Numb	0.969964	0.186766	0.082	0.089	1		Lrrfip1	0.08353	0.139565	0.653	0.731	1		Mif4gd	0	0.182583	0.587	0.173	0
Prorsd1	4.36519e-37	0.18669	0.177	0.319	6.94764e-33		Rbm19	8.492e-17	0.139523	0.11	0.073	1.35159e-12		Cd2	2.43113e-158	0.182471	0.878	0.474	3.86939e-154
Sephs2	4.20065e-31	0.186566	0.287	0.494	6.68575e-27		Tusc2	3.61966e-06	0.13934	0.226	0.212	0.0576104		Psmc3ip	0	0.18206	0.255	0.02	0
Cab39	8.63803e-09	0.186524	0.42	0.66	0.000137483		Emc4	0.138242	0.139326	0.301	0.34	1		Cyc1	2.84005e-172	0.182036	0.801	0.4	4.52022e-168
Fbxl3	1.32444e-19	0.186431	0.139	0.226	2.10798e-15		Papd4	0.0857955	0.1392	0.242	0.261	1		Rap1a	1.41909e-92	0.181975	0.96	0.667	2.25862e-88
Ddhd1	1.14646e-08	0.18633	0.107	0.153	0.000182471		Dusp12	5.24254e-09	0.1391	0.157	0.131	8.34403e-05		Sf3a3	1.11074e-268	0.181894	0.711	0.289	1.76786e-264
Crkl	1.83332e-14	0.186296	0.108	0.168	2.91791e-10		Car12	4.02485e-92	0.138574	0.061	0.009	6.40595e-88		Cir1	0	0.181868	0.591	0.162	0
Ctps2	6.04192e-25	0.186288	0.157	0.264	9.61633e-21		Rlim	0.000205847	0.138394	0.252	0.25	1		Map4	0	0.181783	0.401	0.079	0
Zmym4	1.43485e-11	0.186282	0.113	0.169	2.28371e-07		Cdk8	2.98622e-09	0.138348	0.233	0.207	4.75286e-05		Gm14005	0	0.181781	0.255	0.03	0
Tusc3	1.35328e-37	0.186146	0.178	0.321	2.15388e-33		Trp53rkb	1.49359e-07	0.13833	0.125	0.104	0.0023772		Capza2	2.81675e-109	0.181728	0.934	0.598	4.48314e-105
Zfp646	7.86324e-32	0.185987	0.169	0.295	1.25151e-27		Rdh13	2.89219e-60	0.138241	0.073	0.021	4.60322e-56		Mrpl45	0	0.181374	0.438	0.105	0
Slc25a28	1.72217e-16	0.185934	0.113	0.18	2.74101e-12		Arg1	6.33495e-05	0.137689	0.018	0.011	1		Fhl2	0	0.181294	0.2	0.011	0
Mon2	6.39291e-14	0.185845	0.122	0.187	1.0175e-09		Nek8	3.12326e-16	0.137634	0.078	0.048	4.97098e-12		Gm14718	1.54455e-249	0.181164	0.267	0.066	2.4583e-245
Lysmd3	2.392e-07	0.185744	0.116	0.161	0.0038071		Nagpa	7.00806e-06	0.137617	0.146	0.129	0.11154		Rom1	0	0.181122	0.212	0.016	0
Pcm1	3.35217e-33	0.185698	0.199	0.346	5.33532e-29		Zzz3	3.0491e-05	0.136873	0.22	0.208	0.485294		Sap18	4.61386e-187	0.181018	0.804	0.387	7.34342e-183
Wdr82	4.057e-24	0.185548	0.166	0.275	6.45712e-20		Themis	0.00438246	0.136832	0.3	0.368	1		Glrx2	0	0.180907	0.664	0.226	0
Ublcp1	1.97655e-10	0.185475	0.095	0.142	3.14588e-06		Etv6	0.000560071	0.136807	0.15	0.139	1		Anapc2	0	0.180839	0.385	0.066	0
Actr8	2.9408e-11	0.185402	0.104	0.156	4.68058e-07		Dhx9	0.000692679	0.13673	0.496	0.526	1		Ctsc	0	0.180619	0.6	0.196	0
Bphl	0.311752	0.185351	0.086	0.099	1		Rpl23a	1.45654e-49	0.136483	0.989	0.99	2.31823e-45		Higd1a	1.17229e-155	0.180597	0.82	0.434	1.86581e-151
Drap1	0.138374	0.185245	0.483	0.708	1		Txndc5	0.825941	0.136474	0.264	0.308	1		Tnfrsf13b	0	0.180482	0.311	0.053	0
Cd6	1.12925e-19	0.185139	0.279	0.446	1.79732e-15		Cnih1	0.0222725	0.135975	0.322	0.355	1		Btf3	3.25318e-119	0.180475	1	0.963	5.17775e-115
Bcl10	4.16103e-25	0.185059	0.306	0.514	6.6227e-21		Mrps30	0.21211	0.135839	0.317	0.364	1		Samm50	1.20214e-278	0.180357	0.735	0.294	1.91333e-274
Irak2	0.21689	0.185022	0.077	0.077	1		Pam16	0.00369947	0.13527	0.384	0.427	1		Aldh2	0	0.180341	0.197	0.013	0
Angel2	2.43074e-38	0.184956	0.179	0.324	3.86876e-34		Pgm3	0.00117996	0.135265	0.138	0.129	1		Mad2l1bp	0	0.180065	0.381	0.063	0
Prdm2	3.07238e-16	0.184705	0.141	0.22	4.89e-12		Ddx54	0.000382078	0.135133	0.417	0.452	1		Crmp1	0	0.179965	0.209	0.012	0
Dstyk	1.9032e-14	0.1845	0.065	0.04	3.02913e-10		Jmjd6	0.0410813	0.135109	0.302	0.328	1		Gatd1	0	0.179736	0.419	0.084	0
Ip6k1	2.05647e-27	0.184482	0.133	0.232	3.27307e-23		Ddx39	1.47395e-10	0.135107	0.634	0.586	2.34593e-06		Itpr1	0	0.1797	0.434	0.1	0
Nop53	0.304492	0.184451	0.567	0.8	1		Gm2000	0.00624789	0.135063	0.251	0.261	1		Ubl7	0	0.179645	0.402	0.084	0
Traf3	2.72111e-14	0.184238	0.131	0.201	4.33093e-10		Tle3	0.0014961	0.135063	0.221	0.218	1		Rhno1	0	0.179548	0.44	0.104	0
Phf20	3.10939e-17	0.184222	0.118	0.188	4.94891e-13		Zdhhc5	0.0012169	0.134973	0.17	0.162	1		Nmt1	0	0.179487	0.588	0.188	0
Tbck	7.7582e-05	0.184215	0.09	0.12	1		Fyttd1	0.000197864	0.133854	0.235	0.229	1		Psenen	1.9385e-167	0.179479	0.916	0.49	3.08532e-163
Zhx1	2.71358e-15	0.184137	0.132	0.205	4.31894e-11		Tacc2	2.34244e-12	0.133748	0.102	0.072	3.72822e-08		Mrpl21	6.86229e-212	0.179354	0.81	0.374	1.0922e-207
Gak	1.50339e-28	0.184089	0.146	0.253	2.3928e-24		Eif2b5	0.296848	0.133655	0.241	0.288	1		Tsr3	0	0.179209	0.52	0.141	0
Grina	2.39171e-23	0.184077	0.134	0.226	3.80664e-19		Fam241a	0.00168256	0.133434	0.104	0.094	1		Tomm6	0	0.178995	0.325	0.05	0
Glipr1	2.81734e-30	0.184026	0.254	0.434	4.48408e-26		Slc39a7	0.086341	0.133236	0.274	0.298	1		Txndc9	4.85539e-277	0.17886	0.754	0.304	7.72784e-273
P2rx4	0.000173215	0.184016	0.101	0.133	1		Tarbp1	1.35632e-40	0.13296	0.075	0.029	2.15871e-36		Uap1l1	0	0.178745	0.304	0.041	0
Gbe1	0.0536777	0.183849	0.093	0.112	1		Ralgapa1	0.000589045	0.132697	0.177	0.167	1		Foxm1	0	0.178413	0.197	0.003	0
Nsmaf	1.93777e-41	0.183586	0.181	0.333	3.08416e-37		Nasp	1.72581e-18	0.132511	0.548	0.47	2.7468e-14		Bola3	2.6077e-291	0.178389	0.691	0.268	4.15042e-287
Mpc2	1.90044e-09	0.183544	0.378	0.596	3.02474e-05		Aven	0.636158	0.132264	0.254	0.3	1		Cox19	0	0.178326	0.511	0.14	0
Sav1	1.42029e-11	0.18343	0.118	0.177	2.26053e-07		Mgat1	6.43835e-06	0.132203	0.204	0.272	0.102473		Syce2	0	0.178271	0.3	0.053	0
Zmiz2	7.9386e-28	0.18343	0.178	0.301	1.26351e-23		Wdr89	3.45424e-07	0.131991	0.402	0.414	0.00549778		March2	0	0.177888	0.64	0.195	0
Srp14	1.77936e-10	0.183181	0.67	0.88	2.83203e-06		Dhx37	2.10727e-15	0.13198	0.086	0.055	3.35394e-11		Cenpn	0	0.177767	0.219	0.006	0
Dusp7	1.68753e-14	0.182957	0.115	0.178	2.68587e-10		Mrpl16	0.343815	0.131857	0.353	0.412	1		Nras	0	0.177693	0.553	0.16	0
Pde6d	2.05664e-21	0.182738	0.114	0.192	3.27334e-17		Bri3	0.00118371	0.131608	0.476	0.531	1		Fdft1	0	0.177361	0.278	0.032	0
Sh3kbp1	0.000417077	0.182694	0.439	0.643	1		Dvl1	2.37108e-30	0.13118	0.085	0.041	3.77381e-26		Phb2	9.02975e-108	0.177312	0.927	0.57	1.43717e-103
Tvp23b	7.4584e-16	0.182617	0.151	0.234	1.18708e-11		Cdk11b	1.88498e-05	0.130754	0.431	0.456	0.300013		Actr1a	0	0.177302	0.387	0.069	0
Cstf2t	0.000215795	0.182567	0.089	0.117	1		Mrps25	0.0300786	0.130663	0.342	0.381	1		Trafd1	0	0.176727	0.445	0.097	0
Flt3l	2.91879e-36	0.182506	0.151	0.276	4.64554e-32		Ssr3	0.324207	0.130592	0.393	0.454	1		C030034L19Rik	0	0.176691	0.23	0.032	0
Upf3b	8.44315e-39	0.18243	0.204	0.366	1.34381e-34		Rmdn3	0.000439996	0.130442	0.113	0.101	1		Suv39h1	0	0.176536	0.28	0.031	0
Senp2	1.78335e-27	0.182343	0.205	0.342	2.83838e-23		Abl2	1.30623e-28	0.1303	0.094	0.048	2.07899e-24		Cdca7	3.4601e-256	0.176467	0.324	0.093	5.5071e-252
Eapp	7.31159e-33	0.182175	0.276	0.482	1.16371e-28		Cyp51	0.660475	0.130049	0.202	0.221	1		Mea1	0	0.176459	0.588	0.18	0
Rptor	0.000372038	0.182077	0.108	0.14	1		9430038I01Rik	4.2704e-06	0.129966	0.132	0.114	0.0679677		Ybx3	0	0.176278	0.737	0.271	0
Mkl1	2.00581e-14	0.18196	0.104	0.163	3.19244e-10		Mapk1ip1l	0.0236286	0.129965	0.324	0.352	1		Ttc1	0	0.175961	0.571	0.165	0
Hltf	4.38884e-43	0.181847	0.176	0.327	6.98528e-39		Iigp1	1.89583e-29	0.129904	0.103	0.189	3.0174e-25		Appl1	0	0.175876	0.629	0.2	0
Chchd7	1.01211e-35	0.181787	0.157	0.283	1.61087e-31		Tnpo1	0.00895235	0.129735	0.245	0.252	1		Trappc5	0	0.175851	0.596	0.191	0
Kdm7a	2.79175e-15	0.181747	0.165	0.252	4.44335e-11		Zfp91	0.000183526	0.129552	0.502	0.539	1		Arhgap10	0	0.175823	0.352	0.06	0
Parp11	1.07004e-05	0.181633	0.103	0.139	0.170308		Ube2k	0.000315905	0.129399	0.482	0.526	1		Ddx1	0	0.175783	0.547	0.183	0
Taok2	1.1061e-16	0.18155	0.112	0.18	1.76046e-12		Tfb2m	0.00196144	0.12939	0.169	0.163	1		Phkg2	0	0.175709	0.411	0.084	0
Midn	4.08898e-23	0.181335	0.151	0.249	6.50802e-19		Rab20	2.13101e-78	0.129141	0.069	0.014	3.39171e-74		Gbp2	0	0.175649	0.524	0.137	0
Ctnnb1	4.56801e-23	0.181127	0.31	0.513	7.27045e-19		Tmtc4	1.9988e-21	0.128677	0.083	0.046	3.18129e-17		Gtf2i	6.56244e-288	0.175528	0.687	0.269	1.04448e-283
Dync1i2	5.52514e-33	0.181019	0.257	0.446	8.79381e-29		Cdc37	4.00076e-06	0.128546	0.729	0.732	0.0636761		Cep57	0	0.175442	0.521	0.143	0
Kif21b	3.87213e-33	0.180978	0.221	0.385	6.16289e-29		Rce1	0.328981	0.128391	0.222	0.243	1		Erlec1	0	0.174848	0.559	0.141	0
Marveld1	9.30032e-11	0.180969	0.062	0.042	1.48024e-06		Cystm1	1.56734e-118	0.128135	0.053	0.003	2.49458e-114		Rnf216	0	0.174833	0.207	0.009	0
Ttyh3	0.563874	0.18096	0.072	0.074	1		B3galnt2	7.81087e-15	0.127845	0.125	0.088	1.24318e-10		Acap2	0	0.174769	0.466	0.102	0
Ganab	4.6137e-29	0.180845	0.153	0.265	7.34317e-25		Gm9856	1.91995e-08	0.127844	0.181	0.153	0.000305579		Sptan1	0	0.174737	0.518	0.145	0
Rab6a	2.39462e-22	0.180758	0.156	0.256	3.81128e-18		Stoml2	0.173464	0.127806	0.372	0.425	1		Asl	0	0.174693	0.399	0.085	0
Pbx2	3.99917e-13	0.180725	0.109	0.168	6.36508e-09		Kpna6	0.000147972	0.127779	0.157	0.144	1		Cdk2ap1	6.561e-306	0.174618	0.579	0.205	1.04425e-301
Ebag9	1.91511e-22	0.180707	0.134	0.224	3.04808e-18		Kri1	0.571935	0.127643	0.176	0.189	1		Ubr7	0	0.174537	0.359	0.058	0
Ercc6l2	2.40242e-08	0.180695	0.091	0.131	0.000382369		Ube3c	0.000148153	0.127455	0.198	0.187	1		Idi1	0	0.174296	0.363	0.087	0
Man1a	2.5311e-19	0.180599	0.232	0.365	4.0285e-15		Bola2	0.000994383	0.127246	0.488	0.529	1		Mapk3	0	0.173718	0.394	0.068	0
Zfp592	5.74143e-13	0.180596	0.107	0.164	9.13805e-09		Arhgap5	5.68072e-39	0.1272	0.109	0.051	9.04143e-35		Psmd1	4.37265e-282	0.173201	0.602	0.225	6.95951e-278
Ccdc171	6.70694e-08	0.180483	0.068	0.05	0.00106748		Hnrnph1	4.93276e-09	0.127162	0.516	0.528	7.85098e-05		Lgals3bp	0	0.173188	0.553	0.168	0
Edaradd	4.26655e-41	0.180424	0.053	0.017	6.79064e-37		Fnip1	1.9009e-06	0.1271	0.106	0.086	0.0302548		Rpl37	8.19706e-104	0.1731	1	0.988	1.30464e-99
Ralgapa2	7.10746e-06	0.180404	0.099	0.134	0.113122		Sumo1	4.2142e-12	0.126926	0.812	0.817	6.70733e-08		Sidt1	0	0.172886	0.37	0.07	0
Ncoa1	0.089644	0.180381	0.077	0.091	1		Zfp566	1.33005e-40	0.126631	0.08	0.032	2.1169e-36		Fanca	0	0.172817	0.194	0.002	0
Ankrd40	1.59721e-30	0.180153	0.138	0.245	2.54212e-26		Lsm1	0.000770271	0.126448	0.46	0.511	1		Cndp2	0	0.172813	0.499	0.142	0
Smim12	2.04004e-33	0.180024	0.187	0.33	3.24693e-29		Ube2n	8.13783e-07	0.126376	0.647	0.636	0.0129522		Coq7	0	0.172455	0.333	0.056	0
Ccnl2	7.80115e-27	0.179973	0.322	0.548	1.24163e-22		Tmem68	7.32163e-13	0.126349	0.132	0.098	1.16531e-08		Prr11	0	0.172139	0.176	0.001	0
Gxylt1	1.96304e-24	0.179895	0.108	0.187	3.12437e-20		Rnf2	8.96794e-05	0.126327	0.209	0.198	1		Decr1	0	0.172118	0.279	0.038	0
Foxj2	2.4441e-05	0.179514	0.068	0.055	0.389004		Foxk2	0.000207749	0.126253	0.133	0.121	1		Timm13	1.03802e-94	0.171955	0.933	0.598	1.65211e-90
Lbh	0.00384818	0.179391	0.419	0.589	1		Coa7	0.912904	0.126062	0.148	0.164	1		Dnajb11	1.80785e-140	0.171903	0.821	0.444	2.87737e-136
Sulf2	1.92423e-09	0.179255	0.057	0.038	3.06261e-05		Ing5	0.193089	0.125957	0.17	0.178	1		Ankrd13a	0	0.171449	0.593	0.173	0
Commd6	1.2675e-35	0.179145	0.255	0.45	2.01735e-31		Crtap	1.0937e-25	0.125726	0.082	0.042	1.74074e-21		Cep97	0	0.171387	0.344	0.058	0
Stx17	0.000168529	0.179145	0.084	0.111	1		Hspa1a	3.10137e-55	0.125638	0.035	0.004	4.93614e-51		Upf3a	0	0.171287	0.515	0.149	0
Aaed1	5.65137e-11	0.179024	0.09	0.136	8.99472e-07		Chsy1	0.00289582	0.125608	0.277	0.282	1		Mtpn	3.77062e-245	0.171266	0.707	0.299	6.00132e-241
Synj1	1.07176e-14	0.178996	0.109	0.171	1.70581e-10		Dhps	0.0306849	0.12548	0.382	0.428	1		Psma3	1.5415e-87	0.171237	0.978	0.746	2.45345e-83
Rpl10	2.73546e-79	0.178953	0.996	0.997	4.35376e-75		Smarca4	0.188101	0.125145	0.36	0.408	1		Psmc6	1.47269e-162	0.171117	0.835	0.423	2.34393e-158
Max	8.28263e-25	0.178916	0.293	0.49	1.31826e-20		Pspc1	0.76677	0.124927	0.254	0.294	1		Baiap3	0	0.170835	0.198	0.009	0
Paxx	1.10368e-43	0.178894	0.174	0.325	1.75662e-39		Mtf1	0.256831	0.124772	0.166	0.175	1		Otub1	0	0.170645	0.528	0.154	0
Brwd1	6.39957e-06	0.178707	0.128	0.172	0.101856		Gm26870	1.07365e-26	0.124699	0.041	0.014	1.70881e-22		Skap1	8.12468e-116	0.170641	0.992	0.707	1.29312e-111
Mplkip	2.34586e-26	0.178628	0.326	0.556	3.73367e-22		Igtp	7.13761e-22	0.124542	0.404	0.569	1.13602e-17		Cby1	0	0.170558	0.257	0.022	0
Dhx30	1.87009e-19	0.17853	0.16	0.254	2.97644e-15		Cers6	1.06768e-31	0.124443	0.068	0.029	1.69933e-27		H2afj	3.14355e-105	0.170336	0.962	0.663	5.00327e-101
Bach2	0.000324905	0.178496	0.099	0.128	1		Ubiad1	1.96222e-37	0.12432	0.074	0.03	3.12308e-33		Tesc	1.98727e-171	0.170177	0.772	0.387	3.16294e-167
Cited4	0.000271744	0.178363	0.075	0.064	1		Gm20186	1.04831e-06	0.124251	0.065	0.047	0.0166849		Brd9	0	0.169995	0.505	0.119	0
Ubxn1	0.00988899	0.178297	0.564	0.765	1		Rai1	2.2871e-07	0.123985	0.144	0.119	0.00364014		Dctn5	0	0.169913	0.36	0.065	0
Gon4l	1.48701e-35	0.17821	0.259	0.457	2.36672e-31		Prps1l3	3.8551e-12	0.123771	0.121	0.089	6.13578e-08		Msl3	0	0.169901	0.371	0.068	0
Tshz1	4.05064e-19	0.178123	0.116	0.189	6.44699e-15		Gapvd1	0.0107418	0.123683	0.286	0.3	1		Asna1	0	0.169896	0.441	0.104	0
Slfn5	0.61859	0.178082	0.127	0.142	1		Cd164	9.65553e-05	0.123473	0.427	0.453	1		Rmnd5b	0	0.169615	0.417	0.078	0
Ubr3	7.35914e-07	0.177748	0.093	0.129	0.0117128		Rwdd1	0.00337739	0.123446	0.613	0.653	1		Tspan31	0	0.169607	0.316	0.05	0
Tmem191c	6.0273e-10	0.17769	0.095	0.14	9.59305e-06		Sh3rf1	6.57361e-18	0.123403	0.074	0.042	1.04626e-13		Asxl1	0	0.169536	0.471	0.134	0
Vps41	9.60009e-28	0.177397	0.138	0.239	1.52795e-23		Znrf3	1.58808e-41	0.123376	0.097	0.042	2.52759e-37		Arhgef6	0	0.169298	0.715	0.231	0
Fbxl17	6.15931e-05	0.177316	0.106	0.141	0.980315		Cdk5r1	6.52247e-44	0.123316	0.062	0.02	1.03812e-39		Pigyl	0	0.168942	0.471	0.1	0
Gmcl1	6.61535e-15	0.177216	0.102	0.161	1.0529e-10		Pptc7	0.0143936	0.123048	0.232	0.235	1		Nrbp1	0	0.168919	0.568	0.16	0
Gm5547	1.34952e-12	0.177197	0.102	0.156	2.1479e-08		Bcl10	3.23373e-05	0.123047	0.424	0.446	0.51468		Rpp25l	0	0.16886	0.631	0.206	0
Eya2	0.10949	0.177018	0.067	0.065	1		Top1mt	1.37081e-18	0.122773	0.078	0.045	2.18178e-14		Galk2	0	0.168698	0.405	0.081	0
Tbc1d5	0.967251	0.176975	0.08	0.086	1		Lrmp	0.00277521	0.122734	0.453	0.561	1		Bin3	0	0.168687	0.507	0.134	0
Apc	2.10019e-33	0.176942	0.18	0.314	3.34267e-29		Trmt10a	8.56286e-10	0.12262	0.108	0.082	1.36286e-05		Tubgcp2	0	0.168607	0.338	0.055	0
Elk3	5.58277e-16	0.176769	0.11	0.175	8.88554e-12		Bms1	0.981916	0.122556	0.277	0.319	1		Elf4	0	0.168365	0.522	0.136	0
March6	4.76866e-17	0.176727	0.126	0.199	7.58981e-13		Akap8	0.408641	0.122199	0.294	0.331	1		Chchd5	0	0.168329	0.317	0.05	0
4933406I18Rik	6.56462e-09	0.176724	0.067	0.048	0.000104483		Mrpl43	2.04641e-05	0.122137	0.555	0.598	0.325706		Rps12	2.15891e-140	0.168277	1	0.998	3.43611e-136
Ccni	1.62616e-41	0.176577	0.245	0.445	2.58819e-37		Hacd3	6.17468e-06	0.121848	0.165	0.146	0.0982763		Tex261	0	0.168251	0.709	0.26	0
Klhl28	8.10216e-06	0.176506	0.095	0.13	0.128954		Ercc2	7.14259e-18	0.121708	0.091	0.056	1.13681e-13		Prim2	0	0.168206	0.253	0.02	0
Soat2	0.537285	0.176126	0.066	0.073	1		Fnbp4	0.899451	0.121606	0.303	0.348	1		Dscr3	0	0.168126	0.37	0.065	0
Dlgap4	2.54444e-26	0.176095	0.146	0.249	4.04972e-22		Gm15283	1.81581e-14	0.1211	0.076	0.048	2.89004e-10		Haus7	0	0.167862	0.342	0.052	0
Tapt1	0.000226601	0.176009	0.102	0.133	1		Hmgcr	0.463628	0.120775	0.25	0.277	1		Anln	0	0.16786	0.178	0.001	0
Slc26a2	0.000113615	0.176005	0.091	0.12	1		Bclaf1	4.80707e-09	0.120679	0.618	0.649	7.65093e-05		Taf1b	0	0.1678	0.402	0.081	0
Ylpm1	4.31069e-31	0.175902	0.162	0.282	6.86089e-27		2310057M21Rik	0.000281552	0.12027	0.113	0.101	1		Syf2	9.2974e-176	0.167648	0.903	0.463	1.47977e-171
Rnf181	4.90329e-27	0.175888	0.127	0.222	7.80408e-23		Aff1	0.023466	0.12027	0.134	0.127	1		Paxx	0	0.167584	0.504	0.119	0
Ifi213	2.89466e-16	0.175765	0.137	0.212	4.60714e-12		Eif4h	6.97223e-06	0.120235	0.626	0.637	0.11097		Gm44756	0	0.16758	0.146	0	0
Gsap	4.11204e-39	0.17562	0.147	0.272	6.54472e-35		Frmd6	5.38556e-29	0.11969	0.085	0.042	8.57165e-25		Pml	0	0.167497	0.351	0.06	0
Sec62	2.41026e-05	0.175495	0.49	0.761	0.383618		Pigf	0.612812	0.119649	0.182	0.2	1		Inpp5k	0	0.167334	0.415	0.085	0
Hs2st1	0.00157215	0.175452	0.104	0.132	1		Exosc2	0.365791	0.119609	0.177	0.187	1		Pdcd10	5.13002e-119	0.167184	0.894	0.514	8.16494e-115
Tbc1d10c	0.640216	0.175313	0.459	0.6	1		Fancf	2.89163e-05	0.119296	0.093	0.078	0.460232		Kifc1	0	0.167176	0.2	0.005	0
Mkrn1	1.03617e-16	0.175253	0.371	0.604	1.64916e-12		Pdap1	0.00268846	0.119072	0.532	0.553	1		Mid1ip1	0	0.167169	0.234	0.019	0
Xlr4b	5.11204e-34	0.175171	0.193	0.338	8.13632e-30		Coq2	0.268508	0.118727	0.193	0.206	1		Exosc3	6.40672e-173	0.167073	0.797	0.387	1.01969e-168
Gm16124	1.18747e-27	0.175062	0.061	0.028	1.88998e-23		Phactr2	0.593228	0.118715	0.118	0.123	1		Ptpa	0	0.166811	0.534	0.148	0
Esrra	9.41457e-05	0.174958	0.09	0.12	1		Camsap1	2.97012e-15	0.118484	0.095	0.062	4.72724e-11		Prkcsh	0	0.166692	0.652	0.233	0
Ric8a	3.0635e-33	0.174888	0.173	0.306	4.87586e-29		Rhbdf2	1.95314e-38	0.118408	0.065	0.024	3.10862e-34		Nxt1	9.32329e-257	0.166612	0.579	0.224	1.48389e-252
Eif2ak3	0.0303455	0.174811	0.065	0.061	1		Mex3c	1.72192e-10	0.11828	0.146	0.114	2.7406e-06		Zfp207	1.73892e-245	0.166611	0.779	0.335	2.76766e-241
Scoc	0.0297602	0.174749	0.086	0.104	1		Gzmc	0.0148603	0.118023	0.017	0.024	1		Rnf26	0	0.166586	0.317	0.053	0
Gprasp1	0.0452761	0.174625	0.074	0.07	1		Trio	2.61808e-27	0.117918	0.121	0.069	4.16694e-23		Atg101	0	0.166262	0.518	0.139	0
Lrp6	0.000642578	0.174395	0.11	0.142	1		Serinc1	0.00048974	0.117842	0.296	0.301	1		Eif3c	1.18153e-91	0.166187	0.952	0.648	1.88052e-87
Tmem127	5.00683e-15	0.174363	0.111	0.174	7.96886e-11		Ubtd2	2.86246e-74	0.117648	0.049	0.007	4.55589e-70		Dcp2	0	0.166124	0.433	0.106	0
Vkorc1	0.0183594	0.174305	0.075	0.092	1		2900060B14Rik	3.29359e-15	0.117126	0.093	0.06	5.24208e-11		Lmf2	0	0.166092	0.273	0.03	0
Dpm1	3.4723e-28	0.174172	0.191	0.322	5.52652e-24		Gata3	7.25333e-13	0.117077	0.377	0.518	1.15444e-08		Ticrr	0	0.165975	0.198	0.002	0
Socs4	3.09359e-16	0.174163	0.128	0.2	4.92375e-12		B230307C23Rik	0.348639	0.117062	0.224	0.244	1		Fmc1	0	0.165815	0.455	0.113	0
Asb13	5.98863e-07	0.174139	0.108	0.15	0.00953151		Mef2d	0.0789716	0.116642	0.194	0.198	1		Borcs7	0	0.16556	0.311	0.051	0
Brd9	1.3918e-45	0.17409	0.173	0.327	2.21518e-41		Rnps1	0.630466	0.116493	0.359	0.416	1		Mrpl11	0	0.165554	0.659	0.235	0
Atr	3.74661e-14	0.173997	0.129	0.196	5.9631e-10		Lonrf1	1.48799e-108	0.116487	0.052	0.003	2.36829e-104		Stard3nl	0	0.165174	0.429	0.086	0
Wdr89	7.06667e-32	0.173934	0.281	0.481	1.12473e-27		Ptch1	0.0701703	0.116352	0.102	0.097	1		Ubtf	7.47717e-166	0.165137	0.771	0.393	1.19007e-161
BC031181	1.77399e-12	0.173881	0.402	0.655	2.82349e-08		Gm26825	1.97323e-74	0.116345	0.064	0.013	3.1406e-70		Ndufaf7	0	0.16513	0.33	0.054	0
Slc25a23	5.86541e-38	0.173845	0.055	0.019	9.33539e-34		Cnih4	0.194538	0.116192	0.393	0.435	1		Lias	0	0.165035	0.414	0.083	0
Usp53	0.164929	0.173779	0.087	0.101	1		Arf1	1.10542e-08	0.116178	0.788	0.776	0.000175939		Gnai3	6.26168e-244	0.164961	0.755	0.321	9.96609e-240
Fam114a2	2.89182e-41	0.173779	0.19	0.346	4.60263e-37		Rnf11	3.25408e-11	0.116122	0.184	0.148	5.1792e-07		Exo1	0	0.164936	0.187	0.004	0
Ralgapb	1.40098e-05	0.173759	0.086	0.117	0.222979		Stard3	0.0179748	0.115964	0.196	0.197	1		Auh	0	0.164651	0.489	0.116	0
Cggbp1	1.56471e-25	0.173758	0.32	0.541	2.49039e-21		Yars	0.570305	0.115703	0.135	0.143	1		Psmd3	1.95337e-246	0.164645	0.703	0.291	3.10898e-242
Itfg1	3.26158e-18	0.173712	0.119	0.193	5.19113e-14		Brwd1	5.68532e-08	0.115657	0.177	0.15	0.000904876		Nup50	0	0.164494	0.609	0.215	0
Thap3	3.73493e-37	0.173709	0.188	0.336	5.94452e-33		Thumpd3	0.738158	0.115414	0.311	0.359	1		Daxx	0	0.164224	0.415	0.098	0
Chmp5	2.324e-36	0.17369	0.272	0.481	3.69889e-32		Riok1	0.462848	0.115249	0.419	0.487	1		Psmd12	2.20884e-134	0.164182	0.835	0.445	3.51559e-130
Inpp5b	1.32055e-29	0.173634	0.158	0.273	2.10179e-25		Stambpl1	0.692961	0.115207	0.172	0.185	1		Ttc9c	0	0.163977	0.408	0.086	0
Scand1	4.10635e-06	0.173632	0.641	0.753	0.0653566		Micu3	7.93641e-21	0.115183	0.083	0.046	1.26316e-16		Htatsf1	0	0.163888	0.523	0.153	0
Spsb3	2.98258e-42	0.173594	0.196	0.361	4.74707e-38		Tmem109	0.0102652	0.115056	0.143	0.177	1		Espl1	0	0.163883	0.182	0.001	0
Pik3c2a	4.34856e-10	0.173225	0.105	0.154	6.92116e-06		Gm10053	1.58116e-17	0.115035	0.076	0.045	2.51657e-13		Ctla4	0	0.163769	0.188	0.017	0
Usf2	4.02089e-40	0.172961	0.275	0.497	6.39965e-36		Ncoa3	0.422938	0.114748	0.274	0.319	1		Gstp1	0	0.163611	0.424	0.094	0
Frat1	5.66e-17	0.172919	0.059	0.033	9.00846e-13		Rpl31	1.22409e-12	0.114726	0.928	0.884	1.94827e-08		Trp53i13	0	0.163585	0.255	0.024	0
Rps18	1.31961e-129	0.172647	1	0.999	2.10029e-125		Nkrf	5.46534e-25	0.114621	0.066	0.031	8.69863e-21		Fam216a	0	0.163373	0.289	0.041	0
Cd247	5.20654e-27	0.172602	0.314	0.532	8.28674e-23		Atic	0.0721421	0.114587	0.29	0.353	1		Ptpn1	4.51299e-248	0.163295	0.801	0.349	7.18288e-244
Azi2	4.19362e-39	0.172558	0.217	0.388	6.67457e-35		Grpel2	9.18666e-06	0.114581	0.134	0.117	0.146215		Agfg2	0	0.163285	0.376	0.064	0
1700123O20Rik	4.37453e-41	0.172554	0.242	0.442	6.9625e-37		Tmem214	0.575774	0.114572	0.154	0.164	1		Vps51	0	0.162844	0.334	0.059	0
Ccnl1	4.99696e-17	0.17255	0.356	0.566	7.95317e-13		Eif3l	0.00122994	0.114545	0.553	0.582	1		Mtch2	0	0.162811	0.637	0.222	0
Wapl	4.08412e-07	0.172521	0.448	0.696	0.00650029		Uhrf1bp1l	1.36932e-09	0.114452	0.21	0.176	2.1794e-05		Ifi206	0	0.162744	0.548	0.159	0
A930024E05Rik	0.0214214	0.172406	0.096	0.118	1		Sox4	3.17818e-60	0.114401	0.052	0.01	5.05838e-56		Irf9	0	0.162633	0.537	0.158	0
Ndufb11	1.26938e-08	0.172294	0.718	0.81	0.000202035		Pgam5	0.000658833	0.113756	0.145	0.135	1		Desi2	2.01434e-240	0.162494	0.666	0.277	3.20602e-236
Trim65	0.0284246	0.172265	0.073	0.068	1		Zhx2	6.31759e-35	0.113538	0.074	0.03	1.00551e-30		Bnip2	0	0.161872	0.636	0.217	0
Gpatch2	2.41922e-17	0.172225	0.107	0.172	3.85043e-13		Gng12	0.227935	0.113323	0.176	0.206	1		Mrpl10	0	0.16182	0.361	0.067	0
Fbxo8	1.17903e-13	0.17215	0.099	0.154	1.87654e-09		Hyal2	1.19022e-22	0.113288	0.074	0.038	1.89435e-18		Pole2	0	0.161406	0.222	0.015	0
Sorbs1	0.00175442	0.172102	0.056	0.048	1		Ncoa5	1.9693e-05	0.11322	0.122	0.104	0.313435		Atp6v1c1	0	0.161342	0.51	0.14	0
Mlx	4.62246e-37	0.172047	0.192	0.343	7.35711e-33		Eid2	5.95303e-12	0.112585	0.115	0.083	9.47485e-08		Pfdn6	1.18939e-128	0.16134	0.815	0.44	1.89303e-124
C2cd3	2.56133e-22	0.171884	0.109	0.184	4.07661e-18		Tmem88	7.7028e-89	0.112295	0.048	0.004	1.22598e-84		Bbip1	0	0.161229	0.632	0.227	0
Cd93	0.0272038	0.171572	0.061	0.056	1		Fkbp5	2.77253e-05	0.112289	0.161	0.214	0.441276		Gpsm2	0	0.16097	0.161	0.002	0
Ankfy1	9.00931e-27	0.171565	0.12	0.208	1.43392e-22		Ilf2	0.0248843	0.112254	0.402	0.444	1		Commd2	0	0.160957	0.645	0.213	0
Brap	2.21461e-38	0.171523	0.136	0.254	3.52477e-34		Prdm1	0.0183947	0.111948	0.095	0.114	1		Wdhd1	0	0.16085	0.252	0.029	0
Uimc1	9.17492e-38	0.171437	0.197	0.352	1.46028e-33		Zfp263	0.00035651	0.111781	0.161	0.147	1		Adprm	0	0.16071	0.42	0.098	0
Nudt13	0.0195757	0.171405	0.071	0.087	1		Fam129a	0.00110692	0.111704	0.29	0.363	1		Meaf6	0	0.160634	0.436	0.12	0
Pacs1	4.49671e-22	0.171274	0.111	0.188	7.15697e-18		Ptger2	5.12898e-14	0.111653	0.093	0.061	8.16329e-10		Lrr1	0	0.160491	0.184	0.001	0
Klhl18	0.133093	0.171106	0.074	0.073	1		Fam220a	0.000483979	0.11157	0.181	0.169	1		Dgcr6	0	0.160393	0.327	0.054	0
Zbtb37	0.0187031	0.170908	0.077	0.095	1		Lrrc47	0.799382	0.11146	0.177	0.2	1		Cdc34	8.27143e-291	0.160133	0.596	0.218	1.31648e-286
Srrm2	1.16041e-21	0.170833	0.856	0.971	1.84691e-17		Ccdc115	0.985567	0.111393	0.308	0.356	1		Cyba	1.24345e-93	0.160083	0.998	0.929	1.97907e-89
Uqcc3	5.20245e-20	0.170766	0.326	0.537	8.28023e-16		Csnk1e	0.00227482	0.111371	0.138	0.128	1		4930579G24Rik	0	0.160023	0.223	0.011	0
Nek9	8.72955e-07	0.170627	0.094	0.13	0.013894		Ankib1	0.226306	0.111235	0.226	0.24	1		Parpbp	0	0.159929	0.168	0	0
Ttc7	8.37078e-44	0.170562	0.162	0.305	1.33229e-39		Ndufb6	0.00158819	0.111202	0.505	0.545	1		Ccng2	0	0.159607	0.311	0.054	0
Galnt11	1.40335e-13	0.170554	0.132	0.201	2.23357e-09		Zswim8	0.00211091	0.11096	0.2	0.191	1		Get4	0	0.159515	0.389	0.087	0
Apobr	1.50493e-20	0.17038	0.116	0.193	2.39524e-16		Eml5	5.84898e-39	0.110912	0.077	0.03	9.30923e-35		Pcif1	0	0.159416	0.613	0.191	0
Cbx8	0.922907	0.170329	0.073	0.079	1		Mesd	0.00899599	0.110831	0.21	0.209	1		Mrpl20	6.23277e-106	0.159394	0.909	0.533	9.92008e-102
Top3b	1.52108e-20	0.169976	0.109	0.182	2.42095e-16		2700097O09Rik	0.000367324	0.110557	0.109	0.096	1		4930503L19Rik	0	0.159298	0.313	0.044	0
Ebpl	2.53829e-38	0.16996	0.171	0.311	4.03994e-34		Ss18	0.24124	0.110424	0.242	0.261	1		Faap24	0	0.159197	0.335	0.061	0
Alkbh5	2.00189e-38	0.169942	0.198	0.354	3.18621e-34		Rnf219	0.0489734	0.110362	0.157	0.157	1		Unc13d	0	0.159053	0.518	0.125	0
Scarb2	1.4322e-27	0.169868	0.153	0.262	2.27949e-23		Bcap29	0.0470046	0.110358	0.237	0.289	1		Acd	0	0.159003	0.39	0.08	0
Sec22a	1.9817e-13	0.169766	0.101	0.156	3.15408e-09		Tmbim1	2.63577e-21	0.110177	0.072	0.038	4.19508e-17		Slc9a3r1	1.15272e-264	0.158727	0.81	0.338	1.83466e-260
Nckap1l	1.08804e-44	0.169748	0.194	0.363	1.73173e-40		Agpat4	0.624365	0.11014	0.079	0.082	1		Rpl22l1	7.29728e-85	0.158298	0.994	0.865	1.16144e-80
Ccpg1	0.0568993	0.16973	0.065	0.061	1		Srp68	0.255227	0.110112	0.245	0.294	1		Lyrm2	0	0.158135	0.459	0.113	0
Arhgap5	1.23095e-07	0.1697	0.077	0.059	0.00195917		Mrpl47	0.0730429	0.109745	0.123	0.121	1		Ints10	0	0.15802	0.331	0.056	0
Pcsk7	2.04849e-35	0.169625	0.148	0.268	3.26038e-31		Vps50	1.82885e-06	0.109687	0.127	0.106	0.0291079		Rapsn	0	0.157779	0.198	0.016	0
Slc11a2	6.47406e-07	0.169423	0.096	0.133	0.0103041		Smg5	0.426563	0.109528	0.167	0.177	1		Rtca	0	0.157735	0.328	0.054	0
Rgs14	1.68436e-33	0.169385	0.137	0.247	2.68082e-29		Ddx1	0.35281	0.109319	0.286	0.342	1		Nup93	0	0.157512	0.345	0.065	0
Prr14	8.21189e-31	0.169327	0.127	0.227	1.307e-26		H2-K1	1.06931e-15	0.109291	0.999	1	1.70191e-11		Ebpl	0	0.157171	0.48	0.117	0
Zfp322a	1.2794e-28	0.169259	0.13	0.227	2.0363e-24		Rrbp1	0.00166733	0.109165	0.544	0.582	1		Slc35d2	0	0.157136	0.211	0.016	0
Zfp217	5.10301e-09	0.169242	0.09	0.131	8.12195e-05		Lin7c	0.0478997	0.108898	0.246	0.254	1		Trappc6a	0	0.156872	0.557	0.159	0
Csnk1a1	0.0593448	0.169163	0.592	0.82	1		Creld2	0.000531714	0.108884	0.198	0.255	1		Baiap2	0	0.156867	0.277	0.042	0
Plekho2	1.91907e-22	0.169055	0.106	0.181	3.05438e-18		Arl5a	0.175322	0.108376	0.207	0.246	1		Tapbp	9.68789e-163	0.156798	0.9	0.471	1.54192e-158
Tpp1	3.3795e-07	0.169027	0.098	0.137	0.00537882		Cables2	0.000518554	0.108356	0.104	0.092	1		1110008F13Rik	3.90077e-107	0.156582	0.889	0.515	6.20846e-103
Polr2m	5.49488e-13	0.1689	0.415	0.671	8.74565e-09		Rbpms2	5.11445e-103	0.10812	0.042	0.001	8.14016e-99		Anapc7	0	0.156321	0.402	0.088	0
Slc35e1	5.17017e-18	0.168656	0.117	0.188	8.22885e-14		Mllt1	4.52661e-08	0.107652	0.091	0.069	0.000720455		Mrpl55	0	0.156301	0.508	0.143	0
Tor4a	0.128552	0.168438	0.074	0.087	1		Tmem39a	2.20176e-06	0.107562	0.103	0.084	0.0350433		Vps35	0	0.156125	0.568	0.174	0
Atp6v0d2	7.0341e-70	0.168432	0.045	0.005	1.11955e-65		Mlxip	9.22091e-06	0.10739	0.126	0.106	0.14676		Troap	0	0.155998	0.166	0.001	0
Sys1	0.00462093	0.168405	0.454	0.662	1		Golga7	0.108866	0.10714	0.346	0.385	1		Txndc12	0	0.155399	0.315	0.048	0
Rpl11	1.00395e-122	0.168362	1	0.999	1.59788e-118		Zfp397	0.138919	0.107096	0.247	0.259	1		Cyth4	0	0.154935	0.776	0.292	0
Usp24	2.03799e-22	0.168332	0.164	0.266	3.24366e-18		Zfp800	0.114329	0.106921	0.327	0.356	1		Nubp2	0	0.154929	0.53	0.166	0
Rhoc	2.81913e-22	0.168183	0.125	0.208	4.48693e-18		Zfp553	0.00538762	0.106749	0.156	0.149	1		Thoc7	3.31309e-151	0.154659	0.831	0.425	5.27311e-147
Dnajc14	3.66695e-33	0.168108	0.136	0.245	5.83631e-29		Atp23	0.000108967	0.106703	0.122	0.107	1		Tmem208	7.61811e-216	0.154551	0.792	0.352	1.2125e-211
Cog5	6.58065e-09	0.168071	0.097	0.14	0.000104738		Mphosph8	0.691714	0.106576	0.388	0.443	1		Pop7	7.57088e-300	0.154494	0.636	0.231	1.20498e-295
Gm26699	3.66733e-21	0.167953	0.153	0.247	5.83692e-17		Uchl5	0.527808	0.1065	0.336	0.379	1		Fibp	0	0.154145	0.61	0.183	0
Ncald	5.37683e-12	0.167908	0.051	0.031	8.55777e-08		Jmy	1.8902e-16	0.105994	0.113	0.074	3.00845e-12		Hist1h2ak	0	0.154129	0.183	0.006	0
Fopnl	5.19619e-45	0.167795	0.171	0.323	8.27026e-41		Dnajc27	5.66335e-24	0.105789	0.066	0.031	9.01378e-20		Ift52	0	0.154074	0.364	0.07	0
Gapvd1	1.36468e-35	0.167669	0.2	0.349	2.17202e-31		Nr1d2	4.06671e-40	0.105716	0.105	0.047	6.47258e-36		Afg3l1	0	0.153951	0.475	0.125	0
Zfp780b	0.235322	0.167637	0.073	0.084	1		Taf1a	1.82076e-25	0.105592	0.071	0.034	2.89792e-21		Wrn	0	0.153907	0.419	0.088	0
Ormdl1	1.59088e-36	0.167344	0.156	0.283	2.53205e-32		2810004N23Rik	0.586819	0.105427	0.289	0.337	1		Mylpf	0	0.153216	0.195	0.011	0
Dmac1	8.35615e-37	0.167335	0.275	0.488	1.32997e-32		Wnk1	0.301796	0.105381	0.567	0.636	1		Sdhaf2	0	0.153106	0.53	0.155	0
Ccdc47	1.28162e-37	0.167117	0.281	0.498	2.03982e-33		Tmem41a	1.101e-25	0.105341	0.073	0.035	1.75235e-21		Smarcd1	0	0.153102	0.377	0.082	0
Selenof	0.0106611	0.167017	0.583	0.802	1		Necap1	1.09422e-10	0.105168	0.092	0.065	1.74156e-06		Dapp1	0	0.153039	0.408	0.093	0
Faap20	7.37329e-41	0.16696	0.182	0.335	1.17353e-36		Sec13	0.907329	0.105013	0.339	0.398	1		Spint2	3.30803e-304	0.152996	0.613	0.22	5.26507e-300
Trappc6a	2.28067e-38	0.166872	0.209	0.376	3.62992e-34		Ppp1cb	0.000871035	0.104977	0.416	0.447	1		Gcc2	0	0.152794	0.588	0.182	0
Zfp397	6.37401e-25	0.166795	0.18	0.297	1.01449e-20		Cox16	0.563269	0.104775	0.139	0.148	1		Dtd2	0	0.152726	0.322	0.055	0
Mprip	7.43477e-12	0.166778	0.1	0.151	1.18332e-07		Zdhhc9	5.64821e-23	0.104613	0.067	0.033	8.98968e-19		Hes6	0	0.152542	0.456	0.105	0
Unc13d	8.23253e-53	0.166695	0.174	0.34	1.31029e-48		Rragd	2.16246e-87	0.104602	0.045	0.003	3.44178e-83		A430005L14Rik	0	0.152516	0.517	0.159	0
Pmm2	5.48424e-43	0.166692	0.201	0.367	8.72872e-39		Lsm2	0.000474945	0.104512	0.506	0.506	1		Abcb9	0	0.15237	0.664	0.236	0
Crebl2	2.83621e-16	0.166447	0.053	0.029	4.51411e-12		Prdm4	9.11649e-08	0.104429	0.086	0.065	0.00145098		Ptgr2	0	0.152346	0.371	0.069	0
Ifitm10	3.49766e-12	0.16633	0.089	0.137	5.56688e-08		Tiparp	1.61437e-11	0.104396	0.071	0.046	2.56943e-07		Psmd4	1.23213e-114	0.152202	0.925	0.544	1.96106e-110
Gm10036	2.96634e-09	0.166283	0.125	0.179	4.72123e-05		Ndel1	0.0328557	0.104268	0.196	0.198	1		Mpv17l2	0	0.152031	0.428	0.091	0
Slu7	2.3769e-45	0.166136	0.237	0.437	3.78308e-41		Spryd4	2.68954e-08	0.10388	0.093	0.071	0.000428067		Mrpl2	0	0.151868	0.498	0.14	0
Lipa	1.79563e-13	0.166051	0.103	0.159	2.85792e-09		Zfp655	0.0901566	0.103796	0.175	0.178	1		Bola2	1.44666e-201	0.151651	0.77	0.352	2.30251e-197
Wbp1l	3.45124e-19	0.16583	0.108	0.178	5.493e-15		Nr2c2ap	0.971078	0.103761	0.238	0.269	1		Tfam	7.46898e-288	0.151622	0.68	0.26	1.18876e-283
Vps13d	7.30939e-09	0.165821	0.099	0.143	0.000116336		Gm17322	6.20906e-36	0.103474	0.046	0.014	9.88234e-32		Tox2	9.85447e-194	0.151549	0.096	0.003	1.56844e-189
Cfl2	3.31609e-27	0.165815	0.14	0.241	5.27789e-23		Paip1	0.0344583	0.103189	0.172	0.17	1		Sntb2	0	0.151429	0.611	0.17	0
Abhd18	1.25333e-09	0.165811	0.081	0.12	1.9948e-05		Prelid3b	0.893815	0.102876	0.341	0.395	1		Skap2	0	0.151429	0.333	0.056	0
Tmem60	2.27163e-45	0.165659	0.167	0.317	3.61553e-41		Exosc7	0.60713	0.102788	0.378	0.439	1		Gpr108	0	0.151309	0.386	0.083	0
Safb2	2.23399e-39	0.165579	0.273	0.488	3.55562e-35		Bag2	7.41049e-11	0.102755	0.059	0.037	1.17945e-06		Mrpl39	0	0.151302	0.429	0.105	0
Thy1	0.00371394	0.165465	0.693	0.857	1		Wdr48	0.0813503	0.102752	0.172	0.205	1		Rnps1	1.59417e-264	0.151299	0.636	0.247	2.53728e-260
Trim33	2.63507e-39	0.164973	0.164	0.3	4.19398e-35		Gem	0.000102691	0.102569	0.126	0.163	1		Pnpla2	0	0.151237	0.456	0.116	0
Mcm9	7.25216e-09	0.164852	0.088	0.128	0.000115425		Ndufa5	0.019289	0.102383	0.498	0.546	1		Il21	6.6941e-265	0.15121	0.127	0.004	1.06543e-260
Rnpepl1	6.85002e-36	0.164807	0.148	0.269	1.09025e-31		Gm17056	2.94676e-56	0.102114	0.058	0.014	4.69006e-52		Impdh2	5.62978e-164	0.151187	0.706	0.349	8.96036e-160
Phospho2	1.99709e-13	0.164639	0.099	0.154	3.17856e-09		Thoc7	0.000679373	0.102058	0.563	0.595	1		Sumo3	3.66811e-301	0.151152	0.646	0.237	5.83817e-297
Ankrd13a	3.89694e-44	0.164576	0.221	0.405	6.20237e-40		Hspa14	0.15909	0.102035	0.428	0.479	1		Paqr4	0	0.150983	0.176	0.001	0
C2cd5	2.98531e-33	0.16456	0.123	0.225	4.75142e-29		Ewsr1	0.000886339	0.101931	0.63	0.657	1		Dusp11	5.79948e-185	0.150878	0.842	0.409	9.23046e-181
Pea15a	0.0143935	0.164496	0.076	0.094	1		Pelp1	0.0276875	0.101787	0.143	0.175	1		Dus1l	0	0.150691	0.458	0.124	0
Mpv17	0.00180042	0.164377	0.079	0.101	1		Rpp38	2.47497e-10	0.101775	0.09	0.064	3.93916e-06		Ctss	2.59422e-278	0.150394	0.388	0.117	4.12896e-274
Fam193b	4.4338e-20	0.164361	0.112	0.186	7.05683e-16		Dpagt1	0.979532	0.101725	0.113	0.122	1		Vamp5	0	0.150102	0.429	0.103	0
Pafah1b1	0.0869235	0.164325	0.504	0.721	1		Bclaf3	0.0272911	0.101522	0.14	0.169	1		3830406C13Rik	0	0.150007	0.621	0.195	0
Ino80d	2.28644e-25	0.163895	0.157	0.261	3.63911e-21		Hdac4	0.0184157	0.101468	0.14	0.133	1		Ap3b1	0	0.149626	0.58	0.178	0
Ranbp9	4.88269e-38	0.163863	0.164	0.299	7.77129e-34		Ahi1	7.4492e-07	0.101412	0.084	0.064	0.0118561		Ptrh2	0	0.149608	0.435	0.115	0
Yy1	2.01773e-09	0.163807	0.443	0.701	3.21141e-05		Thyn1	0.224937	0.10141	0.257	0.308	1		Sh3bp1	0	0.149589	0.449	0.097	0
Spcs2	1.19487e-12	0.163774	0.819	0.938	1.90175e-08		Zc3h18	0.877764	0.101384	0.319	0.371	1		Mastl	0	0.149577	0.188	0.006	0
Slc35a1	5.55054e-05	0.163758	0.097	0.129	0.883424		Slc35f2	2.46775e-18	0.101276	0.074	0.042	3.92767e-14		Ttc7	0	0.149527	0.472	0.111	0
Rtp4	3.81751e-07	0.163736	0.153	0.205	0.00607594		Ncbp2	0.167368	0.100857	0.317	0.385	1		Jakmip1	0	0.14916	0.593	0.163	0
Prps2	6.8489e-31	0.16361	0.138	0.244	1.09007e-26		Ube2g2	0.193134	0.100841	0.253	0.271	1		Nckap1l	0	0.149011	0.537	0.149	0
Rest	3.81312e-32	0.163588	0.297	0.512	6.06896e-28		Dnajc2	0.697596	0.100785	0.539	0.589	1		Sccpdh	2.74406e-210	0.148948	0.108	0.005	4.36745e-206
Kif5b	5.80725e-07	0.16354	0.462	0.722	0.00924282		Trit1	6.34507e-10	0.10069	0.09	0.065	1.00988e-05		Metap2	2.10606e-129	0.148769	0.814	0.436	3.35201e-125
Lpxn	1.02517e-32	0.163507	0.275	0.472	1.63166e-28		Atf5	5.53493e-11	0.100579	0.071	0.047	8.80939e-07		Pxmp4	0	0.148721	0.259	0.034	0
Serinc1	1.05747e-34	0.163467	0.202	0.352	1.68306e-30		Smg1	0.376674	0.100041	0.34	0.375	1		Nsdhl	0	0.148704	0.234	0.024	0
Stxbp3	2.24817e-26	0.163438	0.143	0.244	3.57819e-22		Ccny	0.031429	0.0996679	0.205	0.206	1		Pygb	0	0.148658	0.306	0.049	0
Bsdc1	4.81739e-12	0.163432	0.097	0.147	7.66736e-08		Arv1	5.38413e-13	0.0996424	0.077	0.05	8.56938e-09		Dxo	0	0.148517	0.332	0.055	0
Rap2c	3.30948e-45	0.163338	0.2	0.37	5.26738e-41		Rev1	1.67161e-10	0.0994838	0.109	0.079	2.66054e-06		Unc119b	0	0.148469	0.488	0.139	0
Znfx1	2.15661e-05	0.163335	0.078	0.106	0.343246		Gars	0.179892	0.0993209	0.331	0.398	1		0610012G03Rik	1.07539e-301	0.148253	0.722	0.274	1.71159e-297
Pgls	7.96566e-05	0.163247	0.451	0.686	1		Man2a2	0.0263961	0.0992408	0.153	0.145	1		Snrnp27	4.2239e-298	0.148065	0.651	0.239	6.72277e-294
H2-T23	0.000249439	0.163241	0.698	0.86	1		Alg3	0.422373	0.0992239	0.088	0.089	1		Sash3	0	0.147818	0.644	0.196	0
Cyba	1.64777e-20	0.163213	0.951	0.96	2.6226e-16		Dph5	0.813624	0.0991342	0.213	0.237	1		Faap20	0	0.147766	0.507	0.132	0
Mov10	6.71202e-08	0.163185	0.094	0.134	0.00106828		Notch2	0.000317465	0.0989559	0.113	0.098	1		Dcp1b	4.51967e-236	0.147604	0.215	0.044	7.1935e-232
Grcc10	1.22623e-15	0.163065	0.13	0.203	1.95166e-11		Tmem70	0.474859	0.0988867	0.233	0.272	1		Susd3	0	0.147397	0.369	0.069	0
Acaa1a	3.31309e-40	0.162811	0.165	0.305	5.27312e-36		Klhl2	1.88466e-07	0.0988826	0.108	0.085	0.00299963		Rfwd3	0	0.147395	0.353	0.074	0
Exoc3	2.32262e-48	0.162741	0.239	0.444	3.69669e-44		Zfp598	0.234261	0.0988489	0.121	0.123	1		Ppp1r7	0	0.146981	0.567	0.187	0
Arnt	5.56646e-07	0.162629	0.08	0.113	0.00885958		Tcea1	0.465984	0.0988155	0.414	0.473	1		Crnkl1	0	0.146857	0.511	0.146	0
Fnta	1.92501e-47	0.162471	0.218	0.411	3.06385e-43		Uqcc2	0.00812819	0.0984015	0.532	0.572	1		Cenpc1	0	0.146721	0.334	0.076	0
Tmem219	3.0028e-33	0.162469	0.138	0.249	4.77926e-29		Cherp	0.547838	0.0983665	0.188	0.201	1		Pqbp1	0	0.146606	0.52	0.154	0
Mdm2	3.42213e-44	0.162459	0.203	0.373	5.44666e-40		L2hgdh	2.49576e-16	0.0982853	0.068	0.039	3.97225e-12		Hdac3	0	0.146574	0.46	0.121	0
Rnaset2b	1.02844e-33	0.162349	0.131	0.237	1.63687e-29		Fam207a	0.00888508	0.0981509	0.279	0.353	1		Cox18	0	0.146541	0.387	0.086	0
Znrd1	5.64536e-17	0.16234	0.371	0.612	8.98516e-13		Ythdf3	0.000455711	0.0981224	0.215	0.204	1		Man2a1	0	0.146532	0.372	0.072	0
Cnpy2	3.05808e-23	0.161726	0.32	0.534	4.86725e-19		Ankrd13b	5.63193e-36	0.0980022	0.051	0.016	8.96378e-32		Ska3	0	0.146489	0.174	0.001	0
N6amt1	9.55446e-31	0.161661	0.14	0.246	1.52069e-26		Paip2b	6.26315e-05	0.09786	0.159	0.141	0.996843		Ube2b	3.94925e-128	0.146097	0.914	0.507	6.28562e-124
Zfp738	6.2724e-07	0.161506	0.091	0.127	0.00998314		AW209491	2.01732e-19	0.0977282	0.093	0.055	3.21077e-15		Ocel1	0	0.145859	0.329	0.059	0
Hibadh	7.10534e-36	0.161502	0.181	0.321	1.13089e-31		Adrm1	0.580876	0.0974367	0.366	0.423	1		Prpf18	0	0.14572	0.444	0.112	0
Abcb9	3.63003e-34	0.161481	0.277	0.477	5.77756e-30		Tmem165	0.106529	0.0971569	0.333	0.409	1		Oas1a	2.24729e-244	0.145533	0.178	0.026	3.57678e-240
Lemd2	3.10186e-21	0.161475	0.121	0.2	4.93692e-17		Twnk	2.68e-17	0.0971191	0.076	0.044	4.26548e-13		Cfap20	0	0.14553	0.431	0.107	0
Dnajb2	5.69406e-16	0.161473	0.065	0.039	9.06267e-12		Ash1l	0.000884936	0.0970875	0.444	0.47	1		Smim4	0	0.145508	0.431	0.104	0
Selenot	9.6754e-41	0.161426	0.276	0.495	1.53994e-36		Taf15	0.000162829	0.0970085	0.537	0.57	1		Echs1	0	0.14547	0.53	0.149	0
Pitpnm1	8.37768e-20	0.161241	0.106	0.176	1.33339e-15		Agk	0.36067	0.096859	0.211	0.224	1		Smarce1	4.74245e-160	0.145451	0.808	0.399	7.54809e-156
Svil	2.01644e-38	0.161207	0.153	0.279	3.20936e-34		Ralgds	6.9034e-20	0.0968386	0.066	0.034	1.09875e-15		Tmbim4	0	0.145358	0.679	0.239	0
Rc3h1	2.78707e-16	0.160934	0.169	0.259	4.4359e-12		Tmem267	1.98778e-20	0.0966341	0.052	0.024	3.16375e-16		Stk4	6.72593e-229	0.145232	0.826	0.364	1.0705e-224
Slmap	1.59353e-25	0.160891	0.117	0.203	2.53626e-21		Rpl36al	1.5308e-05	0.0963642	0.72	0.739	0.243642		Psmd10	0	0.145193	0.549	0.161	0
Fbrs	1.43968e-12	0.160836	0.113	0.17	2.2914e-08		Zcrb1	0.0333421	0.0962544	0.519	0.573	1		Plgrkt	1.17055e-217	0.145109	0.863	0.394	1.86304e-213
Mast3	7.50524e-19	0.16077	0.105	0.173	1.19453e-14		Atp13a1	0.457386	0.0961351	0.17	0.192	1		Cdc25c	0	0.144917	0.152	0	0
Dram2	2.90263e-09	0.160742	0.087	0.128	4.61982e-05		Sec24b	0.0635746	0.0959219	0.159	0.158	1		Chek1	0	0.144856	0.174	0.004	0
Vamp5	1.22257e-35	0.16062	0.153	0.276	1.94584e-31		Sik3	0.14086	0.0957821	0.194	0.228	1		Ptbp1	4.90829e-188	0.144596	0.748	0.351	7.81203e-184
Zfand3	1.10689e-34	0.160552	0.148	0.265	1.76173e-30		Plk2	9.63878e-30	0.0957141	0.027	0.006	1.53411e-25		Tax1bp3	0	0.1445	0.213	0.021	0
4921524J17Rik	2.1101e-44	0.160538	0.171	0.32	3.35844e-40		Ddr1	1.16515e-29	0.0956725	0.062	0.026	1.85445e-25		1110034G24Rik	0	0.144459	0.346	0.075	0
Ercc5	0.00475937	0.160407	0.072	0.09	1		Rara	1.56632e-15	0.0956029	0.101	0.065	2.49295e-11		Dazap2	4.61718e-217	0.144412	0.827	0.374	7.34871e-213
Tra2a	0.0738788	0.160386	0.507	0.729	1		Psmd1	0.687463	0.0953985	0.333	0.389	1		Ykt6	0	0.144382	0.413	0.1	0
2610507B11Rik	4.91072e-32	0.160374	0.155	0.272	7.8159e-28		Hectd2	2.00655e-39	0.0952859	0.056	0.018	3.19363e-35		Nipsnap1	0	0.144345	0.302	0.05	0
Tmem203	3.87682e-24	0.160317	0.116	0.198	6.17034e-20		Usp42	0.00166682	0.0950312	0.113	0.101	1		Micu1	0	0.14425	0.33	0.057	0
Mrpl24	1.1924e-23	0.160095	0.357	0.604	1.89782e-19		Gfpt1	0.0820476	0.0950205	0.159	0.189	1		Rabepk	0	0.144147	0.377	0.077	0
Cxcr3	0.00450915	0.160048	0.605	0.688	1		Aacs	9.40528e-06	0.0949758	0.082	0.065	0.149694		Lztfl1	8.31004e-202	0.144121	0.511	0.213	1.32263e-197
Dnajc4	6.51964e-35	0.160046	0.123	0.228	1.03767e-30		Gigyf2	0.418719	0.0947931	0.284	0.309	1		Zfp414	0	0.144096	0.249	0.028	0
Eif5	7.81074e-18	0.159971	0.712	0.88	1.24316e-13		Snx18	0.0549992	0.0946825	0.159	0.156	1		Ppp2r3c	0	0.143811	0.396	0.087	0
Tec	4.85828e-07	0.159898	0.054	0.039	0.00773244		Sec14l1	0.4086	0.0945915	0.112	0.115	1		Itgb3bp	0	0.143784	0.314	0.054	0
Rnf11	9.72396e-08	0.159788	0.126	0.174	0.00154766		Prkci	2.66243e-42	0.0945732	0.055	0.016	4.23752e-38		Chmp5	0	0.143744	0.674	0.232	0
Trp53	9.85217e-09	0.159765	0.426	0.657	0.000156807		Atf1	0.556215	0.0945615	0.352	0.401	1		Immt	4.29757e-194	0.143659	0.76	0.354	6.84002e-190
Tmem156	3.21194e-12	0.159734	0.1	0.152	5.11213e-08		Swap70	0.000599405	0.0944766	0.098	0.085	1		Fancl	0	0.143465	0.262	0.033	0
Mien1	0.0147748	0.15959	0.475	0.695	1		Zwint	0.31605	0.0944615	0.328	0.392	1		Serpinb1a	5.17548e-205	0.1433	0.15	0.022	8.23729e-201
Usp32	0.268568	0.159558	0.068	0.067	1		Uba5	0.0221485	0.0943074	0.23	0.281	1		Stil	0	0.14326	0.169	0	0
Otud1	2.39413e-11	0.159504	0.057	0.037	3.8105e-07		Ppp2cb	0.0169129	0.0942811	0.21	0.26	1		Sub1	1.02705e-146	0.143071	1	0.948	1.63465e-142
Hsbp1	1.13994e-22	0.159322	0.359	0.599	1.81433e-18		Ube2j2	0.0118487	0.0942054	0.464	0.516	1		Gm4070	0	0.142984	0.251	0.036	0
Was	2.51948e-19	0.15909	0.349	0.568	4.01e-15		Mrps10	0.00711722	0.0941885	0.235	0.294	1		Fars2	0	0.142971	0.315	0.058	0
Erlec1	2.03819e-58	0.158996	0.188	0.372	3.24399e-54		Zbtb41	2.40069e-06	0.0941423	0.104	0.083	0.0382094		Klhdc2	0	0.142927	0.455	0.12	0
Prkce	0.194232	0.158779	0.063	0.061	1		Dhrs13	3.74919e-05	0.0941025	0.062	0.048	0.596721		Blm	0	0.142744	0.276	0.04	0
Gm20342	5.9493e-06	0.158696	0.076	0.104	0.094689		Lonp1	0.0503493	0.0938353	0.156	0.187	1		Prpf38a	3.62793e-298	0.142697	0.602	0.214	5.77421e-294
Atf2	1.82276e-28	0.158625	0.139	0.24	2.90111e-24		Mphosph6	0.00489663	0.0936829	0.2	0.251	1		Gen1	0	0.14252	0.177	0.003	0
Nkg7	1.32798e-16	0.158547	0.841	0.852	2.11362e-12		Flvcr1	4.28367e-09	0.0935293	0.072	0.05	6.81789e-05		Ubn1	7.07886e-278	0.142479	0.743	0.294	1.12667e-273
Rcor1	9.29876e-38	0.15846	0.172	0.31	1.47999e-33		1700017B05Rik	0.0744278	0.093371	0.148	0.175	1		Dda1	1.85773e-261	0.142141	0.661	0.258	2.95677e-257
Klf7	0.428748	0.158404	0.068	0.069	1		N4bp2	0.186916	0.0929969	0.149	0.15	1		Hnrnpm	3.27242e-95	0.14206	0.88	0.532	5.20839e-91
Herc2	1.21581e-28	0.158385	0.125	0.219	1.93508e-24		Sfmbt1	0.000139238	0.0925769	0.085	0.071	1		Pef1	0	0.141996	0.363	0.071	0
Lcor	0.0336265	0.158363	0.08	0.096	1		Pou2af1	2.22628e-14	0.092342	0.047	0.025	3.54334e-10		Cenpq	0	0.141936	0.445	0.103	0
Oxa1l	3.90928e-48	0.158302	0.242	0.451	6.22202e-44		Yae1d1	0.00625935	0.0922167	0.129	0.119	1		Arhgap30	9.14222e-203	0.141721	0.887	0.426	1.45508e-198
Rras2	1.88999e-05	0.158282	0.084	0.113	0.300811		Lats1	6.33142e-06	0.0916853	0.126	0.105	0.100771		Rap2a	1.42908e-307	0.14149	0.211	0.027	2.27453e-303
Ppm1a	7.07771e-40	0.158244	0.211	0.379	1.12649e-35		Prr3	0.0384552	0.0915739	0.131	0.126	1		Traip	0	0.141483	0.183	0.003	0
Pik3r5	4.28017e-09	0.158181	0.086	0.126	6.81232e-05		Cspp1	0.601272	0.0914986	0.233	0.263	1		Lrrfip1	5.48031e-127	0.141284	0.935	0.563	8.72246e-123
Isg15	5.74342e-05	0.158179	0.236	0.306	0.914122		Rpp40	4.19786e-11	0.0914899	0.067	0.043	6.68132e-07		Msh2	0	0.14098	0.452	0.125	0
Tsc22d2	3.27816e-08	0.158133	0.155	0.215	0.000521752		Ints6	0.44204	0.091395	0.281	0.306	1		Shisa5	1.49137e-60	0.140962	1	0.922	2.37367e-56
Uhmk1	3.58497e-31	0.158118	0.15	0.263	5.70583e-27		Rps3a1	1.69959e-51	0.091343	0.998	1	2.70507e-47		Hist2h2bb	0	0.140889	0.208	0.023	0
Trps1	0.00734283	0.158106	0.08	0.1	1		Slc31a1	0.40419	0.0911231	0.092	0.094	1		Mcrip1	0	0.140825	0.662	0.228	0
Sin3a	9.11577e-35	0.158093	0.129	0.236	1.45087e-30		Gpr89	0.0245979	0.0907952	0.132	0.161	1		Tdp1	0	0.140645	0.255	0.034	0
Ddx55	1.10847e-31	0.158054	0.157	0.275	1.76424e-27		Cmtr2	1.50743e-35	0.0907872	0.056	0.019	2.39922e-31		Vps72	0	0.140639	0.441	0.103	0
Crk	2.13191e-27	0.158027	0.14	0.24	3.39314e-23		Cdk9	0.0569505	0.0907107	0.425	0.476	1		Tnfaip8l1	4.11189e-301	0.140456	0.155	0.008	6.54449e-297
Kmt2b	3.25736e-38	0.157981	0.156	0.285	5.18441e-34		Map3k14	0.0472528	0.0906884	0.123	0.118	1		Ccnd3	6.8462e-161	0.140434	0.88	0.477	1.08964e-156
Mesd	1.90027e-24	0.157974	0.146	0.243	3.02447e-20		Ptbp2	0.103771	0.0906462	0.118	0.115	1		Fbxo22	0	0.140406	0.457	0.115	0
Pogz	0.000208674	0.157909	0.093	0.122	1		Itpkc	2.50594e-25	0.0906413	0.055	0.023	3.98846e-21		Card19	0	0.140372	0.417	0.088	0
Uty	2.09021e-08	0.157785	0.092	0.132	0.000332677		Naa16	0.0149127	0.0906403	0.192	0.233	1		Rab29	0	0.140272	0.229	0.024	0
Map3k3	0.0534755	0.157783	0.066	0.08	1		Nfix	1.42111e-29	0.090325	0.051	0.019	2.26184e-25		Ssbp4	1.20857e-155	0.139983	0.841	0.421	1.92356e-151
Ccm2	3.71917e-34	0.157759	0.292	0.512	5.91944e-30		Opa3	0.936884	0.0902686	0.11	0.118	1		Toe1	0	0.139803	0.392	0.089	0
A630072M18Rik	6.39031e-19	0.157727	0.09	0.15	1.01708e-14		Stk11	0.599946	0.0900114	0.289	0.335	1		Gm26782	0	0.139781	0.254	0.042	0
Nbdy	0.998346	0.157545	0.072	0.077	1		Gnaq	6.47807e-27	0.0899269	0.06	0.025	1.03105e-22		Dmac1	0	0.139662	0.674	0.24	0
Rap2b	2.97106e-42	0.157458	0.163	0.304	4.72873e-38		Zbtb44	0.0688878	0.0898931	0.134	0.13	1		Jpt2	0	0.139604	0.294	0.053	0
Ezh1	1.77366e-18	0.157279	0.102	0.167	2.82295e-14		Timm44	0.00129356	0.0896224	0.235	0.298	1		Ccne2	0	0.139602	0.152	0.004	0
D3Ertd751e	0.00477006	0.157231	0.062	0.078	1		Cdc25a	0.00895086	0.0893814	0.125	0.154	1		Mcts1	1.16837e-275	0.139537	0.714	0.279	1.85958e-271
Lpin1	0.000919798	0.157216	0.071	0.092	1		Exosc10	0.0133144	0.0893	0.197	0.241	1		Tbcc	0	0.139536	0.46	0.116	0
Dnajb4	5.60031e-08	0.157187	0.058	0.041	0.000891346		Ankrd49	0.835024	0.089288	0.146	0.159	1		Scly	0	0.139522	0.346	0.065	0
Erbin	3.26563e-32	0.157176	0.264	0.449	5.19758e-28		Areg	2.53504e-23	0.0889468	0.009	0	4.03478e-19		Uchl5	5.13271e-234	0.139353	0.577	0.23	8.16922e-230
Nae1	2.09723e-50	0.156984	0.195	0.372	3.33795e-46		Ercc6	1.40668e-06	0.0886611	0.083	0.064	0.0223887		Traf5	0	0.139317	0.458	0.128	0
Trgv2	0.000247994	0.156925	0.097	0.125	1		Ecd	0.00109191	0.0886529	0.186	0.234	1		Mien1	5.39715e-144	0.139108	0.867	0.452	8.59011e-140
Washc4	3.0617e-23	0.156872	0.113	0.192	4.873e-19		Naa30	3.42851e-07	0.0884084	0.153	0.127	0.00545682		Rit1	0	0.138958	0.374	0.074	0
Dnaja1	1.34858e-45	0.15684	0.832	0.939	2.1464e-41		Bach1	6.90773e-07	0.0882595	0.105	0.082	0.0109943		Ptp4a3	0	0.13849	0.594	0.201	0
Atpaf1	3.12155e-21	0.156742	0.107	0.179	4.96826e-17		Safb2	0.68636	0.088248	0.373	0.425	1		Coa4	0	0.138405	0.302	0.053	0
Spata6	0.00066077	0.15672	0.076	0.099	1		Gfer	0.0178184	0.0882419	0.289	0.361	1		Tsfm	8.24208e-295	0.138322	0.546	0.188	1.31181e-290
Kdm3a	3.27952e-07	0.156716	0.084	0.119	0.00521969		Lars	0.0260781	0.0882364	0.267	0.329	1		Cox14	1.31713e-246	0.138287	0.752	0.313	2.09634e-242
Smim19	4.67297e-34	0.156494	0.121	0.223	7.4375e-30		Perp	2.58241e-10	0.0881935	0.047	0.079	4.11017e-06		Ola1	1.97042e-163	0.138254	0.803	0.389	3.13613e-159
Vav1	1.27373e-41	0.156482	0.178	0.327	2.02728e-37		Rpl8	2.56003e-40	0.0880688	1	1	4.07455e-36		Pole3	0	0.138167	0.455	0.134	0
Ctdspl2	5.36405e-43	0.156457	0.167	0.312	8.53742e-39		B4galt5	0.303947	0.0879545	0.109	0.123	1		Chmp6	0	0.137924	0.427	0.1	0
Zfp994	1.70673e-08	0.156424	0.083	0.12	0.000271643		Srsf9	0.121048	0.0879109	0.57	0.619	1		Kat5	0	0.137806	0.3	0.053	0
1190002N15Rik	0.0277809	0.156349	0.071	0.086	1		Ncbp1	0.00328172	0.0878707	0.217	0.273	1		Dctn1	0	0.137556	0.395	0.084	0
Fem1c	1.57524e-16	0.156303	0.114	0.18	2.50715e-12		Pold2	0.00330169	0.087789	0.197	0.247	1		Rps29	4.95327e-95	0.137498	1	0.997	7.88363e-91
Nkap	2.80972e-48	0.15617	0.197	0.372	4.47195e-44		Senp5	0.0568601	0.0877312	0.12	0.115	1		Kin	0	0.13748	0.523	0.15	0
Ccrl2	5.70527e-07	0.156115	0.062	0.047	0.00908051		Gm21887	2.90297e-28	0.0876867	0.043	0.015	4.62037e-24		Copb1	2.36029e-228	0.137422	0.74	0.318	3.75664e-224
2610008E11Rik	0.752801	0.155974	0.065	0.071	1		Gm11361	9.40851e-26	0.0875658	0.108	0.059	1.49746e-21		Lsm10	0	0.137377	0.416	0.098	0
Spopl	7.96425e-16	0.155811	0.118	0.185	1.26759e-11		Fads6	1.7206e-43	0.0874332	0.051	0.014	2.73851e-39		Katnb1	0	0.137249	0.292	0.042	0
Ncoa6	1.83319e-07	0.155782	0.093	0.13	0.00291771		Med7	0.0450705	0.0872334	0.123	0.147	1		Mrps14	9.97482e-88	0.137197	0.917	0.576	1.58759e-83
Ensa	4.45576e-44	0.155778	0.19	0.351	7.09178e-40		Gtpbp6	0.584146	0.0870337	0.121	0.134	1		Rdx	1.49346e-162	0.137038	0.768	0.38	2.37699e-158
Khk	0.404243	0.155742	0.059	0.059	1		Usp50	0.0112037	0.086983	0.132	0.163	1		Fam192a	0	0.136898	0.577	0.189	0
Zfp518a	1.8396e-27	0.155731	0.109	0.193	2.92791e-23		Fkrp	0.350546	0.0869597	0.142	0.146	1		Mrpl9	1.26565e-277	0.136853	0.649	0.248	2.0144e-273
Acap1	3.54573e-35	0.155707	0.288	0.502	5.64338e-31		Nfil3	3.24373e-05	0.0868244	0.042	0.03	0.516272		1110059E24Rik	0	0.136713	0.318	0.054	0
Terf2ip	3.93615e-23	0.155616	0.105	0.181	6.26478e-19		Cul2	0.0426503	0.0867335	0.146	0.175	1		Puf60	1.61317e-150	0.136648	0.83	0.421	2.56752e-146
Iqsec1	8.22903e-09	0.15555	0.095	0.136	0.000130973		Nr6a1	3.4724e-81	0.0866759	0.041	0.003	5.52668e-77		Gemin2	0	0.136569	0.333	0.057	0
Tmed7	9.64607e-45	0.155496	0.207	0.38	1.53527e-40		Atp6v0b	0.0436194	0.0866424	0.507	0.572	1		Map7d1	0	0.13626	0.404	0.088	0
Kdm6a	4.071e-18	0.155423	0.104	0.169	6.47941e-14		Atg2b	0.000392655	0.0866027	0.08	0.066	1		Xrn1	0	0.136205	0.611	0.195	0
Xrcc4	1.84799e-18	0.155079	0.11	0.179	2.94127e-14		Sipa1l1	0.00625438	0.0864526	0.179	0.168	1		Pdcd5	3.4778e-99	0.136169	0.876	0.508	5.53526e-95
Jkamp	4.6054e-36	0.155019	0.129	0.238	7.32995e-32		Pcna	4.60236e-07	0.0863949	0.407	0.375	0.00732511		Tm2d2	0	0.136157	0.482	0.114	0
Ttc17	0.180936	0.154963	0.071	0.082	1		Gm7334	1.36308e-77	0.0863162	0.041	0.003	2.16948e-73		Rab11b	5.58605e-283	0.136087	0.713	0.278	8.89076e-279
Cic	5.77172e-24	0.154889	0.104	0.181	9.18627e-20		Katnbl1	0.147542	0.0860479	0.138	0.16	1		Atraid	0	0.136058	0.53	0.14	0
Zfp512b	0.111986	0.154861	0.069	0.08	1		Taf7	0.549807	0.0859025	0.273	0.299	1		Spata24	0	0.135933	0.204	0.015	0
Pcca	5.07953e-08	0.154659	0.087	0.124	0.000808458		2410004B18Rik	0.922843	0.0858457	0.241	0.273	1		Ccdc167	0	0.135858	0.228	0.022	0
Ik	3.82617e-38	0.154656	0.291	0.517	6.08973e-34		Mapk8	5.55943e-09	0.0857699	0.106	0.079	8.84839e-05		Nap1l4	1.68524e-158	0.135748	0.819	0.406	2.68223e-154
Chdh	7.41849e-34	0.154602	0.059	0.023	1.18073e-29		Dph3	0.847292	0.0856934	0.447	0.519	1		Mrpl49	0	0.135615	0.437	0.111	0
Tmem234	0.268127	0.154592	0.515	0.711	1		Mier2	5.84751e-08	0.0856854	0.066	0.047	0.00093069		Gpr146	0	0.135609	0.177	0.013	0
Rps6ka1	5.04593e-46	0.154541	0.233	0.429	8.0311e-42		Banp	0.225941	0.0855986	0.13	0.13	1		Mthfd2	1.94509e-252	0.135604	0.622	0.244	3.0958e-248
Saysd1	7.50162e-27	0.154453	0.166	0.28	1.19396e-22		Prkrip1	0.227234	0.0854789	0.19	0.223	1		Pin4	0	0.135247	0.611	0.205	0
Ap3m2	0.184128	0.154453	0.066	0.076	1		Zcchc7	0.0177489	0.0853574	0.424	0.455	1		Ormdl2	0	0.13515	0.579	0.192	0
Siah1a	0.0588789	0.15429	0.081	0.097	1		Sarnp	0.0336193	0.0852382	0.499	0.547	1		Pex16	0	0.134712	0.383	0.089	0
Adrb2	0.822647	0.154257	0.075	0.079	1		Il15ra	0.00134206	0.0851902	0.101	0.089	1		Stard10	0	0.13448	0.266	0.044	0
Ikzf5	1.02554e-12	0.154252	0.089	0.138	1.63225e-08		Zfp770	2.15857e-08	0.0849721	0.096	0.072	0.000343558		G2e3	1.49667e-304	0.134269	0.264	0.05	2.3821e-300
Kat2b	0.00236902	0.154184	0.065	0.083	1		Ythdc1	0.690609	0.0848718	0.429	0.491	1		Ccz1	0	0.134096	0.557	0.176	0
Nsf	4.60807e-37	0.153815	0.145	0.264	7.3342e-33		Dnajc5	0.455068	0.0847773	0.337	0.397	1		Gmds	0	0.13404	0.343	0.067	0
St7l	1.99467e-10	0.153638	0.088	0.131	3.17471e-06		Mosmo	0.0143602	0.0845886	0.206	0.203	1		Mx1	7.89154e-249	0.134034	0.139	0.01	1.25602e-244
Sos2	1.05572e-08	0.153637	0.097	0.139	0.000168028		Atp8b4	0.246697	0.0843393	0.188	0.213	1		Pank2	0	0.13392	0.479	0.127	0
Pds5a	3.74792e-37	0.153608	0.264	0.465	5.96519e-33		Pcnx	1.87437e-13	0.0841774	0.096	0.063	2.98325e-09		Hist1h2bb	0	0.133725	0.147	0.001	0
2900097C17Rik	2.10948e-23	0.153582	0.178	0.289	3.35745e-19		Dtwd1	0.0230463	0.0839782	0.082	0.075	1		Hmgcs1	8.75221e-272	0.133283	0.321	0.085	1.393e-267
Eif3e	2.48429e-11	0.153518	0.789	0.942	3.954e-07		Phf23	0.270689	0.0839124	0.209	0.242	1		Ncbp3	0	0.132915	0.491	0.131	0
0610012G03Rik	6.45303e-33	0.153448	0.304	0.533	1.02706e-28		Uba3	0.62839	0.0839119	0.174	0.194	1		Gmpr2	0	0.132695	0.327	0.066	0
Mapk9	1.06132e-18	0.153379	0.096	0.159	1.68919e-14		Rapgef1	0.149846	0.0837428	0.201	0.234	1		Pepd	2.2989e-285	0.132677	0.456	0.147	3.65894e-281
Tcaim	0.143989	0.153281	0.056	0.053	1		Dhx30	0.338475	0.0837298	0.213	0.223	1		Plekhb2	0	0.132657	0.371	0.089	0
C1qtnf4	1.14638e-10	0.153265	0.054	0.035	1.82458e-06		Nhlrc1	6.22168e-62	0.0835343	0.039	0.005	9.90242e-58		Ppp2r1a	0	0.132333	0.612	0.205	0
Snx17	1.5993e-44	0.153207	0.259	0.477	2.54544e-40		Usp37	0.0490854	0.0834668	0.163	0.193	1		Aldh7a1	0	0.132294	0.197	0.016	0
Pts	3.79802e-39	0.153151	0.248	0.441	6.04492e-35		Tlnrd1	0.00869486	0.0830914	0.112	0.138	1		Mrpl36	1.5697e-215	0.132156	0.737	0.32	2.49833e-211
Ppp1r11	4.5136e-05	0.15314	0.5	0.769	0.718384		Hnrnpd	4.38594e-07	0.082918	0.826	0.769	0.00698066		Nudt22	0	0.132153	0.287	0.049	0
Actr3	5.18439e-18	0.153125	0.901	0.893	8.25148e-14		Btbd9	0.0494973	0.0827626	0.176	0.173	1		Vapb	0	0.132089	0.484	0.138	0
Axin1	2.36419e-44	0.153112	0.15	0.285	3.76284e-40		Ccl9	7.06087e-07	0.0824336	0.003	0	0.0112381		Saal1	0	0.132046	0.292	0.044	0
Rcor3	0.609438	0.153029	0.064	0.07	1		AY036118	3.14969e-28	0.0823086	0.939	0.95	5.01305e-24		Rps11	2.58145e-102	0.132023	1	0.999	4.10863e-98
Rps5	6.44415e-91	0.153002	1	0.999	1.02565e-86		Lgals7	1.26897e-12	0.0822191	0.038	0.019	2.01969e-08		Trp53i11	0	0.131986	0.35	0.068	0
Zfp362	3.28854e-10	0.152974	0.074	0.112	5.23404e-06		Dbr1	0.0433787	0.0821895	0.163	0.195	1		Scaf1	0	0.131791	0.33	0.065	0
Rab11fip2	3.13833e-20	0.152845	0.096	0.162	4.99496e-16		Qsox2	2.29507e-14	0.0821836	0.059	0.033	3.65283e-10		Sp3os	0	0.131737	0.283	0.052	0
S1pr2	0.714569	0.15257	0.068	0.07	1		Ywhaq	0.0282358	0.0821223	0.688	0.688	1		Gm8186	0	0.131458	0.414	0.11	0
Gdi1	6.66734e-16	0.152432	0.098	0.156	1.06117e-11		Scarb1	0.0158524	0.0821174	0.055	0.048	1		Cenpu	0	0.131318	0.175	0.005	0
Sfi1	0.0664515	0.152409	0.063	0.074	1		Mad2l2	0.000456577	0.0820463	0.135	0.174	1		Dna2	0	0.131203	0.161	0.002	0
1110038F14Rik	1.89848e-53	0.15235	0.22	0.419	3.02161e-49		Ttll4	4.78503e-14	0.0820387	0.061	0.035	7.61585e-10		Nup107	0	0.131153	0.321	0.066	0
Hsd17b4	1.76451e-30	0.152341	0.13	0.232	2.80839e-26		Plekha1	1.56619e-05	0.082018	0.116	0.096	0.249275		Chek2	0	0.131113	0.179	0.008	0
Ei24	1.78616e-47	0.152231	0.182	0.344	2.84285e-43		Igf1r	3.22823e-55	0.0819849	0.041	0.007	5.13805e-51		Plekhg2	0	0.130931	0.304	0.057	0
Ipo11	9.08873e-20	0.152159	0.101	0.169	1.44656e-15		Utp14b	1.83127e-17	0.0819748	0.049	0.024	2.91465e-13		Hcfc1r1	0	0.130717	0.417	0.099	0
Ids	1.46311e-13	0.152143	0.049	0.028	2.32868e-09		Atp10a	0.95195	0.0818541	0.091	0.096	1		1110004F10Rik	1.10064e-161	0.130701	0.802	0.394	1.75178e-157
Fez2	2.90542e-08	0.152087	0.081	0.118	0.000462427		Sema4b	0.956593	0.0814332	0.084	0.088	1		Phf14	0	0.130643	0.682	0.236	0
Slc25a30	0.0049726	0.152055	0.066	0.084	1		Fbxw11	0.234043	0.0813478	0.104	0.103	1		Mus81	0	0.130565	0.326	0.064	0
Tef	1.26549e-10	0.151941	0.057	0.037	2.01416e-06		Thap4	0.023159	0.0811201	0.087	0.08	1		Cul4b	0	0.13044	0.329	0.069	0
Rps3	9.75596e-102	0.151801	0.999	0.999	1.55276e-97		Ap1s3	0.12075	0.0809483	0.104	0.122	1		Rap1gap2	0	0.130328	0.161	0.006	0
Ssh1	1.74045e-26	0.151739	0.104	0.185	2.77009e-22		Zfp62	0.0256277	0.0804624	0.214	0.256	1		Traf7	0	0.130308	0.426	0.104	0
Med15	1.71758e-32	0.151701	0.159	0.279	2.73369e-28		Sec61a2	1.11992e-07	0.08032	0.079	0.058	0.00178246		Gm10282	0	0.130256	0.174	0.008	0
Arl8b	1.04296e-38	0.15165	0.138	0.256	1.65998e-34		Emc7	0.205204	0.0800603	0.454	0.517	1		Sytl2	0	0.129915	0.443	0.115	0
Alkbh2	1.86034e-11	0.151614	0.1	0.15	2.96091e-07		Camk2n1	1.13869e-44	0.0800044	0.037	0.007	1.81233e-40		Cpsf2	6.96238e-306	0.129671	0.512	0.168	1.10813e-301
Cdk11b	8.53167e-38	0.151431	0.3	0.531	1.3579e-33		Zfp326	0.0873792	0.0799507	0.22	0.261	1		Med11	0	0.129455	0.397	0.102	0
Pak6	0.100983	0.151192	0.058	0.068	1		Eif3j2	2.47355e-17	0.0797552	0.048	0.023	3.9369e-13		Gins1	0	0.12943	0.166	0.004	0
Gm11707	1.27139e-20	0.151191	0.052	0.026	2.02355e-16		Rpgrip1	0.00270623	0.0797442	0.171	0.212	1		Msh6	6.17665e-305	0.129321	0.261	0.049	9.83075e-301
Lmbrd1	1.57441e-19	0.151039	0.133	0.213	2.50583e-15		Rsad1	6.52858e-29	0.0797302	0.05	0.019	1.03909e-24		Gtf2a2	1.99022e-207	0.129312	0.761	0.336	3.16764e-203
Ppp1r10	1.93558e-45	0.151031	0.233	0.424	3.08068e-41		Rbm18	0.535366	0.0797012	0.192	0.205	1		Recql	0	0.129204	0.325	0.059	0
Plekhf1	0.868996	0.150985	0.056	0.06	1		Enox1	8.47516e-85	0.0796568	0.033	0.001	1.34891e-80		Mpg	0	0.12911	0.365	0.082	0
Cysltr2	0.00377439	0.150894	0.137	0.17	1		Coq4	1.32936e-05	0.0795015	0.065	0.049	0.21158		Hcfc1	0	0.129017	0.526	0.165	0
Cep120	0.000106144	0.15075	0.069	0.092	1		Ppm1a	0.736638	0.0794247	0.29	0.331	1		Fam76a	0	0.129006	0.359	0.071	0
Nlrc5	1.65789e-25	0.150667	0.133	0.226	2.63869e-21		Rap1a	0.00768405	0.0794039	0.789	0.782	1		Pkmyt1	0	0.129003	0.217	0.02	0
Dtx4	2.04705e-45	0.150579	0.043	0.01	3.25808e-41		Pvr	3.86859e-06	0.0792809	0.116	0.093	0.0615725		Lamp1	8.13005e-267	0.128848	0.678	0.267	1.29398e-262
Scfd1	5.28457e-46	0.150521	0.246	0.451	8.41093e-42		Sap18	0.143167	0.0792261	0.517	0.565	1		Tapbpl	0	0.128847	0.669	0.231	0
Rbm33	5.97329e-40	0.150492	0.177	0.321	9.50709e-36		Rgs2	2.58798e-12	0.0791511	0.143	0.101	4.11902e-08		Zwilch	0	0.128837	0.165	0.003	0
Mfsd14b	1.04571e-14	0.15048	0.085	0.137	1.66436e-10		Egln3	0.000100575	0.0789734	0.045	0.033	1		Rnf144a	0	0.128744	0.303	0.059	0
Mfhas1	2.45433e-06	0.15031	0.083	0.114	0.0390631		Gstcd	0.0489579	0.078952	0.07	0.064	1		Nub1	0	0.128744	0.569	0.18	0
Selenok	8.82162e-06	0.150183	0.666	0.852	0.140405		Hectd1	0.0992135	0.0788514	0.648	0.727	1		Ubac1	0	0.128693	0.348	0.071	0
Cfap36	3.2727e-34	0.149956	0.127	0.232	5.20883e-30		Lipt2	7.37066e-38	0.0786845	0.041	0.011	1.17311e-33		Fdxr	0	0.128573	0.39	0.092	0
Golga4	1.6643e-30	0.149912	0.24	0.4	2.6489e-26		Mex3d	8.0566e-18	0.0785108	0.059	0.03	1.28229e-13		H2-T23	3.36812e-76	0.128478	0.973	0.69	5.3607e-72
Nck1	6.91543e-46	0.149869	0.204	0.377	1.10066e-41		Wars	0.0131086	0.0784095	0.19	0.234	1		St3gal1	0	0.128363	0.271	0.049	0
Tmem55b	1.5258e-33	0.149824	0.127	0.232	2.42847e-29		Gtf2h2	0.0891811	0.0782066	0.132	0.156	1		Sucla2	0	0.1281	0.501	0.145	0
Xpo7	1.43381e-27	0.149818	0.12	0.21	2.28205e-23		Adarb1	4.24072e-27	0.078138	0.038	0.012	6.74953e-23		9530036M11Rik	6.9769e-217	0.12809	0.124	0.009	1.11044e-212
Insr	4.32683e-10	0.149716	0.051	0.033	6.88658e-06		Rbm12	0.106775	0.0779474	0.122	0.119	1		Pradc1	0	0.127739	0.286	0.048	0
Dvl2	0.00270083	0.149698	0.064	0.082	1		Chst2	0.00032088	0.0778541	0.278	0.348	1		Nfatc3	0	0.127692	0.681	0.242	0
Smarcc2	1.069e-50	0.149505	0.169	0.327	1.70142e-46		Ppp4r3a	0.867764	0.0777649	0.373	0.425	1		Morf4l1	1.59402e-97	0.127445	0.956	0.648	2.53705e-93
Tmem63a	0.0791807	0.149182	0.064	0.076	1		Bid	0.498156	0.0777119	0.108	0.12	1		Kntc1	0	0.127259	0.156	0	0
Cln5	2.67358e-16	0.148935	0.091	0.148	4.25527e-12		Cdh23	5.96861e-48	0.0775539	0.037	0.006	9.49964e-44		Tango2	0	0.127244	0.319	0.056	0
Slc25a53	0.350155	0.148741	0.062	0.062	1		Slc23a2	5.26637e-05	0.0774819	0.081	0.065	0.838196		Paip2	4.38318e-130	0.127069	0.924	0.509	6.97627e-126
Ube2q1	3.90695e-44	0.14874	0.276	0.503	6.21831e-40		Acer3	4.2292e-09	0.0774753	0.056	0.036	6.73119e-05		Cmpk2	9.56844e-285	0.12701	0.141	0.005	1.52291e-280
Slc37a3	2.82569e-07	0.148645	0.083	0.117	0.00449737		Atrip	0.131752	0.0773451	0.088	0.102	1		Ttc32	0	0.126798	0.388	0.088	0
Tmem123	7.26566e-36	0.148575	0.169	0.3	1.1564e-31		Gramd4	0.0732471	0.0772913	0.088	0.083	1		Ube2a	6.42722e-179	0.126703	0.783	0.366	1.02296e-174
Vars	2.84683e-18	0.148399	0.327	0.521	4.53102e-14		Nepro	1.00846e-07	0.0772546	0.061	0.042	0.00160506		Aldh9a1	0	0.126523	0.372	0.089	0
Efnb1	8.66334e-22	0.148329	0.037	0.015	1.37886e-17		Adamts6	1.42045e-26	0.0770901	0.053	0.021	2.26079e-22		Col4a3bp	0	0.126374	0.387	0.095	0
H2-Q10	6.48676e-11	0.148183	0.094	0.14	1.03243e-06		Slc52a2	0.681046	0.0769877	0.12	0.126	1		Sema4d	0	0.126351	0.59	0.196	0
Lrrcc1	7.05043e-43	0.148159	0.117	0.229	1.12215e-38		Mul1	0.6594	0.0769692	0.123	0.135	1		Sms	7.79181e-146	0.126344	0.792	0.405	1.24014e-141
Mvp	5.62309e-35	0.148158	0.14	0.254	8.94971e-31		Usp7	0.962074	0.0768305	0.378	0.436	1		Rps6ka1	0	0.126311	0.599	0.203	0
Cyp4f16	3.90544e-34	0.148128	0.045	0.015	6.21591e-30		Socs7	0.00130413	0.0767916	0.076	0.064	1		Eml3	0	0.126283	0.255	0.04	0
Nudt3	4.10459e-30	0.147965	0.164	0.283	6.53286e-26		Aggf1	0.743827	0.0767238	0.339	0.394	1		Eef1akmt2	0	0.126217	0.372	0.085	0
Ric1	7.93501e-16	0.147927	0.094	0.15	1.26294e-11		Uchl3	0.00263088	0.0766795	0.382	0.472	1		Chfr	0	0.126213	0.551	0.164	0
Ccny	3.81063e-24	0.147908	0.144	0.24	6.06499e-20		Xxylt1	1.7684e-06	0.0765517	0.077	0.058	0.0281459		Leprot	0	0.12609	0.406	0.09	0
Pskh1	0.377388	0.14788	0.063	0.071	1		Rpl10-ps3	0.253559	0.0765495	0.241	0.254	1		Qrsl1	0	0.126087	0.292	0.049	0
Kdm4c	3.03833e-10	0.14774	0.086	0.128	4.8358e-06		Taf1c	0.0104102	0.0764522	0.077	0.069	1		Ttf2	0	0.126066	0.283	0.044	0
Rrnad1	2.77242e-13	0.147683	0.086	0.135	4.41258e-09		Szrd1	0.0458471	0.0764256	0.292	0.36	1		Hmg20b	0	0.125752	0.43	0.108	0
Braf	2.34154e-07	0.147463	0.079	0.112	0.00372679		Cabin1	0.0944678	0.0764179	0.279	0.334	1		E2f7	0	0.125655	0.144	0	0
D830025C05Rik	1.07118e-11	0.147364	0.049	0.029	1.70489e-07		Casc3	0.0452067	0.0763813	0.184	0.22	1		Svbp	0	0.125648	0.665	0.232	0
Etfbkmt	0.00292126	0.147317	0.057	0.049	1		Afg3l2	0.139924	0.0761183	0.171	0.199	1		Sfr1	4.76592e-99	0.125543	0.871	0.512	7.58544e-95
Ythdc1	2.4921e-31	0.147151	0.326	0.557	3.96643e-27		1600020E01Rik	0.0405252	0.0760996	0.086	0.079	1		Stard4	0	0.125439	0.29	0.05	0
Paip2b	1.56649e-13	0.147119	0.108	0.166	2.49323e-09		Kcnk5	4.14342e-08	0.0760234	0.1	0.143	0.000659466		Inpp1	0	0.125344	0.52	0.143	0
Tmed4	2.78499e-22	0.147105	0.099	0.17	4.43259e-18		Ciart	1.14991e-51	0.0760178	0.042	0.008	1.83019e-47		Sept9	3.01608e-256	0.12506	0.81	0.336	4.80039e-252
Lancl1	3.49305e-06	0.146936	0.074	0.102	0.0555954		Myo9a	1.65373e-09	0.075999	0.053	0.034	2.63208e-05		Cops2	0	0.125042	0.516	0.164	0
Rpl3	1.86676e-71	0.146918	0.998	0.998	2.97114e-67		Zfp296	2.45759e-15	0.0759748	0.038	0.018	3.9115e-11		Tbc1d10b	0	0.124967	0.409	0.098	0
Ubqln2	2.31141e-08	0.146869	0.081	0.118	0.000367885		Smad5	2.03647e-05	0.07597	0.089	0.071	0.324125		Flad1	0	0.124567	0.303	0.06	0
Btbd9	7.12137e-15	0.146601	0.129	0.198	1.13344e-10		Derl1	0.681691	0.0757081	0.412	0.476	1		Slc35b1	0	0.124464	0.497	0.156	0
Cep44	9.04686e-24	0.146508	0.091	0.16	1.4399e-19		Tbca	4.94209e-08	0.0756623	0.742	0.767	0.000786584		Gm13012	6.49725e-279	0.124328	0.215	0.034	1.0341e-274
Ankrd16	2.72208e-20	0.146384	0.091	0.154	4.33247e-16		Slc25a20	0.625579	0.0756372	0.137	0.143	1		Dhx16	0	0.124255	0.363	0.082	0
Fpgt	0.00336752	0.146359	0.056	0.048	1		mt-Nd2	1.78624e-36	0.0756143	0.999	0.999	2.84298e-32		Gpaa1	0	0.1242	0.297	0.049	0
Helz2	1.47826e-08	0.146344	0.096	0.137	0.00023528		Gm26699	0.571116	0.07552	0.204	0.217	1		Haus5	0	0.124105	0.218	0.019	0
Pde11a	2.3933e-16	0.146332	0.048	0.025	3.80918e-12		Slc25a15	8.36191e-23	0.0753552	0.047	0.019	1.33088e-18		Vcpkmt	0	0.124003	0.307	0.061	0
Ppwd1	3.31509e-38	0.146216	0.106	0.205	5.2763e-34		Cd2ap	0.972608	0.0751566	0.145	0.155	1		Dock8	0	0.123783	0.649	0.218	0
Ifi27	4.16767e-10	0.146181	0.423	0.637	6.63326e-06		D730045B01Rik	3.86674e-40	0.0748316	0.036	0.008	6.1543e-36		Itpk1	0	0.123698	0.379	0.093	0
Cipc	0.426186	0.14609	0.059	0.059	1		Vmp1	0.412315	0.074749	0.44	0.51	1		Arhgap9	2.67249e-272	0.123601	0.873	0.36	4.25354e-268
Cdon	0.613286	0.146085	0.068	0.075	1		Gm20707	4.13929e-07	0.0747316	0.061	0.043	0.0065881		Jak3	0	0.123568	0.31	0.062	0
Fbxo3	3.57185e-31	0.146001	0.118	0.214	5.68496e-27		Ccdc58	0.010926	0.0744376	0.161	0.197	1		Ftl1	4.63645e-69	0.123548	0.999	0.946	7.37937e-65
Irak1	6.57877e-42	0.145887	0.155	0.289	1.04708e-37		Ddb1	0.137232	0.074403	0.321	0.385	1		Mbd4	0	0.123506	0.201	0.017	0
Ctdsp1	1.15991e-47	0.145868	0.134	0.263	1.84611e-43		Prpf3	0.0767817	0.0743985	0.14	0.165	1		Ap3s2	0	0.123448	0.267	0.045	0
Lcorl	5.35967e-08	0.145834	0.1	0.14	0.000853045		Gm10036	0.00397567	0.0743206	0.168	0.157	1		Cdc7	0	0.123292	0.223	0.023	0
Higd2a	9.2897e-24	0.145821	0.341	0.57	1.47855e-19		Pdzd8	0.402903	0.0742617	0.294	0.319	1		Dnase1l3	6.72016e-259	0.123151	0.113	0	1.06958e-254
Alkbh4	4.05017e-18	0.145689	0.078	0.133	6.44625e-14		Fitm2	1.49369e-17	0.0742561	0.042	0.019	2.37736e-13		Pgls	9.48968e-139	0.123093	0.851	0.44	1.51038e-134
Poldip3	3.90633e-50	0.145644	0.187	0.356	6.21732e-46		Psma6	0.0203032	0.0740781	0.649	0.662	1		Stx8	0	0.122931	0.602	0.197	0
Rcn2	9.6881e-33	0.145557	0.143	0.254	1.54196e-28		Ifitm1	0.639843	0.0740443	0.002	0.001	1		1700025G04Rik	0	0.122883	0.243	0.04	0
Polr3f	7.08745e-21	0.145538	0.104	0.175	1.12804e-16		Ctdp1	0.758319	0.0740356	0.101	0.105	1		Smu1	1.07596e-220	0.122825	0.692	0.289	1.71249e-216
Dip2b	2.51252e-17	0.145537	0.105	0.169	3.99892e-13		Cdip1	1.72821e-05	0.0739588	0.102	0.083	0.275063		Kctd20	0	0.122697	0.337	0.066	0
Cetn3	7.22702e-20	0.145527	0.37	0.61	1.15025e-15		Tagap1	1.0321e-10	0.0738731	0.054	0.033	1.6427e-06		Rgs14	0	0.1223	0.392	0.087	0
Mdp1	6.20282e-35	0.145517	0.297	0.52	9.87241e-31		Slc25a36	0.0503432	0.0737125	0.197	0.194	1		Fuca2	0	0.122128	0.355	0.077	0
Cop1	1.02067e-34	0.14535	0.155	0.275	1.62449e-30		Emc8	0.016371	0.073677	0.299	0.373	1		Flt3l	0	0.121968	0.43	0.101	0
Gpn3	8.10208e-55	0.145335	0.144	0.292	1.28953e-50		Kansl3	0.961542	0.0734956	0.164	0.177	1		Cd200	2.92002e-204	0.121905	0.143	0.019	4.6475e-200
Tbc1d20	1.4288e-37	0.145317	0.124	0.233	2.27408e-33		Mrrf	0.165568	0.0733911	0.105	0.121	1		Alkbh3	0	0.12189	0.345	0.072	0
Espn	1.02356e-10	0.14509	0.099	0.147	1.6291e-06		Btg2	3.87368e-08	0.0733716	0.599	0.747	0.000616534		Dok1	0	0.121843	0.381	0.088	0
2300009A05Rik	1.05803e-38	0.145085	0.164	0.298	1.68396e-34		Tm2d1	0.685854	0.0733034	0.255	0.288	1		Arl6ip6	0	0.121815	0.351	0.083	0
Arhgap12	2.93591e-06	0.145003	0.073	0.102	0.0467279		Igkc	0.00011251	0.0732655	0.019	0.011	1		Gin1	0	0.121755	0.382	0.085	0
Kbtbd11	6.78051e-42	0.14491	0.251	0.446	1.07919e-37		Atmin	0.00585968	0.073151	0.1	0.089	1		Isoc2b	0	0.121731	0.26	0.044	0
Acox3	0.000198244	0.144857	0.067	0.089	1		Mapre1	0.0146941	0.0731333	0.619	0.637	1		Tmem222	0	0.121628	0.425	0.11	0
Slc35c2	6.43814e-37	0.144856	0.132	0.244	1.02469e-32		Plagl1	3.42475e-49	0.0729604	0.019	0	5.45083e-45		Yif1a	0	0.121616	0.452	0.122	0
Nfic	2.06369e-24	0.144763	0.094	0.166	3.28457e-20		Ppp2r3a	1.00941e-43	0.0729084	0.037	0.007	1.60658e-39		Chst12	0	0.121533	0.217	0.025	0
Epc2	1.31912e-39	0.144739	0.128	0.241	2.09951e-35		Rab3gap1	0.357848	0.0728062	0.273	0.316	1		Denr	2.0531e-195	0.1215	0.761	0.342	3.26771e-191
Zdhhc17	0.622715	0.144605	0.079	0.086	1		Prdm15	2.00728e-08	0.0727886	0.068	0.047	0.000319478		Ap1s2	0	0.121498	0.292	0.058	0
Dpy19l3	0.00637707	0.144551	0.079	0.099	1		Cobll1	0.0913419	0.0727695	0.056	0.051	1		2010111I01Rik	4.51204e-212	0.121331	0.734	0.323	7.18136e-208
Scai	0.000253828	0.144514	0.079	0.103	1		Nfx1	0.0447768	0.0725699	0.233	0.278	1		Pif1	2.66914e-300	0.120951	0.131	0	4.2482e-296
Thap11	1.99037e-38	0.144452	0.122	0.231	3.16787e-34		Ccdc85c	1.79334e-34	0.072552	0.028	0.006	2.85429e-30		Gpatch11	0	0.120892	0.469	0.126	0
Myh9	0.0129311	0.144397	0.491	0.663	1		Fem1a	0.295863	0.0724608	0.118	0.118	1		Gid8	0	0.120685	0.442	0.118	0
Insig2	8.69774e-26	0.144216	0.101	0.178	1.38433e-21		Khsrp	0.00185238	0.0722984	0.237	0.298	1		Uxt	0	0.120656	0.389	0.098	0
BC029722	5.95776e-27	0.144199	0.105	0.187	9.48237e-23		2810403A07Rik	0.633001	0.0719546	0.215	0.229	1		Tmco4	0	0.120593	0.291	0.051	0
Ntrk3	1.22581e-09	0.143859	0.082	0.121	1.95101e-05		Mcur1	0.285488	0.0719014	0.176	0.182	1		Agap2	0	0.120507	0.254	0.041	0
[truncated: 13,918 more rows]
