# Supplementary material for: Longitudinal analysis of invariant natural killer T cell activation reveals a cMAF-associated transcriptional state of NKT10 cells
Source: eLife. 2022 Dec 2;11:e76586. doi: 10.7554/eLife.76586 (PMC9831610; doi:10.7554/eLife.76586)
Supplement: Supplementary file 2. [file elife-76586-supp2.xlsx]

## Sheet: Sheet1
iNKT Cell Activation	Cytokine Production	Glycolysis	Amino Acid Uptake and Metabolism	Polyamine Synthesis	Oxidative Metabolism	Fatty acid beta oxidation	Fatty acid biosynthesis	NKTFH Gene Score
Nr4a1	Ifng	Pkm	Slc1a5	Odc1	Acly	Abcd1	Abcd1	Cxcr5
Il2ra	Il2	Pgk1	Slc7a5	Srm	Aco1	Abcd2	Abcd2	Pdcd1
Il2	Il4	Hk1	Slc3a2	Sms	Aco2	Abcd3	Abcd3	Maf
Cd69	Il13	Hk2	Slc7a1	Amd1	Cs	Abcd4	Abhd2	Tox2
	Il17a	Ldha	Slc38a1		Dlat	Acaa1a	Acaca	Tox
	Csf2	Gapdh	Gls		Pdha1	Acaa2	Acacb	Il21r
	Tnf	Eno1	Glud1		Pdhb	Acadm	Acly	Btla
	Il10	Pgam1	Got1		Dlst	Acadvl	Acot7	Cxcr4
	Il21	Pfkp	Got2		Idh2	Acat1	Acsbg1	Cd40lg
		Pfkl			Idh3a	Acat2	Acsf3	Stat3
		Slc2a1			Idh3b	Acat3	Acsl3	Bcl6
		Slc16a1			Idh3g	Acox1	Acss1	Icos
		Pgm1			Mdh1	Acox3	Acss2	Cd4
		Pgm2			Mdh2	Acoxl	Alox8	Il6ra
		Tpi1			Ogdh	Auh	Anxa1	Slamf1
					Sdha	Bdh2	Asah2	Il21
					Sdhb	Cpt2	Brca1	Il4
					Sdhc	Crot	Cbr4	Tnfrsf4
					Sdhd	Decr1	Cd74	Slamf6
					Sucla2	Echdc1	Decr2
					Suclg1	Echdc2	Degs1
					Suclg2	Echs1	Eif6
					Cox10	Eci1	Elovl1
					Cox11	Eci2	Elovl4
					Cox15	Ehhadh	Elovl5
					Cyc1	Hadh	Elovl6
					mt-Atp6	Hadha	Elovl7
					mt-Atp8	Hadhb	Fabp5
					mt-Co1	Hsd17b4	Fads1
					mt-Co2	Hsd17b10	Fads2
					mt-Co3	Pex2	Fads6
					mt-Nd1	Pex5	Fasn
					mt-Nd2	Pex7	Gstm4
					mt-Nd3	Scp2	H2-Ke6
					mt-Nd4	Sesn2	Hacd1
					mt-Nd5	Slc25a17	Hacd2
					mt-Nd6	Slc27a2	Hacd3
					Ndufa1	Tuba8	Hacd4
					Ndufa10	Acad11	Hpgds
					Ndufa11	Acadl	Il1b
					Ndufa2	Acads	Lias
					Ndufa3	Etfa	Lipc
					Ndufa4	Etfb	Lipg
					Ndufa5	Etfdh	Liph
					Ndufa6	Gcdh	Lpgat1
					Ndufa7	Ivd	Lpl
					Ndufa8	Crat	Ltc4s
					Ndufa9	Acsl5	Mapk9
					Ndufab1	Akt2	Mcat
					Ndufb10	Cpt1a	Mecr
					Ndufb2	Irs2	Mgll
					Ndufb3	Twist1	Mid1ip1
					Ndufb4	Lonp2	Mlxipl
					Ndufb5	Mlycd	Mlycd
					Ndufb6	Mtor	Myo5a
					Ndufb7	Tysnd1	Ndufab1
					Ndufb8		Nr1h2
					Ndufb9		Nr1h3
					Ndufc1		Oxsm
					Ndufc2		Pecr
					Ndufs1		Pla2g3
					Ndufs2		Pla2g4a
					Ndufs3		Plp1
					Ndufs4		Prkaa1
					Ndufs5		Prkab1
					Ndufs6		Prkag1
					Ndufs7		Prkag2
					Ndufs8		Ptges
					Ndufv1		Ptges2
					Ndufv2		Ptges3
					Ndufv3		Ptgs1
					Ppa1		Ptgs2
					Ppa2		Qk
					Sdha		Scap
					Sdhb		Scd1
					Sdhc		Scd2
					Sdhd		Scd4
					Tcirg1		Srebf1
					Uqcr10		Tbxas1
					Uqcr11		Tecr
					Uqcrb
					Uqcrc1
					Uqcrc2
					Uqcrfs1
					Uqcrh
					Uqcrq
