# Supplementary material for: Longitudinal analysis of invariant natural killer T cell activation reveals a cMAF-associated transcriptional state of NKT10 cells
Source: eLife. 2022 Dec 2;11:e76586. doi: 10.7554/eLife.76586 (PMC9831610; doi:10.7554/eLife.76586)
Supplement: Supplementary file 3. [file elife-76586-supp3.xlsx]

## Sheet: Sheet1
Activated NKT1 cells							Activated NKT2 cells							Activated NKT17 cells							Steady State NKT1 cells							Steady State NKT2 cells							Steady State NKT17 cells
Gene	P_Value	Log2(Fold Change)	pct.1	pct.2	Adjusted_P_Value		Gene	P_Value	Log2(Fold Change)	pct.1	pct.2	Adjusted_P_Value		Gene	P_Value	Log2(Fold Change)	pct.1	pct.2	Adjusted_P_Value		Gene	P_Value	Log2(Fold Change)	pct.1	pct.2	Adjusted_P_Value		Gene	P_Value	Log2(Fold Change)	pct.1	pct.2	Adjusted_P_Value		Gene	P_Value	Log2(Fold Change)	pct.1	pct.2	Adjusted_P_Value
Ccl4	0	4.65781	0.827	0.453	0		Lif	0	1.32698	0.634	0.036	0		Il17a	0	3.73373	0.483	0.006	0		AW112010	0	1.39523	0.994	0.618	0		Igfbp4	0	0.750725	0.284	0.007	0		Serpinb1a	0	1.07111	0.505	0.011	0
Ifng	0	4.45696	0.986	0.542	0		Cd200	6.14395e-175	0.541288	0.237	0.012	1.90788e-170		Il17f	0	2.45245	0.236	0.001	0		Mbnl1	0	1.29115	0.974	0.678	0		Ccr7	0	0.473614	0.226	0.005	0		Il17re	0	0.514559	0.284	0.004	0
Ccl3	0	3.61696	0.45	0.079	0		Lta	1.68799e-115	1.41887	0.742	0.218	5.2417e-111		Il23r	2.20592e-296	0.508887	0.348	0.005	6.85005e-292		Klrb1c	0	1.11407	0.533	0.097	0		Il6ra	1.07995e-294	0.503393	0.263	0.013	3.35358e-290		Lingo4	0	0.407934	0.229	0.002	0
Ccl1	0	3.52881	0.366	0.068	0		Cd274	1.11223e-113	0.667707	0.505	0.094	3.45382e-109		Cxcl9	4.70036e-191	1.71284	0.315	0.007	1.4596e-186		Ccl5	0	1.10275	0.956	0.719	0		Emp3	9.31513e-293	1.07976	0.736	0.162	2.89263e-288		Fam83a	0	0.40287	0.202	0.001	0
Il4	0	3.52698	0.91	0.428	0		Tagap	3.48659e-101	0.8871	0.912	0.341	1.08269e-96		Pxdc1	9.02947e-153	1.56832	0.854	0.082	2.80392e-148		Txnip	0	1.09884	0.633	0.131	0		Slamf6	5.32548e-275	1.02675	0.73	0.175	1.65372e-270		Lrrc25	2.51564e-273	0.335691	0.165	0.001	7.81183e-269
Il2	0	3.14661	0.491	0.14	0		Hivep3	2.77808e-86	0.886811	0.505	0.126	8.62677e-82		Lif	1.47754e-142	1.42028	0.652	0.048	4.5882e-138		Gimap7	0	1.08331	0.735	0.288	0		Klf2	4.18524e-267	1.1218	0.631	0.126	1.29964e-262		Rorc	1.04026e-263	0.598205	0.317	0.01	3.23033e-259
Xcl1	0	2.8496	0.936	0.559	0		Rilpl2	2.3918e-83	0.927405	0.831	0.35	7.42725e-79		Lgals3	3.17409e-142	1.52998	0.607	0.041	9.85651e-138		Gm26740	0	1.02525	0.709	0.216	0		Ddit4	5.07205e-235	0.759252	0.513	0.088	1.57502e-230		S100a4	3.79626e-257	1.86513	0.766	0.089	1.17885e-252
Il13	0	2.62531	0.708	0.115	0		Id3	1.13859e-81	0.557281	0.2	0.02	3.53565e-77		Rorc	6.18715e-121	0.469378	0.337	0.014	1.9213e-116		Ctsd	0	0.992292	0.7	0.25	0		S100a6	9.22179e-231	1.32366	0.679	0.176	2.86364e-226		Ccr6	3.79078e-230	0.317235	0.138	0.001	1.17715e-225
Csf2	0	2.48822	0.573	0.077	0		Gbp2	2.07977e-81	1.25096	0.495	0.126	6.4583e-77		Tacstd2	6.26042e-112	0.853473	0.348	0.017	1.94405e-107		Sp100	0	0.983953	0.647	0.193	0		Lgals1	3.86889e-230	1.35975	0.656	0.165	1.20141e-225		Coro2b	3.51818e-229	0.359073	0.206	0.004	1.0925e-224
Nr4a3	0	2.18614	0.84	0.113	0		Hspa8	1.24268e-75	0.688137	1	0.984	3.85891e-71		Capg	9.45771e-103	1.24065	0.697	0.079	2.9369e-98		Gpx4	0	0.975204	0.703	0.3	0		Ramp1	5.21125e-223	1.06123	0.848	0.31	1.61825e-218		Ltb4r1	2.34445e-224	0.704994	0.344	0.016	7.28021e-220
Tnf	0	2.06523	0.795	0.183	0		Hsp90ab1	2.9714e-75	0.647634	1	0.982	9.22709e-71		Cnn3	4.76935e-98	0.421916	0.247	0.009	1.48103e-93		Arhgap45	0	0.972534	0.69	0.209	0		Rplp0	1.49445e-184	0.445684	1	0.999	4.64072e-180		Pxdc1	4.6914e-218	1.16918	0.674	0.076	1.45682e-213
Furin	0	2.04783	0.923	0.16	0		Shmt1	8.66882e-75	0.543316	0.539	0.145	2.69193e-70		S100a4	1.25933e-90	1.08235	0.753	0.098	3.9106e-86		Txk	0	0.97146	0.694	0.279	0		Tcf7	5.55285e-177	0.761184	0.575	0.144	1.72433e-172		Il1r1	4.58041e-206	0.408005	0.202	0.005	1.42235e-201
Nr4a1	0	1.98403	0.808	0.114	0		Kdm6b	6.31583e-74	0.724724	0.895	0.376	1.96125e-69		Gpr183	1.07316e-82	1.18831	0.685	0.092	3.33247e-78		Ms4a4b	0	0.946543	0.976	0.71	0		Smpdl3a	7.91344e-169	0.807787	0.829	0.33	2.45736e-164		Sdc1	1.64192e-189	0.368973	0.188	0.004	5.09867e-185
Irf8	0	1.9284	0.907	0.113	0		Myc	8.2572e-73	0.757466	0.888	0.372	2.56411e-68		Gbp2	7.89551e-79	2.16948	0.753	0.131	2.45179e-74		Rsrp1	0	0.941094	0.912	0.602	0		Pdlim1	3.95308e-167	0.504861	0.393	0.071	1.22755e-162		Blk	1.4734e-188	0.355991	0.142	0.002	4.57536e-184
Rgcc	0	1.74354	0.728	0.174	0		Ppa1	1.42126e-71	0.721857	0.915	0.441	4.41344e-67		Ppp1r14c	4.13814e-77	0.139161	0.09	0.001	1.28502e-72		Hmgb2	0	0.915236	0.763	0.38	0		S1pr1	2.20608e-166	0.474379	0.293	0.038	6.85055e-162		Tmem176a	9.45341e-187	1.33391	0.647	0.083	2.93557e-182
Nfkbid	0	1.65343	0.831	0.173	0		Gm45716	1.81859e-71	0.714495	0.58	0.177	5.64727e-67		Il1r1	1.13225e-74	0.280114	0.191	0.007	3.51599e-70		Rcbtb2	0	0.913637	0.452	0.113	0		Ifngr2	2.38114e-158	0.217193	0.134	0.006	7.39414e-154		Tmem176b	3.42218e-161	1.14513	0.55	0.067	1.06269e-156
Gadd45g	0	1.64824	0.591	0.08	0		Mrps6	4.03027e-69	0.641803	0.715	0.265	1.25152e-64		Tuba8	5.83426e-68	0.0772398	0.056	0	1.81171e-63		Sh3bgrl3	0	0.913124	0.982	0.795	0		Itgb7	5.52667e-157	0.782682	0.876	0.394	1.7162e-152		Lgals3	2.42277e-159	1.33266	0.417	0.038	7.52342e-155
Srgn	0	1.64425	0.999	0.923	0		Mir155hg	5.97094e-69	0.674177	0.532	0.154	1.85415e-64		Il22	3.52452e-61	0.423205	0.056	0.001	1.09447e-56		Lyst	0	0.907867	0.561	0.183	0		Pdlim4	1.149e-156	0.19396	0.092	0.001	3.568e-152		Il18r1	2.17003e-135	1.1269	0.794	0.17	6.73859e-131
Gadd45b	0	1.61545	0.92	0.188	0		Nr4a1	3.55209e-68	0.66325	0.881	0.34	1.10303e-63		Myo1e	1.32697e-58	0.540946	0.517	0.068	4.12064e-54		St8sia4	0	0.904982	0.532	0.139	0		Id3	1.14908e-152	0.714997	0.183	0.015	3.56823e-148		S100a6	2.08264e-120	1.59644	0.789	0.196	6.46723e-116
Ncl	0	1.55041	0.999	0.833	0		Rplp0	1.51606e-67	0.343183	1	0.999	4.70781e-63		Npnt	2.99838e-58	0.0882524	0.067	0.001	9.31087e-54		Cd52	0	0.903115	0.999	0.907	0		Il17rb	4.90779e-150	0.448699	0.321	0.051	1.52402e-145		Actn2	6.40208e-110	0.66609	0.335	0.034	1.98804e-105
Myc	0	1.53405	0.851	0.138	0		Gadd45b	2.46607e-67	0.794975	0.908	0.429	7.65788e-63		Ccr4	1.23658e-57	0.544682	0.438	0.05	3.83994e-53		Il7r	0	0.902527	0.831	0.422	0		mt-Atp6	1.25529e-146	0.29687	1	1	3.89805e-142		Il23r	9.76326e-109	0.239402	0.138	0.005	3.03179e-104
Hspd1	0	1.51155	0.983	0.428	0		Ndrg1	1.1725e-66	0.210765	0.105	0.007	3.64097e-62		Cxcl10	5.87625e-57	2.33859	0.315	0.028	1.82475e-52		Rac2	0	0.901028	0.98	0.776	0		Treml2	1.60085e-146	0.240113	0.152	0.01	4.97111e-142		Lmo4	1.56639e-105	1.35585	0.917	0.355	4.8641e-101
Pim1	0	1.47213	0.935	0.301	0		Cxcl10	5.39157e-65	1.30092	0.197	0.025	1.67425e-60		Lta	7.14181e-56	1.584	0.876	0.227	2.21775e-51		Gimap4	0	0.895735	0.968	0.723	0		Rps3	1.85722e-146	0.32669	1	1	5.76723e-142		Mmp25	1.23916e-103	0.107842	0.06	0	3.84797e-99
Npm1	0	1.44412	1	0.958	0		Hsp90aa1	8.05428e-65	0.728971	0.993	0.802	2.5011e-60		Cpe	7.55763e-56	0.0750042	0.034	0	2.34687e-51		Epsti1	0	0.889082	0.641	0.259	0		Rps11	1.0136e-142	0.353664	0.998	0.999	3.14754e-138		Lgals1	2.80632e-98	1.32631	0.72	0.185	8.71446e-94
Il2ra	0	1.43577	0.934	0.228	0		Cd9	4.59982e-63	0.594495	0.519	0.15	1.42838e-58		Ltb4r1	4.37295e-49	0.397906	0.258	0.021	1.35793e-44		Fam189b	0	0.88506	0.481	0.095	0		Vim	1.62013e-140	0.727963	0.244	0.031	5.03099e-136		Ramp1	1.70924e-97	1.2061	0.881	0.333	5.30769e-93
Cd40lg	0	1.41956	0.645	0.203	0		Hsph1	1.10976e-62	0.68506	0.797	0.339	3.44614e-58		Tnfsf11	9.85327e-49	1.08533	0.607	0.116	3.05974e-44		Apobec3	0	0.882319	0.712	0.334	0		Rps20	1.95207e-140	0.376183	1	0.999	6.06176e-136		Emp3	1.90657e-94	0.999537	0.734	0.187	5.92048e-90
Hsp90aa1	0	1.37295	0.998	0.706	0		Ncl	1.17575e-62	0.713708	0.997	0.888	3.65105e-58		Prelid2	1.25122e-48	0.301641	0.213	0.015	3.88541e-44		Coro1a	0	0.877122	0.968	0.561	0		Lmo4	3.41677e-139	0.996198	0.762	0.339	1.06101e-134		Mtss1	8.25949e-92	0.309913	0.165	0.009	2.56482e-87
Bcl2a1b	0	1.37249	0.978	0.526	0		Nop58	1.3127e-62	0.635402	0.949	0.507	4.07634e-58		Hbegf	3.02794e-48	1.3446	0.584	0.11	9.40266e-44		Dtx1	0	0.864564	0.589	0.194	0		Rps7	6.80763e-135	0.332275	1	1	2.11397e-130		1700113H08Rik	9.74403e-92	0.131872	0.05	0	3.02581e-87
Kdm6b	0	1.36075	0.855	0.143	0		Hspe1	1.8746e-62	0.71151	0.986	0.81	5.8212e-58		Blk	7.09148e-48	0.229345	0.112	0.004	2.20212e-43		Ighm	0	0.86043	0.546	0.155	0		Rpsa	2.92542e-132	0.329654	1	1	9.08429e-128		1700012B07Rik	9.62479e-91	0.115	0.069	0.001	2.98878e-86
Egr3	0	1.34163	0.505	0.07	0		Hspa5	3.3143e-62	0.625506	0.993	0.862	1.02919e-57		Cd83	2.20294e-47	0.75383	0.36	0.042	6.84078e-43		Asb2	0	0.859851	0.447	0.098	0		mt-Co3	1.77987e-131	0.275742	1	1	5.52703e-127		Il7r	3.54823e-87	1.13266	0.991	0.629	1.10183e-82
Nfkb1	0	1.33577	0.951	0.446	0		Eif4a1	8.2606e-62	0.617231	0.993	0.81	2.56516e-57		Sdc1	4.09322e-46	0.251747	0.146	0.007	1.27107e-41		Ckb	0	0.85484	0.699	0.414	0		St8sia6	1.32135e-130	0.218234	0.109	0.005	4.10319e-126		Scpep1	1.68351e-83	0.218593	0.11	0.004	5.2278e-79
Tnfrsf9	0	1.31238	0.704	0.137	0		Hspd1	2.33745e-60	0.708104	0.946	0.611	7.25847e-56		Ncoa7	5.26347e-46	1.28133	0.449	0.068	1.63447e-41		Arhgap9	0	0.848712	0.541	0.156	0		Rasgrp2	8.75589e-129	0.519526	0.401	0.089	2.71897e-124		Kcnc1	6.02464e-79	0.118488	0.064	0.001	1.87083e-74
Cd160	0	1.29159	0.873	0.619	0		Mrto4	2.58582e-60	0.574843	0.875	0.39	8.02974e-56		Lgals1	7.17958e-46	0.880431	0.798	0.192	2.22947e-41		Fyb	0	0.848531	0.807	0.447	0		Nrp1	9.43405e-128	0.390037	0.258	0.039	2.92956e-123		Capg	4.00523e-77	0.846843	0.422	0.077	1.24374e-72
Slamf7	0	1.25725	0.934	0.393	0		Nfkb1	3.04375e-60	0.645916	0.983	0.611	9.45175e-56		Igf1r	2.34961e-45	0.358953	0.247	0.021	7.29623e-41		Limd2	0	0.847622	0.879	0.57	0		Chdh	9.95212e-128	0.301456	0.226	0.029	3.09043e-123		Aqp3	2.91138e-74	0.326488	0.188	0.016	9.04071e-70
Eif5a	0	1.25638	0.999	0.808	0		Rps8	3.36576e-60	0.288369	1	0.999	1.04517e-55		Nrip1	2.55147e-45	1.21617	0.944	0.401	7.92307e-41		Sh2d1a	0	0.847439	0.583	0.192	0		Rps19	4.77844e-126	0.343741	1	0.999	1.48385e-121		Emb	8.47317e-72	0.893852	0.876	0.376	2.63117e-67
Hspa8	0	1.2444	1	0.977	0		Gpr183	3.49602e-60	0.752713	0.373	0.089	1.08562e-55		Il12rb1	4.45751e-44	0.708908	0.652	0.137	1.38419e-39		Tspan32	0	0.833789	0.573	0.19	0		Kcnn4	2.55658e-125	0.532057	0.456	0.12	7.93896e-121		Kcnk1	1.64049e-69	0.117148	0.05	0.001	5.09421e-65
Nr4a2	0	1.24367	0.382	0.025	0		Ncoa7	1.01013e-59	0.899658	0.305	0.064	3.13675e-55		Tmem176a	1.20178e-39	0.863536	0.506	0.092	3.73189e-35		Shisa5	0	0.832043	0.985	0.858	0		Rpl28	6.4529e-125	0.429763	1	0.993	2.00382e-120		Il17rb	2.79507e-69	0.598211	0.362	0.062	8.67952e-65
Mif	0	1.24173	0.964	0.518	0		Spry1	5.3946e-59	0.709431	0.563	0.183	1.67518e-54		S100a6	6.58122e-39	0.781588	0.775	0.204	2.04367e-34		Atp8a2	0	0.829918	0.434	0.105	0		S100a11	6.41404e-124	0.775204	0.883	0.529	1.99175e-119		She	3.47187e-67	0.199388	0.11	0.006	1.07812e-62
Eif4a1	0	1.23428	0.996	0.719	0		Bcl2a1b	9.36277e-59	0.663685	0.98	0.675	2.90742e-54		Pou2af1	4.61682e-38	0.370975	0.213	0.019	1.43366e-33		Cox7a2l	0	0.823185	0.862	0.578	0		Rpl10a	3.43636e-123	0.380581	1	0.995	1.06709e-118		Itgb7	5.08628e-67	0.971857	0.862	0.416	1.57944e-62
Odc1	0	1.23155	0.89	0.245	0		Nolc1	1.01161e-58	0.609364	0.922	0.457	3.14135e-54		Dusp4	3.47572e-37	0.185526	0.135	0.008	1.07931e-32		Gm2682	0	0.821639	0.673	0.344	0		Arl4c	5.69636e-123	0.734305	0.757	0.318	1.76889e-118		Gm9961	1.35564e-66	0.076096	0.041	0	4.20966e-62
Srm	0	1.20545	0.88	0.166	0		Kdm2b	1.12339e-57	0.75639	0.783	0.353	3.48847e-53		Gjb2	7.55586e-36	0.100808	0.056	0.001	2.34632e-31		Evl	0	0.816192	0.556	0.183	0		Itga4	6.14682e-121	0.420155	0.24	0.035	1.90877e-116		Deptor	3.01336e-66	0.184955	0.092	0.004	9.3574e-62
Pim3	0	1.18817	0.832	0.127	0		Gnl3	2.20775e-57	0.606575	0.912	0.48	6.85571e-53		Jaml	2.77359e-35	0.890388	0.82	0.246	8.61282e-31		Gpsm3	0	0.813122	0.641	0.243	0		mt-Co2	6.42829e-120	0.265362	1	1	1.99618e-115		Itgae	1.9677e-65	0.28153	0.119	0.007	6.11028e-61
Ppa1	0	1.18114	0.899	0.218	0		Ran	6.84109e-57	0.627711	0.98	0.776	2.12436e-52		Itgae	6.96317e-35	0.192863	0.135	0.008	2.16227e-30		Rinl	0	0.802038	0.703	0.335	0		Rasa3	3.137e-117	0.362278	0.257	0.041	9.74134e-113		Ifngr1	5.70462e-64	1.18359	0.711	0.255	1.77145e-59
Ddx21	0	1.16284	0.962	0.371	0		Rpl15	1.10361e-56	0.309828	1	0.999	3.42704e-52		Cd274	1.018e-34	0.657193	0.506	0.102	3.16121e-30		Id2	0	0.799466	0.995	0.892	0		Rpl32	5.78809e-115	0.300973	1	1	1.79737e-110		Rnf144a	6.37571e-62	0.467699	0.321	0.053	1.97985e-57
Tagap	0	1.16071	0.772	0.136	0		Eif5a	1.7021e-55	0.586583	1	0.871	5.28553e-51		Xkrx	1.64533e-34	0.187045	0.146	0.01	5.10924e-30		Aes	0	0.797542	0.826	0.464	0		mt-Cytb	1.41174e-114	0.308229	1	1	4.38388e-110		Fst	7.4082e-62	0.107506	0.05	0.001	2.30047e-57
Nop58	0	1.15232	0.927	0.303	0		Lyar	3.73867e-54	0.617753	0.871	0.429	1.16097e-49		Ppa1	4.85278e-34	0.846378	0.966	0.451	1.50693e-29		Pde7a	0	0.79569	0.457	0.142	0		Eef1a1	3.01787e-109	0.277885	1	1	9.3714e-105		Klf2	1.09438e-61	0.889274	0.555	0.15	3.39838e-57
Gnl3	0	1.14964	0.929	0.26	0		Nop56	1.40688e-53	0.616923	0.925	0.544	4.36878e-49		Mrps6	7.53904e-34	0.771311	0.843	0.273	2.3411e-29		Mxd4	0	0.792273	0.429	0.089	0		Flna	1.09108e-108	0.427546	0.353	0.081	3.38813e-104		Cd7	2.51752e-60	0.673914	0.482	0.115	7.81765e-56
Rel	0	1.14212	0.777	0.199	0		Srm	1.82596e-52	0.590938	0.847	0.401	5.67014e-48		Ogfrl1	7.15288e-33	0.0789028	0.045	0.001	2.22118e-28		Cxcr3	0	0.783636	0.626	0.285	0		Rack1	6.58043e-108	0.304876	1	0.998	2.04342e-103		1500009L16Rik	2.71968e-57	0.171179	0.096	0.005	8.44543e-53
Jaml	0	1.14156	0.564	0.084	0		Psme2	4.72771e-52	0.537248	0.986	0.8	1.4681e-47		Hilpda	8.53475e-33	0.935108	0.674	0.192	2.6503e-28		Sept1	0	0.78076	0.819	0.53	0		Rpl15	1.76937e-106	0.31714	1	0.998	5.49442e-102		Chdh	3.77639e-55	0.346967	0.252	0.037	1.17268e-50
Nhp2	0	1.13725	0.933	0.307	0		Kcnn4	1.04852e-51	0.467154	0.451	0.133	3.25596e-47		Coro2b	1.46529e-32	0.150667	0.124	0.007	4.55017e-28		Ppp1r12a	0	0.779538	0.723	0.471	0		Phf11b	4.19003e-106	0.426582	0.404	0.102	1.30113e-101		Vim	1.64974e-52	0.746264	0.257	0.04	5.12293e-48
Map2k3	0	1.135	0.775	0.161	0		Il13	1.62136e-51	0.915301	0.715	0.31	5.03482e-47		Pdlim1	1.4934e-32	0.477866	0.461	0.089	4.63746e-28		Gimap6	0	0.777911	0.914	0.724	0		S100a10	4.37658e-106	0.653487	0.98	0.748	1.35906e-101		Avpi1	1.76162e-52	0.257532	0.174	0.019	5.47035e-48
Nolc1	0	1.13034	0.898	0.242	0		Mat2a	2.35849e-51	0.555791	0.956	0.585	7.32383e-47		Tnfrsf21	4.58149e-32	0.179804	0.169	0.014	1.42269e-27		Podnl1	0	0.776125	0.446	0.119	0		Rgs10	8.28991e-105	0.615999	0.541	0.189	2.57427e-100		Nebl	3.55104e-52	0.432586	0.225	0.032	1.1027e-47
Mat2a	0	1.11723	0.956	0.403	0		Snu13	4.07458e-51	0.548982	0.966	0.657	1.26528e-46		Mapkapk3	4.73361e-32	0.653417	0.697	0.2	1.46993e-27		Ptpn18	0	0.772797	0.947	0.788	0		Mctp1	8.46046e-104	0.122132	0.063	0.001	2.62723e-99		mt-Atp6	7.54733e-52	0.301676	1	1	2.34367e-47
Dusp2	0	1.11126	0.915	0.569	0		C1qbp	5.59958e-51	0.561815	0.936	0.541	1.73884e-46		Srxn1	6.146e-32	0.938675	0.382	0.069	1.90852e-27		Rbl2	0	0.769172	0.44	0.113	0		Rps4x	5.76135e-102	0.2764	1	0.999	1.78907e-97		Mycn	1.59643e-51	0.0487706	0.028	0	4.95738e-47
Nop56	0	1.1086	0.939	0.349	0		Il12rb1	7.81245e-51	0.415667	0.454	0.132	2.426e-46		Hspa5	1.2753e-31	1.08528	1	0.865	3.9602e-27		Cd37	0	0.768044	0.705	0.389	0		Dhrs3	6.49986e-102	0.149561	0.101	0.006	2.0184e-97		Gm38411	1.90788e-49	0.0693671	0.041	0.001	5.92454e-45
Hspe1	0	1.10144	0.994	0.719	0		Irf8	1.43892e-50	0.66208	0.844	0.376	4.46828e-46		Hspa8	1.35469e-31	0.796627	1	0.985	4.20672e-27		Serinc3	0	0.766317	0.705	0.385	0		Rpl19	1.13998e-95	0.217553	1	1	3.53998e-91		Igf1r	8.01074e-49	0.347527	0.17	0.02	2.48757e-44
Zfp36l1	0	1.09808	0.842	0.421	0		Cacybp	2.08692e-50	0.591467	0.929	0.599	6.48051e-46		Furin	2.78995e-31	0.926752	0.978	0.421	8.66365e-27		Tmsb4x	0	0.760213	1	0.998	0		Rps3a1	3.02609e-95	0.234412	1	1	9.39692e-91		Cpm	3.07909e-48	0.270906	0.156	0.017	9.56149e-44
Eef1e1	0	1.09606	0.886	0.226	0		Cdca7	2.96181e-50	0.354137	0.346	0.086	9.1973e-46		Mir155hg	2.94849e-31	0.662022	0.618	0.161	9.15595e-27		Cnn2	0	0.759565	0.636	0.258	0		B630019A10Rik	1.13905e-94	0.193116	0.118	0.01	3.53708e-90		Gucy1a1	2.16095e-46	0.111737	0.05	0.001	6.71039e-42
Gch1	0	1.08165	0.586	0.081	0		Ccnd2	5.22887e-50	0.61661	0.986	0.894	1.62372e-45		Rilpl2	4.64026e-31	0.928067	0.91	0.359	1.44094e-26		Cirbp	0	0.758871	0.47	0.148	0		Cdkn2d	1.86876e-94	0.387376	0.363	0.091	5.80307e-90		5830411N06Rik	6.65811e-46	0.240322	0.11	0.009	2.06754e-41
Orai1	0	1.0775	0.869	0.271	0		Srsf7	6.26151e-50	0.576642	0.959	0.618	1.94439e-45		Arg1	1.64911e-30	0.668007	0.169	0.015	5.12097e-26		Psmb8	0	0.758513	0.953	0.713	0		Rpl11	7.70764e-94	0.251065	1	1	2.39345e-89		Selenop	6.04396e-45	0.500436	0.317	0.066	1.87683e-40
C1qbp	0	1.07398	0.931	0.35	0		Eif5b	2.45509e-49	0.612846	0.922	0.594	7.62379e-45		Nfkb1	1.7644e-30	0.95563	0.978	0.619	5.479e-26		Gnai2	0	0.74326	0.75	0.412	0		Laptm5	1.11663e-93	0.531919	0.965	0.714	3.46748e-89		S100a10	6.66001e-45	0.710801	0.972	0.758	2.06813e-40
Ccnd2	0	1.07301	0.995	0.844	0		Nhp2	6.34163e-49	0.562147	0.902	0.514	1.96927e-44		Adam8	3.43646e-30	0.369533	0.213	0.023	1.06712e-25		Lsp1	0	0.735838	0.762	0.368	0		Rps5	1.46256e-93	0.26472	0.998	1	4.5417e-89		Nt5e	9.83405e-45	0.482064	0.321	0.068	3.05377e-40
Srsf7	0	1.07162	0.956	0.453	0		Srgn	6.64903e-49	0.562303	1	0.948	2.06472e-44		Tgtp1	1.25558e-29	0.257779	0.202	0.021	3.89896e-25		Rabac1	0	0.732811	0.712	0.438	0		Cotl1	1.95695e-93	0.570763	0.897	0.53	6.07691e-89		Fam20a	5.43514e-44	0.104353	0.055	0.002	1.68777e-39
Spry1	0	1.06423	0.479	0.041	0		Tomm20	8.69729e-49	0.509987	0.983	0.846	2.70077e-44		Smox	2.12235e-29	0.371317	0.315	0.049	6.59052e-25		Arhgdib	0	0.723682	0.878	0.561	0		Emb	3.10347e-93	0.558933	0.754	0.361	9.63719e-89		Rgs10	1.20387e-42	0.673159	0.56	0.204	3.73838e-38
Irf4	0	1.06371	0.61	0.073	0		Dusp2	1.13445e-48	0.661933	0.956	0.681	3.52279e-44		Map1b	5.80746e-29	0.103126	0.079	0.003	1.80339e-24		Malat1	0	0.711506	1	1	0		Capg	6.63111e-93	0.491712	0.3	0.069	2.05916e-88		Gm2a	2.22848e-42	0.516766	0.39	0.101	6.9201e-38
Hsp90ab1	0	1.06012	1	0.974	0		Rps20	2.09024e-48	0.291645	1	0.999	6.49083e-44		Prr7	6.33185e-29	0.422815	0.382	0.07	1.96623e-24		Itm2b	0	0.704315	0.97	0.842	0		Ripor2	9.85563e-93	0.41425	0.425	0.12	3.06047e-88		Clstn3	2.50529e-42	0.173271	0.087	0.006	7.77968e-38
Ebna1bp2	0	1.05738	0.905	0.317	0		Umps	4.88878e-48	0.483401	0.647	0.254	1.51811e-43		Tmem65	1.11378e-28	0.431088	0.438	0.088	3.45861e-24		Skap1	0	0.703963	0.835	0.565	0		Tspo	1.31381e-92	0.517764	0.917	0.566	4.07978e-88		mt-Co2	3.90351e-42	0.262652	1	1	1.21216e-37
Tfrc	0	1.0471	0.71	0.079	0		Rpl28	4.95994e-48	0.310449	1	0.993	1.54021e-43		Irf8	1.43542e-27	0.850639	0.944	0.385	4.45742e-23		Hcst	0	0.702134	0.866	0.734	0		mt-Co1	4.45122e-92	0.274215	1	1	1.38224e-87		mt-Co1	7.73753e-42	0.304822	1	1	2.40273e-37
Hspa5	0	1.04029	0.998	0.795	0		Hilpda	6.15146e-48	0.563892	0.522	0.186	1.91021e-43		Map2k3	2.02172e-27	0.763146	0.91	0.37	6.27804e-23		Sptssa	0	0.700483	0.836	0.643	0		Crip1	1.24969e-91	0.666012	0.639	0.27	3.88067e-87		Tcf7	8.7733e-42	0.57213	0.514	0.165	2.72437e-37
Bcl2a1d	0	1.01291	0.88	0.324	0		Map2k3	1.32062e-47	0.657448	0.756	0.363	4.10092e-43		Kcnn4	7.18077e-27	0.685907	0.528	0.139	2.22984e-22		Ms4a6b	0	0.698724	0.874	0.621	0		Rpl3	4.12947e-91	0.287401	1	0.998	1.28232e-86		Plin3	4.85934e-41	0.296818	0.229	0.039	1.50897e-36
Lyar	0	1.01228	0.846	0.227	0		Nrip1	1.46628e-47	0.763339	0.773	0.394	4.55324e-43		Slc7a1	8.8204e-27	0.566207	0.652	0.191	2.739e-22		Selplg	0	0.683293	0.688	0.39	0		Pycard	1.01894e-88	0.524977	0.785	0.38	3.1641e-84		Laptm5	1.02915e-40	0.556804	0.977	0.725	3.19583e-36
Ybx3	0	1.00928	0.601	0.099	0		Hnrnpab	2.48767e-47	0.535547	0.942	0.621	7.72497e-43		Marcksl1	1.29679e-26	0.5856	0.438	0.097	4.02692e-22		S100a10	0	0.679875	0.913	0.596	0		Rpl17	5.33154e-88	0.257524	1	1	1.6556e-83		mt-Co3	1.47875e-40	0.258448	1	1	4.59197e-36
Ppan	0	1.0017	0.807	0.159	0		Ybx1	2.92994e-47	0.50845	0.986	0.878	9.09835e-43		Gadd45b	1.5923e-26	0.80798	0.978	0.439	4.94456e-22		Clic1	0	0.662642	0.871	0.682	0		Nsg2	1.56523e-87	0.201647	0.101	0.008	4.86051e-83		Gpr183	5.59241e-40	0.451288	0.362	0.091	1.73661e-35
Tgfb1	0	1.00147	0.872	0.34	0		Ddr1	4.22444e-47	0.274009	0.207	0.036	1.31182e-42		Stx11	3.53379e-26	0.428245	0.506	0.119	1.09735e-21		Ly6e	0	0.648593	0.983	0.881	0		Add3	8.96735e-86	0.441593	0.467	0.152	2.78463e-81		Tspo	6.19746e-40	0.592819	0.922	0.581	1.9245e-35
Snu13	0	0.98477	0.965	0.507	0		Ptma	5.04909e-47	0.430124	1	0.996	1.56789e-42		Psme2	5.18384e-26	0.667064	0.978	0.804	1.60974e-21		Ltb	0	0.647621	0.975	0.783	0		Rpl21	1.34366e-85	0.239425	1	1	4.17247e-81		Plxdc1	2.02794e-39	0.1276	0.064	0.003	6.29736e-35
Ran	0	0.980537	0.984	0.674	0		Ddx21	1.78123e-46	0.541671	0.925	0.567	5.53126e-42		Cavin1	6.62729e-26	0.0560046	0.011	0	2.05797e-21		Cd47	0	0.643332	0.814	0.58	0		Cd5	1.63327e-84	0.526945	0.522	0.195	5.07179e-80		Flna	2.90493e-39	0.502394	0.358	0.093	9.02068e-35
Ranbp1	0	0.973531	0.952	0.448	0		Cct3	1.85795e-46	0.529527	0.932	0.601	5.76948e-42		Ccdc150	6.62729e-26	0.0328645	0.011	0	2.05797e-21		Lck	0	0.642159	0.82	0.588	0		Add1	2.30105e-84	0.370113	0.384	0.108	7.14546e-80		Gclc	1.12479e-38	0.657824	0.459	0.155	3.4928e-34
Srsf2	0	0.966416	0.973	0.539	0		Set	1.99479e-46	0.512403	0.973	0.816	6.19442e-42		A230083G16Rik	6.62729e-26	0.0328645	0.011	0	2.05797e-21		Ptprcap	0	0.640126	0.933	0.75	0		Gpr146	7.13457e-84	0.1662	0.095	0.007	2.2155e-79		Smpdl3a	1.6284e-38	0.591829	0.761	0.354	5.05666e-34
Egr2	0	0.956253	0.513	0.036	0		Chchd4	2.38579e-46	0.458779	0.719	0.295	7.40861e-42		Egfr	6.62729e-26	0.0328165	0.011	0	2.05797e-21		Laptm5	0	0.61909	0.861	0.586	0		Rpl13	1.98e-83	0.211164	1	1	6.14849e-79		Dtx1	1.77581e-38	0.63863	0.803	0.392	5.51442e-34
Kcnq1ot1	0	0.954225	0.926	0.536	0		Timm8a1	5.13951e-46	0.49298	0.759	0.343	1.59597e-41		Gm13483	6.62729e-26	0.0272855	0.011	0	2.05797e-21		Ets1	0	0.613002	0.818	0.604	0		Coro1a	2.11212e-82	0.479649	0.991	0.76	6.55875e-78		Timp2	2.33704e-38	0.444428	0.372	0.1	7.25721e-34
Snrpd1	0	0.940822	0.927	0.41	0		Tnf	5.46224e-46	0.392154	0.831	0.383	1.69619e-41		Gm17473	6.62729e-26	0.0272855	0.011	0	2.05797e-21		Gimap1	0	0.602406	0.892	0.809	0		Scml4	7.50132e-82	0.269248	0.224	0.043	2.32938e-77		Epas1	1.9765e-37	0.231125	0.138	0.017	6.13762e-33
Fbl	0	0.932073	0.927	0.414	0		Npm1	5.91056e-46	0.544927	1	0.972	1.83541e-41		Gm26652	6.62729e-26	0.0235853	0.011	0	2.05797e-21		Tmsb10	0	0.59869	0.998	0.984	0		Rom1	9.89776e-82	0.185067	0.103	0.009	3.07355e-77		Ly6g5b	2.66965e-37	0.428509	0.284	0.063	8.29007e-33
Mrto4	0	0.931366	0.797	0.193	0		Rgcc	1.04334e-45	0.764324	0.749	0.356	3.2399e-41		Med9os	6.62729e-26	0.0209705	0.011	0	2.05797e-21		Pfdn5	0	0.588569	0.968	0.941	0		Il18r1	3.71446e-81	0.410176	0.482	0.162	1.15345e-76		Rhobtb1	3.69848e-37	0.0672572	0.032	0.001	1.14849e-32
Hspa9	0	0.926779	0.876	0.302	0		Gfi1	1.12277e-45	0.51163	0.58	0.22	3.48655e-41		Gm10718	6.62729e-26	0.0206089	0.011	0	2.05797e-21		Cd3d	0	0.573697	0.976	0.893	0		Cd9	5.17768e-80	0.465939	0.424	0.142	1.60783e-75		Ckb	1.03388e-36	0.613036	0.894	0.556	3.21051e-32
Set	0	0.923546	0.989	0.73	0		Orai1	1.91955e-45	0.526882	0.885	0.467	5.96079e-41		Gpr176	6.62729e-26	0.0195238	0.011	0	2.05797e-21		Cxcr6	0	0.563532	0.929	0.818	0		Ifi27l2a	5.59609e-79	0.710779	0.691	0.362	1.73775e-74		Miat	1.22894e-36	0.0675323	0.037	0.001	3.81622e-32
Rsl1d1	0	0.919219	0.931	0.417	0		Nr4a3	1.96785e-45	0.331423	0.841	0.352	6.11075e-41		Fam171a2	6.62729e-26	0.0194866	0.011	0	2.05797e-21		Fth1	0	0.563491	0.995	0.992	0		Rpl39	1.26803e-78	0.314023	1	0.995	3.9376e-74		Olfr60	5.89577e-36	0.0430856	0.023	0	1.83081e-31
Fosl2	0	0.918521	0.521	0.079	0		Lap3	2.20455e-45	0.470231	0.658	0.269	6.84579e-41		G930009F23Rik	6.62729e-26	0.0192002	0.011	0	2.05797e-21		Nkg7	0	0.555882	0.912	0.672	0		Slc22a3	2.40017e-78	0.0877358	0.048	0.001	7.45325e-74		Lrrc17	6.17191e-36	0.0268378	0.023	0	1.91656e-31
Dkc1	0	0.903558	0.831	0.271	0		Ccr4	2.27337e-45	0.307594	0.237	0.048	7.05949e-41		Aqp4	6.62729e-26	0.017989	0.011	0	2.05797e-21		Gimap3	0	0.555244	0.892	0.782	0		Rpl18a	2.52149e-78	0.244452	1	1	7.82999e-74		Sept8	7.91645e-36	0.295582	0.193	0.032	2.4583e-31
Rilpl2	0	0.898181	0.671	0.199	0		Ranbp1	3.03677e-45	0.534307	0.936	0.615	9.43007e-41		1700110C19Rik	6.62729e-26	0.0176057	0.011	0	2.05797e-21		Actr3	0	0.540642	0.894	0.757	0		Lsp1	4.95374e-78	0.559805	0.871	0.554	1.53828e-73		Ccr2	1.31684e-35	0.703075	0.807	0.434	4.08918e-31
Cdv3	0	0.896329	0.87	0.315	0		Znhit6	3.54473e-45	0.435091	0.603	0.232	1.10074e-40		E030044B06Rik	6.62729e-26	0.0175726	0.011	0	2.05797e-21		H2-D1	0	0.464139	0.998	0.996	0		G430095P16Rik	8.69685e-78	0.125381	0.083	0.005	2.70063e-73		Nav2	3.39874e-35	0.292154	0.17	0.026	1.05541e-30
Pdcd1lg2	0	0.889958	0.733	0.179	0		Pdcd1	1.00148e-44	0.409029	0.434	0.136	3.10989e-40		Foxa1	6.62729e-26	0.0168152	0.011	0	2.05797e-21		Actb	0	0.459791	1	0.999	0		Ass1	2.35478e-77	0.37724	0.25	0.058	7.31229e-73		Tcrg-C1	1.40984e-34	0.47506	0.422	0.128	4.37797e-30
Atf3	0	0.888333	0.333	0.028	0		Rsl1d1	1.00374e-44	0.530024	0.919	0.586	3.11692e-40		Stbd1	6.62729e-26	0.0160674	0.011	0	2.05797e-21		Cd3g	0	0.448837	0.985	0.935	0		Rarg	3.38205e-77	0.310685	0.215	0.043	1.05023e-72		S1pr1	1.56117e-34	0.328324	0.243	0.05	4.8479e-30
Hsph1	0	0.887121	0.72	0.157	0		Nme1	1.27466e-44	0.518188	0.966	0.75	3.95819e-40		Gm26579	6.62729e-26	0.0160674	0.011	0	2.05797e-21		Gm42418	0	0.438757	0.999	1	0		Tspan32	1.92043e-76	0.441705	0.773	0.365	5.96351e-72		Rasa4	1.76793e-34	0.146433	0.078	0.006	5.48994e-30
Socs1	0	0.884988	0.686	0.304	0		Eif1a	1.63655e-44	0.508363	0.769	0.364	5.08197e-40		Fam50b	6.62729e-26	0.0154701	0.011	0	2.05797e-21		Rps27	0	0.413585	0.999	0.999	0		Trat1	1.06079e-75	0.438935	0.444	0.154	3.29406e-71		Tacstd2	3.97586e-34	0.185314	0.133	0.017	1.23463e-29
Pa2g4	0	0.881617	0.807	0.258	0		Snrpd1	4.12501e-44	0.492541	0.942	0.58	1.28094e-39		Stmn2	6.62729e-26	0.0153748	0.011	0	2.05797e-21		Rpl39	0	0.401463	0.996	0.995	0		Actn1	5.78203e-75	0.111177	0.075	0.005	1.79549e-70		Plcb4	4.51069e-34	0.309255	0.179	0.03	1.4007e-29
Ptma	0	0.881254	1	0.994	0		Atp1a1	6.71206e-44	0.51805	0.776	0.38	2.0843e-39		1700001D01Rik	6.62729e-26	0.015104	0.011	0	2.05797e-21		Fau	0	0.366621	1	1	0		Rpl27a	3.53856e-74	0.218787	1	1	1.09883e-69		Lrrn2	1.39751e-32	0.0410172	0.018	0	4.33968e-28
Timm8a1	0	0.875087	0.731	0.154	0		Nip7	9.60399e-44	0.487091	0.827	0.403	2.98233e-39		Zc3h12c	6.62729e-26	0.0150817	0.011	0	2.05797e-21		Rps21	0	0.346393	0.998	0.998	0		Rps10	1.40989e-73	0.207309	1	1	4.37814e-69		Add3	4.99269e-32	0.475585	0.472	0.166	1.55038e-27
Rrs1	0	0.869872	0.756	0.166	0		Egr4	1.3702e-43	0.138703	0.054	0.002	4.25487e-39		Gpr161	6.62729e-26	0.01437	0.011	0	2.05797e-21		Rpl18a	0	0.319246	1	1	0		Cmah	1.16218e-72	0.194443	0.123	0.015	3.60891e-68		Tmsb4x	6.68565e-32	0.368403	1	0.999	2.0761e-27
Slc41a1	0	0.869621	0.547	0.083	0		Aen	2.14297e-43	0.414737	0.553	0.205	6.65456e-39		B9d1os	6.62729e-26	0.0136011	0.011	0	2.05797e-21		mt-Co1	0	0.317302	1	1	0		Rpl29	1.20385e-72	0.310273	1	0.98	3.73832e-68		Ripor2	7.30413e-32	0.459661	0.422	0.134	2.26815e-27
Eif1ax	0	0.866078	0.833	0.319	0		Eef1e1	2.25044e-43	0.505144	0.861	0.444	6.9883e-39		Acsl6	6.62729e-26	0.0133729	0.011	0	2.05797e-21		Rpl30	0	0.271822	1	1	0		Dnah8	2.64755e-72	0.100666	0.065	0.003	8.22143e-68		AI467606	1.09506e-31	0.500136	0.569	0.218	3.4005e-27
Ndfip1	0	0.863034	0.881	0.368	0		Mmd	2.46214e-43	0.391912	0.488	0.165	7.64568e-39		Trav13d-3	6.62729e-26	0.0121785	0.011	0	2.05797e-21		Rpl17	0	0.2704	1	1	0		Ctss	8.62714e-72	0.320489	0.341	0.1	2.67899e-67		Rasgrp2	1.46589e-31	0.462523	0.353	0.103	4.55202e-27
Cish	0	0.861834	0.724	0.179	0		Srsf2	4.86863e-43	0.500131	0.983	0.681	1.51186e-38		Gm13807	6.62729e-26	0.0120208	0.011	0	2.05797e-21		Eef1a1	0	0.268248	1	1	0		Rps18	1.71011e-71	0.23025	1	1	5.31041e-67		Dnajc6	5.61884e-31	0.0271588	0.014	0	1.74482e-26
Slamf1	0	0.861763	0.601	0.106	0		Rrp1b	5.46689e-43	0.453537	0.695	0.292	1.69763e-38		Ank3	6.62729e-26	0.0120208	0.011	0	2.05797e-21		Rps16	0	0.259378	1	1	0		Rpl6	1.06257e-70	0.250965	1	0.999	3.29959e-66		Olfr1259	5.61884e-31	0.0227482	0.014	0	1.74482e-26
Yrdc	0	0.861229	0.805	0.222	0		Rrs1	6.70978e-43	0.434733	0.793	0.359	2.08359e-38		4732463B04Rik	6.62729e-26	0.0116736	0.011	0	2.05797e-21		Rps9	0	0.258317	1	1	0		Rps26	2.21495e-70	0.33248	0.995	0.977	6.87808e-66		Matk	5.84745e-31	0.206174	0.142	0.021	1.81581e-26
Magoh	0	0.855846	0.898	0.489	0		Pou2af1	8.76598e-43	0.166985	0.132	0.017	2.7221e-38		Ankrd45	6.62729e-26	0.0111789	0.011	0	2.05797e-21		mt-Atp6	0	0.230425	1	1	0		Arhgdib	2.86722e-70	0.448245	0.952	0.712	8.90359e-66		Pde5a	6.41235e-31	0.0798354	0.037	0.001	1.99123e-26
Cd69	0	0.855084	0.708	0.252	0		Psma7	9.43121e-43	0.457212	0.98	0.762	2.92867e-38		Epdr1	6.62729e-26	0.0104055	0.011	0	2.05797e-21		Rps14	0	0.229255	1	1	0		Pecam1	2.24868e-69	0.275343	0.252	0.061	6.98283e-65		Acsbg1	6.63173e-31	0.367857	0.193	0.036	2.05935e-26
Hnrnpab	0	0.852874	0.937	0.466	0		Dnmt3a	1.34521e-42	0.520961	0.583	0.233	4.17728e-38		Gp9	6.62729e-26	0.00986208	0.011	0	2.05797e-21		Rps24	0	0.223905	1	1	0		Rps16	1.55507e-68	0.202808	1	1	4.82897e-64		C030034L19Rik	1.32999e-30	0.218101	0.17	0.029	4.13003e-26
Sema7a	0	0.845492	0.525	0.031	0		Cct8	2.38875e-42	0.492285	0.946	0.668	7.41778e-38		Kcnk4	6.62729e-26	0.0098293	0.011	0	2.05797e-21		Cd226	2.11106e-305	0.698463	0.708	0.448	6.55548e-301		Rpl9	2.17955e-68	0.198917	1	1	6.76816e-64		Cass4	2.06911e-30	0.0786103	0.046	0.002	6.42521e-26
Etf1	0	0.845172	0.815	0.26	0		Tomm40	3.24241e-42	0.470025	0.8	0.383	1.00687e-37		4930473A02Rik	6.62729e-26	0.00844675	0.011	0	2.05797e-21		Fam105a	2.64537e-305	0.709084	0.496	0.18	8.21465e-301		Anxa5	7.26161e-68	0.268902	0.206	0.044	2.25495e-63		Emp1	5.19976e-30	0.136244	0.106	0.012	1.61468e-25
Gtpbp4	0	0.836733	0.886	0.369	0		Cdv3	3.24453e-42	0.523094	0.871	0.498	1.00753e-37		Iqcf3	6.62729e-26	0.00843914	0.011	0	2.05797e-21		Ypel3	7.15738e-305	0.735449	0.42	0.103	2.22258e-300		Cdc25b	2.61554e-67	0.165426	0.111	0.013	8.12204e-63		S100a11	5.60674e-30	0.662632	0.803	0.547	1.74106e-25
Btg3	0	0.832891	0.598	0.08	0		Anp32b	4.31216e-42	0.508063	0.946	0.719	1.33905e-37		Gm45716	1.08941e-25	0.620923	0.629	0.185	3.38293e-21		Tspo	1.71736e-302	0.612872	0.729	0.434	5.33292e-298		Fam69a	1.74298e-66	0.266542	0.221	0.051	5.41246e-62		Mturn	8.1929e-30	0.159121	0.115	0.014	2.54414e-25
Nfkbia	0	0.83182	0.944	0.594	0		Slc7a1	4.66849e-42	0.38821	0.522	0.185	1.44971e-37		Irf4	1.20598e-25	0.752624	0.742	0.256	3.74494e-21		Adcy7	7.72565e-300	0.726195	0.457	0.143	2.39905e-295		Ptpn6	2.28054e-66	0.406975	0.499	0.195	7.08177e-62		Plec	1.24596e-29	0.271369	0.243	0.056	3.86907e-25
Cacybp	0	0.830513	0.911	0.448	0		Pno1	7.55246e-42	0.43094	0.634	0.26	2.34527e-37		Cdv3	1.36104e-25	0.746302	0.955	0.505	4.22643e-21		H2afv	2.06096e-299	0.701507	0.539	0.236	6.3999e-295		Dpp4	1.50144e-65	0.292313	0.329	0.098	4.66243e-61		Lsp1	1.32469e-29	0.538428	0.885	0.568	4.11356e-25
Cct8	0	0.829792	0.941	0.535	0		Rrp9	7.82248e-42	0.462987	0.678	0.295	2.42911e-37		Cysltr1	1.37761e-25	0.523869	0.236	0.032	4.2779e-21		Klf3	5.49324e-298	0.781132	0.491	0.173	1.70581e-293		1700025G04Rik	2.82379e-65	0.220184	0.166	0.03	8.76872e-61		Gprin3	2.27821e-29	0.144517	0.073	0.006	7.07454e-25
Cycs	0	0.824494	0.916	0.413	0		Rgs16	9.67481e-42	0.303791	0.197	0.036	3.00432e-37		Ptgs2	1.73024e-25	0.32076	0.022	0	5.3729e-21		Hopx	2.11548e-297	0.753372	0.558	0.269	6.5692e-293		Pkp3	7.99673e-65	0.413865	0.502	0.199	2.48323e-60		Prr13	3.98534e-29	0.536969	0.757	0.393	1.23757e-24
Rrp1b	0	0.813308	0.651	0.118	0		Irf4	2.20858e-41	0.486707	0.617	0.249	6.85831e-37		Ncl	1.97957e-25	0.790145	1	0.89	6.14716e-21		Ctsw	3.93563e-297	0.710456	0.669	0.44	1.22213e-292		Gstp3	9.13866e-65	0.207068	0.201	0.043	2.83783e-60		Rarg	6.36844e-29	0.314519	0.225	0.05	1.97759e-24
Kdm2b	0	0.811669	0.636	0.221	0		Egr3	2.44983e-41	0.594419	0.556	0.211	7.60746e-37		Nolc1	2.82624e-25	0.707661	0.966	0.466	8.77634e-21		Apbb1ip	3.71008e-284	0.655675	0.696	0.487	1.15209e-279		Rps13	1.39367e-64	0.1999	1	1	4.32776e-60		Frmd4a	1.09593e-28	0.0925206	0.05	0.003	3.40318e-24
Cct3	0	0.806367	0.922	0.444	0		Mif	3.23189e-41	0.572753	0.936	0.665	1.0036e-36		Nifk	3.09658e-25	0.611774	0.921	0.407	9.61582e-21		Il16	1.40012e-281	0.675314	0.402	0.101	4.3478e-277		Cpm	8.35668e-64	0.178382	0.109	0.014	2.595e-59		Rps11	1.13173e-28	0.257139	1	0.999	3.51436e-24
Nifk	0	0.806289	0.78	0.215	0		Rel	3.4643e-41	0.538922	0.79	0.389	1.07577e-36		Srgn	3.54634e-25	0.806386	1	0.949	1.10124e-20		Cotl1	1.11395e-278	0.612446	0.69	0.402	3.45913e-274		Ccr10	1.04496e-63	0.278938	0.051	0.002	3.24491e-59		Rasa3	2.67108e-28	0.302205	0.225	0.051	8.29451e-24
Cd53	0	0.805773	0.986	0.765	0		Eif2s1	3.47799e-41	0.48096	0.892	0.528	1.08002e-36		Pard3	4.90108e-25	0.0437724	0.034	0.001	1.52193e-20		Trbc2	3.77581e-278	0.499344	0.979	0.948	1.1725e-273		Fxyd5	2.60008e-63	0.447942	0.9	0.669	8.07402e-59		Tagln2	8.53461e-28	0.600984	0.78	0.519	2.65025e-23
Tomm5	0	0.800281	0.876	0.458	0		Irgm1	8.86776e-41	0.796729	0.559	0.243	2.75371e-36		Gfi1	5.81494e-25	0.67411	0.697	0.227	1.80571e-20		Ikzf2	1.18545e-276	0.765388	0.475	0.168	3.68119e-272		Myl6	8.69823e-63	0.35551	0.994	0.969	2.70106e-58		Smox	1.27335e-27	0.297564	0.211	0.047	3.95413e-23
Rbpj	0	0.797904	0.718	0.221	0		Slc5a3	1.13073e-40	0.354154	0.414	0.131	3.51125e-36		Hsp90aa1	8.57395e-25	0.758016	1	0.806	2.66247e-20		Ccnd3	1.28123e-273	0.685317	0.605	0.333	3.97861e-269		Rps29	1.15436e-62	0.242738	1	0.998	3.58464e-58		Psap	1.64135e-27	0.5208	0.679	0.344	5.09689e-23
Lta	0	0.796144	0.471	0.106	0		Tfrc	1.21327e-40	0.432439	0.681	0.287	3.76756e-36		Nhp2	1.12064e-24	0.677389	0.978	0.521	3.47992e-20		Lpar6	7.77788e-272	0.734864	0.433	0.139	2.41527e-267		Gm16152	1.31561e-62	0.0873766	0.061	0.004	4.08537e-58		Slc6a13	2.38144e-27	0.173239	0.124	0.018	7.39508e-23
Tomm20	0	0.79351	0.99	0.775	0		Tnfrsf9	3.92052e-40	0.649302	0.688	0.324	1.21744e-35		Snu13	1.35475e-24	0.684227	0.978	0.664	4.20689e-20		Dok2	2.99316e-267	0.686826	0.555	0.274	9.29465e-263		Matk	7.20861e-62	0.172207	0.12	0.017	2.23849e-57		Abi3bp	3.7946e-27	0.0704531	0.018	0	1.17834e-22
Larp4	0	0.785184	0.713	0.181	0		Ebna1bp2	7.84781e-40	0.481771	0.881	0.511	2.43698e-35		Icos	2.16596e-24	1.09917	0.91	0.537	6.72597e-20		Rpl37a	2.14811e-266	0.262637	0.998	0.999	6.67052e-262		Rps12	2.2109e-61	0.2436	1	0.999	6.86551e-57		Plekhg1	3.7946e-27	0.0297923	0.018	0	1.17834e-22
Serbp1	0	0.778611	0.996	0.849	0		Fas	8.42373e-40	0.486045	0.512	0.192	2.61582e-35		Sept11	2.21962e-24	0.735346	0.82	0.348	6.89258e-20		Rpl27a	7.65173e-266	0.212678	1	1	2.37609e-261		1700097N02Rik	9.21944e-61	0.0866219	0.051	0.002	2.86291e-56		Ahnak	8.02932e-27	0.550085	0.606	0.272	2.49334e-22
Ldha	0	0.775646	0.955	0.633	0		Bcl2a1d	1.11015e-39	0.534947	0.895	0.507	3.44734e-35		Ccnd2	2.61078e-24	0.713701	1	0.896	8.10724e-20		H2-K1	1.34118e-263	0.292283	1	1	4.16476e-259		Timp2	1.11883e-60	0.316826	0.303	0.092	3.47429e-56		Slc25a4	1.07113e-26	0.506679	0.39	0.138	3.32619e-22
Eif1a	0	0.770356	0.722	0.191	0		Cycs	1.15985e-39	0.474224	0.939	0.578	3.60167e-35		Eif4a1	3.64754e-24	0.672621	1	0.814	1.13267e-19		Celf2	1.54104e-263	0.663768	0.603	0.333	4.78541e-259		Rpl23	1.33479e-60	0.191058	1	1	4.14491e-56		Pon2	1.15673e-26	0.439738	0.413	0.151	3.59199e-22
Eif4e	0	0.770024	0.782	0.239	0		Cd83	1.35304e-39	0.492193	0.2	0.04	4.20159e-35		Bcl2a1b	4.58081e-24	0.839199	0.989	0.681	1.42248e-19		4930523C07Rik	2.30143e-263	0.70609	0.5	0.218	7.14663e-259		Cxcr4	2.00464e-60	0.156154	0.114	0.016	6.22502e-56		Cnn3	1.75757e-26	0.144999	0.087	0.01	5.45777e-22
Fkbp4	0	0.769268	0.82	0.315	0		Hspa9	1.97603e-39	0.469255	0.864	0.491	6.13617e-35		Cnbp	6.03445e-24	0.601214	0.989	0.817	1.87388e-19		Pik3r1	4.54231e-261	0.665043	0.487	0.194	1.41052e-256		Rpl18	7.21312e-60	0.198689	1	1	2.23989e-55		Gm17745	2.89875e-26	0.207092	0.133	0.021	9.00148e-22
Eif2s1	0	0.76603	0.865	0.365	0		Rcl1	2.68291e-39	0.401055	0.597	0.242	8.33123e-35		Hsp90ab1	2.44259e-23	0.584951	1	0.983	7.58499e-19		Tmem50a	7.34261e-257	0.628853	0.579	0.295	2.2801e-252		Gm9885	1.51021e-59	0.0871432	0.055	0.003	4.68966e-55		mt-Nd4	9.53349e-26	0.24094	1	1	2.96044e-21
Naa50	0	0.763163	0.747	0.223	0		Cct5	5.32399e-39	0.445266	0.956	0.695	1.65326e-34		Rexo2	3.61442e-23	0.665623	0.888	0.391	1.12239e-18		Gmfg	1.70929e-254	0.596002	0.698	0.465	5.30785e-250		Aldh2	1.57674e-59	0.110379	0.08	0.007	4.89626e-55		Itm2b	1.09525e-25	0.428099	0.995	0.907	3.40109e-21
Eif2s2	0	0.758416	0.949	0.559	0		Ldha	5.58016e-39	0.503757	0.98	0.738	1.73281e-34		Ddx21	3.64623e-23	0.696555	0.978	0.574	1.13226e-18		Crot	9.21192e-253	0.656495	0.354	0.083	2.86058e-248		Sptbn1	2.02693e-59	0.392199	0.507	0.21	6.29422e-55		Slc25a24	2.90733e-25	0.159871	0.119	0.018	9.02812e-21
M6pr	0	0.757214	0.765	0.278	0		Eif4e	5.8684e-39	0.454532	0.807	0.417	1.82231e-34		Pusl1	5.30702e-23	0.394634	0.449	0.109	1.64799e-18		Akap13	2.26761e-252	0.649234	0.596	0.342	7.0416e-248		Gmfg	6.01393e-59	0.433368	0.853	0.569	1.86751e-54		Selplg	3.18233e-25	0.455043	0.858	0.54	9.88209e-21
Eea1	0	0.752376	0.505	0.101	0		Gm16181	7.59689e-39	0.0756046	0.061	0.004	2.35906e-34		Atad3a	7.90011e-23	0.48441	0.663	0.208	2.45322e-18		Ablim1	4.53881e-252	0.625467	0.588	0.308	1.40944e-247		Rps9	7.56215e-59	0.198794	1	1	2.34827e-54		Dock5	3.96079e-25	0.239605	0.193	0.042	1.22994e-20
Map3k8	0	0.747357	0.504	0.092	0		Slc19a1	9.27434e-39	0.394378	0.505	0.191	2.87996e-34		Gnl3	1.24609e-22	0.65401	0.966	0.489	3.86947e-18		Acp5	5.37023e-251	0.655794	0.44	0.155	1.66762e-246		Nrgn	2.06253e-58	0.284807	0.063	0.004	6.40476e-54		Fry	1.48352e-24	0.128873	0.064	0.006	4.60676e-20
Wdr43	0	0.744824	0.76	0.24	0		Cd24a	1.26915e-38	0.397324	0.207	0.043	3.94108e-34		Nop16	1.5827e-22	0.58584	0.629	0.22	4.91474e-18		Gramd3	1.01856e-249	0.687382	0.349	0.083	3.16294e-245		Slfn5	4.81031e-58	0.322847	0.273	0.079	1.49375e-53		Rinl	2.09735e-24	0.449005	0.844	0.521	6.5129e-20
Snrpa1	0	0.744814	0.812	0.296	0		Timm10	1.52361e-38	0.411212	0.651	0.278	4.73126e-34		Ddr1	1.98724e-22	0.314502	0.247	0.04	6.17096e-18		Ifi203	8.98067e-249	0.655609	0.554	0.259	2.78877e-244		Myl12b	4.91074e-58	0.383609	0.94	0.757	1.52493e-53		mt-Cytb	2.19442e-24	0.23219	1	1	6.81433e-20
Tnfaip3	0	0.743039	0.603	0.151	0		Pdlim1	1.53131e-38	0.293478	0.315	0.086	4.75517e-34		Manf	2.02439e-22	0.865687	0.966	0.602	6.28634e-18		Sri	2.65598e-248	0.578981	0.712	0.498	8.2476e-244		Rpl12	3.47354e-57	0.201465	1	1	1.07864e-52		Tube1	2.54974e-24	0.0755239	0.055	0.004	7.91772e-20
Prmt1	0	0.742179	0.849	0.366	0		Ccdc86	2.6368e-38	0.385146	0.617	0.255	8.18807e-34		Actg1	2.35441e-22	0.690098	1	0.984	7.31115e-18		Tecpr1	3.26428e-247	0.662211	0.45	0.163	1.01366e-242		Arpc1b	7.48682e-57	0.358944	0.963	0.88	2.32488e-52		Acbd7	2.81995e-24	0.0805788	0.046	0.003	8.75681e-20
Syncrip	0	0.740859	0.877	0.401	0		Sdad1	2.78936e-38	0.372453	0.583	0.231	8.6618e-34		Npm1	3.00066e-22	0.695306	1	0.972	9.31795e-18		Tbc1d10c	5.86764e-247	0.637994	0.441	0.157	1.82208e-242		Lef1	1.43515e-56	0.471518	0.573	0.287	4.45658e-52		Pi4k2a	2.99988e-24	0.37029	0.294	0.092	9.31554e-20
Utf1	0	0.739374	0.475	0.04	0		Stip1	4.30603e-38	0.456628	0.732	0.349	1.33715e-33		Myc	3.5929e-22	0.758224	0.876	0.383	1.1157e-17		Rps11	7.94103e-244	0.218508	0.999	1	2.46593e-239		Tnfrsf13b	7.42833e-56	0.200221	0.189	0.043	2.30672e-51		Zfp516	3.06725e-24	0.221237	0.142	0.026	9.52474e-20
Mybbp1a	0	0.738297	0.663	0.159	0		Ifrd2	7.27585e-38	0.372189	0.454	0.159	2.25937e-33		Atp2a2	3.76992e-22	0.642154	0.809	0.333	1.17067e-17		Dguok	5.41442e-240	0.657867	0.438	0.169	1.68134e-235		Tagln2	7.44894e-56	0.486427	0.79	0.506	2.31312e-51		Jun	4.55962e-24	0.595309	0.651	0.349	1.4159e-19
Eprs	0	0.737409	0.821	0.329	0		Uck2	7.30933e-38	0.398968	0.508	0.192	2.26977e-33		Aen	4.35315e-22	0.46712	0.652	0.211	1.35178e-17		Vamp8	3.1918e-238	0.629496	0.482	0.211	9.91148e-234		Rpl8	1.35135e-55	0.172879	1	1	4.19633e-51		Cyp4f16	5.39434e-24	0.212409	0.147	0.027	1.67511e-19
Noc2l	0	0.737384	0.703	0.188	0		Btla	9.20368e-38	0.347122	0.441	0.15	2.85802e-33		Bcl2a1d	7.30113e-22	0.702588	0.944	0.514	2.26722e-17		Stk17b	3.49191e-238	0.596972	0.661	0.437	1.08434e-233		Prr13	1.52214e-55	0.397819	0.707	0.38	4.72671e-51		Anxa6	7.21402e-24	0.476239	0.661	0.348	2.24017e-19
Crem	0	0.735966	0.481	0.065	0		Gar1	1.09219e-37	0.41543	0.739	0.349	3.39159e-33		Rgmb	7.36449e-22	0.0556405	0.045	0.001	2.2869e-17		Prex1	7.6261e-238	0.657702	0.4	0.131	2.36813e-233		Gnai2	2.93542e-55	0.374885	0.882	0.569	9.11535e-51		Lgmn	9.705e-24	0.101714	0.06	0.005	3.01369e-19
Ndufaf4	0	0.734226	0.685	0.171	0		Rps2	1.39762e-37	0.276864	1	0.998	4.34004e-33		Hk2	9.122e-22	0.393731	0.337	0.071	2.83266e-17		Zfp512	2.29039e-235	0.655777	0.306	0.059	7.11234e-231		Trib2	3.22698e-55	0.305359	0.24	0.066	1.00207e-50		Spsb1	1.33888e-23	0.0571247	0.028	0.001	4.15764e-19
Fabp5	0	0.732987	0.493	0.079	0		Eef1b2	1.41529e-37	0.266357	1	0.992	4.3949e-33		Sema4b	9.60583e-22	0.49332	0.326	0.065	2.9829e-17		Bcl11b	3.65017e-234	0.600201	0.628	0.362	1.13349e-229		Trpv2	3.62405e-55	0.218678	0.237	0.063	1.12538e-50		Nsg2	1.5715e-23	0.155636	0.092	0.012	4.87997e-19
Cct5	0	0.728204	0.944	0.574	0		Ndfip1	2.03867e-37	0.486829	0.892	0.537	6.33067e-33		Lyar	1.71672e-21	0.630384	0.921	0.438	5.33094e-17		Atf7ip	1.25021e-232	0.667299	0.404	0.138	3.88228e-228		Rpl7	7.72243e-55	0.198825	1	0.999	2.39805e-50		4833412C05Rik	2.87132e-23	0.0356067	0.018	0	8.91631e-19
Bcl2l11	0	0.727863	0.535	0.137	0		Gtpbp4	2.54873e-37	0.451798	0.898	0.539	7.91456e-33		Kras	2.15277e-21	0.656285	0.865	0.404	6.685e-17		Tnrc6b	1.04525e-230	0.632614	0.449	0.175	3.24581e-226		AI467606	8.64457e-55	0.309951	0.512	0.205	2.6844e-50		Npl	2.88632e-23	0.0345128	0.018	0	8.96288e-19
Mphosph10	0	0.724395	0.811	0.297	0		Cd3eap	2.63718e-37	0.389578	0.607	0.247	8.18923e-33		Lap3	2.59325e-21	0.543884	0.742	0.276	8.05281e-17		Arhgap15	7.63088e-229	0.622306	0.579	0.334	2.36962e-224		Rpl4	9.79979e-55	0.253565	0.997	0.989	3.04313e-50		Ramp3	3.13175e-23	0.266792	0.211	0.053	9.72502e-19
Pgam1	0	0.723431	0.825	0.344	0		Etf1	3.15152e-37	0.441479	0.834	0.442	9.78643e-33		Hsp90b1	2.85541e-21	0.777891	0.989	0.78	8.86691e-17		Zbtb38	7.76388e-228	0.636584	0.338	0.085	2.41092e-223		Esyt1	1.22462e-54	0.363636	0.473	0.198	3.80282e-50		Eid1	4.05631e-23	0.398237	0.505	0.212	1.25961e-18
Slc1a5	0	0.722916	0.712	0.212	0		Ybx3	7.16462e-37	0.560926	0.6	0.264	2.22483e-32		Mrto4	2.95226e-21	0.556711	0.91	0.399	9.16764e-17		Cd28	5.37344e-227	0.612964	0.56	0.283	1.66862e-222		Ly6c1	1.41912e-54	0.323845	0.258	0.076	4.4068e-50		Tjp3	7.09207e-23	0.114223	0.073	0.008	2.2023e-18
Nap1l1	0	0.719668	0.825	0.382	0		Sco2	8.12767e-37	0.324606	0.481	0.172	2.52388e-32		Serpinb1a	3.2576e-21	0.194561	0.169	0.02	1.01158e-16		Scp2	8.71878e-226	0.567894	0.608	0.372	2.70744e-221		Cd28	4.68377e-54	0.408777	0.736	0.407	1.45445e-49		Sema4b	8.26225e-23	0.274026	0.234	0.064	2.56568e-18
Ybx1	0	0.716721	0.988	0.823	0		Eif2s2	8.29308e-37	0.462277	0.949	0.687	2.57525e-32		Cdca7	4.04209e-21	0.335859	0.393	0.091	1.25519e-16		Cdk2ap2	1.242e-225	0.58669	0.62	0.394	3.85679e-221		Fbln1	9.95284e-54	0.0490184	0.034	0.001	3.09066e-49		B3galt2	1.35831e-22	0.128166	0.073	0.008	4.21797e-18
Pdia6	0	0.716402	0.899	0.476	0		Gfod1	8.43898e-37	0.351701	0.447	0.156	2.62056e-32		Nop58	4.07885e-21	0.63209	0.978	0.516	1.2666e-16		Itgal	4.91157e-221	0.603463	0.684	0.549	1.52519e-216		Nt5c	1.43042e-53	0.388396	0.713	0.404	4.44187e-49		Gpx1	1.42998e-22	0.548309	0.642	0.375	4.44051e-18
Rrp9	0	0.714936	0.635	0.131	0		Serbp1	1.15777e-36	0.40047	0.993	0.897	3.59521e-32		Hspa9	4.3158e-21	0.583665	0.955	0.498	1.34018e-16		Itgb2	1.60802e-220	0.57126	0.688	0.526	4.99338e-216		Rps2	2.23719e-53	0.228892	1	0.998	6.94716e-49		Cd79b	1.69066e-22	0.093555	0.032	0.001	5.25e-18
Rheb	0	0.710654	0.852	0.406	0		Il2ra	1.24889e-36	0.428359	0.885	0.462	3.87817e-32		Ran	4.45733e-21	0.590971	1	0.78	1.38413e-16		Cd3e	1.1924e-219	0.51354	0.784	0.692	3.70276e-215		Dgka	2.26707e-53	0.302233	0.343	0.118	7.03993e-49		Maf	1.98758e-22	0.495302	0.693	0.382	6.17203e-18
Tma16	0	0.710514	0.567	0.097	0		Utp18	1.30764e-36	0.418878	0.692	0.321	4.06063e-32		St6galnac4	4.78479e-21	0.533363	0.685	0.248	1.48582e-16		Myl12b	5.34257e-219	0.452485	0.823	0.708	1.65903e-214		Rps8	2.84616e-53	0.192146	1	0.999	8.83817e-49		Pag1	2.02561e-22	0.368691	0.431	0.167	6.29014e-18
Arid5b	0	0.708687	0.58	0.162	0		Cd69	1.37998e-36	0.603811	0.763	0.4	4.28525e-32		Kdm6b	5.12821e-21	0.642792	0.899	0.387	1.59246e-16		Pnrc1	2.43359e-217	0.60882	0.617	0.438	7.55702e-213		H3f3a	4.45576e-53	0.266849	1	0.975	1.38365e-48		Bcl11b	2.10692e-22	0.442524	0.807	0.495	6.54263e-18
Nsun2	0	0.707732	0.716	0.217	0		Tcp1	1.48919e-36	0.441619	0.898	0.592	4.6244e-32		Rsl1d1	5.44042e-21	0.620295	0.989	0.592	1.68941e-16		Psap	1.26631e-216	0.623009	0.471	0.218	3.93227e-212		mt-Nd4	5.05887e-53	0.205455	1	1	1.57093e-48		Lrrc8b	2.13071e-22	0.237269	0.124	0.022	6.6165e-18
Tgif1	0	0.707537	0.487	0.052	0		Agpat5	1.72097e-36	0.37642	0.614	0.256	5.34414e-32		Strap	7.3233e-21	0.585396	0.955	0.481	2.27411e-16		Ppp1ca	7.96239e-214	0.505204	0.735	0.599	2.47256e-209		Rpl14	8.99689e-53	0.204234	1	0.999	2.7938e-48		Pdlim1	2.65227e-22	0.334382	0.28	0.088	8.23609e-18
Rrp15	0	0.70533	0.66	0.163	0		Rpl4	2.16762e-36	0.27001	1	0.989	6.73111e-32		Vdr	7.3414e-21	0.129574	0.056	0.002	2.27973e-16		Clec2i	1.66829e-213	0.613621	0.3	0.065	5.18055e-209		Gpx1	1.14366e-52	0.451242	0.642	0.362	3.5514e-48		Cited4	3.88781e-22	0.267055	0.197	0.049	1.20728e-17
Sytl3	0	0.705293	0.61	0.139	0		Mphosph10	2.55948e-36	0.444869	0.858	0.465	7.94795e-32		Rgcc	7.82391e-21	0.903452	0.82	0.363	2.42956e-16		Arhgef1	3.58533e-213	0.611448	0.508	0.26	1.11335e-208		Tlr1	1.16676e-52	0.0987231	0.069	0.006	3.62315e-48		Hormad2	4.5966e-22	0.0421277	0.028	0.001	1.42738e-17
Tnfsf14	0	0.703299	0.688	0.262	0		Dkc1	6.33215e-36	0.452599	0.844	0.455	1.96632e-31		Syncrip	1.0064e-20	0.607229	0.978	0.563	3.12518e-16		Gnb2	4.40346e-213	0.568369	0.584	0.359	1.36741e-208		Cox7a2l	1.33991e-52	0.358874	0.945	0.712	4.16083e-48		Arhgdib	4.76973e-22	0.389727	0.95	0.723	1.48114e-17
Batf	0	0.702775	0.586	0.195	0		Rexo2	6.86337e-36	0.461663	0.756	0.385	2.13128e-31		Fam167a	1.58986e-20	0.026677	0.022	0	4.93699e-16		Tsc22d4	2.51537e-212	0.624879	0.473	0.231	7.81098e-208		Tdrp	8.47794e-52	0.0909349	0.048	0.002	2.63266e-47		Clic1	5.2331e-22	0.370761	0.968	0.777	1.62504e-17
G3bp1	0	0.702474	0.951	0.601	0		St6galnac4	7.86335e-36	0.408565	0.573	0.242	2.44181e-31		Eif5a	1.90461e-20	0.603513	1	0.873	5.91438e-16		Sipa1	2.76307e-212	0.603787	0.361	0.115	8.58016e-208		9530036M11Rik	1.21237e-51	0.132913	0.065	0.005	3.76476e-47		Eef1a1	6.98027e-22	0.187449	1	1	2.16758e-17
Ppid	0	0.701372	0.757	0.281	0		Ppp1r14b	1.14019e-35	0.437233	0.949	0.706	3.54064e-31		Pacsin2	2.08646e-20	0.346143	0.337	0.072	6.47908e-16		H2-T22	6.22541e-212	0.621336	0.489	0.246	1.93318e-207		Rpl5	1.22561e-51	0.193134	1	0.999	3.8059e-47		Xlr4a	1.03394e-21	0.380201	0.376	0.143	3.21068e-17
Tmed5	0	0.701355	0.865	0.421	0		Zfp36l1	1.39374e-35	0.541456	0.892	0.558	4.32799e-31		Hspd1	2.53433e-20	0.67402	1	0.618	7.86986e-16		Ppp1r18	3.34471e-211	0.618852	0.459	0.212	1.03863e-206		Ppp1ca	1.42255e-51	0.360151	0.9	0.655	4.41745e-47		Stx1a	1.38241e-21	0.0603415	0.037	0.002	4.29279e-17
Chchd4	0	0.698317	0.631	0.135	0		Emc6	2.55838e-35	0.4406	0.875	0.536	7.94453e-31		Nop56	3.7624e-20	0.600797	0.966	0.551	1.16834e-15		St3gal6	2.77575e-210	0.601213	0.336	0.093	8.61955e-206		Slc25a4	3.5558e-51	0.315942	0.35	0.129	1.10418e-46		Cdkn1b	1.40158e-21	0.381741	0.5	0.209	4.35231e-17
Ehd1	0	0.69643	0.516	0.073	0		Ptges3	3.48726e-35	0.425783	0.922	0.572	1.0829e-30		Bzw1	4.80525e-20	0.546886	0.989	0.72	1.49217e-15		Abhd8	1.48745e-207	0.594325	0.395	0.144	4.61896e-203		Ppdpf	9.62336e-51	0.394605	0.607	0.316	2.98834e-46		Trpv2	1.75681e-21	0.291833	0.243	0.07	5.45542e-17
Ppp1r14b	0	0.68972	0.949	0.587	0		Rnf149	4.41807e-35	0.413585	0.519	0.205	1.37194e-30		Fas	6.86293e-20	0.46916	0.607	0.197	2.13114e-15		Psmb9	1.68418e-207	0.567228	0.615	0.396	5.22988e-203		Ccdc28b	1.6602e-50	0.109516	0.089	0.011	5.15541e-46		Rsrp1	2.03135e-21	0.37816	0.968	0.76	6.30795e-17
Pfdn2	0	0.689002	0.92	0.517	0		Noc4l	5.51301e-35	0.379896	0.546	0.225	1.71196e-30		Hsph1	7.2673e-20	0.566836	0.82	0.349	2.25671e-15		Rpl19	4.68033e-206	0.164573	1	1	1.45338e-201		Atp1b3	1.96038e-50	0.481356	0.665	0.396	6.08758e-46		Rom1	2.25644e-21	0.205815	0.092	0.013	7.00693e-17
Anp32b	0	0.688125	0.935	0.614	0		Rrp15	5.6712e-35	0.420451	0.685	0.325	1.76108e-30		Ramp1	7.92479e-20	0.689703	0.787	0.341	2.46088e-15		Ndufb11	6.80396e-206	0.505328	0.706	0.578	2.11283e-201		Aes	2.2726e-50	0.355987	0.909	0.636	7.05709e-46		Cep63	3.14865e-21	0.290528	0.257	0.078	9.7775e-17
Isy1	0	0.687436	0.657	0.199	0		Syncrip	5.9381e-35	0.436469	0.919	0.556	1.84396e-30		Gbp6	1.25394e-19	0.343408	0.258	0.047	3.89387e-15		Ankrd44	9.6648e-206	0.607914	0.487	0.232	3.00121e-201		S100a4	2.6021e-50	0.479056	0.276	0.092	8.08031e-46		Galnt12	3.18964e-21	0.322955	0.358	0.128	9.90478e-17
Umps	0	0.687357	0.57	0.103	0		Mtap	7.39661e-35	0.433068	0.644	0.294	2.29687e-30		C1qbp	1.2802e-19	0.608694	0.955	0.549	3.97541e-15		9930111J21Rik2	4.09757e-203	0.611645	0.38	0.129	1.27242e-198		Nt5e	4.8727e-50	0.250638	0.226	0.063	1.51312e-45		Gm40909	3.41979e-21	0.0206719	0.009	0	1.06195e-16
Apex1	0	0.670273	0.562	0.111	0		Eif1	7.7923e-35	0.275938	1	0.997	2.41974e-30		Timm9	1.35866e-19	0.48207	0.831	0.34	4.21905e-15		Tmem59	1.12371e-201	0.570223	0.571	0.362	3.48947e-197		Gm973	5.25872e-50	0.0589748	0.031	0.001	1.63299e-45		Arhgap6	3.41979e-21	0.0206108	0.009	0	1.06195e-16
Mir155hg	0	0.660142	0.4	0.039	0		Timm9	8.20695e-35	0.396369	0.705	0.334	2.54851e-30		Pkib	1.70877e-19	0.102884	0.056	0.003	5.30623e-15		Stat1	2.77842e-200	0.60547	0.528	0.271	8.62782e-196		Rps27a	8.43919e-50	0.155251	1	1	2.62062e-45		Flt4	3.41979e-21	0.0179897	0.009	0	1.06195e-16
Kras	0	0.654726	0.693	0.255	0		Tma16	8.95996e-35	0.36535	0.597	0.25	2.78234e-30		Clic4	1.70893e-19	0.254055	0.202	0.031	5.30674e-15		Trim12a	5.32472e-200	0.606342	0.412	0.169	1.65348e-195		Npc2	9.38575e-50	0.38532	0.73	0.433	2.91456e-45		F630028O10Rik	3.41979e-21	0.0174521	0.009	0	1.06195e-16
Lap3	0	0.649584	0.581	0.119	0		Plaur	1.06353e-34	0.148947	0.122	0.018	3.30258e-30		Cacybp	1.74632e-19	0.584055	0.944	0.606	5.42284e-15		mt-Nd4	3.76219e-198	0.219741	0.999	1	1.16827e-193		AB124611	1.8904e-49	0.179109	0.166	0.037	5.87026e-45		AF067061	3.41979e-21	0.0156596	0.009	0	1.06195e-16
Eif3g	0	0.649455	0.865	0.435	0		Rpl22l1	1.15912e-34	0.410024	0.976	0.865	3.59941e-30		Areg	2.19682e-19	0.465929	0.067	0.004	6.8218e-15		Traf3ip3	5.188e-198	0.599142	0.401	0.162	1.61103e-193		Lgals3	4.19055e-49	0.468461	0.163	0.038	1.30129e-44		A930033H14Rik	3.41979e-21	0.0153438	0.009	0	1.06195e-16
Hspa4	0	0.648851	0.825	0.381	0		Fam162a	1.88558e-34	0.456688	0.705	0.359	5.8553e-30		Srsf7	2.26191e-19	0.585035	0.978	0.625	7.02391e-15		Pla2g16	1.41642e-197	0.533847	0.619	0.424	4.39841e-193		Prkcq	5.96019e-49	0.367776	0.614	0.317	1.85082e-44		1810058I24Rik	4.07137e-21	0.441874	0.656	0.374	1.26428e-16
Hnrnpu	0	0.647619	0.978	0.739	0		Grhl1	1.98519e-34	0.093682	0.071	0.006	6.1646e-30		Ranbp1	2.74001e-19	0.603466	0.966	0.621	8.50857e-15		Pbxip1	1.54489e-196	0.587271	0.311	0.082	4.79736e-192		E2f2	6.29936e-49	0.0551206	0.035	0.001	1.95614e-44		Gabbr1	4.83861e-21	0.264618	0.216	0.058	1.50253e-16
Mpp6	0	0.646143	0.638	0.191	0		Rpsa	1.99927e-34	0.207804	1	1	6.20835e-30		Dot1l	2.90696e-19	0.456058	0.551	0.175	9.02699e-15		Commd8	4.47022e-196	0.617947	0.382	0.149	1.38814e-191		Tnfaip8l2	8.348e-49	0.26758	0.432	0.167	2.59231e-44		Parp1	6.97067e-21	0.392655	0.367	0.142	2.1646e-16
Nip7	0	0.645836	0.725	0.251	0		Nop16	2.11309e-34	0.351997	0.539	0.214	6.56178e-30		Shmt1	3.58867e-19	0.463673	0.506	0.154	1.11439e-14		Scand1	4.68597e-196	0.549368	0.622	0.45	1.45513e-191		Rnf144a	1.31643e-48	0.224871	0.192	0.049	4.08792e-44		Atp2b1	7.42269e-21	0.432755	0.853	0.611	2.30497e-16
Ruvbl1	0	0.644826	0.66	0.19	0		Mpp6	2.22144e-34	0.379104	0.712	0.336	6.89823e-30		Samhd1	3.90047e-19	0.930089	0.809	0.387	1.21121e-14		Trip4	1.42323e-195	0.59841	0.314	0.089	4.41955e-191		2600014E21Rik	4.15966e-48	0.103888	0.038	0.002	1.2917e-43		Ostf1	1.35435e-20	0.412013	0.711	0.391	4.20565e-16
Hif1a	0	0.644737	0.677	0.253	0		Nfkbid	2.26362e-34	0.32887	0.814	0.39	7.0292e-30		Il2ra	4.71471e-19	0.577082	0.955	0.47	1.46406e-14		Rps23	1.7078e-194	0.182367	1	1	5.30323e-190		Itm2b	8.34484e-48	0.295724	0.995	0.903	2.59132e-43		Stk24	1.36255e-20	0.451844	0.748	0.471	4.23113e-16
Tomm40	0	0.640572	0.702	0.232	0		Wdr43	2.58911e-34	0.428274	0.793	0.41	8.03997e-30		Tma16	5.29454e-19	0.537402	0.685	0.257	1.64411e-14		P2rx7	4.00653e-194	0.601966	0.403	0.163	1.24415e-189		Rpl30	8.69254e-48	0.17994	1	1	2.69929e-43		Cyb5a	1.83599e-20	0.412091	0.491	0.221	5.70129e-16
Eif5b	0	0.637958	0.88	0.455	0		Polr1d	3.95039e-34	0.399873	0.976	0.782	1.22672e-29		Cd3eap	5.67063e-19	0.499646	0.685	0.254	1.7609e-14		Smpdl3a	5.87819e-194	0.488187	0.499	0.212	1.82535e-189		Slfn1	9.36613e-48	0.335899	0.375	0.146	2.90846e-43		Slc43a2	1.87617e-20	0.228351	0.174	0.041	5.82609e-16
Sssca1	0	0.637626	0.605	0.179	0		Actg1	6.69079e-34	0.46561	1	0.984	2.07769e-29		Fam129a	6.43596e-19	0.573994	0.652	0.232	1.99856e-14		Il2rb	4.69601e-193	0.44424	0.855	0.758	1.45825e-188		Macf1	1.18483e-47	0.378616	0.651	0.356	3.67926e-43		Slc9a2	2.45604e-20	0.0311676	0.018	0	7.62674e-16
Eif3a	0	0.635599	0.959	0.644	0		Fabp5	1.13293e-33	0.478936	0.519	0.214	3.51807e-29		Ak2	7.28141e-19	0.585385	0.91	0.504	2.2611e-14		Zfp36l2	1.594e-191	0.47938	0.782	0.643	4.94985e-187		Supt4a	1.35498e-47	0.377722	0.796	0.531	4.20761e-43		Wdfy2	2.71996e-20	0.143652	0.128	0.025	8.4463e-16
Rcl1	0	0.633985	0.541	0.098	0		Cish	1.26392e-33	0.439361	0.736	0.358	3.92485e-29		Hspe1	7.42402e-19	0.565993	0.989	0.813	2.30538e-14		B2m	3.56753e-191	0.238019	0.998	0.999	1.10783e-186		Tmem50a	1.95506e-47	0.334737	0.77	0.422	6.07104e-43		B3gnt5	4.75405e-20	0.111674	0.055	0.005	1.47627e-15
Larp1	0	0.630293	0.754	0.29	0		Srsf6	1.66981e-33	0.455334	0.892	0.554	5.18527e-29		Eprs	7.91507e-19	0.548487	0.944	0.497	2.45787e-14		Arl6ip1	9.39967e-191	0.527624	0.659	0.522	2.91888e-186		Sike1	2.28901e-47	0.251374	0.276	0.091	7.10807e-43		Dap	5.27552e-20	0.397398	0.5	0.226	1.63821e-15
Ipo5	0	0.628302	0.556	0.122	0		Atf3	1.80218e-33	0.506144	0.373	0.127	5.59631e-29		Eif1	8.12673e-19	0.338716	1	0.997	2.52359e-14		Gimap9	2.75684e-189	0.540245	0.618	0.42	8.56082e-185		Neat1	3.0423e-47	0.330957	0.43	0.18	9.44724e-43		S1pr4	7.53814e-20	0.380802	0.394	0.155	2.34082e-15
Cd3eap	0	0.627325	0.54	0.106	0		Wdr12	2.78286e-33	0.390631	0.576	0.25	8.64163e-29		Cd44	9.81049e-19	0.877567	0.831	0.458	3.04645e-14		Rplp1	5.98373e-188	0.171011	1	1	1.85813e-183		Skap1	4.71646e-47	0.326907	0.928	0.691	1.4646e-42		Nr1d1	2.47675e-19	0.223829	0.133	0.028	7.69105e-15
Cct7	0	0.627149	0.892	0.523	0		Mdn1	3.21094e-33	0.366165	0.607	0.26	9.97093e-29		Ccdc86	1.07946e-18	0.430341	0.719	0.262	3.35206e-14		Psmb10	7.87837e-188	0.498384	0.656	0.454	2.44647e-183		Ablim1	7.04282e-47	0.366072	0.768	0.433	2.18701e-42		Park7	2.58469e-19	0.400357	0.835	0.598	8.02625e-15
Ptges3	0	0.626401	0.87	0.429	0		Nfatc1	3.79296e-33	0.435879	0.627	0.293	1.17783e-28		Srm	1.16716e-18	0.546122	0.888	0.41	3.62438e-14		Pycard	5.23837e-186	0.521161	0.523	0.278	1.62667e-181		Rpl24	1.63601e-46	0.211676	0.998	0.995	5.08031e-42		Pkp3	3.39007e-19	0.439484	0.472	0.213	1.05272e-14
Gpr65	0	0.625922	0.619	0.207	0		Tnip3	4.27847e-33	0.50707	0.254	0.069	1.32859e-28		Cish	1.19462e-18	0.580134	0.82	0.365	3.70966e-14		Snx20	1.30703e-185	0.535885	0.281	0.068	4.05871e-181		Map4k4	1.78966e-46	0.344725	0.571	0.288	5.55743e-42		Arl5c	3.98057e-19	0.183774	0.151	0.034	1.23609e-14
Nudc	0	0.625595	0.81	0.397	0		Pgam1	6.54049e-33	0.424376	0.854	0.502	2.03102e-28		Dnmt3a	1.47546e-18	0.508001	0.64	0.24	4.58175e-14		Saraf	2.51281e-185	0.570074	0.496	0.279	7.80302e-181		Bin1	2.49886e-46	0.312708	0.438	0.183	7.75971e-42		Stab2	4.00746e-19	0.0440843	0.023	0.001	1.24444e-14
Tcp1	0	0.624863	0.873	0.456	0		Ly6a	6.54381e-33	0.816954	0.871	0.725	2.03205e-28		M6pr	1.81031e-18	0.561608	0.876	0.444	5.62155e-14		Arl4d	2.84712e-184	0.564618	0.27	0.061	8.84117e-180		Limd2	3.93374e-46	0.298763	0.955	0.716	1.22154e-41		Iqgap1	5.01329e-19	0.462952	0.624	0.351	1.55678e-14
Utp18	0	0.62047	0.631	0.172	0		Ppid	7.2497e-33	0.41284	0.803	0.436	2.25125e-28		Fam162a	1.8718e-18	0.555079	0.82	0.365	5.81251e-14		mt-Co3	5.06205e-183	0.159578	1	1	1.57192e-178		Gpsm3	4.55062e-46	0.311669	0.78	0.429	1.4131e-41		Ddit4	5.72454e-19	0.312163	0.312	0.111	1.77764e-14
Srsf6	0	0.613229	0.846	0.413	0		Naa50	7.31859e-33	0.407021	0.766	0.395	2.27264e-28		Rplp0	2.28263e-18	0.301972	1	0.999	7.08824e-14		Ptprc	1.51658e-181	0.347601	0.947	0.901	4.70943e-177		Gm26517	4.58327e-46	0.143899	0.117	0.021	1.42324e-41		Dennd4c	7.8547e-19	0.329556	0.344	0.131	2.43912e-14
Ctps	0	0.612993	0.482	0.065	0		Ppan	8.81731e-33	0.342185	0.8	0.373	2.73804e-28		Pa2g4	2.66959e-18	0.556726	0.876	0.445	8.28987e-14		Arhgef6	1.59552e-181	0.548046	0.339	0.113	4.95456e-177		Lgmn	4.96501e-46	0.071856	0.049	0.003	1.54179e-41		Pts	8.67212e-19	0.304578	0.422	0.174	2.69295e-14
Esf1	0	0.612303	0.735	0.286	0		Naf1	1.06599e-32	0.306069	0.461	0.169	3.31022e-28		Mmd	2.80918e-18	0.40909	0.551	0.171	8.72335e-14		Arhgap30	1.68663e-181	0.57823	0.526	0.314	5.2375e-177		Actb	5.04907e-46	0.319467	1	0.999	1.56789e-41		Fchsd2	1.00565e-18	0.343686	0.445	0.193	3.12283e-14
Ccdc86	0	0.605738	0.548	0.115	0		Rars	1.09193e-32	0.40041	0.698	0.338	3.39076e-28		Eif5b	3.02377e-18	0.562739	0.978	0.6	9.3897e-14		Rpl12	3.62201e-180	0.17373	1	1	1.12474e-175		Rpl41	7.73875e-46	0.22657	0.995	0.985	2.40312e-41		Zfp462	1.04188e-18	0.0187441	0.014	0	3.23536e-14
Mdn1	0	0.602132	0.537	0.127	0		Myo1e	1.17429e-32	0.2701	0.251	0.067	3.64651e-28		Pdcd1	3.93581e-18	0.393879	0.483	0.142	1.22219e-13		Jak1	7.2887e-179	0.508014	0.704	0.597	2.26336e-174		Bin2	1.93169e-45	0.280264	0.455	0.19	5.99848e-41		Tmem64	1.07111e-18	0.394399	0.505	0.25	3.32612e-14
Pus7	0	0.599843	0.444	0.05	0		Nab2	1.74539e-32	0.34697	0.566	0.234	5.41996e-28		Utp18	4.68475e-18	0.530263	0.775	0.328	1.45476e-13		mt-Nd2	8.93795e-179	0.213869	0.998	1	2.7755e-174		Rcsd1	2.01983e-45	0.312193	0.555	0.26	6.27217e-41		Sapcd1	1.08702e-18	0.0683213	0.032	0.002	3.37553e-14
Ddx10	0	0.599741	0.669	0.231	0		Mapkapk3	2.43811e-32	0.355501	0.495	0.196	7.57105e-28		Calr	5.03337e-18	0.462365	1	0.853	1.56301e-13		Atp5g2	1.22822e-178	0.427087	0.809	0.736	3.81398e-174		S100a13	2.50161e-45	0.349475	0.628	0.332	7.76825e-41		Rnasel	1.33141e-18	0.277582	0.312	0.11	4.13443e-14
Timm17a	0	0.598035	0.752	0.303	0		Pim3	4.14648e-32	0.418639	0.732	0.362	1.28761e-27		Tagap	5.30119e-18	0.613598	0.82	0.354	1.64618e-13		Asxl2	1.68098e-178	0.611823	0.369	0.149	5.21994e-174		Klhl6	2.52324e-45	0.273938	0.346	0.129	7.83543e-41		Tnfrsf25	1.51237e-18	0.462318	0.647	0.383	4.69637e-14
Nme1	0	0.595995	0.948	0.654	0		Pa2g4	6.8341e-32	0.436589	0.797	0.439	2.12219e-27		Zfp36l1	5.94044e-18	0.738249	0.899	0.565	1.84468e-13		Pde3b	2.18649e-178	0.620553	0.465	0.256	6.78972e-174		Rps15a	3.56433e-45	0.165908	1	1	1.10683e-40		Anxa5	1.56108e-18	0.244437	0.188	0.051	4.84761e-14
Gcsh	0	0.593733	0.476	0.076	0		Mrpl17	1.31332e-31	0.34178	0.583	0.248	4.07826e-27		Pcsk1	6.34455e-18	0.17912	0.112	0.011	1.97017e-13		AI467606	1.58324e-175	0.522716	0.333	0.107	4.91644e-171		Retreg1	6.40883e-45	0.320465	0.492	0.225	1.99013e-40		Cysltr1	1.5827e-18	0.221046	0.142	0.032	4.91476e-14
Csrnp1	0	0.593641	0.448	0.09	0		Txnl4a	1.6971e-31	0.380749	0.708	0.348	5.27002e-27		Nr4a1	6.91385e-18	0.567641	0.843	0.352	2.14696e-13		Tmem106b	1.29172e-174	0.53794	0.28	0.073	4.01118e-170		Aff3	7.21173e-45	0.0927053	0.058	0.005	2.23946e-40		Scp2	1.83716e-18	0.438929	0.734	0.491	5.70493e-14
Ddx27	0	0.590772	0.673	0.231	0		Ftsj3	1.86421e-31	0.367156	0.658	0.308	5.78894e-27		Grhl1	7.74688e-18	0.106933	0.09	0.007	2.40564e-13		Ptpn7	3.08052e-174	0.592326	0.457	0.239	9.56594e-170		Rps24	7.27054e-45	0.164351	1	1	2.25772e-40		Neat1	1.94407e-18	0.421072	0.427	0.192	6.03693e-14
Ak2	0	0.590645	0.778	0.362	0		Prdx1	1.89012e-31	0.414288	0.919	0.691	5.8694e-27		Ybx1	9.13152e-18	0.480111	1	0.88	2.83561e-13		Rps10	6.74411e-174	0.163259	1	1	2.09425e-169		Ncoa7	1.1715e-44	0.329472	0.21	0.061	3.63784e-40		Rcsd1	2.43886e-18	0.373943	0.55	0.273	7.5734e-14
Pabpc4	0	0.587699	0.529	0.115	0		Pum3	2.36793e-31	0.327357	0.631	0.274	7.35313e-27		Socs1	9.51959e-18	0.864154	0.82	0.434	2.95612e-13		Ostf1	3.21557e-173	0.522002	0.504	0.282	9.98532e-169		Arf5	1.21154e-44	0.349475	0.882	0.712	3.7622e-40		Pycard	2.63433e-18	0.436674	0.693	0.4	8.18037e-14
Strap	0	0.586926	0.773	0.331	0		Ahsa1	2.68515e-31	0.43726	0.824	0.478	8.33819e-27		Gtpbp4	1.03405e-17	0.539141	0.944	0.546	3.21104e-13		Cyth4	1.43056e-172	0.569466	0.397	0.176	4.44231e-168		Il7r	1.22186e-44	0.382511	0.897	0.618	3.79424e-40		Podnl1	3.78578e-18	0.30508	0.601	0.284	1.1756e-13
Pno1	0	0.586147	0.55	0.122	0		Cct2	2.94693e-31	0.411357	0.936	0.712	9.15109e-27		Atp1a1	1.03807e-17	0.5311	0.854	0.387	3.22351e-13		Uqcrh	1.47832e-172	0.358147	0.899	0.909	4.59063e-168		A430046D13Rik	3.42695e-44	0.147766	0.118	0.022	1.06417e-39		Tnik	3.92838e-18	0.396408	0.472	0.214	1.21988e-13
Wdr75	0	0.582783	0.556	0.133	0		Apex1	3.34424e-31	0.351768	0.593	0.258	1.03849e-26		Uck2	1.05358e-17	0.405943	0.584	0.198	3.27167e-13		Gabarapl2	2.39506e-172	0.46704	0.702	0.604	7.43737e-168		Nebl	4.50149e-44	0.183163	0.135	0.029	1.39785e-39		Slco3a1	4.13836e-18	0.358858	0.385	0.165	1.28509e-13
Eif3b	0	0.582132	0.701	0.259	0		Uap1	3.55633e-31	0.326193	0.383	0.136	1.10435e-26		Eif2s2	1.20449e-17	0.567385	0.966	0.692	3.7403e-13		Wipf1	2.48311e-172	0.551659	0.565	0.397	7.7108e-168		Chn2	4.65463e-44	0.283935	0.366	0.144	1.4454e-39		Cryba4	4.67329e-18	0.0315537	0.018	0.001	1.4512e-13
Gnl2	0	0.581764	0.591	0.163	0		Tomm5	3.68019e-31	0.447878	0.892	0.595	1.14281e-26		Tomm40	1.21116e-17	0.527195	0.82	0.392	3.76102e-13		Ubb	2.48858e-172	0.235652	0.996	0.997	7.7278e-168		Fau	5.30744e-44	0.175421	1	1	1.64812e-39		Fxyd5	5.15251e-18	0.414511	0.844	0.68	1.60001e-13
Chd1	0	0.577191	0.68	0.268	0		Cnbp	4.22869e-31	0.383961	0.976	0.813	1.31313e-26		Mdn1	1.32642e-17	0.513047	0.663	0.267	4.11894e-13		Lamtor4	1.72464e-169	0.551798	0.428	0.217	5.35552e-165		Arhgef1	6.04857e-44	0.314975	0.696	0.369	1.87826e-39		Ncor1	5.51502e-18	0.413762	0.853	0.673	1.71258e-13
Slc19a1	0	0.577167	0.451	0.066	0		Nifk	6.19865e-31	0.427077	0.749	0.402	1.92487e-26		Ptprs	1.66399e-17	0.332117	0.27	0.057	5.1672e-13		Arl4c	6.65535e-169	0.498702	0.466	0.214	2.06669e-164		Adk	6.8361e-44	0.202267	0.181	0.049	2.12282e-39		Edaradd	5.6694e-18	0.19696	0.147	0.034	1.76052e-13
Cct2	0	0.57458	0.931	0.605	0		Hspa4	7.11118e-31	0.419462	0.868	0.526	2.20823e-26		Psma7	1.80156e-17	0.535938	0.978	0.766	5.59439e-13		Prr13	3.09484e-168	0.518133	0.505	0.286	9.6104e-164		Rps23	9.60218e-44	0.162915	1	1	2.98177e-39		Ppib	6.79524e-18	0.360474	0.908	0.795	2.11013e-13
Npm3	0	0.574486	0.822	0.421	0		Ctps	7.64362e-31	0.347362	0.492	0.202	2.37357e-26		Atoh8	1.83656e-17	0.0520023	0.034	0.001	5.70307e-13		Dock2	6.44934e-168	0.509423	0.637	0.488	2.00271e-163		Rexo2	1.2524e-43	0.414965	0.634	0.379	3.88908e-39		Zbtb8b	6.97454e-18	0.0541677	0.032	0.002	2.1658e-13
Nfkbib	0	0.572535	0.602	0.19	0		Tnfsf11	1.56047e-30	0.421603	0.339	0.114	4.84574e-26		Mybbp1a	1.97728e-17	0.504775	0.764	0.331	6.14003e-13		Tln1	1.26223e-167	0.545359	0.546	0.357	3.91962e-163		Emp1	1.70779e-43	0.130755	0.077	0.01	5.30321e-39		Gnaq	7.63501e-18	0.205147	0.151	0.037	2.3709e-13
Mtap	0	0.572276	0.564	0.165	0		Rsl24d1	2.12493e-30	0.400109	0.732	0.383	6.59854e-26		Rhobtb1	2.04428e-17	0.0441346	0.034	0.001	6.3481e-13		Leprotl1	1.95897e-166	0.52399	0.601	0.453	6.08318e-162		Lpcat3	2.32524e-43	0.292597	0.309	0.118	7.22058e-39		Gm9889	1.01144e-17	0.049312	0.023	0.001	3.14081e-13
Stip1	0	0.571792	0.644	0.209	0		Hk2	2.39773e-30	0.216478	0.251	0.068	7.44568e-26		Ybx3	2.61106e-17	0.551624	0.685	0.27	8.10811e-13		Prkacb	2.34885e-165	0.560316	0.353	0.141	7.29389e-161		Ampd1	2.34739e-43	0.0487552	0.026	0	7.28934e-39		P3h4	1.56627e-17	0.0583956	0.041	0.003	4.86374e-13
Ahsa1	0	0.570963	0.764	0.341	0		Bzw1	2.62442e-30	0.398935	0.908	0.717	8.1496e-26		Atf3	2.62297e-17	0.703644	0.438	0.132	8.14509e-13		Gabarap	2.50134e-165	0.493341	0.642	0.533	7.76741e-161		Eif3h	3.06185e-43	0.329602	0.932	0.83	9.50795e-39		Tox2	1.65959e-17	0.0746573	0.037	0.003	5.15352e-13
Noc4l	0	0.569492	0.504	0.09	0		Slc41a1	3.28758e-30	0.363799	0.553	0.235	1.02089e-25		Spry1	2.64438e-17	0.624207	0.551	0.191	8.21158e-13		Arpc1b	3.84646e-165	0.346431	0.897	0.871	1.19444e-160		Cnn2	3.96878e-43	0.358167	0.756	0.435	1.23243e-38		Fah	1.70408e-17	0.0605694	0.037	0.003	5.29169e-13
Ftsj3	0	0.566189	0.588	0.174	0		Yrdc	4.0389e-30	0.365696	0.8	0.414	1.2542e-25		Kdm2b	2.8977e-17	0.708002	0.742	0.362	8.99824e-13		Cdc42ep3	8.61457e-165	0.552508	0.346	0.133	2.67508e-160		Rpl35	4.18392e-43	0.289853	0.988	0.921	1.29923e-38		A530021J07Rik	1.81499e-17	0.0486802	0.037	0.003	5.6361e-13
Anp32e	0	0.563464	0.735	0.306	0		Nampt	4.20188e-30	0.286195	0.376	0.131	1.30481e-25		Ifi47	3.03503e-17	0.90779	0.843	0.551	9.42469e-13		Churc1	1.25373e-164	0.532998	0.443	0.228	3.89321e-160		A530021J07Rik	5.70313e-43	0.0583011	0.034	0.001	1.77099e-38		Crip1	2.11914e-17	0.492853	0.546	0.289	6.58058e-13
Emc6	0	0.562509	0.818	0.4	0		Pim1	4.65284e-30	0.409189	0.895	0.511	1.44485e-25		Jcad	3.12211e-17	0.0626679	0.022	0	9.6951e-13		Sntb2	1.70287e-164	0.512439	0.263	0.067	5.28794e-160		Arhgef18	7.29484e-43	0.219888	0.233	0.073	2.26527e-38		Sptssa	2.30539e-17	0.396205	0.899	0.741	7.15893e-13
Srsf3	0	0.562079	0.964	0.75	0		Pusl1	5.08933e-30	0.275703	0.322	0.105	1.58039e-25		Tslp	3.16904e-17	0.027499	0.022	0	9.84082e-13		Cox8a	3.67208e-164	0.340498	0.914	0.925	1.14029e-159		Rps6	8.93523e-43	0.179952	1	0.999	2.77466e-38		F2r	2.8883e-17	0.42874	0.505	0.251	8.96903e-13
Ppat	0	0.560495	0.514	0.122	0		Gch1	5.1881e-30	0.383432	0.569	0.248	1.61106e-25		Grwd1	3.3159e-17	0.381752	0.618	0.218	1.02969e-12		Atp5h	2.29294e-163	0.324895	0.918	0.927	7.12028e-159		Clic1	1.06981e-42	0.299845	0.945	0.77	3.32208e-38		Tmem71	2.95724e-17	0.267727	0.252	0.083	9.18311e-13
U2af1	0	0.554457	0.838	0.44	0		Fbl	5.38263e-30	0.398084	0.929	0.583	1.67147e-25		Sdf2l1	3.42354e-17	0.582308	0.517	0.172	1.06311e-12		Cyba	5.72856e-163	0.333488	0.951	0.909	1.77889e-158		S1pr4	1.64541e-42	0.258738	0.37	0.146	5.1095e-38		Coro1a	3.26969e-17	0.336966	0.977	0.77	1.01534e-12
Top1	0	0.554224	0.92	0.614	0		Mak16	1.41299e-29	0.363058	0.753	0.39	4.38775e-25		Tmem176b	5.69268e-17	0.626253	0.315	0.075	1.76775e-12		Cyld	4.08244e-162	0.57047	0.434	0.229	1.26772e-157		Rps14	1.76039e-42	0.153516	1	1	5.46655e-38		Ctss	3.40194e-17	0.326844	0.294	0.112	1.0564e-12
Hnrnpa0	0	0.55418	0.974	0.754	0		Ndufaf4	1.69046e-29	0.402014	0.664	0.341	5.24938e-25		Runx2	6.29444e-17	0.168772	0.135	0.017	1.95461e-12		Ndufb10	1.63249e-161	0.488691	0.579	0.412	5.06938e-157		Rplp1	1.86396e-42	0.185351	1	1	5.78817e-38		Ccdc69	4.29205e-17	0.185094	0.17	0.045	1.33281e-12
Sar1a	0	0.553536	0.724	0.294	0		Nefh	1.72503e-29	0.300229	0.383	0.136	5.35673e-25		Stab1	6.68623e-17	0.111903	0.067	0.004	2.07628e-12		H2-Q7	1.62912e-160	0.331448	0.962	0.909	5.05891e-156		Cnp	1.8872e-42	0.272799	0.502	0.225	5.86033e-38		March3	4.42046e-17	0.0674013	0.041	0.003	1.37269e-12
Traf4	0	0.55238	0.415	0.057	0		Pfdn2	1.99268e-29	0.397821	0.929	0.649	6.18786e-25		Psme3	6.87856e-17	0.422685	0.697	0.257	2.136e-12		Bptf	5.71062e-158	0.544037	0.55	0.388	1.77332e-153		Stk38	2.17349e-42	0.292465	0.406	0.172	6.74934e-38		Dnajb14	4.89707e-17	0.16037	0.092	0.016	1.52069e-12
Gar1	0	0.551586	0.628	0.217	0		Ptprs	2.02713e-29	0.194002	0.214	0.054	6.29485e-25		Noc4l	7.24177e-17	0.430001	0.64	0.231	2.24879e-12		Sesn3	3.73439e-157	0.552929	0.422	0.221	1.15964e-152		Cd3d	3.40833e-42	0.263753	0.991	0.932	1.05839e-37		Sept9	4.90096e-17	0.353387	0.615	0.329	1.5219e-12
Atp2a2	0	0.549509	0.609	0.192	0		Phb2	2.18971e-29	0.396368	0.881	0.563	6.7997e-25		Pgam1	7.37597e-17	0.540317	0.944	0.508	2.29046e-12		Ccr9	6.59171e-157	0.724041	0.338	0.129	2.04692e-152		Eef1b2	3.6012e-42	0.208492	0.998	0.992	1.11828e-37		Lpcat3	5.01889e-17	0.330381	0.317	0.126	1.55852e-12
Timm9	0	0.549328	0.616	0.199	0		Cinp	2.54756e-29	0.259786	0.407	0.148	7.91094e-25		Camk2n1	9.35533e-17	0.205491	0.146	0.02	2.90511e-12		Maf	1.41263e-155	0.559626	0.492	0.273	4.38665e-151		Gtf2ird1	5.07503e-42	0.0665947	0.048	0.004	1.57595e-37		Pkn1	5.75843e-17	0.327111	0.546	0.267	1.78816e-12
Cnbp	0	0.548	0.975	0.734	0		Ak6	2.77179e-29	0.314329	0.512	0.215	8.60724e-25		Srsf2	1.09227e-16	0.547886	0.955	0.688	3.39182e-12		2810474O19Rik	1.22351e-154	0.557203	0.496	0.288	3.79935e-150		Faah	6.0829e-42	0.277625	0.366	0.147	1.88892e-37		Ankrd44	6.52731e-17	0.344373	0.661	0.36	2.02693e-12
Atad3a	0	0.547821	0.45	0.084	0		Pcbp1	3.03552e-29	0.386274	0.915	0.616	9.42619e-25		Ptges3	1.09738e-16	0.55259	0.944	0.579	3.4077e-12		Pkn1	1.64925e-154	0.521134	0.371	0.163	5.12141e-150		Pts	6.1647e-42	0.234986	0.401	0.164	1.91432e-37		AB124611	7.39087e-17	0.180527	0.165	0.043	2.29509e-12
Dnajb9	0	0.545077	0.49	0.121	0		1110032F04Rik	3.41708e-29	0.0819258	0.068	0.007	1.06111e-24		Phactr2	1.12895e-16	0.287997	0.303	0.07	3.50574e-12		Arhgap18	9.11428e-154	0.498495	0.277	0.085	2.83026e-149		9930111J21Rik2	8.21084e-42	0.287005	0.524	0.242	2.54971e-37		Cchcr1	8.19476e-17	0.127394	0.078	0.012	2.54472e-12
Wdr12	0	0.542854	0.512	0.125	0		Eif1ax	3.50917e-29	0.391146	0.841	0.488	1.0897e-24		Set	1.17214e-16	0.520036	0.989	0.819	3.63984e-12		Cdkn1b	1.83028e-153	0.509601	0.313	0.109	5.68357e-149		Gnb2	2.34437e-41	0.312759	0.762	0.457	7.27998e-37		Xkrx	8.20313e-17	0.143381	0.069	0.01	2.54732e-12
Slc29a1	0	0.536758	0.439	0.083	0		Rps26	3.85603e-29	0.263174	1	0.978	1.19741e-24		Smyd2	1.20429e-16	0.421936	0.427	0.127	3.73967e-12		Mndal	3.21483e-153	0.43323	0.598	0.402	9.98302e-149		Arhgap45	2.66786e-41	0.273121	0.799	0.438	8.28451e-37		Lxn	8.6012e-17	0.209756	0.142	0.034	2.67093e-12
Grwd1	0	0.533557	0.468	0.09	0		Hnrnpu	4.50479e-29	0.35696	0.986	0.817	1.39887e-24		Kpnb1	1.24419e-16	0.485983	0.753	0.333	3.8636e-12		Paip2	1.03707e-152	0.496049	0.575	0.437	3.22041e-148		Pag1	4.35844e-41	0.265228	0.384	0.158	1.35343e-36		Rps5	1.03517e-16	0.177654	1	1	3.2145e-12
Ube2s	0	0.525057	0.846	0.455	0		Eef1g	6.89746e-29	0.304728	1	0.929	2.14187e-24		Ube2l6	1.29469e-16	0.0641814	0.056	0.003	4.02041e-12		Rps13	2.55716e-152	0.154699	1	1	7.94074e-148		Hexb	4.41961e-41	0.183379	0.183	0.05	1.37242e-36		Cyth4	1.03962e-16	0.322459	0.56	0.286	3.22835e-12
Snrpb	0	0.524315	0.952	0.697	0		Rbpj	1.03193e-28	0.40937	0.739	0.384	3.20445e-24		Rcl1	1.89872e-16	0.459246	0.64	0.249	5.8961e-12		Tpt1	2.11144e-151	0.117085	1	1	6.55667e-147		Cyb5a	6.2912e-41	0.239451	0.476	0.21	1.95361e-36		Sit1	1.29508e-16	0.266601	0.303	0.111	4.02161e-12
Uck2	0	0.523082	0.435	0.077	0		Eif6	1.23208e-28	0.408846	0.834	0.514	3.82597e-24		Pno1	2.03699e-16	0.428421	0.674	0.267	6.32547e-12		Lamtor2	5.31526e-151	0.510591	0.506	0.333	1.65055e-146		Ten1	9.51371e-41	0.228511	0.343	0.133	2.95429e-36		Arf5	1.42786e-16	0.374414	0.853	0.721	4.43394e-12
Timm10	0	0.521539	0.546	0.151	0		Nsun2	1.28942e-28	0.394419	0.719	0.381	4.00402e-24		Cflar	2.18351e-16	0.590051	0.798	0.419	6.78045e-12		Ifi209	7.5666e-151	0.497374	0.325	0.119	2.34966e-146		Gsn	1.12613e-40	0.0942269	0.08	0.012	3.49697e-36		Nqo2	1.45173e-16	0.100006	0.087	0.015	4.50807e-12
Mrps6	0	0.517332	0.524	0.146	0		Slc1a5	1.37075e-28	0.381138	0.725	0.376	4.25658e-24		Pdia6	2.62728e-16	0.609948	0.978	0.62	8.15849e-12		Chd2	2.24916e-150	0.570895	0.41	0.209	6.98431e-146		Anxa2	1.87367e-40	0.262207	0.151	0.038	5.81829e-36		Gmfg	1.68697e-16	0.331424	0.835	0.582	5.23853e-12
Shmt1	0	0.515122	0.374	0.041	0		Nfix	1.41073e-28	0.13654	0.136	0.025	4.38074e-24		Ftsj3	2.73756e-16	0.488905	0.742	0.315	8.50095e-12		Slc9a3r1	9.86761e-150	0.522934	0.431	0.234	3.06419e-145		Tmsb4x	2.08556e-40	0.290257	0.998	0.999	6.47628e-36		Matn2	1.81848e-16	0.084059	0.037	0.003	5.64691e-12
Mapk6	0	0.51037	0.439	0.1	0		Eif3j1	1.69754e-28	0.350578	0.624	0.293	5.27137e-24		Ddx56	3.09982e-16	0.358693	0.494	0.154	9.62586e-12		Crebrf	3.40349e-149	0.470968	0.228	0.051	1.05688e-144		1500009L16Rik	2.26834e-40	0.0827075	0.049	0.004	7.04388e-36		Gtf2ird1	2.21879e-16	0.0647259	0.05	0.005	6.89001e-12
Nop16	0	0.505018	0.458	0.098	0		Hif1a	2.83149e-28	0.429005	0.729	0.391	8.79261e-24		Arhgef3	3.97469e-16	0.662179	0.697	0.325	1.23426e-11		Ube2h	1.20504e-148	0.533578	0.367	0.169	3.74202e-144		Kcnn2	2.30739e-40	0.0506898	0.025	0	7.16513e-36		Ift81	2.41912e-16	0.0665155	0.046	0.005	7.51208e-12
Ell2	0	0.500455	0.311	0.032	0		G3bp1	2.96406e-28	0.346108	0.969	0.715	9.20428e-24		Serbp1	4.10567e-16	0.436271	1	0.899	1.27493e-11		Rasal3	8.40699e-148	0.51485	0.366	0.166	2.61062e-143		Cd27	3.49578e-40	0.319412	0.682	0.388	1.08554e-35		Nfatc3	2.43913e-16	0.383351	0.482	0.236	7.57422e-12
Slc16a1	0	0.496633	0.409	0.076	0		Rnf19a	3.5734e-28	0.30524	0.376	0.137	1.10965e-23		Rrp9	5.91024e-16	0.447592	0.742	0.303	1.83531e-11		Socs2	2.12727e-147	0.549624	0.242	0.062	6.6058e-143		Tmem14c	4.68335e-40	0.318091	0.654	0.369	1.45432e-35		Elk3	3.05513e-16	0.262424	0.22	0.072	9.48711e-12
Naf1	0	0.491488	0.394	0.061	0		Kras	3.76919e-28	0.448415	0.729	0.398	1.17045e-23		Ppif	6.45985e-16	0.617956	0.573	0.211	2.00598e-11		Gimap8	2.13567e-147	0.549733	0.481	0.301	6.63191e-143		Capn2	1.0474e-39	0.184528	0.2	0.059	3.2525e-35		Rnf166	3.11314e-16	0.369574	0.505	0.247	9.66724e-12
Sdad1	0	0.486831	0.472	0.118	0		Noc3l	6.10098e-28	0.295631	0.461	0.186	1.89454e-23		Odc1	6.84079e-16	0.606693	0.91	0.466	2.12427e-11		Arpc5l	1.54321e-146	0.509428	0.527	0.37	4.79213e-142		Qpct	2.86336e-39	0.272837	0.313	0.122	8.89158e-35		Arl6ip1	3.26414e-16	0.376157	0.789	0.589	1.01361e-11
Pwp1	0	0.483751	0.473	0.117	0		Psma4	6.4461e-28	0.396768	0.861	0.571	2.00171e-23		Timm10	7.66936e-16	0.438654	0.719	0.285	2.38157e-11		Prdx5	8.57459e-146	0.484052	0.575	0.437	2.66267e-141		Rps28	3.82323e-39	0.266527	0.975	0.921	1.18723e-34		St3gal6	3.30739e-16	0.315192	0.468	0.215	1.02704e-11
Epop	0	0.480173	0.378	0.058	0		Zmynd19	9.89947e-28	0.260961	0.42	0.16	3.07408e-23		Igtp	8.57603e-16	0.809435	0.753	0.364	2.66311e-11		mt-Co2	3.18081e-144	0.143129	1	1	9.87738e-140		Cfl1	5.09414e-39	0.270946	0.983	0.942	1.58188e-34		Spn	4.11763e-16	0.348638	0.445	0.208	1.27865e-11
Noc3l	0	0.469	0.405	0.082	0		Abce1	1.02093e-27	0.332403	0.644	0.31	3.17029e-23		Cdkn1a	9.17425e-16	0.510526	0.157	0.024	2.84888e-11		Stk4	8.19766e-144	0.506427	0.454	0.266	2.54562e-139		Fam3c	8.15909e-39	0.287618	0.404	0.179	2.53364e-34		Crtc3	4.32953e-16	0.338011	0.482	0.236	1.34445e-11
Sult2b1	0	0.468451	0.275	0.016	0		Oaf	1.44039e-27	0.109516	0.061	0.006	4.47286e-23		Ccr6	9.40264e-16	0.10582	0.056	0.003	2.9198e-11		Sh2d3c	8.47915e-144	0.467279	0.253	0.072	2.63303e-139		Cmc1	8.27903e-39	0.251627	0.449	0.202	2.57089e-34		Ppm1k	5.41311e-16	0.304829	0.229	0.077	1.68093e-11
Atp5b	0	0.463897	0.975	0.794	0		Top1	1.52458e-27	0.412752	0.953	0.714	4.73429e-23		Utp14a	1.004e-15	0.47784	0.674	0.287	3.11773e-11		Park7	1.47163e-143	0.41151	0.67	0.53	4.56984e-139		Nav2	1.01817e-38	0.148809	0.114	0.024	3.16172e-34		Cdkn2d	6.00097e-16	0.291254	0.284	0.105	1.86348e-11
Dimt1	0	0.46272	0.434	0.09	0		Mrpl12	1.58901e-27	0.387201	0.803	0.459	4.93436e-23		Pon3	1.04852e-15	0.0538286	0.045	0.002	3.25597e-11		Foxn3	1.65442e-143	0.539274	0.504	0.327	5.13746e-139		Gm34006	1.21335e-38	0.130224	0.112	0.023	3.76781e-34		Osbpl3	6.04868e-16	0.262334	0.202	0.062	1.8783e-11
Rps17	0	0.453469	0.994	0.905	0		M6pr	1.8697e-27	0.383785	0.773	0.438	5.80598e-23		Psma4	1.15204e-15	0.516434	0.944	0.577	3.57742e-11		Nsd1	1.02785e-142	0.52572	0.502	0.339	3.19179e-138		Rsrp1	1.48886e-38	0.309845	0.942	0.752	4.62335e-34		Ptpra	6.70689e-16	0.323904	0.362	0.154	2.08269e-11
Slc25a33	0	0.444788	0.351	0.047	0		Larp1b	2.08364e-27	0.264633	0.359	0.129	6.47032e-23		Ppp1r14b	1.15424e-15	0.502309	0.989	0.711	3.58425e-11		Rnf166	3.91305e-142	0.501881	0.346	0.149	1.21512e-137		Churc1	1.85542e-38	0.297018	0.61	0.322	5.76163e-34		Arhgap45	8.57832e-16	0.332768	0.78	0.454	2.66383e-11
Nop2	0	0.442929	0.375	0.068	0		Rps27l	2.15465e-27	0.410555	0.864	0.584	6.69082e-23		Ptma	1.23069e-15	0.413383	1	0.996	3.82167e-11		Rpl3	2.99024e-141	0.175113	0.998	0.999	9.28559e-137		Ifi209	4.64012e-38	0.266423	0.462	0.211	1.4409e-33		Cib2	8.99901e-16	0.0386768	0.028	0.002	2.79446e-11
Eif1	0	0.405006	0.999	0.995	0		Morf4l2	2.28496e-27	0.348005	0.661	0.326	7.09548e-23		Slc1a5	1.471e-15	0.571907	0.775	0.383	4.56789e-11		Itm2c	1.49082e-140	0.518896	0.527	0.372	4.62943e-136		Acp5	6.99455e-38	0.252579	0.585	0.285	2.17202e-33		Adgrg5	9.44287e-16	0.249715	0.202	0.062	2.93229e-11
Mfsd2a	0	0.376373	0.25	0.013	0		Adamts6	3.74825e-27	0.143882	0.142	0.029	1.16394e-22		Chka	1.51858e-15	0.343365	0.315	0.079	4.71563e-11		St6galnac3	1.52373e-140	0.523401	0.354	0.161	4.73165e-136		Cast	1.93353e-37	0.29076	0.508	0.253	6.0042e-33		Plekhb2	1.01761e-15	0.311246	0.239	0.085	3.15997e-11
Hdgf	1.90093e-306	0.556308	0.771	0.359	5.90295e-302		Capg	5.34691e-27	0.26734	0.261	0.079	1.66038e-22		Mif	1.57511e-15	0.490839	1	0.67	4.89118e-11		Art2b	3.25449e-140	0.480537	0.576	0.406	1.01062e-135		Def6	2.58826e-37	0.231181	0.439	0.194	8.03733e-33		Appl2	1.04512e-15	0.17165	0.124	0.028	3.24541e-11
Eif3c	2.07365e-306	0.524341	0.884	0.527	6.43931e-302		Gcsh	5.50674e-27	0.335015	0.481	0.207	1.71001e-22		Piezo1	1.67122e-15	0.238215	0.27	0.06	5.18965e-11		Cnp	1.38462e-139	0.480998	0.337	0.139	4.29965e-135		Gm19705	5.87653e-37	0.107718	0.08	0.013	1.82484e-32		Serinc3	1.21304e-15	0.368659	0.812	0.547	3.76684e-11
Snrpf	4.40221e-306	0.503955	0.914	0.612	1.36702e-301		Rpl35	6.2449e-27	0.295905	0.997	0.923	1.93923e-22		Polr1d	1.7744e-15	0.456676	0.966	0.787	5.51003e-11		Zmynd8	1.9962e-139	0.49934	0.297	0.11	6.1988e-135		Tex264	6.18806e-37	0.225739	0.29	0.112	1.92158e-32		2810459M11Rik	1.22597e-15	0.0260078	0.014	0	3.80699e-11
Rcc2	1.14428e-305	0.550189	0.706	0.293	3.55333e-301		Dnttip2	7.17491e-27	0.382908	0.8	0.461	2.22802e-22		U2af1	1.97481e-15	0.48059	0.966	0.575	6.13237e-11		Itgb7	3.28469e-139	0.381412	0.535	0.304	1.02e-134		Fut7	1.03675e-36	0.0511896	0.035	0.002	3.21942e-32		Cox7a1	1.23718e-15	0.0224884	0.014	0	3.84183e-11
Zeb2	1.37269e-305	0.421966	0.236	0.011	4.26263e-301		Sox4	7.71878e-27	0.209197	0.132	0.026	2.39691e-22		Ramp3	2.37044e-15	0.609034	0.247	0.055	7.36093e-11		Zfp292	6.14105e-139	0.544738	0.502	0.334	1.90698e-134		1110034G24Rik	1.33474e-36	0.213383	0.203	0.065	4.14478e-32		Pacsin3	1.24283e-15	0.0235617	0.014	0	3.85936e-11
Rbbp7	1.26094e-303	0.553436	0.699	0.293	3.91559e-299		Grwd1	9.32269e-27	0.308153	0.495	0.213	2.89498e-22		Phf5a	2.41113e-15	0.424468	0.865	0.412	7.48727e-11		Tacc1	6.80566e-139	0.532469	0.411	0.225	2.11336e-134		Pik3ip1	1.69437e-36	0.204731	0.27	0.098	5.26153e-32		Dhrs7	1.25291e-15	0.202833	0.248	0.084	3.89065e-11
Ifrd2	3.33775e-301	0.42553	0.361	0.065	1.03647e-296		Dnajc2	9.45514e-27	0.367731	0.742	0.399	2.93611e-22		Arhgap5	2.61185e-15	0.293851	0.337	0.087	8.11059e-11		Hadhb	8.7685e-139	0.491064	0.376	0.18	2.72288e-134		Sp3os	2.02438e-36	0.158798	0.16	0.044	6.28631e-32		Myl12b	1.45148e-15	0.326052	0.89	0.766	4.50727e-11
Cebpz	5.07877e-299	0.520577	0.667	0.254	1.57711e-294		Pus7	9.79001e-27	0.280393	0.444	0.179	3.04009e-22		Laptm4b	3.13624e-15	0.077404	0.067	0.005	9.73896e-11		Bnip3l	1.15766e-138	0.508114	0.395	0.209	3.59487e-134		Nme4	2.25108e-36	0.0539892	0.043	0.003	6.99029e-32		Rnh1	1.76652e-15	0.352796	0.45	0.229	5.48557e-11
Tuba1c	7.63605e-299	0.470016	0.4	0.085	2.37122e-294		Stx6	1.00131e-26	0.343616	0.661	0.323	3.10937e-22		Apex1	3.18235e-15	0.414335	0.674	0.264	9.88214e-11		Unc119	1.40461e-136	0.480271	0.296	0.112	4.36173e-132		2810001G20Rik	2.89571e-36	0.244344	0.318	0.127	8.99205e-32		Esyt1	1.9924e-15	0.373864	0.431	0.211	6.18701e-11
Nefh	1.95673e-297	0.490731	0.32	0.048	6.07623e-293		Izumo1r	1.25416e-26	0.454098	0.461	0.197	3.89454e-22		Snrpd1	3.72148e-15	0.488579	0.944	0.588	1.15563e-10		AY036118	1.53494e-136	0.319929	0.926	0.948	4.76646e-132		Scamp3	2.9776e-36	0.260803	0.475	0.227	9.24633e-32		Sh3glb2	2.44417e-15	0.214781	0.229	0.077	7.5899e-11
Bzw1	2.48525e-297	0.496654	0.928	0.612	7.71743e-293		Iigp1	1.47382e-26	0.581443	0.237	0.07	4.57664e-22		Pus7	3.93827e-15	0.346467	0.528	0.184	1.22295e-10		Tmem154	1.60199e-136	0.450028	0.234	0.062	4.97465e-132		Tnrc6b	3.35144e-36	0.266773	0.591	0.3	1.04072e-31		Mgat5	2.82647e-15	0.29042	0.284	0.11	8.77704e-11
Zc3h15	6.40829e-296	0.544415	0.772	0.372	1.98997e-291		Batf	1.96991e-26	0.369187	0.644	0.322	6.11715e-22		Ipo7	4.37511e-15	0.376222	0.629	0.233	1.3586e-10		Klrk1	6.87128e-136	0.761744	0.366	0.162	2.13374e-131		Cdkn1b	3.65739e-36	0.251782	0.444	0.2	1.13573e-31		Ikzf2	3.16297e-15	0.369609	0.601	0.323	9.82196e-11
Rars	6.93836e-295	0.493723	0.605	0.211	2.15457e-290		Sigmar1	3.23896e-26	0.224212	0.386	0.143	1.00579e-21		Ydjc	4.44123e-15	0.290877	0.281	0.067	1.37914e-10		Ndufa13	8.44004e-136	0.365797	0.786	0.753	2.62089e-131		Bcl9l	3.80178e-36	0.175978	0.18	0.053	1.18057e-31		Fam160a2	4.43905e-15	0.213834	0.197	0.061	1.37846e-10
Mak16	2.80033e-294	0.52435	0.663	0.261	8.69587e-290		Ddx27	3.53464e-26	0.381326	0.702	0.376	1.09761e-21		Abce1	4.52806e-15	0.416878	0.753	0.316	1.4061e-10		Fgl2	3.30508e-135	0.473655	0.171	0.023	1.02633e-130		Reep5	5.09892e-36	0.338568	0.501	0.268	1.58337e-31		Rps6ka5	4.51374e-15	0.128774	0.101	0.021	1.40165e-10
Hccs	2.31389e-293	0.454958	0.389	0.081	7.18532e-289		Wdr75	3.61705e-26	0.308693	0.58	0.271	1.1232e-21		Slc5a3	4.6075e-15	0.325997	0.438	0.136	1.43077e-10		Nedd4	3.59086e-135	0.541842	0.42	0.244	1.11507e-130		Gm37065	6.58437e-36	0.114416	0.072	0.011	2.04464e-31		Eif4e3	4.93979e-15	0.193938	0.17	0.049	1.53395e-10
Sfpq	3.21692e-293	0.519579	0.902	0.547	9.98951e-289		Ak7	3.91407e-26	0.102287	0.088	0.013	1.21544e-21		Noc2l	5.43768e-15	0.436825	0.809	0.364	1.68856e-10		Zc3hav1	3.35018e-133	0.510254	0.44	0.259	1.04033e-128		Tmc6	1.04942e-35	0.166015	0.206	0.066	3.25878e-31		Slfn5	5.23984e-15	0.23744	0.248	0.089	1.62713e-10
Rps27l	3.40906e-293	0.53744	0.835	0.462	1.05861e-288		Prelid3b	4.71062e-26	0.259823	0.502	0.21	1.46279e-21		Ltb	5.4908e-15	0.663561	1	0.883	1.70506e-10		Gm14029	1.04115e-131	0.401164	0.173	0.026	3.23307e-127		Cnpy2	1.53129e-35	0.242365	0.493	0.238	4.75511e-31		Kcnmb4	7.09999e-15	0.147575	0.092	0.018	2.20476e-10
Zfp593	4.28635e-289	0.475358	0.541	0.17	1.33104e-284		Dot1l	5.02051e-26	0.286103	0.427	0.171	1.55902e-21		Rrp1b	6.37759e-15	0.453446	0.708	0.3	1.98043e-10		AC163354.1	1.77648e-131	0.508287	0.239	0.068	5.51651e-127		Bad	1.92959e-35	0.147047	0.184	0.056	5.99195e-31		Uvssa	7.23722e-15	0.254966	0.22	0.074	2.24737e-10
Morf4l2	3.21991e-288	0.511877	0.584	0.203	9.99878e-284		Eif3a	5.18756e-26	0.362457	0.959	0.748	1.61089e-21		Dnajb11	7.03222e-15	0.599264	0.831	0.442	2.18372e-10		Fam111a	1.70552e-130	0.407612	0.188	0.035	5.29616e-126		Rpa1	3.62398e-35	0.209621	0.247	0.089	1.12536e-30		Kbtbd11	9.28035e-15	0.292908	0.422	0.197	2.88183e-10
Serpina3g	2.69379e-287	1.20158	0.58	0.25	8.36501e-283		Gramd1b	6.67857e-26	0.356595	0.59	0.284	2.0739e-21		Top1	7.95381e-15	0.564491	0.955	0.719	2.4699e-10		Rab37	6.51465e-130	0.489667	0.306	0.125	2.02299e-125		Fchsd2	3.76749e-35	0.230656	0.412	0.183	1.16992e-30		H2-M5	9.30165e-15	0.0401767	0.018	0.001	2.88844e-10
Slc7a1	2.13306e-286	0.470459	0.395	0.088	6.62378e-282		Timm17a	6.71744e-26	0.365692	0.793	0.45	2.08597e-21		Eif3a	7.99024e-15	0.489131	0.989	0.752	2.48121e-10		Rps15a	3.20297e-129	0.146602	1	1	9.94619e-125		Arhgap15	4.49231e-35	0.295376	0.733	0.444	1.395e-30		St3gal3	9.47887e-15	0.0708952	0.046	0.005	2.94347e-10
Znhit6	2.33313e-286	0.454994	0.464	0.125	7.24506e-282		Fam98a	7.1034e-26	0.211422	0.308	0.103	2.20582e-21		Isy1	8.61473e-15	0.440354	0.787	0.355	2.67513e-10		Pglyrp2	4.34235e-129	0.451431	0.319	0.134	1.34843e-124		Sdhaf4	6.53211e-35	0.190232	0.338	0.138	2.02842e-30		Cnn2	1.01655e-14	0.341564	0.725	0.45	3.15668e-10
Aen	1.44032e-284	0.429521	0.425	0.103	4.47263e-280		U2af1	9.02022e-26	0.371307	0.854	0.571	2.80105e-21		Pin1	1.10505e-14	0.50375	0.753	0.361	3.43152e-10		Sept9	8.24171e-129	0.495281	0.421	0.24	2.5593e-124		Adcy6	1.04246e-34	0.0628677	0.038	0.003	3.23714e-30		Smap1	1.07027e-14	0.329633	0.578	0.323	3.32352e-10
Mrpl12	2.53201e-283	0.511351	0.735	0.327	7.86264e-279		Thop1	9.49404e-26	0.189131	0.231	0.066	2.94818e-21		Aebp2	1.11546e-14	0.468851	0.831	0.394	3.46384e-10		Sytl2	1.63326e-128	0.427243	0.186	0.035	5.07178e-124		Wfikkn2	1.04264e-34	0.0843935	0.061	0.008	3.23771e-30		AC149090.1	1.15545e-14	0.353307	0.404	0.195	3.58803e-10
Slc25a5	2.5852e-281	0.463614	0.962	0.771	8.02781e-277		Alcam	1.1161e-25	0.168955	0.108	0.019	3.46584e-21		Emc6	1.1616e-14	0.491175	0.91	0.543	3.60712e-10		Rp9	1.73148e-128	0.490647	0.507	0.361	5.37676e-124		Izumo1r	1.49762e-34	0.559775	0.381	0.192	4.65057e-30		Tbc1d10c	1.44365e-14	0.359738	0.55	0.301	4.48295e-10
Ivns1abp	2.99836e-281	0.486068	0.598	0.211	9.31082e-277		Rpf2	1.8634e-25	0.295266	0.519	0.233	5.78642e-21		Sub1	1.19363e-14	0.489806	1	0.951	3.70657e-10		Elf1	8.44539e-128	0.491172	0.543	0.4	2.62255e-123		Mbd2	1.50847e-34	0.295613	0.702	0.43	4.68425e-30		Plp2	1.57039e-14	0.104424	0.064	0.01	4.87653e-10
Gimap5	1.15402e-280	0.580866	0.902	0.602	3.58359e-276		Kcnq1ot1	2.01482e-25	0.468046	0.908	0.665	6.25663e-21		Tnfaip3	1.19518e-14	0.535129	0.674	0.305	3.7114e-10		Klrd1	1.72048e-127	0.781334	0.331	0.143	5.3426e-123		Fcrl1	1.51619e-34	0.0685066	0.04	0.003	4.70822e-30		Pten	1.82192e-14	0.346637	0.564	0.322	5.65762e-10
Gabpb1	2.76058e-280	0.450117	0.426	0.104	8.57244e-276		Gnl2	2.28143e-25	0.303467	0.627	0.303	7.08451e-21		Naa50	1.45736e-14	0.449139	0.865	0.402	4.52553e-10		Tnk2	2.14126e-127	0.419832	0.214	0.054	6.64927e-123		Wdr26	1.59381e-34	0.330183	0.573	0.327	4.94925e-30		Pqlc3	1.85723e-14	0.143195	0.096	0.02	5.76724e-10
Cluh	1.15825e-278	0.395217	0.343	0.062	3.59671e-274		Gpatch4	2.35077e-25	0.322053	0.515	0.238	7.29985e-21		Ebna1bp2	1.95979e-14	0.479089	0.933	0.518	6.08574e-10		Myl6	3.33534e-127	0.24424	0.966	0.976	1.03572e-122		Tuba1a	1.61624e-34	0.255184	0.335	0.144	5.01891e-30		Srgap3	2.0668e-14	0.142706	0.087	0.017	6.41804e-10
Polr1c	9.22316e-278	0.459426	0.554	0.18	2.86407e-273		Psme3	2.58327e-25	0.285979	0.553	0.252	8.02183e-21		Fam78b	2.04896e-14	0.178137	0.101	0.011	6.36263e-10		Sema4a	1.04202e-126	0.437309	0.24	0.072	3.2358e-122		Cib1	1.93291e-34	0.235663	0.419	0.195	6.00226e-30		Gm26786	2.35002e-14	0.0275098	0.009	0	7.29753e-10
Gspt1	1.41479e-277	0.507344	0.766	0.364	4.39334e-273		Lgals1	3.07138e-25	0.473874	0.444	0.19	9.53754e-21		Riox2	2.37624e-14	0.392265	0.461	0.155	7.37893e-10		Twf2	1.58683e-126	0.472385	0.332	0.151	4.92757e-122		Tktl1	1.98535e-34	0.108649	0.084	0.015	6.1651e-30		Colgalt2	2.35002e-14	0.0227282	0.009	0	7.29753e-10
Ftl1	1.68724e-277	0.413315	0.989	0.926	5.23937e-273		Polr2h	3.26223e-25	0.315468	0.634	0.315	1.01302e-20		Timm8a1	2.49902e-14	0.4939	0.742	0.352	7.76021e-10		Tbc1d1	6.07948e-126	0.473724	0.324	0.144	1.88786e-121		Spn	2.27869e-34	0.239988	0.429	0.198	7.07601e-30		Spon2	2.35002e-14	0.0170544	0.009	0	7.29753e-10
Wdr18	1.09622e-276	0.452363	0.546	0.177	3.4041e-272		Naa15	4.07314e-25	0.309414	0.732	0.38	1.26483e-20		Anp32b	2.63905e-14	0.513538	0.978	0.724	8.19503e-10		H2-Q4	1.77209e-125	0.506927	0.39	0.219	5.50289e-121		Rpl35a	2.58352e-34	0.162828	1	0.998	8.0226e-30		Mapk10	2.36452e-14	0.0178799	0.009	0	7.34254e-10
Pin1	2.8512e-275	0.472643	0.616	0.23	8.85382e-271		Manf	4.14177e-25	0.42833	0.858	0.598	1.28614e-20		Dnajc2	2.8093e-14	0.482697	0.798	0.406	8.72373e-10		Mmp9	1.84123e-125	0.480623	0.146	0.015	5.71758e-121		Eif3f	3.06373e-34	0.267813	0.934	0.805	9.51381e-30		Zfhx2	2.54796e-14	0.245606	0.239	0.086	7.91219e-10
Stx6	9.81521e-275	0.486969	0.576	0.203	3.04792e-270		Dctpp1	4.26194e-25	0.289588	0.502	0.222	1.32346e-20		Baz1a	2.93062e-14	0.460298	0.787	0.385	9.10047e-10		Clta	3.23402e-125	0.385826	0.725	0.718	1.00426e-120		H2afz	4.27203e-34	0.365824	0.874	0.684	1.32659e-29		Fos	2.75673e-14	0.284483	0.349	0.154	8.56048e-10
Nab2	1.13588e-274	0.550174	0.457	0.13	3.52724e-270		Pou2f2	5.28416e-25	0.457436	0.481	0.221	1.64089e-20		Ppp1r16b	3.25339e-14	0.530029	0.742	0.354	1.01028e-09		Rps5	4.60298e-124	0.150326	1	1	1.42936e-119		Ptms	8.20263e-34	0.149767	0.112	0.026	2.54716e-29		Rpl30	2.96568e-14	0.163114	1	1	9.20932e-10
Impdh2	5.94277e-274	0.484497	0.6	0.218	1.84541e-269		Utp14a	7.45447e-25	0.295095	0.593	0.281	2.31484e-20		Heatr1	3.37742e-14	0.353207	0.539	0.193	1.04879e-09		Tnrc6c	1.52322e-123	0.488621	0.417	0.249	4.73005e-119		Abhd8	1.03881e-33	0.223747	0.531	0.258	3.2258e-29		Klhl6	3.46327e-14	0.232927	0.335	0.139	1.07545e-09
Pvt1	2.84035e-273	0.385936	0.304	0.047	8.82014e-269		Agpat4	8.86444e-25	0.226825	0.149	0.034	2.75268e-20		Sdad1	3.58492e-14	0.450684	0.584	0.238	1.11322e-09		Def6	2.15092e-123	0.446405	0.294	0.117	6.67924e-119		Rpl36a	1.08685e-33	0.232172	0.992	0.958	3.375e-29		Aes	3.62151e-14	0.288166	0.89	0.649	1.12459e-09
Eif6	5.65765e-273	0.511532	0.773	0.39	1.75687e-268		Ubxn2a	1.08929e-24	0.348018	0.512	0.232	3.38259e-20		Irgm1	3.88656e-14	0.657015	0.596	0.249	1.20689e-09		Sorl1	2.17679e-123	0.428406	0.211	0.055	6.75958e-119		Rpl22l1	1.49911e-33	0.28603	0.962	0.861	4.6552e-29		Tdrkh	3.65439e-14	0.12779	0.073	0.013	1.1348e-09
Erh	2.58016e-272	0.49613	0.642	0.255	8.01216e-268		Ywhag	1.10835e-24	0.285938	0.573	0.263	3.44176e-20		Nampt	3.96319e-14	0.346128	0.427	0.135	1.23069e-09		Slc38a2	2.42564e-123	0.519816	0.593	0.502	7.53233e-119		Tgfbr3	1.62679e-33	0.0667208	0.045	0.004	5.05166e-29		Golm1	3.66403e-14	0.219062	0.161	0.047	1.13779e-09
Rpf2	4.57824e-272	0.438269	0.456	0.127	1.42168e-267		Fjx1	1.11287e-24	0.0562404	0.041	0.003	3.4558e-20		Hnrnpab	4.18885e-14	0.465081	0.989	0.627	1.30076e-09		Slc50a1	3.27491e-123	0.489412	0.382	0.212	1.01696e-118		Park7	1.63109e-33	0.277722	0.842	0.587	5.06503e-29		S100a13	3.73269e-14	0.338844	0.592	0.346	1.15911e-09
Pfdn4	2.50503e-271	0.471556	0.612	0.229	7.77886e-267		Phf6	1.16952e-24	0.26699	0.424	0.171	3.63171e-20		D8Ertd738e	4.19301e-14	0.43441	0.978	0.656	1.30206e-09		Itga1	7.13978e-123	0.373288	0.125	0.006	2.21712e-118		Ech1	2.0073e-33	0.218685	0.419	0.191	6.23327e-29		Tmem50a	3.76523e-14	0.309536	0.711	0.438	1.16922e-09
Slc3a2	9.14912e-271	0.522304	0.802	0.416	2.84108e-266		Nol10	1.58868e-24	0.258649	0.356	0.134	4.93332e-20		Tnf	4.23325e-14	0.0471257	0.865	0.392	1.31455e-09		Myo1f	9.228e-123	0.383075	0.184	0.037	2.86557e-118		Lxn	2.09928e-33	0.13276	0.124	0.031	6.5189e-29		Fli1	4.06419e-14	0.273421	0.5	0.253	1.26205e-09
Aatf	1.79734e-269	0.44783	0.488	0.145	5.58127e-265		Pwp1	1.68644e-24	0.27062	0.525	0.233	5.2369e-20		Tcp1	4.26729e-14	0.459458	0.921	0.598	1.32512e-09		Tespa1	2.33958e-122	0.356689	0.705	0.601	7.26508e-118		Phf11a	2.1865e-33	0.103839	0.08	0.014	6.78974e-29		Fbxl12os	4.58891e-14	0.105467	0.055	0.008	1.42499e-09
Plk3	3.5736e-269	0.488861	0.337	0.065	1.10971e-264		Smarcc1	2.14698e-24	0.319715	0.583	0.286	6.66703e-20		Eif1ax	4.36624e-14	0.473959	0.899	0.495	1.35585e-09		Vps28	3.49183e-121	0.471186	0.518	0.381	1.08432e-116		Arpc2	2.9735e-33	0.241114	0.974	0.917	9.23361e-29		Ilvbl	5.19002e-14	0.246102	0.266	0.102	1.61166e-09
Pum3	4.68822e-269	0.477177	0.511	0.163	1.45583e-264		Adss	2.21194e-24	0.343344	0.773	0.433	6.86874e-20		Slc7a5	4.4414e-14	0.325757	0.382	0.116	1.37919e-09		Selenoh	1.58936e-119	0.440175	0.313	0.136	4.93544e-115		Idh2	3.06661e-33	0.200729	0.217	0.076	9.52273e-29		Fbxo27	5.1941e-14	0.212811	0.156	0.045	1.61292e-09
Serpinb6b	9.32701e-269	0.908212	0.623	0.302	2.89632e-264		Ifi47	3.683e-24	0.645088	0.783	0.546	1.14368e-19		Cct8	5.15617e-14	0.475327	0.989	0.673	1.60115e-09		Jakmip1	1.68458e-119	0.411373	0.24	0.076	5.23112e-115		Rplp2	3.5718e-33	0.155299	1	0.999	1.10915e-28		Rnf43	5.28437e-14	0.115487	0.078	0.014	1.64096e-09
Fubp1	1.00747e-268	0.478826	0.921	0.629	3.1285e-264		Map3k8	3.83681e-24	0.353193	0.498	0.228	1.19144e-19		Etf1	5.20576e-14	0.481512	0.843	0.45	1.61655e-09		Cdc42se2	2.69718e-118	0.489171	0.403	0.243	8.37557e-114		Atp5c1	3.82931e-33	0.291001	0.82	0.612	1.18912e-28		Atp2b4	5.97141e-14	0.270269	0.197	0.067	1.8543e-09
Rsl24d1	4.72372e-267	0.496843	0.645	0.259	1.46686e-262		Tsr1	4.15669e-24	0.275678	0.485	0.213	1.29078e-19		Rbpj	5.84651e-14	0.624471	0.719	0.392	1.81552e-09		Lpxn	1.10285e-117	0.446941	0.273	0.106	3.42467e-113		Sh3bp5	5.17935e-33	0.204604	0.22	0.078	1.60834e-28		Tirap	6.10998e-14	0.167124	0.115	0.027	1.89733e-09
Eef1g	2.75222e-266	0.38219	0.986	0.902	8.54647e-262		Zfp593	4.49716e-24	0.316827	0.6	0.29	1.3965e-19		Chchd4	6.19729e-14	0.383458	0.719	0.304	1.92445e-09		Gtpbp2	1.88634e-117	0.450372	0.279	0.112	5.85766e-113		March2	5.98622e-33	0.235012	0.398	0.181	1.8589e-28		Pecam1	6.40464e-14	0.215928	0.206	0.07	1.98883e-09
Kif15	5.66268e-265	0.406407	0.22	0.015	1.75843e-260		Nol8	4.49959e-24	0.256537	0.566	0.256	1.39726e-19		Erh	6.51196e-14	0.47038	0.775	0.386	2.02216e-09		Tap2	2.06281e-117	0.455327	0.517	0.373	6.40565e-113		Tecpr1	6.87935e-33	0.236615	0.573	0.296	2.13625e-28		Cmc2	6.60258e-14	0.328751	0.372	0.172	2.0503e-09
Tlcd1	8.04328e-263	0.353889	0.248	0.026	2.49768e-258		Rps3a1	5.30136e-24	0.1474	1	1	1.64623e-19		Zmynd19	6.53475e-14	0.366692	0.472	0.164	2.02924e-09		Fis1	2.10244e-117	0.448491	0.532	0.408	6.5287e-113		Ncf4	7.61537e-33	0.252418	0.395	0.183	2.3648e-28		Tmem59	7.26332e-14	0.360473	0.702	0.467	2.25548e-09
Polr1b	5.246e-261	0.364743	0.298	0.047	1.62904e-256		Psma5	5.5001e-24	0.333276	0.844	0.545	1.70795e-19		Gfod1	6.57078e-14	0.424051	0.461	0.162	2.04043e-09		Snrk	8.46575e-117	0.440636	0.252	0.089	2.62887e-112		Scp2	7.91248e-33	0.255578	0.776	0.477	2.45706e-28		Arl4c	8.09239e-14	0.349952	0.601	0.341	2.51293e-09
Knop1	1.34067e-260	0.461203	0.568	0.201	4.16318e-256		Rack1	5.53673e-24	0.183088	1	0.998	1.71932e-19		Slc16a1	6.83265e-14	0.300446	0.539	0.189	2.12174e-09		Arl6ip5	9.08521e-117	0.438194	0.47	0.304	2.82123e-112		Tmem126a	8.64661e-33	0.214487	0.363	0.16	2.68503e-28		Scand1	8.11512e-14	0.34927	0.752	0.536	2.51999e-09
Heatr1	4.29283e-259	0.419097	0.388	0.093	1.33305e-254		Zbtb16	7.36029e-24	0.340524	0.671	0.348	2.28559e-19		Bysl	6.85449e-14	0.410401	0.517	0.192	2.12852e-09		Fam173a	3.66282e-116	0.470852	0.404	0.241	1.13741e-111		Tbc1d10c	1.01335e-32	0.207635	0.575	0.288	3.14677e-28		Pla2g16	8.22163e-14	0.321976	0.771	0.521	2.55306e-09
Ddx18	1.03051e-258	0.486663	0.655	0.276	3.20004e-254		Larp4	7.68509e-24	0.336372	0.671	0.357	2.38645e-19		Eif4e	7.10796e-14	0.513635	0.809	0.425	2.20724e-09		Neurl3	4.11626e-116	0.369693	0.166	0.029	1.27822e-111		Smdt1	1.29595e-32	0.293263	0.736	0.496	4.0243e-28		Diaph1	8.40109e-14	0.347866	0.674	0.418	2.60879e-09
Ssb	2.30058e-258	0.452214	0.935	0.657	7.14398e-254		Rpl10a	7.83414e-24	0.198396	1	0.996	2.43273e-19		Nip7	8.32458e-14	0.420924	0.843	0.412	2.58503e-09		Sash3	1.28427e-115	0.446869	0.273	0.109	3.98803e-111		Gclm	2.467e-32	0.184232	0.175	0.056	7.66076e-28		Crlf3	8.84489e-14	0.336699	0.606	0.363	2.7466e-09
Dnttip2	5.90224e-257	0.492757	0.722	0.337	1.83282e-252		Kpna3	8.49063e-24	0.254272	0.424	0.174	2.6366e-19		Cct3	8.71937e-14	0.467147	0.955	0.608	2.70763e-09		Rbm5	1.58371e-115	0.479088	0.481	0.335	4.91789e-111		Ephx1	2.99985e-32	0.116553	0.121	0.03	9.31544e-28		Abhd8	1.02909e-13	0.288631	0.528	0.271	3.19563e-09
Vsir	6.38139e-257	0.539658	0.703	0.333	1.98161e-252		Atad3a	8.9379e-24	0.290125	0.468	0.204	2.77548e-19		Imp4	9.04338e-14	0.457623	0.753	0.375	2.80824e-09		Efhd2	4.53377e-115	0.509285	0.452	0.317	1.40787e-110		Rnf167	3.17711e-32	0.253965	0.478	0.24	9.86589e-28		Ethe1	1.04258e-13	0.149661	0.161	0.047	3.23753e-09
Klf9	2.11121e-256	0.39619	0.311	0.055	6.55594e-252		Ppif	9.15221e-24	0.346052	0.471	0.206	2.84203e-19		Rpl15	9.40051e-14	0.252453	1	0.999	2.91914e-09		Tnfaip8l2	1.01887e-114	0.42577	0.263	0.098	3.16389e-110		Gna15	4.0896e-32	0.177129	0.221	0.079	1.26994e-27		Dock2	1.04597e-13	0.314732	0.78	0.561	3.24804e-09
Ube2q2	1.84357e-255	0.48664	0.482	0.153	5.72483e-251		Llph	1.37564e-23	0.345855	0.868	0.598	4.27178e-19		Nsun2	9.45351e-14	0.43987	0.787	0.387	2.9356e-09		Rpl9	2.40203e-114	0.131339	0.999	1	7.45902e-110		Hscb	1.38322e-31	0.186345	0.24	0.09	4.29532e-27		Gnai2	1.46549e-13	0.302692	0.858	0.584	4.55078e-09
Ung	8.14371e-255	0.374307	0.343	0.069	2.52887e-250		Nus1	1.53591e-23	0.293208	0.566	0.271	4.76945e-19		Stip1	9.45729e-14	0.393579	0.787	0.357	2.93677e-09		Pstpip1	3.74994e-114	0.447174	0.286	0.121	1.16447e-109		Ptprcap	1.49254e-31	0.262283	0.968	0.838	4.63479e-27		Cd37	1.57125e-13	0.295799	0.794	0.549	4.87921e-09
Trmt61a	8.70418e-255	0.374127	0.322	0.061	2.70291e-250		Arl5b	1.91334e-23	0.278585	0.319	0.119	5.9415e-19		Smarcc1	1.09478e-13	0.362176	0.685	0.291	3.39963e-09		Cited2	4.98182e-113	0.499913	0.408	0.244	1.547e-108		Ostf1	2.28103e-31	0.277497	0.647	0.381	7.08327e-27		Sema4f	1.59226e-13	0.0789961	0.05	0.007	4.94445e-09
Psme3	3.60022e-254	0.420506	0.477	0.146	1.11798e-249		Rps17	2.92049e-23	0.266037	0.997	0.934	9.069e-19		Tomm20	1.1634e-13	0.436841	1	0.848	3.61272e-09		Prf1	1.31635e-112	0.402253	0.181	0.041	4.08768e-108		Msn	2.39994e-31	0.291162	0.8	0.562	7.45253e-27		Churc1	1.66241e-13	0.325159	0.573	0.336	5.16229e-09
Zmynd19	6.40094e-254	0.369222	0.346	0.072	1.98768e-249		Nap1l1	2.95882e-23	0.394848	0.824	0.528	9.18801e-19		Mtap	1.27758e-13	0.402139	0.697	0.301	3.96726e-09		Abi3	1.6596e-112	0.365951	0.18	0.04	5.15355e-108		Ppib	2.45438e-31	0.256651	0.916	0.789	7.62159e-27		Selenot	1.69866e-13	0.352976	0.514	0.304	5.27485e-09
Atp1a1	6.42231e-254	0.479329	0.634	0.261	1.99432e-249		Canx	3.30157e-23	0.344548	0.824	0.512	1.02524e-18		Srgap3	1.35138e-13	0.184577	0.124	0.017	4.19646e-09		Ccdc88c	2.34178e-112	0.479445	0.37	0.208	7.27194e-108		Psmb8	2.50321e-31	0.235796	0.98	0.829	7.77322e-27		Cdk2ap2	1.79263e-13	0.315461	0.752	0.507	5.56666e-09
Amd1	1.26933e-253	0.400262	0.387	0.094	3.94165e-249		Txn2	3.38942e-23	0.328109	0.776	0.469	1.05252e-18		Cycs	1.45989e-13	0.444328	0.955	0.585	4.53341e-09		Ifi208	6.06023e-112	0.42936	0.226	0.072	1.88188e-107		Ppp1r18	2.7494e-31	0.21777	0.607	0.323	8.53771e-27		Fbxl2	1.94086e-13	0.0306834	0.014	0	6.02694e-09
Xbp1	1.34302e-253	0.472946	0.599	0.225	4.17049e-249		Hirip3	4.43515e-23	0.245717	0.369	0.146	1.37725e-18		Ivns1abp	1.47478e-13	0.451208	0.753	0.342	4.57963e-09		Supt4a	6.41983e-111	0.420823	0.592	0.5	1.99355e-106		Sept6	2.84548e-31	0.244435	0.67	0.4	8.83606e-27		Cyp2s1	1.94841e-13	0.028451	0.014	0	6.0504e-09
Tnfaip8	1.50158e-253	0.548987	0.81	0.446	4.66285e-249		Ruvbl1	4.6005e-23	0.30514	0.664	0.344	1.42859e-18		Ipo5	1.47832e-13	0.400815	0.663	0.27	4.59063e-09		Sp110	1.35485e-110	0.455608	0.353	0.188	4.20723e-106		Rpl22	3.57486e-31	0.16171	0.997	0.995	1.1101e-26		Stom	1.94841e-13	0.024845	0.014	0	6.0504e-09
Brix1	4.5573e-253	0.45486	0.6	0.23	1.41518e-248		Pus1	4.63472e-23	0.30843	0.485	0.223	1.43922e-18		Crem	1.4842e-13	0.450398	0.539	0.207	4.60888e-09		Samd3	3.91418e-110	0.401204	0.207	0.06	1.21547e-105		Ankrd44	3.92774e-31	0.246001	0.633	0.348	1.21968e-26		Rbm47	1.99435e-13	0.0145746	0.014	0	6.19307e-09
Taf1d	4.89677e-253	0.517817	0.648	0.275	1.52059e-248		Tnfaip3	4.74595e-23	0.364327	0.6	0.3	1.47376e-18		Pnldc1	1.62827e-13	0.0174596	0.011	0	5.05628e-09		Rps4x	9.39243e-110	0.135849	0.999	1	2.91663e-105		Emc9	3.94745e-31	0.118235	0.114	0.028	1.2258e-26		Pold4	2.14438e-13	0.242819	0.39	0.176	6.65894e-09
Socs3	9.04872e-253	0.540658	0.306	0.054	2.8099e-248		Luc7l	5.97877e-23	0.29186	0.603	0.293	1.85659e-18		Sfrp5	1.62827e-13	0.0134793	0.011	0	5.05628e-09		Git2	1.75668e-109	0.479566	0.422	0.267	5.45503e-105		Sc5d	5.16348e-31	0.197303	0.286	0.116	1.60341e-26		9930111J21Rik2	2.2417e-13	0.259057	0.509	0.255	6.96116e-09
Eif3j1	1.71834e-252	0.446771	0.531	0.181	5.33596e-248		Anp32e	6.00298e-23	0.365681	0.756	0.446	1.8641e-18		Parm1	1.64683e-13	0.0145083	0.011	0	5.1139e-09		Rpl10	4.82283e-109	0.177127	0.996	0.998	1.49763e-104		Selenoh	5.36925e-31	0.23607	0.444	0.214	1.66731e-26		Ndufv3	2.28541e-13	0.339139	0.564	0.33	7.0969e-09
Slc7a5	2.29374e-250	0.355323	0.269	0.038	7.12275e-246		Nob1	6.28222e-23	0.251287	0.451	0.195	1.95082e-18		Gm11614	1.64683e-13	0.0142379	0.011	0	5.1139e-09		Pdcd4	7.89413e-109	0.339036	0.619	0.438	2.45136e-104		Nudt14	7.83424e-31	0.130077	0.132	0.036	2.43277e-26		Axin2	2.94606e-13	0.214792	0.193	0.066	9.1484e-09
Psma5	1.211e-249	0.474589	0.793	0.426	3.76053e-245		Rpl8	6.4737e-23	0.151036	1	1	2.01028e-18		Ehd2	1.64683e-13	0.0142019	0.011	0	5.1139e-09		Klf13	3.23616e-108	0.460219	0.413	0.254	1.00493e-103		Fermt3	8.72464e-31	0.240764	0.567	0.305	2.70926e-26		mt-Nd1	3.00836e-13	0.176342	1	0.996	9.34185e-09
Pdcd1	1.79923e-249	0.39689	0.31	0.057	5.58715e-245		Btf3	6.84434e-23	0.243831	0.99	0.966	2.12537e-18		Arg2	1.64683e-13	0.0132479	0.011	0	5.1139e-09		Zcchc11	1.36237e-107	0.48297	0.416	0.262	4.23056e-103		Grk6	1.15681e-30	0.226638	0.366	0.168	3.59223e-26		Pabpc1l	3.15001e-13	0.0522491	0.028	0.002	9.78172e-09
Imp4	4.39586e-249	0.452034	0.625	0.246	1.36504e-244		Hnrnpf	7.3633e-23	0.266246	0.983	0.93	2.28652e-18		Gm15908	1.64683e-13	0.0121962	0.011	0	5.1139e-09		Fam53b	5.9067e-107	0.455891	0.306	0.146	1.83421e-102		Acaa2	1.3421e-30	0.198473	0.349	0.153	4.16761e-26		Oaz1	3.2173e-13	0.214035	0.986	0.981	9.99068e-09
Tars	4.43556e-247	0.444685	0.495	0.16	1.37738e-242		Chchd2	7.94886e-23	0.285256	0.993	0.95	2.46836e-18		Gm35248	1.64683e-13	0.0117413	0.011	0	5.1139e-09		Bin2	2.03604e-106	0.413993	0.284	0.122	6.32251e-102		Lck	1.68045e-30	0.244507	0.925	0.695	5.21832e-26		Mif4gd	3.21966e-13	0.28173	0.367	0.169	9.99802e-09
Hnrnpa1	5.28676e-247	0.462784	0.896	0.601	1.6417e-242		Snrpd3	9.09187e-23	0.340412	0.837	0.524	2.8233e-18		C5ar2	1.64683e-13	0.00948609	0.011	0	5.1139e-09		Ndufa6	8.42312e-106	0.421283	0.568	0.483	2.61563e-101		Cpq	1.92923e-30	0.121132	0.106	0.025	5.99083e-26		Ddr1	3.30539e-13	0.181285	0.138	0.039	1.02642e-08
Maff	1.00292e-245	0.340765	0.227	0.021	3.11436e-241		Mybbp1a	9.44549e-23	0.322724	0.634	0.326	2.93311e-18		Rps20	1.67995e-13	0.258297	1	0.999	5.21676e-09		Commd3	1.97432e-105	0.403277	0.288	0.127	6.13084e-101		Arpc5	1.93012e-30	0.301053	0.837	0.651	5.99361e-26		Dexi	3.7667e-13	0.265881	0.28	0.113	1.16967e-08
Btf3	1.43686e-245	0.30908	0.989	0.954	4.46189e-241		Larp7	1.08582e-22	0.240065	0.447	0.189	3.3718e-18		Ung	1.89899e-13	0.388636	0.461	0.162	5.89693e-09		Hp1bp3	2.89726e-105	0.469363	0.377	0.22	8.99686e-101		Arl2bp	2.43524e-30	0.222455	0.425	0.207	7.56216e-26		Entpd7	4.31454e-13	0.151114	0.128	0.034	1.33979e-08
Dnajc21	4.07514e-244	0.450101	0.601	0.232	1.26545e-239		Tfdp1	1.20262e-22	0.242216	0.339	0.131	3.7345e-18		Mat2a	1.97328e-13	0.432507	0.966	0.592	6.12763e-09		Tecr	6.29236e-105	0.449735	0.477	0.347	1.95397e-100		Anapc16	3.74906e-30	0.266988	0.444	0.233	1.16419e-25		Cox7a2l	4.53406e-13	0.270192	0.908	0.723	1.40796e-08
Polr1d	4.52936e-244	0.428771	0.938	0.708	1.4065e-239		AC160336.1	1.24046e-22	0.437493	0.614	0.344	3.85199e-18		Eea1	2.04645e-13	0.51834	0.584	0.239	6.35485e-09		Pik3cd	6.60337e-105	0.425654	0.28	0.121	2.05055e-100		Eif4e3	4.00702e-30	0.131805	0.151	0.045	1.2443e-25		Gm26740	4.722e-13	0.275818	0.766	0.469	1.46632e-08
Egr1	4.92533e-241	0.828527	0.412	0.12	1.52946e-236		Dnaja1	1.32035e-22	0.359724	0.966	0.885	4.10008e-18		Rangap1	2.19367e-13	0.359199	0.697	0.294	6.81202e-09		Cir1	6.96668e-105	0.428175	0.232	0.083	2.16336e-100		Actr3	4.2346e-30	0.252917	0.957	0.82	1.31497e-25		Gpr34	5.07332e-13	0.220312	0.193	0.065	1.57542e-08
Tuba4a	2.28961e-240	0.480747	0.699	0.325	7.10991e-236		Eif2b3	1.33615e-22	0.224106	0.386	0.156	4.14916e-18		Slc25a3	2.23142e-13	0.403092	1	0.841	6.92924e-09		Ddx58	7.32354e-105	0.406184	0.238	0.085	2.27418e-100		Elf4	6.32805e-30	0.183734	0.295	0.124	1.96505e-25		Cast	5.09562e-13	0.301007	0.495	0.264	1.58234e-08
Hsp90b1	3.06793e-240	0.447806	0.944	0.694	9.52684e-236		Ak2	1.75307e-22	0.337972	0.831	0.498	5.44382e-18		Prpf4	2.28772e-13	0.273813	0.494	0.167	7.10405e-09		Gpc1	4.47056e-104	0.312894	0.12	0.011	1.38824e-99		Cdk2ap2	9.07233e-30	0.295669	0.747	0.496	2.81723e-25		Nlrc3	5.66158e-13	0.264196	0.271	0.11	1.75809e-08
Dnaja2	2.0732e-239	0.455759	0.882	0.555	6.4379e-235		Slc7a5	1.94456e-22	0.223319	0.308	0.113	6.03845e-18		Mrpl12	2.45655e-13	0.478025	0.843	0.466	7.62833e-09		Btg2	5.01438e-104	0.334266	0.726	0.624	1.55712e-99		Fgf13	1.11035e-29	0.14283	0.114	0.029	3.44798e-25		Laptm4b	6.01142e-13	0.0814076	0.041	0.005	1.86673e-08
Psme2	1.41019e-238	0.441363	0.953	0.726	4.37906e-234		Mrpl15	2.015e-22	0.331144	0.736	0.42	6.25719e-18		Stat5a	2.75609e-13	0.546414	0.483	0.184	8.5585e-09		Csnk1g2	6.49719e-104	0.468812	0.385	0.238	2.01757e-99		Hp1bp3	1.1215e-29	0.247337	0.528	0.286	3.48261e-25		Atg9a	7.14921e-13	0.130312	0.106	0.025	2.22004e-08
Tsr1	2.5468e-238	0.406594	0.415	0.117	7.90859e-234		Ivns1abp	2.12431e-22	0.356765	0.631	0.337	6.59663e-18		Agpat5	2.87224e-13	0.373916	0.64	0.263	8.91918e-09		Sys1	6.84414e-104	0.449839	0.448	0.315	2.12531e-99		Tspan13	1.16397e-29	0.256844	0.318	0.142	3.61447e-25		Actr3	7.85923e-13	0.276572	0.936	0.827	2.44053e-08
Bhlhe40	4.96206e-238	0.511941	0.527	0.187	1.54087e-233		Rcc2	2.17773e-22	0.298205	0.763	0.427	6.76251e-18		Rpl28	2.89568e-13	0.258194	1	0.993	8.99197e-09		Esyt2	9.88652e-104	0.436937	0.276	0.12	3.07006e-99		Anxa6	1.16597e-29	0.27276	0.591	0.339	3.62068e-25		Hsd11b1	8.2811e-13	0.281404	0.362	0.167	2.57153e-08
Ak6	1.26734e-237	0.400824	0.419	0.119	3.93546e-233		Nudc	2.22324e-22	0.365294	0.81	0.533	6.90383e-18		Lgmn	3.29775e-13	0.0723579	0.067	0.006	1.02405e-08		Ccr2	1.35877e-102	0.427531	0.518	0.358	4.21939e-98		Nipal1	1.26578e-29	0.116084	0.088	0.018	3.93062e-25		Ucp2	8.36139e-13	0.360098	0.771	0.597	2.59646e-08
St6galnac4	1.3809e-237	0.414495	0.459	0.141	4.28812e-233		Tnfrsf4	2.26453e-22	0.508568	0.203	0.062	7.03206e-18		Slc3a2	4.0437e-13	0.455079	0.91	0.547	1.25569e-08		Psmb1	2.06731e-102	0.304551	0.798	0.813	6.41963e-98		Rfc1	1.31166e-29	0.168768	0.25	0.098	4.07308e-25		Myh9	9.73984e-13	0.398941	0.61	0.405	3.02451e-08
Hnrnpc	2.5273e-237	0.45584	0.872	0.542	7.84803e-233		Mrpl32	2.37576e-22	0.300162	0.708	0.375	7.37745e-18		Rrs1	4.60305e-13	0.411205	0.787	0.368	1.42938e-08		Npc2	2.15564e-102	0.410133	0.514	0.385	6.69391e-98		Arpc3	1.44472e-29	0.268259	0.937	0.828	4.48629e-25		Il6ra	1.02692e-12	0.127246	0.11	0.027	3.18891e-08
Srsf10	4.77521e-236	0.461692	0.698	0.318	1.48284e-231		Nars	2.56141e-22	0.297704	0.61	0.304	7.95394e-18		Ahsa1	4.67271e-13	0.466649	0.876	0.485	1.45102e-08		Stk10	2.24763e-102	0.436154	0.312	0.152	6.97956e-98		Stk4	2.09644e-29	0.256455	0.608	0.347	6.51007e-25		Dapp1	1.03271e-12	0.235076	0.234	0.089	3.20687e-08
Fam60a	7.91414e-235	0.416692	0.443	0.135	2.45758e-230		Nomo1	3.37303e-22	0.204713	0.302	0.109	1.04743e-17		Grpel1	4.91045e-13	0.465344	0.854	0.485	1.52484e-08		Slc25a11	3.39378e-102	0.438481	0.327	0.172	1.05387e-97		Krcc1	2.24878e-29	0.217303	0.515	0.269	6.98313e-25		Dhrs3	1.05197e-12	0.151302	0.064	0.011	3.2667e-08
Aimp2	1.08097e-234	0.374724	0.375	0.095	3.35674e-230		Rps19	3.76367e-22	0.172376	1	0.999	1.16873e-17		Znhit6	5.10775e-13	0.433099	0.584	0.24	1.58611e-08		Tram1	1.38749e-101	0.447631	0.499	0.383	4.30856e-97		Plin3	2.28281e-29	0.138828	0.132	0.037	7.08882e-25		Sytl1	1.11969e-12	0.162483	0.142	0.041	3.47697e-08
Polr3d	1.90358e-234	0.379677	0.37	0.091	5.91119e-230		Metap2	4.02225e-22	0.316917	0.749	0.431	1.24903e-17		Mpp6	5.28356e-13	0.453598	0.73	0.344	1.64071e-08		Krcc1	2.39254e-101	0.461291	0.358	0.203	7.42954e-97		Atp5g2	2.30166e-29	0.25082	0.916	0.764	7.14734e-25		Tnrc6b	1.15899e-12	0.276764	0.587	0.313	3.599e-08
Bysl	4.85829e-234	0.380583	0.379	0.097	1.50864e-229		Iars	4.37418e-22	0.271427	0.41	0.175	1.35831e-17		5830411N06Rik	6.38094e-13	0.2354	0.09	0.01	1.98147e-08		Spata13	2.92083e-101	0.409448	0.234	0.086	9.07006e-97		Myh9	2.4845e-29	0.250157	0.654	0.392	7.71511e-25		Il18rap	1.21751e-12	0.292566	0.422	0.215	3.78074e-08
Hilpda	4.34544e-232	0.472214	0.377	0.099	1.34939e-227		Eif3b	5.20882e-22	0.330395	0.736	0.403	1.6175e-17		Nomo1	6.72306e-13	0.268645	0.371	0.113	2.08771e-08		Rsbn1l	1.87885e-100	0.445606	0.471	0.353	5.8344e-96		Iqgap1	2.60279e-29	0.250325	0.593	0.34	8.08243e-25		Abhd17a	1.30135e-12	0.306252	0.532	0.305	4.04107e-08
Gfod1	9.27876e-232	0.403123	0.334	0.074	2.88133e-227		Stat5a	6.23695e-22	0.27038	0.417	0.18	1.93676e-17		Tsr1	6.88274e-13	0.346924	0.562	0.218	2.1373e-08		Il27ra	2.75289e-100	0.464248	0.383	0.235	8.54855e-96		Chmp5	2.6246e-29	0.202128	0.438	0.217	8.15016e-25		2810001G20Rik	1.51452e-12	0.250563	0.312	0.136	4.70304e-08
Fes	1.55964e-231	0.313345	0.193	0.013	4.84314e-227		Eif3c	7.74951e-22	0.329313	0.915	0.643	2.40646e-17		Chchd2	6.90534e-13	0.314481	1	0.951	2.14431e-08		Rchy1	6.87405e-100	0.44774	0.356	0.207	2.1346e-95		Prdx2	3.10963e-29	0.265681	0.702	0.459	9.65634e-25		Tgfbr3	1.57369e-12	0.0661197	0.046	0.006	4.88678e-08
Rangap1	2.12594e-231	0.425268	0.515	0.181	6.60168e-227		Knop1	7.78595e-22	0.287316	0.627	0.32	2.41777e-17		Dkc1	7.07273e-13	0.45949	0.854	0.463	2.19629e-08		Cbx4	7.02666e-100	0.41037	0.263	0.112	2.18199e-95		Nqo2	3.38865e-29	0.0884589	0.071	0.013	1.05228e-24		Prkx	1.62853e-12	0.250307	0.271	0.113	5.05707e-08
Manf	3.98305e-231	0.527973	0.818	0.492	1.23686e-226		Psmd11	8.23827e-22	0.345759	0.78	0.464	2.55823e-17		2410002F23Rik	7.24516e-13	0.305698	0.528	0.192	2.24984e-08		Ech1	1.95401e-99	0.399695	0.28	0.124	6.0678e-95		2810474O19Rik	3.56659e-29	0.307011	0.631	0.381	1.10753e-24		Arhgap30	1.65728e-12	0.304986	0.67	0.42	5.14636e-08
Ppif	2.09694e-230	0.422423	0.403	0.113	6.51163e-226		Ubash3b	8.79132e-22	0.349632	0.383	0.165	2.72997e-17		Psma5	8.2842e-13	0.438181	0.91	0.551	2.57249e-08		Lbh	2.16974e-99	0.432881	0.403	0.251	6.73769e-95		Tstd3	3.7808e-29	0.120493	0.141	0.041	1.17405e-24		Kat2b	1.77673e-12	0.140648	0.138	0.039	5.51729e-08
Mir17hg	6.12137e-230	0.337121	0.241	0.031	1.90087e-225		Atp5g1	9.22056e-22	0.363434	0.888	0.686	2.86326e-17		Ddx39	8.84253e-13	0.411844	0.82	0.427	2.74587e-08		Cox4i1	2.24993e-99	0.238215	0.935	0.955	6.98671e-95		Mgst2	3.9323e-29	0.190832	0.303	0.129	1.2211e-24		Lipa	2.08241e-12	0.166542	0.193	0.066	6.4665e-08
Pkm	7.1528e-230	0.491998	0.892	0.637	2.22116e-225		Ltv1	9.38908e-22	0.288925	0.481	0.226	2.91559e-17		Avpi1	9.19711e-13	0.181046	0.135	0.021	2.85598e-08		Cul3	2.35475e-99	0.44685	0.506	0.411	7.3122e-95		Cd47	4.08644e-29	0.256636	0.905	0.689	1.26896e-24		Saraf	2.08776e-12	0.321661	0.624	0.388	6.48312e-08
Rpl7l1	2.60734e-229	0.446845	0.688	0.313	8.09659e-225		Nol11	9.65911e-22	0.295863	0.603	0.307	2.99944e-17		Tap1	9.43078e-13	0.448501	0.787	0.406	2.92854e-08		Sec11c	4.45062e-99	0.264229	0.77	0.66	1.38205e-94		Oas3	4.61041e-29	0.112219	0.126	0.035	1.43167e-24		Icos	2.16119e-12	0.259198	0.771	0.535	6.71115e-08
Ruvbl2	9.42085e-228	0.369058	0.392	0.106	2.92546e-223		Zfp330	1.04171e-21	0.245902	0.529	0.243	3.23482e-17		Ndfip1	1.11589e-12	0.431526	0.921	0.544	3.46516e-08		Cbx3	6.35861e-99	0.444135	0.487	0.368	1.97454e-94		B3gnt5	6.03422e-29	0.0706531	0.04	0.004	1.87381e-24		Rora	2.22587e-12	0.326751	0.615	0.392	6.91198e-08
Txn2	3.38445e-227	0.451818	0.721	0.348	1.05097e-222		Brix1	1.07791e-21	0.319699	0.658	0.35	3.34724e-17		Spata5	1.12519e-12	0.311989	0.472	0.167	3.49407e-08		Rps29	1.95333e-98	0.160224	0.997	0.999	6.06568e-94		Zmat5	6.058e-29	0.184874	0.361	0.166	1.88119e-24		Sdccag8	2.254e-12	0.155313	0.128	0.036	6.99936e-08
Wdr3	7.32498e-227	0.383128	0.412	0.118	2.27463e-222		Noa1	1.08998e-21	0.212262	0.4	0.164	3.38471e-17		Unc13b	1.17998e-12	0.0362911	0.034	0.002	3.66418e-08		Frmd8	2.00597e-98	0.366305	0.202	0.064	6.22912e-94		Rgs19	6.72405e-29	0.188012	0.35	0.16	2.08802e-24		Echs1	2.27384e-12	0.266463	0.321	0.146	7.06095e-08
Nfkbiz	5.47549e-224	0.503172	0.443	0.143	1.7003e-219		Ssb	1.22242e-21	0.326058	0.942	0.748	3.79598e-17		Ntmt1	1.23134e-12	0.314324	0.449	0.156	3.82367e-08		Jun	2.382e-98	0.561173	0.429	0.274	7.39682e-94		Kif21b	7.63969e-29	0.16974	0.324	0.141	2.37235e-24		H2afz	2.54876e-12	0.259006	0.858	0.693	7.91466e-08
Mrpl20	1.54932e-223	0.442579	0.774	0.41	4.81111e-219		Gtf2f2	1.38092e-21	0.213483	0.458	0.198	4.28818e-17		Zc3h15	1.31065e-12	0.481167	0.876	0.508	4.06997e-08		Cln3	3.31003e-98	0.354291	0.175	0.046	1.02786e-93		Tob1	8.28154e-29	0.224659	0.221	0.087	2.57167e-24		Brd9	2.7322e-12	0.231556	0.275	0.115	8.48431e-08
Hsd17b12	4.19376e-223	0.387295	0.461	0.151	1.30229e-218		Ppat	1.44213e-21	0.25107	0.532	0.251	4.47824e-17		Slamf1	1.33049e-12	0.383598	0.64	0.276	4.13157e-08		Ptpre	4.59396e-98	0.417452	0.239	0.093	1.42656e-93		A430106G13Rik	1.00971e-28	0.0655299	0.057	0.008	3.13546e-24		Mrpl33	2.90831e-12	0.316385	0.656	0.433	9.03117e-08
Ltv1	4.81844e-223	0.38021	0.428	0.13	1.49627e-218		Slc25a33	1.5699e-21	0.230737	0.363	0.147	4.87501e-17		Larp4	1.40549e-12	0.408092	0.775	0.363	4.36446e-08		Taldo1	4.69915e-98	0.392786	0.563	0.473	1.45923e-93		Gemin2	1.48941e-28	0.123366	0.158	0.05	4.62508e-24		Filip1l	2.99785e-12	0.255229	0.229	0.089	9.30922e-08
Psma7	7.6647e-223	0.418123	0.931	0.681	2.38012e-218		Phb	1.58429e-21	0.265552	0.512	0.238	4.91968e-17		Rrp12	1.44602e-12	0.238855	0.281	0.075	4.49032e-08		Cd48	6.41468e-98	0.326644	0.643	0.532	1.99195e-93		Thra	1.58536e-28	0.149197	0.137	0.04	4.92302e-24		Klf4	3.01275e-12	0.165234	0.092	0.021	9.35549e-08
Abce1	1.81549e-222	0.408448	0.54	0.202	5.63764e-218		Cct7	1.61249e-21	0.325779	0.885	0.645	5.00727e-17		Jagn1	1.55236e-12	0.376343	0.607	0.255	4.82053e-08		Rpl23	1.56323e-97	0.117184	1	1	4.85429e-93		A430078G23Rik	1.63517e-28	0.184913	0.2	0.072	5.07771e-24		Gm19705	3.01379e-12	0.103717	0.078	0.016	9.35872e-08
Plcxd2	2.43449e-221	0.434582	0.4	0.116	7.55982e-217		Gm26735	1.74157e-21	0.0328709	0.031	0.002	5.40808e-17		Wdr77	1.64583e-12	0.314588	0.506	0.186	5.1108e-08		Prrt1	2.5013e-97	0.330664	0.162	0.038	7.76729e-93		Capn1	1.80433e-28	0.168468	0.253	0.102	5.60299e-24		Def6	3.21121e-12	0.266735	0.417	0.205	9.97178e-08
Jak2	1.64224e-220	0.631679	0.672	0.352	5.09966e-216		Tgtp1	1.76246e-21	0.123003	0.105	0.02	5.47296e-17		Lmna	1.65845e-12	0.128364	0.079	0.008	5.14998e-08		Gsk3b	3.89866e-97	0.451559	0.317	0.166	1.21065e-92		Plec	1.95863e-28	0.138096	0.163	0.053	6.08213e-24		Agtrap	3.61621e-12	0.174113	0.151	0.047	1.12294e-07
Papd7	2.36299e-218	0.354817	0.307	0.065	7.33778e-214		Pmepa1	1.76888e-21	0.227735	0.193	0.057	5.49291e-17		Psmd7	1.72875e-12	0.423283	0.865	0.484	5.36829e-08		Gm20069	2.62771e-96	0.363187	0.182	0.052	8.15984e-92		Coro1b	2.20907e-28	0.16797	0.278	0.115	6.85981e-24		Cep170	3.72135e-12	0.169721	0.124	0.035	1.15559e-07
Gtf2f2	5.63443e-218	0.35826	0.387	0.108	1.74966e-213		Sap30	1.76924e-21	0.18966	0.244	0.08	5.49401e-17		Lonrf3	1.78872e-12	0.0889406	0.079	0.008	5.55452e-08		Tapbp	3.22415e-96	0.413557	0.525	0.414	1.0012e-91		Pkn1	2.37018e-28	0.213857	0.499	0.257	7.36011e-24		Cib1	3.98317e-12	0.265422	0.404	0.205	1.23689e-07
Fasn	6.69596e-218	0.374042	0.397	0.114	2.0793e-213		Atp2a2	2.05641e-21	0.273039	0.647	0.328	6.38578e-17		Ubiad1	1.96785e-12	0.168752	0.191	0.04	6.11077e-08		Smdt1	3.5144e-96	0.40022	0.559	0.46	1.09133e-91		Tesc	2.5552e-28	0.35035	0.591	0.374	7.93466e-24		Tmem229b	4.27158e-12	0.177572	0.239	0.091	1.32645e-07
Ipo7	1.88803e-217	0.393089	0.429	0.134	5.8629e-213		Rpl41	2.63001e-21	0.211781	0.997	0.985	8.16697e-17		Usp6nl	1.98518e-12	0.0860772	0.079	0.008	6.16459e-08		Rassf2	4.26023e-96	0.365658	0.194	0.06	1.32293e-91		Ctnnbl1	2.69276e-28	0.187679	0.272	0.115	8.36184e-24		AC163354.1	4.43355e-12	0.425393	0.326	0.154	1.37675e-07
Fam162a	2.88743e-217	0.453858	0.593	0.25	8.96634e-213		Nfkbiz	2.69834e-21	0.35135	0.502	0.24	8.37917e-17		Naf1	1.98685e-12	0.356556	0.472	0.175	6.16975e-08		Chd3	1.12069e-95	0.45153	0.518	0.419	3.48007e-91		Pqlc3	3.2048e-28	0.083234	0.083	0.017	9.95187e-24		Fam69a	4.44557e-12	0.190636	0.174	0.059	1.38048e-07
Gm45716	6.25867e-216	0.437242	0.36	0.097	1.9435e-211		Rcc1	2.90279e-21	0.217101	0.285	0.104	9.01404e-17		Mrpl17	2.07675e-12	0.317012	0.64	0.254	6.44895e-08		Il10rb	2.96909e-95	0.40202	0.227	0.087	9.21993e-91		Lims1	3.23187e-28	0.189707	0.419	0.204	1.00359e-23		Cerk	4.46454e-12	0.176154	0.193	0.067	1.38637e-07
Nop14	1.4514e-215	0.400586	0.515	0.186	4.50703e-211		Impdh2	2.95108e-21	0.288276	0.651	0.342	9.164e-17		Srsf10	2.1155e-12	0.4143	0.831	0.447	6.56928e-08		Itpr2	5.42036e-95	0.453245	0.37	0.222	1.68319e-90		Txndc15	4.60707e-28	0.187747	0.289	0.124	1.43063e-23		Casp9	4.92642e-12	0.0773219	0.064	0.011	1.5298e-07
Magohb	1.74298e-215	0.340072	0.38	0.104	5.41248e-211		Ipo4	3.01499e-21	0.179473	0.264	0.091	9.36244e-17		Ahr	2.64638e-12	0.401118	0.326	0.097	8.21779e-08		Os9	6.61901e-95	0.451403	0.362	0.218	2.0554e-90		Mettl9	4.91369e-28	0.200895	0.3	0.135	1.52585e-23		Tmem234	5.08812e-12	0.319109	0.661	0.442	1.58001e-07
Smyd5	4.73744e-215	0.331355	0.292	0.06	1.47112e-210		Naa20	3.05153e-21	0.33266	0.631	0.342	9.47593e-17		Pus1	2.70012e-12	0.340392	0.573	0.227	8.3847e-08		Grap2	7.20529e-95	0.373395	0.224	0.082	2.23746e-90		Stk10	4.92508e-28	0.2084	0.445	0.222	1.52938e-23		Rpl39	5.32747e-12	0.18753	1	0.995	1.65434e-07
Snrpa	4.89439e-215	0.380024	0.46	0.152	1.51986e-210		Hivep1	3.19595e-21	0.193619	0.275	0.097	9.92437e-17		Rps27l	2.7809e-12	0.486341	0.933	0.589	8.63552e-08		Ndufv3	1.20811e-94	0.423667	0.404	0.259	3.75153e-90		Sgk3	5.00611e-28	0.137089	0.149	0.046	1.55455e-23		Tex264	5.59642e-12	0.224575	0.28	0.12	1.73786e-07
Xpot	9.03306e-215	0.357492	0.331	0.08	2.80504e-210		Cdc37	3.24758e-21	0.326578	0.878	0.579	1.00847e-16		Rnf149	3.01279e-12	0.346839	0.539	0.212	9.35563e-08		Mfsd10	1.49586e-94	0.431597	0.269	0.123	4.64509e-90		Sigirr	5.67773e-28	0.145131	0.198	0.071	1.76311e-23		Cmtm6	6.22852e-12	0.35672	0.454	0.255	1.93414e-07
Mettl1	7.79269e-214	0.377038	0.354	0.093	2.41986e-209		Eprs	3.40272e-21	0.360413	0.797	0.492	1.05665e-16		Orai1	3.28177e-12	0.456825	0.876	0.476	1.01909e-07		Fermt3	1.53854e-94	0.4323	0.393	0.244	4.77764e-90		Crlf3	6.01046e-28	0.287602	0.594	0.353	1.86643e-23		Arhgap25	7.33238e-12	0.198382	0.261	0.106	2.27693e-07
Tmem97	2.20274e-213	0.298886	0.232	0.032	6.84017e-209		Psmd7	3.53887e-21	0.347724	0.786	0.478	1.09892e-16		Hivep1	3.54523e-12	0.244042	0.337	0.1	1.1009e-07		Sit1	2.85107e-94	0.349515	0.176	0.048	8.85344e-90		D930028M14Rik	6.50034e-28	0.0443141	0.028	0.002	2.01855e-23		Runx2	7.71993e-12	0.149713	0.078	0.016	2.39727e-07
Epcam	3.37919e-213	0.33237	0.196	0.018	1.04934e-208		Pin1	3.66085e-21	0.329761	0.651	0.356	1.13681e-16		Txnl4a	3.65729e-12	0.421678	0.708	0.356	1.1357e-07		Rpl22	1.06487e-93	0.167428	0.994	0.997	3.30675e-89		Mcee	6.51192e-28	0.138367	0.157	0.05	2.02215e-23		Thy1	7.89427e-12	0.297264	0.867	0.696	2.45141e-07
Ndufab1	4.07348e-212	0.443207	0.784	0.44	1.26494e-207		Crem	3.6756e-21	0.28937	0.451	0.203	1.14139e-16		Slc19a1	3.91256e-12	0.301584	0.528	0.197	1.21497e-07		Ncor1	1.36298e-93	0.350552	0.691	0.661	4.23246e-89		Slco3a1	7.3238e-28	0.234834	0.335	0.158	2.27426e-23		Coa3	8.448e-12	0.310394	0.528	0.312	2.62336e-07
Rnf126	5.0279e-211	0.363305	0.41	0.125	1.56131e-206		Nufip1	4.07163e-21	0.244412	0.447	0.2	1.26436e-16		Mapk6	4.06066e-12	0.334517	0.562	0.215	1.26096e-07		Nod1	2.31486e-93	0.270375	0.107	0.009	7.18834e-89		Gm2a	7.52005e-28	0.186963	0.244	0.098	2.3352e-23		Actb	8.66962e-12	0.21008	1	0.999	2.69218e-07
Ube2a	7.79326e-211	0.446572	0.588	0.251	2.42004e-206		Dimt1	4.26168e-21	0.247337	0.451	0.203	1.32338e-16		Pitrm1	4.14758e-12	0.273992	0.303	0.086	1.28795e-07		Diaph1	2.59276e-93	0.449003	0.476	0.365	8.0513e-89		Zfp512b	8.65123e-28	0.112563	0.14	0.042	2.68647e-23		Nxnl2	8.81674e-12	0.0262312	0.014	0.001	2.73786e-07
Tomm70a	5.66919e-210	0.405125	0.541	0.21	1.76045e-205		Nfkbia	4.43788e-21	0.362325	0.932	0.71	1.3781e-16		Ssb	4.27977e-12	0.372906	0.978	0.752	1.329e-07		Pnrc2	2.93214e-93	0.409288	0.252	0.109	9.10518e-89		Rgs14	1.25841e-27	0.1444	0.21	0.078	3.90775e-23		Tmem51	8.84661e-12	0.0246984	0.014	0.001	2.74714e-07
Mrpl15	1.05589e-209	0.427058	0.659	0.306	3.27885e-205		Timm50	5.17533e-21	0.268465	0.481	0.225	1.6071e-16		Noc3l	4.36441e-12	0.35531	0.494	0.192	1.35528e-07		Atp5c1	5.12353e-93	0.352219	0.65	0.599	1.59101e-88		Rpl10	1.36768e-27	0.157526	1	0.997	4.24705e-23		Nsf	8.86063e-12	0.23584	0.294	0.13	2.75149e-07
Nfkb2	3.23693e-209	0.380965	0.452	0.149	1.00516e-204		Tgif1	5.72674e-21	0.28206	0.437	0.196	1.77832e-16		Nufip1	4.42371e-12	0.330785	0.528	0.204	1.37369e-07		Phip	6.78213e-93	0.463968	0.375	0.229	2.10606e-88		Celf2	1.70973e-27	0.226535	0.734	0.457	5.30921e-23		Cdc25b	9.20844e-12	0.124367	0.083	0.018	2.8595e-07
Cdk17	3.5541e-208	0.419696	0.531	0.204	1.10366e-203		Rps27a	6.62928e-21	0.134902	1	1	2.05859e-16		Hdgf	4.52759e-12	0.435012	0.876	0.499	1.40595e-07		Commd7	1.48964e-92	0.423061	0.366	0.229	4.62579e-88		Gltp	2.30422e-27	0.186866	0.392	0.189	7.15529e-23		Rnls	9.25643e-12	0.0503814	0.028	0.002	2.8744e-07
Smarcc1	1.10158e-207	0.400952	0.501	0.184	3.42074e-203		Nop2	6.83467e-21	0.220378	0.403	0.168	2.12237e-16		Skil	4.99105e-12	0.293541	0.438	0.153	1.54987e-07		Ctsb	2.36028e-92	0.452364	0.433	0.309	7.32939e-88		Flot1	2.55363e-27	0.149469	0.187	0.066	7.9298e-23		Cnp	9.57686e-12	0.260449	0.454	0.238	2.9739e-07
Polr2f	3.73037e-207	0.435589	0.699	0.342	1.15839e-202		Lad1	7.0622e-21	0.102483	0.058	0.007	2.19302e-16		Morf4l2	5.01535e-12	0.380191	0.742	0.332	1.55742e-07		Xpa	1.63745e-91	0.37085	0.201	0.069	5.08478e-87		Jakmip1	2.79583e-27	0.173637	0.336	0.15	8.68188e-23		Nme4	9.70009e-12	0.0632278	0.041	0.005	3.01217e-07
Fasl	5.41874e-206	0.461194	0.637	0.286	1.68268e-201		Gspt1	7.07141e-21	0.340708	0.783	0.495	2.19589e-16		Mpzl3	5.25979e-12	0.344089	0.348	0.11	1.63332e-07		Phf21a	7.8691e-91	0.37234	0.209	0.073	2.44359e-86		Pdlim2	3.11583e-27	0.161111	0.341	0.152	9.6756e-23		Msn	9.75166e-12	0.30135	0.771	0.573	3.02818e-07
Spag9	1.55484e-205	0.436693	0.49	0.181	4.82823e-201		Eea1	7.13369e-21	0.377174	0.481	0.235	2.21522e-16		Prmt6	5.31158e-12	0.241703	0.337	0.102	1.64941e-07		Rab8a	2.57613e-90	0.444768	0.437	0.326	7.99966e-86		Dstn	3.44516e-27	0.112036	0.118	0.033	1.06983e-22		Ptpn7	9.90502e-12	0.322035	0.592	0.348	3.07581e-07
Snrpd3	1.73562e-205	0.420265	0.766	0.409	5.38964e-201		Eif3i	7.87285e-21	0.331086	0.915	0.684	2.44476e-16		Slc25a33	5.38804e-12	0.265364	0.438	0.15	1.67315e-07		Oard1	2.77928e-90	0.372104	0.198	0.068	8.63051e-86		Lockd	3.52968e-27	0.0714966	0.049	0.007	1.09607e-22		Nhsl2	1.02419e-11	0.0342335	0.028	0.002	3.18043e-07
Phb2	2.93764e-204	0.43921	0.793	0.454	9.12224e-200		Pfas	8.20249e-21	0.147519	0.2	0.06	2.54712e-16		Serf1	5.66134e-12	0.16905	0.202	0.045	1.75802e-07		Cd27	3.43119e-90	0.423345	0.471	0.336	1.06549e-85		Msrb1	3.92851e-27	0.133046	0.192	0.069	1.21992e-22		Add1	1.03076e-11	0.234488	0.284	0.123	3.20082e-07
Dis3	3.00123e-204	0.330899	0.303	0.069	9.31971e-200		Eif3g	8.35388e-21	0.357165	0.854	0.577	2.59413e-16		Tnip3	5.76913e-12	0.787312	0.258	0.073	1.79149e-07		Hcls1	7.68268e-90	0.414233	0.435	0.304	2.3857e-85		Cd1d1	3.99132e-27	0.137372	0.167	0.056	1.23943e-22		Cst3	1.06041e-11	0.289132	0.56	0.334	3.29288e-07
Glrx5	1.47782e-203	0.437584	0.714	0.365	4.58906e-199		Baz1a	8.60366e-21	0.349539	0.692	0.379	2.67169e-16		Sfpq	6.11787e-12	0.422599	0.966	0.668	1.89978e-07		Tmem234	1.50853e-89	0.422366	0.496	0.392	4.68445e-85		Acat1	4.90288e-27	0.208719	0.386	0.19	1.52249e-22		Tnfrsf13b	1.15747e-11	0.157534	0.156	0.05	3.59429e-07
Dcun1d5	7.8059e-203	0.414386	0.72	0.358	2.42397e-198		Csnk2a2	9.88581e-21	0.298665	0.6	0.309	3.06984e-16		Tomm5	6.33229e-12	0.471322	0.888	0.602	1.96637e-07		Syf2	1.67032e-89	0.413907	0.505	0.42	5.18685e-85		Esd	5.05597e-27	0.255026	0.642	0.408	1.57003e-22		2210011C24Rik	1.17585e-11	0.0547409	0.041	0.005	3.65136e-07
Kmt5a	2.40164e-202	0.385778	0.497	0.183	7.4578e-198		Trmt61a	1.09683e-20	0.247814	0.356	0.146	3.40598e-16		Gcsh	6.42314e-12	0.322621	0.539	0.213	1.99458e-07		Atp6v0e	1.69752e-89	0.321114	0.695	0.673	5.2713e-85		Tmem59	6.26297e-27	0.234246	0.71	0.456	1.94484e-22		Bin1	1.18529e-11	0.264715	0.394	0.195	3.68069e-07
Alyref	5.12275e-202	0.404159	0.627	0.279	1.59077e-197		Foxp4	1.1259e-20	0.225714	0.275	0.099	3.49627e-16		Abcf2	6.56674e-12	0.328915	0.596	0.25	2.03917e-07		Pcmtd1	2.38341e-89	0.390929	0.231	0.093	7.40119e-85		Pak1	7.04243e-27	0.072188	0.051	0.007	2.18689e-22		Rexo2	1.25542e-11	0.371833	0.587	0.391	3.89844e-07
Nus1	1.02344e-201	0.373088	0.481	0.172	3.1781e-197		Rrp8	1.32068e-20	0.196543	0.359	0.145	4.1011e-16		Dhx37	6.63264e-12	0.173126	0.202	0.045	2.05963e-07		Klrb1f	1.29452e-88	0.299314	0.12	0.018	4.01987e-84		Ilvbl	7.19706e-27	0.156501	0.24	0.096	2.2349e-22		Mindy2	1.56677e-11	0.237727	0.353	0.166	4.8653e-07
Mgat2	1.75171e-200	0.424845	0.703	0.347	5.4396e-196		Mettl16	1.50109e-20	0.27073	0.498	0.238	4.66134e-16		Bcl2l1	6.76304e-12	0.342263	0.506	0.194	2.10013e-07		Kmt2e	1.45697e-88	0.422727	0.51	0.408	4.52434e-84		Kxd1	7.83122e-27	0.1757	0.415	0.207	2.43183e-22		Map4k4	1.58052e-11	0.287747	0.532	0.301	4.908e-07
Abcf2	3.00015e-200	0.362755	0.445	0.15	9.31636e-196		Hnrnpc	2.0128e-20	0.31666	0.925	0.649	6.25034e-16		Esf1	7.39126e-12	0.462342	0.82	0.439	2.29521e-07		Clec2d	2.45518e-88	0.390728	0.634	0.586	7.62407e-84		Tmem234	8.01807e-27	0.248057	0.673	0.431	2.48985e-22		Lonp2	1.6282e-11	0.32043	0.33	0.16	5.05604e-07
Nufip1	5.99831e-199	0.341962	0.383	0.113	1.86266e-194		Chd1	2.15275e-20	0.270724	0.739	0.402	6.68494e-16		Eif1a	7.60768e-12	0.421361	0.742	0.373	2.36241e-07		Cd2	2.54296e-88	0.397871	0.531	0.413	7.89665e-84		Cox20	9.99651e-27	0.207113	0.372	0.178	3.10422e-22		Tln1	1.71146e-11	0.268867	0.688	0.451	5.31459e-07
Grpel1	5.65129e-198	0.403198	0.72	0.364	1.7549e-193		Pdap1	2.75458e-20	0.298644	0.675	0.367	8.55381e-16		Hsd17b12	7.82973e-12	0.351893	0.607	0.256	2.43137e-07		Ifngr1	6.95892e-88	0.364027	0.341	0.181	2.16095e-83		Tmco1	1.00215e-26	0.190074	0.378	0.181	3.11197e-22		Orai2	1.86559e-11	0.208075	0.22	0.086	5.79322e-07
Fam210a	7.99708e-197	0.31927	0.295	0.067	2.48333e-192		Fkbp4	2.94309e-20	0.326526	0.793	0.482	9.13919e-16		Nr4a3	8.2293e-12	0.271337	0.809	0.362	2.55544e-07		Akr1b10	7.13962e-88	0.311774	0.147	0.034	2.21706e-83		Ezr	1.23748e-26	0.252294	0.611	0.363	3.84275e-22		Mark2	1.89475e-11	0.304058	0.477	0.273	5.88377e-07
Sh2d2a	1.31527e-196	0.468239	0.702	0.381	4.08429e-192		Il6ra	3.22952e-20	0.159751	0.119	0.026	1.00286e-15		Eef1e1	8.27405e-12	0.392598	0.876	0.452	2.56934e-07		Pkp3	1.88129e-87	0.372415	0.291	0.139	5.84196e-83		Zbtb8os	1.53254e-26	0.194012	0.452	0.234	4.75901e-22		Myo1f	2.06834e-11	0.205566	0.266	0.111	6.42281e-07
Utp14a	1.69708e-196	0.393365	0.49	0.183	5.26995e-192		Ifrd1	3.80538e-20	0.280073	0.485	0.226	1.18168e-15		Snx9	8.31839e-12	0.0718172	0.067	0.006	2.58311e-07		Rflnb	2.88979e-87	0.290563	0.12	0.019	8.97367e-83		Rpl13a	1.79032e-26	0.228647	0.912	0.813	5.55949e-22		Crmp1	2.28867e-11	0.112779	0.06	0.011	7.10701e-07
Eif2b3	3.75184e-196	0.333531	0.317	0.08	1.16506e-191		Marcksl1	3.88065e-20	0.282294	0.261	0.095	1.20506e-15		Pfkp	9.70987e-12	0.381248	0.64	0.284	3.01521e-07		H2-M3	3.46687e-87	0.396308	0.26	0.121	1.07657e-82		Lbh	1.79672e-26	0.222889	0.561	0.314	5.57936e-22		Gm26802	2.37649e-11	0.0202357	0.005	0	7.37971e-07
Kti12	1.27447e-195	0.370358	0.512	0.195	3.95763e-191		Igtp	3.99625e-20	0.545819	0.617	0.36	1.24096e-15		Cd9	9.74462e-12	0.456342	0.427	0.158	3.026e-07		Rbm39	3.48964e-87	0.265414	0.885	0.913	1.08364e-82		Arhgap30	1.97713e-26	0.234693	0.668	0.409	6.13959e-22		Kit	2.37649e-11	0.0112599	0.005	0	7.37971e-07
Sms	2.22943e-195	0.422586	0.624	0.29	6.92305e-191		Noc2l	4.55681e-20	0.285406	0.654	0.359	1.41503e-15		Nudc	1.01378e-11	0.480307	0.899	0.538	3.1481e-07		Rab21	6.18449e-87	0.414359	0.488	0.394	1.92047e-82		Smim4	2.25186e-26	0.174562	0.235	0.095	6.9927e-22		Cdc42bpb	2.37649e-11	0.0112599	0.005	0	7.37971e-07
Ssr1	3.96462e-195	0.404308	0.631	0.288	1.23113e-190		Snrpa1	4.78547e-20	0.310172	0.786	0.467	1.48603e-15		Rpl22l1	1.03404e-11	0.372324	0.989	0.867	3.21101e-07		Rabgap1l	8.38126e-87	0.446105	0.351	0.215	2.60263e-82		Dera	2.63646e-26	0.172926	0.261	0.112	8.18701e-22		Gm16548	2.37649e-11	0.010998	0.005	0	7.37971e-07
Naa25	1.424e-194	0.332181	0.32	0.081	4.42196e-190		Tgfb1	4.80927e-20	0.277128	0.837	0.516	1.49342e-15		Gm5907	1.04468e-11	0.165098	0.022	0.001	3.24405e-07		Ifitm10	1.91121e-86	0.24454	0.097	0.008	5.93488e-82		Rab19	3.22993e-26	0.144593	0.278	0.117	1.00299e-21		Pparg	2.37649e-11	0.0107834	0.005	0	7.37971e-07
Kdelr2	1.71734e-194	0.371923	0.585	0.243	5.33286e-190		Abcf2	5.03365e-20	0.25052	0.508	0.245	1.5631e-15		Tgm3	1.04468e-11	0.0359521	0.022	0.001	3.24405e-07		Msn	2.29014e-86	0.363038	0.611	0.541	7.11156e-82		Smim8	3.30801e-26	0.157654	0.24	0.097	1.02724e-21		Cers3	2.37649e-11	0.00960279	0.005	0	7.37971e-07
Ntmt1	3.79074e-194	0.312033	0.311	0.076	1.17714e-189		Hnrnpa0	5.41026e-20	0.290971	0.973	0.826	1.68005e-15		Ap1s3	1.04714e-11	0.238377	0.247	0.064	3.25168e-07		Zcchc18	3.99662e-86	0.344816	0.168	0.048	1.24107e-81		Atraid	3.47887e-26	0.167911	0.295	0.129	1.08029e-21		Cdh10	2.37649e-11	0.00960279	0.005	0	7.37971e-07
Prdx1	1.05499e-193	0.401354	0.884	0.598	3.27608e-189		Nop14	5.44604e-20	0.277004	0.569	0.292	1.69116e-15		Gm5106	1.08144e-11	0.0265337	0.022	0.001	3.35819e-07		Tnfrsf1a	4.38408e-86	0.383458	0.236	0.102	1.36139e-81		Bcl11b	4.19671e-26	0.238255	0.747	0.485	1.30321e-21		Olfr527	2.37649e-11	0.00958874	0.005	0	7.37971e-07
Llph	1.3627e-193	0.424029	0.824	0.49	4.23161e-189		Rpl31	5.50666e-20	0.266776	0.976	0.829	1.70998e-15		Smtn	1.08679e-11	0.0229427	0.022	0.001	3.37482e-07		Padi2	5.83705e-86	0.364595	0.191	0.066	1.81258e-81		H2-DMa	4.83803e-26	0.14261	0.164	0.056	1.50235e-21		Plau	2.37649e-11	0.00393008	0.005	0	7.37971e-07
Dusp5	2.49144e-193	0.543245	0.477	0.19	7.73668e-189		Socs1	5.53844e-20	0.482669	0.705	0.429	1.71985e-15		Ddx27	1.14436e-11	0.403578	0.764	0.382	3.55357e-07		Abr	8.45124e-86	0.348507	0.178	0.056	2.62436e-81		Igf2r	8.31794e-26	0.184895	0.21	0.083	2.58297e-21		Cdc42ep3	2.52218e-11	0.258305	0.459	0.24	7.83213e-07
Txnl1	4.32476e-193	0.390501	0.746	0.392	1.34297e-188		Cd5	5.67262e-20	0.323167	0.447	0.21	1.76152e-15		Rwdd4a	1.30229e-11	0.32784	0.596	0.237	4.04401e-07		Zfp652	1.53401e-85	0.405928	0.272	0.134	4.76358e-81		Itgb3bp	8.60863e-26	0.130168	0.146	0.047	2.67324e-21		Ppp1ca	2.58549e-11	0.285699	0.839	0.667	8.02872e-07
Iars	8.62791e-193	0.32856	0.345	0.095	2.67923e-188		Strap	6.33374e-20	0.311551	0.773	0.477	1.96682e-15		Wdr12	1.30535e-11	0.339633	0.607	0.257	4.0535e-07		Myh9	1.75922e-85	0.41909	0.468	0.344	5.46291e-81		Lmna	9.2568e-26	0.09338	0.046	0.006	2.87451e-21		Inpp1	2.66354e-11	0.189314	0.312	0.137	8.2711e-07
Nol10	1.09968e-192	0.307095	0.285	0.064	3.41483e-188		Ddx39	6.65357e-20	0.3077	0.712	0.422	2.06613e-15		Psmb7	1.44946e-11	0.32468	0.775	0.354	4.50101e-07		Rgs3	1.96607e-85	0.426426	0.32	0.182	6.10524e-81		Bbc3	9.85163e-26	0.104835	0.095	0.024	3.05923e-21		Ndufb10	2.73745e-11	0.262727	0.752	0.494	8.5006e-07
Glrx3	1.29636e-192	0.411819	0.72	0.379	4.02558e-188		Grpel1	6.82427e-20	0.315222	0.78	0.479	2.11914e-15		Cdk6	1.4847e-11	0.267087	0.281	0.08	4.61043e-07		Ptbp3	2.3527e-85	0.403038	0.548	0.486	7.30585e-81		Stim1	1.10959e-25	0.203348	0.353	0.172	3.4456e-21		Rpl17	2.74114e-11	0.134937	1	1	8.51207e-07
Nasp	6.58567e-192	0.383279	0.565	0.236	2.04505e-187		Ehd1	7.33546e-20	0.292557	0.468	0.22	2.27788e-15		Cct2	1.5249e-11	0.378976	0.989	0.716	4.73527e-07		Rab19	4.15742e-85	0.33709	0.187	0.062	1.291e-80		Zbp1	1.26529e-25	0.211387	0.445	0.232	3.92911e-21		Rasgrp1	3.18357e-11	0.296799	0.601	0.371	9.88594e-07
Pusl1	9.27721e-192	0.277314	0.241	0.043	2.88085e-187		Mettl1	7.75793e-20	0.257953	0.403	0.177	2.40907e-15		Alcam	1.52695e-11	0.278804	0.124	0.02	4.74163e-07		Wwp1	4.94196e-85	0.389039	0.235	0.1	1.53463e-80		Gm2682	1.3157e-25	0.235745	0.762	0.5	4.08566e-21		Hdac5	3.455e-11	0.136535	0.124	0.036	1.07288e-06
Tmem248	1.44968e-191	0.342589	0.409	0.131	4.5017e-187		Bri3	8.03974e-20	0.29028	0.698	0.378	2.49658e-15		Hdlbp	1.53132e-11	0.446539	0.674	0.317	4.7552e-07		Mdh1	6.58465e-85	0.405664	0.494	0.398	2.04473e-80		Nfatc3	1.5572e-25	0.209796	0.436	0.228	4.83556e-21		Xiap	3.46551e-11	0.260696	0.404	0.21	1.07615e-06
Canx	4.78097e-191	0.404975	0.748	0.4	1.48463e-186		Rpl7	8.04438e-20	0.158635	1	0.999	2.49802e-15		Vsir	1.53404e-11	0.419447	0.843	0.459	4.76367e-07		Ing1	7.20632e-85	0.430472	0.29	0.155	2.23778e-80		Mdp1	1.58891e-25	0.208741	0.441	0.232	4.93403e-21		Ppdpf	3.50977e-11	0.321301	0.546	0.331	1.08989e-06
Twistnb	3.103e-190	0.389502	0.717	0.359	9.63574e-186		Esf1	8.84947e-20	0.303538	0.746	0.433	2.74803e-15		G3bp1	1.56314e-11	0.400157	0.978	0.721	4.85403e-07		Uqcc3	8.73356e-85	0.39103	0.313	0.175	2.71203e-80		Trappc1	1.75418e-25	0.149539	0.273	0.117	5.44726e-21		Hexb	3.65535e-11	0.198829	0.165	0.057	1.13509e-06
Mettl13	5.18061e-190	0.30854	0.242	0.044	1.60873e-185		Zc3h15	9.34188e-20	0.322622	0.817	0.502	2.90093e-15		Sco2	1.57345e-11	0.334167	0.472	0.179	4.88604e-07		Ndufa2	9.9036e-85	0.384516	0.548	0.48	3.07537e-80		Hdac5	2.2982e-25	0.0951261	0.115	0.032	7.1366e-21		Dctn1	3.74254e-11	0.184757	0.211	0.081	1.16217e-06
Arl5b	2.4388e-189	0.328262	0.259	0.052	7.5732e-185		Ipo5	9.72845e-20	0.315112	0.522	0.266	3.02098e-15		Eef1akmt4	1.65934e-11	0.203235	0.27	0.074	5.15274e-07		Rps7	1.06084e-84	0.116962	1	0.999	3.29424e-80		Orai2	2.30172e-25	0.161069	0.207	0.081	7.14752e-21		Adrb1	4.07269e-11	0.0657058	0.037	0.004	1.26469e-06
Riox1	1.65167e-188	0.333099	0.418	0.138	5.12893e-184		Vsir	9.7622e-20	0.320559	0.749	0.454	3.03146e-15		Fabp5	1.67812e-11	0.347588	0.551	0.22	5.21107e-07		Inpp1	1.30308e-84	0.354984	0.202	0.074	4.04645e-80		Tcrg-C4	2.73149e-25	0.250603	0.286	0.131	8.48209e-21		Tlr1	4.51409e-11	0.0825662	0.055	0.009	1.40176e-06
Polr2h	1.22546e-187	0.372562	0.531	0.214	3.80542e-183		Slc16a1	1.09622e-19	0.222353	0.42	0.185	3.40408e-15		Nfkbib	1.70577e-11	0.368871	0.73	0.33	5.29692e-07		Tcf12	2.25445e-84	0.461415	0.39	0.271	7.00076e-80		Smap1	2.98098e-25	0.233195	0.547	0.314	9.25684e-21		Xlr4c	5.22491e-11	0.170101	0.193	0.072	1.62249e-06
Spata5	1.93007e-187	0.316283	0.324	0.087	5.99346e-183		Npm3	1.23075e-19	0.343708	0.841	0.553	3.82185e-15		Abhd14a	1.71739e-11	0.142982	0.157	0.03	5.333e-07		Was	2.49841e-84	0.417295	0.341	0.207	7.7583e-80		Fry	3.14346e-25	0.0558972	0.04	0.005	9.7614e-21		Mr1	5.24748e-11	0.102997	0.078	0.017	1.6295e-06
Gart	2.55966e-187	0.345313	0.403	0.133	7.94851e-183		Tomm70a	1.50383e-19	0.302268	0.61	0.317	4.66983e-15		Larp1b	1.89427e-11	0.34605	0.393	0.133	5.88229e-07		Rora	2.66856e-84	0.39831	0.468	0.319	8.28667e-80		Hspb11	3.27685e-25	0.12116	0.12	0.035	1.01756e-20		Cd47	5.26323e-11	0.22979	0.89	0.699	1.63439e-06
Txnl4a	1.75775e-185	0.39779	0.57	0.246	5.45834e-181		Mrpl20	1.61138e-19	0.310484	0.831	0.528	5.00382e-15		Gm26917	1.90522e-11	0.477439	0.921	0.628	5.91628e-07		mt-Cytb	5.86803e-84	0.125178	1	1	1.8222e-79		Twf2	3.53898e-25	0.192591	0.45	0.232	1.09896e-20		Smap2	5.56397e-11	0.283842	0.459	0.254	1.72778e-06
Vapa	2.12366e-185	0.389249	0.788	0.446	6.5946e-181		Gabpb1	1.76528e-19	0.293135	0.434	0.209	5.48173e-15		Syne3	2.03498e-11	0.0462044	0.034	0.002	6.31923e-07		Sept6	8.51426e-84	0.416158	0.469	0.362	2.64393e-79		Dck	4.1123e-25	0.102569	0.1	0.026	1.27699e-20		Grap2	5.85471e-11	0.230554	0.33	0.152	1.81806e-06
Alkbh1	5.9552e-185	0.382097	0.526	0.213	1.84927e-180		Sar1a	1.79984e-19	0.274019	0.769	0.434	5.58904e-15		Ncs1	2.07737e-11	0.20467	0.18	0.039	6.45087e-07		Slc12a6	9.83964e-84	0.346676	0.192	0.068	3.0555e-79		Ebp	4.31408e-25	0.201022	0.425	0.221	1.33965e-20		Dus2	5.87689e-11	0.178374	0.179	0.065	1.82495e-06
Dctpp1	2.10556e-184	0.390706	0.403	0.137	6.5384e-180		Pdia6	1.81651e-19	0.346299	0.875	0.616	5.64082e-15		Pde5a	2.08893e-11	0.0436778	0.034	0.002	6.48676e-07		Cdk5rap3	1.08184e-83	0.417692	0.313	0.181	3.35943e-79		Klf13	4.99356e-25	0.244698	0.561	0.322	1.55065e-20		Myo18a	6.10897e-11	0.132534	0.133	0.041	1.89702e-06
Ddx39	2.12697e-184	0.407013	0.649	0.314	6.60487e-180		Larp1	1.97191e-19	0.354616	0.739	0.443	6.12337e-15		Rrp15	2.08952e-11	0.35755	0.719	0.333	6.4886e-07		Gm12216	1.19147e-83	0.388131	0.229	0.097	3.69986e-79		Taok3	5.25065e-25	0.161066	0.389	0.19	1.63048e-20		Ssh2	6.21786e-11	0.241478	0.284	0.128	1.93083e-06
Baz1a	1.51043e-183	0.418059	0.601	0.274	4.69035e-179		Mrpl50	2.23055e-19	0.239956	0.475	0.221	6.92651e-15		Phf6	2.10142e-11	0.325107	0.472	0.176	6.52555e-07		Utrn	1.89674e-83	0.421904	0.486	0.38	5.88994e-79		Scand1	5.74005e-25	0.21149	0.777	0.524	1.78246e-20		Itgb5	6.41089e-11	0.0199611	0.009	0	1.99078e-06
Cct4	2.64022e-182	0.395613	0.859	0.554	8.19867e-178		Ier3	2.68053e-19	0.388022	0.197	0.064	8.32385e-15		Zfp593	2.10297e-11	0.353997	0.652	0.296	6.53035e-07		Ifi206	2.06852e-83	0.393303	0.222	0.089	6.42338e-79		Crmp1	6.32118e-25	0.0709499	0.054	0.009	1.96292e-20		Fstl4	6.46997e-11	0.0264889	0.009	0	2.00912e-06
Tnip3	2.69927e-182	0.42311	0.178	0.019	8.38205e-178		Slamf1	2.71816e-19	0.286943	0.539	0.271	8.4407e-15		Ndufaf4	2.25799e-11	0.421801	0.708	0.347	7.01174e-07		Hsd11b1	2.37974e-83	0.374582	0.235	0.101	7.38979e-79		Ampd3	6.35045e-25	0.0413625	0.023	0.001	1.97201e-20		Il7	6.52959e-11	0.0218119	0.009	0	2.02763e-06
Metap2	3.17848e-182	0.388067	0.667	0.319	9.87014e-178		Hsp90b1	2.99261e-19	0.346166	0.942	0.777	9.29294e-15		Nap1l1	2.26058e-11	0.428901	0.865	0.534	7.01979e-07		Eid1	2.44843e-83	0.39325	0.284	0.147	7.60312e-79		Rnasel	6.45844e-25	0.136797	0.252	0.105	2.00554e-20		Prss12	6.52959e-11	0.0136152	0.009	0	2.02763e-06
Phb	6.52422e-181	0.341042	0.427	0.149	2.02597e-176		Mapk6	3.10818e-19	0.252734	0.447	0.211	9.65183e-15		Rel	2.30091e-11	0.451854	0.775	0.397	7.145e-07		1810011H11Rik	2.82308e-83	0.383423	0.241	0.105	8.7665e-79		Bend5	6.51822e-25	0.0437337	0.023	0.001	2.0241e-20		Gm26583	6.52959e-11	0.00902598	0.009	0	2.02763e-06
Tcerg1	6.84437e-181	0.371694	0.515	0.207	2.12538e-176		Pfdn4	3.13781e-19	0.256255	0.664	0.353	9.74385e-15		Pgk1	2.3073e-11	0.390482	0.843	0.477	7.16486e-07		Herc3	3.33398e-83	0.311074	0.148	0.037	1.0353e-78		Ascc1	6.61685e-25	0.157658	0.195	0.075	2.05473e-20		Zfp36	6.6565e-11	0.299637	0.353	0.178	2.06704e-06
Imp3	7.08029e-181	0.393833	0.812	0.498	2.19864e-176		Bysl	3.62653e-19	0.196067	0.431	0.188	1.12615e-14		Hnrnpc	2.34862e-11	0.412806	0.933	0.654	7.29316e-07		Phf14	4.39229e-83	0.399069	0.301	0.164	1.36394e-78		Rnf125	7.38656e-25	0.144942	0.172	0.062	2.29375e-20		Evl	7.14266e-11	0.262521	0.624	0.374	2.21801e-06
Tcof1	1.93717e-180	0.373522	0.543	0.229	6.01551e-176		Isy1	3.66951e-19	0.283183	0.651	0.35	1.13949e-14		Eif2s1	2.55436e-11	0.408633	0.899	0.536	7.93207e-07		Pold4	7.53773e-83	0.387897	0.244	0.11	2.34069e-78		Zfp36	8.02565e-25	0.235197	0.343	0.17	2.4922e-20		Tnfaip8l2	7.49583e-11	0.279185	0.367	0.18	2.32768e-06
Bcat1	2.54902e-179	0.2275	0.152	0.01	7.91548e-175		Rrp12	3.78088e-19	0.178019	0.217	0.072	1.17408e-14		Rars	2.87257e-11	0.374231	0.719	0.345	8.92019e-07		Rps3	1.52256e-82	0.113908	0.999	1	4.72801e-78		Pold4	8.73007e-25	0.158966	0.353	0.168	2.71095e-20		Ech1	7.57399e-11	0.226113	0.404	0.202	2.35195e-06
Nmd3	2.95994e-179	0.335838	0.461	0.169	9.19152e-175		9130401M01Rik	3.844e-19	0.243742	0.403	0.182	1.19368e-14		Prdx1	2.96957e-11	0.439079	0.933	0.696	9.2214e-07		Antxr2	1.91262e-82	0.309318	0.15	0.039	5.93925e-78		Pmm1	9.43798e-25	0.117803	0.106	0.029	2.93078e-20		G430095P16Rik	7.99276e-11	0.0781113	0.055	0.01	2.48199e-06
Cox5a	7.05921e-179	0.353621	0.949	0.767	2.1921e-174		Aatf	4.12122e-19	0.279167	0.515	0.257	1.27976e-14		Naa20	3.17665e-11	0.429802	0.708	0.348	9.86445e-07		Pdlim2	2.40743e-82	0.353321	0.227	0.095	7.47578e-78		Pla2g16	9.96948e-25	0.258876	0.74	0.512	3.09582e-20		Rplp0	8.86436e-11	0.158203	1	0.999	2.75265e-06
Wdr77	9.00675e-179	0.311397	0.349	0.103	2.79686e-174		Dnajc21	4.6196e-19	0.28375	0.644	0.352	1.43452e-14		Ubxn4	3.28728e-11	0.461997	0.809	0.446	1.0208e-06		Plcg1	2.68628e-82	0.368225	0.212	0.085	8.34172e-78		Snn	1.13532e-24	0.040998	0.026	0.002	3.5255e-20		Cfl1	9.28037e-11	0.231056	0.977	0.944	2.88183e-06
Pprc1	1.70367e-178	0.305061	0.28	0.067	5.2904e-174		Gart	4.64692e-19	0.25407	0.464	0.22	1.44301e-14		Surf6	3.32378e-11	0.197927	0.326	0.098	1.03213e-06		Coro2a	5.54846e-82	0.397659	0.248	0.112	1.72296e-77		Csk	1.15428e-24	0.230734	0.63	0.395	3.58439e-20		Spock2	9.48524e-11	0.0219526	0.018	0.001	2.94545e-06
Pus1	5.96727e-178	0.327446	0.405	0.137	1.85302e-173		Noct	4.76315e-19	0.130188	0.234	0.08	1.4791e-14		Oaf	3.96965e-11	0.0975845	0.067	0.007	1.23269e-06		Rb1cc1	7.63265e-82	0.450769	0.335	0.202	2.37017e-77		mt-Nd3	1.17573e-24	0.198772	0.963	0.917	3.651e-20		Maz	9.59738e-11	0.333411	0.399	0.219	2.98027e-06
Il6st	1.87781e-177	0.31945	0.238	0.045	5.83117e-173		Nfkb2	4.83355e-19	0.265211	0.505	0.247	1.50096e-14		Rufy3	3.97046e-11	0.138387	0.157	0.031	1.23295e-06		Klhl24	1.21725e-81	0.349696	0.197	0.071	3.77994e-77		Ccr4	1.40147e-24	0.165569	0.141	0.047	4.35198e-20		Grk6	9.73054e-11	0.247711	0.353	0.177	3.02162e-06
Gemin5	1.99065e-177	0.303907	0.288	0.071	6.18158e-173		Prelid2	4.95714e-19	0.142225	0.081	0.015	1.53934e-14		Ppp2ca	4.17422e-11	0.37582	0.955	0.618	1.29622e-06		Nfatc2	4.00741e-81	0.329926	0.171	0.054	1.24442e-76		Cd81	1.58386e-24	0.146073	0.157	0.055	4.91835e-20		Arl6ip5	1.00204e-10	0.262439	0.628	0.386	3.11164e-06
Marcksl1	1.07071e-176	0.345105	0.218	0.037	3.32489e-172		Ezh2	5.04604e-19	0.211868	0.275	0.104	1.56695e-14		Nab2	4.23188e-11	0.349787	0.573	0.241	1.31412e-06		Thap3	6.88746e-81	0.328516	0.181	0.061	2.13876e-76		Taldo1	2.14621e-24	0.241672	0.745	0.504	6.66462e-20		2610037D02Rik	1.14495e-10	0.260036	0.298	0.139	3.55542e-06
Polr3h	1.95197e-176	0.286205	0.255	0.055	6.06145e-172		Dcun1d5	5.05834e-19	0.312566	0.786	0.475	1.57077e-14		Wdr43	4.25252e-11	0.375779	0.798	0.418	1.32053e-06		Kdm2a	9.98094e-81	0.423927	0.373	0.246	3.09938e-76		Frmd8	2.4381e-24	0.148946	0.286	0.126	7.57103e-20		4833420G17Rik	1.16451e-10	0.237073	0.436	0.23	3.61617e-06
Zbtb16	5.77193e-176	0.429425	0.558	0.251	1.79236e-171		Utp15	5.1797e-19	0.224455	0.383	0.166	1.60845e-14		Card10	4.31773e-11	0.0458831	0.056	0.005	1.34078e-06		Ccdc12	1.73426e-80	0.369579	0.531	0.458	5.3854e-76		Mrps16	3.1653e-24	0.234262	0.499	0.291	9.82921e-20		Rapgef4	1.18744e-10	0.0954516	0.073	0.016	3.68736e-06
Pdcd11	6.47681e-176	0.330398	0.337	0.098	2.01124e-171		Spata5	5.18097e-19	0.224072	0.376	0.163	1.60885e-14		Nol9	4.39461e-11	0.196466	0.427	0.146	1.36466e-06		Tnip1	5.25525e-80	0.350321	0.193	0.071	1.63191e-75		Cytip	3.24526e-24	0.202051	0.593	0.339	1.00775e-19		Inpp5d	1.29579e-10	0.25445	0.349	0.172	4.02383e-06
Arf6	7.38627e-176	0.352264	0.608	0.276	2.29366e-171		Adk	5.87188e-19	0.14206	0.18	0.054	1.82339e-14		Gbp4	4.54145e-11	0.853514	0.573	0.283	1.41026e-06		Mylip	5.56556e-80	0.39366	0.23	0.102	1.72827e-75		Zfp386	3.25517e-24	0.147967	0.169	0.061	1.01083e-19		Idh1	1.35552e-10	0.0724918	0.046	0.007	4.20928e-06
Mydgf	2.19649e-175	0.370828	0.563	0.247	6.82076e-171		Sssca1	5.98458e-19	0.300016	0.61	0.319	1.85839e-14		Cks2	4.84647e-11	0.301421	0.371	0.125	1.50497e-06		Herpud1	5.61129e-80	0.410393	0.383	0.255	1.74247e-75		Slc12a6	4.00689e-24	0.159956	0.28	0.123	1.24426e-19		Fut7	1.37176e-10	0.0531199	0.032	0.004	4.25974e-06
Eif3d	2.84693e-174	0.391253	0.752	0.417	8.84058e-170		Srsf10	6.59718e-19	0.28507	0.742	0.442	2.04862e-14		Kcnq1ot1	5.18322e-11	0.536222	0.921	0.67	1.60954e-06		Samd9l	6.82426e-80	0.37364	0.242	0.108	2.11914e-75		Rps15	4.98515e-24	0.143644	1	0.996	1.54804e-19		2610008E11Rik	1.39774e-10	0.157955	0.128	0.039	4.34041e-06
Hnrnpdl	2.99874e-174	0.39439	0.774	0.438	9.31198e-170		Ggta1	6.64406e-19	0.15669	0.132	0.033	2.06318e-14		Naa25	5.28909e-11	0.273782	0.438	0.162	1.64242e-06		H2-Q6	7.46134e-80	0.426218	0.479	0.382	2.31697e-75		Rexo5	5.6105e-24	0.127077	0.135	0.044	1.74223e-19		Map4	1.42365e-10	0.210282	0.197	0.077	4.42085e-06
Srxn1	9.77199e-174	0.384379	0.171	0.018	3.0345e-169		Igfbp4	6.8594e-19	0.192088	0.105	0.023	2.13005e-14		Nars	5.44098e-11	0.390827	0.663	0.31	1.68959e-06		Lasp1	9.23059e-80	0.380418	0.262	0.131	2.86638e-75		Sirt7	6.90475e-24	0.179369	0.504	0.278	2.14413e-19		Fbxo17	1.44239e-10	0.199308	0.128	0.04	4.47907e-06
Cinp	1.39214e-173	0.307253	0.299	0.079	4.32302e-169		Sema7a	6.9552e-19	0.266486	0.424	0.196	2.1598e-14		Tgfb1	5.63173e-11	0.414765	0.876	0.522	1.74882e-06		Srpk2	1.45367e-79	0.369831	0.278	0.143	4.51407e-75		Suclg1	7.29659e-24	0.244127	0.647	0.417	2.26581e-19		Stk10	1.46134e-10	0.253826	0.431	0.232	4.53788e-06
Lrrc59	1.2383e-172	0.319796	0.457	0.17	3.84528e-168		Rangrf	6.99299e-19	0.170878	0.224	0.076	2.17153e-14		Eif1ad	5.80806e-11	0.286102	0.584	0.243	1.80358e-06		Nipbl	1.54193e-79	0.430248	0.442	0.334	4.78816e-75		Crtc3	9.5863e-24	0.190202	0.435	0.228	2.97683e-19		Tecpr1	1.49031e-10	0.283947	0.541	0.309	4.62787e-06
Mthfd1	1.3326e-172	0.2974	0.279	0.069	4.13812e-168		Creld2	7.67866e-19	0.185153	0.305	0.119	2.38445e-14		Tcerg1	6.19034e-11	0.366438	0.663	0.311	1.92229e-06		Irf2	4.79604e-79	0.424064	0.379	0.256	1.48931e-74		Tubb5	1.04032e-23	0.276156	0.783	0.572	3.23049e-19		Spef2	1.54792e-10	0.0900955	0.055	0.01	4.80674e-06
Mettl16	1.39109e-172	0.328474	0.424	0.151	4.31976e-168		Hsd17b12	7.90956e-19	0.235376	0.515	0.251	2.45616e-14		Fam83g	6.21757e-11	0.180916	0.146	0.028	1.93074e-06		Ndufb9	8.72945e-79	0.333087	0.594	0.562	2.71076e-74		Higd2a	1.1284e-23	0.190529	0.504	0.281	3.50401e-19		Zzef1	1.58108e-10	0.24359	0.275	0.126	4.90974e-06
Uap1	4.05304e-172	0.29656	0.281	0.07	1.25859e-167		Prmt1	8.11671e-19	0.310549	0.82	0.526	2.52048e-14		Slc35f2	6.36424e-11	0.177358	0.191	0.044	1.97629e-06		Dock8	9.85527e-79	0.38407	0.28	0.148	3.06036e-74		Cklf	1.19832e-23	0.160355	0.469	0.25	3.72116e-19		mt-Nd3	1.65857e-10	0.252661	0.936	0.92	5.15036e-06
Crtam	6.51479e-172	0.618341	0.146	0.01	2.02304e-167		Rbm34	8.17387e-19	0.244945	0.458	0.213	2.53823e-14		Ccr8	6.88476e-11	0.0617457	0.034	0.002	2.13792e-06		Rbms1	1.01113e-78	0.407288	0.346	0.215	3.13986e-74		Syne1	1.26053e-23	0.133922	0.186	0.071	3.91432e-19		Pard3	1.70949e-10	0.0440608	0.014	0.001	5.30849e-06
Agpat5	1.03313e-171	0.354253	0.447	0.17	3.20818e-167		Heatr3	8.63304e-19	0.202381	0.295	0.116	2.68082e-14		Vps37a	7.10772e-11	0.34255	0.438	0.168	2.20716e-06		Tubb5	2.00824e-78	0.354613	0.615	0.554	6.23619e-74		Ms4a6b	1.26927e-23	0.237418	0.911	0.743	3.94147e-19		Sprn	1.71462e-10	0.0243055	0.014	0.001	5.3244e-06
Slc38a1	4.84041e-171	0.469191	0.827	0.522	1.50309e-166		1810022K09Rik	9.36559e-19	0.29345	0.631	0.356	2.9083e-14		Per1	7.23264e-11	0.219677	0.258	0.072	2.24595e-06		Idnk	3.76951e-78	0.412474	0.441	0.336	1.17055e-73		Ap2s1	1.33307e-23	0.183927	0.472	0.26	4.13959e-19		Thra	1.73736e-10	0.150928	0.138	0.044	5.39503e-06
Sub1	1.2783e-170	0.430702	0.986	0.933	3.96951e-166		Zap70	9.75956e-19	0.303158	0.875	0.592	3.03063e-14		Ece1	7.57079e-11	0.200146	0.225	0.057	2.35096e-06		Rnaseh2c	4.96664e-78	0.382574	0.531	0.472	1.54229e-73		Rpl23a	1.8281e-23	0.159397	0.995	0.985	5.6768e-19		Ypel3	1.74179e-10	0.24844	0.482	0.265	5.4088e-06
Noct	1.25962e-169	0.259651	0.19	0.028	3.91151e-165		Hspa4l	1.02142e-18	0.271677	0.217	0.076	3.17182e-14		Nfatc1	7.8876e-11	0.357817	0.652	0.3	2.44934e-06		Tmem9b	5.90521e-78	0.340636	0.209	0.085	1.83374e-73		Mpst	1.98038e-23	0.118768	0.175	0.065	6.14967e-19		Cd8a	1.76668e-10	0.0200045	0.014	0.001	5.48606e-06
Mapkapk2	1.62016e-169	0.407574	0.52	0.222	5.03107e-165		Amd1	1.14678e-18	0.206432	0.427	0.189	3.5611e-14		Gart	7.95542e-11	0.344375	0.539	0.224	2.4704e-06		Zbtb4	7.78943e-78	0.312968	0.157	0.046	2.41885e-73		Tmem71	2.24274e-23	0.123549	0.203	0.079	6.96437e-19		Il16	1.79161e-10	0.240532	0.472	0.254	5.56348e-06
Wdr61	2.21387e-169	0.349868	0.505	0.208	6.87473e-165		Ipo7	1.16518e-18	0.238455	0.478	0.23	3.61823e-14		Aprt	7.97344e-11	0.371548	0.91	0.526	2.47599e-06		Chmp1a	8.78179e-78	0.385427	0.267	0.138	2.72701e-73		Crybg1	2.35845e-23	0.166942	0.204	0.083	7.32369e-19		Aagab	1.8362e-10	0.186688	0.179	0.067	5.70196e-06
Stat5a	6.84562e-169	0.444634	0.337	0.107	2.12577e-164		Rbm17	1.16606e-18	0.268911	0.644	0.342	3.62097e-14		Srsf6	8.33817e-11	0.412663	0.921	0.561	2.58925e-06		Ralbp1	1.58835e-77	0.430176	0.324	0.197	4.93231e-73		Srpk2	2.70376e-23	0.190623	0.396	0.201	8.396e-19		Wdr26	1.91856e-10	0.294758	0.532	0.339	5.9577e-06
Adss	7.24396e-169	0.380186	0.659	0.327	2.24947e-164		Odc1	1.35979e-18	0.237764	0.79	0.46	4.22254e-14		Eif5	8.47947e-11	0.410039	0.978	0.79	2.63313e-06		Tigd2	2.77176e-77	0.392697	0.265	0.136	8.60715e-73		Hadh	4.03081e-23	0.160696	0.255	0.112	1.25169e-18		Taok3	2.00001e-10	0.246517	0.381	0.199	6.21063e-06
Naa15	1.10591e-168	0.370781	0.599	0.279	3.43418e-164		Plk3	1.44134e-18	0.21091	0.359	0.154	4.47578e-14		Camk2d	8.92032e-11	0.47342	0.64	0.316	2.77003e-06		Arsb	3.54211e-77	0.404737	0.268	0.139	1.09993e-72		Nenf	4.15455e-23	0.10974	0.121	0.038	1.29011e-18		mt-Nd2	2.73016e-10	0.156388	1	0.999	8.47798e-06
Nol8	1.16877e-168	0.348313	0.445	0.169	3.62939e-164		Pinx1	1.54873e-18	0.205567	0.356	0.151	4.80927e-14		Wdr75	9.59258e-11	0.324194	0.64	0.277	2.97878e-06		Tapbpl	4.83569e-77	0.384836	0.295	0.162	1.50163e-72		Ripk3	5.15695e-23	0.14428	0.201	0.082	1.60139e-18		Srpk2	2.76227e-10	0.223099	0.408	0.21	8.57767e-06
Nol11	1.19062e-168	0.345419	0.512	0.211	3.69724e-164		Rps12	1.63257e-18	0.166438	1	0.999	5.06963e-14		Nfkbiz	1.06408e-10	0.576037	0.539	0.245	3.30429e-06		Senp7	5.36013e-77	0.34216	0.195	0.074	1.66448e-72		Ccdc12	5.95256e-23	0.226206	0.711	0.481	1.84845e-18		B3gat3	3.02605e-10	0.249901	0.284	0.132	9.39681e-06
Txnrd3	3.16472e-168	0.231553	0.17	0.019	9.82742e-164		Gm43057	1.77256e-18	0.0229944	0.017	0.001	5.50432e-14		Llph	1.1052e-10	0.396248	0.955	0.603	3.43197e-06		Prrc2b	6.21149e-77	0.393727	0.28	0.15	1.92885e-72		Parp3	7.09348e-23	0.128351	0.157	0.056	2.20274e-18		2810474O19Rik	3.11082e-10	0.353664	0.606	0.392	9.66003e-06
Cdca7	3.26957e-168	0.271627	0.205	0.035	1.0153e-163		Thumpd1	1.8907e-18	0.24805	0.529	0.267	5.87118e-14		Zdhhc13	1.20966e-10	0.175882	0.225	0.058	3.75636e-06		S1pr4	7.15167e-77	0.348516	0.221	0.094	2.22081e-72		Plgrkt	7.34301e-23	0.235182	0.613	0.378	2.28022e-18		Acads	3.20231e-10	0.201606	0.243	0.104	9.94413e-06
Nars	3.70443e-168	0.353037	0.506	0.21	1.15034e-163		Snrpa	1.99488e-18	0.232992	0.512	0.252	6.1947e-14		Rheb	1.26437e-10	0.388008	0.921	0.558	3.92624e-06		Rpl26	8.13884e-77	0.123053	0.999	1	2.52736e-72		Bcam	8.77995e-23	0.0228474	0.015	0	2.72644e-18		Sike1	3.20311e-10	0.222947	0.234	0.1	9.94662e-06
Hint1	7.87733e-168	0.341823	0.943	0.753	2.44615e-163		Polr1e	2.0285e-18	0.176618	0.302	0.119	6.29911e-14		Eif3b	1.31347e-10	0.359497	0.775	0.41	4.07871e-06		Tbcb	1.20529e-76	0.38052	0.299	0.171	3.74278e-72		Naca	1.00219e-22	0.169871	0.997	0.984	3.11209e-18		Irs2	3.26989e-10	0.109169	0.101	0.028	1.0154e-05
Rnf149	3.5929e-166	0.317553	0.379	0.127	1.1157e-161		Fbxw7	2.16418e-18	0.206967	0.38	0.164	6.72044e-14		Cad	1.33999e-10	0.200255	0.27	0.077	4.16107e-06		Lrif1	1.38098e-76	0.393857	0.24	0.113	4.28835e-72		Eef2	1.02576e-22	0.191761	0.985	0.943	3.18529e-18		Ablim1	3.3431e-10	0.25775	0.697	0.45	1.03813e-05
Nup98	5.63811e-166	0.345533	0.465	0.182	1.7508e-161		Rpp14	2.19183e-18	0.197948	0.403	0.179	6.80628e-14		Akap1	1.36882e-10	0.058615	0.045	0.003	4.25059e-06		Ctso	1.14029e-75	0.343148	0.188	0.071	3.54094e-71		Rasa1	1.02638e-22	0.229733	0.418	0.229	3.1872e-18		Ap5m1	3.36985e-10	0.170579	0.211	0.084	1.04644e-05
Calr	8.4112e-166	0.333614	0.971	0.791	2.61193e-161		Mrps7	2.21978e-18	0.245636	0.536	0.272	6.8931e-14		Ppat	1.4925e-10	0.280656	0.607	0.256	4.63467e-06		Armc7	2.50776e-75	0.288301	0.134	0.034	7.78734e-71		Uqcc3	1.09581e-22	0.187855	0.438	0.234	3.40282e-18		Dhcr24	3.41122e-10	0.107013	0.06	0.012	1.05929e-05
Dopey2	9.14856e-166	0.500197	0.411	0.161	2.8409e-161		Smim13	2.23089e-18	0.169539	0.234	0.082	6.92759e-14		Creld2	1.53199e-10	0.344579	0.36	0.122	4.75729e-06		Izumo4	2.58832e-75	0.294024	0.145	0.04	8.0375e-71		Usp3	1.38124e-22	0.176083	0.353	0.179	4.28915e-18		Bad	3.62284e-10	0.161555	0.17	0.062	1.125e-05
Utp20	2.21854e-165	0.286573	0.286	0.075	6.88924e-161		Slfn2	2.5889e-18	0.535359	0.834	0.643	8.03932e-14		Pwp2	1.53968e-10	0.284755	0.326	0.108	4.78116e-06		Ctcf	3.07469e-75	0.413494	0.475	0.398	9.54783e-71		Clstn3	1.72701e-22	0.0555243	0.04	0.005	5.3629e-18		Rpl11	3.66293e-10	0.132156	1	1	1.13745e-05
Bcl2l1	2.512e-165	0.359953	0.353	0.114	7.80051e-161		Pdcd11	2.71537e-18	0.220366	0.39	0.175	8.43204e-14		Csnk2a2	1.54805e-10	0.310677	0.685	0.314	4.80717e-06		Trp53inp1	5.67759e-75	0.3599	0.209	0.088	1.76306e-70		Sh3bgrl3	2.01726e-22	0.214893	0.989	0.887	6.26421e-18		Twf2	3.74493e-10	0.238861	0.445	0.242	1.16291e-05
Utp23	4.77207e-165	0.310595	0.388	0.133	1.48187e-160		Smyd5	2.7914e-18	0.211582	0.325	0.135	8.66813e-14		Erap1	1.55788e-10	0.284315	0.629	0.267	4.83769e-06		3830406C13Rik	5.71746e-75	0.365755	0.255	0.127	1.77544e-70		Cd37	2.28876e-22	0.184931	0.793	0.538	7.10727e-18		Nckap1l	3.87082e-10	0.246208	0.303	0.145	1.20201e-05
Rcc1	2.69841e-163	0.262255	0.228	0.046	8.37937e-159		Aimp2	2.89178e-18	0.214583	0.414	0.186	8.97984e-14		Ltv1	1.65807e-10	0.352131	0.539	0.231	5.1488e-06		Tprgl	6.35187e-75	0.410293	0.403	0.295	1.97245e-70		Leprot	2.85056e-22	0.106481	0.203	0.081	8.85185e-18		Cd96	3.96885e-10	0.25688	0.349	0.178	1.23245e-05
Rbm8a	1.8934e-162	0.365634	0.758	0.43	5.87958e-158		Phf5a	2.94709e-18	0.274385	0.708	0.407	9.15161e-14		Nob1	1.65891e-10	0.308302	0.494	0.2	5.15142e-06		Tmem173	7.83003e-75	0.348887	0.242	0.112	2.43146e-70		Gm15947	2.86459e-22	0.0264662	0.017	0.001	8.8954e-18		Rmdn2	3.98988e-10	0.168796	0.151	0.052	1.23898e-05
Tkt	4.52673e-162	0.389521	0.705	0.388	1.40568e-157		Timm13	3.49767e-18	0.29476	0.871	0.592	1.08613e-13		Zap70	1.70986e-10	0.463252	0.921	0.597	5.30964e-06		Smim14	1.01527e-74	0.386062	0.297	0.17	3.15273e-70		Mcub	2.98335e-22	0.0214478	0.017	0.001	9.2642e-18		Gemin2	4.02667e-10	0.154063	0.156	0.055	1.2504e-05
Snrpd2	4.54121e-162	0.371736	0.828	0.528	1.41018e-157		Wdr36	3.92352e-18	0.208091	0.329	0.137	1.21837e-13		Gnl2	1.72791e-10	0.325266	0.663	0.309	5.36566e-06		Lax1	1.25206e-74	0.373977	0.309	0.177	3.88803e-70		Rbpms	3.19957e-22	0.171466	0.186	0.074	9.93564e-18		Wls	4.04702e-10	0.207651	0.193	0.076	1.25672e-05
Pcbp1	4.98108e-162	0.387548	0.824	0.518	1.54677e-157		Snrpd2	4.048e-18	0.289897	0.861	0.625	1.25702e-13		Rsl24d1	1.81255e-10	0.374181	0.73	0.391	5.6285e-06		Runx3	1.48594e-74	0.418115	0.365	0.243	4.61428e-70		Snapc5	3.38574e-22	0.168582	0.387	0.199	1.05137e-17		Irf2bpl	4.24692e-10	0.209116	0.321	0.155	1.3188e-05
Slc5a3	5.44486e-162	0.300171	0.27	0.069	1.69079e-157		Alyref	4.53991e-18	0.298433	0.688	0.392	1.40978e-13		Nus1	1.87988e-10	0.310777	0.607	0.277	5.83758e-06		Ctdsp2	1.82785e-74	0.294205	0.144	0.04	5.67603e-70		Rbm43	3.46032e-22	0.131046	0.166	0.062	1.07453e-17		Sirt7	4.40176e-10	0.269945	0.491	0.288	1.36688e-05
Hk2	5.57703e-162	0.252868	0.171	0.022	1.73183e-157		Gm26917	4.54823e-18	0.330522	0.871	0.624	1.41236e-13		Rps26	1.97283e-10	0.244802	1	0.978	6.12623e-06		Lamtor1	2.13915e-74	0.386117	0.379	0.263	6.64271e-70		Tiam1	3.57661e-22	0.0513145	0.041	0.006	1.11065e-17		D1Ertd622e	4.46298e-10	0.254061	0.271	0.128	1.38589e-05
Timm50	7.7765e-162	0.310704	0.4	0.143	2.41484e-157		Usp31	4.65762e-18	0.169812	0.261	0.097	1.44633e-13		Snrpa1	2.02991e-10	0.346666	0.865	0.473	6.30348e-06		Pglyrp1	3.08243e-74	0.339047	0.192	0.075	9.57186e-70		Ldb1	3.60465e-22	0.204924	0.375	0.196	1.11935e-17		Tcf19	4.52591e-10	0.0674661	0.041	0.006	1.40543e-05
Rps19bp1	1.29561e-159	0.299964	0.437	0.165	4.02326e-155		Phactr2	4.92086e-18	0.181527	0.203	0.068	1.52807e-13		Hspa4	2.1899e-10	0.387453	0.843	0.533	6.80029e-06		Hdhd5	3.49947e-74	0.340753	0.196	0.078	1.08669e-69		Gm17018	3.67058e-22	0.144387	0.215	0.09	1.13982e-17		Serpinb6a	4.67892e-10	0.130713	0.133	0.043	1.45295e-05
Gm47283	1.63265e-159	0.362567	0.633	0.311	5.06986e-155		Utp20	5.49786e-18	0.215942	0.336	0.143	1.70725e-13		Cct5	2.1978e-10	0.36627	0.966	0.701	6.82482e-06		Aak1	5.29695e-74	0.408905	0.367	0.246	1.64486e-69		Smurf2	3.71853e-22	0.148657	0.195	0.08	1.15471e-17		Tiam1	4.76241e-10	0.0834783	0.046	0.007	1.47887e-05
Prps1	3.50139e-159	0.296736	0.336	0.105	1.08729e-154		Prr7	5.71587e-18	0.180639	0.203	0.068	1.77495e-13		Pwp1	2.27884e-10	0.340686	0.551	0.239	7.07648e-06		Cuta	7.48472e-74	0.394735	0.315	0.19	2.32423e-69		Pdha1	4.12585e-22	0.212977	0.456	0.258	1.2812e-17		Msrb1	4.95235e-10	0.162083	0.193	0.074	1.53785e-05
Gpatch4	5.32778e-159	0.333729	0.416	0.155	1.65443e-154		Xpot	6.64981e-18	0.183464	0.373	0.161	2.06496e-13		Mphosph10	2.48251e-10	0.438695	0.809	0.473	7.70894e-06		Marc2	1.31781e-73	0.368861	0.39	0.272	4.0922e-69		Ilk	4.34318e-22	0.147838	0.21	0.088	1.34869e-17		Snx2	4.9785e-10	0.251265	0.385	0.207	1.54598e-05
Smn1	6.11097e-159	0.30184	0.381	0.132	1.89764e-154		Usp36	6.94178e-18	0.186727	0.386	0.17	2.15563e-13		Mydgf	2.57081e-10	0.382808	0.685	0.354	7.98313e-06		Rpl11	1.55505e-73	0.109799	1	1	4.8289e-69		Bnip3l	4.34715e-22	0.193393	0.522	0.292	1.34992e-17		Sumf2	5.04975e-10	0.161015	0.124	0.039	1.5681e-05
Prpf19	1.35214e-158	0.319013	0.446	0.172	4.1988e-154		Nup54	6.9697e-18	0.215394	0.42	0.194	2.1643e-13		Gm14005	2.77178e-10	0.114876	0.146	0.029	8.60721e-06		Gm37387	5.06335e-73	0.308487	0.154	0.047	1.57232e-68		Rac2	4.6584e-22	0.186209	0.991	0.876	1.44657e-17		Amdhd2	5.05642e-10	0.105819	0.128	0.04	1.57017e-05
Ipo4	1.43197e-158	0.253258	0.205	0.038	4.4467e-154		Bop1	7.92036e-18	0.168395	0.369	0.159	2.45951e-13		Sar1a	2.78247e-10	0.373932	0.798	0.441	8.64039e-06		Fam102a	7.07646e-73	0.394243	0.362	0.24	2.19745e-68		Itgb1bp1	5.49692e-22	0.146262	0.32	0.156	1.70696e-17		Dcaf8	5.14649e-10	0.245895	0.39	0.204	1.59814e-05
Mogs	1.48714e-158	0.334091	0.48	0.195	4.61801e-154		Kmt5a	8.39799e-18	0.258341	0.546	0.285	2.60783e-13		Rps17	2.90136e-10	0.28244	1	0.936	9.00959e-06		Chic2	7.35784e-73	0.388858	0.387	0.283	2.28483e-68		Ndufs2	5.6159e-22	0.191148	0.501	0.288	1.74391e-17		Tgfbr2	5.43168e-10	0.232975	0.39	0.203	1.6867e-05
Ifrd1	2.5063e-158	0.325176	0.401	0.145	7.78282e-154		Fkbp1a	1.00182e-17	0.296454	0.803	0.52	3.11095e-13		Nucks1	2.9283e-10	0.376322	0.921	0.592	9.09324e-06		Itch	7.74115e-73	0.41432	0.357	0.243	2.40386e-68		Rpl7a	5.71336e-22	0.161757	1	0.985	1.77417e-17		Smim14	5.53384e-10	0.21941	0.436	0.232	1.71842e-05
Atf4	2.74956e-158	0.361369	0.688	0.362	8.53819e-154		Utp4	1.00548e-17	0.186514	0.342	0.144	3.12232e-13		Umps	3.04957e-10	0.389135	0.573	0.263	9.46984e-06		Tle4	8.67958e-73	0.397915	0.297	0.173	2.69527e-68		Dcps	5.80447e-22	0.162096	0.278	0.132	1.80246e-17		Ndufa8	5.77855e-10	0.270323	0.624	0.432	1.79441e-05
Tuba1b	4.49987e-158	0.36257	0.578	0.271	1.39734e-153		Ctsc	1.07322e-17	0.200987	0.42	0.189	3.33265e-13		Uap1	3.06209e-10	0.271915	0.393	0.141	9.5087e-06		Aph1a	1.19252e-72	0.400853	0.284	0.162	3.70314e-68		Taf6l	6.34338e-22	0.196144	0.422	0.23	1.96981e-17		Zfp120	5.91905e-10	0.203815	0.22	0.092	1.83804e-05
Gramd1b	6.14326e-158	0.468357	0.464	0.201	1.90766e-153		Cluh	1.1268e-17	0.197691	0.356	0.154	3.49906e-13		Zfp566	3.09381e-10	0.144825	0.191	0.046	9.6072e-06		Apobr	3.56942e-72	0.256908	0.119	0.026	1.10841e-67		Man2b1	6.47154e-22	0.197543	0.515	0.3	2.00961e-17		Etfbkmt	6.30195e-10	0.151087	0.124	0.039	1.95695e-05
Sbno1	6.66626e-158	0.364248	0.737	0.417	2.07007e-153		2410002F23Rik	1.2349e-17	0.210914	0.414	0.188	3.83474e-13		Il18bp	3.26096e-10	0.0911356	0.079	0.01	1.01263e-05		Tnik	3.82752e-72	0.379979	0.28	0.153	1.18856e-67		Triobp	6.58513e-22	0.121718	0.201	0.082	2.04488e-17		Ccdc12	6.36036e-10	0.280012	0.674	0.492	1.97508e-05
Trpm6	8.87875e-158	0.33698	0.276	0.074	2.75712e-153		Snrpb	1.30251e-17	0.266194	0.956	0.781	4.04469e-13		Batf	3.32367e-10	0.375945	0.652	0.328	1.0321e-05		Slfn8	6.39478e-72	0.389846	0.263	0.138	1.98577e-67		Ccs	6.91014e-22	0.142227	0.272	0.124	2.14581e-17		Tcrg-V4	6.66082e-10	0.104514	0.073	0.017	2.06838e-05
Rae1	9.97861e-158	0.329941	0.546	0.239	3.09866e-153		Lcp2	1.42376e-17	0.416496	0.725	0.468	4.42122e-13		Prelid3b	3.70292e-10	0.273808	0.528	0.216	1.14987e-05		H2afy	6.56853e-72	0.336414	0.651	0.656	2.03972e-67		Il16	7.78961e-22	0.143716	0.467	0.245	2.41891e-17		Hp1bp3	7.35275e-10	0.236936	0.518	0.297	2.28325e-05
Rrp1	6.04766e-157	0.355685	0.753	0.423	1.87798e-152		BC005561	1.49296e-17	0.221696	0.444	0.21	4.63609e-13		Hnrnpu	3.8196e-10	0.3485	0.966	0.821	1.1861e-05		Xrn1	6.8005e-72	0.387521	0.253	0.13	2.11176e-67		Arhgap4	8.61275e-22	0.159223	0.27	0.124	2.67452e-17		Leprot	7.69156e-10	0.182121	0.211	0.087	2.38846e-05
Arih2	7.42551e-157	0.287928	0.345	0.11	2.30584e-152		Polr2f	1.81252e-17	0.327844	0.719	0.458	5.62842e-13		Rrp8	4.06873e-10	0.264697	0.404	0.149	1.26346e-05		Rnf167	7.97319e-72	0.397169	0.313	0.191	2.47591e-67		Dhrs1	9.05865e-22	0.0952855	0.106	0.032	2.81298e-17		Helz	7.71051e-10	0.23722	0.339	0.169	2.39435e-05
Rabggtb	2.03206e-156	0.303835	0.358	0.121	6.31015e-152		Gm12534	1.98522e-17	0.0172931	0.01	0	6.16471e-13		Pdcd11	4.15859e-10	0.231136	0.472	0.179	1.29137e-05		Plac8	1.03345e-71	0.433198	0.311	0.17	3.20917e-67		Rala	9.23286e-22	0.212279	0.327	0.169	2.86708e-17		Cdc42se1	8.15084e-10	0.311515	0.486	0.309	2.53108e-05
Chd4	3.47966e-156	0.393878	0.795	0.497	1.08054e-151		Olfr56	2.08859e-17	0.0530034	0.047	0.006	6.48569e-13		Rnf19a	4.18107e-10	0.250616	0.393	0.142	1.29835e-05		Btbd11	1.5155e-71	0.309755	0.152	0.048	4.70608e-67		6330403K07Rik	9.50927e-22	0.0857084	0.117	0.036	2.95291e-17		Glud1	8.29887e-10	0.261336	0.408	0.229	2.57705e-05
Wdr55	6.2284e-156	0.284837	0.311	0.092	1.9341e-151		Fam207a	2.30631e-17	0.235984	0.403	0.187	7.1618e-13		Cyb5b	4.19254e-10	0.327572	0.652	0.318	1.30191e-05		Ahnak	1.93815e-71	0.426857	0.341	0.21	6.01853e-67		She	9.82496e-22	0.055949	0.04	0.006	3.05094e-17		Qpct	8.62029e-10	0.197312	0.284	0.131	2.67686e-05
Psmd11	3.0517e-155	0.36015	0.682	0.361	9.47644e-151		Cebpz	2.58237e-17	0.241866	0.678	0.39	8.01902e-13		Heg1	4.37921e-10	0.245722	0.326	0.107	1.35988e-05		Sla2	2.92981e-71	0.312987	0.176	0.065	9.09793e-67		Wdyhv1	1.00364e-21	0.122202	0.175	0.068	3.1166e-17		Tlk1	8.94247e-10	0.244373	0.344	0.177	2.77691e-05
Rps8	7.22593e-155	0.169657	1	0.999	2.24387e-150		Pgk1	2.61501e-17	0.283176	0.739	0.473	8.12039e-13		Nle1	4.44478e-10	0.216671	0.337	0.112	1.38024e-05		Rpl38	3.27424e-71	0.179183	0.977	0.992	1.01675e-66		Grap2	1.1048e-21	0.16207	0.306	0.146	3.43073e-17		Rb1cc1	8.98993e-10	0.264554	0.463	0.268	2.79164e-05
Usp10	8.9854e-155	0.282207	0.318	0.097	2.79024e-150		Mthfd2	2.76123e-17	0.23314	0.485	0.239	8.57444e-13		Usp10	4.49362e-10	0.25676	0.449	0.172	1.3954e-05		Hvcn1	7.1283e-71	0.305039	0.159	0.053	2.21355e-66		Klf7	1.14266e-21	0.118104	0.126	0.042	3.54829e-17		March2	9.80202e-10	0.240501	0.367	0.192	3.04382e-05
Shmt2	1.34898e-154	0.268188	0.261	0.066	4.18899e-150		Lrrc59	2.84855e-17	0.269408	0.505	0.263	8.84561e-13		Nol11	4.71269e-10	0.328138	0.685	0.313	1.46343e-05		Rpl37	1.69399e-70	0.158098	0.987	0.994	5.26036e-66		Tmem192	1.36591e-21	0.135492	0.247	0.11	4.24155e-17		Isoc2b	9.90893e-10	0.168551	0.128	0.042	3.07702e-05
Litaf	1.60509e-154	0.258427	0.177	0.026	4.98429e-150		Lsg1	2.92521e-17	0.227315	0.519	0.263	9.08364e-13		Relb	4.7795e-10	0.329294	0.697	0.337	1.48418e-05		Fxyd5	1.99495e-70	0.28778	0.7	0.666	6.1949e-66		Zc3hav1	1.38464e-21	0.18198	0.57	0.339	4.29972e-17		Tanc1	9.93516e-10	0.118342	0.092	0.025	3.08516e-05
Luc7l	2.05385e-154	0.320626	0.486	0.204	6.37781e-150		Ppm1g	3.02866e-17	0.244832	0.732	0.416	9.40491e-13		Mak16	4.8316e-10	0.331663	0.787	0.398	1.50036e-05		Gdi2	2.05377e-70	0.366639	0.548	0.504	6.37758e-66		Tcp11l2	1.5386e-21	0.155034	0.237	0.104	4.7778e-17		Mpnd	1.01476e-09	0.205856	0.193	0.077	3.15113e-05
Ptpn22	3.58066e-154	0.455347	0.782	0.537	1.1119e-149		Ilf3	3.09833e-17	0.189603	0.471	0.224	9.62123e-13		Magoh	4.85193e-10	0.36163	0.921	0.629	1.50667e-05		Zfp945	3.09383e-70	0.297335	0.153	0.048	9.60727e-66		Hes1	1.5788e-21	0.052168	0.022	0.001	4.90266e-17		Il27ra	1.03006e-09	0.265952	0.514	0.308	3.19864e-05
Malt1	2.29842e-153	0.401599	0.486	0.21	7.1373e-149		Rps15	3.12539e-17	0.15714	1	0.996	9.70528e-13		Psmd11	5.08752e-10	0.391883	0.82	0.47	1.57983e-05		Mindy2	9.05552e-70	0.360674	0.227	0.108	2.81201e-65		Prkag1	1.68323e-21	0.115036	0.235	0.101	5.22694e-17		Flt3l	1.05778e-09	0.246715	0.229	0.098	3.28472e-05
Usp31	2.78254e-153	0.240874	0.213	0.043	8.64062e-149		Wdr3	3.26468e-17	0.23234	0.444	0.214	1.01378e-12		Ctla4	5.12237e-10	0.402472	0.101	0.016	1.59065e-05		Cd72	9.19729e-70	0.342939	0.185	0.073	2.85603e-65		Gpi1	1.71296e-21	0.215455	0.717	0.509	5.31926e-17		Pon3	1.0946e-09	0.0395148	0.023	0.002	3.39905e-05
Heatr3	3.25049e-153	0.262567	0.242	0.057	1.00937e-148		Ampd2	3.66343e-17	0.139055	0.207	0.071	1.13761e-12		Abcf1	5.18383e-10	0.399502	0.787	0.454	1.60973e-05		Acaa2	9.2324e-70	0.327813	0.222	0.104	2.86694e-65		Galnt12	1.7252e-21	0.134646	0.272	0.124	5.35725e-17		Slc37a3	1.12637e-09	0.178473	0.174	0.067	3.49772e-05
Trib1	5.001e-153	0.237362	0.146	0.014	1.55296e-148		Zdhhc5	3.71373e-17	0.174033	0.292	0.116	1.15322e-12		Pinx1	5.49833e-10	0.234364	0.416	0.155	1.7074e-05		Nek7	1.63572e-69	0.382923	0.278	0.158	5.07941e-65		Pon2	2.10288e-21	0.162974	0.301	0.146	6.53006e-17		1300002E11Rik	1.14672e-09	0.175305	0.234	0.1	3.56092e-05
Dot1l	9.29363e-153	0.299963	0.322	0.101	2.88595e-148		Rangap1	3.98905e-17	0.266711	0.553	0.289	1.23872e-12		Eif3g	5.52031e-10	0.367221	0.876	0.582	1.71422e-05		Clk1	2.26594e-69	0.41418	0.426	0.333	7.03641e-65		Lsm10	2.34854e-21	0.13205	0.212	0.09	7.29292e-17		Dpp4	1.20887e-09	0.174319	0.248	0.11	3.75391e-05
Pou2f2	2.53573e-152	0.444919	0.384	0.146	7.8742e-148		Csrnp1	4.11592e-17	0.297365	0.424	0.209	1.27812e-12		Pes1	5.69539e-10	0.264745	0.461	0.18	1.76859e-05		Tgfbr2	2.61639e-69	0.383801	0.264	0.144	8.12467e-65		Lamtor1	2.44006e-21	0.196588	0.527	0.309	7.57711e-17		Stim1	1.20939e-09	0.244209	0.349	0.181	3.75552e-05
Hnrnpf	3.23393e-152	0.274126	0.984	0.904	1.00423e-147		Imp4	4.25213e-17	0.277236	0.644	0.37	1.32041e-12		Cinp	5.70685e-10	0.289548	0.404	0.153	1.77215e-05		Kansl1	3.88871e-69	0.399403	0.351	0.242	1.20756e-64		Pik3r1	2.62457e-21	0.1678	0.579	0.332	8.15006e-17		Cers4	1.24314e-09	0.323695	0.28	0.136	3.86032e-05
Klhdc4	9.79529e-152	0.276538	0.311	0.095	3.04173e-147		Ubfd1	4.27152e-17	0.22724	0.42	0.201	1.32644e-12		Gar1	5.75211e-10	0.404621	0.697	0.357	1.7862e-05		Dusp6	4.29428e-69	0.343571	0.174	0.066	1.3335e-64		Hadhb	2.7841e-21	0.168613	0.484	0.269	8.64545e-17		Arl11	1.30494e-09	0.0769095	0.05	0.009	4.05222e-05
Memo1	1.89265e-151	0.271871	0.285	0.081	5.87723e-147		Dnaja2	4.30173e-17	0.265932	0.919	0.661	1.33582e-12		Rps19bp1	6.0081e-10	0.320683	0.584	0.257	1.8657e-05		Rcsd1	5.1883e-69	0.373876	0.338	0.214	1.61112e-64		Qars	3.11009e-21	0.151764	0.273	0.131	9.65775e-17		Ccdc107	1.31894e-09	0.257205	0.376	0.204	4.09572e-05
Pisd	2.02999e-151	0.23895	0.216	0.044	6.30374e-147		Tbl1x	4.4382e-17	0.245558	0.583	0.311	1.37819e-12		Lrrc59	6.05547e-10	0.326981	0.596	0.267	1.8804e-05		Ccdc82	5.58446e-69	0.304046	0.175	0.065	1.73414e-64		Arl5c	3.4227e-21	0.0955578	0.106	0.032	1.06285e-16		Gpsm3	1.39413e-09	0.245367	0.702	0.446	4.32918e-05
Dennd5a	3.72972e-151	0.288628	0.252	0.062	1.15819e-146		Tmem33	4.49575e-17	0.235751	0.481	0.238	1.39606e-12		Rnf19b	6.18321e-10	0.352004	0.528	0.219	1.92007e-05		Dnajc3	1.12711e-68	0.300894	0.619	0.558	3.50002e-64		Adcy7	3.42704e-21	0.129808	0.544	0.292	1.0642e-16		2410089E03Rik	1.41344e-09	0.169172	0.101	0.029	4.38914e-05
Qtrt2	5.52166e-151	0.236761	0.201	0.038	1.71464e-146		Isg20	4.93182e-17	0.186857	0.2	0.068	1.53148e-12		Rae1	6.35331e-10	0.387058	0.685	0.343	1.97289e-05		AU020206	1.20712e-68	0.394798	0.333	0.214	3.74846e-64		Pfkp	3.47419e-21	0.212552	0.467	0.274	1.07884e-16		Smdt1	1.43094e-09	0.306455	0.693	0.508	4.4435e-05
Chst11	7.62807e-151	0.216114	0.16	0.02	2.36874e-146		Psat1	4.97403e-17	0.174112	0.22	0.079	1.54458e-12		Tnfrsf9	6.41777e-10	0.544917	0.652	0.332	1.99291e-05		Cyfip2	1.48771e-68	0.375506	0.334	0.21	4.6198e-64		Flt3l	3.96823e-21	0.149687	0.217	0.093	1.23225e-16		Gabpb2	1.47642e-09	0.249529	0.353	0.184	4.58473e-05
Tnfrsf4	3.18815e-150	0.318063	0.154	0.018	9.90016e-146		Polr3d	5.30435e-17	0.215465	0.393	0.182	1.64716e-12		Cluh	6.54129e-10	0.264586	0.416	0.158	2.03127e-05		Fibp	3.16731e-68	0.348771	0.24	0.121	9.83546e-64		Dap3	4.00017e-21	0.158845	0.344	0.175	1.24217e-16		Atraid	1.552e-09	0.207951	0.289	0.136	4.81941e-05
Tet2	7.56366e-150	0.39606	0.337	0.116	2.34874e-145		Mrps18b	5.51388e-17	0.200118	0.434	0.204	1.71223e-12		Gnaq	7.03968e-10	0.140415	0.169	0.038	2.18603e-05		Itgb1	5.4268e-68	0.420318	0.439	0.357	1.68518e-63		Tmem50b	4.6465e-21	0.0704308	0.061	0.013	1.44288e-16		Tax1bp1	1.56861e-09	0.309617	0.739	0.562	4.871e-05
Phf5a	1.38852e-149	0.332667	0.621	0.306	4.31177e-145		Ubap2	5.78336e-17	0.163885	0.376	0.164	1.79591e-12		Dnaja2	7.05822e-10	0.38966	0.966	0.666	2.19179e-05		Cbl	9.39165e-68	0.419333	0.381	0.279	2.91639e-63		Maz	4.69982e-21	0.182874	0.389	0.211	1.45943e-16		Fryl	1.61165e-09	0.290306	0.413	0.24	5.00465e-05
Ubl3	1.4325e-149	0.381439	0.523	0.24	4.44833e-145		Glrx3	5.83145e-17	0.259226	0.8	0.489	1.81084e-12		Nat10	7.13527e-10	0.234265	0.371	0.131	2.21571e-05		Smc6	1.59732e-67	0.412084	0.366	0.257	4.96016e-63		Slc12a7	4.84871e-21	0.120468	0.154	0.057	1.50567e-16		Gnb2	1.66042e-09	0.30784	0.674	0.473	5.1561e-05
Utp6	2.61348e-149	0.297054	0.35	0.119	8.11563e-145		Slc3a2	6.95703e-17	0.279775	0.831	0.542	2.16037e-12		Fbl	7.13677e-10	0.390669	0.933	0.59	2.21618e-05		Acyp1	1.73107e-67	0.368448	0.287	0.169	5.37549e-63		Decr1	6.02623e-21	0.100859	0.106	0.032	1.87132e-16		Gpr108	1.6634e-09	0.171246	0.197	0.08	5.16535e-05
Nudt5	3.06821e-149	0.289598	0.418	0.16	9.52771e-145		Cnih4	7.76231e-17	0.262213	0.505	0.264	2.41043e-12		Csrnp1	7.15326e-10	0.311923	0.494	0.213	2.2213e-05		Mgst2	1.75258e-67	0.324618	0.194	0.08	5.44228e-63		Phf14	6.42753e-21	0.170341	0.419	0.223	1.99594e-16		Txnip	1.73293e-09	0.221071	0.642	0.389	5.38127e-05
Purb	1.37303e-148	0.362466	0.851	0.563	4.26366e-144		H13	8.19072e-17	0.25924	0.695	0.39	2.54346e-12		Pim1	7.49354e-10	0.447478	0.865	0.519	2.32697e-05		Irf2bpl	2.02791e-67	0.357294	0.214	0.099	6.29728e-63		Parp9	6.70348e-21	0.161389	0.264	0.124	2.08163e-16		Ret	1.76844e-09	0.0373301	0.018	0.001	5.49155e-05
Rps2	2.13476e-147	0.20495	1	0.997	6.62907e-143		Nasp	8.41286e-17	0.248479	0.617	0.343	2.61244e-12		Utp6	7.68167e-10	0.2537	0.494	0.197	2.38539e-05		Dazap2	2.83097e-67	0.394631	0.418	0.326	8.79102e-63		Rora	6.88274e-21	0.249713	0.596	0.383	2.1373e-16		Slpi	1.83025e-09	0.0322732	0.014	0.001	5.68348e-05
Ilf3	2.87044e-147	0.304367	0.391	0.146	8.91358e-143		Fam60a	8.82462e-17	0.220578	0.485	0.235	2.74031e-12		Cldnd1	7.84033e-10	0.255026	0.427	0.162	2.43466e-05		Tmem30a	2.94944e-67	0.393588	0.322	0.206	9.1589e-63		Rnh1	7.22786e-21	0.192035	0.401	0.222	2.24447e-16		Gm15947	1.83894e-09	0.0252403	0.018	0.001	5.71046e-05
Mafg	3.35262e-147	0.290724	0.357	0.124	1.04109e-142		Hdgf	9.09226e-17	0.297966	0.776	0.494	2.82342e-12		Ubash3b	8.39655e-10	0.399208	0.416	0.169	2.60738e-05		Prkd2	2.97794e-67	0.290044	0.157	0.054	9.24739e-63		Ccr2	7.47026e-21	0.265683	0.627	0.429	2.31974e-16		Plxnd1	1.85922e-09	0.144566	0.073	0.018	5.77342e-05
Zap70	3.50168e-147	0.371375	0.797	0.495	1.08738e-142		Cflar	9.16712e-17	0.288089	0.698	0.414	2.84667e-12		Ctps	8.48291e-10	0.335168	0.483	0.208	2.6342e-05		Dennd1c	4.08101e-67	0.31338	0.189	0.078	1.26728e-62		Marc2	7.96937e-21	0.192151	0.541	0.32	2.47473e-16		Myadm	1.85992e-09	0.0399839	0.014	0.001	5.77561e-05
Sod2	1.18188e-146	0.370862	0.692	0.385	3.67008e-142		S100a5	9.18475e-17	0.075774	0.017	0.001	2.85214e-12		Selenoi	9.33739e-10	0.283326	0.449	0.176	2.89954e-05		Gbp4	4.88733e-67	0.304889	0.349	0.215	1.51766e-62		Map4k2	8.35932e-21	0.143349	0.25	0.114	2.59582e-16		Scd2	1.87729e-09	0.166726	0.161	0.059	5.82956e-05
Ahr	1.26037e-146	0.365823	0.205	0.043	3.91383e-142		Eef1akmt4	9.60328e-17	0.135656	0.207	0.071	2.98211e-12		Tdrkh	9.55627e-10	0.121007	0.09	0.013	2.96751e-05		Tmbim6	6.60882e-67	0.319579	0.624	0.614	2.05224e-62		Trbc2	8.512e-21	0.205167	0.997	0.962	2.64323e-16		Leprotl1	1.94914e-09	0.268127	0.729	0.526	6.05267e-05
Pwp2	1.60763e-146	0.235463	0.223	0.05	4.99218e-142		Nfkbib	9.87843e-17	0.238344	0.61	0.325	3.06755e-12		Txn2	1.05119e-09	0.389458	0.82	0.475	3.26425e-05		Birc2	8.38799e-67	0.367814	0.262	0.145	2.60472e-62		Cfap74	8.53692e-21	0.0586522	0.043	0.007	2.65097e-16		Znrf1	1.98086e-09	0.234147	0.385	0.209	6.15118e-05
Sco2	2.1338e-146	0.292133	0.323	0.106	6.6261e-142		S100a6	1.00466e-16	0.357033	0.41	0.203	3.11977e-12		P2ry1	1.09022e-09	0.0370771	0.022	0.001	3.38546e-05		Ddit3	9.76926e-67	0.332576	0.19	0.079	3.03365e-62		Fis1	8.72658e-21	0.198275	0.679	0.458	2.70986e-16		Klf7	2.05291e-09	0.17601	0.133	0.045	6.37489e-05
2410002F23Rik	3.39207e-146	0.288529	0.343	0.116	1.05334e-141		Sfpq	1.01989e-16	0.295271	0.919	0.663	3.16707e-12		Fbxw11	1.1007e-09	0.203325	0.247	0.072	3.41799e-05		Lims1	1.3689e-66	0.376781	0.275	0.156	4.25084e-62		Mfge8	9.35494e-21	0.0581222	0.052	0.01	2.90499e-16		Selenof	2.09724e-09	0.287511	0.729	0.602	6.51255e-05
Rrad	9.65515e-146	0.794482	0.452	0.208	2.99821e-141		Gfer	1.11591e-16	0.191545	0.417	0.194	3.46523e-12		Tmcc3	1.11238e-09	0.0366896	0.022	0.001	3.45428e-05		Ttc7	1.70086e-66	0.290234	0.16	0.056	5.2817e-62		Acot13	9.74831e-21	0.140183	0.24	0.107	3.02714e-16		Dusp1	2.19901e-09	0.264267	0.339	0.178	6.82859e-05
Ahctf1	5.05864e-145	0.310147	0.414	0.162	1.57086e-140		Bdp1	1.14469e-16	0.23208	0.559	0.287	3.55462e-12		S100a5	1.13499e-09	0.0341229	0.022	0.001	3.52447e-05		Pik3ip1	1.8537e-66	0.292928	0.158	0.055	5.75629e-62		Mllt3	9.85529e-21	0.169553	0.326	0.163	3.06036e-16		Ctps2	2.21381e-09	0.183704	0.248	0.111	6.87453e-05
Wdr46	9.7265e-145	0.24916	0.257	0.068	3.02037e-140		Cep83	1.23965e-16	0.181531	0.383	0.174	3.8495e-12		Slc22a21	1.14415e-09	0.0277887	0.022	0.001	3.55294e-05		Mrpl58	2.66622e-66	0.381096	0.298	0.185	8.27941e-62		Atp2a3	1.05188e-20	0.120969	0.206	0.087	3.2664e-16		Arpc1b	2.21548e-09	0.198909	0.959	0.883	6.87974e-05
Mrpl50	7.28445e-144	0.277732	0.388	0.144	2.26204e-139		Nrgn	1.29325e-16	0.116999	0.051	0.007	4.01591e-12		Ifngr2	1.21764e-09	0.10718	0.09	0.013	3.78114e-05		Fli1	5.09853e-66	0.377305	0.315	0.195	1.58325e-61		Hmgb2	1.10522e-20	0.31324	0.8	0.566	3.43204e-16		Ppt2	2.22267e-09	0.177017	0.174	0.067	6.90205e-05
Rif1	9.33051e-144	0.345441	0.611	0.307	2.8974e-139		Bspry	1.30453e-16	0.152569	0.159	0.048	4.05096e-12		Slc41a1	1.22845e-09	0.315671	0.539	0.242	3.81471e-05		Pbrm1	6.10973e-66	0.414199	0.427	0.336	1.89726e-61		Pstpip1	1.48562e-20	0.132735	0.382	0.196	4.61331e-16		Paxx	2.22653e-09	0.220407	0.252	0.115	6.91403e-05
Eny2	3.74607e-143	0.35108	0.655	0.35	1.16327e-138		Tcerg1	1.306e-16	0.243038	0.569	0.306	4.05552e-12		Mettl1	1.26334e-09	0.286757	0.449	0.182	3.92304e-05		Pink1	6.73536e-66	0.306469	0.166	0.062	2.09153e-61		Arrdc1	1.66167e-20	0.119044	0.167	0.065	5.15997e-16		Ppp2r5c	2.35654e-09	0.255376	0.404	0.225	7.31775e-05
Prkar2a	1.2922e-142	0.263391	0.275	0.078	4.01266e-138		Ddx56	1.31873e-16	0.182191	0.349	0.151	4.09505e-12		Ak6	1.28283e-09	0.259409	0.528	0.221	3.98357e-05		Dcaf8	1.09638e-65	0.365252	0.263	0.147	3.4046e-61		Rassf2	1.86994e-20	0.121145	0.264	0.121	5.80672e-16		Pik3cg	2.36264e-09	0.137697	0.156	0.056	7.33671e-05
Ddx5	1.39826e-142	0.232922	0.997	0.964	4.34202e-138		Ydjc	1.40813e-16	0.136885	0.193	0.065	4.37267e-12		Hnrnpf	1.29099e-09	0.274603	1	0.931	4.00892e-05		Capns1	1.3408e-65	0.371598	0.395	0.295	4.16358e-61		Gtf3a	1.92316e-20	0.184395	0.33	0.175	5.97198e-16		Tmem14c	2.3815e-09	0.29509	0.569	0.384	7.39529e-05
Fkbp1a	2.2326e-142	0.349117	0.733	0.418	6.93289e-138		Cct4	1.45509e-16	0.277238	0.919	0.653	4.5185e-12		Erf	1.35177e-09	0.214746	0.225	0.064	4.19766e-05		Calhm2	1.38515e-65	0.260474	0.118	0.03	4.30129e-61		Faap20	1.97878e-20	0.132224	0.263	0.122	6.14471e-16		Rcor3	2.65673e-09	0.160538	0.128	0.043	8.24995e-05
Crabp2	3.29201e-142	0.385929	0.114	0.006	1.02227e-137		Gsto1	1.47271e-16	0.171048	0.342	0.147	4.57321e-12		Nol8	1.36931e-09	0.310808	0.573	0.262	4.25211e-05		H2-T23	1.45553e-65	0.306744	0.697	0.69	4.51986e-61		Mitd1	2.19365e-20	0.153862	0.346	0.178	6.81193e-16		Elmsan1	2.72635e-09	0.155187	0.147	0.053	8.46614e-05
Sh3gl3	4.75902e-142	0.263729	0.214	0.048	1.47782e-137		Litaf	1.49052e-16	0.164179	0.21	0.075	4.62852e-12		Trib1	1.44876e-09	0.248115	0.213	0.059	4.49883e-05		Rin3	1.51477e-65	0.309172	0.175	0.069	4.7038e-61		Fam102b	2.26805e-20	0.0980599	0.091	0.026	7.04297e-16		Coro2a	2.75347e-09	0.271601	0.344	0.18	8.55036e-05
Hdlbp	9.64382e-142	0.325788	0.5	0.224	2.99469e-137		Rae1	1.79505e-16	0.26273	0.607	0.338	5.57417e-12		Azin1	1.51191e-09	0.283228	0.562	0.243	4.69494e-05		Susd3	3.54995e-65	0.241496	0.11	0.024	1.10237e-60		Galk2	2.72176e-20	0.106525	0.181	0.073	8.45189e-16		Pfkp	2.87912e-09	0.263158	0.459	0.283	8.94053e-05
Mrfap1	2.45586e-141	0.340499	0.804	0.499	7.62618e-137		Pes1	1.83755e-16	0.217553	0.38	0.177	5.70613e-12		Kcnc1	1.55848e-09	0.0427095	0.034	0.002	4.83953e-05		Sesn1	4.44806e-65	0.383089	0.267	0.151	1.38126e-60		Atpif1	3.63116e-20	0.139857	0.233	0.106	1.12758e-15		Kcnn4	3.10395e-09	0.21813	0.284	0.139	9.63871e-05
1810022K09Rik	6.11423e-141	0.308561	0.558	0.26	1.89865e-136		Cdk5r1	1.84468e-16	0.143776	0.122	0.032	5.7283e-12		Cry1	1.58551e-09	0.173036	0.326	0.108	4.9235e-05		AC147041.1	5.74482e-65	0.208197	0.085	0.011	1.78394e-60		Tmem173	3.67387e-20	0.146505	0.336	0.169	1.14085e-15		Marveld1	3.13673e-09	0.149392	0.124	0.041	9.7405e-05
Rnf19a	6.63933e-141	0.272265	0.27	0.077	2.06171e-136		Smyd2	2.17165e-16	0.189004	0.298	0.124	6.74361e-12		Uqcrfs1	1.67245e-09	0.34292	0.82	0.478	5.19346e-05		Kif21b	7.17465e-65	0.332614	0.206	0.094	2.22794e-60		Padi1	3.67475e-20	0.0310352	0.02	0.001	1.14112e-15		Pigyl	3.15437e-09	0.171974	0.225	0.097	9.79525e-05
Pes1	4.42807e-140	0.266082	0.324	0.108	1.37505e-135		Ksr1	2.37709e-16	0.163111	0.302	0.125	7.38159e-12		Gm47566	1.72769e-09	0.0415019	0.045	0.004	5.36499e-05		Gbp9	7.91295e-65	0.343193	0.208	0.096	2.45721e-60		Slc44a2	3.83199e-20	0.175572	0.333	0.172	1.18995e-15		Pdlim2	3.19627e-09	0.205763	0.321	0.161	9.92536e-05
Larp1b	6.10263e-140	0.272426	0.257	0.071	1.89505e-135		Ptms	2.42002e-16	0.110488	0.115	0.029	7.51488e-12		Lsg1	1.73772e-09	0.275503	0.596	0.268	5.39615e-05		Lppos	8.77316e-65	0.268643	0.138	0.042	2.72433e-60		Rps25	4.77447e-20	0.143904	0.997	0.988	1.48262e-15		Ang	3.25798e-09	0.056387	0.041	0.007	0.00010117
Serp1	7.35694e-140	0.343584	0.62	0.321	2.28455e-135		Tkt	2.77045e-16	0.286972	0.797	0.489	8.60308e-12		Tigar	1.78388e-09	0.117973	0.146	0.031	5.53949e-05		Nmb	8.89742e-65	0.273214	0.138	0.043	2.76292e-60		Selenow	4.94437e-20	0.224261	0.816	0.643	1.53538e-15		Ascc1	3.35984e-09	0.151654	0.197	0.08	0.000104333
Rbm28	9.50914e-140	0.29402	0.495	0.215	2.95287e-135		Klhdc4	2.78907e-16	0.18085	0.366	0.164	8.66091e-12		Hnrnph2	1.82568e-09	0.270634	0.618	0.278	5.66928e-05		Aqp9	1.23029e-64	0.244445	0.112	0.026	3.8204e-60		Cep97	5.83597e-20	0.10356	0.141	0.051	1.81224e-15		Zfand2b	3.59457e-09	0.157839	0.206	0.086	0.000111622
Nle1	4.78524e-139	0.247548	0.225	0.055	1.48596e-134		Mettl2	3.04504e-16	0.158949	0.285	0.116	9.45575e-12		Pprc1	1.88579e-09	0.210346	0.382	0.139	5.85595e-05		Eif3f	1.2424e-64	0.251087	0.796	0.832	3.85803e-60		Lipa	6.46156e-20	0.110159	0.161	0.062	2.00651e-15		Top2b	3.74089e-09	0.2688	0.528	0.327	0.000116166
Rnf4	1.12471e-138	0.296031	0.511	0.23	3.49257e-134		Taf1d	3.0548e-16	0.301326	0.661	0.397	9.48608e-12		Ube2q2	1.89546e-09	0.34727	0.573	0.265	5.88596e-05		Ifit1bl1	2.58937e-64	0.25018	0.108	0.024	8.04076e-60		Utrn	6.68868e-20	0.231693	0.627	0.422	2.07704e-15		Acat2	3.82574e-09	0.110904	0.11	0.034	0.000118801
Caprin1	1.12532e-138	0.327438	0.654	0.344	3.49447e-134		Ndufab1	3.11083e-16	0.29412	0.824	0.552	9.66007e-12		Chd4	1.92497e-09	0.335922	0.899	0.598	5.9776e-05		Fkbp3	7.47984e-64	0.32133	0.625	0.611	2.32271e-59		Sp100	6.80919e-20	0.124712	0.697	0.413	2.11446e-15		Ccr4	4.08311e-09	0.181509	0.142	0.051	0.000126793
Cd320	1.52789e-138	0.239893	0.228	0.056	4.74456e-134		Cmss1	3.21055e-16	0.154537	0.278	0.112	9.96971e-12		Tuft1	2.0532e-09	0.0591729	0.056	0.006	6.3758e-05		Hist3h2a	7.72799e-64	0.234108	0.098	0.018	2.39977e-59		Stmn1	7.32955e-20	0.21921	0.074	0.019	2.27605e-15		Pccb	4.12926e-09	0.091412	0.073	0.018	0.000128226
Pfdn6	2.26335e-137	0.320799	0.643	0.336	7.02839e-133		Sept11	3.99107e-16	0.302587	0.59	0.345	1.23935e-11		Prmt1	2.38035e-09	0.358142	0.865	0.531	7.3917e-05		Numa1	9.45427e-64	0.384091	0.294	0.184	2.93584e-59		Dgkz	7.89601e-20	0.183079	0.413	0.232	2.45195e-15		Galnt1	4.80528e-09	0.274846	0.408	0.237	0.000149218
Csnk2a2	3.62817e-137	0.302503	0.494	0.223	1.12666e-132		Samsn1	4.01202e-16	0.266303	0.525	0.275	1.24585e-11		Dclk1	2.391e-09	0.0447223	0.011	0	7.42476e-05		Apol7e	1.05715e-63	0.202943	0.087	0.013	3.28277e-59		Igbp1	8.62182e-20	0.170852	0.43	0.243	2.67733e-15		Mocs2	4.83977e-09	0.201183	0.216	0.095	0.000150289
Ythdf2	3.84254e-137	0.304051	0.454	0.194	1.19322e-132		Sh2b3	4.09957e-16	0.172151	0.312	0.131	1.27304e-11		Sept5	2.391e-09	0.0214676	0.011	0	7.42476e-05		Bin1	1.85686e-63	0.322459	0.256	0.138	5.76609e-59		Rmnd5b	8.65909e-20	0.120135	0.175	0.071	2.68891e-15		Ntrk3	4.88397e-09	0.195641	0.147	0.054	0.000151662
Hirip3	5.41626e-137	0.271978	0.279	0.084	1.68191e-132		Rnf4	4.14437e-16	0.236474	0.593	0.32	1.28695e-11		Rhbdf2	2.39781e-09	0.1503	0.146	0.032	7.44591e-05		Nlrc3	2.86061e-63	0.282429	0.161	0.059	8.88305e-59		Ptpn7	8.67518e-20	0.176054	0.556	0.339	2.6939e-15		Tuba1a	5.0595e-09	0.212828	0.307	0.153	0.000157113
Mapkapk3	9.12658e-137	0.290549	0.351	0.127	2.83408e-132		Rpl5	4.40373e-16	0.135245	1	0.999	1.36749e-11		Gm48903	2.40912e-09	0.0177829	0.011	0	7.48105e-05		Plgrkt	4.82789e-63	0.352115	0.439	0.344	1.4992e-58		Ccng1	8.98898e-20	0.157266	0.298	0.148	2.79135e-15		Bin3	5.21596e-09	0.182842	0.275	0.132	0.000161971
Usmg5	2.93845e-136	0.325453	0.644	0.339	9.12477e-132		Myb	4.5621e-16	0.145303	0.081	0.017	1.41667e-11		Gm16701	2.40912e-09	0.0173141	0.011	0	7.48105e-05		Parp14	7.39408e-63	0.366491	0.312	0.192	2.29608e-58		Psmb1	9.00246e-20	0.190254	0.911	0.798	2.79553e-15		Rps7	5.31252e-09	0.125686	1	1	0.00016497
Pole4	1.40236e-135	0.332019	0.661	0.355	4.35475e-131		Ino80	4.60537e-16	0.171102	0.414	0.192	1.43011e-11		Mapk10	2.40912e-09	0.0167087	0.011	0	7.48105e-05		Top2b	7.70604e-63	0.384981	0.38	0.279	2.39296e-58		Fbxl8	9.65061e-20	0.0977074	0.112	0.037	2.9968e-15		Vamp5	5.49629e-09	0.208706	0.225	0.1	0.000170676
Foxn2	2.57571e-135	0.295867	0.356	0.133	7.99834e-131		Uchl3	4.62011e-16	0.244533	0.529	0.277	1.43468e-11		Cfap58	2.40912e-09	0.0163405	0.011	0	7.48105e-05		Ndufb3	9.59664e-63	0.349608	0.452	0.369	2.98005e-58		Ndufv3	9.89506e-20	0.172697	0.541	0.321	3.07271e-15		BC147527	5.94425e-09	0.176437	0.193	0.079	0.000184587
Pcna	4.30032e-135	0.280075	0.431	0.176	1.33538e-130		Farsa	4.85815e-16	0.229086	0.495	0.255	1.5086e-11		4933432I09Rik	2.40912e-09	0.016326	0.011	0	7.48105e-05		Mirt1	1.37327e-62	0.316824	0.166	0.065	4.26441e-58		Mrpl14	1.07494e-19	0.137279	0.384	0.201	3.33801e-15		Fkbp3	5.99445e-09	0.233263	0.789	0.614	0.000186146
Got1	7.79412e-135	0.31836	0.437	0.185	2.42031e-130		Snrpf	5.09465e-16	0.263905	0.919	0.711	1.58204e-11		Ddn	2.40912e-09	0.0147951	0.011	0	7.48105e-05		Mat2b	1.49927e-62	0.375753	0.374	0.278	4.65568e-58		Hsd17b10	1.2347e-19	0.18343	0.439	0.253	3.8341e-15		Mical1	6.00452e-09	0.251534	0.188	0.079	0.000186459
Abcf1	1.15068e-134	0.32497	0.658	0.35	3.5732e-130		Polr3h	5.51977e-16	0.156964	0.292	0.12	1.71405e-11		Mgst1	2.40912e-09	0.0145565	0.011	0	7.48105e-05		Agfg2	4.23521e-62	0.228346	0.102	0.022	1.31516e-57		Aspscr1	1.50034e-19	0.140166	0.201	0.087	4.65899e-15		Snx14	6.29809e-09	0.204336	0.17	0.068	0.000195574
Kpna3	2.1673e-134	0.257382	0.319	0.108	6.7301e-130		Gpr162	5.9383e-16	0.00789669	0.007	0	1.84402e-11		Spag6	2.42739e-09	0.0176418	0.011	0	7.53776e-05		Pak6	4.91223e-62	0.175204	0.065	0.003	1.52539e-57		Mrpl33	1.59146e-19	0.212011	0.63	0.424	4.94197e-15		Gm9917	6.32166e-09	0.0298871	0.018	0.001	0.000196307
Abcc1	4.29533e-134	0.25891	0.274	0.082	1.33383e-129		Kpnb1	6.41584e-16	0.243935	0.59	0.329	1.99231e-11		Colgalt2	2.42739e-09	0.0174772	0.011	0	7.53776e-05		Hjurp	1.29199e-61	0.350848	0.214	0.106	4.01202e-57		Klhdc1	1.69977e-19	0.072542	0.075	0.019	5.2783e-15		Prr29	6.3339e-09	0.0281797	0.018	0.001	0.000196687
Bop1	8.34265e-134	0.26335	0.295	0.096	2.59064e-129		Tmem158	6.70756e-16	0.143264	0.169	0.055	2.0829e-11		Eno2	2.42739e-09	0.0158081	0.011	0	7.53776e-05		Atp6v1d	2.05144e-61	0.345281	0.251	0.14	6.37032e-57		Eva1b	1.72661e-19	0.132866	0.281	0.136	5.36164e-15		Phyh	6.50631e-09	0.164574	0.193	0.079	0.00020204
Clns1a	1.12269e-133	0.302157	0.507	0.232	3.48629e-129		Mrpl54	7.65226e-16	0.227895	0.566	0.306	2.37626e-11		Gp5	2.42739e-09	0.0151231	0.011	0	7.53776e-05		Camk2g	2.13929e-61	0.287509	0.16	0.061	6.64314e-57		Ctps2	1.92796e-19	0.134774	0.232	0.106	5.98689e-15		Chst10	6.64814e-09	0.129413	0.142	0.051	0.000206445
Frmd4b	1.72826e-133	0.30907	0.185	0.037	5.36675e-129		1810032O08Rik	7.7155e-16	0.151757	0.285	0.117	2.39589e-11		Gpr153	2.42739e-09	0.0148954	0.011	0	7.53776e-05		Tk2	2.98407e-61	0.307754	0.173	0.072	9.26644e-57		Wasf2	2.56217e-19	0.175314	0.412	0.232	7.95632e-15		Tmem156	6.7352e-09	0.163171	0.174	0.069	0.000209148
Noa1	2.56226e-133	0.266068	0.303	0.101	7.95658e-129		Caprin1	8.94222e-16	0.259714	0.722	0.444	2.77683e-11		Chmp4c	2.42739e-09	0.0144715	0.011	0	7.53776e-05		Spn	3.34168e-61	0.365161	0.268	0.153	1.03769e-56		Rnf166	2.60114e-19	0.160006	0.433	0.24	8.07732e-15		Gm26517	6.76642e-09	0.108676	0.092	0.026	0.000210118
Plscr1	2.82404e-133	0.295015	0.153	0.023	8.76949e-129		Gnl1	9.06147e-16	0.218384	0.515	0.266	2.81386e-11		Aoc3	2.42739e-09	0.0137185	0.011	0	7.53776e-05		Vrk3	4.02639e-61	0.298018	0.177	0.074	1.25031e-56		Dynll1	2.91253e-19	0.255848	0.813	0.655	9.04429e-15		Tecr	7.01078e-09	0.235825	0.615	0.411	0.000217706
Nampt	4.84146e-132	0.256311	0.257	0.074	1.50342e-127		Wdr4	1.08542e-15	0.155393	0.234	0.088	3.37056e-11		Cxcl13	2.42739e-09	0.0118551	0.011	0	7.53776e-05		Adgre5	5.14553e-61	0.220272	0.667	0.582	1.59784e-56		Gsk3b	2.94257e-19	0.125768	0.432	0.232	9.13757e-15		Prex1	7.02583e-09	0.201785	0.472	0.267	0.000218173
Rnf19b	1.75195e-131	0.298088	0.371	0.143	5.44034e-127		Piezo1	1.09354e-15	0.159826	0.176	0.058	3.39577e-11		Gapdhs	2.42739e-09	0.0116529	0.011	0	7.53776e-05		Fuca1	5.63237e-61	0.327251	0.221	0.111	1.74902e-56		Trappc6a	2.95181e-19	0.152054	0.298	0.149	9.16627e-15		Cutc	7.25158e-09	0.134369	0.151	0.056	0.000225183
Gsto1	2.52983e-131	0.28638	0.276	0.088	7.85589e-127		Atp5b	1.12895e-15	0.228248	0.98	0.853	3.50572e-11		Platr31	2.42739e-09	0.0116326	0.011	0	7.53776e-05		Rnf187	8.39556e-61	0.382226	0.386	0.294	2.60707e-56		Smco4	3.09038e-19	0.193717	0.465	0.281	9.59655e-15		Micu2	7.41864e-09	0.155678	0.243	0.11	0.000230371
Slc39a6	2.74014e-131	0.264341	0.305	0.101	8.50897e-127		Erh	1.13928e-15	0.278807	0.637	0.382	3.53781e-11		Fgf18	2.42739e-09	0.010842	0.011	0	7.53776e-05		Tcp11l2	1.04049e-60	0.282229	0.16	0.061	3.23103e-56		Tln1	3.56259e-19	0.182219	0.671	0.441	1.10629e-14		Metap1d	7.49846e-09	0.166967	0.138	0.049	0.00023285
Ddx3x	7.91212e-131	0.329591	0.616	0.32	2.45695e-126		Btg3	1.20774e-15	0.237239	0.495	0.253	3.75041e-11		Trav7d-4	2.42739e-09	0.00799447	0.011	0	7.53776e-05		Ramp1	1.23403e-60	0.106943	0.429	0.253	3.83203e-56		Fmnl1	3.66758e-19	0.145965	0.263	0.127	1.1389e-14		Cytip	7.52657e-09	0.223959	0.569	0.351	0.000233723
Reep3	1.47116e-130	0.28809	0.339	0.124	4.56838e-126		Psmg4	1.26743e-15	0.207835	0.525	0.274	3.93576e-11		Scg2	2.42739e-09	0.00776764	0.011	0	7.53776e-05		Ifnar1	1.70933e-60	0.327164	0.206	0.099	5.308e-56		Plxdc1	3.69927e-19	0.0379018	0.028	0.003	1.14874e-14		Aaed1	7.52801e-09	0.126477	0.156	0.058	0.000233767
Grasp	2.30791e-130	0.235839	0.207	0.048	7.16676e-126		Slc9b2	1.298e-15	0.025258	0.027	0.002	4.03067e-11		Thoc1	2.45819e-09	0.231749	0.393	0.147	7.63341e-05		Hint2	1.95134e-60	0.324807	0.207	0.1	6.05948e-56		Tmod3	3.85313e-19	0.220997	0.521	0.333	1.19651e-14		Abat	7.61494e-09	0.0261166	0.009	0	0.000236467
Srfbp1	8.07226e-130	0.230993	0.223	0.057	2.50668e-125		Atic	1.33828e-15	0.182526	0.431	0.204	4.15575e-11		3110082I17Rik	2.49479e-09	0.113922	0.101	0.017	7.74707e-05		Rnf13	2.38903e-60	0.278776	0.146	0.052	7.41864e-56		Spint2	3.93777e-19	0.186087	0.378	0.21	1.2228e-14		Ankrd35	7.64277e-09	0.0208423	0.009	0	0.000237331
Lsm7	1.38625e-129	0.294574	0.469	0.209	4.30471e-125		Pgap1	1.51802e-15	0.126431	0.075	0.015	4.7139e-11		Polrmt	2.61492e-09	0.117585	0.146	0.031	8.12012e-05		4833420G17Rik	3.84137e-60	0.369283	0.286	0.179	1.19286e-55		Gm9493	4.22311e-19	0.203303	0.515	0.325	1.3114e-14		Plekhh1	7.64277e-09	0.0156794	0.009	0	0.000237331
Il10ra	1.7827e-129	0.246431	0.151	0.022	5.53582e-125		Psmd12	1.53772e-15	0.23777	0.742	0.439	4.77509e-11		Snrpa	2.63768e-09	0.304013	0.573	0.257	8.19077e-05		Atraid	4.23768e-60	0.297173	0.19	0.084	1.31593e-55		Me2	4.46608e-19	0.149772	0.284	0.142	1.38685e-14		AC161607.1	7.67071e-09	0.0212788	0.009	0	0.000238198
Api5	1.82999e-129	0.279428	0.472	0.206	5.68266e-125		Kti12	1.69774e-15	0.234666	0.556	0.298	5.27198e-11		Fam110a	2.7869e-09	0.1475	0.191	0.049	8.65416e-05		Pja2	4.81733e-60	0.263691	0.126	0.038	1.49593e-55		Paip2	4.81907e-19	0.192309	0.713	0.496	1.49647e-14		Skap1	7.70397e-09	0.205484	0.885	0.703	0.000239231
Selenoi	2.73072e-129	0.257178	0.313	0.107	8.4797e-125		Rpl13	1.75035e-15	0.110771	1	1	5.43535e-11		Bag5	2.79574e-09	0.278166	0.551	0.24	8.68161e-05		Tsc22d3	4.89951e-60	0.233007	0.103	0.023	1.52144e-55		Eci2	5.09803e-19	0.113998	0.218	0.097	1.58309e-14		1810012K16Rik	7.72687e-09	0.0110338	0.009	0	0.000239943
Tmem185b	6.12757e-129	0.248774	0.261	0.077	1.90279e-124		Fam210a	1.80987e-15	0.198615	0.319	0.141	5.62017e-11		Hnrnpa0	2.8054e-09	0.313785	0.989	0.829	8.71159e-05		Arhgap25	5.8823e-60	0.289795	0.155	0.058	1.82663e-55		Herc6	5.59199e-19	0.158253	0.246	0.116	1.73648e-14		Sppl2b	8.13653e-09	0.12323	0.092	0.026	0.000252664
Tbl3	9.02958e-129	0.24683	0.273	0.084	2.80396e-124		Supt16	1.83238e-15	0.277825	0.692	0.428	5.69008e-11		Slc4a7	2.82779e-09	0.277459	0.483	0.203	8.78114e-05		Dnmt1	6.7252e-60	0.309235	0.181	0.078	2.08838e-55		Pgk1	5.61422e-19	0.229118	0.661	0.468	1.74338e-14		Pink1	8.73631e-09	0.178634	0.248	0.113	0.000271289
Wdr5	1.87396e-128	0.23476	0.24	0.067	5.81922e-124		Tnfsf9	1.88954e-15	0.209811	0.159	0.052	5.8676e-11		Fastkd3	2.8436e-09	0.153743	0.225	0.063	8.83025e-05		Tasp1	6.83939e-60	0.369366	0.232	0.124	2.12383e-55		Rpl34	5.88585e-19	0.110579	1	0.999	1.82773e-14		Slc9a9	9.19318e-09	0.170916	0.335	0.169	0.000285476
Rbmxl1	6.30905e-128	0.29791	0.491	0.226	1.95915e-123		Nol12	1.91032e-15	0.180675	0.427	0.206	5.9321e-11		Gpn1	3.04075e-09	0.218768	0.449	0.178	9.44245e-05		Nsmce1	7.04411e-60	0.350694	0.267	0.156	2.18741e-55		Scarb2	5.95539e-19	0.125187	0.252	0.119	1.84933e-14		Prelid1	9.27952e-09	0.253893	0.638	0.453	0.000288157
Lsg1	1.00433e-127	0.273029	0.433	0.183	3.11875e-123		Il21	1.95834e-15	0.0711377	0.031	0.003	6.08124e-11		Zgpat	3.06434e-09	0.148844	0.315	0.103	9.51569e-05		Phf1	9.76053e-60	0.26415	0.136	0.045	3.03094e-55		Pigx	6.25417e-19	0.143753	0.381	0.203	1.94211e-14		Zmynd8	9.70139e-09	0.152277	0.394	0.204	0.000301257
Serpinb9	1.80169e-127	0.538865	0.376	0.162	5.59479e-123		Treml2	1.99279e-15	0.11027	0.081	0.017	6.1882e-11		Atf4	3.07266e-09	0.412651	0.798	0.473	9.54154e-05		Arhgap4	1.51211e-59	0.2934	0.183	0.079	4.69554e-55		Creb3	6.37308e-19	0.0988001	0.158	0.062	1.97903e-14		Zdhhc2	1.01124e-08	0.0890188	0.046	0.008	0.000314021
Utp15	7.01707e-127	0.243043	0.303	0.102	2.17901e-122		Naa25	2.40963e-15	0.162619	0.353	0.159	7.48262e-11		Polr1a	3.08999e-09	0.178668	0.36	0.127	9.59536e-05		Ppp3cc	1.66263e-59	0.313392	0.188	0.084	5.16296e-55		Msrb2	6.6239e-19	0.0989669	0.129	0.046	2.05692e-14		Cdkn2c	1.01636e-08	0.122358	0.151	0.056	0.000315609
Psmd12	1.73388e-126	0.298599	0.648	0.341	5.38422e-122		Zdhhc13	2.62044e-15	0.112618	0.169	0.056	8.13727e-11		Ttc27	3.20274e-09	0.19448	0.292	0.096	9.94547e-05		Mctp2	2.26029e-59	0.255801	0.126	0.039	7.01888e-55		Prelid1	8.12316e-19	0.210908	0.639	0.444	2.52248e-14		Rgs14	1.03829e-08	0.12257	0.202	0.084	0.000322419
Arf4	2.32421e-126	0.307818	0.842	0.563	7.21738e-122		Wdr77	3.36708e-15	0.230065	0.38	0.183	1.04558e-10		Mllt11	3.21934e-09	0.174195	0.169	0.041	9.99701e-05		Nsmaf	3.01608e-59	0.310894	0.186	0.083	9.36584e-55		Stat1	1.03397e-18	0.262359	0.607	0.392	3.21078e-14		Gm9885	1.08203e-08	0.056345	0.037	0.006	0.000336002
Qk	2.34245e-125	0.276719	0.356	0.135	7.27402e-121		Rabggtb	3.65413e-15	0.188155	0.41	0.197	1.13472e-10		Fkbp1a	3.39587e-09	0.390033	0.876	0.525	0.000105452		Ehd3	3.05411e-59	0.306568	0.18	0.078	9.48392e-55		Gm26740	1.05358e-18	0.161195	0.736	0.457	3.27168e-14		Pitpnm1	1.10562e-08	0.174017	0.179	0.073	0.000343328
Lsm12	3.08499e-125	0.319234	0.654	0.357	9.57981e-121		Pla2g12a	3.74785e-15	0.170243	0.237	0.093	1.16382e-10		Hat1	3.42017e-09	0.292984	0.506	0.223	0.000106207		Ubxn1	7.38708e-59	0.321626	0.55	0.53	2.29391e-54		Rinl	1.07097e-18	0.160395	0.776	0.511	3.3257e-14		Adam12	1.14214e-08	0.0666101	0.041	0.007	0.000354667
Rwdd4a	6.24103e-125	0.268842	0.391	0.16	1.93803e-120		Surf2	3.89222e-15	0.176663	0.424	0.201	1.20865e-10		Impdh2	3.54798e-09	0.34861	0.674	0.348	0.000110175		Fchsd2	7.5175e-59	0.339377	0.252	0.14	2.33441e-54		Ssu72	1.11828e-18	0.184402	0.618	0.407	3.47259e-14		Rbck1	1.14334e-08	0.22596	0.44	0.259	0.00035504
Hnrnpd	8.6556e-125	0.308644	0.851	0.587	2.68782e-120		Pitrm1	4.09533e-15	0.169557	0.22	0.084	1.27172e-10		Map3k8	3.69869e-09	0.331402	0.517	0.233	0.000114855		Morf4l1	8.68387e-59	0.299393	0.644	0.657	2.6966e-54		Iah1	1.1938e-18	0.119668	0.229	0.105	3.7071e-14		Arhgef18	1.15663e-08	0.188676	0.193	0.081	0.000359167
Thop1	2.25613e-124	0.199302	0.155	0.027	7.00597e-120		Tardbp	4.09977e-15	0.252164	0.647	0.384	1.2731e-10		Bcl2a1a	3.8003e-09	0.14327	0.079	0.011	0.000118011		Etnk1	9.26342e-59	0.382522	0.33	0.226	2.87657e-54		Cd3g	1.23344e-18	0.165518	0.995	0.959	3.83019e-14		Rpl13a	1.17537e-08	0.243665	0.894	0.818	0.000364989
Ikzf3	9.38963e-124	0.423525	0.631	0.357	2.91576e-119		Psmb7	4.20844e-15	0.235933	0.624	0.35	1.30685e-10		Rmdn3	3.88742e-09	0.157844	0.236	0.068	0.000120716		Gltp	1.32086e-58	0.348509	0.254	0.145	4.10165e-54		Sema4d	1.28792e-18	0.163485	0.343	0.186	3.99939e-14		Man2b1	1.18149e-08	0.218324	0.495	0.31	0.000366888
Smyd2	1.01902e-123	0.228461	0.241	0.07	3.16436e-119		Nmd3	4.37287e-15	0.227903	0.505	0.264	1.35791e-10		Fam210a	3.99645e-09	0.250292	0.382	0.145	0.000124102		Ranbp10	1.57174e-58	0.302311	0.164	0.066	4.88073e-54		Abhd17a	1.48773e-18	0.187803	0.49	0.297	4.61983e-14		Ndufb11	1.24923e-08	0.234219	0.812	0.642	0.000387924
Eef1d	1.03318e-123	0.261293	0.959	0.842	3.20835e-119		Slc25a5	4.74285e-15	0.252778	0.946	0.834	1.4728e-10		Pisd	4.13848e-09	0.21486	0.303	0.102	0.000128512		Trpc4ap	1.98085e-58	0.35454	0.283	0.177	6.15113e-54		Syt11	1.6073e-18	0.097327	0.08	0.022	4.99113e-14		Kcnk7	1.25326e-08	0.0738784	0.05	0.01	0.000389174
Ube2n	1.09952e-123	0.31223	0.662	0.365	3.41435e-119		Polr1c	4.76388e-15	0.221175	0.559	0.303	1.47933e-10		Rps8	4.19689e-09	0.178937	1	0.999	0.000130326		Bscl2	2.07256e-58	0.31383	0.203	0.098	6.43593e-54		Sgms1	1.68815e-18	0.112921	0.117	0.041	5.2422e-14		Jakmip1	1.27173e-08	0.220298	0.317	0.159	0.000394911
Rrp7a	1.29821e-123	0.264703	0.423	0.179	4.03132e-119		Rmdn3	4.79451e-15	0.121735	0.19	0.066	1.48884e-10		Thoc7	4.48829e-09	0.325997	0.787	0.424	0.000139375		Ggnbp2	2.61814e-58	0.37549	0.452	0.387	8.13011e-54		Lbr	1.69358e-18	0.203316	0.501	0.307	5.25906e-14		Acaa1a	1.28087e-08	0.167526	0.252	0.117	0.000397747
Gm26571	1.36187e-123	0.156826	0.109	0.008	4.22902e-119		Cdk6	4.96332e-15	0.156201	0.21	0.078	1.54126e-10		Twsg1	4.56923e-09	0.0917169	0.146	0.032	0.000141888		Galnt12	3.9649e-58	0.292779	0.182	0.08	1.23122e-53		Fbxo22	1.78337e-18	0.0962188	0.233	0.107	5.5379e-14		Arhgef1	1.30904e-08	0.222861	0.624	0.385	0.000406496
Ube2e1	2.42709e-123	0.288493	0.58	0.288	7.53685e-119		Shmt2	5.00273e-15	0.165732	0.298	0.129	1.5535e-10		Synpo	4.6505e-09	0.0475353	0.045	0.004	0.000144412		Cwc15	4.22263e-58	0.324209	0.565	0.546	1.31125e-53		Pdk1	1.85709e-18	0.139373	0.252	0.121	5.76681e-14		Npc2	1.35e-08	0.228263	0.638	0.449	0.000419216
Fas	2.79005e-123	0.285495	0.337	0.128	8.66393e-119		Ppic	5.09651e-15	0.0408963	0.027	0.002	1.58262e-10		Polr3d	4.8929e-09	0.253388	0.449	0.186	0.000151939		Ndufa7	4.92261e-58	0.350654	0.495	0.447	1.52862e-53		Rtp4	1.88875e-18	0.177309	0.249	0.121	5.86513e-14		Cox20	1.35051e-08	0.181087	0.358	0.187	0.000419375
Hat1	2.88099e-123	0.264248	0.372	0.147	8.94633e-119		Carnmt1	5.21888e-15	0.175946	0.403	0.19	1.62062e-10		Spast	5.09822e-09	0.175481	0.315	0.105	0.000158315		1700020I14Rik	5.04975e-58	0.388262	0.381	0.295	1.5681e-53		C2cd5	2.02423e-18	0.125321	0.187	0.081	6.28585e-14		Crot	1.36341e-08	0.238832	0.404	0.221	0.000423378
Gapdh	3.04436e-123	0.289393	0.944	0.781	9.45366e-119		2810004N23Rik	5.34241e-15	0.192916	0.414	0.202	1.65898e-10		Mbtd1	5.10522e-09	0.260977	0.416	0.162	0.000158532		Abcg3	6.89462e-58	0.228004	0.108	0.028	2.14099e-53		Cenpx	2.15543e-18	0.16096	0.481	0.282	6.69325e-14		Xlr4b	1.37884e-08	0.207498	0.335	0.178	0.000428172
Utp4	6.06005e-123	0.234013	0.271	0.086	1.88183e-118		Dtymk	5.51482e-15	0.179084	0.424	0.206	1.71252e-10		Ppp4r1	5.34637e-09	0.184912	0.191	0.051	0.000166021		Brd9	7.70515e-58	0.290643	0.165	0.067	2.39268e-53		Sh3bp1	2.25115e-18	0.13591	0.201	0.089	6.99048e-14		Rmnd5b	1.41325e-08	0.151984	0.183	0.075	0.000438858
Tnfsf8	7.87267e-123	0.540402	0.146	0.023	2.4447e-118		Ikbkap	5.52665e-15	0.172646	0.278	0.117	1.71619e-10		Supt6	5.35211e-09	0.285605	0.539	0.243	0.000166199		Supt20	9.51356e-58	0.348644	0.239	0.132	2.95425e-53		4921511I17Rik	2.2915e-18	0.0254855	0.014	0.001	7.11578e-14		Rbm24	1.44002e-08	0.144517	0.11	0.036	0.000447169
Tmem38b	1.13649e-121	0.237892	0.241	0.07	3.52913e-117		Pop1	5.60697e-15	0.137112	0.244	0.096	1.74113e-10		Pim3	5.68558e-09	0.323967	0.719	0.37	0.000176554		Ddrgk1	1.03286e-57	0.353609	0.355	0.257	3.20733e-53		Nfu1	2.41192e-18	0.16162	0.264	0.132	7.48973e-14		Zfp652	1.48266e-08	0.202054	0.381	0.202	0.000460409
Pinx1	1.3625e-121	0.24803	0.279	0.092	4.23098e-117		Cox5a	5.69313e-15	0.232936	0.963	0.826	1.76789e-10		Ezh2	6.08368e-09	0.332512	0.303	0.107	0.000188916		Pigx	1.43008e-57	0.334617	0.266	0.158	4.44083e-53		Top2a	2.41254e-18	0.076066	0.057	0.013	7.49165e-14		Gpd1l	1.49632e-08	0.14186	0.119	0.04	0.000464651
Chchd2	3.43366e-121	0.239579	0.99	0.931	1.06626e-116		Sde2	5.8186e-15	0.206753	0.556	0.294	1.80685e-10		Cnot7	6.18406e-09	0.155512	0.416	0.154	0.000192034		AC149090.1	1.53082e-57	0.337667	0.252	0.141	4.75366e-53		AI413582	2.43716e-18	0.1195	0.226	0.104	7.5681e-14		Pstk	1.53186e-08	0.187979	0.22	0.1	0.000475688
Nol9	3.93686e-121	0.230966	0.267	0.085	1.22251e-116		Pelp1	6.00521e-15	0.152879	0.224	0.086	1.8648e-10		Emb	6.37875e-09	0.387258	0.73	0.383	0.000198079		Fam49a	2.06224e-57	0.238024	0.116	0.033	6.40388e-53		Ssbp2	2.56275e-18	0.145894	0.204	0.092	7.9581e-14		Ero1l	1.54676e-08	0.291112	0.5	0.328	0.000480315
Btaf1	5.79899e-121	0.244028	0.287	0.096	1.80076e-116		Gtf2e2	6.0504e-15	0.136141	0.359	0.161	1.87883e-10		Gm19265	6.45053e-09	0.0355965	0.022	0.001	0.000200308		2810001G20Rik	2.0627e-57	0.298504	0.189	0.086	6.40531e-53		Ntrk3	2.60551e-18	0.0943581	0.135	0.05	8.09089e-14		Krit1	1.57882e-08	0.267426	0.642	0.476	0.000490271
Nom1	6.34862e-121	0.266452	0.416	0.177	1.97144e-116		Aasdhppt	6.11832e-15	0.163959	0.407	0.192	1.89992e-10		Gclc	6.464e-09	0.34064	0.404	0.16	0.000200726		Pitpnc1	2.25811e-57	0.35084	0.251	0.142	7.01212e-53		Eid1	2.60964e-18	0.141945	0.382	0.207	8.1037e-14		Pik3r1	1.62423e-08	0.223261	0.56	0.343	0.000504373
Pak1ip1	8.29985e-121	0.282955	0.548	0.269	2.57735e-116		Tm2d3	6.12134e-15	0.204128	0.532	0.282	1.90086e-10		Nkain1	6.47431e-09	0.0255989	0.022	0.001	0.000201047		Slc2a3	2.70917e-57	0.343887	0.232	0.127	8.41278e-53		Il9r	2.76611e-18	0.0195445	0.015	0.001	8.5896e-14		Zfp414	1.6526e-08	0.1206	0.092	0.027	0.000513182
Tmem11	1.43716e-120	0.252675	0.361	0.141	4.46281e-116		Nat10	6.29397e-15	0.155815	0.298	0.128	1.95447e-10		Pcdhgc4	6.64317e-09	0.0203589	0.022	0.001	0.00020629		2010300C02Rik	3.18066e-57	0.234831	0.113	0.032	9.8769e-53		Aamdc	2.96365e-18	0.0993803	0.197	0.085	9.20303e-14		Syde1	1.66122e-08	0.0669608	0.046	0.009	0.00051586
Bend3	1.70744e-120	0.175278	0.116	0.011	5.30212e-116		Txlna	7.02655e-15	0.19807	0.376	0.178	2.18196e-10		Farsb	6.68219e-09	0.244434	0.427	0.172	0.000207502		Unc13d	3.91026e-57	0.290131	0.171	0.073	1.21425e-52		Evl	3.04623e-18	0.12341	0.619	0.362	9.45947e-14		Hmgb2	1.70224e-08	0.189482	0.78	0.577	0.000528598
Stt3a	3.25669e-120	0.275803	0.471	0.215	1.0113e-115		Riox1	7.16735e-15	0.186343	0.461	0.229	2.22568e-10		mt-Co2	6.88872e-09	0.159846	1	1	0.000213915		Smap1	3.92933e-57	0.364131	0.373	0.279	1.22017e-52		Dapp1	3.25861e-18	0.127905	0.194	0.085	1.0119e-13		Slc38a9	1.70249e-08	0.159084	0.216	0.095	0.000528674
Rpl15	3.56152e-120	0.155104	1	0.998	1.10596e-115		Trmt6	7.89786e-15	0.186966	0.376	0.181	2.45252e-10		Polr2f	6.88981e-09	0.349011	0.798	0.463	0.000213949		Hmgn2	4.85702e-57	0.372888	0.321	0.22	1.50825e-52		Psph	3.37879e-18	0.132592	0.293	0.15	1.04921e-13		Phf11b	1.7241e-08	0.165091	0.252	0.119	0.000535385
Tardbp	4.25528e-120	0.3074	0.572	0.295	1.32139e-115		Ntmt1	8.33935e-15	0.177987	0.336	0.153	2.58962e-10		Noct	6.90302e-09	0.208542	0.258	0.083	0.000214359		Fam160a2	4.90874e-57	0.22487	0.101	0.024	1.52431e-52		Samd9l	3.55205e-18	0.17044	0.324	0.168	1.10302e-13		Gclm	1.79657e-08	0.157308	0.156	0.062	0.000557888
Hnrnpa2b1	4.89672e-120	0.25794	0.978	0.851	1.52058e-115		Rpl14	8.47567e-15	0.132448	1	0.999	2.63195e-10		Dnaja1	6.91725e-09	0.359883	0.978	0.887	0.000214801		Psenen	4.94129e-57	0.341601	0.515	0.465	1.53442e-52		Gpcpd1	3.62246e-18	0.141333	0.217	0.101	1.12488e-13		Il17rc	1.86849e-08	0.0318789	0.018	0.002	0.000580223
Dnajc11	7.27205e-119	0.23284	0.288	0.098	2.25819e-114		Fam241a	8.52779e-15	0.112064	0.166	0.055	2.64813e-10		Zfp330	6.92159e-09	0.248636	0.562	0.249	0.000214936		Abcb1a	5.88674e-57	0.273465	0.147	0.054	1.82801e-52		1700017B05Rik	3.75056e-18	0.147529	0.217	0.102	1.16466e-13		Rap2b	1.91604e-08	0.198169	0.271	0.133	0.000594987
Usp36	8.49283e-119	0.265875	0.303	0.108	2.63728e-114		Ascc3	8.77794e-15	0.175681	0.478	0.24	2.72581e-10		Ddx1	7.12943e-09	0.247915	0.449	0.183	0.00022139		Cd38	8.80917e-57	0.303238	0.171	0.073	2.73551e-52		Kcnab2	3.79009e-18	0.11063	0.144	0.056	1.17694e-13		Sema4d	2.07437e-08	0.21114	0.353	0.192	0.000644153
Mthfd2	1.21779e-118	0.283383	0.393	0.168	3.78159e-114		Pbdc1	8.89141e-15	0.213395	0.461	0.24	2.76105e-10		Polr2h	7.15298e-09	0.277379	0.674	0.321	0.000222122		Card11	9.24119e-57	0.271463	0.159	0.063	2.86967e-52		Eps15	3.89676e-18	0.167439	0.257	0.129	1.21006e-13		Taldo1	2.16549e-08	0.231561	0.679	0.517	0.000672449
Tmem158	2.18994e-118	0.189097	0.133	0.019	6.80043e-114		Ergic2	1.04917e-14	0.179082	0.515	0.265	3.25797e-10		Dcun1d5	7.24577e-09	0.346058	0.809	0.481	0.000225003		Helz	1.40971e-56	0.331751	0.223	0.118	4.37757e-52		Tmem156	4.24978e-18	0.10074	0.161	0.065	1.31968e-13		Hcfc1r1	2.17715e-08	0.158873	0.216	0.096	0.000676072
Clptm1l	3.47771e-118	0.283886	0.558	0.277	1.07993e-113		Dnajb11	1.05585e-14	0.269284	0.698	0.438	3.27873e-10		Sms	7.45187e-09	0.346276	0.753	0.403	0.000231403		Paxx	1.75726e-56	0.280629	0.164	0.068	5.45683e-52		Vamp5	4.37034e-18	0.105143	0.214	0.095	1.35712e-13		Msh2	2.23654e-08	0.210258	0.252	0.122	0.000694514
Gm26669	3.64938e-118	0.234071	0.209	0.054	1.13324e-113		Egr1	1.09591e-14	0.467978	0.407	0.216	3.40314e-10		Zbtb16	7.47892e-09	0.309187	0.674	0.355	0.000232243		Gcnt2	1.80356e-56	0.218391	0.085	0.015	5.6006e-52		Dctn6	4.43714e-18	0.156481	0.316	0.166	1.37786e-13		Zfp26	2.26885e-08	0.189875	0.179	0.076	0.000704547
Dnaja1	5.10858e-118	0.303945	0.969	0.844	1.58637e-113		Tmem65	1.1164e-14	0.21588	0.22	0.087	3.46676e-10		Rpl4	7.51316e-09	0.213825	1	0.99	0.000233306		Acap1	1.80875e-56	0.349986	0.28	0.174	5.61672e-52		Ndufb3	5.83736e-18	0.184504	0.614	0.399	1.81268e-13		Ralbp1	2.32653e-08	0.201526	0.45	0.26	0.000722457
Hyou1	6.137e-118	0.238708	0.265	0.085	1.90572e-113		Ube2q2	1.20933e-14	0.199685	0.495	0.261	3.75534e-10		Myb	7.57891e-09	0.122358	0.101	0.018	0.000235348		Fam49b	1.91408e-56	0.309149	0.573	0.557	5.94379e-52		Gipc1	5.9618e-18	0.0908135	0.14	0.053	1.85132e-13		Abca7	2.33617e-08	0.159169	0.138	0.051	0.00072545
Gnpnat1	7.2778e-118	0.257763	0.393	0.164	2.25997e-113		Sept7	1.36194e-14	0.254326	0.942	0.766	4.22923e-10		Mrps18b	7.65317e-09	0.24867	0.494	0.208	0.000237654		Nfatc3	2.2567e-56	0.349209	0.293	0.185	7.00772e-52		Rpl26	6.04105e-18	0.105205	1	1	1.87593e-13		Galnt7	2.38457e-08	0.179113	0.248	0.118	0.000740482
Farsa	7.32812e-118	0.249082	0.418	0.178	2.2756e-113		Psma3	1.43675e-14	0.245919	0.929	0.745	4.46155e-10		Ppid	7.82043e-09	0.320193	0.831	0.443	0.000242848		Cnpy2	2.5224e-56	0.352715	0.303	0.201	7.83279e-52		Cep70	6.07662e-18	0.0717009	0.066	0.017	1.88697e-13		Sept1	2.47079e-08	0.196261	0.862	0.678	0.000767255
Mmd	2.34752e-117	0.280631	0.298	0.108	7.28976e-113		Rragd	1.4394e-14	0.108779	0.088	0.021	4.46977e-10		Bdp1	7.87239e-09	0.278795	0.629	0.292	0.000244461		R3hdm4	2.8816e-56	0.308961	0.204	0.102	8.94822e-52		Sri	6.17761e-18	0.155667	0.829	0.595	1.91833e-13		Lactb	2.54192e-08	0.162843	0.202	0.089	0.000789342
Jarid2	4.58778e-117	0.34201	0.389	0.169	1.42464e-112		Pdss1	1.44059e-14	0.0913293	0.102	0.026	4.47348e-10		Ikbkap	8.13926e-09	0.186711	0.337	0.12	0.000252748		Cdyl2	2.90916e-56	0.264011	0.142	0.052	9.03382e-52		Lsm4	6.35522e-18	0.212388	0.719	0.52	1.97349e-13		Hdhd5	2.58902e-08	0.168722	0.28	0.137	0.000803967
Prkch	5.48297e-117	0.316239	0.621	0.34	1.70263e-112		Ddx49	1.45058e-14	0.155365	0.346	0.155	4.50448e-10		Abtb2	8.7269e-09	0.209853	0.236	0.072	0.000270997		Crip1	3.73536e-56	0.376776	0.35	0.233	1.15994e-51		Mindy2	6.86896e-18	0.115197	0.315	0.16	2.13302e-13		Cdk19	2.62013e-08	0.111072	0.115	0.038	0.000813629
Mrps28	6.23983e-117	0.254443	0.423	0.182	1.93765e-112		Gm15283	1.53264e-14	0.105143	0.122	0.035	4.75931e-10		Ehd1	9.22259e-09	0.275664	0.506	0.225	0.000286389		Tmem14c	5.46274e-56	0.324538	0.428	0.344	1.69634e-51		Chst10	6.90123e-18	0.0916417	0.129	0.048	2.14304e-13		Capn2	2.63911e-08	0.15143	0.165	0.066	0.000819521
Ubxn2a	1.03594e-116	0.278726	0.387	0.162	3.2169e-112		Eif2b1	1.64072e-14	0.115282	0.237	0.092	5.09493e-10		Cebpz	1.02201e-08	0.368683	0.73	0.395	0.000317364		Rpl21	5.55723e-56	0.0965421	0.999	1	1.72569e-51		Dmac1	6.919e-18	0.168155	0.398	0.229	2.14856e-13		Lck	2.66617e-08	0.209994	0.872	0.706	0.000827927
Ccr5	1.09502e-116	0.343746	0.409	0.179	3.40035e-112		Lsm12	1.72769e-14	0.246852	0.736	0.452	5.36501e-10		Eps15l1	1.03281e-08	0.163094	0.281	0.092	0.000320719		Dexi	6.97715e-56	0.275748	0.162	0.067	2.16661e-51		Ndufa8	7.90579e-18	0.189756	0.627	0.423	2.45498e-13		Vamp8	2.70844e-08	0.206343	0.569	0.349	0.000841052
Eif1ad	2.19754e-116	0.249958	0.396	0.166	6.82404e-112		Sms	1.73567e-14	0.220992	0.688	0.398	5.38977e-10		Tfrc	1.03295e-08	0.256882	0.629	0.296	0.000320761		Trim12c	7.20911e-56	0.321105	0.22	0.114	2.23865e-51		Atp11b	8.23531e-18	0.206649	0.461	0.282	2.55731e-13		Rex1bd	2.84457e-08	0.216446	0.55	0.339	0.000883324
Ndufa12	2.22717e-116	0.30242	0.693	0.401	6.91602e-112		Rap1a	1.74263e-14	0.25578	0.881	0.664	5.41139e-10		Ptger2	1.04477e-08	0.159735	0.213	0.061	0.000324432		Gm42372	7.53151e-56	0.207433	0.087	0.017	2.33876e-51		Ntan1	9.497e-18	0.119611	0.369	0.198	2.9491e-13		Snai3	2.86104e-08	0.155952	0.174	0.072	0.000888439
Dhx15	2.77535e-116	0.281172	0.584	0.303	8.61831e-112		Slc29a1	1.85557e-14	0.202541	0.407	0.202	5.76211e-10		Myo10	1.06709e-08	0.166749	0.146	0.033	0.000331365		Rhoc	1.09373e-55	0.246443	0.134	0.046	3.39637e-51		Tprgl	1.03976e-17	0.163628	0.544	0.339	3.22876e-13		Zfp846	2.86497e-08	0.14178	0.11	0.037	0.00088966
Krr1	3.70334e-116	0.276885	0.441	0.198	1.15e-111		Prep	1.92645e-14	0.141219	0.227	0.089	5.98222e-10		mt-Co3	1.07003e-08	0.162621	1	1	0.000332276		Tmem160	1.23827e-55	0.335939	0.482	0.431	3.8452e-51		C030034I22Rik	1.09076e-17	0.133756	0.144	0.058	3.38712e-13		Itpr3	2.88277e-08	0.166457	0.197	0.085	0.000895188
Ppip5k2	6.14046e-116	0.243713	0.301	0.107	1.9068e-111		Ifi27l2a	1.95369e-14	0.338441	0.627	0.376	6.0668e-10		Uqcr10	1.11795e-08	0.318267	0.787	0.448	0.000347159		Gbp7	1.43218e-55	0.328304	0.396	0.289	4.44735e-51		Ufc1	1.13802e-17	0.162159	0.536	0.326	3.53388e-13		Slc36a3os	2.96172e-08	0.0467268	0.028	0.003	0.000919702
A630089N07Rik	7.19405e-116	0.222241	0.201	0.052	2.23397e-111		Kars	1.99774e-14	0.190521	0.454	0.228	6.20357e-10		Tgtp2	1.13152e-08	0.172436	0.135	0.029	0.000351372		Ifi213	2.23343e-55	0.267474	0.135	0.047	6.93548e-51		Pitpnc1	1.20433e-17	0.152463	0.349	0.189	3.73981e-13		Sh3bgrl	2.97401e-08	0.114664	0.174	0.07	0.000923519
Arl1	1.30303e-115	0.287959	0.549	0.276	4.0463e-111		Pabpc4	2.0917e-14	0.231742	0.478	0.253	6.49535e-10		Txndc17	1.14346e-08	0.32742	0.764	0.433	0.00035508		Ankmy2	2.40493e-55	0.259633	0.141	0.052	7.46804e-51		Parvg	1.36689e-17	0.119909	0.201	0.091	4.24461e-13		Hscb	2.97653e-08	0.168263	0.216	0.097	0.000924301
Gmps	3.38773e-115	0.263711	0.499	0.238	1.05199e-110		Wdr18	2.09235e-14	0.213353	0.553	0.298	6.49737e-10		Usp1	1.18144e-08	0.313637	0.517	0.241	0.000366872		Calm2	3.16789e-55	0.298832	0.655	0.682	9.83726e-51		Mpc2	1.37403e-17	0.170742	0.541	0.331	4.26676e-13		Teddm2	2.99116e-08	0.039959	0.023	0.002	0.000928845
Net1	7.94618e-115	0.199439	0.179	0.04	2.46753e-110		Klf16	2.12647e-14	0.147059	0.21	0.08	6.60332e-10		Serpinb9	1.18148e-08	0.464042	0.494	0.235	0.000366884		Faah	3.92124e-55	0.300819	0.211	0.106	1.21766e-50		Ndufb10	1.40473e-17	0.181661	0.713	0.485	4.36211e-13		Ptgr1	3.00995e-08	0.037406	0.028	0.003	0.00093468
Kpna1	1.63164e-114	0.238987	0.319	0.119	5.06672e-110		Naca	2.16284e-14	0.161583	0.993	0.985	6.71627e-10		Eif3j1	1.19965e-08	0.331501	0.607	0.3	0.000372528		Cntrl	4.67352e-55	0.363927	0.315	0.214	1.45127e-50		Cd96	1.47779e-17	0.159548	0.324	0.171	4.58897e-13		Akap13	3.0212e-08	0.212507	0.683	0.471	0.000938172
Rcn1	3.29118e-114	0.230265	0.307	0.11	1.02201e-109		Elavl1	2.19932e-14	0.252753	0.705	0.436	6.82956e-10		Ubap2l	1.23098e-08	0.299987	0.753	0.393	0.000382258		Slc9a9	6.40618e-55	0.327143	0.222	0.119	1.98931e-50		Mfhas1	1.558e-17	0.106417	0.149	0.06	4.83807e-13		Gm10603	3.0573e-08	0.0338087	0.023	0.002	0.000949384
Cd24a	5.59703e-114	0.293452	0.114	0.012	1.73805e-109		Tgif2	2.2072e-14	0.164653	0.224	0.088	6.85403e-10		Fcf1	1.26751e-08	0.277421	0.584	0.276	0.000393599		Rnf130	6.73459e-55	0.288598	0.168	0.073	2.09129e-50		Snrnp25	1.69499e-17	0.112188	0.206	0.093	5.26345e-13		Dck	3.10061e-08	0.0806207	0.096	0.029	0.000962833
Cbfb	5.68732e-114	0.265722	0.494	0.234	1.76608e-109		Psmd14	2.23387e-14	0.220798	0.627	0.354	6.93683e-10		Wdr46	1.38965e-08	0.248685	0.348	0.132	0.000431529		Smim11	6.80065e-55	0.34539	0.296	0.196	2.11181e-50		Pnrc2	1.82137e-17	0.107288	0.336	0.174	5.65591e-13		Iqgap2	3.1093e-08	0.22124	0.261	0.129	0.000965531
Ier2	1.28909e-113	0.412585	0.819	0.588	4.00301e-109		Rpl35a	2.24545e-14	0.127696	1	0.998	6.9728e-10		Eif6	1.40301e-08	0.416694	0.831	0.521	0.000435677		Sdhaf4	1.22445e-54	0.303388	0.198	0.098	3.80228e-50		Iqgap2	1.82534e-17	0.15002	0.25	0.123	5.66822e-13		Celf2	3.13287e-08	0.214155	0.683	0.47	0.000972851
Mfsd14a	1.50863e-113	0.261752	0.473	0.221	4.68474e-109		Rock2	2.26337e-14	0.209143	0.475	0.249	7.02844e-10		Elp5	1.45063e-08	0.234126	0.337	0.125	0.000450465		Akr1a1	3.09142e-54	0.357593	0.369	0.284	9.59977e-50		Cby1	1.85603e-17	0.0616278	0.071	0.019	5.76352e-13		Ptpn6	3.16021e-08	0.219377	0.376	0.211	0.00098134
Chst2	1.66617e-113	0.259702	0.312	0.115	5.17396e-109		Eif1ad	2.28138e-14	0.212212	0.461	0.24	7.08438e-10		Pop1	1.47452e-08	0.18321	0.292	0.099	0.000457883		Hbp1	3.15509e-54	0.256112	0.133	0.047	9.79749e-50		Cacna1d	1.93927e-17	0.0222943	0.017	0.001	6.02201e-13		Tango2	3.21565e-08	0.141514	0.142	0.053	0.000998555
Nob1	1.67371e-113	0.252301	0.335	0.131	5.19736e-109		Nxt1	2.29921e-14	0.222205	0.431	0.219	7.13973e-10		Plxnd1	1.47987e-08	0.0983642	0.101	0.018	0.000459545		Mapk3	3.97543e-54	0.214069	0.104	0.028	1.23449e-49		Yipf1	1.99355e-17	0.131278	0.255	0.126	6.19056e-13		Man2a1	3.21695e-08	0.178458	0.17	0.07	0.00099896
Tex30	4.57798e-113	0.21834	0.29	0.102	1.4216e-108		Cd82	2.41295e-14	0.267204	0.898	0.731	7.49292e-10		Hook2	1.54497e-08	0.0976694	0.101	0.018	0.00047976		Zfp148	4.48468e-54	0.373174	0.342	0.251	1.39263e-49		Oasl2	2.01427e-17	0.0535796	0.041	0.008	6.25492e-13		Cep97	3.35812e-08	0.116709	0.147	0.055	0.0010428
Psma3	7.65994e-113	0.284481	0.897	0.672	2.37864e-108		Psmd1	2.44276e-14	0.177573	0.444	0.22	7.58549e-10		Utf1	1.5824e-08	0.297194	0.438	0.189	0.000491382		Abcg1	4.72151e-54	0.258971	0.13	0.044	1.46617e-49		Prrg1	2.05138e-17	0.0584304	0.046	0.009	6.37014e-13		Ints6l	3.37412e-08	0.105998	0.101	0.032	0.00104777
Yars2	1.17204e-112	0.214222	0.243	0.076	3.63953e-108		Ndufb6	2.46046e-14	0.249192	0.607	0.354	7.64046e-10		Ppig	1.81288e-08	0.340607	0.899	0.572	0.000562954		Cd4	4.79245e-54	0.302634	0.172	0.076	1.4882e-49		Arhgap25	2.24414e-17	0.0950523	0.221	0.101	6.96873e-13		Snrnp25	3.3846e-08	0.177709	0.216	0.098	0.00105102
Fcf1	2.27615e-112	0.245154	0.435	0.195	7.06814e-108		Rpl7l1	2.56949e-14	0.266168	0.705	0.436	7.97903e-10		Ptp4a2	1.84363e-08	0.333604	0.966	0.731	0.000572503		Mllt3	5.17818e-54	0.321576	0.222	0.119	1.60798e-49		Arhgef6	2.83634e-17	0.130885	0.401	0.22	8.80768e-13		Bet1	3.4132e-08	0.173848	0.261	0.128	0.0010599
Mdfic	2.41314e-112	0.235496	0.325	0.122	7.49353e-108		Qtrt2	2.71208e-14	0.177335	0.227	0.091	8.42182e-10		Nploc4	1.91073e-08	0.180145	0.191	0.053	0.00059334		Mrpl18	5.72983e-54	0.311872	0.472	0.417	1.77928e-49		4930452B06Rik	2.84873e-17	0.0102246	0.008	0	8.84617e-13		Dnajc9	3.75709e-08	0.235698	0.339	0.187	0.00116669
Plekha3	2.469e-112	0.218753	0.334	0.128	7.667e-108		Rpl23a	2.73532e-14	0.15725	0.993	0.986	8.49399e-10		P4ha1	1.94941e-08	0.230639	0.281	0.097	0.000605351		Cep250	5.95817e-54	0.254393	0.135	0.048	1.85019e-49		Mterf2	2.91947e-17	0.0674674	0.063	0.016	9.06584e-13		Ehmt2	3.80484e-08	0.172013	0.193	0.083	0.00118152
Agfg1	2.74417e-112	0.310716	0.614	0.336	8.52147e-108		Tgm2	2.93525e-14	0.0365369	0.02	0.001	9.11483e-10		Nme2	1.95039e-08	0.0843719	0.101	0.018	0.000605653		Heca	7.69065e-54	0.366812	0.258	0.158	2.38818e-49		St6gal1	2.94862e-17	0.0835324	0.08	0.023	9.15636e-13		Zfp398	3.80807e-08	0.182769	0.275	0.137	0.00118252
Mpzl3	4.73275e-112	0.22591	0.212	0.058	1.46966e-107		St3gal1	3.11051e-14	0.109084	0.146	0.046	9.65906e-10		Fam185a	1.95757e-08	0.158254	0.225	0.067	0.000607884		Atad2	2.69456e-53	0.300155	0.186	0.088	8.36742e-49		Ssna1	3.34672e-17	0.143223	0.32	0.169	1.03926e-12		Adam8	3.85945e-08	0.125893	0.083	0.024	0.00119847
Sigmar1	5.5579e-112	0.229631	0.264	0.089	1.72589e-107		Lrpprc	3.15017e-14	0.184778	0.312	0.14	9.78223e-10		BC005561	2.02347e-08	0.26593	0.483	0.214	0.000628348		Dap	3.05599e-53	0.328007	0.281	0.177	9.48978e-49		N4bp2l1	3.3634e-17	0.098605	0.164	0.069	1.04444e-12		Taok2	4.01064e-08	0.131373	0.188	0.08	0.00124543
Nop10	6.09045e-112	0.308023	0.844	0.607	1.89127e-107		Tmem70	3.23892e-14	0.141296	0.363	0.167	1.00578e-09		Dis3	2.08582e-08	0.224208	0.382	0.148	0.00064771		Dnajc9	3.79334e-53	0.326079	0.239	0.138	1.17795e-48		Hibch	3.49725e-17	0.119872	0.187	0.084	1.086e-12		Naga	4.15117e-08	0.136458	0.165	0.067	0.00128906
2700038G22Rik	1.18639e-111	0.199629	0.201	0.053	3.68408e-107		Myl12a	3.25572e-14	0.248516	0.898	0.685	1.011e-09		Cdc37	2.09909e-08	0.336453	0.888	0.586	0.000651832		Acadl	4.24128e-53	0.279914	0.181	0.084	1.31705e-48		Ywhah	3.68063e-17	0.198571	0.556	0.373	1.14295e-12		Comt	4.22116e-08	0.209458	0.326	0.181	0.0013108
Polr3g	1.96914e-111	0.190796	0.171	0.038	6.11478e-107		Rheb	3.25815e-14	0.238629	0.814	0.554	1.01175e-09		St3gal1	2.16289e-08	0.150635	0.18	0.048	0.000671643		Prkcb	4.81974e-53	0.333185	0.211	0.112	1.49667e-48		Rpl31	3.69327e-17	0.179221	0.937	0.826	1.14687e-12		Capns1	4.51902e-08	0.274852	0.523	0.343	0.00140329
Gars	2.1187e-111	0.246634	0.342	0.136	6.5792e-107		Wdr46	3.31808e-14	0.167328	0.292	0.129	1.03036e-09		Cystm1	2.19739e-08	0.199854	0.112	0.023	0.000682355		Cd7	4.94485e-53	0.338138	0.168	0.073	1.53552e-48		Xlr4a	3.70001e-17	0.153877	0.27	0.139	1.14897e-12		Rbm43	4.73118e-08	0.131859	0.165	0.067	0.00146917
Pop1	4.69929e-111	0.216753	0.194	0.05	1.45927e-106		Ahctf1	3.42363e-14	0.215104	0.468	0.243	1.06314e-09		Gpr65	2.23082e-08	0.303602	0.674	0.348	0.000692738		Rpl36a	5.34158e-53	0.170063	0.946	0.976	1.65872e-48		Myo18a	3.87931e-17	0.0874513	0.109	0.038	1.20464e-12		St7l	4.96609e-08	0.142849	0.174	0.073	0.00154212
Banf1	1.1298e-110	0.296497	0.644	0.367	3.50837e-106		Sf3b4	3.48695e-14	0.1582	0.434	0.212	1.0828e-09		Gpatch4	2.40227e-08	0.274718	0.528	0.244	0.000745976		Stap1	7.81723e-53	0.353189	0.376	0.274	2.42748e-48		Cd247	4.0186e-17	0.19152	0.487	0.301	1.2479e-12		Itpr1	4.96805e-08	0.19581	0.211	0.098	0.00154273
Rad23b	3.57381e-110	0.259322	0.51	0.247	1.10978e-105		Elac2	3.53293e-14	0.139826	0.254	0.105	1.09708e-09		Ogfr	2.49666e-08	0.210989	0.528	0.228	0.000775287		Arrb2	8.17562e-53	0.272083	0.156	0.065	2.53878e-48		Fam92a	4.12718e-17	0.0922783	0.161	0.067	1.28161e-12		Msi2	5.02461e-08	0.28701	0.399	0.245	0.00156029
AC160336.1	9.58199e-110	0.369472	0.51	0.268	2.9755e-105		Cnn3	3.58873e-14	0.0965296	0.058	0.01	1.11441e-09		Morc2a	2.62486e-08	0.19626	0.303	0.108	0.000815098		Ebpl	9.6952e-53	0.264884	0.161	0.069	3.01065e-48		Sh2d1a	4.1744e-17	0.147598	0.621	0.382	1.29627e-12		Cisd1	5.31679e-08	0.219853	0.248	0.125	0.00165102
Urb1	1.18764e-109	0.199241	0.19	0.048	3.68799e-105		Gemin6	4.13652e-14	0.122555	0.169	0.058	1.28451e-09		Tsr2	2.7283e-08	0.169161	0.303	0.106	0.00084722		Wbp1	1.57351e-52	0.224959	0.115	0.036	4.88623e-48		Anapc4	4.81539e-17	0.0976854	0.151	0.061	1.49532e-12		Pfdn1	5.35574e-08	0.277184	0.408	0.259	0.00166312
Ppp2r2a	1.99772e-109	0.263297	0.564	0.29	6.2035e-105		Tex30	4.59587e-14	0.176407	0.346	0.162	1.42715e-09		Foxp4	2.73572e-08	0.250309	0.292	0.103	0.000849525		Atp6v1g1	1.86996e-52	0.327446	0.463	0.411	5.80679e-48		Micu2	5.11518e-17	0.110696	0.223	0.105	1.58842e-12		1810034E14Rik	5.41062e-08	0.0272187	0.028	0.004	0.00168016
Surf2	6.00298e-109	0.245008	0.34	0.137	1.86411e-104		Isyna1	4.66351e-14	0.181535	0.383	0.185	1.44816e-09		Pum3	2.73784e-08	0.284073	0.584	0.282	0.000850181		BC147527	2.08028e-52	0.236352	0.12	0.039	6.45988e-48		Kdelr1	5.17749e-17	0.135249	0.306	0.162	1.60777e-12		Ssna1	5.59296e-08	0.179975	0.33	0.176	0.00173678
Mafk	1.09375e-108	0.206248	0.219	0.064	3.39642e-104		Jagn1	5.22537e-14	0.184753	0.488	0.251	1.62263e-09		Stab2	2.73904e-08	0.109669	0.022	0.001	0.000850553		Klrc2	2.14495e-52	0.448477	0.176	0.08	6.6607e-48		Aifm1	6.6359e-17	0.107419	0.187	0.084	2.06065e-12		Ets1	5.72701e-08	0.193607	0.89	0.713	0.00177841
Mtdh	1.53885e-108	0.297883	0.816	0.536	4.7786e-104		Ddx18	5.25219e-14	0.225849	0.681	0.4	1.63096e-09		Cdc34	2.77157e-08	0.291447	0.494	0.217	0.000860657		Anxa6	3.16498e-52	0.318839	0.4	0.305	9.82822e-48		Ndufs4	6.9897e-17	0.2174	0.644	0.457	2.17051e-12		mt-Nd5	5.83691e-08	0.186795	0.913	0.89	0.00181253
Ppp2ca	1.54194e-108	0.291825	0.79	0.531	4.78818e-104		Tacc2	5.47292e-14	0.145785	0.173	0.061	1.6995e-09		Iars	2.77551e-08	0.257897	0.427	0.18	0.000861879		Bod1l	3.71585e-52	0.388105	0.432	0.355	1.15388e-47		2610524H06Rik	6.9943e-17	0.115097	0.143	0.058	2.17194e-12		Rsu1	5.9261e-08	0.159577	0.252	0.122	0.00184023
Endog	3.05303e-108	0.234042	0.291	0.106	9.48057e-104		Hacd1	5.50916e-14	0.0109124	0.01	0	1.71076e-09		Tbl1x	2.79505e-08	0.261886	0.64	0.317	0.000867946		Fam46a	4.02192e-52	0.360529	0.24	0.136	1.24893e-47		Cox4i1	7.27273e-17	0.142025	0.98	0.942	2.2584e-12		Gm45606	5.95538e-08	0.0800721	0.069	0.018	0.00184932
Rrp12	9.56451e-108	0.189525	0.158	0.033	2.97007e-103		Ube2n	5.93334e-14	0.226565	0.732	0.461	1.84248e-09		Aatf	2.81139e-08	0.27236	0.551	0.262	0.00087302		Sh3bp1	4.16525e-52	0.233991	0.137	0.051	1.29344e-47		Cutc	7.60203e-17	0.096275	0.135	0.053	2.36066e-12		Card11	6.13141e-08	0.200653	0.234	0.111	0.00190399
Ncs1	1.30355e-107	0.145613	0.099	0.008	4.04791e-103		Gmps	6.04256e-14	0.20766	0.576	0.321	1.8764e-09		Slc5a6	2.82473e-08	0.158025	0.202	0.058	0.000877164		Maf1	4.32637e-52	0.343539	0.242	0.145	1.34347e-47		Tia1	7.93234e-17	0.157227	0.359	0.201	2.46323e-12		Cenpx	6.23314e-08	0.251497	0.468	0.291	0.00193558
Arhgef3	1.89066e-107	0.329965	0.484	0.246	5.87107e-103		Sik1	6.32947e-14	0.12883	0.169	0.059	1.96549e-09		P4ha2	2.84314e-08	0.0295297	0.022	0.001	0.000882882		Ccm2	5.19562e-52	0.348928	0.283	0.186	1.6134e-47		Borcs8	7.96638e-17	0.128311	0.349	0.192	2.4738e-12		9530034E10Rik	6.4351e-08	0.0458203	0.032	0.005	0.00199829
Kars	9.41975e-107	0.240861	0.375	0.16	2.92511e-102		Mecr	6.33723e-14	0.106465	0.166	0.057	1.9679e-09		Dlk2	2.84314e-08	0.0291129	0.022	0.001	0.000882882		Ccndbp1	5.58552e-52	0.317537	0.223	0.124	1.73447e-47		Tecr	7.99425e-17	0.149763	0.625	0.401	2.48245e-12		Rufy1	6.5078e-08	0.127091	0.101	0.033	0.00202087
Lman2	9.62906e-107	0.288083	0.754	0.468	2.99011e-102		Ets2	6.61003e-14	0.140955	0.166	0.058	2.05261e-09		Med21	2.89693e-08	0.324812	0.674	0.365	0.000899585		Rnasel	6.19106e-52	0.275588	0.158	0.067	1.92251e-47		Rp9	8.42474e-17	0.15594	0.651	0.423	2.61613e-12		1600002K03Rik	6.5527e-08	0.162884	0.165	0.069	0.00203481
Pcgf5	1.48811e-106	0.268656	0.472	0.227	4.62103e-102		Tuba1b	8.58024e-14	0.223826	0.631	0.37	2.66442e-09		4430402I18Rik	2.91138e-08	0.0187229	0.022	0.001	0.000904072		Dctn2	7.96233e-52	0.326133	0.235	0.136	2.47254e-47		Ebpl	8.52026e-17	0.121713	0.229	0.109	2.6458e-12		Eml6	6.67607e-08	0.0235705	0.014	0.001	0.00207312
Srsf5	1.61026e-106	0.248905	0.928	0.727	5.00035e-102		Acot7	8.79037e-14	0.164467	0.414	0.204	2.72967e-09		Mrpl20	2.94481e-08	0.353163	0.854	0.534	0.000914452		Pigp	9.56498e-52	0.330434	0.258	0.158	2.97021e-47		Dtx1	8.70813e-17	0.16585	0.618	0.386	2.70414e-12		D730003K21Rik	6.75026e-08	0.0201836	0.014	0.001	0.00209616
Lsm2	1.61042e-106	0.265433	0.523	0.264	5.00083e-102		Dnajc11	8.91213e-14	0.167338	0.342	0.159	2.76748e-09		Dram1	3.02595e-08	0.0381552	0.045	0.004	0.000939648		Sc5d	1.28406e-51	0.282884	0.172	0.078	3.9874e-47		9030624J02Rik	8.86275e-17	0.101585	0.166	0.071	2.75215e-12		Hgsnat	7.10652e-08	0.166666	0.197	0.088	0.00220679
Aprt	4.92351e-106	0.30214	0.711	0.433	1.5289e-101		Hypk	9.08301e-14	0.174873	0.519	0.273	2.82055e-09		Btf3	3.12509e-08	0.24466	1	0.966	0.000970434		Cep164	1.53545e-51	0.235818	0.117	0.038	4.76803e-47		Snx4	9.05816e-17	0.132416	0.272	0.139	2.81283e-12		Pnrc2	7.23034e-08	0.19485	0.335	0.181	0.00224524
Asf1a	6.12421e-106	0.280426	0.349	0.147	1.90175e-101		Tarbp1	9.0992e-14	0.0946504	0.122	0.036	2.82558e-09		Wdr74	3.16753e-08	0.109632	0.191	0.052	0.000983613		AW011738	2.01031e-51	0.261335	0.144	0.057	6.24261e-47		Ganab	9.44802e-17	0.103246	0.255	0.126	2.93389e-12		Tshz1	7.41897e-08	0.166791	0.206	0.094	0.00230381
Naa20	7.31405e-106	0.261727	0.518	0.261	2.27123e-101		Dus4l	9.19802e-14	0.0744899	0.102	0.027	2.85626e-09		Exosc1	3.24904e-08	0.230704	0.438	0.181	0.00100892		Ppp1r9b	2.02594e-51	0.331969	0.226	0.128	6.29115e-47		Prkd2	9.49763e-17	0.0955531	0.218	0.1	2.9493e-12		Kdm5a	7.42629e-08	0.257349	0.477	0.3	0.00230609
Ubfd1	8.39387e-106	0.228961	0.339	0.136	2.60655e-101		Timm44	9.41434e-14	0.154739	0.356	0.165	2.92344e-09		Nmd3	3.24972e-08	0.318036	0.539	0.269	0.00100914		Lrrk1	2.36267e-51	0.159226	0.066	0.008	7.33681e-47		Smyd4	1.03655e-16	0.0734054	0.066	0.018	3.21881e-12		Smim4	7.44149e-08	0.16038	0.22	0.102	0.00231081
Gm12840	1.06322e-105	0.490055	0.268	0.102	3.30161e-101		Cbfb	9.58968e-14	0.22876	0.563	0.317	2.97788e-09		Pdap1	3.2788e-08	0.315563	0.685	0.374	0.00101817		Trmt1l	2.3791e-51	0.311167	0.187	0.093	7.38782e-47		Eif4ebp2	1.06226e-16	0.17279	0.432	0.262	3.29865e-12		Uhrf1bp1l	7.49434e-08	0.208098	0.326	0.181	0.00232722
Elavl1	1.65312e-105	0.263941	0.631	0.345	5.13344e-101		Rps7	9.85696e-14	0.128499	1	1	3.06088e-09		Vma21-ps	3.44697e-08	0.0340936	0.034	0.003	0.00107039		Sirt7	2.51801e-51	0.354559	0.335	0.246	7.81916e-47		Cab39l	1.12394e-16	0.134001	0.172	0.076	3.49018e-12		Rab37	7.64476e-08	0.160522	0.394	0.216	0.00237393
Nup54	2.18433e-105	0.232983	0.328	0.132	6.783e-101		Atf4	9.86665e-14	0.254591	0.746	0.468	3.06389e-09		Mrrf	3.49916e-08	0.15268	0.225	0.068	0.00108659		Ggct	2.5661e-51	0.285202	0.163	0.073	7.96851e-47		Eml3	1.12423e-16	0.0909231	0.101	0.035	3.49106e-12		Rps29	7.72046e-08	0.119649	1	0.998	0.00239743
Tgif2	3.07975e-105	0.184298	0.18	0.045	9.56354e-101		Farsb	1.04359e-13	0.1518	0.359	0.168	3.24066e-09		Dnttip2	3.51719e-08	0.354418	0.809	0.468	0.00109219		Klf6	2.60984e-51	0.326478	0.279	0.173	8.10434e-47		mt-Nd1	1.15652e-16	0.121787	0.998	0.996	3.59135e-12		Adcy7	7.76248e-08	0.198737	0.514	0.303	0.00241048
Tm2d3	3.15447e-105	0.255882	0.442	0.208	9.79556e-101		Riok2	1.04575e-13	0.133627	0.298	0.131	3.24737e-09		Cd82	3.54587e-08	0.304659	0.989	0.733	0.0011011		Abhd16a	2.69484e-51	0.301716	0.193	0.097	8.36827e-47		Glo1	1.16421e-16	0.147322	0.332	0.185	3.61522e-12		Etv6	8.00433e-08	0.19812	0.216	0.104	0.00248558
Ddx56	5.87068e-105	0.21415	0.271	0.096	1.82302e-100		Gng5	1.0706e-13	0.2384	0.929	0.78	3.32453e-09		Csf2	3.6022e-08	0.211686	0.517	0.248	0.00111859		Pcmtd2	3.05829e-51	0.213574	0.104	0.029	9.4969e-47		Apool	1.18197e-16	0.10432	0.146	0.06	3.67039e-12		Rps6ka2	8.17234e-08	0.0539872	0.028	0.004	0.00253776
Cyb5b	1.53201e-104	0.250523	0.483	0.234	4.75736e-100		Gmppb	1.0731e-13	0.135077	0.288	0.125	3.33229e-09		mt-Cytb	3.69825e-08	0.170679	1	1	0.00114842		Rgs14	3.29065e-51	0.23642	0.125	0.043	1.02185e-46		Ptpra	1.21669e-16	0.132557	0.287	0.149	3.77818e-12		Lgals4	8.27871e-08	0.0455534	0.028	0.004	0.00257079
Pdap1	1.95054e-104	0.272794	0.544	0.287	6.05702e-100		Prps1	1.2114e-13	0.174773	0.373	0.18	3.76176e-09		Rab34	3.79003e-08	0.0530754	0.056	0.007	0.00117692		Tmem71	3.82888e-51	0.235879	0.126	0.044	1.18898e-46		Rtf1	1.2916e-16	0.17627	0.605	0.41	4.01082e-12		Uqcc3	8.44158e-08	0.232573	0.413	0.243	0.00262136
Txndc5	3.80443e-104	0.217289	0.29	0.106	1.18139e-99		Mrpl43	1.22105e-13	0.21686	0.705	0.418	3.79172e-09		Utp20	3.81979e-08	0.226073	0.371	0.147	0.00118616		mt-Nd5	7.86104e-51	0.199044	0.87	0.914	2.44109e-46		Hes6	1.3084e-16	0.101125	0.21	0.098	4.06298e-12		Gipc1	8.48335e-08	0.107599	0.147	0.057	0.00263434
Slc4a7	8.20955e-104	0.233015	0.335	0.135	2.54931e-99		Tet3	1.22741e-13	0.182217	0.376	0.181	3.81147e-09		Knop1	3.96612e-08	0.307658	0.629	0.326	0.0012316		Eci2	7.9938e-51	0.247447	0.146	0.059	2.48232e-46		Glipr1	1.32916e-16	0.131559	0.359	0.198	4.12744e-12		Marf1	8.50056e-08	0.183395	0.271	0.136	0.00263968
Lrpprc	9.20139e-104	0.201302	0.256	0.086	2.85731e-99		Rbmxl1	1.26473e-13	0.217509	0.559	0.311	3.92736e-09		Canx	4.41052e-08	0.347199	0.843	0.518	0.0013696		Spin2c	8.31097e-51	0.223233	0.114	0.036	2.58081e-46		Tnik	1.36204e-16	0.141485	0.373	0.209	4.22956e-12		Rps6ka3	8.90427e-08	0.248897	0.417	0.262	0.00276504
Gm44851	1.46179e-103	0.130311	0.08	0.003	4.53931e-99		Fastkd1	1.26949e-13	0.0958945	0.122	0.036	3.94213e-09		Gch1	4.41949e-08	0.283821	0.539	0.255	0.00137238		Cox20	1.27115e-50	0.318911	0.238	0.139	3.9473e-46		Coro7	1.36486e-16	0.105207	0.169	0.073	4.2383e-12		Gsk3b	9.00898e-08	0.184828	0.417	0.241	0.00279756
Gadd45gip1	1.93049e-103	0.276705	0.591	0.323	5.99474e-99		Chordc1	1.37051e-13	0.243264	0.6	0.357	4.25584e-09		Itga3	4.42276e-08	0.0515958	0.045	0.004	0.0013734		Kdm5a	1.36723e-50	0.372218	0.345	0.259	4.24565e-46		Gm10076	1.39768e-16	0.209875	0.664	0.48	4.3402e-12		Klf13	9.19096e-08	0.240468	0.505	0.334	0.00285407
Cdc34	2.51457e-103	0.221361	0.353	0.148	7.80851e-99		Bag5	1.3713e-13	0.200718	0.454	0.237	4.2583e-09		Thop1	4.43314e-08	0.150856	0.225	0.07	0.00137662		Ssu72	1.37105e-50	0.336172	0.449	0.391	4.25754e-46		Armc3	1.51133e-16	0.0748995	0.086	0.027	4.69314e-12		Dennd1c	9.81532e-08	0.187094	0.266	0.133	0.00304795
Ubap2	5.01115e-103	0.220467	0.287	0.108	1.55611e-98		Far1	1.39584e-13	0.173815	0.292	0.131	4.33451e-09		Mdfic	4.43977e-08	0.324235	0.427	0.191	0.00137868		Zfp831	1.40898e-50	0.231211	0.116	0.038	4.37531e-46		Ppp2r5c	1.55096e-16	0.144379	0.384	0.218	4.8162e-12		Arid5a	1.00652e-07	0.177512	0.239	0.115	0.00312555
Vkorc1l1	8.1828e-103	0.188562	0.187	0.05	2.54101e-98		Tbl3	1.39941e-13	0.147968	0.319	0.144	4.34559e-09		Armc6	4.6932e-08	0.0930657	0.112	0.023	0.00145738		Cbr1	1.43714e-50	0.275402	0.166	0.076	4.46276e-46		Fuca1	1.62304e-16	0.12038	0.304	0.159	5.04003e-12		Dcps	1.01933e-07	0.178913	0.271	0.138	0.00316533
Pum1	9.61169e-103	0.26501	0.52	0.266	2.98472e-98		Ahi1	1.43694e-13	0.0982923	0.149	0.049	4.46214e-09		Naca	5.00971e-08	0.206831	1	0.985	0.00155567		Tor2a	1.77673e-50	0.288081	0.191	0.095	5.51727e-46		Itgb3	1.65519e-16	0.138453	0.243	0.121	5.13985e-12		Gstp3	1.01969e-07	0.172652	0.133	0.051	0.00316644
Dhx33	1.09443e-102	0.190373	0.175	0.044	3.39854e-98		Hdlbp	1.48224e-13	0.207719	0.559	0.313	4.60281e-09		Tnfrsf25	5.04845e-08	0.30998	0.719	0.386	0.0015677		Mbd2	2.01105e-50	0.328391	0.473	0.42	6.24492e-46		Hsd17b4	1.66086e-16	0.123536	0.206	0.097	5.15748e-12		Tspan31	1.02618e-07	0.130033	0.128	0.048	0.0031866
Eloc	1.54717e-102	0.264547	0.689	0.393	4.80441e-98		Timm8b	1.51514e-13	0.216587	0.563	0.314	4.70497e-09		Ahctf1	5.09164e-08	0.248295	0.551	0.247	0.00158111		Abcb9	2.21646e-50	0.327612	0.285	0.185	6.88277e-46		Mthfd2l	1.6635e-16	0.0658443	0.054	0.013	5.16565e-12		Mcee	1.0597e-07	0.106146	0.142	0.055	0.00329069
Eif5	2.06193e-102	0.27655	0.912	0.727	6.4029e-98		Hars	1.52419e-13	0.173986	0.42	0.212	4.73306e-09		Gemin6	5.11703e-08	0.178701	0.202	0.06	0.00158899		Zbtb7b	3.19639e-50	0.271767	0.155	0.066	9.92574e-46		Cdpf1	1.74704e-16	0.110696	0.184	0.083	5.42509e-12		Mbd2	1.06177e-07	0.252634	0.615	0.444	0.00329713
Snhg6	3.09037e-102	0.20869	0.305	0.118	9.59652e-98		Smn1	1.61589e-13	0.179407	0.42	0.213	5.01784e-09		Gabarapl1	5.19005e-08	0.0800022	0.079	0.012	0.00161167		Zer1	4.14072e-50	0.215156	0.107	0.032	1.28582e-45		Bscl2	1.79376e-16	0.110195	0.283	0.144	5.57017e-12		Rfc1	1.07232e-07	0.14785	0.225	0.105	0.00332987
Cdk4	3.2727e-102	0.278895	0.643	0.366	1.01627e-97		Gbp5	1.66266e-13	0.178428	0.2	0.077	5.16306e-09		Ube2f	5.49835e-08	0.222809	0.562	0.256	0.0017074		Fam117a	4.4908e-50	0.25919	0.138	0.053	1.39453e-45		Rab37	1.85238e-16	0.104455	0.384	0.209	5.7522e-12		Cnot6	1.07863e-07	0.191096	0.298	0.16	0.00334946
Zfp330	3.98827e-102	0.240243	0.393	0.175	1.23848e-97		Etv6	1.71305e-13	0.176343	0.244	0.103	5.31954e-09		Utp23	5.5575e-08	0.307034	0.472	0.22	0.00172577		Cwf19l2	5.26112e-50	0.314327	0.207	0.111	1.63374e-45		Snx14	2.04504e-16	0.100067	0.154	0.064	6.35047e-12		Itga6	1.08978e-07	0.118096	0.092	0.029	0.0033841
Lrmp	4.14924e-102	0.333403	0.486	0.257	1.28846e-97		Crtap	1.71615e-13	0.091859	0.132	0.041	5.32917e-09		Rpl31	5.61489e-08	0.286708	0.989	0.832	0.00174359		Cd200r4	5.34104e-50	0.148601	0.058	0.005	1.65855e-45		Elf1	2.05804e-16	0.165345	0.673	0.461	6.39082e-12		Gm49077	1.09858e-07	0.0457988	0.023	0.003	0.00341143
Junb	5.21148e-102	0.369008	0.941	0.802	1.61832e-97		Rara	1.74524e-13	0.114599	0.2	0.076	5.41948e-09		Cct4	5.75477e-08	0.321761	0.899	0.658	0.00178703		Cnr2	5.48351e-50	0.198984	0.092	0.023	1.70279e-45		Vpreb1	2.19228e-16	0.026419	0.023	0.002	6.8077e-12		Prdx2	1.11005e-07	0.210894	0.656	0.471	0.00344705
Pom121	5.74745e-102	0.215308	0.339	0.138	1.78476e-97		Ddx10	1.91795e-13	0.226648	0.634	0.376	5.9558e-09		Tmem147	5.95355e-08	0.266999	0.573	0.273	0.00184876		Evi2a	1.03316e-49	0.258447	0.155	0.066	3.20826e-45		Fam103a1	2.21427e-16	0.149525	0.424	0.251	6.87596e-12		AI504432	1.11431e-07	0.227617	0.312	0.172	0.00346026
Ywhag	9.48344e-102	0.239082	0.419	0.194	2.94489e-97		Skil	1.93218e-13	0.243419	0.315	0.151	5.99999e-09		Ar	6.32681e-08	0.119501	0.112	0.023	0.00196466		Tnfsf10	1.18465e-49	0.27953	0.173	0.08	3.67869e-45		Sytl1	2.26347e-16	0.0808901	0.109	0.039	7.02877e-12		Pkib	1.12265e-07	0.0270446	0.023	0.003	0.00348617
Mrpl16	1.04899e-101	0.234103	0.365	0.158	3.25742e-97		Calr	1.93301e-13	0.219916	0.959	0.851	6.00258e-09		Zc3h18	6.86957e-08	0.250389	0.517	0.241	0.00213321		Fbxl20	3.8772e-49	0.215073	0.107	0.033	1.20399e-44		Setx	2.3913e-16	0.0977767	0.315	0.166	7.4257e-12		Evi5	1.12882e-07	0.0627098	0.041	0.008	0.00350534
Nomo1	1.57318e-101	0.19414	0.211	0.064	4.8852e-97		Qtrt1	2.00662e-13	0.142794	0.247	0.104	6.23116e-09		Riox1	6.92898e-08	0.198151	0.528	0.233	0.00215166		Cyb5a	4.0011e-49	0.285644	0.276	0.173	1.24246e-44		Cebpzos	2.42338e-16	0.0996024	0.247	0.121	7.52531e-12		Sema6c	1.13795e-07	0.0409465	0.023	0.003	0.00353369
Sf3b3	1.96237e-101	0.260833	0.652	0.367	6.09376e-97		Rrp1	2.07821e-13	0.245627	0.786	0.531	6.45347e-09		Tpbgl	7.05823e-08	0.0563325	0.056	0.007	0.00219179		Trappc1	5.66913e-49	0.274471	0.17	0.08	1.76044e-44		Cdc42se1	2.50594e-16	0.197118	0.475	0.301	7.78169e-12		Letm2	1.16587e-07	0.135408	0.165	0.068	0.00362037
Timm8b	2.93442e-101	0.249703	0.48	0.236	9.11226e-97		Memo1	2.12074e-13	0.169233	0.315	0.147	6.58555e-09		Smarca4	7.11002e-08	0.281618	0.562	0.269	0.00220787		Crtc3	6.94539e-49	0.33246	0.287	0.192	2.15675e-44		Ngly1	2.55326e-16	0.11867	0.233	0.114	7.92864e-12		Ankrd6	1.16787e-07	0.120186	0.046	0.009	0.00362658
1810032O08Rik	6.19228e-101	0.209741	0.219	0.069	1.92289e-96		Hist1h3c	2.15342e-13	0.0182195	0.014	0.001	6.68701e-09		Brix1	7.15961e-08	0.262055	0.708	0.356	0.00222328		Glmp	9.92933e-49	0.296204	0.215	0.12	3.08335e-44		Trim12a	2.67246e-16	0.129846	0.49	0.283	8.2988e-12		Sugt1	1.17919e-07	0.27125	0.5	0.332	0.00366174
Fosl1	7.72308e-101	0.129072	0.087	0.006	2.39825e-96		Ubap2l	2.19144e-13	0.184655	0.668	0.388	6.80507e-09		Ctss	7.61902e-08	0.16692	0.315	0.114	0.00236593		Vamp5	1.12009e-48	0.248483	0.143	0.058	3.47821e-44		Sh2d3c	2.70451e-16	0.0948073	0.307	0.157	8.39832e-12		Hint2	1.19048e-07	0.161036	0.298	0.153	0.00369681
Otud4	8.40927e-101	0.240929	0.383	0.171	2.61133e-96		Cfdp1	2.41612e-13	0.196701	0.641	0.357	7.50277e-09		Nup62	7.75344e-08	0.192158	0.36	0.14	0.00240767		B4galnt1	1.14391e-48	0.240623	0.648	0.612	3.55218e-44		Tmem160	2.71095e-16	0.168462	0.644	0.445	8.4183e-12		Klk8	1.21425e-07	0.265259	0.601	0.442	0.00377061
Cmss1	8.98752e-101	0.195894	0.213	0.065	2.79089e-96		Eif2b5	2.43533e-13	0.188397	0.329	0.156	7.56243e-09		Taf1d	7.8757e-08	0.279439	0.73	0.402	0.00244564		Khnyn	1.21115e-48	0.252972	0.14	0.057	3.76098e-44		Taf1b	2.75279e-16	0.103492	0.171	0.075	8.54824e-12		Ccnd3	1.21619e-07	0.222537	0.679	0.471	0.00377662
Srprb	1.07302e-100	0.193191	0.228	0.073	3.33206e-96		Ddx1	2.56836e-13	0.170114	0.366	0.179	7.97554e-09		Metap1	7.87775e-08	0.204718	0.371	0.149	0.00244628		Card6	1.40673e-48	0.195854	0.09	0.022	4.36831e-44		Fam53b	2.81997e-16	0.107213	0.395	0.219	8.75685e-12		Tceanc2	1.22055e-07	0.112836	0.119	0.043	0.00379018
Psmc4	1.23207e-100	0.264523	0.614	0.342	3.82594e-96		Crls1	2.66935e-13	0.121171	0.275	0.118	8.28912e-09		Pcbp1	7.91862e-08	0.336187	0.91	0.623	0.00245897		Soat2	1.73623e-48	0.163715	0.068	0.01	5.39153e-44		Ptprf	2.82721e-16	0.0275659	0.018	0.002	8.77935e-12		Slc12a7	1.26006e-07	0.146479	0.151	0.061	0.00391285
Rangrf	1.89685e-100	0.182637	0.161	0.038	5.89029e-96		Hmgcr	2.7178e-13	0.179159	0.353	0.171	8.43958e-09		Srsf3	8.20947e-08	0.275686	0.978	0.823	0.00254929		Usf1	1.84914e-48	0.257521	0.152	0.066	5.74212e-44		Smc6	2.89003e-16	0.157152	0.493	0.302	8.97442e-12		Il12rb1	1.27581e-07	0.196517	0.266	0.139	0.00396178
Rrp8	3.08712e-100	0.202312	0.26	0.093	9.58643e-96		Wsb2	2.73537e-13	0.124917	0.346	0.16	8.49415e-09		Agpat4	8.29671e-08	0.146679	0.146	0.037	0.00257638		Galnt10	1.87556e-48	0.226111	0.116	0.04	5.82418e-44		Atp6v0e	2.90654e-16	0.169079	0.84	0.674	9.02566e-12		Smarca2	1.29267e-07	0.174596	0.275	0.141	0.00401414
Cks1b	3.77416e-100	0.189972	0.205	0.061	1.17199e-95		Pebp1	2.87729e-13	0.255143	0.881	0.642	8.93485e-09		Chordc1	8.46547e-08	0.256233	0.719	0.361	0.00262878		Taf6l	2.78258e-48	0.326613	0.288	0.193	8.64075e-44		Lmf1	3.24999e-16	0.0639259	0.072	0.021	1.00922e-11		Mkl2	1.30175e-07	0.0851132	0.073	0.02	0.00404233
Skil	4.97069e-100	0.220826	0.267	0.096	1.54355e-95		Cops5	2.94526e-13	0.167927	0.508	0.268	9.14592e-09		Bspry	8.709e-08	0.155844	0.18	0.051	0.00270441		Pigyl	3.15112e-48	0.247981	0.14	0.057	9.78518e-44		Sord	3.29847e-16	0.0379809	0.037	0.006	1.02428e-11		Zfp128	1.33971e-07	0.0446781	0.028	0.004	0.0041602
Adsl	7.84208e-100	0.212262	0.301	0.118	2.4352e-95		Clpp	2.97331e-13	0.166056	0.414	0.207	9.23302e-09		Soat1	9.03033e-08	0.153377	0.247	0.081	0.00280419		Znrf2	5.30778e-48	0.345811	0.295	0.205	1.64823e-43		Leprotl1	3.35701e-16	0.152013	0.72	0.517	1.04245e-11		Pacs1	1.36924e-07	0.159004	0.183	0.081	0.0042519
Prpf31	9.82383e-100	0.236958	0.423	0.197	3.05059e-95		1810055G02Rik	3.05515e-13	0.0728385	0.068	0.014	9.48714e-09		Frmd4b	9.09881e-08	0.270088	0.258	0.087	0.00282545		Csk	6.50348e-48	0.319179	0.443	0.375	2.01952e-43		Ube2c	3.47198e-16	0.0256668	0.02	0.002	1.07816e-11		Bbs4	1.37745e-07	0.0822454	0.055	0.013	0.00427739
Qtrt1	1.49904e-99	0.196555	0.2	0.059	4.65497e-95		BC003965	3.06716e-13	0.152932	0.512	0.266	9.52445e-09		Mrpl36	9.12091e-08	0.28022	0.629	0.32	0.00283232		Mbp	6.78098e-48	0.338178	0.388	0.311	2.1057e-43		BC147527	3.62302e-16	0.0892314	0.174	0.075	1.12506e-11		Rab27a	1.42434e-07	0.213488	0.257	0.133	0.004423
Morc2a	1.51719e-99	0.192285	0.203	0.059	4.71133e-95		Icos	3.08684e-13	0.389405	0.739	0.534	9.58555e-09		Mrps7	9.16104e-08	0.239435	0.584	0.277	0.00284478		Anapc11	8.86641e-48	0.320338	0.233	0.138	2.75329e-43		Sugt1	3.86664e-16	0.199564	0.501	0.324	1.20071e-11		Slc25a23	1.4258e-07	0.115429	0.106	0.036	0.00442752
Btg1	3.22988e-99	0.371268	0.979	0.94	1.00298e-94		Arf4	3.12475e-13	0.277103	0.868	0.654	9.70327e-09		Noa1	9.35989e-08	0.19855	0.416	0.169	0.00290653		Mrpl14	9.60607e-48	0.301992	0.258	0.163	2.98297e-43		H2afv	4.14985e-16	0.164555	0.604	0.381	1.28865e-11		Supt20	1.47011e-07	0.172909	0.344	0.185	0.00456513
Psmd7	3.91869e-99	0.285669	0.664	0.393	1.21687e-94		Cd320	3.13956e-13	0.130441	0.261	0.112	9.74927e-09		Mrpl50	9.66328e-08	0.25032	0.494	0.227	0.00300074		Itpr3	1.34979e-47	0.244256	0.125	0.046	4.19151e-43		Ap1s1	4.51638e-16	0.0969298	0.215	0.102	1.40247e-11		Tst	1.47666e-07	0.0967701	0.069	0.019	0.00458546
Gpr18	8.87528e-99	0.34815	0.374	0.173	2.75604e-94		Foxn2	3.23593e-13	0.162564	0.414	0.204	1.00485e-08		Hipk2	9.92153e-08	0.134247	0.236	0.076	0.00308093		Acss2	1.74525e-47	0.198737	0.1	0.029	5.41953e-43		Ptges	4.74781e-16	0.020553	0.011	0	1.47434e-11		Acat1	1.51742e-07	0.244725	0.349	0.199	0.00471204
Zfp106	1.03568e-98	0.230612	0.397	0.179	3.21611e-94		Pus7l	3.43859e-13	0.12044	0.169	0.061	1.06778e-08		Rock2	1.02443e-07	0.259626	0.539	0.253	0.00318115		Flt3l	1.8281e-47	0.237983	0.141	0.057	5.67679e-43		Xkrx	4.82315e-16	0.0594872	0.043	0.009	1.49773e-11		Ebp	1.54803e-07	0.197239	0.39	0.231	0.00480708
Rraga	1.49241e-98	0.237364	0.422	0.198	4.63439e-94		Magoh	3.56039e-13	0.210913	0.888	0.624	1.10561e-08		Insm1	1.02597e-07	0.0201912	0.022	0.001	0.00318593		Dzip1	2.12372e-47	0.210528	0.104	0.032	6.59479e-43		Gm26551	4.94772e-16	0.0709095	0.052	0.012	1.53642e-11		Thap3	1.56007e-07	0.162677	0.248	0.121	0.00484448
Aebp2	1.61284e-98	0.260323	0.569	0.306	5.00834e-94		Selenoi	3.70332e-13	0.148969	0.359	0.173	1.14999e-08		Gas2l1	1.03243e-07	0.0258522	0.022	0.001	0.003206		Ripor2	2.48455e-47	0.27006	0.185	0.09	7.71528e-43		Inpp1	5.15448e-16	0.111092	0.264	0.133	1.60062e-11		Ndufs4	1.56813e-07	0.235376	0.642	0.465	0.0048695
Suv39h2	1.65238e-98	0.141759	0.101	0.012	5.13113e-94		Ung	3.70548e-13	0.180277	0.336	0.16	1.15066e-08		Metap2	1.04831e-07	0.285506	0.809	0.437	0.00325532		Gng2	2.76285e-47	0.313402	0.234	0.139	8.57947e-43		Tcrg-C2	5.37306e-16	0.24446	0.276	0.152	1.6685e-11		Rftn1	1.57413e-07	0.213239	0.344	0.197	0.00488814
Tbrg4	1.76123e-98	0.186703	0.192	0.055	5.46916e-94		Rpl36al	3.71209e-13	0.235258	0.854	0.605	1.15271e-08		Polr2l	1.05132e-07	0.167713	0.303	0.11	0.00326466		Tmco1	4.90539e-47	0.306989	0.239	0.145	1.52327e-42		Ccdc126	5.53315e-16	0.0631799	0.065	0.017	1.71821e-11		Pcmtd2	1.57606e-07	0.144449	0.161	0.067	0.00489413
Ehd4	2.13549e-98	0.174634	0.146	0.031	6.63134e-94		Pprc1	3.81246e-13	0.155447	0.298	0.136	1.18388e-08		Gorasp2	1.07043e-07	0.201917	0.404	0.167	0.003324		Myo6	5.24123e-47	0.258228	0.13	0.05	1.62756e-42		Itpr1	5.6512e-16	0.113989	0.198	0.094	1.75487e-11		Tktl1	1.58438e-07	0.103338	0.069	0.018	0.00491998
Pogk	7.31451e-98	0.175948	0.203	0.06	2.27138e-93		Rpl18	4.31084e-13	0.105932	1	1	1.33864e-08		Dimt1	1.08757e-07	0.222999	0.472	0.208	0.00337722		Herc6	1.047e-46	0.263246	0.167	0.078	3.25124e-42		Vrk3	5.76569e-16	0.0911999	0.246	0.12	1.79042e-11		Sigirr	1.58897e-07	0.150595	0.179	0.077	0.00493423
Gsdme	1.27376e-97	0.184186	0.189	0.053	3.95542e-93		Dhx15	4.40523e-13	0.194584	0.685	0.392	1.36796e-08		Wdr55	1.08797e-07	0.24503	0.393	0.167	0.00337848		Ncf4	1.08979e-46	0.289113	0.243	0.146	3.38413e-42		Mta3	5.76665e-16	0.0938775	0.183	0.082	1.79072e-11		Pou5f2	1.61227e-07	0.109922	0.11	0.038	0.00500659
Fam107b	1.61511e-97	0.426508	0.684	0.451	5.01539e-93		Egr2	4.49955e-13	0.169884	0.39	0.197	1.39725e-08		Isg20	1.09583e-07	0.13462	0.225	0.07	0.00340288		Cbx7	1.38564e-46	0.279476	0.171	0.084	4.30282e-42		Glmp	5.7693e-16	0.116061	0.304	0.16	1.79154e-11		Chp1	1.63977e-07	0.124571	0.17	0.072	0.00509198
Comtd1	3.9596e-97	0.199945	0.227	0.075	1.22958e-92		Pphln1	4.62001e-13	0.134559	0.275	0.121	1.43465e-08		Lrrc42	1.10616e-07	0.167333	0.213	0.067	0.00343497		Grk2	1.84939e-46	0.341981	0.297	0.209	5.74291e-42		Mrpl34	5.86326e-16	0.165447	0.449	0.276	1.82072e-11		Cotl1	1.67976e-07	0.202043	0.752	0.549	0.00521615
Thumpd1	4.17236e-97	0.236876	0.419	0.197	1.29564e-92		Zbtb17	4.77402e-13	0.0811733	0.119	0.035	1.48248e-08		Vapa	1.11805e-07	0.344427	0.865	0.563	0.00347187		Cep192	3.82899e-46	0.290323	0.182	0.093	1.18901e-41		Arrb2	5.97783e-16	0.0959875	0.221	0.105	1.85629e-11		Eloa	1.72595e-07	0.261982	0.321	0.186	0.0053596
Klf16	4.71594e-97	0.175611	0.165	0.04	1.46444e-92		Nol9	4.77571e-13	0.151407	0.312	0.143	1.483e-08		Gm15558	1.19009e-07	0.0375891	0.034	0.003	0.00369558		Wbp2	3.83847e-46	0.295102	0.202	0.111	1.19196e-41		Helz	6.19518e-16	0.111833	0.309	0.163	1.92379e-11		Mapk14	1.7319e-07	0.199731	0.197	0.092	0.00537808
Ptbp1	5.6885e-97	0.246368	0.513	0.266	1.76645e-92		Pvt1	4.8257e-13	0.157137	0.288	0.132	1.49853e-08		Bsg	1.22343e-07	0.320907	0.809	0.472	0.00379913		Mob3a	6.54869e-46	0.272531	0.177	0.089	2.03357e-41		Taf12	6.4662e-16	0.150753	0.321	0.18	2.00795e-11		Paox	1.78769e-07	0.110007	0.073	0.021	0.0055513
Pcgf6	9.86981e-97	0.18026	0.184	0.051	3.06487e-92		Dhx37	4.94463e-13	0.0934221	0.136	0.044	1.53546e-08		Sik1	1.23688e-07	0.136645	0.202	0.061	0.00384087		Fam26f	7.14616e-46	0.218506	0.115	0.04	2.2191e-41		Lmbr1l	6.54317e-16	0.099679	0.134	0.054	2.03185e-11		Trappc1	1.81423e-07	0.178242	0.248	0.124	0.00563372
Supt16	1.17524e-96	0.265515	0.61	0.342	3.64948e-92		Ltb	4.94869e-13	0.410048	0.963	0.881	1.53672e-08		Nfkb2	1.24037e-07	0.255972	0.528	0.252	0.00385172		Gcc2	7.20279e-46	0.332819	0.226	0.133	2.23668e-41		Elk3	6.56826e-16	0.0829468	0.161	0.069	2.03964e-11		Cep162	1.81807e-07	0.114319	0.124	0.046	0.00564565
Wdr4	1.26647e-96	0.17872	0.177	0.048	3.93277e-92		Sdf2l1	5.12567e-13	0.235784	0.342	0.17	1.59168e-08		Arhgap21	1.30421e-07	0.0491973	0.045	0.005	0.00404996		Arid4a	7.31965e-46	0.351265	0.359	0.277	2.27297e-41		Psmb10	6.89866e-16	0.173988	0.754	0.546	2.14224e-11		Abhd18	1.82642e-07	0.144567	0.128	0.049	0.00567157
Rpp14	1.69455e-96	0.204983	0.305	0.122	5.26207e-92		Gm10053	5.21579e-13	0.0811716	0.122	0.037	1.61966e-08		Fam136a	1.45377e-07	0.167432	0.416	0.169	0.00451438		Bex3	8.70067e-46	0.309454	0.236	0.145	2.70182e-41		Cldn10	7.03592e-16	0.0726856	0.049	0.011	2.18486e-11		Pbld1	1.84539e-07	0.0251657	0.009	0	0.00573049
Sec61a1	9.5884e-96	0.260563	0.493	0.251	2.97749e-91		Gps1	5.41803e-13	0.196445	0.495	0.258	1.68246e-08		Qtrt1	1.48859e-07	0.180129	0.292	0.107	0.00462251		Ugcg	9.20307e-46	0.330438	0.457	0.4	2.85783e-41		Rps21	7.0719e-16	0.113437	1	0.998	2.19604e-11		Gm49024	1.85659e-07	0.0166315	0.009	0	0.00576526
Vdac2	1.41812e-95	0.277235	0.803	0.537	4.40368e-91		Tspan4	5.43736e-13	0.0536623	0.054	0.01	1.68846e-08		Cd320	1.50562e-07	0.209532	0.303	0.114	0.00467541		Cap1	1.58433e-45	0.333502	0.392	0.32	4.91982e-41		Ralbp1	7.38335e-16	0.110612	0.433	0.252	2.29275e-11		Gm15728	1.85659e-07	0.0140747	0.009	0	0.00576526
Hbegf	2.23397e-95	0.252031	0.206	0.065	6.93713e-91		Vmp1	5.6751e-13	0.193041	0.556	0.307	1.76229e-08		Rps2	1.53228e-07	0.182166	1	0.998	0.00475818		Fam32a	2.02837e-45	0.350668	0.402	0.35	6.29871e-41		Ppp6r2	7.54739e-16	0.0757997	0.103	0.036	2.34369e-11		Mynn	1.88142e-07	0.162845	0.179	0.08	0.00584237
H13	2.38372e-95	0.24635	0.569	0.308	7.40217e-91		Ube2s	5.75414e-13	0.249752	0.841	0.584	1.78683e-08		Cdr2	1.57815e-07	0.120254	0.157	0.042	0.00490063		Rps18	2.08698e-45	0.0816065	1	1	6.4807e-41		Gatsl3	7.63034e-16	0.0859177	0.091	0.03	2.36945e-11		Gm32369	1.88486e-07	0.0156218	0.009	0	0.00585306
Cblb	4.68547e-95	0.279738	0.453	0.226	1.45498e-90		Bcl2l1	5.85773e-13	0.199181	0.38	0.191	1.819e-08		Ubxn2a	1.58479e-07	0.401439	0.472	0.238	0.00492124		Slc28a2	2.48966e-45	0.250364	0.142	0.061	7.73114e-41		Gtpbp2	7.84149e-16	0.1114	0.35	0.189	2.43502e-11		Tas1r3	1.88486e-07	0.0154974	0.009	0	0.00585306
Ksr1	6.64627e-95	0.194611	0.229	0.077	2.06387e-90		Erap1	6.21269e-13	0.155387	0.502	0.263	1.92923e-08		Pfdn2	1.61332e-07	0.28191	0.91	0.655	0.00500983		Lgals9	2.49858e-45	0.273935	0.176	0.089	7.75885e-41		Tusc3	8.9193e-16	0.142946	0.283	0.152	2.76971e-11		Dnajc3	1.89531e-07	0.210613	0.766	0.586	0.00588551
Clpp	7.15112e-95	0.212492	0.34	0.145	2.22064e-90		Slc31a1	6.37367e-13	0.0857805	0.153	0.052	1.97921e-08		Crls1	1.62693e-07	0.205111	0.315	0.121	0.0050521		A630023P12Rik	3.08744e-45	0.19794	0.095	0.027	9.58743e-41		Uqcrh	8.98438e-16	0.145029	0.968	0.899	2.78992e-11		Map4k2	1.89757e-07	0.162125	0.243	0.12	0.00589252
Rbm17	8.73859e-95	0.247192	0.51	0.265	2.7136e-90		Arhgap5	6.4031e-13	0.141462	0.214	0.085	1.98835e-08		Atp5g1	1.6364e-07	0.309268	0.888	0.69	0.00508153		Ppt1	3.72867e-45	0.296078	0.211	0.121	1.15786e-40		Atf7ip	9.0922e-16	0.134705	0.455	0.265	2.8234e-11		Ndufa3	1.95459e-07	0.20375	0.459	0.283	0.00606959
Nup43	1.12919e-94	0.180507	0.224	0.074	3.50648e-90		Ruvbl2	6.41603e-13	0.219031	0.386	0.2	1.99237e-08		Nup54	1.63934e-07	0.181062	0.461	0.198	0.00509065		Ddx60	3.77757e-45	0.207441	0.098	0.029	1.17305e-40		Rbfa	9.20011e-16	0.13091	0.353	0.2	2.85691e-11		Psenen	1.96096e-07	0.219422	0.661	0.487	0.00608938
Eef1akmt4	1.28832e-94	0.169626	0.15	0.035	4.00063e-90		Magohb	6.50474e-13	0.194891	0.39	0.195	2.01992e-08		H13	1.64116e-07	0.249969	0.73	0.396	0.0050963		Serf2	4.57509e-45	0.168997	0.918	0.964	1.4207e-40		Tada3	9.40752e-16	0.0883073	0.155	0.066	2.92132e-11		Snapc5	2.02851e-07	0.205194	0.362	0.208	0.00629913
Nol6	1.48076e-94	0.171596	0.174	0.046	4.59822e-90		Bcor	6.62499e-13	0.212825	0.464	0.25	2.05726e-08		Kdelr2	1.71236e-07	0.278307	0.674	0.359	0.0053174		Wdr44	4.70251e-45	0.231652	0.124	0.047	1.46027e-40		Sash1	1.14824e-15	0.0219523	0.017	0.001	3.56564e-11		Lncpint	2.2244e-07	0.200018	0.317	0.175	0.00690743
Ubald2	3.22731e-94	0.311496	0.612	0.353	1.00218e-89		A630089N07Rik	6.64415e-13	0.144385	0.237	0.1	2.06321e-08		Gm26830	1.71747e-07	0.0638115	0.079	0.013	0.00533327		Uba7	6.20032e-45	0.256362	0.148	0.066	1.92538e-40		Creb1	1.15892e-15	0.100866	0.358	0.198	3.59879e-11		Hmgcl	2.22578e-07	0.15322	0.188	0.085	0.00691171
Zranb2	3.49182e-94	0.253041	0.614	0.348	1.08431e-89		Tmem147	6.72561e-13	0.198905	0.488	0.269	2.0885e-08		Stx6	1.72658e-07	0.298711	0.64	0.331	0.00536153		Pag1	7.94956e-45	0.274099	0.217	0.123	2.46858e-40		Tmem108	1.19181e-15	0.0217536	0.017	0.001	3.70094e-11		Ly96	2.2306e-07	0.0596754	0.06	0.015	0.00692667
Plagl2	4.07694e-94	0.214017	0.302	0.122	1.26601e-89		Stoml2	6.87603e-13	0.18308	0.492	0.263	2.13521e-08		Rbm28	1.73351e-07	0.268917	0.629	0.31	0.00538308		Lgals8	8.8716e-45	0.2178	0.115	0.041	2.7549e-40		Klf10	1.21415e-15	0.0840767	0.077	0.024	3.7703e-11		Zmym3	2.24227e-07	0.0726778	0.078	0.023	0.00696291
Ubl4a	4.34343e-94	0.220125	0.396	0.182	1.34876e-89		Usp39	7.30655e-13	0.14223	0.332	0.157	2.2689e-08		Smarca5	1.80724e-07	0.311917	0.854	0.525	0.00561203		Polr2g	9.88092e-45	0.305234	0.412	0.357	3.06832e-40		Ccndbp1	1.26266e-15	0.132451	0.309	0.167	3.92092e-11		Arg1	2.26219e-07	0.106387	0.06	0.015	0.00702477
Nsun5	7.65615e-94	0.183418	0.178	0.05	2.37746e-89		Bcat1	7.42234e-13	0.11116	0.159	0.056	2.30486e-08		Gtf2f2	1.82751e-07	0.254532	0.449	0.204	0.00567496		1600014C10Rik	1.05418e-44	0.218741	0.106	0.036	3.27354e-40		Dpy19l3	1.28132e-15	0.0877541	0.135	0.055	3.97888e-11		Rps20	2.29775e-07	0.123248	1	0.999	0.0071352
Vps37a	1.28357e-93	0.189203	0.284	0.109	3.98586e-89		Slc35a4	8.0835e-13	0.149243	0.322	0.152	2.51017e-08		Psmd8	1.83719e-07	0.289935	0.753	0.449	0.00570502		Tesc	1.23382e-44	0.296161	0.423	0.351	3.83137e-40		Smpd2	1.30348e-15	0.0754967	0.083	0.026	4.04771e-11		Wdr13	2.40322e-07	0.111872	0.083	0.025	0.00746271
Carnmt1	1.31527e-93	0.207329	0.318	0.132	4.08431e-89		Ppp1r16b	8.32736e-13	0.284569	0.586	0.35	2.5859e-08		Supt16	1.85406e-07	0.354604	0.742	0.433	0.0057574		Ubn1	1.5526e-44	0.332604	0.332	0.252	4.8213e-40		Isg20	1.31758e-15	0.0915685	0.154	0.066	4.09147e-11		Slc35d2	2.43854e-07	0.0746244	0.06	0.015	0.00757241
Trmt6	1.67973e-93	0.211828	0.305	0.124	5.21607e-89		Plagl2	8.4105e-13	0.182285	0.366	0.179	2.61171e-08		Nudcd1	1.87437e-07	0.163762	0.27	0.095	0.00582048		Hadh	1.57857e-44	0.255961	0.162	0.077	4.90194e-40		Gabarapl2	1.35207e-15	0.148254	0.84	0.642	4.19857e-11		Itgb3bp	2.44009e-07	0.129963	0.133	0.052	0.00757722
Icos	2.20031e-93	0.563837	0.673	0.469	6.83261e-89		Cnot11	8.42676e-13	0.124097	0.281	0.125	2.61676e-08		Nbn	1.87741e-07	0.12254	0.169	0.046	0.00582992		Dnase2a	1.85243e-44	0.227029	0.116	0.042	5.75236e-40		Eif3k	1.35507e-15	0.188565	0.866	0.758	4.20789e-11		Abca3	2.45012e-07	0.0884427	0.083	0.025	0.00760837
Eif4g1	2.57459e-93	0.268072	0.629	0.357	7.99487e-89		Utp6	8.5398e-13	0.185768	0.383	0.194	2.65186e-08		Fasn	1.88086e-07	0.234971	0.461	0.21	0.00584062		Anxa1	3.68505e-44	0.201243	0.082	0.02	1.14432e-39		Dennd1c	1.44261e-15	0.111435	0.255	0.128	4.47973e-11		Clcn3	2.46351e-07	0.188505	0.358	0.206	0.00764994
Sf3b4	3.43685e-93	0.201563	0.347	0.15	1.06725e-88		Usp16	8.77134e-13	0.183712	0.468	0.251	2.72376e-08		Tjp2	1.8888e-07	0.0775878	0.079	0.013	0.00586528		Arl2bp	3.74716e-44	0.321957	0.262	0.175	1.1636e-39		Gm17745	1.44317e-15	0.0742039	0.071	0.021	4.48147e-11		Inpp5b	2.47117e-07	0.156019	0.239	0.117	0.00767371
Mrpl3	7.63453e-93	0.218616	0.361	0.16	2.37075e-88		Comtd1	8.82576e-13	0.159903	0.275	0.124	2.74066e-08		Ddx18	1.89133e-07	0.308946	0.73	0.405	0.00587314		Pts	4.66341e-44	0.299341	0.223	0.132	1.44813e-39		Ube2e2	1.46787e-15	0.0445068	0.029	0.004	4.55819e-11		Tmem263	2.49477e-07	0.178686	0.161	0.07	0.00774699
Satb1	9.10978e-93	0.490184	0.844	0.735	2.82886e-88		Thap12	8.9225e-13	0.183325	0.359	0.179	2.77071e-08		Riok2	1.90031e-07	0.202996	0.337	0.134	0.00590103		Tor1aip1	5.46261e-44	0.338758	0.356	0.279	1.6963e-39		Ndufa13	1.51456e-15	0.158307	0.885	0.762	4.70316e-11		Ap3s1	2.56816e-07	0.211435	0.436	0.274	0.00797491
Eif3l	9.3036e-93	0.248815	0.557	0.302	2.88905e-88		Bcl3	9.06061e-13	0.155042	0.22	0.09	2.81359e-08		Mrpl1	1.94838e-07	0.140133	0.292	0.105	0.00605031		Dynlrb1	5.76845e-44	0.330616	0.403	0.345	1.79128e-39		Myo1g	1.64616e-15	0.129845	0.241	0.124	5.11181e-11		Foxred1	2.58648e-07	0.166572	0.138	0.056	0.00803178
Siah2	1.03401e-92	0.176744	0.218	0.071	3.2109e-88		Eif3l	9.63405e-13	0.220631	0.651	0.383	2.99166e-08		Osbpl8	1.97526e-07	0.247117	0.449	0.203	0.00613378		Rplp2	6.49385e-44	0.0967193	0.998	1	2.01654e-39		Camk2g	1.65235e-15	0.0944107	0.22	0.106	5.13105e-11		Atoh8	2.61285e-07	0.0230986	0.014	0.001	0.00811368
Ctu2	1.36595e-92	0.207434	0.285	0.113	4.2417e-88		Furin	9.75872e-13	0.195684	0.685	0.418	3.03037e-08		Tuba1c	2.00007e-07	0.251343	0.438	0.192	0.00621082		Phf3	7.32619e-44	0.322773	0.477	0.451	2.275e-39		Cmpk2	1.67699e-15	0.0345211	0.028	0.004	5.20755e-11		P4ha2	2.63952e-07	0.0223198	0.014	0.001	0.0081965
Prrc2c	1.68975e-92	0.25252	0.948	0.784	5.24719e-88		Olfr1369-ps1	9.98031e-13	0.148734	0.075	0.017	3.09919e-08		Sarnp	2.00338e-07	0.238249	0.753	0.39	0.00622111		Usp25	7.649e-44	0.334509	0.297	0.212	2.37525e-39		Trappc3	1.79744e-15	0.108876	0.304	0.163	5.58158e-11		Dgka	2.7028e-07	0.192113	0.257	0.13	0.00839302
Tra2a	1.99879e-92	0.265471	0.81	0.528	6.20684e-88		Klf9	1.04227e-12	0.157413	0.298	0.14	3.23655e-08		Senp6	2.08254e-07	0.313024	0.876	0.595	0.00646692		Faap20	7.80937e-44	0.260469	0.171	0.086	2.42504e-39		Krt10	1.81401e-15	0.0854138	0.091	0.031	5.63306e-11		Zfp995	2.73323e-07	0.0745321	0.055	0.013	0.0084875
Notch1	2.29956e-92	0.238307	0.446	0.218	7.14082e-88		Ywhae	1.05014e-12	0.243187	0.742	0.48	3.261e-08		Mir17hg	2.13869e-07	0.19508	0.281	0.103	0.00664128		Eef2	8.21943e-44	0.164969	0.928	0.965	2.55238e-39		Cisd3	1.90395e-15	0.0878497	0.121	0.047	5.91233e-11		Lrch3	2.75395e-07	0.185685	0.298	0.162	0.00855185
Dohh	2.37095e-92	0.201142	0.341	0.146	7.36252e-88		Chka	1.06528e-12	0.107181	0.2	0.078	3.30801e-08		Nup50	2.19633e-07	0.258656	0.472	0.214	0.00682028		Trp53i11	9.82157e-44	0.207262	0.1	0.032	3.04989e-39		Tap2	2.04226e-15	0.15137	0.657	0.434	6.34182e-11		Trp53inp1	2.77947e-07	0.175269	0.284	0.148	0.00863109
Gnl1	2.64456e-92	0.22458	0.415	0.197	8.21214e-88		Mrpl21	1.07249e-12	0.207503	0.631	0.369	3.33039e-08		Timm8b	2.28698e-07	0.277626	0.607	0.319	0.00710175		Nr3c1	1.48052e-43	0.2794	0.448	0.371	4.59747e-39		Sidt1	2.13729e-15	0.149929	0.146	0.063	6.63692e-11		Zfp57	2.86066e-07	0.0327	0.018	0.002	0.00888319
Tmed2	3.64048e-92	0.261057	0.873	0.648	1.13048e-87		Tmem88	1.07948e-12	0.0885716	0.085	0.021	3.35212e-08		Fancf	2.34682e-07	0.147056	0.18	0.053	0.00728757		Hint3	1.76807e-43	0.286173	0.204	0.116	5.49039e-39		Bak1	2.47677e-15	0.114622	0.21	0.103	7.69111e-11		Dynlt1f	2.88107e-07	0.101381	0.124	0.047	0.00894658
Rpn1	4.7006e-92	0.239699	0.467	0.234	1.45968e-87		Rpl32	1.10749e-12	0.111374	1	1	3.43908e-08		Ppan	2.36176e-07	0.277266	0.708	0.382	0.00733398		Kmt2c	1.78989e-43	0.313272	0.245	0.156	5.55816e-39		Snx10	2.5346e-15	0.0810785	0.075	0.023	7.87069e-11		Gatd1	2.95404e-07	0.121263	0.183	0.081	0.00917319
Zfp706	4.8255e-92	0.271113	0.753	0.486	1.49846e-87		2700038G22Rik	1.11231e-12	0.152242	0.237	0.101	3.45407e-08		Prps1	2.37189e-07	0.226881	0.416	0.184	0.00736542		Aplp2	2.26387e-43	0.378126	0.376	0.317	7.03001e-39		Arhgap9	2.71705e-15	0.0933275	0.575	0.343	8.43725e-11		Sgms1	2.97575e-07	0.10301	0.119	0.044	0.00924059
Smim13	3.37421e-91	0.160531	0.166	0.044	1.04779e-86		Rps25	1.15244e-12	0.151477	0.997	0.988	3.57866e-08		Cep83	2.37888e-07	0.22216	0.416	0.178	0.00738714		Rit1	2.45932e-43	0.204985	0.107	0.037	7.63693e-39		Rcan3	2.76125e-15	0.0544278	0.051	0.012	8.5745e-11		Flot1	3.00648e-07	0.111689	0.17	0.072	0.00933603
Prnp	4.40931e-91	0.125262	0.076	0.004	1.36922e-86		Nudt5	1.17788e-12	0.200958	0.458	0.244	3.65766e-08		Anp32e	2.39418e-07	0.335806	0.775	0.453	0.00743465		Plekho2	2.57774e-43	0.205561	0.104	0.035	8.00464e-39		Tmem19	2.78355e-15	0.0780079	0.118	0.045	8.64375e-11		Kmt5b	3.00661e-07	0.22671	0.339	0.199	0.00933644
Dgkh	1.29544e-90	0.160728	0.122	0.023	4.02274e-86		Ahsa2	1.21195e-12	0.17338	0.393	0.2	3.76348e-08		Txnl1	2.42859e-07	0.286568	0.798	0.513	0.0075415		Eif4a2	2.87133e-43	0.261232	0.663	0.695	8.91636e-39		Eef1akmt1	2.80107e-15	0.140641	0.249	0.13	8.69817e-11		Uty	3.01479e-07	0.147177	0.165	0.071	0.00936182
Ssr2	1.6865e-90	0.254676	0.586	0.329	5.2371e-86		Exosc2	1.27598e-12	0.159516	0.254	0.111	3.9623e-08		Gspt1	2.5061e-07	0.288748	0.865	0.501	0.00778218		Gpi1	3.42106e-43	0.295971	0.527	0.517	1.06234e-38		Ube2r2	2.85245e-15	0.144798	0.424	0.257	8.85772e-11		Rrm2b	3.03981e-07	0.181333	0.174	0.078	0.00943953
Farsb	2.02971e-90	0.205455	0.285	0.114	6.30286e-86		Pfkp	1.36004e-12	0.168611	0.522	0.28	4.22335e-08		Cks1b	2.60471e-07	0.167516	0.292	0.109	0.0080884		Ifnar2	4.18293e-43	0.271809	0.179	0.094	1.29892e-38		Git2	2.88354e-15	0.169776	0.53	0.336	8.95424e-11		Txndc15	3.04266e-07	0.169365	0.257	0.132	0.00944837
Smarca5	3.52201e-90	0.270578	0.697	0.437	1.09369e-85		Nvl	1.45531e-12	0.161361	0.339	0.164	4.51919e-08		Dennd5b	2.62533e-07	0.0444935	0.045	0.005	0.00815245		Prdx2	4.82125e-43	0.281203	0.494	0.454	1.49714e-38		Nudt2	2.98743e-15	0.0859298	0.146	0.062	9.27688e-11		Fosb	3.05892e-07	0.369715	0.289	0.169	0.00949886
Fam133b	4.71051e-90	0.236325	0.476	0.244	1.46276e-85		Sema4b	1.47196e-12	0.135647	0.173	0.064	4.57088e-08		Cfdp1	2.6806e-07	0.256327	0.685	0.362	0.00832407		Ppp2r5c	6.13915e-43	0.321288	0.27	0.183	1.90639e-38		Sdhd	3.03712e-15	0.150004	0.416	0.253	9.43116e-11		Dctn2	3.10502e-07	0.179634	0.335	0.185	0.00964203
Ube2f	5.29771e-90	0.208265	0.396	0.185	1.6451e-85		Prkrip1	1.47823e-12	0.121474	0.288	0.129	4.59035e-08		Champ1	2.74334e-07	0.139108	0.292	0.106	0.00851889		Marf1	6.14775e-43	0.279495	0.179	0.094	1.90906e-38		Fgfr1op2	3.06055e-15	0.167482	0.544	0.356	9.50394e-11		Sfi1	3.26194e-07	0.170008	0.128	0.05	0.0101293
Dnajb11	8.95451e-90	0.259876	0.617	0.354	2.78064e-85		Asf1a	1.48024e-12	0.181533	0.407	0.211	4.59659e-08		Trpm6	2.80095e-07	0.265677	0.348	0.143	0.00869777		Tbrg1	6.79596e-43	0.317704	0.446	0.409	2.11035e-38		Commd3	3.09501e-15	0.141585	0.356	0.202	9.61093e-11		Stk38	3.2635e-07	0.254988	0.321	0.184	0.0101342
Pabpc1	9.00517e-90	0.206559	0.988	0.911	2.79637e-85		Polr1b	1.5358e-12	0.166247	0.281	0.13	4.76911e-08		Nxt1	2.84167e-07	0.220844	0.483	0.223	0.00882425		Lsm4	9.70519e-43	0.276527	0.54	0.526	3.01375e-38		Slc43a2	3.25779e-15	0.0860313	0.108	0.04	1.01164e-10		Taf6l	3.27023e-07	0.203335	0.404	0.239	0.0101551
Selenos	1.89479e-89	0.265428	0.673	0.403	5.88388e-85		Neto2	1.58444e-12	0.114487	0.108	0.032	4.92015e-08		Pon2	2.9068e-07	0.298695	0.371	0.155	0.0090265		Ralgps2	1.00456e-42	0.255771	0.143	0.064	3.11945e-38		Smim14	3.32577e-15	0.114978	0.396	0.225	1.03275e-10		Dock8	3.28217e-07	0.152564	0.381	0.214	0.0101921
Rock2	3.59303e-89	0.217271	0.39	0.184	1.11574e-84		Ankrd13b	1.61519e-12	0.106353	0.092	0.024	5.01565e-08		Gm37294	3.05169e-07	0.0178814	0.011	0	0.00947641		Cmc1	1.03797e-42	0.306403	0.26	0.172	3.2232e-38		Axin2	3.39112e-15	0.122826	0.146	0.063	1.05304e-10		Lpar6	3.37399e-07	0.200648	0.477	0.289	0.0104773
Tmem33	3.91118e-89	0.224387	0.377	0.175	1.21454e-84		Rce1	1.66085e-12	0.124962	0.325	0.153	5.15744e-08		Actn3	3.05169e-07	0.0145207	0.011	0	0.00947641		Smpd1	1.08742e-42	0.167311	0.076	0.018	3.37678e-38		Immp1l	3.39157e-15	0.115629	0.329	0.181	1.05318e-10		Tep1	3.47e-07	0.098353	0.083	0.026	0.0107754
Ppm1g	6.20382e-89	0.246351	0.595	0.335	1.92647e-84		Nrp1	1.75193e-12	0.133814	0.146	0.05	5.44026e-08		AC159200.1	3.06901e-07	0.0177377	0.011	0	0.00953021		Cklf	1.2327e-42	0.334547	0.305	0.221	3.82791e-38		Ankrd54	3.49044e-15	0.0820355	0.195	0.091	1.08388e-10		Gna15	3.50029e-07	0.169348	0.188	0.086	0.0108695
Pla2g12a	7.64457e-89	0.172634	0.181	0.053	2.37387e-84		Ythdf2	1.84751e-12	0.161536	0.515	0.277	5.73708e-08		Gm26562	3.06901e-07	0.0141047	0.011	0	0.00953021		Ccng2	1.3196e-42	0.186535	0.083	0.022	4.09774e-38		Sell	3.87617e-15	0.0512913	0.032	0.005	1.20367e-10		Gm527	3.51828e-07	0.0504246	0.023	0.003	0.0109253
Ikbkap	1.15218e-88	0.178805	0.215	0.072	3.57785e-84		Alkbh1	1.88196e-12	0.23161	0.546	0.315	5.84404e-08		Olfr373	3.06901e-07	0.0140434	0.011	0	0.00953021		Plekhf1	1.32271e-42	0.138451	0.057	0.008	4.10741e-38		Card11	3.90453e-15	0.116095	0.218	0.106	1.21247e-10		Oaf	3.56104e-07	0.0481019	0.037	0.007	0.0110581
Pebp1	1.18176e-88	0.260495	0.815	0.561	3.66972e-84		Eftud2	1.88789e-12	0.167324	0.403	0.204	5.86245e-08		Olfr107	3.06901e-07	0.0102914	0.011	0	0.00953021		Casp8	1.87423e-42	0.305877	0.337	0.252	5.82005e-38		Mex3b	3.94368e-15	0.0680392	0.063	0.017	1.22463e-10		Atp5h	3.73103e-07	0.170791	0.95	0.921	0.011586
Simc1	1.57449e-88	0.161847	0.135	0.03	4.88927e-84		Psmb2	1.89468e-12	0.237743	0.831	0.589	5.88356e-08		Clec4d	3.06901e-07	0.00926905	0.011	0	0.00953021		B4galt1	2.16944e-42	0.288249	0.183	0.099	6.73677e-38		Gm16124	3.95696e-15	0.0874508	0.101	0.036	1.22875e-10		Vps13c	3.73691e-07	0.108283	0.138	0.055	0.0116042
Pbdc1	2.00812e-88	0.217941	0.378	0.176	6.23582e-84		Tgs1	1.98466e-12	0.156959	0.397	0.2	6.16295e-08		Gm12333	3.06901e-07	0.0089979	0.011	0	0.00953021		Sh3kbp1	2.30849e-42	0.312381	0.419	0.356	7.16856e-38		Lair1	4.04678e-15	0.0320163	0.022	0.002	1.25665e-10		Eml3	3.81631e-07	0.125797	0.106	0.038	0.0118508
Bax	2.01561e-88	0.246211	0.746	0.469	6.25906e-84		Slamf6	2.01596e-12	0.250211	0.393	0.205	6.26016e-08		Gm10561	3.06901e-07	0.00783899	0.011	0	0.00953021		Acot13	2.36875e-42	0.241303	0.154	0.073	7.35566e-38		Gatd1	4.12753e-15	0.083945	0.172	0.077	1.28172e-10		Chd2	3.83846e-07	0.182198	0.491	0.31	0.0119196
Spred1	2.63077e-88	0.156773	0.151	0.038	8.16932e-84		Mrpl30	2.01623e-12	0.198295	0.749	0.466	6.26101e-08		Eif3c	3.08147e-07	0.285067	0.888	0.649	0.00956888		Ublcp1	2.43835e-42	0.202294	0.099	0.032	7.5718e-38		Rmnd1	4.15664e-15	0.0686172	0.095	0.033	1.29076e-10		Atox1	3.86635e-07	0.190284	0.486	0.308	0.0120062
Scn1b	7.7769e-88	0.162567	0.123	0.024	2.41496e-83		Gde1	2.26584e-12	0.136405	0.386	0.191	7.03611e-08		Hey1	3.09918e-07	0.0306701	0.022	0.001	0.00962387		Trafd1	3.47883e-42	0.240299	0.133	0.057	1.08028e-37		Mettl27	4.22921e-15	0.0608854	0.051	0.012	1.3133e-10		Mast4	3.88286e-07	0.0931252	0.092	0.03	0.0120574
Rgs16	1.44554e-87	0.230733	0.095	0.012	4.48883e-83		D17Wsu92e	2.32405e-12	0.140227	0.397	0.198	7.21686e-08		Spsb1	3.12647e-07	0.0257739	0.022	0.001	0.00970864		Ppil2	4.22716e-42	0.311798	0.252	0.168	1.31266e-37		Htatip2	4.60437e-15	0.0836095	0.198	0.093	1.42979e-10		Faah	3.96537e-07	0.169947	0.298	0.158	0.0123137
Azin1	1.48707e-87	0.222964	0.376	0.177	4.61781e-83		Mrrf	2.34588e-12	0.119538	0.176	0.066	7.28466e-08		Zdhhc3	3.16929e-07	0.187168	0.382	0.16	0.00984161		Ppm1m	4.41486e-42	0.204496	0.11	0.04	1.37095e-37		Dnm2	4.97355e-15	0.127378	0.276	0.148	1.54444e-10		Phf12	4.01163e-07	0.150555	0.252	0.129	0.0124573
Polr1e	2.06461e-87	0.177801	0.217	0.074	6.41123e-83		Stat3	2.44104e-12	0.235825	0.539	0.313	7.58017e-08		Myo5a	3.22187e-07	0.0859952	0.09	0.017	0.0100049		Usp48	4.59719e-42	0.330174	0.242	0.157	1.42757e-37		Tradd	5.28267e-15	0.116159	0.2	0.097	1.64043e-10		Dhrs1	4.08698e-07	0.107138	0.101	0.035	0.0126913
Sept11	2.24773e-87	0.278918	0.499	0.274	6.97988e-83		Vkorc1l1	2.70843e-12	0.126207	0.224	0.094	8.41049e-08		Ampd2	3.24081e-07	0.129719	0.225	0.074	0.0100637		Fam214a	4.66095e-42	0.174454	0.085	0.023	1.44736e-37		Mboat1	5.2973e-15	0.0806279	0.1	0.036	1.64497e-10		Def8	4.11381e-07	0.0740601	0.05	0.012	0.0127746
Gfi1	2.8073e-87	0.230053	0.357	0.163	8.71751e-83		Fam136a	2.78672e-12	0.166256	0.342	0.166	8.6536e-08		Gm2a	3.27786e-07	0.148656	0.292	0.106	0.0101788		Erlec1	6.5535e-42	0.288425	0.181	0.097	2.03506e-37		1600002K03Rik	5.33612e-15	0.0895096	0.151	0.065	1.65702e-10		Nedd8	4.19439e-07	0.191827	0.784	0.681	0.0130248
Impdh1	1.31081e-86	0.179907	0.285	0.115	4.07046e-82		Rpf1	2.85503e-12	0.174555	0.444	0.238	8.86572e-08		Aamp	3.29464e-07	0.260537	0.697	0.368	0.0102309		Sp140	7.61788e-42	0.237904	0.135	0.059	2.36558e-37		Chd2	5.36515e-15	0.122887	0.496	0.302	1.66604e-10		Wdr5b	4.26116e-07	0.086277	0.055	0.014	0.0132322
Hdac2	2.9432e-86	0.209788	0.437	0.216	9.13951e-82		Psma6	2.93264e-12	0.220808	0.759	0.488	9.10673e-08		Psat1	3.33895e-07	0.169148	0.236	0.082	0.0103684		Peak1	7.69597e-42	0.34392	0.296	0.215	2.38983e-37		Pcsk7	5.41515e-15	0.0968921	0.215	0.105	1.68157e-10		Med13l	4.29705e-07	0.204675	0.229	0.117	0.0133436
Dnmt3a	3.23906e-86	0.218379	0.373	0.174	1.00582e-81		Abcf1	2.99902e-12	0.204287	0.708	0.45	9.31284e-08		Ifrd2	3.5223e-07	0.183999	0.393	0.166	0.0109378		Dennd4c	9.05296e-42	0.265104	0.176	0.091	2.81122e-37		Pitpnm1	5.46071e-15	0.109088	0.158	0.07	1.69571e-10		Atp6v1d	4.3191e-07	0.152833	0.353	0.195	0.0134121
Ccdc59	4.50938e-86	0.225588	0.548	0.299	1.4003e-81		Riox2	3.24195e-12	0.164631	0.319	0.153	1.00672e-07		Pigu	3.65628e-07	0.123461	0.18	0.053	0.0113539		4930453N24Rik	9.83094e-42	0.337154	0.323	0.251	3.0528e-37		Zdhhc4	6.15519e-15	0.0993306	0.138	0.058	1.91137e-10		Fam160b1	4.34729e-07	0.146237	0.216	0.104	0.0134996
Tbc1d15	4.88239e-86	0.190377	0.362	0.164	1.51613e-81		Zfp296	3.24526e-12	0.0716344	0.068	0.015	1.00775e-07		Golt1b	3.68639e-07	0.157224	0.36	0.145	0.0114473		Mum1	1.03726e-41	0.252219	0.154	0.074	3.221e-37		Trp53inp1	6.72164e-15	0.103082	0.273	0.143	2.08727e-10		Ntan1	4.3902e-07	0.183253	0.353	0.206	0.0136329
Csnk1d	1.13921e-85	0.201689	0.438	0.216	3.5376e-81		Mogs	3.29848e-12	0.186449	0.519	0.288	1.02428e-07		Tgif1	3.75025e-07	0.24998	0.438	0.201	0.0116456		Nbeal2	1.20647e-41	0.261963	0.156	0.076	3.74645e-37		Gm29336	6.85714e-15	0.0332347	0.023	0.003	2.12935e-10		Rps9	4.49218e-07	0.100697	1	1	0.0139496
Galk1	1.43014e-85	0.183609	0.223	0.079	4.44103e-81		Mindy3	3.30664e-12	0.152112	0.302	0.14	1.02681e-07		Cox5a	3.75155e-07	0.283393	0.978	0.829	0.0116497		Taz	1.48452e-41	0.291377	0.197	0.112	4.60987e-37		Slc9b2	7.0171e-15	0.0213859	0.018	0.002	2.17902e-10		Slc16a3	4.52645e-07	0.0867553	0.06	0.016	0.014056
Txlna	1.84117e-85	0.200087	0.295	0.124	5.71739e-81		Srsf3	3.33733e-12	0.210557	0.953	0.821	1.03634e-07		Dnajb9	3.91739e-07	0.357153	0.494	0.248	0.0121647		Herc1	1.61079e-41	0.325537	0.255	0.168	5.00199e-37		Spata6	7.07565e-15	0.0722775	0.115	0.044	2.1972e-10		Lats2	4.62659e-07	0.122521	0.133	0.053	0.0143669
Eif2s3x	2.09289e-85	0.203171	0.377	0.176	6.49906e-81		Nr4a2	3.50704e-12	0.102493	0.305	0.145	1.08904e-07		Dctpp1	3.92055e-07	0.20553	0.494	0.227	0.0121745		Slc27a6	1.85389e-41	0.149557	0.06	0.01	5.75689e-37		Rpl37a	7.29107e-15	0.103344	0.998	0.999	2.26409e-10		St6gal1	4.62893e-07	0.0953134	0.083	0.026	0.0143742
Mrps18b	3.11996e-85	0.201017	0.331	0.147	9.68842e-81		Nsg1	3.94698e-12	0.0283792	0.017	0.001	1.22566e-07		Mettl16	3.95272e-07	0.245948	0.506	0.244	0.0122744		Slc38a9	1.85635e-41	0.246603	0.133	0.058	5.76453e-37		Xaf1	7.98245e-15	0.10275	0.209	0.102	2.47879e-10		Runx3	4.77767e-07	0.247561	0.468	0.304	0.0148361
Trmt10c	3.21936e-85	0.189817	0.414	0.199	9.99709e-81		Gpr146	3.99719e-12	0.06644	0.058	0.011	1.24125e-07		Pcnp	4.00466e-07	0.231746	0.697	0.369	0.0124357		4732440D04Rik	1.95653e-41	0.231529	0.123	0.05	6.07561e-37		Tha1	8.11513e-15	0.0628873	0.052	0.013	2.51999e-10		Xrn1	4.78435e-07	0.166547	0.339	0.191	0.0148568
Ghitm	3.66666e-85	0.226356	0.586	0.33	1.13861e-80		Heatr1	4.01433e-12	0.155473	0.376	0.19	1.24657e-07		Tatdn2	4.03042e-07	0.15307	0.326	0.125	0.0125157		Dse	2.17438e-41	0.184908	0.086	0.025	6.75211e-37		Rsu1	8.22354e-15	0.12227	0.23	0.117	2.55365e-10		Rpl19	4.82936e-07	0.0874785	1	1	0.0149966
Mrpl17	3.73705e-85	0.214559	0.389	0.187	1.16047e-80		Rnf19b	4.1129e-12	0.205163	0.407	0.216	1.27718e-07		Thumpd1	4.0746e-07	0.264561	0.551	0.272	0.0126529		Vgll4	2.86316e-41	0.326575	0.379	0.317	8.89096e-37		Retreg2	8.44032e-15	0.11747	0.215	0.107	2.62097e-10		Dffa	4.95372e-07	0.126715	0.106	0.038	0.0153828
Map2k3os	2.68484e-84	0.116052	0.086	0.009	8.33723e-80		Cers2	4.2808e-12	0.136776	0.495	0.26	1.32932e-07		1810032O08Rik	4.11608e-07	0.139082	0.315	0.12	0.0127817		Ikbkb	4.22668e-41	0.336641	0.347	0.278	1.31251e-36		Zfand6	8.5845e-15	0.136263	0.469	0.289	2.66574e-10		Arpc3	4.99655e-07	0.176282	0.917	0.833	0.0155158
Psmc5	2.97352e-84	0.229	0.55	0.304	9.23366e-80		Nop10	4.29024e-12	0.232413	0.858	0.685	1.33225e-07		Rcc1	4.15213e-07	0.222499	0.281	0.108	0.0128936		Dbp	4.25217e-41	0.228485	0.116	0.045	1.32043e-36		Ncor1	8.64025e-15	0.160704	0.837	0.666	2.68306e-10		Slc4a2	5.03285e-07	0.130613	0.128	0.051	0.0156285
Cnih4	3.55223e-84	0.213955	0.406	0.199	1.10307e-79		Nle1	4.49801e-12	0.113634	0.251	0.11	1.39677e-07		Rbbp7	4.18685e-07	0.327085	0.719	0.432	0.0130014		Pik3cg	4.3976e-41	0.185849	0.088	0.026	1.36559e-36		Tmie	8.6457e-15	0.0494827	0.048	0.011	2.68475e-10		Klf3	5.04335e-07	0.199702	0.523	0.336	0.0156611
Ccdc50	9.6257e-84	0.205163	0.314	0.136	2.98907e-79		Txnl1	4.67008e-12	0.22391	0.773	0.508	1.4502e-07		1810009A15Rik	4.27807e-07	0.0480392	0.067	0.011	0.0132847		Zc3h6	5.40799e-41	0.177098	0.076	0.019	1.67934e-36		Ssbp3	9.3084e-15	0.138922	0.252	0.133	2.89054e-10		Rad50	5.09775e-07	0.225802	0.344	0.203	0.01583
Prelid3b	3.68647e-83	0.210088	0.337	0.156	1.14476e-78		Farp1	5.23108e-12	0.0543949	0.071	0.016	1.62441e-07		Map1s	4.50927e-07	0.13171	0.236	0.08	0.0140026		Gab3	5.76581e-41	0.17708	0.082	0.023	1.79046e-36		Tep1	9.68529e-15	0.0690784	0.075	0.024	3.00757e-10		Zfand6	5.1211e-07	0.248007	0.45	0.297	0.0159025
Hnrnpm	8.02361e-83	0.250267	0.707	0.444	2.49157e-78		Slc25a15	5.65973e-12	0.0828506	0.088	0.024	1.75752e-07		Slc52a2	4.65961e-07	0.104472	0.247	0.084	0.0144695		Snapc5	6.22807e-41	0.295908	0.252	0.167	1.934e-36		Traf3ip3	9.8286e-15	0.113255	0.464	0.275	3.05208e-10		Fbxl19	5.17732e-07	0.0443331	0.032	0.005	0.0160771
Prmt3	9.57057e-83	0.193481	0.307	0.133	2.97195e-78		Rif1	5.65974e-12	0.200261	0.664	0.406	1.75752e-07		Oaz1	4.84801e-07	0.19451	1	0.981	0.0150545		Crlf3	6.38636e-41	0.310909	0.4	0.333	1.98316e-36		Actr10	1.01334e-14	0.145811	0.524	0.339	3.14671e-10		Nim1k	5.35216e-07	0.0451313	0.037	0.007	0.0166201
Syce2	1.03185e-82	0.135967	0.114	0.022	3.20419e-78		Tars	5.72224e-12	0.189264	0.492	0.27	1.77693e-07		Timm50	4.90759e-07	0.241751	0.483	0.23	0.0152396		Trim56	6.86761e-41	0.296377	0.199	0.114	2.1326e-36		Pstk	1.01876e-14	0.108976	0.198	0.096	3.16354e-10		Kdm2a	5.36122e-07	0.228221	0.472	0.309	0.0166482
Isyna1	2.30734e-82	0.196655	0.303	0.131	7.16499e-78		Nsfl1c	6.20388e-12	0.142532	0.515	0.277	1.92649e-07		Kmt5a	5.20636e-07	0.281513	0.573	0.29	0.0161673		Hist1h1c	8.461e-41	0.216255	0.102	0.035	2.6274e-36		Top2b	1.08065e-14	0.143079	0.513	0.319	3.35573e-10		Miip	5.37164e-07	0.133623	0.151	0.063	0.0166805
Zbed5	2.45915e-82	0.113915	0.074	0.006	7.63639e-78		Ptger2	6.23641e-12	0.14259	0.159	0.059	1.93659e-07		Cd69	5.23801e-07	0.325515	0.719	0.408	0.0162656		Esco1	8.56524e-41	0.334394	0.318	0.241	2.65976e-36		Atp6v1d	1.14612e-14	0.119478	0.338	0.188	3.55906e-10		Mkrn1	5.39324e-07	0.197498	0.509	0.327	0.0167476
5430416N02Rik	2.64317e-82	0.164636	0.176	0.054	8.20784e-78		Eif3d	6.36894e-12	0.221724	0.786	0.526	1.97775e-07		Tcof1	5.24975e-07	0.223051	0.663	0.335	0.016302		Fam204a	9.36908e-41	0.339817	0.273	0.194	2.90938e-36		Igsf3	1.14651e-14	0.084826	0.074	0.023	3.56024e-10		Cnst	5.43825e-07	0.0981043	0.11	0.04	0.0168874
Prmt6	2.88388e-82	0.160007	0.186	0.059	8.9553e-78		Urb2	6.40613e-12	0.10057	0.139	0.048	1.9893e-07		Psmb2	5.29635e-07	0.287147	0.888	0.593	0.0164468		Rpl6	1.61925e-40	0.0977532	0.999	0.999	5.02824e-36		Rbm5	1.20629e-14	0.142114	0.598	0.399	3.7459e-10		Dkkl1	5.50138e-07	0.0980543	0.055	0.014	0.0170834
Taf4b	3.94292e-82	0.14227	0.119	0.025	1.2244e-77		Pkm	6.45228e-12	0.224709	0.922	0.72	2.00363e-07		Heatr3	5.30715e-07	0.195997	0.303	0.12	0.0164803		Sgsh	1.78971e-40	0.12189	0.048	0.005	5.55759e-36		Hpcal1	1.2856e-14	0.110577	0.276	0.148	3.99217e-10		Ppp3ca	5.63753e-07	0.1882	0.454	0.28	0.0175062
Timm13	4.84916e-82	0.256004	0.771	0.509	1.50581e-77		Ecm1	7.04254e-12	0.0713334	0.058	0.012	2.18692e-07		Gm12185	5.65668e-07	0.0622598	0.067	0.011	0.0175657		Iqgap1	2.16802e-40	0.328937	0.389	0.321	6.73234e-36		Cenpa	1.3323e-14	0.164549	0.14	0.061	4.13718e-10		Ppp1r18	5.65249e-07	0.184508	0.532	0.338	0.0175527
Nadk	8.93507e-82	0.165443	0.295	0.124	2.77461e-77		Snrpe	7.15142e-12	0.202654	0.925	0.731	2.22073e-07		Timm13	5.67778e-07	0.30077	0.899	0.598	0.0176312		Ntan1	2.65062e-40	0.310941	0.248	0.165	8.23098e-36		Oma1	1.45275e-14	0.076674	0.1	0.036	4.51123e-10		Plekhg2	5.70681e-07	0.0940145	0.138	0.055	0.0177214
Rab10	1.19003e-81	0.238477	0.619	0.362	3.6954e-77		Slc29a3	7.27663e-12	0.121407	0.136	0.047	2.25961e-07		Klhdc4	5.77918e-07	0.181649	0.393	0.168	0.0179461		Zfp683	3.47475e-40	0.122282	0.049	0.005	1.07902e-35		Osbpl9	1.47629e-14	0.114763	0.246	0.128	4.58433e-10		Mthfr	5.73069e-07	0.0848434	0.06	0.016	0.0177955
Degs1	1.38164e-81	0.21116	0.37	0.177	4.29042e-77		Tmed5	7.53854e-12	0.229526	0.82	0.568	2.34094e-07		Mcm3	5.81086e-07	0.146486	0.292	0.109	0.0180445		Bola1	3.70988e-40	0.271914	0.177	0.095	1.15203e-35		Isoc1	1.50503e-14	0.104509	0.184	0.087	4.67358e-10		Cirbp	5.75283e-07	0.21337	0.5	0.313	0.0178642
Slc7a6	1.42453e-81	0.163178	0.153	0.042	4.42359e-77		Btaf1	7.69635e-12	0.136435	0.325	0.158	2.38995e-07		Nr6a1	5.82277e-07	0.103095	0.09	0.018	0.0180814		Nudt18	5.16756e-40	0.223882	0.125	0.053	1.60468e-35		Cisd1	1.55122e-14	0.11469	0.232	0.12	4.81701e-10		Hs2st1	5.75371e-07	0.197914	0.216	0.109	0.017867
Gmfb	3.5936e-81	0.201008	0.398	0.195	1.11592e-76		Banf1	8.08265e-12	0.202576	0.722	0.455	2.50991e-07		Shmt2	5.87376e-07	0.181212	0.326	0.132	0.0182398		Fam3c	5.668e-40	0.276091	0.235	0.147	1.76008e-35		Mocs2	1.64671e-14	0.0990927	0.19	0.091	5.11353e-10		Enpp5	5.78669e-07	0.103227	0.073	0.022	0.0179694
Golt1b	7.32973e-81	0.173581	0.244	0.095	2.2761e-76		B630019A10Rik	8.30519e-12	0.0944076	0.068	0.015	2.57901e-07		Usp16	5.87709e-07	0.236412	0.528	0.255	0.0182501		Ppib	6.33194e-40	0.185366	0.785	0.811	1.96626e-35		Ndufv2	1.69798e-14	0.160881	0.541	0.363	5.27274e-10		H1f0	5.82582e-07	0.130362	0.161	0.069	0.0180909
Ubqln1	7.48743e-81	0.18817	0.319	0.142	2.32507e-76		Smarca4	8.6156e-12	0.173135	0.481	0.266	2.6754e-07		Ccdc9	5.90186e-07	0.152369	0.326	0.128	0.018327		Sertad3	6.46558e-40	0.176528	0.085	0.025	2.00776e-35		Ube2h	1.71468e-14	0.13788	0.435	0.262	5.32461e-10		Kif1b	5.89061e-07	0.139261	0.142	0.059	0.0182921
St13	1.40864e-80	0.271414	0.602	0.364	4.37425e-76		Ube2l6	9.16043e-12	0.0416715	0.027	0.003	2.84459e-07		Mrps10	5.95548e-07	0.180689	0.393	0.168	0.0184936		Npc1	6.5461e-40	0.211807	0.113	0.044	2.03276e-35		Inpp5k	1.80721e-14	0.0768222	0.174	0.079	5.61193e-10		Kif21b	5.93826e-07	0.150878	0.284	0.15	0.0184401
Samd4	1.81332e-80	0.109479	0.073	0.006	5.63089e-76		Otud4	9.18786e-12	0.142712	0.454	0.238	2.85311e-07		Memo1	5.97908e-07	0.205524	0.36	0.15	0.0185668		Rpl13a	6.61689e-40	0.199405	0.794	0.849	2.05474e-35		P2ry1	1.83521e-14	0.0155308	0.011	0	5.69886e-10		Atxn1	5.95966e-07	0.181612	0.165	0.074	0.0185065
Mrpl21	2.91278e-80	0.213259	0.534	0.293	9.04506e-76		Prmt7	9.28733e-12	0.144854	0.247	0.11	2.88399e-07		Rpl35	6.16252e-07	0.222256	1	0.925	0.0191365		Mfap1b	7.59847e-40	0.262128	0.163	0.085	2.35955e-35		Rpp21	1.8571e-14	0.129827	0.33	0.188	5.76686e-10		Elf4	6.09495e-07	0.169992	0.252	0.133	0.0189266
Polr3e	3.0306e-80	0.176014	0.183	0.059	9.41091e-76		Slc25a3	9.295e-12	0.188643	0.953	0.839	2.88638e-07		Sigmar1	6.16636e-07	0.23082	0.348	0.148	0.0191484		Hist3h2ba	9.06059e-40	0.148124	0.06	0.011	2.81358e-35		Senp7	1.85854e-14	0.0835241	0.253	0.129	5.77134e-10		Gm10605	6.10898e-07	0.0366015	0.018	0.002	0.0189702
Mrps7	4.92115e-80	0.201185	0.414	0.208	1.52816e-75		Bms1	9.37087e-12	0.166698	0.38	0.195	2.90994e-07		Setd1a	6.17108e-07	0.146912	0.213	0.07	0.0191631		Pnkd	1.07211e-39	0.277783	0.199	0.116	3.32921e-35		Hddc2	1.90894e-14	0.121434	0.286	0.158	5.92783e-10		Mocos	6.11415e-07	0.0394289	0.023	0.003	0.0189863
Mia2	7.36085e-80	0.221456	0.566	0.318	2.28577e-75		Clns1a	9.52529e-12	0.196396	0.546	0.321	2.95789e-07		Farsa	6.34544e-07	0.225214	0.528	0.259	0.0197045		Rasgrp1	1.07392e-39	0.30905	0.407	0.341	3.33486e-35		Rap2b	2.07782e-14	0.117987	0.246	0.129	6.45226e-10		Camk2g	6.1171e-07	0.116754	0.229	0.111	0.0189954
Rbm34	1.11366e-79	0.186077	0.34	0.156	3.45825e-75		Ogfr	9.54849e-12	0.12126	0.437	0.224	2.96509e-07		Slc10a3	6.54396e-07	0.100276	0.146	0.039	0.0203209		Coro1b	1.09054e-39	0.253939	0.163	0.084	3.38644e-35		Mgmt	2.18503e-14	0.0572211	0.068	0.02	6.78518e-10		Dbp	6.24798e-07	0.200279	0.174	0.08	0.0194018
Hnrnpk	1.15282e-79	0.213278	0.948	0.78	3.57984e-75		Bbip1	9.63018e-12	0.178886	0.417	0.222	2.99046e-07		Aimp2	6.70015e-07	0.203392	0.427	0.19	0.020806		Gdpd1	1.2542e-39	0.108307	0.041	0.002	3.89466e-35		Rnf14	2.18702e-14	0.0688533	0.195	0.092	6.79135e-10		Slc35c1	6.31006e-07	0.1293	0.138	0.056	0.0195946
Sde2	1.23261e-79	0.198425	0.444	0.226	3.82763e-75		Nr2c2ap	1.03079e-11	0.127743	0.346	0.168	3.20092e-07		Cox7c	6.75457e-07	0.262412	0.944	0.755	0.020975		Inpp5d	1.79723e-39	0.270766	0.217	0.13	5.58094e-35		Kcnmb4	2.20619e-14	0.0688832	0.06	0.017	6.85088e-10		Lpin1	6.43637e-07	0.142718	0.115	0.043	0.0199869
Camk2d	1.78166e-79	0.331039	0.445	0.251	5.53259e-75		Vac14	1.03161e-11	0.107494	0.153	0.056	3.20345e-07		AU019823	6.78278e-07	0.180982	0.382	0.164	0.0210626		Trappc6b	1.98324e-39	0.325191	0.386	0.34	6.15855e-35		R3hdm4	2.27556e-14	0.100803	0.276	0.147	7.0663e-10		Rpl18a	6.62911e-07	0.112706	1	1	0.0205854
Adipor2	4.23764e-79	0.220002	0.418	0.212	1.31592e-74		Utp3	1.03644e-11	0.210423	0.695	0.436	3.21844e-07		Gbp8	6.93595e-07	0.310018	0.348	0.149	0.0215382		Auh	2.08536e-39	0.24512	0.152	0.075	6.47568e-35		Dlg4	2.28687e-14	0.0993459	0.155	0.069	7.10143e-10		Card19	6.64663e-07	0.155969	0.183	0.085	0.0206398
Jagn1	7.4733e-79	0.198407	0.388	0.189	2.32068e-74		Mrpl36	1.04851e-11	0.197693	0.539	0.316	3.25593e-07		Psmg4	6.94449e-07	0.339667	0.528	0.279	0.0215647		Sf3b2	2.21484e-39	0.274558	0.578	0.595	6.87776e-35		Gm28809	2.34716e-14	0.0315487	0.025	0.003	7.28864e-10		Nipsnap2	6.96521e-07	0.107991	0.124	0.048	0.0216291
Far1	7.64685e-79	0.167747	0.229	0.086	2.37458e-74		Jak2	1.04957e-11	0.242015	0.705	0.456	3.25924e-07		Spout1	7.03186e-07	0.17029	0.292	0.112	0.021836		Atp5l	2.24241e-39	0.213076	0.766	0.842	6.96334e-35		Ptgr2	2.39604e-14	0.0832899	0.146	0.063	7.44043e-10		Ssbp3	7.17347e-07	0.186601	0.257	0.138	0.0222758
Psmb7	1.12515e-78	0.212403	0.509	0.277	3.49391e-74		Spin4	1.09956e-11	0.0127491	0.01	0	3.41446e-07		Sod2	7.08211e-07	0.252007	0.82	0.489	0.0219921		Chd9	2.31467e-39	0.269552	0.179	0.098	7.18776e-35		Glud1	2.49687e-14	0.166356	0.37	0.223	7.75352e-10		Taok1	7.30207e-07	0.150811	0.298	0.16	0.0226751
Kpnb1	1.22727e-78	0.205961	0.485	0.258	3.81103e-74		Lgi2	1.09956e-11	0.00892397	0.01	0	3.41446e-07		Polr3h	7.0825e-07	0.160548	0.315	0.123	0.0219933		E230001N04Rik	2.80233e-39	0.20216	0.102	0.036	8.70207e-35		3830406C13Rik	2.56925e-14	0.110718	0.33	0.185	7.97829e-10		0610012G03Rik	7.33536e-07	0.231668	0.422	0.272	0.0227785
U2af2	1.32613e-78	0.191794	0.438	0.222	4.11805e-74		Ndfip2	1.15915e-11	0.204805	0.512	0.289	3.59951e-07		D1Ertd622e	7.14505e-07	0.27739	0.315	0.13	0.0221875		Fbxo9	3.05772e-39	0.257882	0.167	0.088	9.49515e-35		Mgat5	2.59323e-14	0.120361	0.212	0.107	8.05274e-10		Nedd4l	7.46293e-07	0.0831764	0.055	0.014	0.0231746
Zpr1	1.48415e-78	0.180639	0.329	0.149	4.60873e-74		Jmjd6	1.21622e-11	0.119398	0.441	0.226	3.77672e-07		Luc7l	7.14536e-07	0.260592	0.573	0.3	0.0221885		Haus4	3.12765e-39	0.181439	0.091	0.029	9.71229e-35		Arhgap1	2.71961e-14	0.117583	0.217	0.11	8.44521e-10		Eno1	7.47783e-07	0.262557	0.495	0.346	0.0232209
Cflar	1.56001e-78	0.268732	0.575	0.34	4.84431e-74		Hat1	1.30234e-11	0.161898	0.417	0.22	4.04415e-07		Zdhhc16	7.21486e-07	0.110898	0.202	0.064	0.0224043		Gngt2	3.17252e-39	0.246946	0.153	0.076	9.85161e-35		Lama3	2.75563e-14	0.0104553	0.008	0	8.55705e-10		Midn	7.55121e-07	0.144927	0.257	0.133	0.0234488
Wdr36	2.90568e-78	0.18647	0.236	0.092	9.023e-74		Ube2e1	1.30857e-11	0.175856	0.641	0.382	4.06351e-07		Stat6	7.29449e-07	0.169271	0.427	0.187	0.0226516		Tpst2	3.39954e-39	0.297565	0.407	0.347	1.05566e-34		Ncmap	2.79124e-14	0.00983675	0.008	0	8.66762e-10		Ulk2	7.64007e-07	0.106586	0.124	0.048	0.0237247
Prr7	4.24338e-78	0.170316	0.139	0.037	1.3177e-73		Eif4e2	1.31043e-11	0.164272	0.586	0.337	4.06929e-07		Smn1	7.3429e-07	0.192144	0.472	0.216	0.0228019		Vezf1	3.7226e-39	0.318141	0.246	0.164	1.15598e-34		Vipr1	2.91602e-14	0.0598524	0.063	0.018	9.05512e-10		Ppp1r3f	7.79705e-07	0.051899	0.046	0.01	0.0242122
Pphln1	5.70584e-78	0.144124	0.215	0.078	1.77183e-73		Slc4a7	1.34926e-11	0.201107	0.383	0.2	4.18987e-07		Caprin1	7.51334e-07	0.277455	0.764	0.449	0.0233312		Zyx	3.96243e-39	0.326018	0.263	0.181	1.23045e-34		Fcho1	2.9366e-14	0.100961	0.169	0.078	9.11903e-10		Mtch1	7.79805e-07	0.153994	0.298	0.163	0.0242153
Elac2	1.96049e-77	0.169635	0.191	0.065	6.0879e-73		Rps19bp1	1.36414e-11	0.156716	0.468	0.254	4.23607e-07		Rbm15b	7.86959e-07	0.162565	0.36	0.149	0.0244374		Mef2a	4.65257e-39	0.335796	0.291	0.215	1.44476e-34		Hist1h2bc	2.95377e-14	0.0609863	0.052	0.013	9.17234e-10		Ppt1	8.12672e-07	0.202169	0.298	0.165	0.0252359
Lzic	2.07421e-77	0.169241	0.297	0.129	6.44105e-73		Cyb5b	1.39351e-11	0.179608	0.542	0.314	4.32727e-07		Prkar2a	7.92279e-07	0.206854	0.348	0.145	0.0246026		Gpr34	5.26613e-39	0.187261	0.099	0.034	1.63529e-34		Arhgef12	3.03848e-14	0.0392216	0.029	0.005	9.4354e-10		Pdia4	8.24983e-07	0.235099	0.362	0.221	0.0256182
Dcaf1	2.79508e-77	0.168788	0.241	0.095	8.67955e-73		Hsf1	1.42135e-11	0.102497	0.322	0.153	4.41373e-07		Gm12840	8.01975e-07	0.296744	0.36	0.158	0.0249037		Actr2	6.44226e-39	0.274691	0.579	0.604	2.00052e-34		Rtf2	3.04288e-14	0.142955	0.387	0.236	9.44907e-10		4921511I17Rik	8.75474e-07	0.0192402	0.014	0.001	0.0271861
Bag5	2.91995e-77	0.189157	0.368	0.176	9.06732e-73		Rnps1	1.45171e-11	0.175315	0.447	0.242	4.50798e-07		Etv6	8.03887e-07	0.165522	0.281	0.105	0.0249631		Eva1b	6.67911e-39	0.274044	0.184	0.104	2.07406e-34		Fbxo27	3.21154e-14	0.0944994	0.111	0.043	9.97279e-10		Hadh	8.77293e-07	0.140381	0.239	0.119	0.0272426
Psma6	3.10515e-77	0.231907	0.662	0.407	9.64243e-73		Fastkd3	1.49755e-11	0.109999	0.163	0.062	4.65035e-07		Kctd15	8.16848e-07	0.023655	0.022	0.001	0.0253656		Ppp3ca	7.45095e-39	0.317139	0.32	0.243	2.31374e-34		Nbn	3.34351e-14	0.107805	0.109	0.043	1.03826e-09		Mboat1	8.93032e-07	0.108144	0.106	0.039	0.0277313
Aven	5.3901e-77	0.164229	0.265	0.109	1.67379e-72		Pwp2	1.52151e-11	0.122826	0.241	0.106	4.72474e-07		Hormad2	8.19085e-07	0.025137	0.022	0.001	0.025435		Gm11713	7.7456e-39	0.211139	0.122	0.051	2.40524e-34		Gucy1a1	3.35585e-14	0.0349536	0.017	0.002	1.04209e-09		Cebpzos	8.97374e-07	0.153381	0.248	0.127	0.0278661
Mtrr	5.39809e-77	0.15033	0.146	0.04	1.67627e-72		Lag3	1.64804e-11	0.0408794	0.02	0.002	5.11765e-07		Suco	8.30763e-07	0.207282	0.506	0.233	0.0257977		March2	7.80148e-39	0.280745	0.235	0.152	2.42259e-34		Rit1	3.38785e-14	0.069332	0.155	0.068	1.05203e-09		Atg7	8.98896e-07	0.108581	0.161	0.07	0.0279134
Pdxp	7.86659e-77	0.152253	0.164	0.05	2.44281e-72		Mbd3	1.66951e-11	0.150485	0.539	0.302	5.18434e-07		AC160336.1	8.33327e-07	0.36448	0.652	0.349	0.0258773		Psip1	7.8447e-39	0.336603	0.368	0.306	2.43602e-34		Mindy3	3.51535e-14	0.124597	0.253	0.137	1.09162e-09		Pbxip1	9.05219e-07	0.161163	0.349	0.199	0.0281098
Mettl2	8.42345e-77	0.156967	0.207	0.075	2.61573e-72		Desi1	1.75195e-11	0.124214	0.305	0.145	5.44034e-07		Ddx5	8.4731e-07	0.216386	1	0.975	0.0263115		Trappc6a	9.82645e-39	0.254025	0.198	0.115	3.05141e-34		Scd2	3.55029e-14	0.1017	0.134	0.057	1.10247e-09		Cnppd1	9.18287e-07	0.172991	0.248	0.129	0.0285156
Hmgn1	1.4446e-76	0.243477	0.577	0.341	4.48593e-72		Gata3	1.75713e-11	0.337553	0.607	0.389	5.4564e-07		2900097C17Rik	8.51311e-07	0.213719	0.483	0.22	0.0264358		Ly6g5b	9.91898e-39	0.183459	0.098	0.034	3.08014e-34		Dlgap5	3.59695e-14	0.0661013	0.065	0.019	1.11696e-09		Faap20	9.21354e-07	0.13424	0.252	0.128	0.0286108
Ndufb6	2.43366e-76	0.208464	0.512	0.281	7.55723e-72		Rbbp7	1.85266e-11	0.215549	0.685	0.427	5.75308e-07		Rasgef1b	8.84417e-07	0.0500691	0.034	0.003	0.0274638		Pafah1b1	1.04527e-38	0.298636	0.49	0.477	3.24589e-34		Gpn3	3.59922e-14	0.0929646	0.206	0.101	1.11767e-09		Ankrd13a	9.25217e-07	0.176023	0.307	0.17	0.0287308
Fam185a	4.71008e-76	0.138473	0.133	0.034	1.46262e-71		Camk2d	1.87181e-11	0.27168	0.519	0.313	5.81254e-07		Bop1	9.02521e-07	0.173557	0.382	0.163	0.028026		Trim14	1.09842e-38	0.195626	0.098	0.034	3.41094e-34		Dusp11	3.61047e-14	0.162001	0.579	0.398	1.12116e-09		Cpd	9.49829e-07	0.0603899	0.023	0.003	0.029495
H3f3b	7.43646e-76	0.166673	0.997	0.982	2.30924e-71		Krr1	1.99409e-11	0.168187	0.488	0.276	6.19225e-07		Dusp16	9.0521e-07	0.0597429	0.079	0.014	0.0281095		Lage3	1.28583e-38	0.25774	0.193	0.111	3.99288e-34		Prkdc	3.63006e-14	0.0891091	0.123	0.05	1.12724e-09		Hsd17b10	9.53673e-07	0.176213	0.422	0.262	0.0296144
Mrm3	7.51804e-76	0.143833	0.157	0.046	2.33458e-71		Usp1	2.0408e-11	0.150557	0.441	0.237	6.33731e-07		Tial1	9.05984e-07	0.219714	0.573	0.275	0.0281335		Ly6c2	1.32102e-38	0.649437	0.199	0.114	4.10216e-34		Gm11707	3.69252e-14	0.0651961	0.092	0.033	1.14664e-09		Rnf38	9.67929e-07	0.122872	0.188	0.087	0.0300571
Zswim4	7.91546e-76	0.124354	0.104	0.019	2.45799e-71		Hnrnpa1	2.07199e-11	0.22425	0.912	0.697	6.43414e-07		Fastkd2	9.06446e-07	0.133652	0.213	0.072	0.0281479		Fam78a	1.55152e-38	0.20626	0.117	0.047	4.81795e-34		Nipa1	4.03629e-14	0.0128117	0.006	0	1.25339e-09		AC098883.2	9.90836e-07	0.0657724	0.028	0.004	0.0307684
Atp1b3	8.64377e-76	0.183552	0.577	0.326	2.68415e-71		Pole3	2.14548e-11	0.119118	0.281	0.13	6.66237e-07		Tox2	9.09593e-07	0.0294316	0.034	0.003	0.0282456		Akap8l	1.6781e-38	0.292167	0.198	0.118	5.211e-34		A330093E20Rik	4.03629e-14	0.00958012	0.006	0	1.25339e-09		Traf3ip3	1.01915e-06	0.167741	0.472	0.283	0.0316478
Ttc27	8.67137e-76	0.143033	0.175	0.056	2.69272e-71		Mrfap1	2.18568e-11	0.208883	0.858	0.598	6.78721e-07		Fah	9.13002e-07	0.0337476	0.034	0.003	0.0283514		Inpp5k	2.17191e-38	0.211425	0.118	0.049	6.74444e-34		Nmur1	4.03629e-14	0.00866103	0.006	0	1.25339e-09		Eya2	1.02323e-06	0.0989751	0.11	0.041	0.0317742
Riox2	2.64372e-75	0.180155	0.255	0.106	8.20956e-71		Tmem183a	2.33173e-11	0.119159	0.308	0.148	7.24071e-07		BC003965	9.26126e-07	0.279234	0.517	0.271	0.028759		Trim24	2.53312e-38	0.236272	0.131	0.059	7.8661e-34		Tubb2b	4.03629e-14	0.0085351	0.006	0	1.25339e-09		Cd163l1	1.02336e-06	0.0400903	0.028	0.004	0.0317784
Tnfsf9	3.3528e-75	0.236428	0.112	0.024	1.04115e-70		Utp11	2.44289e-11	0.202048	0.685	0.422	7.58589e-07		Utp11	1.00218e-06	0.272967	0.708	0.427	0.0311208		Jmjd1c	2.80623e-38	0.32268	0.296	0.22	8.71419e-34		Arhgef11	4.05241e-14	0.0308776	0.022	0.003	1.25839e-09		2610001J05Rik	1.02863e-06	0.167619	0.266	0.143	0.031942
Ranbp2	3.36401e-75	0.222991	0.585	0.338	1.04462e-70		Cdc34	2.47583e-11	0.170775	0.403	0.214	7.68818e-07		Stk19	1.01632e-06	0.119655	0.247	0.087	0.0315597		Card19	2.83404e-38	0.217585	0.12	0.051	8.80055e-34		Gpatch11	4.18914e-14	0.0994877	0.232	0.119	1.30085e-09		Cd72	1.04086e-06	0.144651	0.252	0.129	0.0323218
Thoc3	3.93626e-75	0.163977	0.31	0.139	1.22233e-70		Glrx5	2.49156e-11	0.22548	0.729	0.479	7.73705e-07		Acot7	1.029e-06	0.22055	0.449	0.208	0.0319536		Mlycd	3.75034e-38	0.216237	0.117	0.048	1.16459e-33		Snx2	4.25769e-14	0.126334	0.349	0.201	1.32214e-09		Apbb1ip	1.04974e-06	0.187292	0.766	0.593	0.0325976
Neto2	4.21548e-75	0.113089	0.08	0.01	1.30903e-70		Gadd45g	2.60069e-11	0.175439	0.451	0.252	8.07592e-07		Stim2	1.0602e-06	0.179056	0.416	0.185	0.0329224		Anp32a	4.02128e-38	0.276385	0.533	0.524	1.24873e-33		Rundc3a	4.27398e-14	0.0420119	0.028	0.004	1.3272e-09		Fcho2	1.10228e-06	0.148225	0.252	0.131	0.034229
Cad	5.1029e-75	0.143872	0.148	0.042	1.5846e-70		Prpf31	2.63887e-11	0.183364	0.485	0.27	8.19449e-07		Nol6	1.08213e-06	0.158984	0.247	0.09	0.0336033		Gdf11	4.09608e-38	0.213039	0.105	0.04	1.27195e-33		Sept1	4.27723e-14	0.137364	0.857	0.67	1.32821e-09		Dync1i2	1.13031e-06	0.178701	0.372	0.223	0.0350995
Ercc8	5.43036e-75	0.153212	0.17	0.054	1.68629e-70		Ubqln1	2.6947e-11	0.114846	0.39	0.198	8.36785e-07		Tlcd1	1.08897e-06	0.16091	0.27	0.102	0.0338157		N4bp2l1	4.62133e-38	0.20796	0.106	0.04	1.43506e-33		Ndufa7	4.27962e-14	0.148402	0.656	0.46	1.32895e-09		Pex26	1.1794e-06	0.0952622	0.05	0.012	0.036624
Utp11	9.03255e-75	0.215862	0.588	0.345	2.80488e-70		Wars	2.83749e-11	0.118613	0.271	0.125	8.81127e-07		Sik3	1.12798e-06	0.127225	0.348	0.141	0.0350272		Dhrs7	5.7876e-38	0.206935	0.121	0.051	1.79722e-33		Cstb	4.36886e-14	0.113425	0.312	0.175	1.35666e-09		Kbtbd3	1.18617e-06	0.0764505	0.069	0.02	0.0368341
Bst2	9.35455e-75	0.238159	0.574	0.34	2.90487e-70		Purb	2.98067e-11	0.226645	0.895	0.657	9.25586e-07		Ube2g1	1.14961e-06	0.219816	0.539	0.268	0.0356988		Ldah	8.90814e-38	0.260089	0.179	0.1	2.76624e-33		Sept9	4.4008e-14	0.123246	0.515	0.323	1.36658e-09		Itgb3	1.19232e-06	0.148481	0.248	0.126	0.0370252
Mpp7	1.25732e-74	0.182106	0.131	0.033	3.90436e-70		Gars	3.01672e-11	0.143174	0.393	0.202	9.36782e-07		Prep	1.18284e-06	0.174396	0.247	0.091	0.0367309		Calm3	9.22547e-38	0.283547	0.5	0.487	2.86478e-33		Smarca2	4.45903e-14	0.125898	0.257	0.136	1.38466e-09		Mastl	1.19515e-06	0.072806	0.032	0.006	0.037113
Abhd17c	1.26216e-74	0.188005	0.315	0.144	3.9194e-70		Pop7	3.03211e-11	0.134874	0.431	0.227	9.4156e-07		Arf4	1.1944e-06	0.290588	0.944	0.658	0.0370896		Atxn2l	9.35629e-38	0.334556	0.335	0.274	2.90541e-33		Cdkn2c	4.48641e-14	0.0689278	0.129	0.053	1.39317e-09		Rpa1	1.216e-06	0.136737	0.202	0.097	0.0377604
Cyp51	1.46664e-74	0.17025	0.211	0.079	4.55437e-70		Trmt11	3.05668e-11	0.157358	0.251	0.116	9.4919e-07		Nop14	1.22142e-06	0.284605	0.551	0.298	0.0379288		Mfap1a	1.16368e-37	0.258036	0.153	0.079	3.61358e-33		Abhd18	4.63717e-14	0.0966145	0.115	0.046	1.43998e-09		Ncbp3	1.21622e-06	0.184639	0.243	0.128	0.0377673
Tnip2	1.56686e-74	0.134141	0.124	0.03	4.86557e-70		Relb	3.06136e-11	0.174762	0.576	0.333	9.50645e-07		Cars	1.29287e-06	0.149556	0.202	0.068	0.0401476		Mettl7a1	1.19437e-37	0.135911	0.058	0.011	3.70887e-33		Commd7	4.67986e-14	0.10733	0.479	0.288	1.45324e-09		Nipal3	1.2244e-06	0.10303	0.096	0.034	0.0380214
Tubb6	1.86623e-74	0.111291	0.067	0.005	5.79522e-70		Kansl2	3.16104e-11	0.138881	0.322	0.158	9.81597e-07		Vkorc1l1	1.29447e-06	0.176456	0.258	0.096	0.0401971		Ssh1	1.31522e-37	0.187506	0.1	0.037	4.08415e-33		Cap1	5.07086e-14	0.154451	0.527	0.346	1.57465e-09		Lztfl1	1.23672e-06	0.209169	0.353	0.211	0.0384038
Eif4h	2.38356e-74	0.220672	0.637	0.384	7.40166e-70		Dusp5	3.21884e-11	0.227669	0.481	0.284	9.99547e-07		Adss	1.3023e-06	0.322654	0.719	0.44	0.0404404		Stk24	1.66613e-37	0.279699	0.488	0.464	5.17384e-33		Ctla2a	5.12702e-14	0.340606	0.478	0.333	1.59209e-09		Svbp	1.24064e-06	0.177574	0.381	0.23	0.0385257
Ythdf1	3.291e-74	0.168947	0.355	0.169	1.02195e-69		Prpf19	3.30695e-11	0.174267	0.468	0.262	1.02691e-06		Dynll1	1.32341e-06	0.305831	0.91	0.663	0.041096		Trappc8	1.87752e-37	0.255562	0.162	0.086	5.83028e-33		Washc3	5.20704e-14	0.135365	0.26	0.14	1.61694e-09		Dusp23	1.24639e-06	0.0699106	0.069	0.02	0.0387041
Nfat5	4.12906e-74	0.235081	0.395	0.203	1.2822e-69		Hras	3.41874e-11	0.181034	0.454	0.251	1.06162e-06		Eny2	1.35517e-06	0.275508	0.787	0.453	0.0420822		Rnf14	2.13962e-37	0.232977	0.132	0.062	6.64418e-33		Dynlrb1	5.20881e-14	0.132382	0.558	0.363	1.61749e-09		Myo3b	1.2478e-06	0.0394559	0.018	0.002	0.0387479
Ywhae	8.45051e-74	0.22298	0.657	0.398	2.62414e-69		Xbp1	3.4775e-11	0.203652	0.58	0.349	1.07987e-06		Smim7	1.39831e-06	0.145724	0.472	0.212	0.0434219		Kctd2	2.68475e-37	0.222837	0.136	0.064	8.33696e-33		Dscr3	5.22314e-14	0.0942308	0.138	0.059	1.62194e-09		Nicn1	1.25665e-06	0.0354222	0.018	0.002	0.0390228
Atp5g1	8.81843e-74	0.245711	0.843	0.611	2.73839e-69		Bccip	3.58046e-11	0.182738	0.607	0.369	1.11184e-06		Jak2	1.42436e-06	0.404641	0.73	0.461	0.0442307		Ddx6	2.86345e-37	0.306879	0.476	0.455	8.89187e-33		Cers4	6.06301e-14	0.125867	0.247	0.131	1.88275e-09		Cap1	1.28131e-06	0.199478	0.518	0.354	0.0397886
Colgalt1	1.15467e-73	0.176918	0.217	0.083	3.5856e-69		Ftl1	3.59164e-11	0.175567	0.993	0.946	1.11531e-06		Vmp1	1.4394e-06	0.285069	0.584	0.312	0.0446978		Uvssa	2.91784e-37	0.213382	0.108	0.043	9.06076e-33		Dpysl2	6.34113e-14	0.0938975	0.177	0.084	1.96911e-09		Slc25a11	1.28781e-06	0.18102	0.408	0.25	0.0399903
Ttc39b	1.20112e-73	0.187525	0.341	0.162	3.72983e-69		Ubqln4	3.76036e-11	0.116378	0.207	0.088	1.16771e-06		Sec22b	1.46298e-06	0.169277	0.539	0.256	0.0454301		Rdm1	3.69843e-37	0.197292	0.112	0.045	1.14847e-32		Rnf5	6.94311e-14	0.110957	0.203	0.101	2.15604e-09		Lage3	1.30809e-06	0.197459	0.275	0.151	0.04062
Tmem238	1.22029e-73	0.175797	0.195	0.07	3.78938e-69		Txnrd3	3.86599e-11	0.129759	0.173	0.069	1.20051e-06		Ubqln4	1.46353e-06	0.13961	0.247	0.09	0.0454471		Slain1	3.85336e-37	0.211276	0.126	0.056	1.19658e-32		Rida	6.94375e-14	0.0535085	0.091	0.032	2.15624e-09		Hmgn5	1.30996e-06	0.12526	0.17	0.078	0.0406783
Cystm1	1.76764e-73	0.0965437	0.061	0.003	5.48906e-69		Rad23b	3.90137e-11	0.178949	0.569	0.331	1.21149e-06		Dusp12	1.48344e-06	0.124975	0.281	0.106	0.0460654		Zfp68	4.65152e-37	0.256706	0.163	0.087	1.44444e-32		Cdadc1	6.97673e-14	0.0850508	0.097	0.036	2.16648e-09		Trip12	1.31637e-06	0.190521	0.486	0.322	0.0408773
Tmed10	1.94639e-73	0.218212	0.69	0.428	6.04412e-69		Snhg6	4.29042e-11	0.139928	0.353	0.178	1.3323e-06		Sap30	1.48843e-06	0.135497	0.236	0.084	0.0462201		Prkag1	5.23248e-37	0.231771	0.145	0.072	1.62484e-32		Dnajc4	7.12093e-14	0.0782188	0.183	0.087	2.21126e-09		Mitd1	1.31929e-06	0.174565	0.326	0.186	0.0409679
Ddx1	2.17407e-73	0.1767	0.29	0.129	6.75113e-69		Nupl2	4.29453e-11	0.0521065	0.071	0.017	1.33358e-06		Eif3l	1.51546e-06	0.250216	0.697	0.388	0.0470597		Map4k2	6.93307e-37	0.238266	0.159	0.083	2.15293e-32		Fuca2	7.17624e-14	0.0827132	0.157	0.07	2.22844e-09		Cab39l	1.32002e-06	0.125305	0.174	0.08	0.0409905
Pycrl	2.88691e-73	0.159989	0.202	0.074	8.96472e-69		Epcam	4.32596e-11	0.128248	0.186	0.077	1.34334e-06		Gsdme	1.53762e-06	0.193417	0.258	0.099	0.0477476		Mkrn1	9.44908e-37	0.32187	0.357	0.303	2.93422e-32		Ar	7.31566e-14	0.0779408	0.068	0.021	2.27173e-09		Oma1	1.32061e-06	0.105013	0.106	0.039	0.0410088
Mrps30	4.33887e-73	0.168331	0.333	0.156	1.34735e-68		Fam206a	4.43295e-11	0.0953991	0.156	0.059	1.37656e-06		Phf23	1.54578e-06	0.168528	0.371	0.16	0.0480012		Commd4	9.99248e-37	0.292791	0.249	0.171	3.10297e-32		Zfp101	7.58881e-14	0.0543277	0.074	0.024	2.35655e-09		Akirin1	1.32118e-06	0.208994	0.459	0.305	0.0410265
Prep	4.95836e-73	0.150395	0.166	0.054	1.53972e-68		Gm16286	4.59709e-11	0.197533	0.756	0.477	1.42754e-06		Ptcd3	1.55657e-06	0.201276	0.393	0.175	0.0483361		Dennd2d	1.05592e-36	0.232591	0.122	0.054	3.27894e-32		Cd4	8.00328e-14	0.0897136	0.232	0.119	2.48526e-09		Xpa	1.33339e-06	0.134609	0.261	0.136	0.0414057
Sept7	5.11916e-73	0.235239	0.894	0.706	1.58965e-68		Ncs1	4.66174e-11	0.101475	0.115	0.038	1.44761e-06		Jag1	1.58821e-06	0.0620265	0.045	0.006	0.0493187		Itga2	1.0822e-36	0.13883	0.054	0.009	3.36055e-32		Atxn10	8.48374e-14	0.146846	0.369	0.221	2.63445e-09		Mpc2	1.35895e-06	0.19406	0.509	0.341	0.0421994
Ppig	5.52712e-73	0.219309	0.745	0.485	1.71634e-68		Tet2	5.17815e-11	0.144794	0.363	0.188	1.60797e-06		Dusp5	1.5956e-06	0.182774	0.573	0.287	0.0495482		Zmym5	1.12222e-36	0.308795	0.217	0.139	3.48482e-32		Bckdhb	9.01766e-14	0.0505269	0.037	0.008	2.80025e-09		Rtn4rl1	1.36072e-06	0.09907	0.092	0.032	0.0422544
Bloc1s4	5.79536e-73	0.157055	0.302	0.135	1.79963e-68		Nudt19	5.22668e-11	0.137214	0.363	0.184	1.62304e-06		Fam207a	1.6015e-06	0.177084	0.427	0.191	0.0497315		Mark2	1.12811e-36	0.325773	0.311	0.241	3.50313e-32		Arid4a	9.73865e-14	0.149415	0.484	0.309	3.02414e-09		Kcnab2	1.38075e-06	0.116137	0.142	0.06	0.0428764
Ptprs	5.84254e-73	0.143251	0.117	0.027	1.81429e-68		Spag9	5.30398e-11	0.184672	0.488	0.283	1.64705e-06		Timm17a	1.61601e-06	0.253755	0.787	0.457	0.050182		Rere	1.16385e-36	0.182471	0.095	0.034	3.6141e-32		N6amt1	9.76192e-14	0.120255	0.212	0.108	3.03137e-09		Coro7	1.43254e-06	0.138245	0.17	0.077	0.0444848
Cse1l	6.6251e-73	0.159716	0.208	0.078	2.05729e-68		Psmc4	5.54809e-11	0.192995	0.675	0.43	1.72285e-06		Arl5b	1.63468e-06	0.187712	0.303	0.123	0.0507618		Sptbn1	1.21941e-36	0.287712	0.268	0.186	3.78663e-32		Atox1	9.99782e-14	0.15411	0.47	0.301	3.10462e-09		Mrps16	1.45658e-06	0.188243	0.463	0.301	0.045231
Itgav	6.76899e-73	0.233237	0.232	0.094	2.10198e-68		Suv39h1	5.60627e-11	0.0740893	0.098	0.029	1.74092e-06		Nadk	1.64175e-06	0.22099	0.393	0.182	0.0509813		Cetn2	1.22652e-36	0.304739	0.303	0.232	3.80871e-32		Narf	1.01157e-13	0.0766725	0.106	0.041	3.14123e-09		Clint1	1.45785e-06	0.248938	0.624	0.491	0.0452707
Bdp1	9.35527e-73	0.197764	0.427	0.225	2.90509e-68		D8Ertd738e	6.20974e-11	0.210566	0.898	0.651	1.92831e-06		Hif1a	1.67103e-06	0.24863	0.697	0.398	0.0518906		Hmg20a	1.2925e-36	0.23358	0.14	0.068	4.01359e-32		Dpm3	1.12023e-13	0.137742	0.341	0.201	3.47865e-09		Cat	1.47039e-06	0.110268	0.138	0.057	0.04566
Myo10	1.83292e-72	0.108654	0.08	0.01	5.69175e-68		Eloc	6.33458e-11	0.20472	0.736	0.489	1.96708e-06		Lars	1.70941e-06	0.172959	0.438	0.198	0.0530824		Spop	1.2969e-36	0.322136	0.321	0.255	4.02726e-32		Cox14	1.13775e-13	0.160141	0.47	0.303	3.53305e-09		Cuta	1.47067e-06	0.200306	0.408	0.253	0.0456688
Riok2	1.91913e-72	0.156074	0.225	0.088	5.95946e-68		Acod1	6.39438e-11	0.0387062	0.014	0.001	1.98565e-06		Rrp1	1.70967e-06	0.274573	0.854	0.536	0.0530904		Zrsr1	1.42782e-36	0.178695	0.083	0.026	4.43381e-32		Ly6e	1.16229e-13	0.135484	0.995	0.93	3.60925e-09		Ndufa6	1.47457e-06	0.238584	0.661	0.525	0.0457899
Gmppb	2.267e-72	0.161108	0.217	0.083	7.03972e-68		Rpp25	6.40967e-11	0.0188955	0.014	0.001	1.99039e-06		Mrpl54	1.7133e-06	0.218214	0.607	0.311	0.0532032		Rac1	1.51264e-36	0.283471	0.51	0.508	4.69719e-32		Acadl	1.2407e-13	0.113894	0.243	0.128	3.85275e-09		Mbnl1	1.48594e-06	0.119396	0.968	0.83	0.0461428
Mbd3	2.4047e-72	0.188684	0.446	0.236	7.46732e-68		Pcgf6	6.45494e-11	0.135191	0.214	0.094	2.00445e-06		Eif4g1	1.73692e-06	0.239799	0.809	0.449	0.0539365		Tmem229b	1.53925e-36	0.213656	0.128	0.058	4.77984e-32		Ndufb5	1.2542e-13	0.177485	0.78	0.627	3.89465e-09		Rd3	1.50281e-06	0.0468249	0.028	0.004	0.0466666
Chpf	3.21855e-72	0.152518	0.173	0.057	9.99458e-68		Gm47283	6.56345e-11	0.205836	0.668	0.416	2.03815e-06		Foxn2	1.73785e-06	0.179816	0.449	0.208	0.0539654		Virma	1.68496e-36	0.300377	0.244	0.165	5.23229e-32		Zfp995	1.28885e-13	0.0525123	0.048	0.012	4.00227e-09		Pcbd2	1.50463e-06	0.163869	0.248	0.13	0.0467232
Gzmb	3.56728e-72	1.11061	0.127	0.033	1.10775e-67		Tbrg4	6.56952e-11	0.104363	0.227	0.099	2.04003e-06		Rabggtb	1.74657e-06	0.209286	0.427	0.202	0.0542361		Akr1c13	1.73366e-36	0.180962	0.097	0.035	5.38353e-32		Lrwd1	1.34099e-13	0.10178	0.175	0.084	4.16419e-09		Rtn4	1.52593e-06	0.228789	0.344	0.212	0.0473847
Mb21d1	4.33254e-72	0.172646	0.184	0.064	1.34538e-67		Sptb	6.59596e-11	0.01438	0.014	0.001	2.04824e-06		Ipo4	1.75689e-06	0.192042	0.247	0.095	0.0545567		Zfp740	1.86504e-36	0.266587	0.183	0.106	5.7915e-32		BC003331	1.42043e-13	0.0915918	0.123	0.052	4.41087e-09		Cnr2	1.57906e-06	0.119874	0.138	0.058	0.0490344
Slc5a6	1.05483e-71	0.125719	0.118	0.028	3.27558e-67		Gemin5	6.62315e-11	0.139716	0.292	0.142	2.05669e-06		Slc35a4	1.77158e-06	0.182671	0.36	0.155	0.055013		Dedd2	2.16161e-36	0.217453	0.131	0.061	6.71245e-32		Rbms1	1.44233e-13	0.119211	0.449	0.273	4.47888e-09		Fbxo3	1.58853e-06	0.139926	0.188	0.089	0.0493286
Jund	1.30045e-71	0.296813	0.952	0.866	4.03828e-67		S100a4	6.66777e-11	0.132715	0.227	0.1	2.07054e-06		Arih1	1.77731e-06	0.225185	0.551	0.278	0.0551908		Fkbp8	2.35844e-36	0.314229	0.349	0.293	7.32366e-32		Ergic3	1.49306e-13	0.105038	0.284	0.156	4.63641e-09		Abhd14a	1.59734e-06	0.111412	0.087	0.03	0.0496022
Coa7	1.69208e-71	0.136188	0.153	0.047	5.2544e-67		Eif4g1	6.78328e-11	0.197434	0.692	0.445	2.10641e-06		Tuba1b	1.78085e-06	0.283613	0.674	0.375	0.0553006		Rock1	2.66669e-36	0.278261	0.598	0.625	8.28088e-32		Polg2	1.53527e-13	0.0864414	0.095	0.036	4.76746e-09		Btrc	1.61745e-06	0.0956915	0.106	0.039	0.0502267
Osbpl8	2.21668e-71	0.192466	0.314	0.147	6.88347e-67		Ubxn4	6.83308e-11	0.204518	0.688	0.442	2.12188e-06		Rpl41	1.80398e-06	0.172858	1	0.985	0.0560189		Tcrg-C2	3.01435e-36	0.300224	0.201	0.115	9.36047e-32		Napg	1.54409e-13	0.110243	0.238	0.125	4.79486e-09		Abhd14b	1.62308e-06	0.0488831	0.046	0.011	0.0504016
Fam83g	2.38763e-71	0.115868	0.07	0.007	7.41431e-67		Srrd	6.9931e-11	0.099525	0.149	0.056	2.17157e-06		B230307C23Rik	1.81947e-06	0.166755	0.371	0.16	0.0565001		Cast	3.63857e-36	0.305665	0.307	0.228	1.12988e-31		Rb1	1.54874e-13	0.110398	0.134	0.059	4.80929e-09		Emc9	1.66789e-06	0.103155	0.092	0.032	0.0517929
Aasdhppt	2.56097e-71	0.171192	0.305	0.141	7.95258e-67		Aebp2	7.21809e-11	0.197967	0.634	0.39	2.24143e-06		Snrpb	1.82649e-06	0.248408	0.978	0.784	0.0567179		Hes6	3.79611e-36	0.231697	0.139	0.068	1.17881e-31		Serpinb6a	1.59437e-13	0.073451	0.104	0.04	4.95101e-09		Syne1	1.69236e-06	0.109923	0.17	0.076	0.0525529
Ado	2.74819e-71	0.153764	0.296	0.132	8.53397e-67		Usp50	7.2204e-11	0.10738	0.19	0.079	2.24215e-06		Rangrf	1.8795e-06	0.131642	0.225	0.079	0.0583641		Trim30a	3.79767e-36	0.291154	0.264	0.181	1.17929e-31		Zfp329	1.6392e-13	0.102062	0.227	0.118	5.09021e-09		Trim14	1.69825e-06	0.126065	0.151	0.066	0.0527357
Rnps1	3.19196e-71	0.184984	0.368	0.184	9.91201e-67		Glmn	7.2484e-11	0.0847747	0.237	0.105	2.25085e-06		Dhx15	1.89919e-06	0.239629	0.73	0.398	0.0589757		Mitd1	3.84607e-36	0.288333	0.226	0.147	1.19432e-31		Nit2	1.76326e-13	0.0904176	0.184	0.09	5.47545e-09		Ube4b	1.7114e-06	0.114868	0.156	0.069	0.053144
Dctd	6.21186e-71	0.127745	0.108	0.024	1.92897e-66		Ube2f	7.6597e-11	0.158376	0.454	0.252	2.37857e-06		Zfp827	1.90054e-06	0.0838121	0.191	0.061	0.0590174		2610035D17Rik	3.92065e-36	0.149065	0.066	0.016	1.21748e-31		Tcrg-C1	1.88218e-13	0.130292	0.238	0.127	5.84473e-09		Ermp1	1.71191e-06	0.087895	0.115	0.044	0.05316
Gfm1	1.18801e-70	0.141686	0.21	0.08	3.68914e-66		Cxcl3	7.71706e-11	0.0441137	0.007	0	2.39638e-06		Sla	1.91163e-06	0.697149	0.697	0.46	0.0593619		Bcap31	4.00443e-36	0.264194	0.587	0.618	1.2435e-31		Slc25a24	1.90109e-13	0.0823757	0.06	0.018	5.90346e-09		Gata3	1.71214e-06	0.191438	0.578	0.391	0.0531671
Rnf157	1.28231e-70	0.164114	0.19	0.068	3.98197e-66		Cnksr1	7.71706e-11	0.00844007	0.007	0	2.39638e-06		Qtrt2	1.91732e-06	0.171275	0.247	0.093	0.0595386		Cd96	4.39344e-36	0.266588	0.22	0.138	1.3643e-31		Cnga1	1.97226e-13	0.040955	0.034	0.007	6.12445e-09		Retreg2	1.71642e-06	0.1525	0.22	0.111	0.0533
Trim27	1.3434e-70	0.171017	0.446	0.234	4.17165e-66		Shisa3	7.78764e-11	0.0148928	0.007	0	2.4183e-06		Nop10	1.92898e-06	0.254033	0.955	0.688	0.0599005		Rrm2b	4.47873e-36	0.206518	0.111	0.046	1.39078e-31		Sp110	1.98596e-13	0.119572	0.436	0.263	6.16699e-09		Mospd2	1.82052e-06	0.0972488	0.078	0.025	0.0565326
Atp11a	2.72423e-70	0.145699	0.148	0.044	8.45954e-66		Tcf15	7.78764e-11	0.0148258	0.007	0	2.4183e-06		Ret	1.92899e-06	0.0360178	0.022	0.002	0.059901		Cebpzos	5.24436e-36	0.256285	0.165	0.09	1.62853e-31		Bphl	2.13025e-13	0.0699823	0.126	0.053	6.61508e-09		Zbtb4	1.82523e-06	0.168219	0.206	0.102	0.056679
Nudt4	3.111e-70	0.18817	0.328	0.156	9.66058e-66		Lhx2	7.78764e-11	0.00770756	0.007	0	2.4183e-06		Mrpl32	2.00026e-06	0.255578	0.674	0.382	0.0621142		Ngly1	5.33911e-36	0.249054	0.157	0.083	1.65795e-31		Sh3kbp1	2.17739e-13	0.13696	0.567	0.377	6.76145e-09		Dera	1.85027e-06	0.15758	0.229	0.119	0.0574564
Tfdp1	5.08802e-70	0.158729	0.224	0.09	1.57998e-65		1700061F12Rik	7.78764e-11	0.00754675	0.007	0	2.4183e-06		Fen1	2.01099e-06	0.0933652	0.236	0.083	0.0624473		Fam168a	5.87018e-36	0.180961	0.085	0.028	1.82287e-31		Lage3	2.21169e-13	0.092602	0.27	0.146	6.86797e-09		Gtf3a	1.85081e-06	0.202651	0.312	0.183	0.0574733
Tspan5	9.65326e-70	0.143793	0.192	0.069	2.99763e-65		Gm4353	7.78764e-11	0.00754262	0.007	0	2.4183e-06		Elac2	2.03509e-06	0.128499	0.281	0.108	0.0631958		Zadh2	6.24548e-36	0.207226	0.107	0.043	1.93941e-31		Edem2	2.42519e-13	0.100305	0.172	0.082	7.53094e-09		Pfn4	1.85566e-06	0.0142998	0.009	0.001	0.0576237
Ccdc137	1.06314e-69	0.133441	0.138	0.039	3.30136e-65		Cox7a2	7.93658e-11	0.198109	0.915	0.693	2.46454e-06		Mtrr	2.12649e-06	0.173507	0.213	0.076	0.066034		H1f0	7.06025e-36	0.213759	0.101	0.039	2.19242e-31		mt-Nd5	2.44806e-13	0.137451	0.96	0.886	7.60195e-09		Slain2	1.85823e-06	0.184971	0.261	0.144	0.0577036
Gtf2e2	1.51166e-69	0.154838	0.265	0.115	4.69416e-65		Vapa	8.02858e-11	0.216235	0.793	0.558	2.49311e-06		Matn2	2.13769e-06	0.0368537	0.034	0.003	0.0663818		Zmat1	7.21731e-36	0.139345	0.058	0.012	2.24119e-31		Erg28	2.54104e-13	0.10591	0.389	0.232	7.8907e-09		B9d1	1.86044e-06	0.0158011	0.009	0.001	0.0577724
Cldnd1	1.83581e-69	0.139426	0.263	0.112	5.70075e-65		Gpn1	8.31725e-11	0.130022	0.342	0.175	2.58275e-06		Gm20186	2.20978e-06	0.159155	0.157	0.047	0.0686202		Nxpe3	7.26934e-36	0.252588	0.177	0.1	2.25735e-31		Ctsc	2.68563e-13	0.137217	0.316	0.188	8.33968e-09		Grk3	1.86044e-06	0.0136342	0.009	0.001	0.0577724
Nek8	1.95098e-69	0.119552	0.087	0.015	6.05837e-65		Plk2	8.37128e-11	0.125287	0.064	0.015	2.59953e-06		Wdr61	2.20984e-06	0.242157	0.573	0.309	0.0686221		Galnt6	7.40249e-36	0.264847	0.174	0.098	2.29869e-31		Sp140	2.72174e-13	0.0876118	0.189	0.092	8.45182e-09		Cpeb3	1.86524e-06	0.0106876	0.009	0.001	0.0579214
Bola2	2.25873e-69	0.183767	0.501	0.275	7.01405e-65		Prag1	8.39395e-11	0.101723	0.166	0.065	2.60657e-06		Larp1	2.23781e-06	0.263125	0.787	0.449	0.0694908		Zmynd11	9.90099e-36	0.313103	0.24	0.165	3.07455e-31		Dnajc3	2.75716e-13	0.169857	0.762	0.578	8.56181e-09		Prrg1	1.86983e-06	0.0478595	0.046	0.011	0.0580639
Polr2l	2.94652e-69	0.142033	0.191	0.069	9.14984e-65		Twistnb	8.77713e-11	0.210091	0.736	0.476	2.72556e-06		Kpna3	2.34807e-06	0.233054	0.382	0.179	0.0729145		Mkl1	1.01619e-35	0.190031	0.101	0.039	3.15558e-31		Tnni1	2.89354e-13	0.0122541	0.009	0	8.98532e-09		Sdhaf4	1.87342e-06	0.148021	0.275	0.148	0.0581753
Stx11	3.22704e-69	0.176324	0.205	0.079	1.00209e-64		Agfg1	9.05687e-11	0.253061	0.678	0.425	2.81243e-06		Camsap1	2.41748e-06	0.159702	0.191	0.064	0.07507		Taok3	1.2237e-35	0.300092	0.24	0.162	3.79997e-31		Snx6	2.91977e-13	0.113519	0.389	0.232	9.06677e-09		4930550C14Rik	1.87488e-06	0.0106907	0.009	0.001	0.0582205
Qdpr	3.43363e-69	0.178451	0.333	0.16	1.06624e-64		Tuba1c	9.59789e-11	0.182222	0.356	0.19	2.98043e-06		Elavl1	2.44181e-06	0.231346	0.764	0.441	0.0758254		Gm35363	1.3459e-35	0.154393	0.071	0.019	4.17943e-31		Hint3	2.92597e-13	0.0950192	0.281	0.154	9.08603e-09		Zscan29	1.87592e-06	0.0996458	0.128	0.053	0.0582529
Hypk	4.66954e-69	0.176201	0.408	0.212	1.45003e-64		Pgrmc2	9.8628e-11	0.124329	0.261	0.121	3.06269e-06		Nme1	2.46824e-06	0.253304	0.978	0.754	0.0766462		Ppm1k	1.52574e-35	0.21087	0.111	0.046	4.73789e-31		Dennd2c	2.93463e-13	0.018787	0.009	0	9.11291e-09		Mcur1	1.88612e-06	0.185215	0.243	0.134	0.0585697
P4ha1	7.53861e-69	0.141031	0.173	0.059	2.34097e-64		Tnfaip8	1.02268e-10	0.240645	0.797	0.566	3.17573e-06		Gm26668	2.47752e-06	0.0644474	0.045	0.006	0.0769343		Gm5547	1.93244e-35	0.1854	0.096	0.035	6.0008e-31		Kctd12b	2.94055e-13	0.022169	0.009	0	9.13128e-09		Tubgcp2	1.92873e-06	0.11637	0.128	0.053	0.0598928
Syngr2	7.6908e-69	0.234417	0.35	0.176	2.38823e-64		Per1	1.05068e-10	0.0929436	0.176	0.071	3.26267e-06		Kpna2	2.49369e-06	0.101982	0.157	0.047	0.0774365		Tpcn1	2.05286e-35	0.168098	0.078	0.024	6.37474e-31		Gm15200	2.9883e-13	0.0127531	0.009	0	9.27956e-09		Rcbtb1	1.94645e-06	0.110115	0.106	0.04	0.0604432
Orc2	1.40275e-68	0.15393	0.235	0.097	4.35597e-64		Rrp7a	1.09383e-10	0.161278	0.464	0.258	3.39667e-06		Srfbp1	2.6197e-06	0.176915	0.281	0.113	0.0813495		Creb1	2.07765e-35	0.335616	0.245	0.169	6.45173e-31		Galnt6	2.99388e-13	0.095909	0.246	0.13	9.29691e-09		Tprgl	1.97576e-06	0.202225	0.518	0.348	0.0613531
Hars	2.61503e-68	0.167973	0.33	0.159	8.12045e-64		Kpna1	1.14653e-10	0.12035	0.359	0.183	3.56033e-06		Alg11	2.63843e-06	0.114666	0.236	0.085	0.0819312		Acaa1a	2.35901e-35	0.233398	0.155	0.082	7.32543e-31		Tbc1d1	3.15929e-13	0.112607	0.389	0.228	9.81055e-09		Ndufa10	1.97717e-06	0.182824	0.537	0.369	0.0613971
Snx5	3.70947e-68	0.198715	0.52	0.298	1.1519e-63		Kdm6bos	1.31161e-10	0.0730535	0.092	0.027	4.07295e-06		Phc2	2.6602e-06	0.18139	0.393	0.177	0.0826071		Efr3a	2.43766e-35	0.327975	0.302	0.234	7.56967e-31		Slc22a15	3.26268e-13	0.0607589	0.065	0.02	1.01316e-08		Gm16124	1.99208e-06	0.084434	0.106	0.039	0.0618599
Tial1	5.63874e-68	0.167738	0.404	0.21	1.751e-63		Rgs10	1.35385e-10	0.0917823	0.4	0.206	4.20412e-06		Pou2f2	2.67365e-06	0.449963	0.427	0.227	0.083025		Nudt13	2.7916e-35	0.154907	0.071	0.019	8.66875e-31		Ankrd13a	3.27937e-13	0.10746	0.295	0.165	1.01834e-08		Slc9a3r1	2.00253e-06	0.195251	0.5	0.334	0.0621847
Usp39	5.8019e-68	0.151878	0.257	0.111	1.80166e-63		Mfsd14a	1.39683e-10	0.14837	0.536	0.302	4.33759e-06		Sde2	2.69207e-06	0.181304	0.596	0.299	0.0835968		Gm19585	3.01713e-35	0.285191	0.243	0.163	9.36911e-31		Gabrr2	3.36929e-13	0.0260877	0.022	0.003	1.04626e-08		Zfp386	2.03444e-06	0.114951	0.151	0.066	0.0631753
Pmepa1	6.34557e-68	0.132512	0.119	0.03	1.97049e-63		Gbp7	1.4057e-10	0.344053	0.546	0.339	4.36513e-06		Amd1	2.7228e-06	0.210344	0.416	0.194	0.084551		Lonp2	3.17271e-35	0.264671	0.201	0.123	9.85221e-31		Mvd	3.49758e-13	0.0593064	0.1	0.038	1.0861e-08		Fech	2.05005e-06	0.112363	0.078	0.025	0.0636602
Nup62	7.92437e-68	0.160585	0.229	0.094	2.46076e-63		Tpm3	1.41438e-10	0.221414	0.885	0.707	4.39208e-06		Eef1g	2.79578e-06	0.223943	1	0.931	0.0868173		Irf1	3.3828e-35	0.210067	0.477	0.406	1.05046e-30		Plxnc1	3.56382e-13	0.0564239	0.134	0.058	1.10667e-08		Tmem127	2.10173e-06	0.135625	0.188	0.091	0.0652651
Gde1	8.54681e-68	0.16682	0.301	0.141	2.65404e-63		Lrrc58	1.41474e-10	0.119093	0.397	0.208	4.3932e-06		Cd2ap	2.83516e-06	0.120365	0.292	0.115	0.0880401		Rpl34	3.44321e-35	0.0878603	0.998	0.999	1.06922e-30		Fam222b	3.97757e-13	0.0831175	0.101	0.04	1.23516e-08		Trp53i13	2.12209e-06	0.0800633	0.073	0.023	0.0658972
Ube2o	1.45458e-67	0.126589	0.141	0.041	4.51691e-63		Eif3m	1.46417e-10	0.196112	0.942	0.784	4.54669e-06		Tex30	2.84261e-06	0.190186	0.371	0.166	0.0882716		Tex9	4.98461e-35	0.132964	0.054	0.01	1.54787e-30		Slc48a1	3.9907e-13	0.0754691	0.106	0.042	1.23923e-08		Cox14	2.12527e-06	0.183439	0.463	0.311	0.0659959
Tmem65	1.49514e-67	0.146872	0.162	0.054	4.64287e-63		Simc1	1.49784e-10	0.106094	0.163	0.063	4.65124e-06		Spryd4	2.92045e-06	0.104216	0.18	0.057	0.0906889		Rex1bd	5.03334e-35	0.298614	0.368	0.316	1.563e-30		Zbtb7b	4.14977e-13	0.0789638	0.209	0.106	1.28863e-08		Dynlrb1	2.12796e-06	0.222988	0.528	0.372	0.0660797
Abt1	1.7671e-67	0.143112	0.299	0.136	5.48737e-63		Ndufa12	1.50361e-10	0.188042	0.749	0.495	4.66915e-06		Clock	3.02496e-06	0.109267	0.258	0.096	0.0939342		Ssh2	6.32089e-35	0.245727	0.168	0.092	1.96283e-30		Mbnl3	4.22037e-13	0.0807336	0.094	0.035	1.31055e-08		Kdm4a	2.12802e-06	0.0977214	0.119	0.047	0.0660814
Atad1	2.28349e-67	0.163176	0.348	0.172	7.09093e-63		Abracl	1.74451e-10	0.225292	0.925	0.764	5.41724e-06		Ndufab1	3.0516e-06	0.279986	0.843	0.557	0.0947612		Sf3b1	7.38375e-35	0.216098	0.726	0.791	2.29288e-30		Ssh1	4.5833e-13	0.0817933	0.144	0.065	1.42325e-08		Gdi1	2.15689e-06	0.12444	0.165	0.075	0.0669778
Psat1	2.90301e-67	0.140351	0.15	0.047	9.01472e-63		Soat1	1.81355e-10	0.0953009	0.19	0.079	5.63162e-06		Ddx3x	3.05921e-06	0.253784	0.73	0.42	0.0949977		Shkbp1	8.13516e-35	0.203831	0.12	0.054	2.52621e-30		Abca7	4.5863e-13	0.0754382	0.117	0.048	1.42418e-08		Cep57	2.17701e-06	0.173167	0.261	0.142	0.0676027
Cfdp1	2.98474e-67	0.19239	0.508	0.289	9.26852e-63		Dynll1	1.81423e-10	0.250228	0.831	0.66	5.63372e-06		Perp	3.09269e-06	0.13575	0.09	0.02	0.0960372		Tmem128	9.6271e-35	0.306609	0.387	0.346	2.9895e-30		Tbcb	4.60087e-13	0.096883	0.387	0.228	1.42871e-08		Cdc14b	2.20398e-06	0.0757821	0.041	0.009	0.0684403
Fam208b	3.53434e-67	0.194631	0.419	0.223	1.09752e-62		Prmt6	1.9637e-10	0.135997	0.22	0.1	6.09788e-06		mt-Nd1	3.15876e-06	0.16907	1	0.996	0.0980889		Tor4a	1.26464e-34	0.156547	0.074	0.022	3.9271e-30		Ap1b1	4.65849e-13	0.0846576	0.172	0.083	1.4466e-08		Slc48a1	2.27432e-06	0.0962308	0.115	0.045	0.0706246
Nop9	5.87712e-67	0.149216	0.241	0.102	1.82502e-62		Ccdc58	1.9644e-10	0.112724	0.244	0.113	6.10005e-06		Plcb4	3.17573e-06	0.0845708	0.124	0.032	0.0986159		S100a13	1.5612e-34	0.262544	0.382	0.317	4.84798e-30		Ift27	4.82306e-13	0.0998683	0.201	0.102	1.4977e-08		Mecp2	2.29327e-06	0.163645	0.294	0.163	0.0712131
Homer1	8.60316e-67	0.133509	0.141	0.042	2.67154e-62		Orc2	1.9863e-10	0.119893	0.288	0.141	6.16806e-06		Phb2	3.34247e-06	0.320121	0.831	0.57	0.103794		Zfhx2	1.7073e-34	0.209347	0.121	0.054	5.30169e-30		Map4	5.09538e-13	0.0771565	0.158	0.074	1.58227e-08		Crkl	2.3136e-06	0.151707	0.188	0.091	0.0718441
Usp16	1.07646e-66	0.176158	0.377	0.193	3.34272e-62		Usp10	2.00801e-10	0.139946	0.329	0.169	6.23547e-06		Ddx10	3.37806e-06	0.257162	0.663	0.381	0.104899		1700027F09Rik	1.72144e-34	0.109988	0.044	0.005	5.34558e-30		Gm5141	5.24458e-13	0.0375056	0.035	0.007	1.6286e-08		Dopey1	2.32329e-06	0.15568	0.188	0.091	0.0721451
Cdk6	2.41002e-66	0.170832	0.147	0.047	7.48383e-62		Ttc27	2.04248e-10	0.106069	0.214	0.094	6.3425e-06		Glrx3	3.47415e-06	0.272966	0.809	0.495	0.107883		Zfp950	1.80577e-34	0.291083	0.217	0.14	5.60746e-30		Ccnd3	5.50228e-13	0.111148	0.687	0.461	1.70862e-08		Apoa2	2.35915e-06	0.027595	0.018	0.002	0.0732585
Abhd11	2.50565e-66	0.142816	0.193	0.073	7.78079e-62		Oxsr1	2.08515e-10	0.113265	0.207	0.091	6.47503e-06		Aqr	3.47797e-06	0.144682	0.551	0.261	0.108001		Syne1	1.8095e-34	0.196415	0.108	0.045	5.61904e-30		1300002E11Rik	5.64764e-13	0.0778461	0.195	0.097	1.75376e-08		Vars2	2.3644e-06	0.0795402	0.064	0.019	0.0734216
Per1	6.1239e-66	0.134766	0.137	0.04	1.90166e-61		Ints14	2.18278e-10	0.0857471	0.176	0.071	6.77818e-06		Tm2d3	3.50103e-06	0.170397	0.596	0.287	0.108717		Fundc1	2.01408e-34	0.222696	0.136	0.068	6.25433e-30		Tpp1	5.65775e-13	0.0926586	0.151	0.069	1.7569e-08		Pafah1b1	2.38862e-06	0.232764	0.624	0.481	0.0741738
Nrip1	6.43128e-66	0.348819	0.53	0.339	1.99711e-61		Ap1s3	2.20338e-10	0.111901	0.159	0.063	6.84216e-06		Zswim4	3.51684e-06	0.11206	0.157	0.048	0.109208		Abhd17a	2.10428e-34	0.295637	0.339	0.278	6.53441e-30		Serinc3	5.88679e-13	0.132568	0.753	0.539	1.82802e-08		Atp2a3	2.4123e-06	0.114674	0.193	0.093	0.0749091
Gpat4	7.69557e-66	0.138785	0.197	0.074	2.3897e-61		Slc25a22	2.24599e-10	0.0696909	0.163	0.063	6.97447e-06		Rcc2	3.5792e-06	0.25029	0.775	0.434	0.111145		Nlk	2.12706e-34	0.29192	0.21	0.134	6.60515e-30		Psmd8	6.02509e-13	0.171226	0.608	0.441	1.87097e-08		Hey1	2.41449e-06	0.0240798	0.014	0.001	0.0749772
Ubqln4	8.14929e-66	0.122973	0.161	0.054	2.5306e-61		Pomp	2.33241e-10	0.211938	0.895	0.71	7.24284e-06		Lsm7	3.60164e-06	0.158149	0.607	0.297	0.111842		Ypel5	2.17364e-34	0.212907	0.123	0.057	6.74981e-30		Epn1	6.60399e-13	0.110804	0.232	0.125	2.05074e-08		D17H6S53E	2.41692e-06	0.123098	0.119	0.048	0.0750526
Ddx49	8.88273e-66	0.158257	0.253	0.112	2.75835e-61		Tmem165	2.40881e-10	0.140542	0.447	0.248	7.48006e-06		Dnajc21	3.68931e-06	0.214761	0.652	0.358	0.114564		Cfap36	2.29451e-34	0.207401	0.121	0.055	7.12513e-30		Lztfl1	6.82537e-13	0.168078	0.338	0.206	2.11948e-08		Lpcat2	2.42292e-06	0.0247737	0.014	0.001	0.0752389
Chd7	1.06907e-65	0.217325	0.412	0.222	3.31979e-61		Gtf2f1	2.42958e-10	0.144786	0.359	0.19	7.54457e-06		Sdf2	3.70762e-06	0.240015	0.551	0.285	0.115133		Trim26	2.39064e-34	0.279037	0.206	0.13	7.42364e-30		Terf2ip	7.09747e-13	0.0720022	0.154	0.071	2.20398e-08		Rala	2.42593e-06	0.178879	0.303	0.176	0.0753324
Nt5dc3	1.10752e-65	0.106919	0.09	0.017	3.43918e-61		Tmem11	2.43945e-10	0.117041	0.403	0.212	7.57523e-06		Gzmc	3.71924e-06	0.548323	0.056	0.009	0.115494		Rpl13	3.25542e-34	0.0634461	1	1	1.01091e-29		Mrpl18	7.2851e-13	0.165663	0.611	0.434	2.26224e-08		Fau	2.42645e-06	0.0928293	1	1	0.0753486
Camta1	1.18287e-65	0.135607	0.245	0.103	3.67316e-61		Tspan5	2.46587e-10	0.108243	0.237	0.108	7.65728e-06		Ssr3	3.71969e-06	0.216767	0.551	0.282	0.115508		Tm6sf1	3.6202e-34	0.256678	0.184	0.108	1.12418e-29		Mad2l1bp	7.30405e-13	0.0760946	0.132	0.058	2.26813e-08		Rpl32	2.43271e-06	0.10022	1	1	0.0755429
Ptp4a1	1.76234e-65	0.16475	0.335	0.164	5.47261e-61		Dph2	2.50596e-10	0.079749	0.166	0.066	7.78175e-06		Ubr4	3.77606e-06	0.121663	0.337	0.14	0.117258		Pttg1	3.82867e-34	0.271535	0.21	0.134	1.18892e-29		Smim15	7.36802e-13	0.114751	0.336	0.198	2.28799e-08		Cox4i1	2.52015e-06	0.14564	0.959	0.944	0.0782582
Pdxk	2.13432e-65	0.122751	0.144	0.044	6.62772e-61		Taf1a	2.5244e-10	0.0778265	0.119	0.041	7.83903e-06		Bloc1s4	3.81074e-06	0.184061	0.416	0.191	0.118335		Son	4.72141e-34	0.215079	0.704	0.777	1.46614e-29		Tnfrsf25	7.38927e-13	0.164329	0.547	0.378	2.29459e-08		Trappc11	2.55112e-06	0.103951	0.124	0.05	0.0792198
Shq1	2.77486e-65	0.126435	0.127	0.036	8.61677e-61		Nup153	2.66001e-10	0.120775	0.447	0.243	8.26013e-06		Lonrf1	3.82535e-06	0.0904604	0.101	0.024	0.118789		Ndufaf3	5.59443e-34	0.228627	0.149	0.078	1.73724e-29		Ankrd29	7.4287e-13	0.0222227	0.015	0.001	2.30684e-08		Serf2	2.58119e-06	0.146404	0.963	0.939	0.0801537
Nsfl1c	2.94449e-65	0.171277	0.409	0.217	9.14353e-61		Ramp1	2.73129e-10	0.228291	0.556	0.339	8.48149e-06		Smndc1	3.85203e-06	0.166546	0.573	0.283	0.119617		Tlr12	6.67826e-34	0.102793	0.039	0.003	2.0738e-29		Rtraf	7.49736e-13	0.163058	0.767	0.611	2.32816e-08		Reep5	2.64317e-06	0.239794	0.417	0.28	0.0820785
Ciapin1	4.13073e-65	0.149283	0.3	0.141	1.28272e-60		Ppp1r3e	2.82814e-10	0.0654735	0.095	0.029	8.78222e-06		Wdr3	4.00098e-06	0.218373	0.438	0.219	0.124242		Zfp260	9.81149e-34	0.202072	0.108	0.046	3.04676e-29		Acvrl1	7.7676e-13	0.0203135	0.015	0.001	2.41207e-08		Atp5c1	2.64321e-06	0.185591	0.757	0.623	0.0820797
Sla	5.39297e-65	0.484656	0.572	0.403	1.67468e-60		Gbp6	2.85381e-10	0.132715	0.129	0.047	8.86193e-06		Dcaf1	4.0296e-06	0.154117	0.337	0.144	0.125131		Grina	1.00458e-33	0.225541	0.132	0.065	3.11954e-29		Dnajb14	7.83301e-13	0.0637137	0.054	0.015	2.43238e-08		Cnnm2	2.64393e-06	0.0578917	0.05	0.013	0.0821019
Nat10	7.68248e-65	0.161601	0.216	0.089	2.38564e-60		Slc7a6os	2.8602e-10	0.0896316	0.329	0.163	8.88178e-06		Smyd5	4.07026e-06	0.162919	0.326	0.139	0.126394		Sorbs1	1.02268e-33	0.135912	0.059	0.013	3.17572e-29		Sun2	7.91065e-13	0.0992325	0.332	0.191	2.45649e-08		Pet100	2.64558e-06	0.166916	0.216	0.111	0.0821533
Psmg4	8.73621e-65	0.158943	0.408	0.213	2.71285e-60		Cldnd1	2.9001e-10	0.121831	0.319	0.16	9.00568e-06		Cdkn2b	4.07665e-06	0.0446986	0.022	0.002	0.126592		Ep300	1.09283e-33	0.300087	0.252	0.18	3.39357e-29		Capns1	7.92183e-13	0.129502	0.518	0.335	2.45996e-08		Zfp84	2.65851e-06	0.166139	0.17	0.082	0.0825546
Ppp1r16b	1.07039e-64	0.228564	0.49	0.287	3.3239e-60		Mthfd1	2.96249e-10	0.132842	0.281	0.138	9.19943e-06		Api5	4.0881e-06	0.24404	0.562	0.297	0.126948		Gnpda2	1.21019e-33	0.254655	0.167	0.095	3.758e-29		Gm5547	8.40552e-13	0.0594786	0.14	0.062	2.61017e-08		Nt5c	2.66363e-06	0.198419	0.587	0.421	0.0827137
Bccip	1.33202e-64	0.183997	0.522	0.297	4.13632e-60		Adpgk	2.96523e-10	0.121901	0.237	0.11	9.20794e-06		Tgm2	4.12629e-06	0.0288113	0.022	0.002	0.128134		Ankrd13a	1.29463e-33	0.269062	0.209	0.134	4.02021e-29		Ldlrap1	9.08551e-13	0.0643316	0.061	0.019	2.82132e-08		Bik	2.68115e-06	0.125454	0.156	0.071	0.0832579
Tra2b	1.55511e-64	0.204476	0.799	0.551	4.82907e-60		Uqcrq	3.08659e-10	0.230923	0.79	0.551	9.5848e-06		Jazf1	4.13629e-06	0.0292187	0.022	0.002	0.128444		Pcbd2	1.46755e-33	0.234504	0.168	0.094	4.55718e-29		Fopnl	9.95219e-13	0.0969227	0.23	0.122	3.09045e-08		Nr2c2	2.68245e-06	0.136697	0.284	0.156	0.0832982
Ampd2	1.89387e-64	0.127846	0.137	0.042	5.88102e-60		Mrpl16	3.11391e-10	0.159769	0.407	0.225	9.66962e-06		Dph3	4.22813e-06	0.221871	0.64	0.34	0.131296		Cep350	1.5336e-33	0.283225	0.211	0.137	4.7623e-29		Inpp5d	9.96477e-13	0.0919255	0.298	0.167	3.09436e-08		Tbc1d5	2.68748e-06	0.105565	0.138	0.058	0.0834542
Emc8	1.95712e-64	0.152324	0.304	0.145	6.07745e-60		Prmt5	3.16439e-10	0.0978872	0.254	0.118	9.82639e-06		Mrpl3	4.23263e-06	0.182901	0.472	0.228	0.131436		Zfp287	2.17009e-33	0.124853	0.051	0.01	6.73877e-29		Prkcz	1.08462e-12	0.0876014	0.157	0.074	3.36807e-08		Eps15	2.76243e-06	0.177777	0.248	0.135	0.0857818
Pfas	2.82409e-64	0.13073	0.121	0.033	8.76963e-60		Traf1	3.21558e-10	0.301924	0.512	0.317	9.98533e-06		Pip5k1a	4.32298e-06	0.100407	0.371	0.157	0.134241		Aip	2.60076e-33	0.29425	0.225	0.152	8.07614e-29		Abcg3	1.08784e-12	0.0678782	0.144	0.065	3.37806e-08		Plekho2	2.78681e-06	0.114936	0.156	0.07	0.0865388
Tsr2	4.30015e-64	0.131874	0.182	0.067	1.33533e-59		Bst2	3.28224e-10	0.231443	0.637	0.415	1.01924e-05		Npat	4.36356e-06	0.120173	0.202	0.07	0.135502		Slc2a8	2.92329e-33	0.128439	0.056	0.012	9.07768e-29		AC149090.1	1.09719e-12	0.0859507	0.33	0.19	3.40712e-08		Acot9	2.79575e-06	0.11292	0.138	0.059	0.0868164
Acsl4	7.94954e-64	0.157164	0.208	0.084	2.46857e-59		Cox11	3.32432e-10	0.100981	0.207	0.091	1.0323e-05		Pomp	4.36833e-06	0.259531	0.921	0.714	0.13565		Arf5	3.08967e-33	0.18022	0.704	0.745	9.59435e-29		Fam8a1	1.12378e-12	0.101394	0.19	0.096	3.48968e-08		Ccr10	2.80976e-06	0.115783	0.028	0.005	0.0872513
Cdk2ap1	9.78629e-64	0.152856	0.313	0.151	3.03894e-59		Lgals3	3.51228e-10	0.30345	0.122	0.044	1.09067e-05		1600012H06Rik	4.45357e-06	0.103711	0.247	0.092	0.138297		Cbx6	3.44347e-33	0.204528	0.117	0.053	1.0693e-28		Mettl23	1.12863e-12	0.169442	0.661	0.488	3.50475e-08		Plekhf1	2.81326e-06	0.092389	0.092	0.032	0.0873601
Mrps2	1.02094e-63	0.119777	0.138	0.042	3.17033e-59		Mydgf	3.6151e-10	0.174644	0.58	0.35	1.1226e-05		Idi1	4.46317e-06	0.307143	0.225	0.085	0.138595		Trim34a	3.60861e-33	0.172708	0.09	0.033	1.12058e-28		Akap13	1.16601e-12	0.121192	0.667	0.462	3.62082e-08		Akr1a1	2.81759e-06	0.237099	0.472	0.326	0.0874948
Cst7	1.61492e-63	0.178696	0.269	0.124	5.0148e-59		Tnfsf14	3.65584e-10	0.230533	0.634	0.404	1.13525e-05		Tdg	4.53473e-06	0.139746	0.292	0.118	0.140817		Map4k4	3.6223e-33	0.291678	0.337	0.272	1.12483e-28		Ski	1.16993e-12	0.121308	0.246	0.137	3.63299e-08		Rexo5	2.87953e-06	0.111159	0.119	0.048	0.089418
Srsf1	1.74438e-63	0.182105	0.523	0.303	5.41683e-59		Gtf3c2	3.82951e-10	0.109258	0.254	0.12	1.18918e-05		1110038F14Rik	4.59536e-06	0.15739	0.449	0.207	0.1427		Mecp2	4.64421e-33	0.286389	0.2	0.127	1.44217e-28		Selenof	1.20595e-12	0.160989	0.768	0.593	3.74484e-08		Lyrm2	2.95857e-06	0.151008	0.216	0.111	0.0918725
Ahsa2	2.89958e-63	0.151947	0.31	0.15	9.00407e-59		Cenpv	3.84102e-10	0.0976078	0.18	0.075	1.19275e-05		Nup155	4.61887e-06	0.12213	0.18	0.059	0.14343		Tspyl4	4.64529e-33	0.141627	0.063	0.016	1.4425e-28		Pdcl3	1.24468e-12	0.118914	0.399	0.247	3.86511e-08		Ddhd2	2.98779e-06	0.136279	0.193	0.095	0.0927797
Psmd1	5.38129e-63	0.15866	0.335	0.168	1.67105e-58		Yars2	3.8975e-10	0.118616	0.268	0.13	1.21029e-05		Ndrg1	4.74143e-06	0.0634659	0.056	0.009	0.147236		Cenpx	5.01721e-33	0.290778	0.326	0.261	1.55799e-28		Bcat2	1.25221e-12	0.0800913	0.137	0.062	3.88848e-08		Oard1	3.00074e-06	0.101653	0.257	0.133	0.0931819
Naca	5.82701e-63	0.135494	0.996	0.979	1.80946e-58		Mia2	3.93248e-10	0.156213	0.654	0.397	1.22115e-05		Hras	4.76766e-06	0.216534	0.506	0.255	0.14805		D3Ertd751e	5.55959e-33	0.144563	0.061	0.015	1.72642e-28		Ighm	1.27865e-12	0.0786889	0.555	0.347	3.97061e-08		Ano10	3.03762e-06	0.0911762	0.087	0.03	0.0943271
Car12	7.2369e-63	0.099812	0.066	0.008	2.24727e-58		Prpf3	3.94334e-10	0.0735757	0.214	0.093	1.22453e-05		Btg3	4.77417e-06	0.145618	0.528	0.258	0.148252		Ubac2	5.57285e-33	0.288943	0.307	0.242	1.73054e-28		Ubr7	1.30337e-12	0.0773289	0.123	0.053	4.04734e-08		Phactr2	3.04095e-06	0.167732	0.151	0.07	0.0944306
Gps1	8.2574e-63	0.175607	0.383	0.202	2.56417e-58		Zfp930	4.01706e-10	0.0680481	0.136	0.05	1.24742e-05		Gm10053	4.83604e-06	0.110729	0.135	0.039	0.150173		Smim20	5.70003e-33	0.256255	0.184	0.111	1.77003e-28		Hadha	1.35984e-12	0.123907	0.347	0.209	4.22271e-08		Stx16	3.06743e-06	0.206533	0.381	0.239	0.095253
Fos	9.16505e-63	0.409752	0.244	0.113	2.84602e-58		Abcc1	4.04933e-10	0.122709	0.292	0.144	1.25744e-05		Tmem70	4.97518e-06	0.207929	0.371	0.171	0.154494		Stx17	5.96747e-33	0.169308	0.083	0.029	1.85308e-28		Nabp2	1.37936e-12	0.0744997	0.214	0.11	4.28331e-08		Pcca	3.08681e-06	0.119035	0.147	0.065	0.0958548
Ufm1	1.04264e-62	0.1674	0.431	0.235	3.2377e-58		Slc39a6	4.07686e-10	0.112623	0.329	0.167	1.26599e-05		Chtf8	5.04405e-06	0.121552	0.315	0.13	0.156633		Rasa1	6.00753e-33	0.298043	0.275	0.204	1.86552e-28		Gnpda2	1.38958e-12	0.0898042	0.237	0.126	4.31506e-08		Synj2	3.12627e-06	0.0920323	0.064	0.019	0.0970802
Fastkd3	1.38936e-62	0.114765	0.122	0.034	4.31439e-58		Vps37a	4.07975e-10	0.126714	0.322	0.166	1.26688e-05		Pmepa1	5.17115e-06	0.132022	0.18	0.06	0.16058		Krt83	6.2556e-33	0.158885	0.072	0.022	1.94255e-28		Surf1	1.45222e-12	0.0806134	0.221	0.116	4.50959e-08		Cbx3	3.15032e-06	0.188274	0.601	0.427	0.0978269
Mcrip2	1.64028e-62	0.125262	0.102	0.024	5.09356e-58		Tbkbp1	4.14762e-10	0.0783171	0.122	0.043	1.28796e-05		Thoc3	5.18039e-06	0.152841	0.427	0.196	0.160867		Mical1	6.79831e-33	0.187715	0.111	0.048	2.11108e-28		Polr3c	1.47196e-12	0.105042	0.184	0.093	4.57087e-08		Lrrcc1	3.15106e-06	0.1081	0.17	0.078	0.0978499
Ier3	2.41229e-62	0.544265	0.125	0.037	7.49088e-58		Leo1	4.4711e-10	0.114031	0.346	0.179	1.38841e-05		Ccdc115	5.22162e-06	0.212104	0.494	0.248	0.162147		Pnisr	6.97973e-33	0.279121	0.541	0.561	2.16742e-28		Ypel3	1.52103e-12	0.0876658	0.436	0.258	4.72326e-08		Ankrd54	3.1661e-06	0.10917	0.197	0.095	0.098317
Cdk7	4.12803e-62	0.147445	0.279	0.13	1.28188e-57		Atf6b	4.72892e-10	0.114227	0.264	0.127	1.46847e-05		Huwe1	5.24009e-06	0.205176	0.663	0.357	0.162721		Rps27rt	7.24983e-33	0.294474	0.426	0.405	2.25129e-28		Tsc22d4	1.53049e-12	0.101512	0.542	0.345	4.75263e-08		Cfap36	3.20513e-06	0.123219	0.183	0.088	0.0995288
Sap30	6.46989e-62	0.127507	0.15	0.05	2.0091e-57		Mcoln3	4.89313e-10	0.00990042	0.01	0	1.51946e-05		Ube2n	5.25574e-06	0.246921	0.775	0.466	0.163206		Nckap1l	8.2996e-33	0.252239	0.183	0.11	2.57728e-28		Elk4	1.56031e-12	0.133141	0.359	0.221	4.84522e-08		Mlh3	3.28342e-06	0.0964555	0.11	0.043	0.10196
Pknox1	7.68745e-62	0.147107	0.237	0.103	2.38718e-57		Cdkn1a	4.8995e-10	0.13494	0.081	0.024	1.52144e-05		mt-Nd3	5.27943e-06	0.210573	0.989	0.919	0.163942		Fuca2	8.84456e-33	0.188682	0.105	0.044	2.7465e-28		Slc25a45	1.589e-12	0.0509146	0.091	0.034	4.93433e-08		Angel2	3.30258e-06	0.163458	0.275	0.152	0.102555
Hacd2	1.71842e-61	0.135819	0.227	0.097	5.33622e-57		Dohh	5.00733e-10	0.12939	0.386	0.208	1.55493e-05		Ruvbl1	5.2924e-06	0.255258	0.618	0.352	0.164345		Ufc1	9.07981e-33	0.284431	0.362	0.315	2.81955e-28		Wdr1	1.58901e-12	0.147776	0.473	0.311	4.93435e-08		Eif3h	3.30762e-06	0.192724	0.89	0.835	0.102712
Sf1	1.72467e-61	0.170868	0.453	0.251	5.3556e-57		Nop9	5.04201e-10	0.112711	0.295	0.146	1.56569e-05		Rffl	5.30363e-06	0.125758	0.135	0.039	0.164694		Ppm1h	9.08414e-33	0.258606	0.184	0.111	2.8209e-28		Swap70	1.59743e-12	0.104615	0.141	0.066	4.96049e-08		Myl10	3.35439e-06	0.0666055	0.046	0.011	0.104164
Gm17322	2.05924e-61	0.0848454	0.051	0.003	6.39455e-57		Ddx5	5.09547e-10	0.144974	0.997	0.975	1.5823e-05		Tmem109	5.30987e-06	0.130178	0.247	0.094	0.164888		Tia1	9.60034e-33	0.305429	0.246	0.174	2.98119e-28		Susd1	1.6334e-12	0.0246207	0.025	0.004	5.0722e-08		Rps12	3.38171e-06	0.109258	1	0.999	0.105012
Gls	2.3394e-61	0.192824	0.608	0.371	7.26454e-57		Exosc3	5.12458e-10	0.151208	0.637	0.382	1.59134e-05		Vps29	5.36687e-06	0.198376	0.685	0.356	0.166658		Unc5cl	9.75009e-33	0.135441	0.057	0.013	3.02769e-28		Keap1	1.6348e-12	0.121969	0.255	0.142	5.07656e-08		Rps24	3.40759e-06	0.0776078	1	1	0.105816
9130401M01Rik	2.68193e-61	0.156242	0.285	0.137	8.32818e-57		Golt1b	5.56455e-10	0.103385	0.292	0.143	1.72796e-05		Cdc16	5.46669e-06	0.125313	0.27	0.106	0.169757		Fam174a	1.0095e-32	0.256434	0.181	0.109	3.13481e-28		Ift20	1.66775e-12	0.119298	0.508	0.331	5.17888e-08		Cnpy2	3.44411e-06	0.151808	0.408	0.251	0.10695
Rcc1l	2.96588e-61	0.123577	0.136	0.042	9.20993e-57		Gfm1	5.72551e-10	0.138179	0.251	0.121	1.77794e-05		Cdc73	5.5606e-06	0.159206	0.438	0.204	0.172673		Ganc	1.0129e-32	0.176489	0.085	0.03	3.14537e-28		Pole2	1.67408e-12	0.0576685	0.046	0.012	5.19851e-08		Rlf	3.45247e-06	0.186577	0.349	0.214	0.10721
Erf	3.29236e-61	0.126287	0.122	0.035	1.02238e-56		Hacd2	5.74178e-10	0.109931	0.281	0.138	1.78299e-05		Il17d	5.63096e-06	0.0179246	0.011	0	0.174858		Ccdc125	1.08267e-32	0.141183	0.061	0.015	3.36201e-28		Mpnd	1.74965e-12	0.0815774	0.157	0.074	5.43319e-08		Lsm10	3.45788e-06	0.155112	0.193	0.096	0.107378
Ap1ar	3.71575e-61	0.139037	0.251	0.112	1.15385e-56		Srpk1	5.93242e-10	0.187384	0.81	0.572	1.84219e-05		Ildr1	5.65652e-06	0.0187695	0.011	0	0.175652		Plekha2	1.1775e-32	0.225208	0.14	0.072	3.65649e-28		Sash3	1.77889e-12	0.0785193	0.329	0.186	5.52399e-08		Zfp580	3.51469e-06	0.0508352	0.037	0.008	0.109142
Insig1	4.22768e-61	0.128809	0.167	0.059	1.31282e-56		Cnih1	6.00774e-10	0.113767	0.431	0.233	1.86558e-05		Maged1	5.65652e-06	0.0148759	0.011	0	0.175652		Tmem63a	1.48555e-32	0.13892	0.064	0.017	4.61307e-28		Fam129a	1.80899e-12	0.138263	0.363	0.227	5.61746e-08		Chmp5	3.5736e-06	0.167575	0.372	0.229	0.110971
Pde12	5.62432e-61	0.144023	0.238	0.106	1.74652e-56		Snx3	6.18882e-10	0.194874	0.695	0.46	1.92182e-05		Cbr3	5.68219e-06	0.0264042	0.011	0	0.176449		Mdp1	1.66238e-32	0.285777	0.279	0.21	5.16218e-28		Sit1	1.81675e-12	0.0810739	0.212	0.109	5.64154e-08		Ddb2	3.61604e-06	0.100503	0.128	0.054	0.112289
Dynll2	6.1038e-61	0.156867	0.443	0.242	1.89541e-56		Ola1	6.23583e-10	0.163098	0.631	0.383	1.93641e-05		Ldhal6b	5.68219e-06	0.0141795	0.011	0	0.176449		Lpcat4	1.80021e-32	0.210389	0.122	0.058	5.59019e-28		Vps41	1.94967e-12	0.0933025	0.187	0.094	6.05431e-08		Ssu72	3.69773e-06	0.184654	0.583	0.417	0.114825
Cd83	6.67347e-61	0.177117	0.092	0.02	2.07231e-56		H3f3b	6.34925e-10	0.14098	0.993	0.987	1.97163e-05		Esrp2	5.70797e-06	0.0136715	0.011	0	0.17725		Slc44a2	1.87922e-32	0.271748	0.218	0.144	5.83553e-28		Dynlt1f	1.94978e-12	0.0679377	0.108	0.044	6.05467e-08		Vamp4	3.78431e-06	0.164916	0.266	0.145	0.117514
Xpo6	8.05135e-61	0.162538	0.348	0.179	2.50019e-56		Gm12840	6.47629e-10	0.28931	0.292	0.156	2.01108e-05		Acot4	5.70797e-06	0.0109455	0.011	0	0.17725		Baz2b	1.9734e-32	0.175918	0.082	0.028	6.12799e-28		Rbck1	1.99173e-12	0.134057	0.401	0.253	6.18492e-08		Klf10	3.81296e-06	0.0743111	0.078	0.026	0.118404
3010003L21Rik	1.29704e-60	0.135233	0.161	0.057	4.0277e-56		Alg5	6.48374e-10	0.129879	0.532	0.303	2.01339e-05		Trav6-4	5.73386e-06	0.0104519	0.011	0	0.178054		Pxk	2.29173e-32	0.214243	0.127	0.062	7.11651e-28		Ndufb11	2.047e-12	0.123933	0.808	0.634	6.35655e-08		Gm36745	3.85738e-06	0.0117619	0.005	0	0.119783
Rbm15b	1.4754e-60	0.154438	0.236	0.104	4.58155e-56		Armc6	6.70444e-10	0.0668501	0.078	0.022	2.08193e-05		Gm28592	5.73386e-06	0.0075667	0.011	0	0.178054		Dcaf15	2.31045e-32	0.227197	0.139	0.072	7.17465e-28		Ubn1	2.11056e-12	0.137298	0.441	0.284	6.55392e-08		Zfhx3	3.85738e-06	0.0111262	0.005	0	0.119783
Leo1	2.09898e-60	0.143118	0.28	0.133	6.51795e-56		Cabin1	6.73285e-10	0.127316	0.386	0.208	2.09075e-05		Gm28535	5.73386e-06	0.00753591	0.011	0	0.178054		Ten1	2.49634e-32	0.239652	0.181	0.108	7.75188e-28		Klf3	2.1524e-12	0.125378	0.518	0.327	6.68385e-08		Upp1	3.85738e-06	0.0110597	0.005	0	0.119783
Bud23	3.14979e-60	0.151618	0.336	0.171	9.78105e-56		Abt1	6.7926e-10	0.112888	0.359	0.188	2.1093e-05		Psmd1	5.85872e-06	0.230819	0.449	0.224	0.181931		Zfp467	2.70549e-32	0.163469	0.078	0.026	8.40136e-28		Ndufb9	2.23863e-12	0.147337	0.739	0.568	6.95162e-08		Lhfp	3.85738e-06	0.00915548	0.005	0	0.119783
Elp5	3.22038e-60	0.139535	0.205	0.084	1.00002e-55		Stim2	6.84061e-10	0.106968	0.353	0.182	2.12421e-05		Ube2l3	5.92117e-06	0.263721	0.91	0.599	0.18387		Lbr	2.89086e-32	0.297717	0.346	0.289	8.97698e-28		Tanc1	2.27357e-12	0.0561855	0.069	0.023	7.06011e-08		Trav6-2	3.85738e-06	0.00762952	0.005	0	0.119783
Ada	3.71639e-60	0.229288	0.169	0.063	1.15405e-55		Ube2a	6.97539e-10	0.1843	0.59	0.362	2.16607e-05		Eef1b2	5.97917e-06	0.16556	1	0.992	0.185671		Pdk1	3.39207e-32	0.247005	0.163	0.093	1.05334e-27		Rmdn1	2.29782e-12	0.0472538	0.078	0.028	7.13541e-08		Mlana	3.85738e-06	0.00708135	0.005	0	0.119783
B930036N10Rik	5.29173e-60	0.152502	0.224	0.096	1.64324e-55		Ube2j2	7.02975e-10	0.16148	0.566	0.343	2.18295e-05		2810004N23Rik	6.00009e-06	0.170268	0.438	0.206	0.186321		Nosip	3.97952e-32	0.205189	0.122	0.058	1.23576e-27		Mknk2	2.32963e-12	0.0982228	0.356	0.212	7.2342e-08		Ntn4	3.87547e-06	0.00593093	0.005	0	0.120345
Fh1	7.70752e-60	0.161121	0.29	0.141	2.39342e-55		Fam133b	7.19552e-10	0.144142	0.546	0.318	2.23442e-05		Lzic	6.05174e-06	0.154179	0.404	0.186	0.187925		Ankrd12	4.57036e-32	0.283189	0.434	0.376	1.41923e-27		Ap3s1	2.36133e-12	0.140928	0.418	0.268	7.33263e-08		Exd1	3.87547e-06	0.00568392	0.005	0	0.120345
Tbl1x	7.91033e-60	0.178046	0.444	0.253	2.45639e-55		Sbno1	7.32096e-10	0.190137	0.786	0.521	2.27338e-05		Prag1	6.11481e-06	0.173586	0.191	0.067	0.189883		Wnt10a	4.8818e-32	0.100956	0.037	0.003	1.51595e-27		Itpa	2.45741e-12	0.102832	0.217	0.116	7.63101e-08		Osbpl6	3.87547e-06	0.00547824	0.005	0	0.120345
Srpk1	7.95047e-60	0.204754	0.734	0.495	2.46886e-55		Cd2ap	7.37946e-10	0.108902	0.241	0.113	2.29154e-05		Simc1	6.18079e-06	0.120282	0.191	0.065	0.191932		Lrrcc1	5.0616e-32	0.202447	0.109	0.048	1.57178e-27		Trpc4ap	2.47574e-12	0.127025	0.369	0.223	7.68791e-08		Gm15938	3.87547e-06	0.00541298	0.005	0	0.120345
Gorasp2	9.22791e-60	0.138939	0.26	0.12	2.86554e-55		Hnrnpm	7.39319e-10	0.17428	0.78	0.528	2.29581e-05		Rbmxl1	6.18805e-06	0.216768	0.596	0.316	0.192158		Lmo4	5.6329e-32	0.0399281	0.417	0.311	1.74918e-27		Mtch1	2.53558e-12	0.105707	0.278	0.159	7.87373e-08		Chd9	3.8779e-06	0.168659	0.257	0.138	0.12042
Foxp4	1.05574e-59	0.132294	0.176	0.067	3.27839e-55		Slc5a6	7.58928e-10	0.0938175	0.146	0.057	2.3567e-05		P2ry2	6.21134e-06	0.0443173	0.034	0.004	0.192881		Abhd18	6.18334e-32	0.15712	0.075	0.024	1.92011e-27		Naxe	2.5627e-12	0.0877714	0.19	0.096	7.95795e-08		Rara	3.93948e-06	0.18341	0.161	0.077	0.122333
Hivep3	1.4064e-59	0.182549	0.218	0.094	4.3673e-55		Prpf40a	7.6529e-10	0.194128	0.78	0.528	2.37646e-05		Rgs10	6.32201e-06	0.115296	0.461	0.21	0.196317		Ap3m2	6.20634e-32	0.135669	0.063	0.017	1.92725e-27		Ttc9c	2.5847e-12	0.0687675	0.166	0.08	8.02626e-08		Ifngr2	3.9457e-06	0.0762794	0.05	0.013	0.122526
Slc25a37	1.57742e-59	0.13632	0.215	0.09	4.89837e-55		Pogk	7.96645e-10	0.128968	0.227	0.106	2.47382e-05		Prkrip1	6.34276e-06	0.142783	0.315	0.132	0.196962		Ehmt2	6.66314e-32	0.193059	0.116	0.053	2.06911e-27		Tnrc6c	2.62438e-12	0.120424	0.505	0.325	8.14948e-08		Zbtb5	4.04602e-06	0.0976084	0.096	0.036	0.125641
D030056L22Rik	1.59426e-59	0.282451	0.52	0.322	4.95065e-55		Azin1	8.15027e-10	0.16752	0.42	0.241	2.5309e-05		Pkig	6.3705e-06	0.0534683	0.056	0.009	0.197823		Hltf	6.70687e-32	0.246424	0.169	0.098	2.08268e-27		Midn	2.72978e-12	0.107149	0.233	0.129	8.47678e-08		Usp3	4.09192e-06	0.166102	0.321	0.187	0.127066
Ptcd3	2.52023e-59	0.136557	0.271	0.127	7.82608e-55		Adarb1	8.3073e-10	0.0718728	0.068	0.018	2.57967e-05		Mrpl43	6.37713e-06	0.267133	0.697	0.424	0.198029		Ift27	7.34902e-32	0.211262	0.14	0.073	2.28209e-27		Josd2	2.77406e-12	0.104334	0.215	0.115	8.6143e-08		Ggt5	4.09254e-06	0.0642273	0.055	0.015	0.127086
Spcs3	2.62629e-59	0.151255	0.385	0.205	8.15543e-55		Tfg	8.68378e-10	0.107832	0.332	0.168	2.69657e-05		Far1	6.42389e-06	0.158061	0.315	0.134	0.199481		Selenop	7.38963e-32	0.183507	0.099	0.04	2.2947e-27		Rcbtb1	2.81258e-12	0.0801074	0.095	0.038	8.7339e-08		1110019D14Rik	4.11213e-06	0.0406057	0.028	0.005	0.127694
1110008F13Rik	3.12538e-59	0.214393	0.663	0.439	9.70526e-55		Cxcl9	8.98812e-10	0.359304	0.044	0.009	2.79108e-05		Gramd1b	6.4278e-06	0.240638	0.551	0.29	0.199603		Hipk1	7.654e-32	0.313439	0.365	0.319	2.3768e-27		Dhrs4	2.89103e-12	0.0685143	0.14	0.064	8.97752e-08		Clasp2	4.15971e-06	0.113752	0.142	0.063	0.129171
Adpgk	3.26616e-59	0.139686	0.188	0.075	1.01424e-54		Hccs	9.18946e-10	0.135255	0.346	0.184	2.8536e-05		Ldha	6.65175e-06	0.271229	0.966	0.743	0.206557		Fopnl	8.14737e-32	0.236531	0.163	0.093	2.53e-27		Mtg1	3.01905e-12	0.0611143	0.089	0.034	9.37505e-08		Mvd	4.16504e-06	0.101247	0.106	0.041	0.129337
Psmd14	3.47875e-59	0.164841	0.498	0.289	1.08026e-54		Polr2l	9.58113e-10	0.118703	0.231	0.108	2.97523e-05		Otud4	6.76888e-06	0.206072	0.494	0.242	0.210194		Micall1	8.40909e-32	0.217692	0.128	0.064	2.61127e-27		Mum1	3.03873e-12	0.0925671	0.21	0.109	9.43616e-08		Ctcf	4.21274e-06	0.208003	0.587	0.435	0.130818
BC005561	4.76617e-59	0.143687	0.32	0.161	1.48004e-54		Siah2	9.79473e-10	0.118861	0.247	0.118	3.04156e-05		Rnf219	6.7732e-06	0.112986	0.281	0.113	0.210328		Mknk2	9.10407e-32	0.301872	0.254	0.186	2.82709e-27		Zmiz1	3.06369e-12	0.11444	0.373	0.229	9.51368e-08		Sord	4.23606e-06	0.0605897	0.037	0.008	0.131543
Cep83	4.98663e-59	0.150399	0.273	0.13	1.5485e-54		Cse1l	9.85639e-10	0.0766335	0.254	0.119	3.06071e-05		Ufm1	6.77649e-06	0.200452	0.584	0.3	0.21043		Kbtbd11	9.78154e-32	0.26606	0.238	0.162	3.03746e-27		Tbc1d4	3.06978e-12	0.0911108	0.26	0.144	9.5326e-08		Sfxn3	4.27571e-06	0.0865296	0.078	0.026	0.132774
Cdr2	4.99903e-59	0.0996524	0.088	0.019	1.55235e-54		Rps3	9.86994e-10	0.0936985	1	1	3.06491e-05		Rif1	6.92459e-06	0.200426	0.742	0.41	0.215029		Ifi214	1.15459e-31	0.191345	0.097	0.039	3.58534e-27		Vamp8	3.07869e-12	0.119371	0.528	0.341	9.56024e-08		Tpst2	4.29152e-06	0.1716	0.55	0.375	0.133264
Ddx24	1.06734e-58	0.196858	0.771	0.534	3.31441e-54		Fosl1	1.0027e-09	0.0841886	0.098	0.032	3.11368e-05		S100a11	6.96904e-06	0.238086	0.865	0.55	0.21641		E230032D23Rik	1.25785e-31	0.136433	0.063	0.017	3.90601e-27		Mical1	3.13651e-12	0.0932385	0.158	0.076	9.7398e-08		Mex3b	4.32841e-06	0.0828975	0.064	0.019	0.13441
Ube2g1	1.11737e-58	0.156291	0.388	0.208	3.46976e-54		Pycrl	1.03752e-09	0.112818	0.241	0.115	3.22182e-05		Stk16	7.22263e-06	0.14671	0.416	0.188	0.224284		Acap2	1.27486e-31	0.223243	0.134	0.068	3.95882e-27		Uckl1	3.14582e-12	0.078094	0.158	0.076	9.76872e-08		Hist2h2be	4.35512e-06	0.0509982	0.05	0.013	0.135239
Crls1	1.205e-58	0.131624	0.199	0.082	3.74188e-54		Serpine2	1.0432e-09	0.188389	0.064	0.017	3.23945e-05		Ormdl2	7.35372e-06	0.17526	0.404	0.191	0.228355		Trmt112	1.29e-31	0.285628	0.43	0.406	4.00585e-27		Cnot6l	3.15662e-12	0.200312	0.631	0.462	9.80226e-08		Stk16	4.39515e-06	0.215816	0.307	0.187	0.136483
Diexf	1.43057e-58	0.127179	0.165	0.06	4.44236e-54		Taf10	1.09973e-09	0.197587	0.892	0.695	3.41498e-05		Nop2	7.36588e-06	0.182494	0.371	0.173	0.228733		Ctsa	1.32705e-31	0.258287	0.177	0.106	4.12088e-27		Art2b	3.28205e-12	0.170792	0.667	0.483	1.01917e-07		Rabep2	4.4695e-06	0.0986958	0.147	0.065	0.138791
Carm1	1.73087e-58	0.119443	0.13	0.041	5.37487e-54		Reep3	1.11617e-09	0.166741	0.356	0.194	3.46605e-05		Fam98a	7.38051e-06	0.124627	0.27	0.108	0.229187		Srp9	1.33546e-31	0.207695	0.674	0.737	4.14702e-27		Cbx4	3.28536e-12	0.0637573	0.323	0.182	1.0202e-07		Cacna1a	4.47874e-06	0.14194	0.083	0.029	0.139078
Usp1	1.83944e-58	0.147291	0.355	0.184	5.71202e-54		Papd4	1.16126e-09	0.100398	0.322	0.165	3.60606e-05		Tomm70a	7.3955e-06	0.211115	0.596	0.323	0.229652		Wrn	1.48183e-31	0.201095	0.117	0.055	4.60152e-27		Nfic	3.28963e-12	0.0915854	0.126	0.056	1.02153e-07		Camk2b	4.49196e-06	0.0836698	0.064	0.019	0.139489
Raly	1.85183e-58	0.193215	0.637	0.407	5.75048e-54		Zfp131	1.20947e-09	0.108636	0.363	0.191	3.75577e-05		Tgs1	7.52811e-06	0.188207	0.427	0.204	0.233771		Trim35	1.4917e-31	0.2752	0.215	0.143	4.63218e-27		Cdc42ep3	3.43587e-12	0.0871164	0.393	0.235	1.06694e-07		Ufc1	4.58877e-06	0.195522	0.495	0.337	0.142495
Adrm1	2.43397e-58	0.144379	0.378	0.198	7.5582e-54		Mrps12	1.21018e-09	0.151824	0.519	0.304	3.75797e-05		Brd7	7.5497e-06	0.135665	0.483	0.229	0.234441		Tmem126b	1.61715e-31	0.161041	0.089	0.034	5.02175e-27		A630023P12Rik	3.46438e-12	0.0657726	0.131	0.058	1.07579e-07		Gm15417	4.60419e-06	0.0978802	0.069	0.022	0.142974
Spout1	2.44702e-58	0.125491	0.188	0.074	7.59874e-54		Eny2	1.22796e-09	0.172304	0.681	0.449	3.8132e-05		Ppm1g	7.71769e-06	0.225171	0.73	0.423	0.239657		Zzef1	1.6498e-31	0.240349	0.162	0.092	5.12312e-27		Maged2	3.49019e-12	0.0316879	0.038	0.009	1.08381e-07		2810006K23Rik	4.65481e-06	0.0764361	0.083	0.028	0.144546
Paics	2.98325e-58	0.151067	0.324	0.166	9.26388e-54		Fam208b	1.29093e-09	0.133412	0.495	0.285	4.00872e-05		Ythdf2	7.82831e-06	0.231963	0.528	0.282	0.243092		Fez2	1.6751e-31	0.157819	0.078	0.027	5.2017e-27		Gm11725	3.49168e-12	0.0201659	0.014	0.001	1.08427e-07		Zfp148	4.66154e-06	0.149009	0.454	0.296	0.144755
Arhgap17	4.02425e-58	0.17989	0.437	0.247	1.24965e-53		Med29	1.32079e-09	0.122028	0.417	0.231	4.10144e-05		Egr3	8.05184e-06	0.245292	0.438	0.22	0.250034		Mier1	1.73175e-31	0.300976	0.434	0.414	5.3776e-27		Nsd1	3.49649e-12	0.120069	0.605	0.412	1.08577e-07		D730003I15Rik	4.89286e-06	0.113956	0.106	0.042	0.151938
Txlng	7.65822e-58	0.134547	0.23	0.102	2.37811e-53		Mir17hg	1.32239e-09	0.0867041	0.22	0.101	4.10642e-05		Rps6kb1	8.25696e-06	0.173749	0.562	0.279	0.256403		Gse1	1.92762e-31	0.224764	0.135	0.069	5.98583e-27		Creb3l1	3.52337e-12	0.01589	0.014	0.001	1.09411e-07		Wdr76	4.99003e-06	0.134659	0.11	0.044	0.154955
Tfap4	1.5118e-57	0.11603	0.114	0.032	4.6946e-53		Ccdc59	1.33929e-09	0.147529	0.62	0.379	4.15889e-05		Dgat2	8.34656e-06	0.0195471	0.022	0.002	0.259186		Inpp4b	1.97107e-31	0.22947	0.599	0.598	6.12078e-27		Usf1	3.62815e-12	0.0803161	0.204	0.105	1.12665e-07		Kdm5d	5.06784e-06	0.137074	0.206	0.105	0.157372
Metap1	1.85344e-57	0.132778	0.236	0.106	5.75549e-53		Ppp2ca	1.36361e-09	0.188198	0.868	0.614	4.23443e-05		Hivep2	8.53767e-06	0.197683	0.596	0.312	0.26512		Ncald	2.12609e-31	0.134598	0.055	0.012	6.60215e-27		Hsdl1	3.63759e-12	0.07945	0.117	0.05	1.12958e-07		Nectin1	5.10905e-06	0.0688971	0.046	0.012	0.158651
Rbm27	1.8911e-57	0.145146	0.387	0.206	5.87245e-53		Elp5	1.42436e-09	0.104391	0.254	0.123	4.42306e-05		Ppp1r7	8.67518e-06	0.109232	0.416	0.186	0.26939		Cd101	2.18867e-31	0.100448	0.038	0.004	6.79649e-27		Slc25a11	3.67813e-12	0.0769867	0.409	0.242	1.14217e-07		Ezr	5.13835e-06	0.219019	0.528	0.376	0.159561
Rbm25	2.09503e-57	0.193257	0.888	0.685	6.50571e-53		Ccdc137	1.43497e-09	0.087013	0.169	0.071	4.45601e-05		Trim27	8.69957e-06	0.212029	0.562	0.306	0.270148		Setd1b	2.333e-31	0.281741	0.198	0.127	7.24467e-27		Atp1b1	3.683e-12	0.066317	0.08	0.029	1.14368e-07		Tmx4	5.17455e-06	0.122794	0.17	0.08	0.160685
Kansl2	2.17965e-57	0.146083	0.251	0.116	6.76845e-53		Epop	1.45307e-09	0.147139	0.315	0.165	4.51222e-05		Ctu2	8.74786e-06	0.159573	0.382	0.171	0.271647		Ccs	2.68339e-31	0.241866	0.166	0.098	8.33273e-27		Mrpl27	3.68802e-12	0.102346	0.246	0.137	1.14524e-07		Suclg1	5.17465e-06	0.202582	0.573	0.428	0.160688
Kdm6bos	3.54142e-57	0.0934732	0.065	0.009	1.09972e-52		Dnph1	1.45329e-09	0.0202526	0.02	0.002	4.51289e-05		Urb1	8.78309e-06	0.123481	0.247	0.096	0.272741		Tmem243	2.86121e-31	0.293186	0.312	0.253	8.88491e-27		Zfp945	3.75532e-12	0.0581161	0.194	0.097	1.16614e-07		3830406C13Rik	5.21449e-06	0.215731	0.317	0.192	0.161925
Hgh1	8.36835e-57	0.110662	0.134	0.043	2.59862e-52		Wdr61	1.47565e-09	0.172409	0.512	0.306	4.58234e-05		Utp3	8.99093e-06	0.253785	0.753	0.441	0.279195		Mien1	2.89984e-31	0.265003	0.46	0.444	9.00487e-27		Csrp1	3.76955e-12	0.0794146	0.149	0.07	1.17056e-07		St6galnac6	5.27374e-06	0.0852529	0.05	0.014	0.163765
Med29	8.40775e-57	0.134825	0.345	0.178	2.61086e-52		Ctss	1.47935e-09	0.102323	0.237	0.112	4.59383e-05		Arpc5	9.02148e-06	0.226259	0.888	0.661	0.280144		Arid1a	3.22515e-31	0.311871	0.426	0.404	1.0015e-26		Lamtor2	3.80358e-12	0.11371	0.614	0.411	1.18113e-07		Abi3	5.30916e-06	0.125873	0.22	0.111	0.164865
Bag2	1.1471e-56	0.0895781	0.063	0.008	3.56209e-52		Thoc1	1.47936e-09	0.0903333	0.292	0.145	4.59386e-05		Pebp1	9.09581e-06	0.246235	0.91	0.647	0.282452		Slc35a5	3.43847e-31	0.16703	0.086	0.032	1.06775e-26		Mark2	3.82871e-12	0.1131	0.425	0.267	1.18893e-07		Klf6	5.31633e-06	0.258628	0.358	0.226	0.165088
Uchl5	1.22742e-56	0.148513	0.337	0.174	3.8115e-52		mt-Cytb	1.62178e-09	0.111728	1	1	5.03611e-05		Casc3	9.11171e-06	0.1188	0.326	0.138	0.282946		Sdha	3.60327e-31	0.305276	0.364	0.323	1.11892e-26		Gm28192	3.83389e-12	0.0126232	0.008	0	1.19054e-07		Zbtb20	5.38924e-06	0.244617	0.294	0.175	0.167352
Rbm15	1.34532e-56	0.123404	0.241	0.109	4.17761e-52		Atp13a3	1.63946e-09	0.119395	0.403	0.221	5.09101e-05		Rbm6	9.21822e-06	0.149139	0.528	0.261	0.286253		Leprot	4.16626e-31	0.203856	0.119	0.057	1.29375e-26		Washc1	3.84056e-12	0.0920407	0.167	0.082	1.19261e-07		Tspoap1	5.43245e-06	0.0521041	0.041	0.01	0.168694
Tm9sf4	1.71137e-56	0.132298	0.276	0.132	5.3143e-52		Nudcd1	1.64045e-09	0.06665	0.21	0.093	5.0941e-05		Zfp706	9.26926e-06	0.230147	0.854	0.577	0.287838		Glipr1	4.3194e-31	0.268395	0.242	0.171	1.3413e-26		Dpp3	3.88123e-12	0.0961825	0.209	0.111	1.20524e-07		Prr12	5.43883e-06	0.110884	0.124	0.052	0.168892
Parl	3.5315e-56	0.148824	0.391	0.212	1.09664e-51		Acsl5	1.69549e-09	0.153938	0.414	0.232	5.26501e-05		Lrrc58	9.31148e-06	0.202516	0.427	0.211	0.289149		Pdcd6ip	4.47125e-31	0.309887	0.387	0.357	1.38846e-26		Paxx	3.89846e-12	0.0882221	0.214	0.112	1.21059e-07		4933408B17Rik	5.65359e-06	0.0412907	0.028	0.005	0.175561
Pdcd5	3.64162e-56	0.194965	0.66	0.431	1.13083e-51		Trmt1	1.74906e-09	0.120444	0.325	0.169	5.43136e-05		Tnfsf14	9.32506e-06	0.281521	0.708	0.408	0.289571		Arpc2	4.52209e-31	0.132372	0.898	0.946	1.40424e-26		Ccdc69	4.03162e-12	0.0535059	0.106	0.043	1.25194e-07		Bptf	5.68452e-06	0.183333	0.633	0.47	0.176521
Relb	3.84186e-56	0.131067	0.475	0.268	1.19301e-51		Dph3	1.78417e-09	0.134099	0.573	0.335	5.5404e-05		Gm26669	9.4213e-06	0.211235	0.258	0.107	0.29256		Sppl2a	4.71734e-31	0.288169	0.226	0.155	1.46487e-26		Pigyl	4.16362e-12	0.0534751	0.189	0.094	1.29293e-07		Acot13	5.68743e-06	0.155138	0.216	0.113	0.176612
Srpr	3.85211e-56	0.153712	0.502	0.293	1.1962e-51		Wsb1	1.84657e-09	0.120358	0.386	0.209	5.73416e-05		Tet2	9.49848e-06	0.113128	0.416	0.191	0.294956		Rab4a	4.9155e-31	0.182947	0.095	0.039	1.52641e-26		Mpv17l2	4.20654e-12	0.082559	0.172	0.085	1.30626e-07		Anapc11	5.69368e-06	0.165393	0.317	0.185	0.176806
Slc25a32	6.62165e-56	0.126224	0.173	0.068	2.05622e-51		Cblb	1.9558e-09	0.158954	0.505	0.299	6.07336e-05		Ncbp1	9.7092e-06	0.167294	0.337	0.15	0.3015		Rbm24	5.15135e-31	0.131025	0.058	0.014	1.59965e-26		Prdm16	4.21529e-12	0.0598944	0.066	0.022	1.30897e-07		Mib1	5.7029e-06	0.161277	0.151	0.071	0.177092
Ssr3	9.81318e-56	0.157646	0.401	0.222	3.04729e-51		Dhx33	1.99133e-09	0.111433	0.193	0.087	6.18367e-05		Tpm3	9.92804e-06	0.249374	0.933	0.71	0.308295		Smim19	5.63971e-31	0.202279	0.117	0.056	1.7513e-26		Mcts1	4.24239e-12	0.111339	0.424	0.269	1.31739e-07		Clnk	5.77139e-06	0.0411488	0.023	0.003	0.179219
Trim28	1.0425e-55	0.138814	0.287	0.141	3.23728e-51		Twsg1	2.00484e-09	0.0869759	0.095	0.031	6.22563e-05		Naa30	9.989e-06	0.140313	0.292	0.123	0.310188		Gnas	7.43598e-31	0.159599	0.872	0.928	2.30909e-26		Als2cl	4.37673e-12	0.0683899	0.078	0.028	1.35911e-07		Kif1bp	5.78186e-06	0.11014	0.124	0.052	0.179544
Fam98a	1.38695e-55	0.130713	0.179	0.072	4.3069e-51		Adsl	2.03223e-09	0.128817	0.332	0.177	6.31067e-05		Yrdc	1.00065e-05	0.234775	0.742	0.422	0.310732		Ube2r2	7.79594e-31	0.306564	0.296	0.236	2.42087e-26		0610012G03Rik	4.41457e-12	0.0991306	0.424	0.265	1.37086e-07		Gabarap	5.80399e-06	0.18185	0.757	0.587	0.180231
Abtb2	2.56265e-55	0.130057	0.131	0.043	7.95781e-51		Tcof1	2.17544e-09	0.184656	0.539	0.332	6.75541e-05		Ssrp1	1.00632e-05	0.230663	0.742	0.441	0.312492		Aamdc	8.81585e-31	0.201412	0.122	0.06	2.73759e-26		Rab22a	4.42507e-12	0.114189	0.28	0.164	1.37412e-07		Mtr	5.84155e-06	0.118048	0.115	0.047	0.181398
Pold2	2.80816e-55	0.123701	0.199	0.083	8.72017e-51		Nubp2	2.18245e-09	0.141816	0.308	0.162	6.77717e-05		Polr1b	1.0066e-05	0.183749	0.303	0.133	0.312581		Naga	9.08178e-31	0.183469	0.096	0.039	2.82017e-26		Polr2g	4.51153e-12	0.128496	0.561	0.374	1.40096e-07		Ankzf1	5.9225e-06	0.102744	0.101	0.039	0.183911
P4hb	2.84932e-55	0.149073	0.339	0.179	8.84798e-51		Jarid2	2.23067e-09	0.178251	0.417	0.241	6.92691e-05		Tmed5	1.01666e-05	0.266029	0.831	0.574	0.315704		Baz2a	9.61048e-31	0.300373	0.231	0.164	2.98434e-26		Trim12c	4.62553e-12	0.101215	0.283	0.162	1.43636e-07		Macf1	5.94752e-06	0.276807	0.514	0.372	0.184688
Il4ra	3.9909e-55	0.157175	0.247	0.115	1.2393e-50		Prdx3	2.23385e-09	0.153581	0.515	0.302	6.93679e-05		Mthfd2	1.0242e-05	0.256214	0.461	0.244	0.318044		Mettl23	9.6903e-31	0.246847	0.5	0.498	3.00913e-26		Tle4	4.69929e-12	0.0962233	0.381	0.229	1.45927e-07		Impg2	5.96117e-06	0.0302592	0.014	0.001	0.185112
Polr1a	4.05826e-55	0.133234	0.205	0.088	1.26021e-50		Hnrnpd	2.24675e-09	0.193482	0.888	0.672	6.97682e-05		Siah2	1.02748e-05	0.222032	0.281	0.121	0.319062		Trip11	1.05727e-30	0.316784	0.372	0.327	3.28313e-26		Ctsa	4.70058e-12	0.0932848	0.247	0.136	1.45967e-07		Fzd6	6.0098e-06	0.0239377	0.014	0.001	0.186622
E2f5	4.26325e-55	0.0930607	0.089	0.021	1.32387e-50		Fnbp1	2.25061e-09	0.186743	0.712	0.472	6.98883e-05		Grasp	1.04328e-05	0.110775	0.258	0.102	0.323969		Ivd	1.06601e-30	0.18446	0.104	0.046	3.31029e-26		Ppp1r35	4.71966e-12	0.0879925	0.28	0.158	1.4656e-07		Rbm5	6.06351e-06	0.199483	0.573	0.408	0.18829
Rpl31	5.33862e-55	0.179489	0.941	0.776	1.6578e-50		Smarca5	2.25638e-09	0.180824	0.773	0.52	7.00673e-05		Tnfaip8	1.05079e-05	0.393066	0.798	0.571	0.326303		Eya2	1.1819e-30	0.14085	0.064	0.018	3.67014e-26		Rtn4rl1	4.81169e-12	0.0603436	0.081	0.03	1.49417e-07		Rab19	6.14015e-06	0.1755	0.234	0.125	0.19067
Vmp1	6.63294e-55	0.157014	0.438	0.248	2.05973e-50		Mtf1	2.27063e-09	0.096919	0.234	0.11	7.05099e-05		BC024978	1.08045e-05	0.0670448	0.09	0.021	0.335513		Dtx3l	1.21963e-30	0.24813	0.174	0.104	3.78731e-26		Arfip1	4.85271e-12	0.0594726	0.095	0.038	1.50691e-07		Gm39323	6.15749e-06	0.0812404	0.073	0.024	0.191209
Mnt	6.69151e-55	0.129671	0.185	0.076	2.07791e-50		Rbm38	2.29397e-09	0.128891	0.417	0.235	7.12347e-05		Imp3	1.08364e-05	0.24693	0.876	0.605	0.336503		Foxo3	1.41366e-30	0.227254	0.133	0.069	4.38985e-26		Nudt16	4.93001e-12	0.0903045	0.146	0.069	1.53092e-07		Strip1	6.15931e-06	0.128256	0.128	0.056	0.191265
Eif3m	6.89444e-55	0.18074	0.9	0.728	2.14093e-50		Trim27	2.30474e-09	0.138669	0.515	0.302	7.15692e-05		Kars	1.08955e-05	0.189189	0.461	0.233	0.338337		Pde6d	1.43064e-30	0.195307	0.114	0.053	4.44256e-26		St8sia1	5.16276e-12	0.0476961	0.029	0.006	1.60319e-07		Phldb3	6.19786e-06	0.0572176	0.05	0.013	0.192462
Utp3	7.73933e-55	0.1701	0.588	0.366	2.40329e-50		Cst6	2.32249e-09	0.0699207	0.027	0.004	7.21201e-05		Banf1	1.09011e-05	0.248943	0.775	0.46	0.338512		Acads	1.78789e-30	0.212277	0.138	0.073	5.55194e-26		Ak3	5.19752e-12	0.077336	0.101	0.041	1.61399e-07		Atp6v0e	6.24404e-06	0.18525	0.798	0.682	0.193896
Dock10	8.0666e-55	0.255709	0.761	0.572	2.50492e-50		Gimap5	2.33847e-09	0.240384	0.905	0.7	7.26164e-05		Dhx29	1.10836e-05	0.116018	0.247	0.097	0.34418		Cdkn2c	1.9829e-30	0.163681	0.083	0.031	6.15749e-26		Srd5a3	5.26867e-12	0.0574377	0.115	0.049	1.63608e-07		Gpcpd1	6.34026e-06	0.147568	0.206	0.106	0.196884
Hivep2	8.15584e-55	0.172521	0.435	0.25	2.53263e-50		Denr	2.36892e-09	0.126875	0.566	0.335	7.35621e-05		Atp13a1	1.13604e-05	0.147093	0.292	0.124	0.352773		Qpct	2.50758e-30	0.225708	0.168	0.097	7.78678e-26		Prkacb	5.35419e-12	0.0791729	0.404	0.242	1.66264e-07		Paip2	6.50634e-06	0.234169	0.651	0.507	0.202041
Rgs1	8.83832e-55	0.622835	0.588	0.456	2.74456e-50		Mafg	2.39685e-09	0.151391	0.363	0.201	7.44294e-05		Eif2b1	1.14252e-05	0.0982749	0.247	0.095	0.354787		Tcf3	2.9592e-30	0.260205	0.21	0.141	9.1892e-26		Abcd1	5.39043e-12	0.0574432	0.089	0.034	1.67389e-07		Angptl6	6.6468e-06	0.0805889	0.041	0.01	0.206403
Urb2	9.5391e-55	0.109725	0.097	0.025	2.96218e-50		1110004E09Rik	2.45208e-09	0.0835613	0.244	0.116	7.61443e-05		Tmem33	1.14459e-05	0.249569	0.461	0.244	0.355429		Immp1l	3.04817e-30	0.260971	0.223	0.154	9.46547e-26		Gm43352	5.51922e-12	0.0491404	0.048	0.013	1.71388e-07		Pkp4	6.84768e-06	0.09375	0.115	0.047	0.212641
Fastkd2	1.05303e-54	0.104538	0.13	0.043	3.26998e-50		Enox1	2.47944e-09	0.0541295	0.054	0.013	7.69942e-05		Sdc4	1.16062e-05	0.123501	0.034	0.004	0.360407		Nudt22	3.06632e-30	0.147524	0.072	0.024	9.52185e-26		Kctd2	5.58692e-12	0.112095	0.189	0.096	1.73491e-07		R3hdm2	6.85965e-06	0.144871	0.252	0.14	0.213013
Gcn1l1	1.36892e-54	0.135339	0.293	0.146	4.2509e-50		Pold2	2.50226e-09	0.110612	0.247	0.12	7.77025e-05		Ggta1	1.16455e-05	0.135229	0.124	0.035	0.361626		Klhl25	3.28818e-30	0.1387	0.068	0.021	1.02108e-25		Paqr8	5.69304e-12	0.0321961	0.031	0.006	1.76786e-07		Zbtb7b	6.93307e-06	0.118439	0.216	0.11	0.215293
Acaca	1.45568e-54	0.110035	0.139	0.048	4.52033e-50		Nhlrc1	2.59945e-09	0.0832302	0.071	0.02	8.07208e-05		Naa15	1.17991e-05	0.252862	0.663	0.388	0.366399		Xylt2	3.30346e-30	0.185884	0.094	0.039	1.02582e-25		Phf21a	5.79027e-12	0.113683	0.249	0.137	1.79805e-07		Stk4	7.12426e-06	0.164438	0.532	0.361	0.22123
Agpat4	1.5132e-54	0.103072	0.078	0.016	4.69893e-50		Maml3	2.61312e-09	0.0630994	0.058	0.014	8.11451e-05		Plk3	1.22475e-05	0.254141	0.337	0.158	0.380322		Ate1	3.41271e-30	0.25521	0.2	0.13	1.05975e-25		Uvssa	5.91932e-12	0.0752821	0.152	0.072	1.83812e-07		Adamts10	7.12644e-06	0.118195	0.165	0.078	0.221297
Fxr1	2.02795e-54	0.159476	0.507	0.299	6.2974e-50		Mapk11	2.7187e-09	0.0678865	0.064	0.017	8.44239e-05		Uggt1	1.2421e-05	0.129125	0.281	0.116	0.385708		Ndufa8	4.26042e-30	0.252952	0.446	0.426	1.32299e-25		2510002D24Rik	5.96697e-12	0.0914679	0.272	0.154	1.85292e-07		Kcnmb4os2	7.16348e-06	0.0437755	0.018	0.002	0.222448
Rybp	2.49135e-54	0.121863	0.189	0.078	7.73638e-50		Xpo4	2.75496e-09	0.120545	0.288	0.148	8.55498e-05		E030037K01Rik	1.2511e-05	0.0368055	0.034	0.004	0.388505		Clip1	4.27158e-30	0.281999	0.238	0.168	1.32645e-25		Tox	5.98689e-12	0.102293	0.111	0.048	1.85911e-07		Pde6d	7.21988e-06	0.0977954	0.174	0.083	0.224199
Rasa2	3.93716e-54	0.173741	0.419	0.238	1.22261e-49		Cdkn2a	2.77592e-09	0.03381	0.031	0.005	8.62006e-05		Faap100	1.25266e-05	0.105073	0.202	0.073	0.38899		Rtf1	4.64093e-30	0.301921	0.431	0.414	1.44115e-25		Tor1aip1	5.99208e-12	0.113187	0.476	0.309	1.86072e-07		Myl6	7.2442e-06	0.166502	0.991	0.97	0.224954
Adora2a	5.26558e-54	0.135615	0.255	0.12	1.63512e-49		Vma21	2.8817e-09	0.0869211	0.38	0.202	8.94853e-05		Fgd1	1.25773e-05	0.051027	0.045	0.006	0.390564		Trim5	4.79551e-30	0.141159	0.063	0.018	1.48915e-25		2900093K20Rik	6.06636e-12	0.0583756	0.043	0.011	1.88379e-07		Egf	7.271e-06	0.0323303	0.018	0.002	0.225787
Psmb2	6.67229e-54	0.194341	0.748	0.514	2.07195e-49		Scaf4	2.9635e-09	0.1107	0.312	0.161	9.20257e-05		Cers2	1.26209e-05	0.170686	0.517	0.265	0.391917		Lztfl1	4.97326e-30	0.290289	0.247	0.177	1.54435e-25		Cuta	6.07981e-12	0.0982708	0.402	0.246	1.88796e-07		Ampd3	7.28003e-06	0.0293501	0.018	0.002	0.226067
Mgll	9.78241e-54	0.13272	0.133	0.045	3.03773e-49		Mrps18a	2.98732e-09	0.117249	0.414	0.228	9.27652e-05		Gtf2e1	1.26945e-05	0.0947088	0.146	0.045	0.394202		Ubash3a	5.07178e-30	0.110128	0.047	0.009	1.57494e-25		Anapc5	6.25823e-12	0.146816	0.366	0.231	1.94337e-07		Fuom	7.32599e-06	0.105895	0.087	0.032	0.227494
Sap18	1.34343e-53	0.160866	0.53	0.316	4.17174e-49		Mapk1ip1l	3.02351e-09	0.118623	0.447	0.252	9.3889e-05		9530068E07Rik	1.27629e-05	0.138541	0.393	0.18	0.396325		Klk8	5.71375e-30	0.270295	0.456	0.434	1.77429e-25		Paqr7	6.36303e-12	0.070008	0.074	0.026	1.97591e-07		Dcaf5	7.3589e-06	0.12443	0.202	0.103	0.228516
Gm15283	1.42561e-53	0.0941923	0.078	0.016	4.42693e-49		Abcb1b	3.04074e-09	0.0739248	0.081	0.025	9.44241e-05		Psmg3	1.28039e-05	0.150896	0.36	0.162	0.397599		Fbxl12	5.98308e-30	0.242594	0.17	0.102	1.85793e-25		Epb41l4aos	6.39502e-12	0.11832	0.21	0.114	1.98585e-07		Rps16	7.5221e-06	0.0788244	1	1	0.233584
Champ1	1.65045e-53	0.126699	0.176	0.071	5.12516e-49		Tmem97	3.10584e-09	0.120425	0.21	0.099	9.64457e-05		Surf2	1.28174e-05	0.152944	0.427	0.206	0.398017		Ctla2a	6.29441e-30	0.335039	0.369	0.312	1.9546e-25		Khk	6.60225e-12	0.0552206	0.091	0.035	2.0502e-07		Ripor1	7.61279e-06	0.074227	0.078	0.027	0.2364
U2surp	1.81157e-53	0.181356	0.62	0.393	5.62547e-49		Tm9sf4	3.1786e-09	0.114888	0.336	0.177	9.87052e-05		Cox11	1.29666e-05	0.151544	0.236	0.093	0.402652		Ssbp2	6.74658e-30	0.210196	0.129	0.066	2.09502e-25		Hcls1	6.73664e-12	0.120368	0.545	0.361	2.09193e-07		Ing1	7.68988e-06	0.153278	0.367	0.222	0.238794
Ahcyl1	2.28475e-53	0.128167	0.265	0.129	7.09484e-49		Aprt	3.26226e-09	0.209709	0.729	0.524	0.000101303		Hccs	1.30833e-05	0.178864	0.393	0.187	0.406274		Amz2	6.91272e-30	0.176195	0.102	0.044	2.14661e-25		Tdrkh	6.78583e-12	0.0544799	0.045	0.012	2.1072e-07		Ing4	7.71497e-06	0.167611	0.252	0.14	0.239573
Trp53rkb	3.11159e-53	0.103388	0.133	0.045	9.66242e-49		Atoh8	3.38209e-09	0.0126012	0.014	0.001	0.000105024		Acbd3	1.31281e-05	0.152087	0.404	0.189	0.407667		Zc3h7a	7.4851e-30	0.286762	0.229	0.162	2.32435e-25		Cd6	6.78871e-12	0.141402	0.432	0.285	2.1081e-07		Esyt2	7.72545e-06	0.138889	0.339	0.199	0.239898
Tmem183a	3.35184e-53	0.124271	0.235	0.108	1.04085e-48		Mapkapk2	3.40334e-09	0.115042	0.549	0.319	0.000105684		Cdk7	1.34083e-05	0.206382	0.371	0.18	0.416368		Ankrd54	7.91702e-30	0.218128	0.127	0.065	2.45847e-25		Znrf1	6.853e-12	0.123239	0.335	0.204	2.12806e-07		Sept11	7.73665e-06	0.228554	0.5	0.349	0.240246
Sh3bp2	3.37455e-53	0.109574	0.113	0.034	1.0479e-48		Ecd	3.40542e-09	0.0947417	0.261	0.129	0.000105748		Pdrg1	1.34689e-05	0.214774	0.562	0.309	0.418251		Srgap2	8.11549e-30	0.180055	0.107	0.048	2.5201e-25		Dctn5	6.93509e-12	0.0716584	0.132	0.06	2.15355e-07		2810405F17Rik	7.84142e-06	0.0757155	0.069	0.022	0.2435
Snapc4	3.66875e-53	0.0939552	0.103	0.028	1.13926e-48		Pisd	3.42211e-09	0.117611	0.214	0.101	0.000106267		Adpgk	1.35034e-05	0.145588	0.27	0.113	0.41932		Acbd5	8.11978e-30	0.225563	0.142	0.077	2.52144e-25		Ppic	7.59503e-12	0.0261994	0.017	0.002	2.35849e-07		Cbx2	7.87572e-06	0.0473649	0.032	0.006	0.244565
Rexo2	4.37234e-53	0.159694	0.533	0.322	1.35774e-48		Metap1	3.52953e-09	0.128942	0.285	0.147	0.000109602		Rnf4	1.35138e-05	0.20021	0.607	0.326	0.419643		Vars	8.63532e-30	0.283126	0.331	0.275	2.68153e-25		Nhsl2	7.64331e-12	0.0319945	0.017	0.002	2.37348e-07		Mfge8	7.97533e-06	0.070593	0.046	0.012	0.247658
Prpf40a	4.5835e-53	0.184105	0.683	0.456	1.42331e-48		Cad	3.56194e-09	0.0843927	0.176	0.076	0.000110609		Tardbp	1.36037e-05	0.249845	0.674	0.389	0.422437		Nr2c2	9.05675e-30	0.260534	0.192	0.123	2.81239e-25		Morc1	7.8042e-12	0.0220939	0.009	0	2.42344e-07		Fam35a	8.04012e-06	0.0853728	0.083	0.029	0.24967
Cdkn1a	4.81923e-53	0.0852048	0.058	0.008	1.49652e-48		Cd74	3.62715e-09	0.143734	0.092	0.03	0.000112634		Sap30bp	1.37181e-05	0.151347	0.281	0.119	0.425988		Atp5j	9.17449e-30	0.191802	0.739	0.809	2.84896e-25		Cnppd1	7.96292e-12	0.0910902	0.229	0.124	2.47273e-07		Bscl2	8.18931e-06	0.134671	0.271	0.15	0.254303
Spen	7.01304e-53	0.174581	0.388	0.219	2.17776e-48		Kpna2	3.63005e-09	0.0784608	0.122	0.045	0.000112724		Tmem97	1.41254e-05	0.172268	0.247	0.101	0.438638		Itpkb	9.388e-30	0.302373	0.359	0.308	2.91526e-25		Fli1	7.98633e-12	0.13633	0.396	0.249	2.48e-07		Plcb2	8.34913e-06	0.15521	0.17	0.083	0.259265
Ppp2r1b	7.66218e-53	0.110156	0.171	0.068	2.37934e-48		Mtss1	3.64282e-09	0.0626242	0.051	0.012	0.00011312		Aup1	1.41358e-05	0.125381	0.506	0.245	0.43896		Rnf181	9.93254e-30	0.208118	0.127	0.065	3.08435e-25		Echs1	8.18158e-12	0.110095	0.25	0.142	2.54063e-07		Hbp1	8.36849e-06	0.116946	0.183	0.09	0.259867
Nucks1	8.38088e-53	0.189821	0.738	0.518	2.60251e-48		Rpl21	3.70885e-09	0.092721	1	1	0.000115171		Lpcat3	1.43204e-05	0.126955	0.303	0.129	0.444693		Casp7	1.07361e-29	0.138981	0.063	0.018	3.33387e-25		Pbx2	8.4907e-12	0.0810162	0.154	0.074	2.63662e-07		Gatad1	8.42663e-06	0.21878	0.344	0.224	0.261672
Perp	8.62681e-53	0.131194	0.05	0.004	2.67888e-48		Psmc5	3.80269e-09	0.141417	0.627	0.382	0.000118085		Scarb1	1.44508e-05	0.115341	0.112	0.031	0.448741		Rassf5	1.1489e-29	0.244997	0.455	0.423	3.56767e-25		Gmpr2	8.50766e-12	0.0829301	0.132	0.061	2.64188e-07		Slc25a45	8.54386e-06	0.0643077	0.096	0.036	0.265312
Thoc7	1.17702e-52	0.163283	0.569	0.352	3.65501e-48		Edf1	3.93654e-09	0.161278	0.898	0.715	0.000122242		Polr1e	1.44751e-05	0.19277	0.281	0.123	0.449495		Ssna1	1.37353e-29	0.255178	0.211	0.143	4.26521e-25		Arhgap27os3	8.51568e-12	0.0717833	0.111	0.047	2.64437e-07		Rps14	8.55396e-06	0.0794908	1	1	0.265626
Atg16l2	1.64679e-52	0.125445	0.174	0.071	5.11376e-48		Hdac2	3.94352e-09	0.135048	0.495	0.287	0.000122458		Rab5a	1.45804e-05	0.124341	0.371	0.168	0.452765		Arhgap26	1.47175e-29	0.203446	0.119	0.059	4.57024e-25		Tmsb10	8.53642e-12	0.106426	0.998	0.991	2.65081e-07		Lmna	8.81063e-06	0.0585552	0.037	0.008	0.273597
Gem	1.6519e-52	0.145128	0.142	0.051	5.12964e-48		Colgalt1	3.97122e-09	0.089086	0.258	0.126	0.000123318		Ywhae	1.46839e-05	0.22448	0.764	0.486	0.455978		Vps41	1.49803e-29	0.204557	0.13	0.067	4.65182e-25		Sgta	8.62485e-12	0.0989844	0.233	0.13	2.67828e-07		Golgb1	8.8911e-06	0.134152	0.28	0.16	0.276095
Sh3rf1	1.97964e-52	0.0883371	0.077	0.016	6.14739e-48		Rwdd4a	3.99767e-09	0.107589	0.424	0.235	0.00012414		Serpine1	1.50175e-05	0.0399919	0.022	0.002	0.466337		Ncapd3	1.50049e-29	0.193755	0.121	0.06	4.65948e-25		Echdc1	8.66298e-12	0.0690826	0.08	0.03	2.69012e-07		Mettl7a1	9.17589e-06	0.0867119	0.092	0.034	0.284939
Ppp2cb	3.36341e-52	0.118317	0.223	0.101	1.04444e-47		Dis3	4.10582e-09	0.0976995	0.288	0.146	0.000127498		Sema7a	1.50933e-05	0.215618	0.404	0.201	0.468693		Arhgef18	2.0176e-29	0.180132	0.112	0.052	6.26527e-25		Virma	8.73351e-12	0.128819	0.326	0.198	2.71202e-07		Vps9d1	9.38071e-06	0.115799	0.11	0.045	0.291299
Rnf7	3.58571e-52	0.167159	0.582	0.362	1.11347e-47		Gdap10	4.14026e-09	0.101453	0.125	0.048	0.000128568		2010007H06Rik	1.51812e-05	0.0263776	0.022	0.002	0.471421		Htatip2	2.88968e-29	0.204983	0.13	0.068	8.97333e-25		Atp5f1	8.76864e-12	0.151457	0.896	0.797	2.72292e-07		Mfap1a	9.39072e-06	0.118041	0.22	0.115	0.29161
Elk1	4.01514e-52	0.101659	0.098	0.026	1.24682e-47		Adh5	4.14923e-09	0.165338	0.573	0.35	0.000128846		Trip10	1.52132e-05	0.066396	0.079	0.017	0.472414		Tnks2	3.59974e-29	0.30169	0.274	0.215	1.11783e-24		Prim1	8.92573e-12	0.0582043	0.066	0.022	2.77171e-07		Gpbp1l1	9.41501e-06	0.165235	0.339	0.207	0.292364
Cox11	6.05434e-52	0.107835	0.157	0.06	1.88005e-47		Ibtk	4.15148e-09	0.0892504	0.258	0.127	0.000128916		Rpn1	1.52521e-05	0.24473	0.562	0.313	0.473624		Gatd1	3.72381e-29	0.189135	0.111	0.053	1.15636e-24		Mfsd1	8.95905e-12	0.0698971	0.129	0.058	2.78205e-07		Acbd5	9.45205e-06	0.188932	0.206	0.109	0.293514
Ankrd28	7.37684e-52	0.108604	0.107	0.032	2.29073e-47		Dhrs7b	4.50147e-09	0.0858701	0.2	0.091	0.000139784		Psmd12	1.52619e-05	0.206414	0.753	0.445	0.473927		Sh2b1	3.78383e-29	0.208001	0.128	0.066	1.17499e-24		Sptssa	9.0121e-12	0.155445	0.891	0.735	2.79853e-07		Mob3a	9.46655e-06	0.147555	0.243	0.133	0.293965
Pnpt1	8.3463e-52	0.116967	0.177	0.073	2.59178e-47		Eif5	4.55331e-09	0.198976	0.922	0.788	0.000141394		Ripk3	1.54254e-05	0.18008	0.225	0.088	0.479006		Tm2d2	3.79155e-29	0.211702	0.144	0.08	1.17739e-24		Mat2b	9.20878e-12	0.115394	0.492	0.317	2.8596e-07		Dpysl2	9.53392e-06	0.107568	0.179	0.088	0.296057
Rbbp8	9.62081e-52	0.108036	0.114	0.036	2.98755e-47		Slc30a4	4.57768e-09	0.0421474	0.037	0.007	0.000142151		Ywhag	1.54302e-05	0.177362	0.528	0.27	0.479154		Plcb2	4.01333e-29	0.193647	0.113	0.054	1.24626e-24		Ufsp2	9.49821e-12	0.0770653	0.152	0.073	2.94948e-07		Scrn3	9.59577e-06	0.088845	0.087	0.032	0.297977
Ubtd2	1.0517e-51	0.0800378	0.054	0.006	3.26583e-47		Ywhah	4.73615e-09	0.158836	0.607	0.379	0.000147072		Dnajb3	1.54467e-05	0.0201327	0.022	0.002	0.479666		Map1lc3b	4.18116e-29	0.229996	0.577	0.622	1.29838e-24		Rab4a	9.66012e-12	0.0675933	0.138	0.064	2.99976e-07		Gng2	9.67486e-06	0.184728	0.312	0.186	0.300433
Rpf1	1.1728e-51	0.124372	0.35	0.187	3.64189e-47		Isg20l2	4.92278e-09	0.110094	0.278	0.14	0.000152867		6530409C15Rik	1.54802e-05	0.0218746	0.022	0.002	0.480706		Selenok	4.21926e-29	0.185353	0.655	0.709	1.31021e-24		Mbd6	9.66959e-12	0.0932896	0.104	0.044	3.0027e-07		Socs4	9.68925e-06	0.144512	0.229	0.126	0.30088
Ino80	1.2543e-51	0.136516	0.291	0.148	3.89497e-47		Telo2	5.13983e-09	0.0842395	0.234	0.112	0.000159607		Polr3k	1.55203e-05	0.161872	0.461	0.224	0.481951		Ppm1j	4.81872e-29	0.193891	0.115	0.055	1.49636e-24		C1d	9.72741e-12	0.122379	0.372	0.231	3.02065e-07		Trib2	9.72472e-06	0.134714	0.161	0.076	0.301982
Wdr74	1.85131e-51	0.0955846	0.101	0.028	5.74887e-47		Dcaf13	5.13993e-09	0.114421	0.424	0.239	0.00015961		Taf10	1.56523e-05	0.256269	0.91	0.699	0.486052		Lnpep	5.57842e-29	0.283124	0.258	0.193	1.73227e-24		Itga6	9.87939e-12	0.0725328	0.075	0.027	3.06785e-07		Sh2d3c	9.81783e-06	0.121323	0.294	0.164	0.304873
Las1l	1.86209e-51	0.141324	0.32	0.169	5.78233e-47		Gm26669	5.27871e-09	0.108153	0.22	0.105	0.00016392		Clptm1	1.57305e-05	0.118415	0.326	0.14	0.488481		Capn1	6.06574e-29	0.207622	0.142	0.078	1.88359e-24		Wdr44	9.88412e-12	0.0655752	0.167	0.082	3.06932e-07		Lamtor3	9.99274e-06	0.171451	0.326	0.202	0.310304
Srp72	2.1432e-51	0.16579	0.554	0.343	6.65527e-47		Trnt1	5.45959e-09	0.144012	0.393	0.224	0.000169537		Nsg2	1.58793e-05	0.0558143	0.067	0.013	0.493098		Phyh	6.09293e-29	0.196331	0.109	0.051	1.89204e-24		Rad51d	9.95595e-12	0.0598605	0.129	0.058	3.09162e-07		Tor2a	1.00077e-05	0.143924	0.257	0.143	0.310769
Lman1	3.01673e-51	0.130684	0.293	0.149	9.36787e-47		Mafk	5.47328e-09	0.0902906	0.237	0.114	0.000169962		Rhbdl3	1.6001e-05	0.0845692	0.079	0.017	0.49688		Lpin1	6.73631e-29	0.140004	0.067	0.021	2.09183e-24		Abca2	1.00522e-11	0.0768296	0.161	0.079	3.12152e-07		Hells	1.01298e-05	0.12902	0.092	0.035	0.314562
Rpl35	3.09873e-51	0.149084	0.976	0.899	9.62248e-47		Slc30a5	5.48841e-09	0.0871518	0.339	0.178	0.000170431		Psmd14	1.61367e-05	0.205221	0.652	0.359	0.501094		Ddt	7.13024e-29	0.262254	0.252	0.186	2.21415e-24		Mpdu1	1.01093e-11	0.0812329	0.198	0.104	3.13924e-07		Gpr146	1.01619e-05	0.0811491	0.046	0.012	0.315558
Psmb5	4.14963e-51	0.195372	0.788	0.562	1.28859e-46		Drg2	5.49571e-09	0.0942897	0.197	0.089	0.000170658		Ero1l	1.62496e-05	0.203446	0.596	0.329	0.504598		Ostm1	7.33924e-29	0.175268	0.094	0.04	2.27905e-24		Esyt2	1.04902e-11	0.110497	0.327	0.193	3.25753e-07		Rasal3	1.03192e-05	0.167275	0.422	0.268	0.320441
Mrpl38	4.51169e-51	0.121154	0.278	0.139	1.40102e-46		Yif1a	5.6285e-09	0.0748021	0.247	0.119	0.000174782		Gt(ROSA)26Sor	1.69235e-05	0.14752	0.315	0.139	0.525525		Wls	7.99883e-29	0.195175	0.105	0.048	2.48388e-24		Ccdc28a	1.05531e-11	0.0618811	0.088	0.034	3.27705e-07		L3mbtl3	1.03646e-05	0.126919	0.147	0.067	0.321852
Gm14718	4.63015e-51	0.139827	0.119	0.039	1.4378e-46		Serpine1	5.99985e-09	0.0234	0.017	0.002	0.000186313		Mapk1ip1l	1.69527e-05	0.137097	0.517	0.256	0.526432		Mns1	9.07621e-29	0.116675	0.048	0.01	2.81843e-24		C030034L19Rik	1.06189e-11	0.0733958	0.078	0.029	3.2975e-07		Elf1	1.0426e-05	0.198026	0.642	0.472	0.323757
Thoc1	4.94418e-51	0.117331	0.229	0.107	1.53532e-46		Rps5	6.37355e-09	0.0968413	1	1	0.000197918		Gm17509	1.72424e-05	0.0365747	0.034	0.004	0.535429		Coa3	9.22926e-29	0.259029	0.34	0.291	2.86596e-24		Jtb	1.06894e-11	0.147924	0.559	0.389	3.31938e-07		Gm3716	1.04401e-05	0.0195151	0.009	0.001	0.324197
Cyc1	8.01559e-51	0.152664	0.541	0.328	2.48908e-46		Lsm2	6.38714e-09	0.145787	0.576	0.347	0.00019834		Papd7	1.74803e-05	0.109243	0.337	0.148	0.542816		Surf1	1.06802e-28	0.234798	0.153	0.089	3.31653e-24		Fam172a	1.12567e-11	0.120767	0.324	0.196	3.49556e-07		Spsb3	1.04822e-05	0.140191	0.289	0.166	0.325504
Ncbp2	1.62997e-50	0.135399	0.32	0.169	5.06155e-46		Supv3l1	6.41432e-09	0.0894299	0.142	0.058	0.000199184		Uba5	1.75011e-05	0.118603	0.371	0.168	0.543461		Ctps2	1.22437e-28	0.205183	0.144	0.08	3.80203e-24		Hexa	1.19584e-11	0.0617852	0.207	0.108	3.71343e-07		AI429214	1.0487e-05	0.0114372	0.009	0.001	0.325654
Dpagt1	1.65559e-50	0.0939811	0.12	0.039	5.14112e-46		Larp4b	6.65421e-09	0.130994	0.407	0.227	0.000206633		Rpp38	1.77348e-05	0.119246	0.169	0.058	0.550718		Cers4	1.40316e-28	0.238122	0.171	0.104	4.35723e-24		Tmem242	1.26349e-11	0.0567286	0.075	0.027	3.92352e-07		Irf6	1.05578e-05	0.00568834	0.009	0.001	0.327851
Fbxo11	3.86027e-50	0.129831	0.278	0.14	1.19873e-45		Fam220a	6.71692e-09	0.0906168	0.285	0.143	0.000208581		Taf1c	1.79544e-05	0.108894	0.157	0.052	0.557539		Ldb1	1.4296e-28	0.259495	0.239	0.173	4.43935e-24		Pnkd	1.264e-11	0.0609555	0.273	0.152	3.92511e-07		Elmod3	1.05771e-05	0.0611449	0.05	0.014	0.328451
Nmt2	4.07573e-50	0.109797	0.158	0.062	1.26564e-45		Usmg5	6.75173e-09	0.146559	0.692	0.438	0.000209662		Jpt2	1.79945e-05	0.120513	0.157	0.052	0.558784		Spsb2	1.48651e-28	0.127996	0.059	0.017	4.61605e-24		Coq9	1.26592e-11	0.0636583	0.109	0.046	3.93107e-07		Sntb1	1.07335e-05	0.0764151	0.06	0.018	0.333306
Amd2	4.10568e-50	0.103523	0.124	0.042	1.27494e-45		Psmb5	6.86129e-09	0.196303	0.861	0.635	0.000213064		Snrpf	1.81215e-05	0.231158	0.944	0.715	0.562725		Zbtb8os	1.4912e-28	0.274584	0.277	0.216	4.63061e-24		Klhdc2	1.31624e-11	0.138955	0.204	0.113	4.08731e-07		Arhgef6	1.11082e-05	0.145006	0.381	0.229	0.344942
Atl2	4.28878e-50	0.108518	0.131	0.046	1.33179e-45		Nsun5	6.88321e-09	0.103901	0.2	0.091	0.000213744		Tmem165	1.85759e-05	0.167494	0.494	0.251	0.576837		Higd2a	1.53233e-28	0.282088	0.32	0.269	4.75836e-24		Hmgn5	1.38285e-11	0.0968015	0.152	0.075	4.29415e-07		A430110L20Rik	1.13144e-05	0.0389631	0.023	0.004	0.351345
Cdc37	8.0797e-50	0.182778	0.735	0.51	2.50899e-45		Tial1	6.90126e-09	0.108752	0.481	0.272	0.000214305		Fbxw7	1.87124e-05	0.16151	0.36	0.168	0.581077		Pea15a	1.53388e-28	0.148357	0.074	0.026	4.76314e-24		Nmi	1.47362e-11	0.100607	0.412	0.259	4.57604e-07		Gnas	1.13162e-05	0.128714	0.927	0.898	0.351403
Prpf4	1.09395e-49	0.130228	0.253	0.125	3.39705e-45		Gm16853	6.92623e-09	0.0406588	0.031	0.005	0.00021508		Dhrs7b	1.88106e-05	0.110734	0.236	0.093	0.584125		Metrn	1.54441e-28	0.178262	0.097	0.043	4.79587e-24		Uap1l1	1.49566e-11	0.0636845	0.094	0.038	4.64448e-07		H3f3a	1.14036e-05	0.115343	0.982	0.977	0.354115
Prrc2a	1.41817e-49	0.146669	0.416	0.241	4.40385e-45		Rrn3	7.00282e-09	0.106739	0.254	0.127	0.000217459		Naga	1.88275e-05	0.127644	0.191	0.068	0.58465		Crebl2	1.82081e-28	0.122841	0.053	0.013	5.65417e-24		Ugcg	1.51148e-11	0.168971	0.576	0.42	4.69358e-07		Plpp6	1.14166e-05	0.117795	0.11	0.046	0.354521
Dhx9	1.44631e-49	0.164812	0.507	0.308	4.49124e-45		Prr3	7.02971e-09	0.081337	0.203	0.093	0.000218293		Kansl3	1.89189e-05	0.0988171	0.315	0.134	0.587489		Nfic	1.97862e-28	0.154568	0.085	0.033	6.14419e-24		Lin37	1.54515e-11	0.0574827	0.146	0.069	4.79815e-07		Sestd1	1.1506e-05	0.0325607	0.023	0.004	0.357295
Gm49336	2.75411e-49	0.11045	0.175	0.073	8.55233e-45		Tspan3	7.17646e-09	0.14371	0.173	0.078	0.000222851		Tfb2m	1.90092e-05	0.138982	0.27	0.113	0.590294		Rpl27	2.34266e-28	0.155434	0.848	0.91	7.27465e-24		Rap1gap2	1.58766e-11	0.0338006	0.026	0.005	4.93016e-07		Nlk	1.1546e-05	0.150392	0.294	0.172	0.358539
Zfp281	4.06018e-49	0.131777	0.287	0.148	1.26081e-44		Stx11	7.29841e-09	0.109675	0.244	0.119	0.000226637		Eri1	1.94196e-05	0.169658	0.416	0.203	0.603037		Letm2	2.35801e-28	0.183992	0.096	0.042	7.32232e-24		Hmgn3	1.61655e-11	0.0235767	0.014	0.001	5.01987e-07		Dnajc4	1.15919e-05	0.10296	0.183	0.091	0.359964
Zbtb21	4.5314e-49	0.102857	0.109	0.034	1.40714e-44		Rpn1	7.42627e-09	0.131614	0.522	0.309	0.000230608		Rpf2	1.95883e-05	0.153124	0.483	0.24	0.608275		Crbn	2.49027e-28	0.274748	0.215	0.151	7.73305e-24		Cep164	1.63892e-11	0.0511782	0.155	0.074	5.08934e-07		Atxn7	1.16631e-05	0.165797	0.243	0.137	0.362175
Gng12	5.42214e-49	0.117065	0.18	0.077	1.68374e-44		Actl6a	7.43902e-09	0.129217	0.6	0.358	0.000231004		Zfp599	1.96963e-05	0.109552	0.101	0.026	0.61163		Mettl26	2.57473e-28	0.261443	0.221	0.155	7.99532e-24		Lnpep	1.67905e-11	0.118893	0.353	0.218	5.21394e-07		Dscr3	1.16895e-05	0.133263	0.138	0.063	0.362993
Tnfsf11	5.68116e-49	0.149577	0.189	0.084	1.76417e-44		Zfp703	7.59936e-09	0.10168	0.149	0.062	0.000235983		Gars	1.98287e-05	0.183589	0.416	0.206	0.61574		Fam160b1	2.87139e-28	0.222192	0.136	0.074	8.91653e-24		Ppp3ca	1.69751e-11	0.129952	0.425	0.274	5.27126e-07		Prkcz	1.17107e-05	0.158885	0.161	0.077	0.363652
Rbpms2	5.68794e-49	0.0771272	0.046	0.004	1.76627e-44		Mrps25	7.6207e-09	0.1467	0.424	0.247	0.000236645		Parl	2.00775e-05	0.158165	0.528	0.272	0.623468		Gpn3	2.96053e-28	0.212552	0.137	0.075	9.19334e-24		Acads	1.76673e-11	0.0721724	0.195	0.101	5.48621e-07		Syt11	1.18453e-05	0.088327	0.073	0.025	0.367832
Zbtb10	9.55056e-49	0.0929751	0.101	0.029	2.96574e-44		Basp1	7.64017e-09	0.0890536	0.061	0.016	0.00023725		Tfdp1	2.01937e-05	0.152153	0.303	0.135	0.627075		Svbp	3.06695e-28	0.282757	0.262	0.201	9.5238e-24		Bod1l	1.86429e-11	0.116635	0.553	0.384	5.78917e-07		Gm26551	1.19997e-05	0.065104	0.05	0.014	0.372627
Chchd1	9.66154e-49	0.166322	0.586	0.372	3.0002e-44		Cxcr4	7.68734e-09	0.0669479	0.071	0.021	0.000238715		Epop	2.02454e-05	0.200433	0.348	0.168	0.62868		Rnf38	3.28409e-28	0.204116	0.117	0.059	1.01981e-23		Strada	1.87794e-11	0.0524273	0.084	0.032	5.83157e-07		Cdpf1	1.20142e-05	0.146062	0.174	0.088	0.373078
Pole3	9.67689e-49	0.11005	0.209	0.095	3.00496e-44		Nab1	7.79066e-09	0.133604	0.407	0.233	0.000241923		Tars	2.0304e-05	0.274645	0.494	0.275	0.6305		Cep120	3.48832e-28	0.137173	0.068	0.023	1.08323e-23		Rnf41	1.91296e-11	0.0695799	0.109	0.047	5.94032e-07		Plekhg3	1.20202e-05	0.0704071	0.064	0.02	0.373264
Taf5l	9.8217e-49	0.122893	0.211	0.097	3.04993e-44		Rpl7a	8.01324e-09	0.119275	1	0.985	0.000248835		Idh3a	2.03818e-05	0.191407	0.551	0.286	0.632916		Ing4	3.65093e-28	0.246119	0.173	0.108	1.13372e-23		Fbxl6	1.94215e-11	0.0944306	0.238	0.134	6.03096e-07		Dnajc5	1.23275e-05	0.187542	0.404	0.278	0.382807
Mrpl32	1.15028e-48	0.150751	0.518	0.314	3.57198e-44		Prkch	8.02391e-09	0.175913	0.664	0.431	0.000249166		Id1	2.04108e-05	0.0906275	0.045	0.007	0.633816		Avl9	3.73202e-28	0.294198	0.273	0.218	1.1589e-23		Auh	1.94984e-11	0.06764	0.207	0.109	6.05483e-07		Ebpl	1.23302e-05	0.114591	0.22	0.115	0.382891
E2f4	1.22085e-48	0.114505	0.28	0.142	3.79111e-44		Yars	8.18305e-09	0.0904133	0.183	0.082	0.000254108		Prmt7	2.06856e-05	0.126192	0.27	0.113	0.642351		Prkcq	3.86285e-28	0.252187	0.364	0.305	1.19953e-23		Tm2d2	1.99106e-11	0.08467	0.203	0.107	6.18283e-07		Phactr4	1.23381e-05	0.0732557	0.078	0.027	0.383136
Scap	1.51056e-48	0.126557	0.195	0.087	4.69073e-44		Wdr55	8.28391e-09	0.139678	0.302	0.164	0.00025724		Klf4	2.09732e-05	0.0999731	0.09	0.022	0.651281		Lsm5	5.23217e-28	0.288318	0.358	0.324	1.62475e-23		Raf1	2.06805e-11	0.120041	0.307	0.185	6.4219e-07		Bphl	1.23634e-05	0.0926839	0.128	0.056	0.383919
Ptpn4	1.98205e-48	0.119393	0.158	0.063	6.15487e-44		Gnpnat1	8.33128e-09	0.133501	0.417	0.238	0.000258711		Rps27a	2.10224e-05	0.105938	1	1	0.652809		Emb	5.25352e-28	0.257241	0.415	0.355	1.63137e-23		Synj1	2.09041e-11	0.0778747	0.158	0.078	6.49135e-07		Lamtor4	1.2454e-05	0.1587	0.495	0.324	0.386736
Slc30a5	2.24218e-48	0.126883	0.269	0.137	6.96263e-44		Wdr5	8.46455e-09	0.132625	0.244	0.124	0.00026285		Lonp1	2.14186e-05	0.120044	0.258	0.106	0.665111		Rpl36	5.32048e-28	0.0942247	0.986	0.998	1.65217e-23		Gm15417	2.09788e-11	0.0453305	0.061	0.02	6.51454e-07		Eipr1	1.26768e-05	0.118386	0.147	0.069	0.393651
Pam16	3.56495e-48	0.130419	0.391	0.221	1.10702e-43		Arl5a	8.69059e-09	0.101634	0.268	0.135	0.000269869		Pfdn4	2.18177e-05	0.245648	0.618	0.36	0.677505		Klhl6	5.49515e-28	0.223132	0.176	0.107	1.70641e-23		Tor2a	2.10873e-11	0.0797031	0.25	0.138	6.54823e-07		Atp6v1h	1.27306e-05	0.169664	0.284	0.17	0.395324
Atp13a3	4.15185e-48	0.117559	0.325	0.174	1.28927e-43		Txndc17	8.73087e-09	0.165691	0.661	0.429	0.00027112		Hira	2.24037e-05	0.104641	0.191	0.07	0.695703		Ldhb	5.60053e-28	0.256475	0.167	0.101	1.73913e-23		Mrps21	2.1197e-11	0.142375	0.439	0.291	6.58231e-07		Man2a2	1.31196e-05	0.187403	0.243	0.14	0.407401
Polr2k	7.30496e-48	0.138763	0.455	0.269	2.26841e-43		Pole4	8.91073e-09	0.167697	0.702	0.455	0.000276705		Sidt2	2.24087e-05	0.147778	0.393	0.183	0.695857		Snapin	5.69359e-28	0.207682	0.13	0.069	1.76803e-23		Anp32a	2.19888e-11	0.142258	0.697	0.517	6.82819e-07		Ccdc93	1.3191e-05	0.0985882	0.115	0.048	0.40962
Srp68	7.86126e-48	0.117822	0.256	0.127	2.44116e-43		Sik3	8.93946e-09	0.111886	0.271	0.139	0.000277597		Pus7l	2.25259e-05	0.0841659	0.18	0.063	0.699496		Cnppd1	5.7666e-28	0.237721	0.161	0.098	1.7907e-23		Dph5	2.22777e-11	0.114999	0.28	0.166	6.91789e-07		Ankfy1	1.33212e-05	0.135371	0.193	0.099	0.413663
Senp6	8.02719e-48	0.161971	0.748	0.516	2.49268e-43		Hnrnpa2b1	8.96169e-09	0.148678	0.983	0.893	0.000278287		Vegfa	2.31433e-05	0.0239828	0.034	0.004	0.71867		Ppp3cb	6.37278e-28	0.264345	0.234	0.169	1.97894e-23		Lgals8	2.31661e-11	0.0586597	0.155	0.075	7.19378e-07		Pcsk7	1.33901e-05	0.123645	0.211	0.11	0.415804
Ago2	1.01095e-47	0.1452	0.504	0.304	3.13932e-43		Cul2	9.03212e-09	0.104174	0.214	0.101	0.000280474		Nfe2l1	2.31997e-05	0.107868	0.337	0.149	0.720419		Ms4a6c	6.4694e-28	0.166889	0.086	0.035	2.00894e-23		Mospd3	2.34315e-11	0.0656855	0.111	0.048	7.27618e-07		D10Jhu81e	1.37018e-05	0.13051	0.243	0.134	0.425482
Rbm19	1.01717e-47	0.0875048	0.115	0.038	3.15862e-43		Gng12	9.07599e-09	0.0864589	0.227	0.109	0.000281837		Acy1	2.3372e-05	0.0490485	0.067	0.014	0.725769		Add1	7.48954e-28	0.210936	0.158	0.091	2.32573e-23		Was	2.38582e-11	0.0871078	0.429	0.267	7.4087e-07		Zfp637	1.38023e-05	0.100819	0.11	0.046	0.428602
Nab1	1.37674e-47	0.158957	0.334	0.187	4.2752e-43		Anxa5	9.09793e-09	0.0807973	0.132	0.052	0.000282518		Trnt1	2.34284e-05	0.210213	0.438	0.227	0.727522		Dctn6	8.02244e-28	0.25065	0.208	0.141	2.49121e-23		Alkbh7	2.38864e-11	0.0759135	0.164	0.082	7.41744e-07		Tmem154	1.39062e-05	0.126513	0.271	0.15	0.431828
Dnaja3	1.63733e-47	0.10896	0.203	0.092	5.08439e-43		Galk1	9.15493e-09	0.11158	0.251	0.126	0.000284288		Nf1	2.3643e-05	0.0913968	0.135	0.042	0.734185		Tcrg-C4	8.11973e-28	0.211834	0.176	0.103	2.52142e-23		Csnk1g2	2.44529e-11	0.078407	0.479	0.304	7.59336e-07		Mgat4a	1.39081e-05	0.153889	0.229	0.126	0.431887
Acsl3	1.95585e-47	0.0946151	0.09	0.025	6.0735e-43		Rbm27	9.64305e-09	0.11422	0.451	0.264	0.000299446		Atg16l1	2.38037e-05	0.10852	0.315	0.136	0.739176		Zkscan14	8.74245e-28	0.147115	0.071	0.025	2.71479e-23		Trim35	2.46768e-11	0.104952	0.293	0.173	7.66288e-07		Malat1	1.39663e-05	0.111281	1	1	0.433697
Mad2l2	2.001e-47	0.10401	0.142	0.054	6.21371e-43		Faap100	9.67959e-09	0.0705765	0.166	0.071	0.00030058		Mapk11	2.3849e-05	0.0779866	0.079	0.018	0.740584		Exoc7	1.08556e-27	0.173689	0.107	0.051	3.371e-23		Dzip1	2.48792e-11	0.079164	0.138	0.065	7.72574e-07		Ddx6	1.40376e-05	0.172356	0.619	0.463	0.435908
Serpina3f	3.38475e-47	0.3195	0.201	0.096	1.05107e-42		Atad1	9.87082e-09	0.112532	0.407	0.228	0.000306519		Ube2e1	2.38625e-05	0.197326	0.674	0.387	0.741001		Cyhr1	1.18428e-27	0.268336	0.209	0.146	3.67755e-23		Ggact	2.53561e-11	0.0557797	0.075	0.028	7.87383e-07		Gm26615	1.40695e-05	0.0505206	0.037	0.008	0.4369
Fam84b	4.71936e-47	0.0984313	0.084	0.022	1.4655e-42		Diaph2	1.00519e-08	0.0731994	0.119	0.045	0.000312143		Trmt61a	2.3971e-05	0.218634	0.315	0.15	0.744371		Map3k4	1.25989e-27	0.165236	0.086	0.035	3.91234e-23		Ankmy2	2.56011e-11	0.0729717	0.183	0.093	7.9499e-07		Fgfr1op2	1.4107e-05	0.164298	0.523	0.365	0.438065
Xrn2	4.93216e-47	0.152903	0.635	0.415	1.53158e-42		Lzic	1.00824e-08	0.0927152	0.342	0.183	0.00031309		Xrn2	2.42836e-05	0.230805	0.764	0.489	0.754078		mt-Nd1	1.293e-27	0.0896056	0.993	0.999	4.01516e-23		Traf7	2.60065e-11	0.099062	0.187	0.099	8.0758e-07		Phkg2	1.4176e-05	0.141801	0.165	0.082	0.440208
Acot7	7.01055e-47	0.137168	0.301	0.162	2.17699e-42		Ssr1	1.01619e-08	0.143887	0.647	0.401	0.000315558		Sult2b1	2.43064e-05	0.103094	0.258	0.105	0.754786		Leng9	1.43141e-27	0.177389	0.096	0.043	4.44495e-23		Fam53a	2.63736e-11	0.0937146	0.258	0.147	8.18978e-07		Cap2	1.42364e-05	0.0770166	0.069	0.023	0.442084
Abracl	1.06704e-46	0.164648	0.881	0.708	3.31349e-42		Mrps10	1.02627e-08	0.101719	0.315	0.165	0.000318688		Sh3rf1	2.44659e-05	0.0827795	0.124	0.037	0.75974		Arid4b	1.48407e-27	0.306457	0.426	0.409	4.60847e-23		Prmt9	2.66105e-11	0.0663769	0.114	0.05	8.26334e-07		Pstpip1	1.42407e-05	0.157712	0.339	0.205	0.442216
Pdcd6	1.13807e-46	0.169729	0.644	0.427	3.53403e-42		Polr3k	1.05114e-08	0.0993652	0.4	0.221	0.000326412		Mex3c	2.46101e-05	0.220072	0.27	0.117	0.764217		Tmem9	1.62902e-27	0.124006	0.059	0.018	5.0586e-23		Tmem219	2.71104e-11	0.0929267	0.194	0.102	8.41858e-07		Ldb1	1.44583e-05	0.162207	0.335	0.205	0.448973
Kcnk5	1.41099e-46	0.108455	0.108	0.035	4.38156e-42		Zcrb1	1.0525e-08	0.151387	0.637	0.397	0.000326832		Mrps12	2.47323e-05	0.225397	0.562	0.308	0.768012		Osbpl3	1.72052e-27	0.165214	0.09	0.038	5.34273e-23		Eif3e	2.74253e-11	0.142798	0.903	0.824	8.51637e-07		Arhgap4	1.46354e-05	0.157784	0.239	0.131	0.454472
Chka	2.24608e-46	0.110876	0.136	0.052	6.97475e-42		Ccl20	1.06325e-08	0.124564	0.003	0	0.000330171		Cul1	2.47721e-05	0.15717	0.483	0.243	0.769248		Ppp4r3b	1.79243e-27	0.294428	0.364	0.327	5.56605e-23		Zmynd8	2.81117e-11	0.0716566	0.339	0.199	8.72952e-07		Parp11	1.4676e-05	0.119264	0.165	0.081	0.455735
Lonrf1	2.34096e-46	0.0721391	0.055	0.008	7.26938e-42		Prlh	1.06325e-08	0.0105342	0.003	0	0.000330171		Wdr45b	2.52985e-05	0.0965796	0.292	0.123	0.785595		Retreg3	1.80314e-27	0.218514	0.127	0.068	5.59928e-23		Cd2	2.81795e-11	0.114328	0.656	0.462	8.75058e-07		Fuca2	1.48254e-05	0.115732	0.156	0.074	0.460373
Gm26825	4.30186e-46	0.0740517	0.07	0.015	1.33586e-41		Gm20560	1.06325e-08	0.00973831	0.003	0	0.000330171		Psmc5	2.57532e-05	0.201299	0.685	0.387	0.799713		Aaed1	1.87368e-27	0.168334	0.084	0.034	5.81833e-23		Fam49a	2.8391e-11	0.0697301	0.149	0.072	8.81626e-07		BC004004	1.49572e-05	0.1522	0.22	0.121	0.464466
Sec13	4.33207e-46	0.122628	0.346	0.192	1.34524e-41		Gm17103	1.06325e-08	0.00973831	0.003	0	0.000330171		Tmbim1	2.57819e-05	0.103431	0.135	0.042	0.800604		Ap5m1	1.9671e-27	0.190845	0.114	0.057	6.10845e-23		Dennd4c	2.84188e-11	0.0810943	0.233	0.129	8.82489e-07		1110034G24Rik	1.50814e-05	0.128014	0.151	0.072	0.468322
Trmt1	4.38961e-46	0.142173	0.254	0.131	1.36311e-41		Gm43409	1.06325e-08	0.00905785	0.003	0	0.000330171		Cyp51	2.63653e-05	0.149195	0.281	0.123	0.81872		Sh3pxd2a	2.14595e-27	0.133806	0.064	0.02	6.6638e-23		Rab1b	2.929e-11	0.104363	0.272	0.158	9.09543e-07		Frrs1	1.54158e-05	0.177088	0.138	0.065	0.478707
Ddx31	5.69623e-46	0.0972388	0.141	0.054	1.76885e-41		Galnt14	1.06325e-08	0.00841373	0.003	0	0.000330171		Hmgn3	2.64359e-05	0.0266508	0.022	0.002	0.820913		Snx6	2.17492e-27	0.277141	0.27	0.212	6.75379e-23		Gtf2a2	2.9413e-11	0.108972	0.488	0.326	9.13361e-07		Anxa2	1.55344e-05	0.140755	0.106	0.044	0.48239
Sacs	6.05316e-46	0.124094	0.219	0.105	1.87969e-41		Gm38335	1.06325e-08	0.00812144	0.003	0	0.000330171		Prps1l3	2.65198e-05	0.0749186	0.213	0.08	0.82352		Ttc14	2.21927e-27	0.265805	0.501	0.511	6.8915e-23		Cmc2	2.9762e-11	0.090274	0.289	0.169	9.24198e-07		Tpbgl	1.55374e-05	0.046957	0.032	0.007	0.482482
Psmc2	6.98591e-46	0.149918	0.546	0.339	2.16934e-41		Rhobtb3	1.06325e-08	0.00812144	0.003	0	0.000330171		Xbp1	2.66235e-05	0.259017	0.584	0.353	0.82674		Cytip	2.22622e-27	0.193546	0.389	0.318	6.91308e-23		Coa3	2.99451e-11	0.116416	0.465	0.306	9.29885e-07		Nek1	1.56314e-05	0.08188	0.073	0.025	0.485402
Rpia	7.40836e-46	0.120976	0.297	0.158	2.30052e-41		Tmem217	1.06325e-08	0.00752138	0.003	0	0.000330171		C86187	2.69305e-05	0.0239422	0.022	0.002	0.836272		Kidins220	2.36705e-27	0.232799	0.164	0.1	7.35039e-23		Parp8	3.05061e-11	0.0695913	0.22	0.119	9.47306e-07		Siae	1.57757e-05	0.090099	0.092	0.035	0.489884
D17Wsu92e	7.44322e-46	0.112303	0.294	0.155	2.31134e-41		Dlx6	1.06325e-08	0.00704318	0.003	0	0.000330171		Phkg1	2.6986e-05	0.0202103	0.022	0.002	0.837995		Fam120b	2.36922e-27	0.241855	0.157	0.094	7.35713e-23		Gm49004	3.07426e-11	0.0091017	0.006	0	9.54651e-07		Commd4	1.58889e-05	0.161533	0.339	0.209	0.493397
Wsb2	7.88139e-46	0.133258	0.243	0.123	2.44741e-41		Gm13652	1.06325e-08	0.00698656	0.003	0	0.000330171		Gm43672	2.70326e-05	0.0769798	0.09	0.022	0.839442		Dapk2	2.70426e-27	0.0866262	0.033	0.003	8.39753e-23		Lonp2	3.12025e-11	0.083752	0.273	0.156	9.68931e-07		Nrm	1.61432e-05	0.0735657	0.073	0.025	0.501294
9430038I01Rik	8.57044e-46	0.0948341	0.14	0.054	2.66138e-41		Fgf20	1.06325e-08	0.00682617	0.003	0	0.000330171		Atad1	2.74038e-05	0.167743	0.461	0.231	0.850969		Katnb1	2.90806e-27	0.134528	0.063	0.02	9.03041e-23		Slc36a3os	3.12707e-11	0.0373494	0.02	0.003	9.7105e-07		Fuca1	1.6497e-05	0.135007	0.289	0.166	0.512281
Gm14005	9.12559e-46	0.0752328	0.064	0.012	2.83377e-41		Prelid3a	1.06325e-08	0.00682617	0.003	0	0.000330171		Alyref	2.76163e-05	0.206061	0.674	0.398	0.857569		Sirt5	2.98995e-27	0.138473	0.07	0.024	9.28469e-23		Psenen	3.19483e-11	0.119326	0.654	0.48	9.92089e-07		Smim15	1.65274e-05	0.152738	0.335	0.204	0.513227
Vps54	9.35574e-46	0.127889	0.205	0.096	2.90524e-41		Olfr1247	1.06325e-08	0.00678654	0.003	0	0.000330171		Isg20l2	2.82269e-05	0.161616	0.315	0.143	0.876529		A430078G23Rik	3.08368e-27	0.177615	0.107	0.051	9.57575e-23		Tcrg-V1	3.19584e-11	0.0398846	0.037	0.009	9.92406e-07		Lamp2	1.65503e-05	0.136377	0.197	0.105	0.513938
Ddx54	9.665e-46	0.119798	0.427	0.249	3.00127e-41		Dlgap1	1.06325e-08	0.00675544	0.003	0	0.000330171		Szrd1	2.8228e-05	0.152333	0.427	0.21	0.876564		Tmx4	3.19397e-27	0.202128	0.108	0.053	9.91824e-23		Actg1	3.24264e-11	0.150672	0.994	0.984	1.00694e-06		Supt4a	1.65504e-05	0.160249	0.693	0.545	0.513941
Creld2	1.11096e-45	0.12661	0.192	0.088	3.44985e-41		Klra2	1.06325e-08	0.00658228	0.003	0	0.000330171		Rarg	2.82308e-05	0.120612	0.157	0.053	0.876652		Fam8a1	3.53638e-27	0.213299	0.131	0.071	1.09815e-22		Sec11a	3.24439e-11	0.149751	0.704	0.53	1.00748e-06		Camk4	1.68339e-05	0.198829	0.486	0.343	0.522743
Gpn1	1.12345e-45	0.111507	0.264	0.135	3.48864e-41		Tcea3	1.06325e-08	0.00658228	0.003	0	0.000330171		Gpr89	2.83582e-05	0.150665	0.213	0.084	0.880607		Neat1	3.85731e-27	0.254443	0.229	0.161	1.19781e-22		Gpbp1l1	3.39732e-11	0.136011	0.324	0.202	1.05497e-06		Atp8b2	1.69391e-05	0.0835639	0.119	0.051	0.526011
Slc2a1	1.6455e-45	0.108726	0.157	0.065	5.10976e-41		Pcdh10	1.06325e-08	0.00623024	0.003	0	0.000330171		Trub2	2.83941e-05	0.108341	0.169	0.059	0.881723		Glipr2	3.94997e-27	0.188234	0.115	0.058	1.22658e-22		Arpc5l	3.52647e-11	0.114913	0.619	0.441	1.09507e-06		Myo1g	1.70953e-05	0.169765	0.229	0.129	0.53086
Rab8b	1.80586e-45	0.200675	0.551	0.362	5.60772e-41		Retn	1.06325e-08	0.00615893	0.003	0	0.000330171		Txndc9	2.84331e-05	0.148258	0.584	0.304	0.882934		Nt5dc1	3.98834e-27	0.236517	0.161	0.099	1.2385e-22		Cmc4	3.60709e-11	0.0791826	0.101	0.043	1.12011e-06		Gm30373	1.74009e-05	0.0456935	0.041	0.01	0.540349
Huwe1	1.86491e-45	0.147151	0.481	0.295	5.7911e-41		Gm43069	1.06325e-08	0.00612664	0.003	0	0.000330171		Rpl7l1	2.85397e-05	0.258363	0.697	0.441	0.886242		Nsd3	4.16529e-27	0.258877	0.37	0.323	1.29345e-22		Klk8	3.61544e-11	0.140475	0.599	0.435	1.1227e-06		Tor1aip2	1.75901e-05	0.177794	0.22	0.123	0.546226
Eftud2	2.36129e-45	0.111021	0.301	0.161	7.3325e-41		C330018A13Rik	1.06325e-08	0.005986	0.003	0	0.000330171		Tmem129	2.86403e-05	0.0436083	0.101	0.026	0.889366		Tagln2	5.04175e-27	0.221973	0.532	0.517	1.56561e-22		Commd4	3.63661e-11	0.0808537	0.339	0.203	1.12928e-06		Gmnn	1.7658e-05	0.0961922	0.133	0.06	0.548335
Pigf	2.93657e-45	0.102617	0.189	0.085	9.11892e-41		A430034D21Rik	1.06325e-08	0.00586787	0.003	0	0.000330171		Gsto1	2.86552e-05	0.119657	0.337	0.152	0.88983		Trappc2l	5.04515e-27	0.277843	0.255	0.195	1.56667e-22		Srrt	3.65247e-11	0.0906337	0.304	0.181	1.1342e-06		Gtf2h4	1.76923e-05	0.130926	0.147	0.071	0.549398
Arl5a	3.03063e-45	0.111644	0.212	0.101	9.41101e-41		Gm20658	1.06325e-08	0.00581752	0.003	0	0.000330171		Csnk2a1	2.86904e-05	0.135771	0.416	0.2	0.890924		Abtb1	5.37009e-27	0.155159	0.078	0.03	1.66758e-22		Sertad3	3.65833e-11	0.0573714	0.118	0.052	1.13602e-06		Krt83	1.78438e-05	0.134267	0.11	0.047	0.554105
Med7	3.31286e-45	0.0958766	0.127	0.047	1.02874e-40		Msr1	1.06325e-08	0.00560124	0.003	0	0.000330171		Rybp	2.87341e-05	0.136361	0.27	0.115	0.892279		Rmdn2	6.80957e-27	0.14985	0.077	0.029	2.11457e-22		Calm3	3.66636e-11	0.138459	0.664	0.482	1.13851e-06		Arrb2	1.78936e-05	0.115693	0.211	0.111	0.555649
Dnajb6	3.58537e-45	0.164743	0.709	0.481	1.11336e-40		Gm39822	1.06325e-08	0.005429	0.003	0	0.000330171		Rpgrip1	2.89637e-05	0.12031	0.292	0.125	0.899409		Use1	6.91049e-27	0.279057	0.461	0.469	2.14592e-22		Fbxl20	3.7377e-11	0.0730116	0.141	0.067	1.16067e-06		Sesn1	1.83641e-05	0.1471	0.344	0.209	0.57026
Nup153	3.60662e-45	0.122586	0.349	0.196	1.11996e-40		Gldc	1.06325e-08	0.0054039	0.003	0	0.000330171		Stt3a	2.93343e-05	0.165966	0.573	0.302	0.910918		Tmem191c	7.52108e-27	0.163182	0.09	0.039	2.33552e-22		Galnt1	3.86167e-11	0.106832	0.37	0.232	1.19916e-06		Chmp1a	1.84539e-05	0.157834	0.33	0.203	0.57305
Fgfr1op	4.6341e-45	0.104964	0.154	0.064	1.43903e-40		Procr	1.06325e-08	0.00525072	0.003	0	0.000330171		Gpam	3.00538e-05	0.0331982	0.034	0.004	0.933261		Ccdc92	8.04795e-27	0.10087	0.044	0.009	2.49913e-22		Pxmp4	3.86257e-11	0.0556159	0.08	0.03	1.19945e-06		Cmah	1.85766e-05	0.0804171	0.064	0.021	0.576859
Ywhaq	5.77374e-45	0.165536	0.698	0.477	1.79292e-40		Pstpip2	1.06325e-08	0.00525072	0.003	0	0.000330171		U2surp	3.05791e-05	0.262144	0.753	0.469	0.949572		Bphl	8.07397e-27	0.149687	0.081	0.032	2.50721e-22		Mob3a	3.86849e-11	0.0551416	0.237	0.128	1.20128e-06		Gm9958	1.87078e-05	0.0605852	0.037	0.009	0.580933
Mid1	7.31257e-45	0.0914788	0.084	0.023	2.27077e-40		Rtkn2	1.06325e-08	0.00497777	0.003	0	0.000330171		Stard3	3.07807e-05	0.137764	0.326	0.147	0.955833		Pcnt	8.17266e-27	0.178564	0.106	0.05	2.53786e-22		Hsd11b1	3.89401e-11	0.0908923	0.284	0.163	1.20921e-06		Ten1	1.88257e-05	0.134002	0.257	0.144	0.584595
Gbp3	7.80977e-45	0.175674	0.162	0.07	2.42517e-40		Gpr150	1.06325e-08	0.00495232	0.003	0	0.000330171		Sf1	3.08042e-05	0.188844	0.584	0.319	0.956564		Ccser2	1.04579e-26	0.183444	0.1	0.047	3.2475e-22		Eipr1	3.96897e-11	0.0632132	0.138	0.066	1.23248e-06		Calm3	1.88316e-05	0.20783	0.624	0.491	0.584778
Tex10	8.40532e-45	0.0984581	0.218	0.104	2.6101e-40		Tvp23a	1.06325e-08	0.00482611	0.003	0	0.000330171		Fryl	3.11117e-05	0.151295	0.483	0.241	0.966113		Ndufs2	1.07832e-26	0.282159	0.323	0.279	3.3485e-22		Hdac8	3.98361e-11	0.0560595	0.081	0.031	1.23703e-06		Tcp11l2	1.89282e-05	0.137638	0.211	0.111	0.587777
Dcaf13	9.42411e-45	0.111136	0.345	0.191	2.92647e-40		Itgb8	1.06325e-08	0.00476573	0.003	0	0.000330171		Nasp	3.13084e-05	0.195107	0.618	0.348	0.972219		Eapp	1.0925e-26	0.276476	0.274	0.217	3.39253e-22		Xlr4b	3.98703e-11	0.10109	0.293	0.174	1.23809e-06		Ift20	1.89579e-05	0.169102	0.495	0.34	0.5887
Hspa14	9.76652e-45	0.148698	0.435	0.264	3.0328e-40		Zfp853	1.06325e-08	0.00475103	0.003	0	0.000330171		Eif4h	3.14364e-05	0.208481	0.764	0.469	0.976194		Smpd5	1.34832e-26	0.110754	0.046	0.011	4.18693e-22		Mmgt2	4.01944e-11	0.0787432	0.187	0.098	1.24816e-06		Plekho1	1.89743e-05	0.0544788	0.046	0.012	0.589208
Pgm3	9.93763e-45	0.104485	0.147	0.059	3.08593e-40		Gm38251	1.06325e-08	0.00471207	0.003	0	0.000330171		Cnih4	3.16003e-05	0.255904	0.483	0.269	0.981283		H2-DMa	1.35863e-26	0.154042	0.087	0.037	4.21896e-22		Nckap1l	4.20938e-11	0.0750851	0.252	0.141	1.30714e-06		Zfp459	1.90084e-05	0.0436811	0.032	0.007	0.590269
Gm10053	1.05113e-44	0.082315	0.077	0.019	3.26408e-40		4931429L15Rik	1.06325e-08	0.00464746	0.003	0	0.000330171		Prpf31	3.22409e-05	0.160864	0.528	0.274	1		Rps6	1.38263e-26	0.0716391	0.998	1	4.29348e-22		Impa2	4.21275e-11	0.048726	0.109	0.047	1.30818e-06		Polg2	1.90263e-05	0.0830482	0.096	0.038	0.590824
Txndc17	1.0663e-44	0.155931	0.568	0.365	3.31118e-40		Gm26873	1.06325e-08	0.00462401	0.003	0	0.000330171		Serinc1	3.228e-05	0.178042	0.461	0.242	1		Tfdp2	1.39254e-26	0.143117	0.073	0.027	4.32426e-22		Ikbke	4.29221e-11	0.088794	0.161	0.081	1.33286e-06		Arhgap5	1.91738e-05	0.186482	0.17	0.087	0.595404
Larp7	1.07046e-44	0.114283	0.283	0.15	3.32409e-40		Abhd12b	1.06325e-08	0.00459704	0.003	0	0.000330171		Ap1ar	3.24637e-05	0.128765	0.348	0.159	1		Kdm5d	1.54632e-26	0.211591	0.136	0.076	4.8018e-22		Dnajc9	4.39739e-11	0.0939784	0.309	0.182	1.36552e-06		4930532G15Rik	1.91814e-05	0.0869912	0.069	0.023	0.595641
Emc4	1.29748e-44	0.107407	0.308	0.166	4.02907e-40		Tmem125	1.06325e-08	0.00456424	0.003	0	0.000330171		Zfp106	3.2581e-05	0.1603	0.483	0.253	1		Washc2	1.63609e-26	0.236402	0.158	0.096	5.08055e-22		Trim30a	4.51918e-11	0.0986755	0.352	0.216	1.40334e-06		Erlec1	1.92059e-05	0.134548	0.248	0.138	0.5964
Cars	2.3239e-44	0.0979049	0.119	0.042	7.21641e-40		Krt18	1.06325e-08	0.00455381	0.003	0	0.000330171		Ube2d3	3.27213e-05	0.23983	0.989	0.873	1		Fbxw4	1.71213e-26	0.165503	0.09	0.039	5.31667e-22		Cep192	4.68287e-11	0.0814506	0.238	0.133	1.45417e-06		Lims1	1.92591e-05	0.184924	0.344	0.216	0.598052
Rwdd1	3.75201e-44	0.181734	0.628	0.422	1.16511e-39		Platr22	1.06325e-08	0.00454222	0.003	0	0.000330171		Nfyb	3.30393e-05	0.187925	0.416	0.213	1		Phf20l1	1.80357e-26	0.284134	0.334	0.287	5.60064e-22		Gm20163	4.79524e-11	0.0170498	0.011	0.001	1.48907e-06		Map3k10	1.94654e-05	0.0830434	0.087	0.033	0.604458
Xpo4	4.10071e-44	0.115261	0.227	0.112	1.27339e-39		Gulo	1.06325e-08	0.00450659	0.003	0	0.000330171		H3f3a	3.3461e-05	0.164223	1	0.977	1		Mpst	1.83783e-26	0.167048	0.097	0.044	5.707e-22		Acyp1	4.86482e-11	0.0976502	0.361	0.221	1.51067e-06		Zfp169	1.95805e-05	0.0872199	0.064	0.021	0.608033
Thap12	4.66533e-44	0.119929	0.267	0.14	1.44873e-39		4930595D18Rik	1.06325e-08	0.00445799	0.003	0	0.000330171		Ak7	3.35012e-05	0.085536	0.067	0.014	1		Kctd12	1.87399e-26	0.231738	0.216	0.148	5.8193e-22		Cog5	4.87255e-11	0.0647877	0.149	0.073	1.51307e-06		2900093K20Rik	1.96118e-05	0.0618285	0.046	0.012	0.609005
Ube2v2	5.59251e-44	0.12697	0.48	0.29	1.73664e-39		4930442L01Rik	1.06325e-08	0.00445155	0.003	0	0.000330171		Kctd9	3.37513e-05	0.0612267	0.09	0.022	1		Trip12	1.88487e-26	0.3018	0.344	0.304	5.85307e-22		Gcc2	4.89222e-11	0.0864297	0.296	0.174	1.51918e-06		Sec14l1	1.96423e-05	0.118301	0.151	0.074	0.609953
Senp3	6.21101e-44	0.105755	0.171	0.075	1.92871e-39		Prm2	1.06325e-08	0.0044498	0.003	0	0.000330171		Tbrg4	3.3996e-05	0.146141	0.247	0.102	1		Taok2	2.04243e-26	0.182029	0.108	0.053	6.34235e-22		Kcnk7	4.89966e-11	0.0325589	0.037	0.009	1.52149e-06		Gm8013	1.97615e-05	0.0253825	0.018	0.003	0.613655
Tmem147	6.33019e-44	0.126433	0.38	0.22	1.96572e-39		B230118H07Rik	1.06325e-08	0.00443409	0.003	0	0.000330171		Sfr1	3.40271e-05	0.262197	0.775	0.512	1		Rfxank	2.07533e-26	0.135758	0.068	0.024	6.44451e-22		Foxo1	4.91405e-11	0.112858	0.261	0.154	1.52596e-06		Wwp2	2.00645e-05	0.125579	0.161	0.079	0.623063
Pank3	8.27329e-44	0.101475	0.207	0.098	2.56911e-39		4930572G02Rik	1.06325e-08	0.00442656	0.003	0	0.000330171		Zbtb11	3.4061e-05	0.122684	0.36	0.167	1		Ift20	2.2599e-26	0.284663	0.361	0.324	7.01768e-22		Cst3	5.00031e-11	0.144905	0.478	0.33	1.55275e-06		Pi4ka	2.01646e-05	0.183058	0.22	0.124	0.626172
Gnl3l	8.60072e-44	0.110271	0.229	0.113	2.67078e-39		9030612E09Rik	1.06325e-08	0.00440642	0.003	0	0.000330171		Daam1	3.42882e-05	0.060648	0.09	0.023	1		Ptk2b	2.39137e-26	0.283562	0.331	0.288	7.42591e-22		Mrps26	5.12551e-11	0.137019	0.462	0.31	1.59163e-06		Epc1	2.09872e-05	0.16811	0.266	0.159	0.651714
Isg20l2	2.1478e-43	0.0980416	0.217	0.106	6.66956e-39		Chst3	1.06325e-08	0.0044007	0.003	0	0.000330171		Tra2b	3.47804e-05	0.232952	0.933	0.635	1		1300002E11Rik	2.6037e-26	0.210526	0.131	0.072	8.08528e-22		Dgcr6	5.13037e-11	0.0654657	0.114	0.05	1.59313e-06		Pmm1	2.12945e-05	0.0688836	0.087	0.033	0.661259
Pcnp	2.21173e-43	0.126361	0.498	0.305	6.86809e-39		Ppp1r14a	1.06325e-08	0.00437853	0.003	0	0.000330171		Trmt1	3.51636e-05	0.158618	0.36	0.172	1		Atrx	2.62538e-26	0.250645	0.572	0.586	8.15259e-22		D10Jhu81e	5.14581e-11	0.0783428	0.233	0.13	1.59793e-06		Mettl5	2.15077e-05	0.142474	0.17	0.086	0.667879
Zfp703	2.30781e-43	0.102134	0.113	0.039	7.16645e-39		Gm48584	1.06325e-08	0.00428229	0.003	0	0.000330171		Krr1	3.51879e-05	0.210303	0.506	0.281	1		Vps72	2.72813e-26	0.200996	0.131	0.072	8.47166e-22		Pfdn1	5.16682e-11	0.126179	0.392	0.253	1.60445e-06		Wdyhv1	2.15728e-05	0.123562	0.151	0.073	0.6699
Picalm	2.45436e-43	0.145515	0.505	0.311	7.62152e-39		Ecscr	1.06325e-08	0.00422149	0.003	0	0.000330171		Rab7	3.55701e-05	0.167646	0.719	0.419	1		Slc25a16	3.60125e-26	0.111019	0.051	0.014	1.1183e-21		Cyb561d2	5.72699e-11	0.0610477	0.186	0.097	1.7784e-06		Fgf13	2.15942e-05	0.0811183	0.087	0.033	0.670564
Arih1	2.95398e-43	0.118255	0.386	0.223	9.17301e-39		Gm13425	1.06325e-08	0.00414054	0.003	0	0.000330171		9130401M01Rik	3.56765e-05	0.159848	0.382	0.187	1		Scly	3.99324e-26	0.162174	0.089	0.039	1.24002e-21		1810011H11Rik	5.8618e-11	0.155432	0.281	0.169	1.82027e-06		Slain1	2.16468e-05	0.120513	0.179	0.09	0.672197
Mrps12	3.45874e-43	0.118155	0.425	0.249	1.07404e-38		Begain	1.06325e-08	0.00376024	0.003	0	0.000330171		Pla2g12a	3.61839e-05	0.121854	0.236	0.096	1		Narf	4.20876e-26	0.134442	0.066	0.022	1.30695e-21		Arhgap29	5.88586e-11	0.00933313	0.005	0	1.82774e-06		Plgrkt	2.17773e-05	0.16756	0.555	0.39	0.676251
Tarbp1	3.7883e-43	0.0827258	0.075	0.019	1.17638e-38		Stc1	1.06325e-08	0.00369466	0.003	0	0.000330171		Ywhaq	3.66683e-05	0.216103	0.865	0.551	1		Ndufa10	4.37427e-26	0.287446	0.383	0.362	1.35834e-21		Rab15	5.88586e-11	0.00801643	0.005	0	1.82774e-06		Slc50a1	2.18546e-05	0.151423	0.45	0.298	0.678652
Seh1l	3.79521e-43	0.104176	0.281	0.149	1.17853e-38		Btnl2	1.06325e-08	0.00361469	0.003	0	0.000330171		Plpp2	3.68088e-05	0.0588974	0.056	0.01	1		Hip1	5.26347e-26	0.109054	0.044	0.01	1.63447e-21		C77080	5.88586e-11	0.00637712	0.005	0	1.82774e-06		Ptprcap	2.1963e-05	0.129321	0.94	0.844	0.682017
Setd6	5.25684e-43	0.0921609	0.133	0.052	1.63241e-38		Spem1	1.06325e-08	0.00358335	0.003	0	0.000330171		Chd1	3.70037e-05	0.16686	0.719	0.409	1		C2cd5	5.40429e-26	0.182244	0.115	0.058	1.67819e-21		Madd	5.91572e-11	0.0746177	0.233	0.13	1.83701e-06		Atp8a1	2.19897e-05	0.184855	0.252	0.148	0.682845
Eif2b5	5.38567e-43	0.115185	0.237	0.12	1.67241e-38		Fgd2	1.06325e-08	0.00354624	0.003	0	0.000330171		Lpp	3.73704e-05	0.101195	0.247	0.101	1		Rhoh	5.69439e-26	0.227585	0.477	0.464	1.76828e-21		Ahnak	5.94738e-11	0.153378	0.409	0.27	1.84684e-06		Washc5	2.20117e-05	0.105308	0.083	0.031	0.683528
Ibtk	5.78422e-43	0.108566	0.198	0.094	1.79617e-38		Gm34794	1.06325e-08	0.00333745	0.003	0	0.000330171		Pigf	3.77933e-05	0.101285	0.281	0.12	1		Atox1	5.76476e-26	0.280677	0.333	0.29	1.79013e-21		Sdhb	6.06447e-11	0.129821	0.479	0.325	1.8832e-06		Insig2	2.20771e-05	0.118572	0.161	0.079	0.68556
Polr2e	5.84522e-43	0.157642	0.55	0.353	1.81512e-38		Gm10425	1.06325e-08	0.00321465	0.003	0	0.000330171		Serp1	3.80369e-05	0.17433	0.742	0.422	1		Zbtb7a	5.88175e-26	0.309874	0.293	0.243	1.82646e-21		E030030I06Rik	6.3084e-11	0.0860099	0.095	0.04	1.95895e-06		Plekha2	2.21001e-05	0.163317	0.197	0.106	0.686276
Prmt7	6.43834e-43	0.114512	0.177	0.08	1.9993e-38		Dbndd1	1.06325e-08	0.00302773	0.003	0	0.000330171		Gemin5	3.85573e-05	0.154535	0.315	0.145	1		Agtrap	6.79599e-26	0.143633	0.07	0.026	2.11036e-21		Akip1	6.44212e-11	0.0576716	0.086	0.034	2.00047e-06		Gltp	2.22045e-05	0.120648	0.33	0.199	0.689517
Faap100	7.50105e-43	0.103151	0.124	0.047	2.3293e-38		Lamc2	1.06325e-08	0.00299615	0.003	0	0.000330171		Mcmbp	3.90203e-05	0.157809	0.404	0.198	1		Tcrg-C1	6.85609e-26	0.248166	0.166	0.1	2.12902e-21		Parp11	6.54127e-11	0.0535786	0.157	0.078	2.03126e-06		Creb1	2.22656e-05	0.157956	0.33	0.206	0.691413
Gm16286	9.70038e-43	0.164792	0.618	0.414	3.01226e-38		Gm11127	1.06325e-08	0.002906	0.003	0	0.000330171		Bbip1	3.95463e-05	0.151809	0.449	0.225	1		Amn1	6.99145e-26	0.228868	0.137	0.078	2.17105e-21		Sdccag8	6.5967e-11	0.0682611	0.086	0.034	2.04847e-06		B4gat1	2.23587e-05	0.0696608	0.083	0.031	0.694305
Ncln	9.74216e-43	0.0984577	0.151	0.063	3.02523e-38		B4galt2	1.06325e-08	0.00266581	0.003	0	0.000330171		Glrx5	3.956e-05	0.259816	0.719	0.484	1		Ppp1r21	9.26755e-26	0.122275	0.059	0.019	2.87785e-21		Dnpep	6.66839e-11	0.0711142	0.163	0.082	2.07074e-06		Tsc2	2.25137e-05	0.102779	0.083	0.031	0.699117
[truncated: 8,394 more rows]
