# Supplementary material for: Longitudinal analysis of invariant natural killer T cell activation reveals a cMAF-associated transcriptional state of NKT10 cells
Source: eLife. 2022 Dec 2;11:e76586. doi: 10.7554/eLife.76586 (PMC9831610; doi:10.7554/eLife.76586)
Supplement: Supplementary file 4. [file elife-76586-supp4.xlsx]

## Sheet: Sheet1
Adipose	Spleen
0610010F05Rik	Abca1
1190002N15Rik	Aqr
1810006J02Rik	Arhgef3
1810037I17Rik	AW011738
2010111I01Rik	Btaf1
2210011C24Rik	Ccr7
2310022A10Rik	Ccr9
2510039O18Rik	Cd160
2610001J05Rik	Cd9
4921524J17Rik	Cflar
4930503L19Rik	Ctss
4932438A13Rik	Dpp4
5031425F14Rik	Dtx1
5033430I15Rik	Eef1b2
9930022D16Rik	Fam124b
A930024E05Rik	Gngt2
AA467197	Hmgn1
Abca2	Igkc
Abhd17a	Iigp1
Abhd2	Il17rb
Abhd6	Il6ra
Acaa2	Il7r
Acadl	Kcnq1ot1
Acadm	Luc7l3
Acadvl	Lysmd2
Acd	mt-Atp6
Acly	mt-Co2
Acot7	mt-Co3
Acot9	Naca
Acoxl	Ntrk3
Actn4	Pepd
Actr1a	Pnn
Actr3	Pogk
Adamts14	Pou2f2
Adgrl1	Pptc7
Adipor1	Prrc2c
Adora2a	Psme1
Adssl1	Rgs10
Aff4	Rhog
Agpat2	Rora
Agtpbp1	Rpl10
Aifm2	Rpl10a
Akt1	Rpl13
Aldoc	Rpl18
Alg1	Rpl19
Alkbh5	Rpl21
Ank	Rpl22
Antxr2	Rpl23
Anxa1	Rpl24
Anxa11	Rpl26
Anxa2	Rpl7
Anxa4	Rpl7a
Aoah	Rps12
Ap2a2	Rps12-ps3
Ap2m1	Rps18
Ap4s1	Rps19
Apaf1	Rps20
Aplp1	Rps9
Aplp2	Slamf6
Apmap	Sms
Arap3	Themis
Arf1	Tnfrsf25
Arf5	Txndc5
Arfgap2	Zfp553
Arg1	Zfp946
Arhgap21
Arhgap31
Arhgdia
Arid5a
Arl13b
Arl15
Arl3
Arl8a
Arpc1b
Arpc2
Arpc3
Arpc4
Arpp19
Asah1
Atg5
Atl3
Atn1
Atp2b1
Atp2b4
Atp6ap1
Atp6ap2
Atp6v1a
Atp6v1b2
Atp6v1e1
Atp6v1g1
Atp6v1h
Atxn1
Auh
Aup1
Avl9
Azi2
B3glct
B4galt5
Bach1
Bag1
Baiap2
Bambi
Bbs9
BC004004
BC035044
Bcl2
Bcl2l11
Bcl7c
Bhlhe40
Bid
Birc2
Blvra
Bmp7
Bnip2
Bspry
Btbd10
Btbd17
Btg2
C1qtnf12
C1qtnf6
C2cd2l
Cacul1
Calca
Calm1
Calm2
Camk1
Camk2b
Camk2g
Camk2n1
Capg
Capza2
Capzb
Card19
Casp3
Casp4
Cass4
Cbx4
Cbx5
Ccdc124
Ccdc136
Ccdc50
Ccdc71l
Ccdc88b
Ccl5
Ccno
Ccr2
Ccr4
Ccr5
Ccr8
Ccrl2
Ccser2
Cd2
Cd200r1
Cd28
Cd38
Cdc45
Cdca7l
Cdk1
Cdk5rap1
Cdk6
Cdkn1a
Cdkn2c
Cds2
Cebpb
Celsr1
Cenpb
Cep170
Cers4
Cers5
Cggbp1
Chchd3
Chmp4b
Chmp6
Chrne
Chst2
Chsy1
Chtf8
Cirbp
Clcc1
Clcn4
Clk1
Clnk
Cmtm7
Cnpy3
Cobll1
Cog5
Col4a3bp
Coq10b
Coro1c
Coro2a
Cotl1
Cpt1a
Cr1l
Crat
Crim1
Cript
Crlf2
Crybg1
Csgalnact2
Csnk2b
Csrnp1
Cst7
Ctbp1
Ctla4
Ctnna1
Ctsd
Ctsw
Cxcr4
Cyfip1
Cyfip2
Cyp20a1
Cyp4f16
Cyth2
Cytip
D16Ertd472e
D630039A03Rik
Dab2ip
Dctn3
Dctn4
Dennd4a
Dgat1
Dgkd
Dhcr24
Dhrs11
Dhrs9
Dhx32
Dhx40
Diaph1
Dnajb1
Dnajb14
Dnajc1
Dnajc15
Dok2
Donson
Dph3
Dpm1
Dpp9
Dpysl2
Dst
Dstn
Dtl
Dtnbp1
Dusp1
Dusp10
Dusp5
Dusp6
Dusp7
Dxo
Dync1h1
Dync1li1
Dyrk3
E130309D02Rik
E2f1
Eci1
Edaradd
Edem1
Eef2
Efhd2
Egln1
Egln2
Ehd4
Eif4e3
Eif4ebp1
Elf1
Elmo2
Emc10
Emc3
Emd
Emid1
Emp1
Enkd1
Eno1
Eno3
Enpp1
Ensa
Entpd1
Epas1
Eps8
Erp44
Errfi1
Esyt1
Etfb
Ets1
Evi2a
Exoc4
Exoc6
Ezr
Fabp4
Faf1
Fam102a
Fam13b
Fam19a3
Fam204a
Fam49b
Fam50a
Fam83d
Fam84a
Fasl
Fbxl14
Fbxo4
Fbxw8
Fcer1g
Fcho2
Fcrl6
Fcrls
Fdps
Fdxacb1
Fem1c
Fen1
Fgd5
Fgl2
Fgr
Fhl2
Filip1
Flot1
Flot2
Fndc3b
Fos
Fosb
Frat2
Fth1
Fxyd5
Gabarapl1
Gadd45a
Galc
Gas7
Gatad1
Gatad2a
Gba
Gem
Gemin7
Gga1
Ggh
Ggta1
Ghdc
Ginm1
Gipc2
Gla
Glipr1
Gls
Glud1
Gm11110
Gm12195
Gm14718
Gm16907
Gm17056
Gm19557
Gm26532
Gm26699
Gm26778
Gm28875
Gm33104
Gm38405
Gm42418
Gm45902
Gm5127
Gna13
Gnas
Gnb1
Gnb4
Gng2
Gnptg
Golph3
Gpd2
Gpr132
Gpr160
Gpr171
Gpr174
Grina
Grn
Gtdc1
Gtf2b
Gtf2h5
Gxylt1
Gyg
Gzmb
Gzmc
H1f0
H2-D1
H2-K1
H2-Q7
H2-T23
H2afy
H3f3b
Hace1
Hdac3
Herc2
Hexim1
Hhex
Hilpda
Hip1
Hk1
Hmbs
Hmces
Hnrnpf
Hopx
Hprt
Hps1
Ier2
Ier3ip1
Ier5l
Iffo2
Ifi27
Ifitm10
Ifnar1
Ifngr1
Ifrd1
Igsf5
Igsf8
Il10rb
Il12rb2
Il21r
Il2rb
Il3ra
Il4ra
Ilk
Inf2
Ing2
Inpp5d
Inppl1
Ipo11
Iqgap1
Iqsec1
Irak1
Irak2
Irs2
Isca1
Itgad
Itgb1bp1
Itgb2
Itih5
Itk
Itm2a
Itpk1
Itpkb
Itsn1
Jazf1
Jdp2
Jmjd1c
Jpt1
Junb
Jund
Kansl1
Katnb1
Kbtbd11
Kcnj8
Kcnk5
Kctd12
Kif19a
Klf13
Klf4
Klf6
Klf7
Klhdc2
Klra1
Klra3
Klra5
Klra6
Klra7
Klra9
Klrb1a
Klrb1b
Klre1
Klrg1
Klrk1
Kmt2c
Krtcap2
Lactb
Lactb2
Lamb3
Lamc1
Lasp1
Lat2
Lcp2
Leprotl1
Lfng
Lgals1
Lgals3
Lin54
Litaf
Lmna
Lncpint
Lnpk
Lpp
Lrch1
Lrmp
Lrp10
Lrrc8c
Lrrc8d
Lrrfip1
Lrrfip2
Lrrk1
Lrrn4
Lsm8
Lta4h
Ltb4r1
Luc7l2
Ly6c2
Lyn
Lyst
Lztr1
Maf
Malt1
Map1lc3a
Map2k5
Map4
Map7d1
Mapk14
March7
Mark4
Marveld2
Mbd2
Mcl1
Mcm2
Mcm3
Mcm5
Mcm6
Mcu
Mcub
Med25
Mef2a
Mef2d
Metrnl
Mfsd6
Mgat4b
Mgst3
Midn
Mkrn1
Mkrn2
Mlf1
Mmp9
Mms22l
Mob4
Mpc1
Mpdu1
Mpnd
Mprip
Mri1
Msi2
mt-Nd1
Mt1
Mtmr12
Muc1
Mvb12b
Mxd1
Mxi1
Myadm
Myl12a
Myl6
Myo1c
Myo6
Myo9b
N4bp3
Nabp1
Nans
Napsa
Nck2
Ncoa2
Ncoa3
Ncor2
Ncr1
Ndufb7
Neat1
Nedd9
Nek6
Nelfcd
Neurl3
Nfil3
Ninj1
Nkg7
Nln
Nlrc5
Npc2
Nptn
Nr3c1
Nras
Nrf1
Nsmaf
Nsmf
Nt5c
Nt5m
Nubp1
Nucb1
Nudt3
Nudt4
Ocel1
Ogfod2
Olfm1
Os9
Osbpl3
Otub1
Otud7b
Otulin
P2rx4
P2ry10
Pacs2
Pak2
Pam
Pank2
Paqr4
Paxbp1
Pbx3
Pcbp4
Pcyox1
Pdcl3
Pde4b
Pdgfb
Pdlim5
Peak1
Pear1
Per1
Pex7
Pfkp
Pfn1
Pgls
Pgrmc1
Phf6
Phgdh
Pi4k2b
Pik3r1
Pim2
Pip5k1b
Pitpna
Pja1
Pkig
Pkmyt1
Pld3
Plek
Plekhf2
Plekho2
Plin2
Plk4
Plp2
Plpbp
Plpp6
Plxdc2
Plxna1
Pmaip1
Pmvk
Pnrc1
Polg2
Pop4
Por
Ppib
Ppm1h
Ppm1j
Ppme1
Ppp1cc
Ppp1r12c
Ppp1r14c
Ppp1r15a
Ppp1r2
Ppp1r9b
Ppp2r2d
Ppp2r5e
Ppp3cc
Praf2
Prdm1
Prdx6
Prelid1
Prkar1a
Prkar2b
Prkca
Prkx
Prr5l
Psen2
Psmd13
Psph
Ptgs1
Ptms
Ptpa
Ptpn1
Ptpn13
Ptpn22
Ptpn4
Ptpn9
Ptprc
Ptrhd1
Puf60
Pvr
Pwwp2b
Pxmp2
Pxn
Rab10os
Rab11a
Rab18
Rab1a
Rab1b
Rab22a
Rab28
Rab2a
Rab43
Rab4a
Rab5a
Rab5c
Rab6a
Rab6b
Rab7
Rabac1
Rabgap1l
Rac1
Rad54l2
Rap1a
Rap1b
Rap2a
Raph1
Rara
Rasal3
Rasd1
Rasgef1a
Rasgrf1
Rbm3
Rbm39
Rbm47
Rbms1
Rbms2
Rbpms
Rer1
Rfk
Rgs1
Rgs2
Rhoa
Rhob
Rhobtb2
Rhoc
Rnase4
Rnaseh2c
Rnaset2a
Rnf125
Rnf128
Rnf130
Rnf19b
Rngtt
Rps6ka4
Rps6kb2
Rras2
Rtf2
Rtn4
Runx2
Runx2os1
Rwdd1
Ryk
S100a1
S100a11
S100a4
S100a6
Sae1
Samd1
Samm50
Samsn1
Sat1
Scamp2
Scarb2
Sccpdh
Sclt1
Sdcbp
Sdhb
Selenof
Selenon
Sema4a
Sema4c
Sema4d
Senp2
Sept11
Sept9
Sergef
Serinc1
Serinc3
Serpinb1a
Serpinb6a
Sertad1
Sertad2
Sf3b5
Sgta
Sh2d2a
Sh3glb1
Sh3glb2
Shoc2
Sidt2
Sik1
Sirt2
Skiv2l
Sla
Slc16a10
Slc16a3
Slc16a6
Slc20a1
Slc22a15
Slc25a12
Slc25a36
Slc35b1
Slc35e4
Slc37a3
Slc38a2
Slc3a2
Slc41a3
Slc48a1
Slc52a3
Smad7
Smarcd1
Smc2
Smox
Snx18
Snx3
Socs2
Socs3
Spg21
Spin1
Spry2
Sptlc2
Spty2d1
Sqle
Srgap3
Srsf5
Ssbp4
Ssh2
St3gal4
Stard3nl
Stard4
Stat4
Stau2
Stk16
Stk17b
Stk25
Stk32c
Stk39
Stk40
Stx12
Stx7
Stx8
Styk1
Suco
Sugt1
Sulf2
Susd3
Synj2
Taf1
Tagln2
Tasp1
Tbc1d10a
Tbc1d2b
Tbc1d9b
Tbcb
Tbkbp1
Tbx21
Tceal9
Tcf25
Tcrg-C2
Tdrd3
Tfeb
Tgfa
Tiam1
Timm10b
Tinf2
Tiparp
Tipin
Tjp2
Tln1
Tm2d2
Tm6sf1
Tm7sf3
Tmc6
Tmem107
Tmem120b
Tmem123
Tmem159
Tmem163
Tmem176a
Tmem176b
Tmem41b
Tmem62
Tmem64
Tmtc4
Tmx4
Tnfaip3
Tnfrsf1b
Tnfsf10
Tnfsf12
Tnrc18
Tob2
Tomm40l
Topbp1
Tox
Tpi1
Tpm3
Tpm4
Tpp1
Traip
Trappc5
Trgv2
Trim16
Trim36
Trim46
Trip13
Trir
Trp53i11
Trp53inp2
Tsc22d3
Tspan17
Tspan4
Ttc7b
Ttyh3
Tubb2a
Tubgcp2
Txndc17
Txnrd2
Tyrobp
Ubash3a
Ubb
Ubc
Ube2d2a
Ube2d3
Ube2e3
Ube2i
Ube2j1
Ube2m
Ubl3
Ubqln2
Ubxn11
Ucp2
Ugcg
Ugp2
Unc119
Unc45a
Uqcr11
Usp14
Vamp3
Vasp
Vav1
Vav3
Vcl
Vcpkmt
Vgll4
Vhl
Vopp1
Vps26b
Vps29
Vps33a
Vps37b
Vti1b
Wac
Wbp11
Wdfy1
Wdr41
Wdr90
Wdr95
Wnk1
Wrnip1
Wwc1
Wwc2
Xpnpep1
Xpr1
Yaf2
Ykt6
Ywhab
Ywhah
Ywhaq
Zbtb38
Zcchc2
Zdhhc20
Zdhhc8
Zfand3
Zfp318
Zfp36
Zfp367
Zfp36l2
Zfp560
Zfp64
Zfp868
Zfpm1
Zyx
