# Supplementary material for: Longitudinal analysis of invariant natural killer T cell activation reveals a cMAF-associated transcriptional state of NKT10 cells
Source: eLife. 2022 Dec 2;11:e76586. doi: 10.7554/eLife.76586 (PMC9831610; doi:10.7554/eLife.76586)
Supplement: Supplementary file 5. [file elife-76586-supp5.xlsx]

## Sheet: Sheet1
Adipose NKT10 cell genes	P_Value	Log2(Fold Change)	pct.1	pct.2	Adjusted_P_Value
Il10	0	2.11957	1	0	0
Gzmb	1.33966e-54	1.2209	0.732	0.501	2.29376e-50
Lag3	7.40353e-178	0.983017	0.791	0.337	1.26763e-173
Il4	1.94764e-118	0.928803	0.66	0.284	3.33475e-114
Rgs16	6.47643e-111	0.854328	0.663	0.295	1.1089e-106
Eea1	1.3912e-95	0.772067	0.822	0.503	2.38201e-91
Gm45716	9.87686e-91	0.757457	0.88	0.584	1.69112e-86
Ccl3	1.23196e-70	0.746724	0.345	0.121	2.10937e-66
Tnfrsf4	7.50403e-78	0.659404	0.573	0.266	1.28484e-73
Ctla4	1.20851e-62	0.617944	0.866	0.586	2.0692e-58
Hivep3	1.98724e-92	0.617622	0.696	0.35	3.40256e-88
Dctpp1	4.6265e-89	0.610146	0.887	0.584	7.9215e-85
Ly6a	1.07405e-74	0.596604	0.996	0.834	1.83898e-70
Tnfrsf9	2.65737e-53	0.591857	0.507	0.26	4.54995e-49
Ptms	1.61046e-74	0.547498	0.876	0.567	2.75743e-70
Angptl2	1.4125e-132	0.543975	0.373	0.089	2.41849e-128
Hist1h1b	3.05877e-34	0.512695	0.623	0.389	5.23723e-30
Rilpl2	7.65036e-59	0.509981	0.89	0.638	1.3099e-54
Odc1	9.86555e-60	0.496978	0.936	0.721	1.68918e-55
Glrx	3.70861e-42	0.496187	0.886	0.666	6.34988e-38
Ccl1	1.34409e-14	0.484032	0.128	0.058	2.30134e-10
Mcm3	5.09016e-57	0.479413	0.807	0.502	8.71538e-53
Izumo1r	5.71616e-65	0.477281	0.773	0.457	9.78721e-61
Il21	7.64767e-85	0.477171	0.385	0.13	1.30943e-80
Ldha	8.21378e-102	0.475342	1	0.968	1.40636e-97
Pkm	8.12491e-90	0.470735	0.996	0.922	1.39115e-85
Dut	1.05708e-48	0.467543	0.911	0.682	1.80994e-44
Plekho1	6.06677e-131	0.463534	0.661	0.261	1.03875e-126
Mcm6	7.69511e-57	0.458269	0.893	0.611	1.31756e-52
Ube2s	1.14132e-42	0.455006	0.97	0.846	1.95417e-38
Naa10	1.87962e-69	0.454983	0.892	0.639	3.21829e-65
Gapdh	1.20176e-89	0.449484	1	0.978	2.05765e-85
Maf	6.67512e-43	0.446206	0.951	0.782	1.14291e-38
Csf1	1.62133e-78	0.44572	0.333	0.107	2.77603e-74
Top2a	9.92427e-37	0.422251	0.666	0.416	1.69923e-32
F2rl2	2.27904e-77	0.422182	0.606	0.286	3.90217e-73
Hist1h1e	4.67933e-30	0.420176	0.742	0.522	8.01195e-26
Mki67	1.17343e-32	0.417778	0.671	0.435	2.00915e-28
Tbc1d4	1.28086e-45	0.417764	0.462	0.238	2.19309e-41
Irf8	3.56698e-41	0.416803	0.839	0.597	6.10739e-37
Tuba1b	2.55337e-34	0.413253	0.861	0.662	4.37188e-30
Nkg7	1.42365e-38	0.407304	0.998	0.984	2.43757e-34
Ube2c	6.99302e-18	0.407141	0.555	0.393	1.19734e-13
Zbtb16	7.96305e-56	0.402979	0.844	0.559	1.36343e-51
Lat	7.51067e-59	0.400093	0.995	0.887	1.28598e-54
Ctsb	4.53373e-56	0.398635	0.962	0.769	7.76266e-52
Aldoa	2.32407e-57	0.387091	0.992	0.894	3.97928e-53
Cdk1	1.19771e-40	0.3845	0.597	0.343	2.05072e-36
Smc2	5.67052e-37	0.383158	0.747	0.484	9.70906e-33
Mcm5	3.94461e-54	0.382485	0.77	0.46	6.75396e-50
Aprt	1.48574e-44	0.38097	0.977	0.823	2.54389e-40
Sub1	3.33768e-61	0.376417	1	0.994	5.71477e-57
Stmn1	2.66581e-37	0.375613	0.804	0.522	4.56441e-33
Timp2	2.73403e-63	0.375073	0.705	0.392	4.68121e-59
Ssr2	2.99467e-52	0.370675	0.965	0.753	5.12747e-48
Ybx3	1.80826e-40	0.369782	0.927	0.753	3.09609e-36
Ube2m	4.34207e-54	0.369322	0.96	0.778	7.43449e-50
Cdkn2c	4.71499e-45	0.364904	0.643	0.385	8.07301e-41
Vsir	8.73642e-47	0.360971	0.858	0.613	1.49585e-42
Hif1a	8.90514e-42	0.360523	0.945	0.721	1.52474e-37
Srsf7	5.90562e-39	0.359473	0.938	0.758	1.01116e-34
Nap1l1	4.24987e-42	0.359157	0.963	0.785	7.27662e-38
Cks1b	1.00256e-39	0.357542	0.745	0.468	1.71658e-35
Mif	3.90906e-35	0.356876	0.966	0.876	6.69309e-31
Pclaf	3.86071e-32	0.355888	0.672	0.418	6.61031e-28
Plac8	7.02448e-28	0.355169	0.874	0.649	1.20273e-23
Pou2f2	1.28184e-39	0.35287	0.504	0.288	2.19477e-35
Rrm1	1.35418e-41	0.351438	0.713	0.445	2.31863e-37
Ssr4	9.46307e-45	0.351376	0.988	0.889	1.62027e-40
Zap70	3.65722e-44	0.351035	0.975	0.844	6.26189e-40
Snx2	4.06947e-38	0.35082	0.917	0.665	6.96774e-34
Ran	3.41061e-42	0.350171	0.993	0.951	5.83965e-38
Tpi1	2.86266e-40	0.349609	0.941	0.722	4.90145e-36
Lbh	3.70355e-33	0.348417	0.843	0.641	6.34122e-29
Hist1h2ap	6.20289e-25	0.346165	0.475	0.286	1.06206e-20
Tnfrsf18	1.35473e-33	0.344707	0.965	0.821	2.31957e-29
Pomp	1.21029e-59	0.34376	0.995	0.917	2.07226e-55
Tubb5	2.78588e-20	0.342176	0.927	0.833	4.76998e-16
Agpat4	3.72713e-112	0.341459	0.537	0.193	6.38158e-108
Baz1a	6.28722e-36	0.336304	0.936	0.745	1.0765e-31
Cdca8	2.90993e-26	0.335228	0.564	0.364	4.98239e-22
Ubash3b	1.19911e-57	0.333673	0.712	0.409	2.05311e-53
Ccr5	2.99609e-35	0.332772	0.857	0.625	5.1299e-31
Psme2	7.56589e-53	0.33267	0.998	0.92	1.29543e-48
Hspd1	2.8535e-24	0.331572	0.945	0.823	4.88576e-20
Psmb5	2.25898e-52	0.331108	0.996	0.883	3.86782e-48
Tipin	6.16319e-42	0.330495	0.771	0.497	1.05526e-37
Ehd1	3.96399e-56	0.329412	0.609	0.332	6.78714e-52
Il13	2.72737e-43	0.329358	0.218	0.075	4.66981e-39
Cenpe	5.28504e-26	0.328457	0.477	0.292	9.04905e-22
Zeb2	2.23815e-56	0.327117	0.45	0.204	3.83215e-52
Cenpa	9.17589e-24	0.327088	0.693	0.488	1.5711e-19
Ucp2	3.81375e-41	0.326925	0.994	0.946	6.5299e-37
Pin1	8.34086e-43	0.324333	0.867	0.642	1.42812e-38
Ppa1	1.50276e-37	0.32217	0.867	0.623	2.57302e-33
Ranbp1	9.05613e-35	0.321687	0.965	0.861	1.55059e-30
Ifi27l2a	2.16487e-31	0.321419	0.977	0.77	3.70669e-27
Uqcr10	6.66652e-42	0.32014	0.965	0.796	1.14144e-37
Ifng	5.02164e-12	0.319686	0.927	0.836	8.59806e-08
Slfn2	3.9482e-31	0.318371	0.986	0.877	6.76011e-27
Anp32b	3.18436e-37	0.317213	0.996	0.929	5.45226e-33
Casp3	2.16976e-53	0.315749	0.67	0.396	3.71506e-49
Plek	1.46176e-58	0.314379	0.574	0.291	2.50283e-54
Lig1	8.37035e-41	0.312756	0.635	0.372	1.43317e-36
Phf5a	2.56854e-40	0.310848	0.957	0.746	4.39786e-36
Mcm4	8.34356e-40	0.310681	0.73	0.459	1.42858e-35
Sssca1	1.90605e-38	0.310607	0.786	0.527	3.26354e-34
Psmc5	1.01896e-39	0.308035	0.968	0.768	1.74467e-35
Nme1	2.96368e-40	0.307231	0.993	0.933	5.0744e-36
Gmnn	1.69395e-40	0.307168	0.753	0.473	2.90038e-36
Birc5	3.85386e-22	0.306645	0.582	0.388	6.59858e-18
Ddx39	6.16783e-36	0.306454	0.932	0.725	1.05606e-31
Atp5g1	1.35085e-39	0.305761	0.984	0.894	2.31293e-35
Phgdh	7.95531e-32	0.305373	0.87	0.677	1.36211e-27
Abracl	1.57162e-48	0.304458	0.998	0.94	2.69092e-44
Pdcd1	3.91731e-59	0.304078	0.603	0.313	6.70722e-55
Spc24	4.16224e-34	0.303648	0.615	0.375	7.12659e-30
Cdc20	7.6817e-37	0.303473	0.499	0.273	1.31526e-32
Cmtm7	4.22956e-20	0.302013	0.921	0.775	7.24186e-16
Fkbp2	4.65659e-39	0.301668	0.876	0.616	7.97301e-35
Tgfb1	2.66148e-37	0.300975	0.968	0.792	4.55698e-33
Hnrnpab	1.56475e-28	0.299188	0.958	0.836	2.67916e-24
Gadd45b	7.7648e-37	0.296843	0.896	0.672	1.32949e-32
Hmgn2	5.02722e-24	0.29641	0.873	0.677	8.60761e-20
Ncl	6.23273e-25	0.296101	0.996	0.978	1.06717e-20
Mcm2	2.20308e-37	0.295354	0.72	0.462	3.77212e-33
Srgn	3.24186e-35	0.294625	1	0.999	5.55072e-31
Incenp	3.6677e-36	0.294234	0.657	0.406	6.27984e-32
Nhp2	1.34327e-27	0.292556	0.932	0.757	2.29994e-23
Snrpd1	9.31412e-34	0.291486	0.963	0.844	1.59476e-29
Ppil1	2.04473e-40	0.2914	0.855	0.595	3.50098e-36
Ndfip1	1.15273e-34	0.290943	0.964	0.832	1.9737e-30
Psmb2	7.46926e-42	0.290081	0.989	0.861	1.27889e-37
Rfc4	8.68238e-42	0.289329	0.682	0.408	1.4866e-37
Tk1	2.46844e-41	0.287945	0.616	0.355	4.22646e-37
Rrm2	9.99929e-31	0.287632	0.588	0.355	1.71208e-26
Hmgb2	4.4544e-18	0.286578	0.987	0.931	7.62683e-14
Smc4	1.01339e-25	0.286324	0.854	0.636	1.73513e-21
Mcm7	2.30107e-34	0.286215	0.712	0.455	3.93989e-30
Pa2g4	2.14333e-27	0.286168	0.908	0.723	3.6698e-23
Eif5a	3.32403e-34	0.284473	0.999	0.977	5.6914e-30
Tyms	2.4977e-29	0.284212	0.672	0.441	4.27657e-25
Ccl4	8.77134e-45	0.2842	0.575	0.339	1.50183e-40
Ndufb8	6.7362e-38	0.283574	0.977	0.832	1.15337e-33
Tmem163	2.57187e-62	0.282848	0.496	0.229	4.40355e-58
Ddx21	1.40488e-26	0.281493	0.957	0.809	2.40544e-22
Dtymk	1.59148e-35	0.280749	0.845	0.602	2.72493e-31
Nasp	2.0721e-28	0.279737	0.866	0.657	3.54785e-24
Psmd1	1.50495e-43	0.278646	0.815	0.548	2.57677e-39
Tpx2	3.56427e-30	0.277708	0.496	0.288	6.10275e-26
Txndc17	5.7405e-32	0.277526	0.969	0.824	9.82889e-28
Spcs1	3.28922e-34	0.27682	0.963	0.778	5.6318e-30
D8Ertd738e	2.88264e-43	0.276728	0.99	0.906	4.93566e-39
Hmgb1	3.68193e-24	0.276703	0.994	0.973	6.3042e-20
Siva1	3.97898e-32	0.276622	0.735	0.491	6.81281e-28
Cd6	1.87746e-43	0.275017	0.729	0.446	3.21459e-39
Psma7	1.08034e-38	0.274871	0.999	0.932	1.84976e-34
Hnrnpd	2.6157e-34	0.274589	0.982	0.891	4.47861e-30
Dek	1.10702e-24	0.274462	0.942	0.806	1.89544e-20
H2afx	4.36518e-22	0.273418	0.702	0.498	7.47406e-18
Prelid3b	2.5567e-36	0.273376	0.834	0.579	4.37758e-32
Snx9	3.54568e-80	0.273291	0.309	0.092	6.07092e-76
Pfn1	5.1836e-76	0.273022	1	1	8.87537e-72
Selenoh	2.93817e-20	0.272987	0.851	0.68	5.03073e-16
Psmb6	1.62573e-35	0.272383	0.975	0.847	2.78357e-31
Hmgn1	8.68007e-38	0.271798	0.651	0.398	1.4862e-33
S100a11	4.91079e-15	0.271419	0.998	0.966	8.40825e-11
Erp29	2.10504e-32	0.270833	0.954	0.741	3.60425e-28
Pmvk	2.8142e-51	0.269993	0.687	0.396	4.81847e-47
Psmb7	1.59891e-33	0.269729	0.934	0.715	2.73765e-29
Ybx1	1.92191e-42	0.269335	1	0.987	3.2907e-38
Ikzf2	5.70073e-31	0.267965	0.504	0.297	9.76079e-27
Cisd1	1.17521e-34	0.26769	0.802	0.551	2.0122e-30
Sccpdh	3.22758e-77	0.266254	0.287	0.081	5.52626e-73
Prdx1	1.80028e-32	0.266136	0.978	0.886	3.08245e-28
Lgals1	2.13487e-25	0.265605	0.996	0.974	3.65533e-21
Hnrnpu	2.25494e-31	0.263882	0.987	0.934	3.8609e-27
Mdh2	1.59264e-33	0.26344	0.98	0.856	2.72691e-29
Pgk1	1.6801e-29	0.262635	0.978	0.842	2.87666e-25
Mrto4	1.27302e-29	0.262474	0.801	0.573	2.17966e-25
Arl5a	5.75385e-48	0.262406	0.694	0.402	9.85174e-44
Tomm40	4.90285e-31	0.262381	0.85	0.623	8.39465e-27
Fkbp1a	6.02634e-29	0.26143	0.974	0.808	1.03183e-24
Ass1	7.44877e-29	0.260773	0.888	0.643	1.27538e-24
Mrpl18	4.93371e-27	0.26004	0.957	0.788	8.44749e-23
Perp	2.64784e-35	0.259241	0.363	0.179	4.53363e-31
Prc1	1.31995e-26	0.259141	0.473	0.278	2.26002e-22
Ctsz	2.78293e-39	0.258844	0.798	0.531	4.76493e-35
Eif6	8.85924e-28	0.258775	0.958	0.801	1.51688e-23
Mrpl54	1.65241e-29	0.258221	0.899	0.703	2.82926e-25
Dbi	2.30231e-24	0.256937	0.946	0.755	3.94201e-20
Psma4	3.51328e-28	0.256611	0.981	0.849	6.01544e-24
Alcam	1.32616e-66	0.255364	0.418	0.168	2.27065e-62
Prkcsh	5.57797e-37	0.254843	0.82	0.553	9.5506e-33
Hells	3.86563e-42	0.254528	0.583	0.33	6.61874e-38
Smdt1	7.96771e-29	0.253846	0.986	0.869	1.36423e-24
Fen1	1.23674e-35	0.253593	0.679	0.425	2.11755e-31
Pcna	7.75025e-31	0.253543	0.795	0.54	1.327e-26
Psma3	1.41007e-36	0.25307	0.995	0.928	2.41433e-32
Anp32e	1.11902e-22	0.252019	0.906	0.716	1.91599e-18
Ndufb7	6.75591e-33	0.251553	0.994	0.908	1.15675e-28
Smarcc1	4.1959e-31	0.250903	0.812	0.572	7.18422e-27
Mrps28	3.71739e-40	0.250683	0.725	0.469	6.36492e-36
Tmem2	5.26891e-66	0.250284	0.444	0.186	9.02144e-62
Rrp1b	9.58521e-36	0.250262	0.597	0.358	1.64118e-31
Sec61b	2.08929e-27	0.250179	0.999	0.932	3.57729e-23
Kif11	7.32517e-26	0.250038	0.49	0.294	1.25422e-21
