# Supplementary material for: Longitudinal analysis of invariant natural killer T cell activation reveals a cMAF-associated transcriptional state of NKT10 cells
Source: eLife. 2022 Dec 2;11:e76586. doi: 10.7554/eLife.76586 (PMC9831610; doi:10.7554/eLife.76586)
Supplement: Supplementary file 6. [file elife-76586-supp6.xlsx]

## Sheet: Sheet1
Splenic NKT10 cell genes	P_Value	Log2(Fold Change)	pct.1	pct.2	Adjusted_P_Value
Il10	0	4.00525	1	0	0
Ctla4	3.35293e-40	2.36577	0.378	0.071	5.09109e-36
Tnfrsf4	3.76937e-27	2.33268	0.504	0.162	5.72341e-23
Il21	4.71839e-94	2.05234	0.449	0.045	7.1644e-90
Maf	3.74587e-32	1.66184	0.803	0.379	5.68773e-28
Eea1	1.19076e-21	1.25023	0.803	0.467	1.80805e-17
Tnip3	1.46389e-15	0.992881	0.425	0.166	2.22277e-11
Slfn2	6.75836e-20	0.97393	0.945	0.774	1.02619e-15
Ccr5	2.07167e-12	0.967397	0.669	0.4	3.14562e-08
Rgs16	2.21883e-37	0.937452	0.472	0.11	3.36907e-33
Sdf4	3.74466e-10	0.879554	0.866	0.685	5.68589e-06
Irf8	5.49415e-10	0.802514	0.858	0.728	8.34231e-06
Tnfrsf18	3.24459e-14	0.796235	0.874	0.635	4.92658e-10
Gm45716	2.75673e-07	0.765798	0.551	0.359	0.00418582
Casp4	7.41287e-23	0.736586	0.402	0.117	1.12557e-18
Agpat4	4.62796e-33	0.725286	0.425	0.102	7.02709e-29
Pou2f2	1.99164e-09	0.720722	0.614	0.378	3.02411e-05
Furin	1.31324e-06	0.720502	0.85	0.728	0.0199403
Gbp3	3.17121e-14	0.70714	0.465	0.196	4.81516e-10
Serpina3g	4.67642e-07	0.706873	0.709	0.515	0.00710068
Itgav	7.42134e-09	0.682919	0.449	0.239	0.000112686
Mapkapk2	1.36247e-09	0.616144	0.756	0.493	2.06878e-05
Slamf1	4.30471e-11	0.606737	0.772	0.507	6.53627e-07
Odc1	9.84534e-09	0.59046	0.937	0.758	0.000149492
Hivep3	4.85539e-08	0.55616	0.449	0.247	0.000737243
Zeb2	1.31797e-08	0.551763	0.48	0.257	0.000200121
Il21r	1.4455e-07	0.549815	0.504	0.301	0.00219484
Perp	4.22057e-11	0.54391	0.181	0.051	6.40851e-07
Ly6a	7.70601e-07	0.527255	0.906	0.779	0.0117008
Hif1a	1.82999e-09	0.519094	0.858	0.64	2.77866e-05
Gpr174	1.78171e-11	0.510757	0.504	0.242	2.70535e-07
Chst2	2.03503e-08	0.507882	0.543	0.316	0.000308999
Vsir	7.80701e-09	0.497826	0.858	0.651	0.000118542
Srgn	1.24609e-11	0.492392	0.992	0.993	1.89206e-07
Ifih1	1.87888e-06	0.486939	0.244	0.111	0.0285289
Plscr1	6.31964e-15	0.485291	0.417	0.156	9.59574e-11
2010111I01Rik	1.8755e-08	0.485121	0.748	0.462	0.000284776
Mir155hg	3.25313e-09	0.479131	0.63	0.369	4.93955e-05
Vmp1	1.14876e-12	0.478983	0.835	0.55	1.74427e-08
Ccnd2	8.91741e-08	0.477255	1	0.969	0.00135402
Ctsb	1.74508e-10	0.469616	0.654	0.364	2.64972e-06
Mir17hg	9.10462e-12	0.468133	0.543	0.264	1.38244e-07
2700038G22Rik	3.38134e-13	0.466138	0.559	0.261	5.13422e-09
Pdcd1	7.99222e-10	0.462635	0.567	0.303	1.21354e-05
Rbpj	6.03517e-08	0.453453	0.835	0.64	0.00091638
Camk2d	1.77211e-08	0.451857	0.693	0.44	0.000269078
Cd3e	4.76345e-09	0.451228	0.961	0.787	7.23282e-05
Hk2	9.50748e-11	0.449732	0.394	0.169	1.44362e-06
Ubash3b	4.16287e-09	0.439871	0.496	0.265	6.3209e-05
Tgfb1	7.51456e-08	0.438036	0.945	0.796	0.00114101
Gm26669	1.76769e-08	0.431739	0.425	0.219	0.000268406
Irf4	7.93157e-07	0.424001	0.74	0.493	0.0120433
Gm14718	5.52866e-10	0.423303	0.339	0.139	8.39472e-06
Pfn1	2.26168e-12	0.422422	1	0.991	3.43414e-08
Alcam	6.24446e-13	0.418271	0.22	0.062	9.48158e-09
Glrx	1.26043e-07	0.415622	0.346	0.164	0.00191384
Chmp4b	1.61547e-07	0.414444	0.843	0.642	0.00245293
S100a11	8.47268e-07	0.400261	0.811	0.615	0.0128649
Lag3	4.68281e-19	0.398792	0.181	0.033	7.11038e-15
M6pr	2.41754e-07	0.397589	0.882	0.678	0.00367079
Cdk6	7.91029e-08	0.396447	0.37	0.179	0.0012011
D8Ertd738e	4.86448e-08	0.38669	0.945	0.798	0.000738623
H2-Q7	1.86966e-07	0.382156	0.992	0.956	0.00283889
Ddx21	2.27863e-07	0.380027	0.969	0.858	0.00345987
Adam10	2.03977e-06	0.375053	0.535	0.32	0.0309719
Ucp2	6.93365e-08	0.371432	0.898	0.719	0.0010528
Trps1	5.84959e-11	0.361637	0.268	0.093	8.88202e-07
Twsg1	3.60268e-10	0.359875	0.189	0.059	5.47031e-06
Epcam	2.63685e-06	0.353846	0.315	0.161	0.0400379
Cst7	3.59055e-08	0.353582	0.591	0.344	0.000545189
Prdm1	9.2674e-07	0.347916	0.244	0.106	0.0140716
Msi2	7.54392e-08	0.344226	0.567	0.327	0.00114547
Ahnak	2.04871e-07	0.339818	0.583	0.322	0.00311076
Zap70	8.84185e-07	0.337065	0.921	0.772	0.0134255
Gapdh	1.16857e-06	0.332806	0.976	0.931	0.0177436
Fyn	1.42961e-06	0.327909	0.921	0.731	0.0217072
Tuba1c	3.51629e-07	0.326262	0.63	0.373	0.00533914
Nfil3	5.75238e-12	0.322436	0.22	0.065	8.73442e-08
Gm8369	2.93706e-06	0.307273	0.354	0.183	0.0445963
Tspan5	9.83808e-08	0.30524	0.402	0.205	0.00149381
Atxn1	4.82235e-10	0.302722	0.268	0.097	7.32225e-06
Rpl41	3.15313e-07	0.302544	1	0.996	0.00478772
Runx2	9.09774e-17	0.302396	0.189	0.039	1.3814e-12
Zfp703	1.28967e-06	0.299139	0.252	0.112	0.0195824
Marcksl1	2.33966e-07	0.298943	0.386	0.194	0.00355254
Gm14005	1.06097e-10	0.291894	0.268	0.093	1.61098e-06
Tnfrsf1b	7.00981e-08	0.289381	0.449	0.233	0.00106437
Gm9856	3.4233e-08	0.283226	0.441	0.216	0.000519794
Sh3rf1	9.09317e-14	0.282706	0.283	0.087	1.38071e-09
Ikbkb	1.3195e-06	0.278236	0.543	0.33	0.0200352
Rab11fip4	4.50472e-09	0.274399	0.283	0.112	6.83996e-05
Tmem2	5.75204e-09	0.27073	0.157	0.046	8.73389e-05
Casp3	2.28513e-08	0.268055	0.236	0.09	0.000346975
Ahi1	3.3568e-10	0.266481	0.283	0.105	5.09697e-06
Gfod1	1.48796e-06	0.265103	0.543	0.319	0.0225932
Nol8	2.5749e-06	0.258287	0.677	0.418	0.0390973
Hnrnpa2b1	2.86784e-06	0.243528	0.992	0.963	0.0435452
Dclre1c	6.92288e-08	0.238286	0.26	0.105	0.00105117
Fam83g	6.11537e-09	0.237397	0.189	0.061	9.28557e-05
Ptms	3.92709e-07	0.233803	0.236	0.098	0.00596289
2900097C17Rik	1.89982e-06	0.223113	0.528	0.292	0.0288469
Farp1	3.88833e-08	0.21688	0.15	0.046	0.000590404
Rpl36	1.94689e-06	0.213831	1	0.996	0.0295615
Mid1	3.30237e-08	0.2091	0.236	0.089	0.000501432
Ptger2	3.11248e-09	0.201887	0.276	0.104	4.726e-05
Sec14l1	5.73283e-07	0.192881	0.276	0.122	0.00870472
Polr3b	1.05307e-07	0.187569	0.244	0.096	0.00159898
Tut1	2.17457e-06	0.161906	0.205	0.083	0.0330187
Lnx2	1.02748e-07	0.128905	0.157	0.05	0.00156012
Slc29a3	4.92911e-07	0.12817	0.181	0.065	0.00748436
