# Supplementary material for: Longitudinal analysis of invariant natural killer T cell activation reveals a cMAF-associated transcriptional state of NKT10 cells
Source: eLife. 2022 Dec 2;11:e76586. doi: 10.7554/eLife.76586 (PMC9831610; doi:10.7554/eLife.76586)
Supplement: Supplementary file 7. [file elife-76586-supp7.xlsx]

## Sheet: Sheet1
NKTFH cells versus Unstimulated Total iNKT cells								NKTFH cells versus Non-NKTFH cells								Non-NKTFH cells versus Unstimulated Total iNKT cells
Gene	-LogFC	Average_Expression	t	P.Value	adj.P.Val	B		Gene	-LogFC	Average_Expression	t	P.Value	adj.P.Val	B		Gene	-LogFC	Average_Expression	t	P.Value	adj.P.Val	B
Id2	-2.53462	10.7756	-22.8075	1.02867e-13	1.1228e-09	21.7852		Folr4	3.271	8.53321	19.942	8.38316e-13	9.15022e-09	19.2457		Actb	0.818745	14.4046	22.1201	1.662e-13	1.81408e-09	20.5725
Folr4	2.82646	8.53321	19.2087	1.50026e-12	6.5259e-09	18.9622		Actb	-0.671427	14.4046	-17.747	5.10002e-12	2.78334e-08	16.7985		Cxcr6	-2.95681	9.12761	-19.4093	1.27685e-12	6.96839e-09	19.1241
Cxcr6	-4.51384	9.12761	-18.9886	1.79365e-12	6.5259e-09	18.5712		Crip1	-2.86354	8.47326	-16.8094	1.1743e-11	4.2725e-08	16.8245		Hmgb2	1.80664	9.54879	15.8306	2.93649e-11	9.76834e-08	16.1314
Pdcd1	4.49964	6.81851	15.4114	4.41598e-11	1.20501e-07	14.5578		Pdcd1	4.26788	6.81851	15.6612	3.45886e-11	7.746e-08	14.7593		Crip1	2.243	8.47326	15.6258	3.57979e-11	9.76834e-08	15.7792
Dennd2d	2.0385	8.13953	14.5396	1.06542e-10	2.32581e-07	14.8486		Zyx	-1.8776	8.59686	-15.6349	3.54833e-11	7.746e-08	15.8524		Lgals1	2.34943	9.21154	14.9069	7.31131e-11	1.59606e-07	15.22
Tcf7	2.65248	8.13314	13.8677	2.16824e-10	3.51605e-07	14.0644		Selplg	-2.30006	9.64732	-15.1937	5.47918e-11	9.96754e-08	15.5412		Itgb1	2.45957	10.1547	13.7406	2.4883e-10	4.52663e-07	14.0536
Il7r	-3.25854	8.30133	-13.8314	2.25491e-10	3.51605e-07	13.9954		Dennd2d	2.13185	8.13953	14.7259	8.79281e-11	1.37105e-07	14.9686		Id2	-1.01077	10.7756	-13.2912	4.08535e-10	6.30544e-07	13.3656
Id3	4.29986	6.19079	12.9837	5.78284e-10	7.88996e-07	11.3585		Lgals1	-2.32414	9.21154	-14.4565	1.1615e-10	1.58472e-07	14.8126		Ckb	-3.86797	7.07465	-13.1814	4.62149e-10	6.30544e-07	12.1906
Ckb	-3.2423	7.07465	-12.8679	6.60311e-10	8.0081e-07	12.8304		Id3	3.11735	6.19079	14.1493	1.60412e-10	1.94544e-07	13.5508		H2afz	2.36591	9.62935	12.7321	7.72458e-10	9.3682e-07	12.9372
Sh2d1a	1.97725	8.17218	12.2684	1.33357e-09	1.45559e-06	12.3973		Icos	1.88504	8.5431	13.393	3.64715e-10	3.98086e-07	13.623		Cd7	1.94389	6.25663	12.5127	9.98086e-10	1.08941e-06	12.6292
Selplg	-1.87998	9.64732	-12.1392	1.55747e-09	1.54543e-06	12.2281		Anxa6	-1.99142	9.15794	-13.0364	5.44631e-10	4.92119e-07	13.281		Ly6e	-1.11529	12.2152	-12.2282	1.39933e-09	1.38852e-06	11.9113
Mbnl1	-1.06708	9.92051	-11.9467	1.96757e-09	1.78967e-06	11.9026		S100a4	-3.18332	7.02882	-12.9047	6.32998e-10	4.92119e-07	12.3086		Actg1	0.847518	11.9309	11.9418	1.9793e-09	1.80034e-06	11.5923
Slamf6	2.03955	8.35128	11.7697	2.44577e-09	2.05351e-06	11.7957		Hmgb2	-1.40216	9.54879	-12.8776	6.5301e-10	4.92119e-07	13.0564		Il7r	-1.88832	8.30133	-11.7318	2.56331e-09	2.1522e-06	11.7463
S100a11	1.48386	9.31823	11.5451	3.23607e-09	2.52298e-06	11.4564		Zfp36l1	1.62582	8.59703	12.8155	7.01384e-10	4.92119e-07	13.0266		S100a4	1.81355	7.02882	10.9684	6.77603e-09	5.28289e-06	10.622
Tox	4.35304	5.88661	11.3135	4.33862e-09	2.97859e-06	9.34932		Sh2d1a	2.16669	8.17218	12.7892	7.2298e-10	4.92119e-07	12.9681		Shisa5	-0.753119	11.6314	-10.7525	9.00561e-09	6.55308e-06	10.1471
Cd47	-1.23767	9.05711	-11.3085	4.36623e-09	2.97859e-06	11.2057		Slamf6	2.32915	8.35128	12.7372	7.67908e-10	4.92119e-07	12.9252		Zyx	1.03638	8.59686	10.5588	1.16686e-08	7.96016e-06	10.2573
Itgb1	2.05367	10.1547	11.0017	6.48717e-09	4.16514e-06	10.7338		Id2	-1.52386	10.7756	-12.7076	7.94751e-10	4.92119e-07	12.8284		Emp3	2.02723	7.412	10.4119	1.42363e-08	9.14051e-06	9.943
Lpar6	-2.47372	7.33223	-10.9445	6.99141e-09	4.23951e-06	10.6496		Esyt1	-1.51575	8.558	-12.6896	8.11557e-10	4.92119e-07	12.8721		S1pr1	1.62476	7.99531	10.3299	1.59229e-08	9.65546e-06	9.91364
Pydc3	-1.33548	8.78967	-10.8129	8.31371e-09	4.77601e-06	10.563		Shisa5	0.86277	11.6314	12.1175	1.59878e-09	9.18459e-07	11.8058		Itga4	3.25484	7.43717	9.97161	2.61738e-08	1.46841e-05	8.91544
Il2rb	-1.78564	9.98557	-10.6481	1.03505e-08	5.64876e-06	10.2208		Itgb7	-1.69749	9.52977	-11.9633	1.92798e-09	1.05219e-06	12.0129		Gm4956	-2.92933	5.78886	-9.95199	2.69063e-08	1.46841e-05	8.4496
Serinc3	-1.21482	8.83267	-10.5474	1.18488e-08	6.15857e-06	10.208		Ly6a	1.52984	9.55165	11.6742	2.75338e-09	1.4311e-06	11.637		Anxa2	3.7817	7.78574	9.68785	3.91684e-08	1.97998e-05	8.79065
Txk	-2.96349	7.45499	-10.4031	1.4407e-08	7.14786e-06	9.87614		Slamf7	-2.66581	7.32387	-11.3835	3.96863e-09	1.96898e-06	10.8439		Icos	-1.39239	8.5431	-9.67483	3.99079e-08	1.97998e-05	9.03913
Rcbtb2	-2.12719	7.20847	-10.3127	1.63025e-08	7.61565e-06	9.79754		Tox	2.45129	5.88661	11.0311	6.24373e-09	2.96306e-06	10.4825		Lpar6	-1.72643	7.33223	-9.59949	4.44846e-08	2.11109e-05	8.89718
Emb	-2.63406	7.35036	-10.2931	1.67454e-08	7.61565e-06	9.80798		Ctsb	1.26607	9.55009	10.7842	8.6348e-09	3.92703e-06	10.4628		Tubb5	1.08715	10.405	9.44674	5.55436e-08	2.44216e-05	8.51733
2010016I18Rik	2.53119	6.59997	10.0529	2.33542e-08	1.01965e-05	9.35115		Ccnd3	-1.98219	8.36746	-10.7405	9.15115e-09	3.99539e-06	10.4884		Rtp4	-2.28232	6.58749	-9.40088	5.94015e-08	2.44216e-05	8.19779
Zfp36l1	1.17008	8.59703	10.009	2.48345e-08	1.04257e-05	9.44122		Tnfaip8	1.75145	7.45204	10.6833	9.87438e-09	4.14534e-06	10.3736		1110002B05Rik	-1.99648	7.90005	-9.39764	5.96845e-08	2.44216e-05	8.63955
Nfatc1	1.67531	9.15581	9.71761	3.7532e-08	1.51726e-05	8.97624		Cd48	-1.72766	9.11299	-10.6321	1.05753e-08	4.27518e-06	10.3163		Hmgn2	0.959119	9.85363	9.3894	6.04107e-08	2.44216e-05	8.51654
Slamf7	-2.30084	7.32387	-9.67251	4.00412e-08	1.56089e-05	8.87428		Emp3	-2.26857	7.412	-10.4384	1.37325e-08	5.35321e-06	10.0339		Ccl5	2.24326	10.8998	9.31225	6.76795e-08	2.61979e-05	8.09827
Crot	-1.64811	7.67438	-9.61864	4.32713e-08	1.62864e-05	8.9737		Il27ra	1.54273	8.81276	10.3974	1.45207e-08	5.46529e-06	10.0305		Gimap4	-0.566202	11.1769	-9.29326	6.9605e-08	2.61979e-05	8.07877
Cxcr5	12.2104	2.8463	9.42051	5.7717e-08	2.09994e-05	0.728983		Nkg7	-2.31113	10.4651	-10.3659	1.51568e-08	5.51456e-06	9.80588		Birc5	3.57237	5.96439	9.16229	8.45638e-08	3.02e-05	6.84753
Cd226	-1.93059	8.25838	-9.31649	6.72568e-08	2.36809e-05	8.52856		Tbx21	-2.28515	8.0862	-10.202	1.89861e-08	6.68494e-06	9.74181		Fam65b	1.20781	8.12659	9.1528	8.57717e-08	3.02e-05	8.30387
Gm4956	-3.59459	5.78886	-9.21807	7.78174e-08	2.6543e-05	7.566		Epsti1	-1.53256	7.63758	-10.1583	2.01682e-08	6.6934e-06	9.68203		Stat1	-0.950098	9.78966	-9.12475	8.94489e-08	3.05105e-05	8.14995
Bcap31	-0.960139	8.68759	-9.15429	8.55808e-08	2.83065e-05	8.20683		Cd47	-1.12479	9.05711	-10.1559	2.02366e-08	6.6934e-06	9.68804		Rrm2	2.35549	7.2153	8.99464	1.08803e-07	3.59874e-05	7.8878
Sept1	-0.74321	9.66947	-9.08173	9.54134e-08	3.06305e-05	7.9348		Tagln2	-1.53128	8.99889	-10.0942	2.20486e-08	7.07825e-06	9.5957		Crot	-1.39086	7.67438	-8.90848	1.24006e-07	3.98097e-05	7.93717
Tnfaip8	1.3624	7.45204	9.04054	1.01516e-07	3.16585e-05	8.13098		Cxcr5	8.14297	2.8463	10.0698	2.28123e-08	7.11416e-06	3.74706		Dgka	0.959408	8.80985	8.75026	1.58028e-07	4.87053e-05	7.68489
Rabgap1l	2.03959	7.49626	9.01713	1.05166e-07	3.18858e-05	8.10393		Ccl5	-3.1854	10.8998	-9.95158	2.69218e-08	8.16253e-06	9.12381		Ltb	-1.44088	9.62321	-8.73963	1.60641e-07	4.87053e-05	7.59004
Ephx1	2.55829	6.31208	8.95813	1.14991e-07	3.39222e-05	7.93111		Tcf7	1.4313	8.13314	9.88477	2.95837e-08	8.72718e-06	9.30814		Ccr2	-1.43679	5.43396	-8.55094	2.15385e-07	6.31293e-05	7.40303
Ptpn5	9.50309	-0.524827	8.88607	1.28315e-07	3.68567e-05	0.474846		Dnajc15	-2.02636	7.02958	-9.80629	3.30683e-08	9.49845e-06	9.06499		S100a6	1.80357	7.93833	8.53803	2.19781e-07	6.31293e-05	7.38448
Ms4a4b	-1.19855	10.7661	-8.73797	1.61052e-07	4.50738e-05	7.22912		Itgb2	-0.716202	10.5668	-9.42859	5.70377e-08	1.57079e-05	8.3573		Ly6c2	1.83936	9.89658	8.46615	2.46065e-07	6.88666e-05	7.0279
Ccnd3	-1.61667	8.36746	-8.54268	2.18187e-07	5.95378e-05	7.36957		Ly6c2	-2.36361	9.89658	-9.42054	5.77142e-08	1.57079e-05	8.48285		Cd48	1.19473	9.11299	8.39546	2.75145e-07	7.50801e-05	7.04765
Ikzf2	1.9918	6.59203	8.41149	2.68248e-07	7.09162e-05	7.14848		H2afz	-1.51821	9.62935	-9.40546	5.90037e-08	1.57079e-05	8.41408		Cxcr3	-0.989953	9.23984	-8.24256	3.51081e-07	9.34647e-05	6.84048
Samhd1	-1.32226	7.57129	-8.40068	2.72879e-07	7.09162e-05	7.17278		Fam65b	-1.30354	8.12659	-9.27626	7.13784e-08	1.81835e-05	8.46987		Tuba1b	1.65823	9.13596	8.16735	3.96218e-07	0.000102969	6.74103
Dok2	-1.34818	8.74942	-8.3785	2.82643e-07	7.17453e-05	7.02537		Bcl2a1b	1.63513	7.42519	9.27385	7.16344e-08	1.81835e-05	8.45844		Stmn1	3.13161	7.15937	8.13646	4.16482e-07	0.000105719	6.55612
Gimap4	-0.511985	11.1769	-8.21579	3.66492e-07	8.63982e-05	6.14927		Efhd2	-1.57238	8.10058	-9.25015	7.41956e-08	1.84056e-05	8.44221		Ccnd2	-0.700468	9.63503	-8.11382	4.32018e-07	0.000106213	6.54986
Tpst2	-1.43436	8.05633	-8.20971	3.70091e-07	8.63982e-05	6.85332		Ms4a4b	-1.24935	10.7661	-9.12249	8.97515e-08	2.17697e-05	7.88487		Cd82	-1.10852	9.34346	-8.10445	4.3863e-07	0.000106213	6.60735
Sema4a	-2.46897	7.74543	-8.20876	3.70659e-07	8.63982e-05	6.86797		Rasgrp2	-3.14283	6.05251	-8.87782	1.2994e-07	3.08172e-05	7.2016		Pycard	1.23545	8.22976	8.09193	4.47624e-07	0.000106213	6.67765
Lsp1	-0.837576	10.085	-8.20646	3.72031e-07	8.63982e-05	6.47835		S100a11	1.06036	9.31823	8.86407	1.32699e-07	3.08172e-05	7.66063		Bcap31	-0.803547	8.68759	-8.07423	4.60671e-07	0.000106984	6.60169
Anxa6	-1.30984	9.15794	-8.16631	3.96882e-07	8.988e-05	6.66874		Limd2	0.727645	10.2709	8.80622	1.44994e-07	3.29709e-05	7.43045		Ahnak	1.87437	7.43681	8.04429	4.83663e-07	0.000109983	6.59639
Cd97	-1.09823	9.06517	-8.15485	4.0429e-07	8.988e-05	6.60478		Ephx1	2.81698	6.31208	8.76554	1.54351e-07	3.43824e-05	7.49889		Cdkn2d	1.78466	6.71189	7.99622	5.2312e-07	0.000114524	6.43403
Tbx21	-1.86132	8.0862	-8.14356	4.11727e-07	8.988e-05	6.76932		Actr3	-0.640677	10.7119	-8.70101	1.70518e-07	3.64569e-05	7.15941		Klrd1	1.70288	6.46794	7.98643	5.3156e-07	0.000114524	6.51409
Itgb2	-0.622492	10.5668	-8.13116	4.20062e-07	8.99015e-05	6.24448		Lpxn	0.949643	8.59798	8.69603	1.71836e-07	3.64569e-05	7.5614		Emb	-1.49058	7.35036	-7.98236	5.35112e-07	0.000114524	6.51937
Lrmp	1.3172	7.62089	8.0948	4.45542e-07	9.21896e-05	6.67559		Tigit	2.64963	3.82858	8.68292	1.75361e-07	3.64569e-05	7.22114		Klre1	3.33325	4.42462	7.95914	5.55853e-07	0.000114709	6.33262
1110002B05Rik	-1.65474	7.90005	-8.0919	4.47645e-07	9.21896e-05	6.61934		H2-D1	-0.418728	12.4901	-8.67683	1.77024e-07	3.64569e-05	6.58999		Hsd11b1	1.4345	7.66085	7.95789	5.56994e-07	0.000114709	6.48051
Obfc2a	-1.79061	7.20047	-7.94285	5.709e-07	0.000114454	6.45304		Nfatc1	1.41727	9.15581	8.61688	1.94308e-07	3.92755e-05	7.30629		Myo1f	1.23352	8.44942	7.93878	5.7473e-07	0.00011617	6.40975
H2-D1	-0.382706	12.4901	-7.93256	5.80629e-07	0.000114454	5.28686		Cdc42	-0.728722	10.2417	-8.49893	2.33691e-07	4.63771e-05	6.94813		Sept1	-0.607633	9.66947	-7.85865	6.55803e-07	0.000128329	6.09546
Gm14446	-2.62376	6.4527	-7.92523	5.87666e-07	0.000114454	6.29874		Ptpn5	8.95564	-0.524827	8.37416	2.84598e-07	5.54712e-05	-0.0523396		Ccnb2	4.33127	5.79861	7.85626	6.58397e-07	0.000128329	4.64443
Il2rg	-0.574019	11.0155	-7.91493	5.97697e-07	0.000114454	5.70169		Ptplad1	1.33625	7.49459	8.36253	2.89901e-07	5.55135e-05	7.11512		Cdc20	3.36293	5.69747	7.82183	6.97002e-07	0.000132735	4.80847
Cst7	1.72767	7.47177	7.89142	6.21288e-07	0.00011692	6.36733		Tbc1d4	3.30061	6.1522	8.24221	3.51275e-07	6.47826e-05	6.41262		Pydc3	-0.861529	8.78967	-7.81466	7.05328e-07	0.000132735	6.14596
Sla	-0.9412	8.75463	-7.76219	7.69559e-07	0.000142368	5.98857		Slc9a9	2.33588	6.96167	8.23781	3.53761e-07	6.47826e-05	6.86786		H2afx	2.16177	6.97718	7.77594	7.52165e-07	0.000139151	6.09711
Itgb7	-1.14666	9.52977	-7.71976	8.25983e-07	0.00015026	5.84585		Ccnb2	-2.54099	5.79861	-8.23369	3.56111e-07	6.47826e-05	6.80467		Tuba1c	1.65517	6.73661	7.71314	8.35157e-07	0.000151929	6.01825
2310001H17Rik	2.38048	5.559	7.6747	8.90643e-07	0.000159367	5.84362		Gm5506	-1.04095	8.51562	-8.17286	3.92708e-07	7.0269e-05	6.74194		Fth1	-0.68548	10.4563	-7.69781	8.56844e-07	0.000153319	5.67672
Prkca	2.49398	6.23329	7.65808	9.15831e-07	0.000160477	5.86366		Ly6e	0.800634	12.2152	8.15987	4.01028e-07	7.06003e-05	5.89729		Rasgrp2	1.74337	6.05251	7.65487	9.20778e-07	0.000160106	5.88388
Cpeb1	8.35665	-1.10196	7.63976	9.44441e-07	0.000160477	-0.0450475		Sema4a	-2.46122	7.74543	-8.14219	4.1264e-07	7.14914e-05	6.74822		Vim	3.53648	6.26986	7.64565	9.35138e-07	0.000160106	5.63053
Rilpl2	1.47504	6.73433	7.63893	9.45761e-07	0.000160477	5.96693		S1pr1	-1.22372	7.99531	-8.07191	4.62412e-07	7.86238e-05	6.59963		Ptprc	0.691194	11.0538	7.64334	9.38779e-07	0.000160106	5.46356
Itga4	2.58423	7.43717	7.63273	9.55661e-07	0.000160477	5.93425		Dpp4	1.7937	7.22822	8.0642	4.68241e-07	7.86238e-05	6.64579		Klrk1	1.20069	7.17546	7.54854	1.10151e-06	0.000184969	5.65259
Srgn	0.716525	10.1814	7.60511	1.00114e-06	0.000164137	5.39228		Tpst2	-1.40799	8.05633	-8.05485	4.75416e-07	7.86238e-05	6.62086		Plec	1.96128	6.34304	7.50958	1.1767e-06	0.000194601	5.55797
Gdi2	0.967529	9.0485	7.60133	1.00753e-06	0.000164137	5.62792		Birc5	-2.0898	5.96439	-7.96825	5.47616e-07	8.92124e-05	6.43487		Atp8a2	-2.98041	4.74088	-7.49413	1.20799e-06	0.000196794	5.25406
Hif1a	1.09983	8.60045	7.55942	1.08141e-06	0.000173582	5.62911		Tpm4	-1.08857	8.67034	-7.93088	5.82232e-07	9.34568e-05	6.31042		Spry2	2.72996	5.73967	7.47117	1.2561e-06	0.000201623	5.36945
Rnf166	-1.6092	7.25887	-7.49571	1.20476e-06	0.000189555	5.72878		Racgap1	-2.62373	5.63188	-7.90988	6.02691e-07	9.53388e-05	6.29295		Prf1	2.04217	4.97754	7.41512	1.38217e-06	0.000218643	5.5631
Ctsb	0.807773	9.55009	7.49041	1.21566e-06	0.000189555	5.28384		2010016I18Rik	1.59346	6.59997	7.86322	6.5087e-07	0.000101489	6.32829		Atp1b3	1.14398	9.14921	7.40075	1.41658e-06	0.000220885	5.41591
Hcst	-0.852934	8.74703	-7.47542	1.24706e-06	0.000191713	5.48529		Ctsw	-1.23195	9.51501	-7.84351	6.72422e-07	0.000102399	6.07069		Ywhaq	0.880633	8.8501	7.38901	1.44536e-06	0.000222199	5.44706
Satb1	-2.94069	7.03139	-7.45691	1.28699e-06	0.000194747	5.64338		Serpinb9	-2.09616	7.09026	-7.84078	6.75466e-07	0.000102399	6.2759		Anapc5	1.26094	7.77368	7.35892	1.52192e-06	0.000230719	5.49646
Ctsw	-1.16712	9.51501	-7.4499	1.30247e-06	0.000194747	5.34694		Klf13	-1.0292	8.68855	-7.83188	6.85495e-07	0.000102496	6.16283		Esyt1	0.738312	8.558	7.33199	1.59406e-06	0.000238344	5.34324
Rtp4	-1.56725	6.58749	-7.43728	1.33082e-06	0.000196296	5.63567		Hsd11b1	-1.48732	7.66085	-7.78714	7.38283e-07	0.000108897	6.18267		Pde3b	-1.91174	6.53437	-7.30689	1.6645e-06	0.000245513	5.28607
Rbl2	-1.37531	7.92131	-7.40418	1.40829e-06	0.000204953	5.49272		S1pr4	-1.50941	7.23113	-7.74769	7.88371e-07	0.000114734	6.1434		Racgap1	4.548	5.63188	7.27998	1.74364e-06	0.000253758	3.67376
Rora	-3.37261	5.90624	-7.34988	1.54576e-06	0.000222	5.13086		Ostf1	-1.33091	7.72503	-7.73773	8.01577e-07	0.000115121	6.11412		Rora	-2.12797	5.90624	-7.23917	1.87127e-06	0.000268749	5.17959
Abi3	-2.53809	5.60736	-7.21855	1.93943e-06	0.000274921	4.98887		Rabgap1l	1.61941	7.49626	7.70705	8.437e-07	0.000119597	6.04602		S1pr5	4.33665	2.84822	7.22104	1.93106e-06	0.000273734	3.87319
Tnfsf8	8.67019	2.74349	7.2053	1.9846e-06	0.000277716	-0.10854		Cpeb1	8.38968	-1.10196	7.66995	8.97774e-07	0.000125631	-0.373656		Atp2a3	0.947201	8.56496	7.20885	1.9724e-06	0.00027601	5.17068
Sesn1	-1.83373	7.53045	-7.15954	2.14921e-06	0.000294694	5.12983		Anxa2	-1.86022	7.78574	-7.62165	9.73645e-07	0.000134523	5.80831		Kpna2	2.33583	7.48487	7.1948	2.02116e-06	0.000279253	5.22551
Sephs2	-1.42413	8.12191	-7.15669	2.15992e-06	0.000294694	5.07677		Vim	-3.61849	6.26986	-7.5388	1.11982e-06	0.000152786	5.65665		Glipr2	2.39959	6.34383	7.14623	2.19972e-06	0.000300124	5.07317
Nrp1	2.94204	6.6039	7.12483	2.28352e-06	0.000303994	5.02209		Ifi27l2a	1.4223	8.85444	7.52228	1.15161e-06	0.000155183	5.5841		Gm6682	1.61513	6.77723	7.1254	2.28127e-06	0.000307408	5.061
Angptl2	10.4245	1.1386	7.12476	2.28379e-06	0.000303994	-0.118332		Calm1	-0.829658	10.3311	-7.50986	1.17615e-06	0.000156557	5.24883		Rrm1	2.54102	6.89244	7.03822	2.65838e-06	0.000353857	4.88084
D16Ertd472e	-2.28144	6.56599	-7.04546	2.6247e-06	0.000345163	4.9282		Rap1b	-1.6428	9.36921	-7.49627	1.20361e-06	0.000158282	5.49305		Gpr114	-2.20817	5.6298	-6.95174	3.09716e-06	0.000406413	4.64546
Il1r2	8.28979	-1.07512	7.01945	2.74774e-06	0.000357043	-0.290221		Sept11	-2.1946	6.83219	-7.46603	1.26714e-06	0.00016363	5.64914		Il27ra	-1.0546	8.81276	-6.9447	3.13609e-06	0.000406413	4.73022
Dck	1.2561	7.34793	6.968	3.00923e-06	0.00038642	4.82095		Hif1a	1.07879	8.60045	7.46274	1.27426e-06	0.00016363	5.49881		Itga1	2.71992	4.2859	6.93954	3.16492e-06	0.000406413	4.31401
Tigit	8.34443	3.82858	6.93476	3.19184e-06	0.000405104	0.507449		Cd7	-8.55301	6.25663	-7.42685	1.35474e-06	0.000171942	1.82275		Fgl2	1.93337	6.26237	6.91229	3.32181e-06	0.000413897	4.74544
Gramd3	-1.95223	7.7074	-6.90629	3.35744e-06	0.000421224	4.70488		2310001H17Rik	2.41265	5.559	7.38857	1.44644e-06	0.00018147	5.28836		Sgk1	2.42815	4.79882	6.91089	3.33008e-06	0.000413897	4.23133
Ccr2	-9.30548	5.43396	-6.82315	3.89439e-06	0.000483037	0.732365		Jak1	-0.713115	9.28845	-7.36529	1.50538e-06	0.00018489	5.24502		Mki67	3.45815	5.69162	6.90973	3.33696e-06	0.000413897	4.00436
Pydc4	-1.34188	7.11043	-6.80976	3.98886e-06	0.000489195	4.55933		Sccpdh	3.49988	3.50162	7.36206	1.51373e-06	0.00018489	5.17892		Efhd2	0.987161	8.10058	6.87865	3.52682e-06	0.000432531	4.60992
Ero1l	-1.86136	6.68103	-6.79556	4.09175e-06	0.000496239	4.55317		Lfng	-1.6472	7.29513	-7.35793	1.52452e-06	0.00018489	5.50517		Gimap3	-0.540185	10.8206	-6.82185	3.90343e-06	0.000473399	4.01923
Ptprc	0.633614	11.0538	6.77126	4.27423e-06	0.000512673	3.69674		Nt5e	2.09383	6.39371	7.33043	1.59833e-06	0.000191712	5.38473		Mcm7	1.31017	7.01196	6.8115	3.9765e-06	0.000476962	4.56734
Tbc1d4	1.64336	6.1522	6.75434	4.40627e-06	0.000522766	4.46852		Mmd	2.50216	5.7648	7.28254	1.73597e-06	0.000205958	5.18257		Cenpa	2.84803	5.88518	6.78455	4.17335e-06	0.000495131	3.96196
Txnip	-1.78605	7.94962	-6.7441	4.4882e-06	0.000526761	4.37336		Fgl2	-3.70311	6.26237	-7.25419	1.82321e-06	0.000213982	4.95612		Mcm3	1.6729	6.97011	6.77105	4.27584e-06	0.000501837	4.48451
Penk	10.038	-0.527479	6.72331	4.65962e-06	0.000534991	-0.329042		Klrg1	-4.14364	6.35578	-7.2104	1.96709e-06	0.000228413	5.19055		Flna	1.50658	8.09594	6.72524	4.64337e-06	0.000539174	4.3894
Maf	1.58955	5.98362	6.72099	4.67912e-06	0.000534991	4.42285		Asap1	1.67232	7.0778	7.11727	2.31393e-06	0.000265858	5.10005		Ramp1	-2.32113	6.70937	-6.6788	5.04974e-06	0.000580188	4.24222
Vmp1	0.917036	7.67805	6.71789	4.70537e-06	0.000534991	4.29304		S100a6	-1.43287	7.93833	-7.09267	2.41582e-06	0.000274674	4.94596		Mppe1	-1.24996	6.67391	-6.66607	5.16753e-06	0.000587537	4.31104
Mmd	2.0058	5.7648	6.70132	4.84824e-06	0.000545552	4.37525		Myo1f	-1.12531	8.44942	-7.07379	2.49719e-06	0.000280998	4.84838		Asb2	-2.02045	7.7104	-6.65844	5.23947e-06	0.000589575	4.31714
Prnp	8.002	-1.24913	6.69245	4.92664e-06	0.000548717	-0.512804		Mbnl1	-0.661785	9.92051	-7.06113	2.55335e-06	0.000283056	4.61879		Reep5	1.45968	7.37238	6.6407	5.41076e-06	0.000597092	4.28523
Hsp90ab1	0.432111	10.432	6.67242	5.10841e-06	0.000563215	3.63798		Tuba1c	-1.54437	6.73661	-7.05001	2.60378e-06	0.000283056	4.98911		Il2rg	-0.457108	11.0155	-6.6402	5.41568e-06	0.000597092	3.60154
Gm12070	0.658302	9.65206	6.61924	5.62584e-06	0.00061406	3.75831		Il1r2	8.32282	-1.07512	7.04741	2.61569e-06	0.000283056	-0.593853		Cnr2	-2.86751	5.52497	-6.61234	5.69689e-06	0.000616573	3.71546
Dtx1	-1.94249	7.43591	-6.59316	5.89927e-06	0.00063753	4.14911		Tnfrsf4	2.99404	4.43672	7.04665	2.61921e-06	0.000283056	4.80834		Cks2	2.36786	6.00118	6.61152	5.70534e-06	0.000616573	3.87718
Ptpn6	0.808869	8.91421	6.57815	6.06287e-06	0.000643587	3.82221		Phactr2	2.38163	5.14845	7.0335	2.68055e-06	0.000286845	4.63671		Abi3	-1.7566	5.60736	-6.59776	5.84999e-06	0.000626006	4.05373
Rnaset2b	0.958633	7.70608	6.57721	6.07324e-06	0.000643587	4.03852		Glipr2	-2.84821	6.34383	-7.01276	2.78035e-06	0.000293794	4.86078		Pfn1	0.421895	11.8323	6.57416	6.10716e-06	0.000647181	3.26711
Mgat4a	-2.53247	5.44104	-6.54982	6.38466e-06	0.000670083	3.96935		Actg1	-0.479398	11.9309	-7.00891	2.79932e-06	0.000293794	3.81886		Lrrc8c	1.28198	6.36871	6.56684	6.18924e-06	0.000649572	4.11051
Phactr2	2.39166	5.14845	6.53749	6.53014e-06	0.000678824	3.86461		Smpdl3a	1.17404	8.66457	6.97644	2.96463e-06	0.000308181	4.65998		Lmo4	-2.475	6.22897	-6.49228	7.09415e-06	0.00072833	3.65699
Txnrd1	-1.28948	7.30194	-6.53207	6.59526e-06	0.000679125	4.03436		Pycard	-1.06716	8.22976	-6.96673	3.01597e-06	0.00031056	4.68732		Skap1	-0.673151	9.36993	-6.48669	7.16734e-06	0.00072833	3.76296
Serpinb1a	-7.68292	1.10376	-6.45843	7.54937e-06	0.000765885	-0.622017		Ctla2a	-2.31367	5.82864	-6.93173	3.20907e-06	0.000327355	4.37706		Ptplad1	-1.04644	7.49459	-6.48386	7.20471e-06	0.00072833	4.01114
Zyx	-0.841222	8.59686	-6.45548	7.59049e-06	0.000765885	3.76906		Maf	1.82327	5.98362	6.90684	3.35417e-06	0.000338825	4.67702		B4galnt1	-0.587548	9.84247	-6.48372	7.20656e-06	0.00072833	3.62995
Gpr114	-3.23576	5.6298	-6.45136	7.64832e-06	0.000765885	3.63771		Rab37	1.0521	8.1339	6.90193	3.3836e-06	0.000338825	4.62658		Mgat4a	-2.24515	5.44104	-6.47185	7.36546e-06	0.000737559	3.67782
Gbp4	-1.29663	8.32966	-6.42624	8.01069e-06	0.000794879	3.71511		Lbr	-0.769034	9.26862	-6.85955	3.64907e-06	0.000362088	4.35018		Dpysl2	0.836767	8.38852	6.44628	7.72015e-06	0.000766049	3.82952
Ispd	7.63144	-1.31193	6.4145	8.18599e-06	0.000804955	-0.679791		Hmgn2	-0.69178	9.85363	-6.84398	3.75196e-06	0.000368942	4.13374		Tgtp1	-1.43011	6.1359	-6.40499	8.33106e-06	0.000817537	3.81409
Dgka	0.73433	8.80985	6.40587	8.31752e-06	0.000810587	3.57167		Raf1	1.42514	7.68495	6.82306	3.89498e-06	0.000379587	4.52964		Klrg1	4.11829	6.35578	6.40125	8.38883e-06	0.000817537	3.6467
Actg2	7.28502	-1.43471	6.39986	8.41047e-06	0.000812392	-0.762505		Spry2	-3.25385	5.73967	-6.80378	4.03189e-06	0.000389452	4.27684		Xdh	2.06134	6.55469	6.39604	8.46999e-06	0.000818141	3.81351
Trip4	-2.2524	7.04818	-6.38919	8.57796e-06	0.000821302	3.82392		Lrrk1	-2.49092	5.88355	-6.77949	4.21151e-06	0.000403234	4.18635		Hist1h2ae	2.81739	5.3703	6.35813	9.08578e-06	0.000854435	3.19446
Apol7e	-2.20652	5.39279	-6.36867	8.90991e-06	0.000845667	3.59383		Klrk1	-7.16706	7.17546	-6.76578	4.31651e-06	0.000409693	2.69024		Mcm6	1.07367	8.24385	6.35691	9.10631e-06	0.000854435	3.71916
Acoxl	-8.03015	1.4305	-6.3387	9.41908e-06	0.000886287	-0.596044		Penk	10.071	-0.527479	6.74542	4.47754e-06	0.000421313	-0.623493		Gbp10	-3.54278	3.92116	-6.35297	9.17295e-06	0.000854435	1.41187
Klrb1c	-1.56102	8.78264	-6.32794	9.6093e-06	0.000896457	3.48145		Mki67	-2.49971	5.69162	-6.72287	4.66326e-06	0.000433542	4.37366		Tnfrsf25	-1.53986	6.45257	-6.35189	9.19147e-06	0.000854435	3.76289
Cyba	-0.846505	9.29562	-6.28631	1.03832e-05	0.000960442	3.22627		Prnp	8.03502	-1.24913	6.72006	4.68694e-06	0.000433542	-0.800099		Arhgdib	0.493282	11.006	6.34922	9.23713e-06	0.000854435	3.06051
Cnr2	-2.42134	5.52497	-6.27381	1.06279e-05	0.000974816	3.5931		Cdkn2d	-1.46963	6.71189	-6.64433	5.37527e-06	0.000493035	4.28758		Fcer1g	5.03601	5.50134	6.33194	9.5381e-06	0.000874861	2.98607
Lpin3	7.19362	-1.50086	6.26547	1.07945e-05	0.000981854	-0.872537		Cd4	1.2304	7.50678	6.63578	5.45929e-06	0.000494118	4.20611		Dek	0.934619	7.54402	6.31298	9.88011e-06	0.000891467	3.67739
Mcm6	1.07071	8.24385	6.22714	1.15962e-05	0.00104606	3.34612		Dapl1	-7.93268	-0.830396	-6.63393	5.47762e-06	0.000494118	-0.772424		Tnfsf8	7.65464	2.74349	6.31285	9.8825e-06	0.000891467	-1.66743
A330049M08Rik	7.59052	-1.3308	6.19162	1.23945e-05	0.0011089	-0.802864		Ikzf2	1.37633	6.59203	6.62386	5.57884e-06	0.000499123	4.24751		Plp2	3.14889	4.75117	6.30173	1.00892e-05	0.000902654	1.98003
Tnfrsf1b	1.13723	7.30104	6.17565	1.27716e-05	0.00113335	3.34915		Klrb1c	-1.63101	8.78264	-6.5928	5.90312e-06	0.000523842	4.01874		Bzw2	-1.04915	7.72376	-6.28144	1.04779e-05	0.000929803	3.6143
Epsti1	-0.972742	7.63758	-6.16869	1.29397e-05	0.001139	3.37149		Tmem71	-1.92355	6.91898	-6.58577	5.9792e-06	0.000526314	4.19042		Cks1b	2.83976	5.74667	6.27658	1.05731e-05	0.000930686	3.32257
Prkx	-2.02826	6.07407	-6.15359	1.33126e-05	0.00115615	3.38428		Cd44	0.928284	8.4617	6.55182	6.36135e-06	0.000555473	3.91252		Actr3	0.425116	10.7119	6.27043	1.06951e-05	0.000933899	2.97495
Prdx6	-1.01832	8.27958	-6.15206	1.33507e-05	0.00115615	3.15724		Klf6	-1.75642	6.30399	-6.53919	6.5099e-06	0.000563499	4.0492		Dnajc15	0.952674	7.02958	6.25351	1.10383e-05	0.000956218	3.57778
Lbh	1.39897	6.6958	6.14497	1.35301e-05	0.00115615	3.37399		Klf12	-7.31654	-1.09499	-6.53529	6.55652e-06	0.000563499	-0.919928		Rbl2	-1.04978	7.92131	-6.23723	1.13794e-05	0.000978002	3.47942
Ly6a	0.691516	9.55165	6.14387	1.35581e-05	0.00115615	2.7716		Cdk2ap2	0.845033	9.23918	6.51663	6.78432e-06	0.000577977	3.70074		Gbp6	-1.5378	6.60114	-6.2245	1.16536e-05	0.000992495	3.5413
Syt11	2.73392	5.49493	6.11649	1.42763e-05	0.00120489	3.18159		Capn2	-1.49894	7.01039	-6.51171	6.84584e-06	0.000577977	4.05098		Dut	1.29477	6.4948	6.22004	1.17514e-05	0.000992495	3.51432
Vars	-1.21484	7.72066	-6.11374	1.43505e-05	0.00120489	3.18255		Txk	-1.94422	7.45499	-6.5082	6.88999e-06	0.000577977	4.05418		Gm14446	-1.41698	6.4527	-6.21689	1.18208e-05	0.000992495	3.53898
Prdm1	-8.2768	1.80215	-6.10911	1.44764e-05	0.00120618	-0.717939		Ctsd	-0.632709	10.6355	-6.50451	6.93679e-06	0.000577977	3.33136		Ube2c	3.94444	5.54662	6.19839	1.22379e-05	0.00101967	2.72646
Esyt1	-0.777438	8.558	-6.08953	1.50219e-05	0.00124215	3.06499		BC021614	1.8173	5.57166	6.49248	7.09154e-06	0.000586395	3.87845		Baiap3	2.99236	5.81708	6.18542	1.25395e-05	0.00103689	3.09042
Ctla2a	-2.03505	5.82864	-6.03304	1.67182e-05	0.00136241	3.04996		Lsp1	-0.676033	10.085	-6.47344	7.34391e-06	0.000602159	3.47638		Lgals3	1.98814	4.54376	6.16961	1.29174e-05	0.0010601	3.33958
Lyst	-2.70065	6.05095	-6.0328	1.67259e-05	0.00136241	3.16554		Vmp1	0.874369	7.67805	6.46985	7.39252e-06	0.000602159	3.86898		Ero1l	-1.49969	6.68103	-6.15154	1.33638e-05	0.00108393	3.42246
Fasl	-5.37428	5.71887	-6.02815	1.68742e-05	0.00136431	1.79533		Atp1b3	-1.00366	9.14921	-6.45181	7.64195e-06	0.000617866	3.56868		Myo1g	1.37963	7.73698	6.14985	1.34064e-05	0.00108393	3.35302
Fam105a	-1.03348	8.29264	-6.01869	1.71803e-05	0.00137884	2.93217		Il2rb	-1.14291	9.98557	-6.44723	7.70667e-06	0.000618517	3.51783		Trip13	7.69553	1.90383	6.13296	1.38398e-05	0.00111	-1.73858
Ccng1	0.955584	7.68998	5.99302	1.80396e-05	0.00142272	2.95157		Ispd	7.66447	-1.31193	6.44226	7.77753e-06	0.000619648	-0.953104		Lpxn	-0.672946	8.59798	-6.12943	1.39322e-05	0.00111	3.24327
Qpct	-2.90074	5.00246	-5.99165	1.80865e-05	0.00142272	2.72881		Actg2	7.31804	-1.43471	6.42887	7.97192e-06	0.000630533	-1.03298		Srsf3	0.646881	8.9227	6.11226	1.43908e-05	0.00113823	3.13166
Ly6c1	-2.69751	5.86136	-5.99074	1.8118e-05	0.00142272	2.88511		Stat1	0.703128	9.78966	6.40538	8.32505e-06	0.000653726	3.41799		Ak3	1.84456	5.99454	6.10254	1.46573e-05	0.00114468	3.26817
Rgs10	2.30196	6.06534	5.97796	1.85643e-05	0.00144735	3.10996		Angptl2	7.81279	1.1386	6.37258	8.84568e-06	0.000685266	0.0256428		Ly6a	-0.838326	9.55165	-6.09931	1.47469e-05	0.00114468	3.05423
Nkg7	-1.41219	10.4651	-5.93769	2.00469e-05	0.00155186	2.40448		Cdc20	-1.55762	5.69747	-6.37218	8.85227e-06	0.000685266	3.81495		Dapl1	7.29167	-0.830396	6.09787	1.4787e-05	0.00114468	-1.79723
Klk1b27	7.37338	0.71695	5.92852	2.04016e-05	0.00156073	-1.01164		Arhgdib	-0.515579	11.006	-6.36582	8.95714e-06	0.000688501	2.9538		Anxa5	2.15791	5.96421	6.09407	1.48936e-05	0.00114482	2.98748
Hsp90b1	-0.658116	9.13885	-5.92734	2.04475e-05	0.00156073	2.56777		Lpin3	7.22665	-1.50086	6.29423	1.0231e-05	0.000780916	-1.13564		Rasa3	1.71165	7.11786	6.08576	1.51293e-05	0.0011548	3.29741
Psat1	1.36294	6.44192	5.91924	2.0767e-05	0.00157411	3.00186		Lmo4	2.43378	6.22897	6.27136	1.06766e-05	0.000809274	3.50861		Klf12	6.76617	-1.09499	6.04369	1.63839e-05	0.00124188	-1.90314
Tnfsf11	2.33922	4.63174	5.91354	2.09944e-05	0.00158037	2.9494		Cd97	-0.865609	9.06517	-6.26239	1.08569e-05	0.00081229	3.31374		Aldoa	-0.630907	9.51594	-6.00305	1.76986e-05	0.00133228	2.79745
Nedd4	-4.13791	5.59295	-5.90809	2.12149e-05	0.00158603	2.22926		S1pr5	-11.2342	2.84822	-6.26197	1.08653e-05	0.00081229	-0.820265		Snx10	2.00587	4.81502	5.99925	1.78269e-05	0.00133274	2.6298
Tgtp1	-1.38722	6.1359	-5.903	2.14226e-05	0.00159066	2.97202		Itgad	-8.28473	-0.600643	-6.24242	1.12694e-05	0.000836776	-0.933584		Txk	-1.01927	7.45499	-5.948	1.96561e-05	0.0014595	2.92488
Xcl1	-4.05771	5.64139	-5.89096	2.19227e-05	0.0016168	2.37718		A330049M08Rik	7.62355	-1.3308	6.21855	1.17842e-05	0.000869082	-1.0653		Cenpe	8.22106	2.60243	5.92707	2.04581e-05	0.00150879	-1.63198
Pkp3	0.971172	7.53702	5.86841	2.28917e-05	0.00167693	2.73133		Tsc22d3	-3.33951	5.87943	-6.21106	1.19507e-05	0.000875451	3.29042		Art2b	-1.5146	6.82092	-5.90603	2.12986e-05	0.00154458	2.97511
Cd53	-0.636106	10.3081	-5.85995	2.3267e-05	0.00169306	2.13127		Klrd1	-6.52769	6.46794	-6.19855	1.22343e-05	0.000890248	2.02074		Calm1	0.607035	10.3311	5.90472	2.13523e-05	0.00154458	2.36745
H2-K1	-0.330879	12.4694	-5.85147	2.36491e-05	0.00170947	1.41533		Zeb2	-9.95399	0.0913337	-6.18312	1.25938e-05	0.000905673	-0.885047		Ldha	0.52155	10.1176	5.90433	2.1368e-05	0.00154458	2.44841
Fyn	1.29082	7.01281	5.83818	2.42614e-05	0.00174219	2.7945		Gdi2	0.767291	9.0485	6.18234	1.26122e-05	0.000905673	3.07242		Klra1	5.5619	5.45949	5.89497	2.17547e-05	0.00156219	2.19379
Gstt3	7.73805	-0.996171	5.83374	2.44694e-05	0.00174564	-0.96169		Mrps6	1.68974	5.57261	6.15951	1.3165e-05	0.000932936	3.37209		Kif22	3.2606	5.40346	5.88717	2.20823e-05	0.0015718	2.2364
A430093F15Rik	3.53525	4.948	5.8203	2.51112e-05	0.0017798	1.97035		Cd83	3.17365	4.50088	6.15866	1.3186e-05	0.000932936	3.21461		5430421N21Rik	-7.26609	1.28811	-5.88469	2.21877e-05	0.0015718	-1.85946
Cd4	1.03636	7.50678	5.80524	2.58506e-05	0.00181564	2.59585		Rilpl2	1.11702	6.73433	6.15616	1.32483e-05	0.000932936	3.3992		Tcf7	1.22119	8.13314	5.88158	2.23206e-05	0.0015718	2.9057
Tnfrsf25	-1.47998	6.45257	-5.80099	2.60632e-05	0.00181564	2.76515		Cd244	-11.3838	1.22506	-6.15164	1.33613e-05	0.000934863	-0.879215		Tpm4	0.735466	8.67034	5.87346	2.26711e-05	0.00158625	2.66851
Nr1d1	-7.6302	1.13628	-5.79994	2.6116e-05	0.00181564	-0.794724		Stmn1	-1.62737	7.15937	-6.14349	1.3568e-05	0.000939892	3.27562		Anxa6	0.681582	9.15794	5.86442	2.30678e-05	0.00159228	2.48624
Lfng	-1.3238	7.29513	-5.78903	2.6672e-05	0.00184256	2.71031		Rgs10	2.28598	6.06534	6.1395	1.36703e-05	0.000939892	3.39702		Smc4	1.49622	7.76078	5.86256	2.31503e-05	0.00159228	2.83995
Tmsb10	-0.496676	11.6286	-5.77704	2.72965e-05	0.00186972	1.54221		Cap1	-0.696546	8.67236	-6.13868	1.36915e-05	0.000939892	3.09863		Apol7e	-1.51651	5.39279	-5.85975	2.32758e-05	0.00159228	2.78978
Eif4enif1	1.9977	6.1144	5.77494	2.74077e-05	0.00186972	2.74061		Rcbtb2	-1.33574	7.20847	-6.132	1.38647e-05	0.00094377	3.38385		Psat1	1.32699	6.44192	5.8583	2.33407e-05	0.00159228	2.85915
Gbp10	-2.84163	3.92116	-5.76927	2.771e-05	0.0018786	1.96541		Cytip	-1.28606	8.06146	-6.12986	1.39209e-05	0.00094377	3.19904		Ccr7	2.71775	6.3399	5.85456	2.35091e-05	0.0015938	2.76122
Cd7	-6.60912	6.25663	-5.71423	3.08268e-05	0.002077	0.675542		Samhd1	-0.990422	7.57129	-6.11666	1.42716e-05	0.000957618	3.30135		Gzmk	7.84739	0.0306373	5.83879	2.4233e-05	0.0016232	-1.83745
Tex2	-2.75916	5.59311	-5.66983	3.36047e-05	0.00224041	2.49016		Prdm1	-8.28753	1.80215	-6.11354	1.4356e-05	0.000957618	-0.991905		Vars	-1.08453	7.72066	-5.83863	2.42401e-05	0.0016232	2.76331
Dopey2	-1.48575	6.61549	-5.66895	3.36626e-05	0.00224041	2.51925		Hist1h2ae	-2.194	5.3703	-6.11234	1.43884e-05	0.000957618	3.29236		Tuba1a	1.25431	6.66491	5.82956	2.46671e-05	0.00164172	2.84008
Slc9a9	1.18626	6.96167	5.65245	3.47617e-05	0.00229954	2.33084		Tnfrsf1b	1.11254	7.30104	6.07154	1.55417e-05	0.00102811	3.1836		Kif14	7.27243	1.07653	5.8162	2.531e-05	0.00167429	-1.89871
Glrx	1.87021	7.35069	5.64341	3.53794e-05	0.0023263	2.40453		Anapc5	-1.05729	7.77368	-6.05275	1.61049e-05	0.00105894	3.08077		Tex2	-2.27111	5.59311	-5.79353	2.64412e-05	0.00173859	2.67857
Matk	2.0917	5.03624	5.6329	3.61123e-05	0.00236006	2.40332		Plec	-1.41826	6.34304	-5.97294	1.87429e-05	0.00122321	3.09144		Tubb4b	1.01259	8.03015	5.78866	2.66909e-05	0.0017445	2.64065
Grtp1	7.40644	-1.44935	5.62989	3.63252e-05	0.00236006	-1.17773		Asb2	1.86438	7.7104	5.97058	1.88273e-05	0.00122321	3.03911		Cdc42	0.455729	10.2417	5.78271	2.69993e-05	0.00175415	2.14805
Tle3	2.01304	5.93739	5.61846	3.7145e-05	0.00239904	2.44719		Ptpn22	0.663222	8.76927	5.95989	1.92152e-05	0.00123882	2.73137		Ctsd	0.529678	10.6355	5.77138	2.75968e-05	0.00178236	2.03118
Klrk1	-5.96636	7.17546	-5.61355	3.75027e-05	0.00240789	1.51406		Pdcd1lg2	2.20683	6.41127	5.95578	1.93665e-05	0.00123882	3.04675		Fkbp10	6.69499	-1.5565	5.7625	2.8075e-05	0.00180258	-2.12481
Nrgn	6.56667	0.471392	5.60781	3.79256e-05	0.0024208	-1.24238		Fyb	0.723632	8.25874	5.95466	1.94079e-05	0.00123882	2.8409		Wwp1	-2.46032	5.22541	-5.74614	2.89778e-05	0.00184369	2.37691
Ifi47	-0.839313	9.16426	-5.60073	3.84541e-05	0.00244027	1.90677		B4galt1	-0.808191	8.0393	-5.93467	2.01632e-05	0.00127954	2.84011		Klrb1f	2.46927	6.44178	5.7448	2.90531e-05	0.00184369	2.65959
4632428N05Rik	0.964337	7.87998	5.58342	3.97786e-05	0.00249608	2.09653		Ly6c1	-2.66481	5.86136	-5.90017	2.15389e-05	0.00135894	2.65701		Dtx1	-1.40384	7.43591	-5.73489	2.96162e-05	0.00186856	2.5841
F2rl2	-7.0287	3.57785	-5.58289	3.98197e-05	0.00249608	-0.338082		Bcl2a1d	1.59243	6.2228	5.89552	2.17317e-05	0.00136323	2.9518		Gem	3.38746	5.02435	5.72593	3.0135e-05	0.00189037	1.84558
Klf13	-0.750851	8.68855	-5.58034	4.00196e-05	0.00249608	2.01368		Rrm2	-1.23238	7.2153	-5.88082	2.23529e-05	0.00139241	2.79082		Capn2	1.11965	7.01039	5.70375	3.14601e-05	0.00196221	2.57527
Cyfip1	2.14283	5.07319	5.57658	4.0315e-05	0.00250022	2.25435		Aim1	-2.67463	6.05401	-5.87642	2.25424e-05	0.00139241	2.85751		Atp8a1	-1.5469	5.67739	-5.69261	3.21486e-05	0.00199376	2.43922
Tox2	9.21828	2.69175	5.54359	4.30087e-05	0.0026522	-0.548864		Spint2	1.24265	7.16105	5.87556	2.25797e-05	0.00139241	2.84273		Exo1	6.65479	1.44876	5.68815	3.24284e-05	0.00199833	-2.00153
Wwp1	-2.45768	5.22541	-5.53123	4.40652e-05	0.00269575	2.22403		Btla	1.76015	6.47859	5.85842	2.33353e-05	0.00142321	2.89303		Msn	0.577942	9.90074	5.68562	3.25885e-05	0.00199833	2.06487
Eea1	3.67526	4.59342	5.52776	4.43667e-05	0.00269575	1.43843		Muc20	-8.97169	-0.39376	-5.85832	2.33398e-05	0.00142321	-1.08983		Kif11	4.42887	4.57042	5.68272	3.27723e-05	0.00199838	0.981784
Tmem176b	-6.90796	3.07228	-5.52649	4.44777e-05	0.00269575	-0.687543		Utrn	1.13743	8.41482	5.85238	2.36077e-05	0.00142492	2.61485		Sesn1	-1.26403	7.53045	-5.6785	3.30424e-05	0.00200365	2.47087
Raf1	1.06586	7.68495	5.52392	4.47028e-05	0.00269575	1.99732		Sgk1	-3.8577	4.79882	-5.85191	2.36291e-05	0.00142492	1.78119		Atp1b1	2.18062	5.48593	5.66331	3.40338e-05	0.00204753	2.34945
Coro2a	-1.7763	6.15087	-5.51955	4.50881e-05	0.00270405	2.26548		Kif11	-3.18747	4.57042	-5.82739	2.47706e-05	0.00147475	2.4784		Xrn2	0.891519	7.88262	5.6617	3.41411e-05	0.00204753	2.40398
F2r	-2.38827	6.93265	-5.51436	4.55506e-05	0.00270589	2.24831		Fcer1g	-5.38984	5.50134	-5.82707	2.47858e-05	0.00147475	2.34878		Rpl36a	-0.581851	8.63525	-5.6552	3.45762e-05	0.00206229	2.27939
Endod1	2.34237	5.79252	5.51365	4.56146e-05	0.00270589	2.2584		Gpm6b	9.77089	1.09651	5.8255	2.48606e-05	0.00147475	-1.08685		Pltp	7.22495	-0.221135	5.64969	3.49491e-05	0.00207321	-1.941
Il18r1	-4.36801	4.7444	-5.50281	4.65971e-05	0.00271786	0.953637		Sephs2	-1.1791	8.12191	-5.79732	2.62483e-05	0.00154865	2.62126		Nkg7	0.898944	10.4651	5.62679	3.65453e-05	0.00215618	1.66229
Ces2c	6.35248	-1.77026	5.50244	4.66315e-05	0.00271786	-1.44661		Hpcal1	1.10608	7.2939	5.78442	2.69106e-05	0.00157919	2.66593		Trim59	2.14019	6.00332	5.62029	3.70123e-05	0.00217199	2.30099
Gapdh	0.613216	8.65873	5.50174	4.66956e-05	0.00271786	1.81467		Ptger2	2.1492	4.89447	5.76993	2.76746e-05	0.00161534	2.48008		Cmah	1.34066	5.79573	5.60436	3.81819e-05	0.00221789	2.38463
Mppe1	-1.00574	6.67391	-5.4983	4.70126e-05	0.00271786	2.14638		4632428N05Rik	1.01528	7.87998	5.75382	2.85501e-05	0.00164398	2.48929		Il4	-3.31111	5.10452	-5.60145	3.84e-05	0.00221789	1.10755
Nod1	-3.11452	5.52303	-5.49777	4.70614e-05	0.00271786	1.74607		Ccr2	-7.86869	5.43396	-5.75296	2.85978e-05	0.00164398	-0.302233		Tmsb10	-0.461294	11.6286	-5.6014	3.84042e-05	0.00221789	1.39568
Ptger2	1.8254	4.89447	5.48429	4.83279e-05	0.00277631	2.14639		Ahnak	-1.21006	7.43681	-5.75261	2.86172e-05	0.00164398	2.53303		Qpct	-1.91922	5.00246	-5.5938	3.89789e-05	0.00223923	2.20949
Icam1	-1.54577	7.15323	-5.4812	4.86228e-05	0.00277863	2.12939		Cxcr6	-1.55703	9.12761	-5.74933	2.87993e-05	0.00164578	2.53984		Lysmd2	-2.62613	5.48515	-5.57676	4.03005e-05	0.00230304	2.14469
Kcnn4	0.966022	7.48841	5.47236	4.94776e-05	0.00281275	1.98057		Tox2	6.87243	2.69175	5.74244	2.91862e-05	0.0016592	0.623931		Dck	1.00559	7.34793	5.55751	4.185e-05	0.00237913	2.32089
Padi2	-3.62077	5.39392	-5.4681	4.98946e-05	0.00282176	1.60778		Pecam1	1.6868	6.45345	5.73212	2.97756e-05	0.00168297	2.64982		Myl6	0.481545	9.94321	5.55474	4.20782e-05	0.00237971	1.80285
Tnfrsf4	6.77577	4.43672	5.45585	5.11155e-05	0.0028759	0.385078		Dok2	-0.958298	8.74942	-5.72975	2.99126e-05	0.00168297	2.36695		Il17rb	-4.73515	4.73984	-5.50342	4.65409e-05	0.00261734	0.0648896
Stk24	-1.36871	7.55976	-5.45319	5.13852e-05	0.00287625	2.01231		Obfc2a	-1.32703	7.20047	-5.72534	3.01698e-05	0.00168874	2.62393		Nfkbia	-0.912501	8.61099	-5.50104	4.67596e-05	0.00261734	2.01538
Lag3	7.43064	3.4201	5.43753	5.29992e-05	0.00295146	-0.513236		Inpp4b	1.2203	7.94665	5.71459	3.08054e-05	0.00171551	2.44141		Cdca7	2.55895	5.45565	5.48879	4.79015e-05	0.00266758	1.72551
Tnfrsf8	6.85029	-1.21293	5.42681	5.41336e-05	0.00299435	-1.37937		Grcc10	0.933519	8.34201	5.69909	3.17464e-05	0.0017494	2.33563		Slc25a24	2.1678	5.84331	5.48505	4.82554e-05	0.00267364	2.10037
Casp4	7.76432	2.72151	5.42509	5.4318e-05	0.00299435	-0.953355		Serpinb1a	-6.95869	1.10376	-5.69699	3.18761e-05	0.0017494	-1.38621		Mcm4	1.48956	7.3366	5.47405	4.93129e-05	0.00270934	2.1385
Atp8a2	-6.06963	4.74088	-5.41887	5.49906e-05	0.00301619	0.584835		H2afx	-1.3381	6.97718	-5.69669	3.18947e-05	0.0017494	2.48866		Tsc22d3	1.81645	5.87943	5.4732	4.93961e-05	0.00270934	2.18393
Sccpdh	9.46919	3.50162	5.41513	5.53997e-05	0.00301622	-0.7854		Ak3	-1.7933	5.99454	-5.67873	3.30282e-05	0.00180252	2.56366		2810417H13Rik	3.53841	6.53645	5.46811	4.98945e-05	0.00272299	2.124
Znrf3	-1.64754	5.90769	-5.41382	5.55437e-05	0.00301622	2.06669		Calm2	-0.633594	9.64435	-5.67076	3.3544e-05	0.00182156	1.96713		Itgad	7.16901	-0.600643	5.42351	5.44888e-05	0.0029451	-2.03945
Trim8	1.77196	6.58723	5.40653	5.63504e-05	0.00304488	2.00097		Ccl3	-8.37334	-0.684929	-5.66807	3.37204e-05	0.00182207	-1.23404		Serinc3	-0.543389	8.83267	-5.4212	5.4738e-05	0.0029451	1.72973
Ifngr1	-3.83701	7.54723	-5.40048	5.70301e-05	0.00306642	2.0496		Skap1	0.607416	9.36993	5.65785	3.43979e-05	0.00184952	2.04497		S1pr4	0.873215	7.23113	5.41768	5.51204e-05	0.0029451	1.99416
Fth1	-0.476279	10.4563	-5.3946	5.76977e-05	0.00308366	1.10862		Grtp1	7.43946	-1.44935	5.65499	3.45901e-05	0.00185074	-1.41042		Nek2	8.25886	2.40599	5.41528	5.53828e-05	0.0029451	-1.9934
Ccnd2	-0.461199	9.63503	-5.39025	5.81978e-05	0.00308366	1.32186		Rgs3	0.962822	7.53671	5.64426	3.53209e-05	0.00187709	2.35075		Rcbtb2	-0.79145	7.20847	-5.41368	5.55589e-05	0.0029451	1.96071
Spry1	7.5987	-0.78015	5.38992	5.82355e-05	0.00308366	-1.25793		Atp6ap2	0.926222	7.1936	5.64273	3.54266e-05	0.00187709	2.40116		Satb1	-1.33262	7.03139	-5.41346	5.55832e-05	0.0029451	1.96935
Plac8	-2.9042	6.2496	-5.3878	5.84808e-05	0.00308366	2.02162		Ece1	1.93252	5.47126	5.6369	3.58317e-05	0.00188939	2.42012		Nr1d1	-5.64389	1.13628	-5.41059	5.58992e-05	0.00294754	-1.13913
Spint2	1.09684	7.16105	5.37382	6.01255e-05	0.00315119	1.81635		Fkbp10	-6.54352	-1.5565	-5.63212	3.61672e-05	0.00189791	-1.48411		Zeb2	8.44578	0.0913337	5.40734	5.62601e-05	0.0029523	-1.89616
Lrrk1	-2.01264	5.88355	-5.37203	6.03388e-05	0.00315119	1.9352		Gzmk	-7.55119	0.0306373	-5.62724	3.65133e-05	0.00190227	-1.20326		Cmtm6	-0.837031	7.96566	-5.40218	5.6838e-05	0.00296836	1.90603
Tnfrsf1a	-1.74754	6.3083	-5.36793	6.08323e-05	0.00316183	1.97464		Dek	-0.847727	7.54402	-5.62604	3.65989e-05	0.00190227	2.29789		Adam19	-1.37125	6.62622	-5.39471	5.76854e-05	0.00299827	2.03633
Gabarapl2	-0.973283	8.37762	-5.36209	6.15412e-05	0.00318342	1.62782		Cd9	1.35146	6.48504	5.61972	3.70537e-05	0.00191158	2.44		Lrrc8a	1.3043	6.19043	5.38571	5.87242e-05	0.0030378	2.02217
Limd2	0.41886	10.2709	5.35972	6.1831e-05	0.00318342	1.07915		Cd82	0.80977	9.34346	5.61869	3.71282e-05	0.00191158	1.99973		Ran	0.732573	9.06904	5.37747	5.96907e-05	0.00306665	1.66912
Bcl6	3.73803	5.10595	5.35276	6.26918e-05	0.00321259	1.91122		Prf1	-7.55026	4.97754	-5.61401	3.74692e-05	0.00191698	0.0810345		Ly6i	6.23937	-0.422949	5.37618	5.98439e-05	0.00306665	-2.21437
Marcksl1	4.16635	4.39879	5.34565	6.3584e-05	0.00323201	0.963672		Cmah	-1.43451	5.79573	-5.61244	3.75843e-05	0.00191698	2.43615		Tagln2	0.68148	8.99889	5.3691	6.06903e-05	0.00309549	1.57377
Camk2d	0.96832	6.59718	5.34503	6.3663e-05	0.00323201	1.87706		Adam19	1.44671	6.62622	5.60281	3.82983e-05	0.00193769	2.41979		Pola1	2.50997	4.88963	5.36463	6.12313e-05	0.00310856	1.46652
Nhedc2	7.41214	-0.902838	5.33693	6.46958e-05	0.00326923	-1.3153		Pltp	-7.18128	-0.221135	-5.60218	3.83454e-05	0.00193769	-1.26042		Socs2	-2.30844	4.01323	-5.33639	6.47653e-05	0.00327275	1.75631
Mrps6	1.37712	5.57261	5.32552	6.6181e-05	0.00332888	1.91049		G0s2	-8.17221	-0.206071	-5.59344	3.90067e-05	0.00196202	-1.27195		Tyms	1.62841	5.82559	5.3264	6.60657e-05	0.00330827	1.80202
Gcnt2	-7.55262	0.19414	-5.32227	6.66107e-05	0.00333512	-1.24307		Xrn2	-0.925109	7.88262	-5.5896	3.93006e-05	0.00196774	2.17648		Tyrobp	3.90664	4.9783	5.32633	6.60745e-05	0.00330827	1.86849
Tnfrsf9	1.58007	6.99048	5.30606	6.87957e-05	0.0034166	1.74468		Coro1a	-0.418951	11.2136	-5.56983	4.08519e-05	0.00203606	1.33199		Arhgap19	7.99737	1.90508	5.31062	6.81741e-05	0.00339781	-1.9969
Dgkz	1.05421	6.9121	5.30557	6.88641e-05	0.0034166	1.73193		Ces2c	6.3855	-1.77026	5.53104	4.40814e-05	0.00218704	-1.66703		Tmprss13	7.27422	-0.093137	5.30322	6.91874e-05	0.00343264	-2.05295
Ntrk3	7.7645	2.04707	5.29355	7.05335e-05	0.00348359	-0.73354		Serinc3	-0.671432	8.83267	-5.52451	4.46506e-05	0.00220367	1.93506		Tpx2	4.38652	4.44929	5.29496	7.03351e-05	0.00347379	0.227084
1810011H11Rik	-2.25065	4.23765	-5.27078	7.38116e-05	0.00362907	1.79081		Lgals3	-5.7125	4.54376	-5.52258	4.48205e-05	0.00220367	0.334632		Irf7	-1.28938	6.71697	-5.28515	7.17257e-05	0.00351703	1.82522
Spcs2	-0.533559	8.93112	-5.2648	7.46983e-05	0.00364325	1.26041		Snx10	-2.00295	4.81502	-5.51469	4.55208e-05	0.00222807	2.03611		Dnajc9	0.982257	7.3194	5.28424	7.1855e-05	0.00351703	1.75356
Tagln2	-0.849798	8.99889	-5.26434	7.47675e-05	0.00364325	1.34846		Itga1	-5.99138	4.2859	-5.50907	4.6027e-05	0.00224279	0.220861		Mbnl1	-0.40529	9.92051	-5.26118	7.52403e-05	0.00365429	1.15256
Klf6	-1.43764	6.30399	-5.2322	7.97298e-05	0.00386778	1.73589		Atp2a3	-0.721222	8.56496	-5.50511	4.63873e-05	0.0022503	1.85547		Trip4	-1.51504	7.04818	-5.2606	7.53289e-05	0.00365429	1.71939
Ipcef1	1.17449	6.66615	5.21259	8.29239e-05	0.00400493	1.62084		Rasa3	-1.54319	7.11786	-5.4941	4.74034e-05	0.00228942	2.11351		Gimap6	-0.398026	10.4433	-5.25728	7.58292e-05	0.00366228	1.08485
Nek7	1.20348	7.35265	5.18233	8.81125e-05	0.00423677	1.41824		Myo1g	-1.28458	7.73698	-5.48614	4.81517e-05	0.00231531	1.99869		B3gnt7	6.23287	-1.49334	5.24912	7.70766e-05	0.00370613	-2.35974
Herpud1	-1.11865	7.79384	-5.16867	9.05633e-05	0.00433361	1.36129		Trim8	1.69708	6.58723	5.48222	4.85258e-05	0.00232306	2.14973		Cd244	7.70931	1.22506	5.24182	7.82105e-05	0.00374415	-1.26922
Adam12	-6.53873	-1.24978	-5.16671	9.09205e-05	0.00433361	-1.53911		Lrrc8a	-1.43372	6.19043	-5.47343	4.93735e-05	0.00235333	2.18179		Cd226	-0.852281	8.25838	-5.23	8.00821e-05	0.00381701	1.43022
Mndal	-1.23164	6.94149	-5.15626	9.28504e-05	0.00439439	1.50059		Tnfsf11	4.615	4.63174	5.46448	5.02523e-05	0.00238112	0.982693		Bcl2a1b	-0.956849	7.42519	-5.20675	8.39005e-05	0.00395367	1.6549
Cdca7	2.44835	5.45565	5.15495	9.30947e-05	0.00439439	1.47519		Ube2c	-2.22189	5.54662	-5.46181	5.05177e-05	0.00238112	2.16427		Hmgb1	0.533728	9.98915	5.20642	8.39551e-05	0.00395367	1.11591
Ifi27l2a	0.901281	8.85444	5.1533	9.34035e-05	0.00439439	0.99517		Bhlhe40	-2.59071	6.17742	-5.46088	5.06111e-05	0.00238112	2.10078		Cd3d	-0.583527	10.1571	-5.20594	8.40358e-05	0.00395367	1.07623
Gm14718	6.87947	2.52321	5.1414	9.56665e-05	0.00448154	-0.90537		B3gnt7	-6.47764	-1.49334	-5.45526	5.11756e-05	0.00239638	-1.61724		Palm	7.10375	-0.480936	5.19835	8.53253e-05	0.00399711	-2.19348
Gpr183	1.54237	6.52356	5.10821	0.000102281	0.00477094	1.44161		Ifngr1	-3.87295	7.54723	-5.45329	5.13746e-05	0.00239638	2.14679		Ezh2	1.3187	6.09897	5.19088	8.66134e-05	0.00403389	1.63481
Myo1e	1.95599	6.0676	5.09847	0.00010431	0.00484486	1.48566		Tubb5	-0.592484	10.405	-5.44052	5.26863e-05	0.00244711	1.25168		Ywhah	0.7214	8.79762	5.18952	8.68496e-05	0.00403389	1.33641
Zfp512	-2.16297	5.73418	-5.08912	0.000106297	0.00491622	1.46613		Prkca	1.26255	6.23329	5.43062	5.37282e-05	0.00248493	2.04847		Phpt1	-2.2338	5.80124	-5.17837	8.88154e-05	0.00410016	1.4692
Ppp1r12a	-1.11679	7.3874	-5.0868	0.000106796	0.00491847	1.2635		Acoxl	-7.12056	1.4305	-5.42788	5.40193e-05	0.00248785	-1.49021		Prc1	4.29718	4.83245	5.17718	8.90278e-05	0.00410016	0.531557
Gpc1	-3.24933	5.57856	-5.07812	0.000108683	0.00498434	1.11516		Klrb1f	-2.0225	6.44178	-5.39893	5.72051e-05	0.0026235	2.00599		Top2a	4.78236	6.36931	5.17111	9.01196e-05	0.004133	1.42538
Akap6	6.67877	-1.66613	5.07181	0.000110077	0.00502716	-1.63693		Tmprss13	-7.47451	-0.093137	-5.38821	5.84329e-05	0.0026686	-1.37328		Rpl36	-0.587537	9.49276	-5.16195	9.17946e-05	0.00419221	1.12448
S100a4	-1.36977	7.02882	-5.04104	0.000117145	0.00532768	1.35543		Stk24	-1.35025	7.55976	-5.38383	5.89426e-05	0.00268066	1.91036		Sypl	1.34946	6.07138	5.15274	9.35097e-05	0.00425122	1.56512
Ccr9	-10.039	2.3138	-5.02501	0.000121009	0.0054671	-1.29236		Cd2	-1.00344	8.72465	-5.38152	5.92132e-05	0.00268179	1.62618		Muc20	7.85597	-0.39376	5.15085	9.38657e-05	0.00425122	-2.13293
Mboat7	1.39643	6.2177	5.02418	0.000121213	0.0054671	1.29514		Nras	-0.838458	7.60412	-5.37696	5.97521e-05	0.00269231	1.81802		1810011H11Rik	-5.53432	4.23765	-5.14492	9.49907e-05	0.00426409	-0.638143
Plekho1	7.47992	0.667866	5.01625	0.000123176	0.00553277	-1.39836		Cxcr3	0.684648	9.23984	5.37519	5.99612e-05	0.00269231	1.53172		Gm11346	1.93156	4.89283	5.14279	9.54e-05	0.00426409	1.43098
Socs2	-6.05633	4.01323	-5.01317	0.000123948	0.00554466	-0.254694		Prc1	-2.67107	4.83245	-5.37331	6.01854e-05	0.00269231	1.93022		Lyst	-1.60273	6.05095	-5.14249	9.54572e-05	0.00426409	1.56552
Rorc	-8.17063	1.19971	-5.00003	0.000127295	0.00564974	-1.40861		Rnaset2b	0.758108	7.70608	5.36404	6.13032e-05	0.00272745	1.73831		Rps9	-0.562704	10.3908	-5.14116	9.57125e-05	0.00426409	0.854869
Pecam1	1.39737	6.45345	4.99988	0.000127333	0.00564974	1.19583		Nod1	-3.04862	5.52303	-5.36267	6.14706e-05	0.00272745	1.42497		Ddx58	-0.759423	7.33283	-5.13569	9.67734e-05	0.00426847	1.4639
Got1	-1.66777	5.7417	-4.98927	0.000130105	0.00570156	1.28026		Dgkz	1.08455	6.9121	5.35853	6.19773e-05	0.0027388	1.87902		Jak2	-1.10725	6.405	-5.13306	9.72857e-05	0.00426847	1.55031
Pgcp	2.55943	3.94617	4.98868	0.00013026	0.00570156	1.06799		Lrrc8c	-1.03156	6.36871	-5.34635	6.34964e-05	0.00278081	1.91769		Klf2	2.20229	6.95006	5.13225	9.74456e-05	0.00426847	1.46742
Ece1	1.43823	5.47126	4.98835	0.000130346	0.00570156	1.2696		Il4ra	-2.09125	5.90088	-5.34494	6.36735e-05	0.00278081	1.88127		Txnrd1	-0.905006	7.30194	-5.13109	9.7672e-05	0.00426847	1.43906
Asap1	1.0267	7.0778	4.98743	0.00013059	0.00570156	1.03041		Gem	-2.31261	5.02435	-5.34479	6.36925e-05	0.00278081	1.90046		Troap	6.94957	-0.308992	5.13062	9.77661e-05	0.00426847	-2.20852
Rgs1	-1.38602	6.83127	-4.97278	0.000134534	0.00585037	1.13898		Endod1	2.02829	5.79252	5.33098	6.54658e-05	0.00284685	1.92001		Rab37	-0.786148	8.1339	-5.11941	9.99978e-05	0.00433467	1.35831
A130040M12Rik	-1.09538	9.15781	-4.9544	0.000139655	0.00604895	0.649812		Cd3g	0.581937	10.0833	5.32214	6.66286e-05	0.00288325	1.17848		Ap3s1	-1.25831	7.03221	-5.11902	0.000100077	0.00433467	1.48607
Ccr5	-7.27525	4.14887	-4.94988	0.000140945	0.00608067	-0.825655		Cfl1	-0.452667	11.5131	-5.32061	6.68312e-05	0.00288325	0.739226		Cytip	0.984232	8.06146	5.10432	0.000103087	0.0044474	1.26334
Exo1	5.99814	1.44876	4.94755	0.000141615	0.00608556	-1.62728		Klra1	-4.7957	5.45949	-5.30898	6.83968e-05	0.0029391	1.68181		Pdcd1lg2	-1.9	6.41127	-5.09254	0.000105564	0.00453636	1.43909
Prrt1	-3.85517	2.36593	-4.94006	0.00014379	0.00615477	-0.330197		Tuba1a	-1.1805	6.66491	-5.30702	6.86643e-05	0.0029391	1.81669		Gzma	6.79583	5.85432	5.09029	0.000106045	0.00453913	1.46937
Il21	8.13927	1.31512	4.92923	0.000146994	0.00626734	-1.43287		Il16	0.683013	9.05344	5.30418	6.90551e-05	0.00294428	1.38028		Esco2	7.66844	2.40163	5.08562	0.000107049	0.00456423	-2.09932
Fkbp1a	0.768949	8.10164	4.917	0.000150702	0.00640044	0.75164		Kpna2	-1.3834	7.48487	-5.29469	7.03738e-05	0.00298883	1.59462		S100a10	0.754356	9.8318	5.08112	0.000108027	0.004588	0.893841
Hs3st3b1	-6.49939	3.67105	-4.90319	0.000155007	0.00655776	-0.818736		Pkp3	0.856793	7.53702	5.29051	7.09623e-05	0.00300214	1.62619		Ccl3	7.46283	-0.684929	5.05173	0.000114639	0.00484994	-2.22517
Gm5506	-0.648524	8.51562	-4.90091	0.000155729	0.00656288	0.680047		Hmgn3	7.15786	-0.874436	5.28522	7.17151e-05	0.00302228	-1.63224		Hmmr	3.62947	4.45688	5.0451	0.000116186	0.00489641	0.322498
Il4ra	-1.93307	5.90088	-4.89589	0.000157333	0.00658109	1.09308		Srgn	0.479462	10.1814	5.27146	7.37123e-05	0.0030945	0.990755		Klra7	5.64397	4.29209	5.0415	0.000117036	0.00491325	1.11087
Cd83	5.31154	4.50088	4.89545	0.000157472	0.00658109	0.143209		Ywhaq	-0.622924	8.8501	-5.26395	7.48253e-05	0.00312919	1.30812		Cdc25b	1.92995	6.6289	5.02855	0.000120145	0.00502444	1.35399
Cdyl2	-1.69534	6.20234	-4.8939	0.00015797	0.00658109	1.07639		Gstt3	6.97859	-0.996171	5.26118	7.52405e-05	0.00313454	-1.53687		Rnf166	-0.867005	7.25887	-5.02349	0.000121383	0.00504492	1.20827
Dpp4	0.894142	7.22822	4.88737	0.000160089	0.006644	0.775508		Adamts14	-9.0428	0.275562	-5.24989	7.69578e-05	0.00318291	-1.41371		Cenpw	2.52083	4.06982	5.02277	0.000121559	0.00504492	0.591063
Abhd4	6.45168	2.9193	4.87716	0.000163462	0.0067583	-0.908304		Il7r	-1.37022	8.30133	-5.24894	7.71041e-05	0.00318291	1.62844		Cd164	-0.548823	9.33264	-5.00227	0.000126717	0.00523907	0.827793
Dnajc15	-1.07368	7.02958	-4.87226	0.000165106	0.00680049	0.980108		Atp1b1	-1.9494	5.48593	-5.24783	7.72763e-05	0.00318291	1.75532		Ccr9	-6.43264	2.3138	-4.99807	0.000127802	0.0052458	-0.711256
Atpif1	1.32733	6.11514	4.86264	0.000168384	0.00690945	1.027		Hsp90ab1	0.335481	10.432	5.22934	8.01873e-05	0.00328863	0.85503		Eya2	-1.93332	5.48325	-4.99792	0.000127841	0.0052458	1.20283
Mpp1	1.93771	5.79145	4.84726	0.000173762	0.00709927	1.00333		Klf2	-3.31993	6.95006	-5.22774	8.04457e-05	0.00328863	1.71733		Mcm2	0.942204	7.32831	4.99523	0.00012854	0.00525475	1.20059
Myb	5.95169	3.8693	4.84572	0.000174311	0.00709927	-0.42551		6330403K07Rik	2.22747	4.87376	5.22525	8.08476e-05	0.00329273	1.60724		Lpcat4	-0.959606	7.4235	-4.98505	0.000131222	0.00534437	1.16631
Spcs1	0.634176	7.89266	4.82422	0.000182149	0.00739093	0.577291		Ccna2	-2.00264	5.07571	-5.21827	8.19858e-05	0.00332667	1.6841		Klk1b27	6.40787	0.71695	4.98207	0.000132019	0.00534541	-2.48859
D930020B18Rik	6.39753	-1.68389	4.81317	0.000186319	0.00753211	-1.81063		Me2	-0.990334	7.7233	-5.2137	8.274e-05	0.00334484	1.50242		Itgb7	0.550828	9.52977	4.9813	0.000132227	0.00534541	0.631878
B2m	-0.430482	13.0163	-4.80924	0.000187826	0.00756502	-0.955023		Cd27	0.9098	8.54328	5.20825	8.36473e-05	0.00336904	1.28915		Prrt1	-3.65229	2.36593	-4.97312	0.000134442	0.00541488	-0.912686
Plekhg2	1.94296	6.20404	4.79918	0.000191738	0.00759762	0.892041		Kcnj8	-8.52282	0.728384	-5.2012	8.48378e-05	0.0033967	-1.48683		Il2rb	-0.642725	9.98557	-4.94929	0.000141114	0.00565786	0.44508
Chmp1b	-1.53284	6.49279	-4.7975	0.000192401	0.00759762	0.856762		Cks1b	-1.93937	5.74667	-5.20051	8.49564e-05	0.0033967	1.67475		Tnfsf14	-1.34187	6.47904	-4.94791	0.000141511	0.00565786	1.19108
Pfn1	0.321859	11.8323	4.79666	0.000192734	0.00759762	-0.493132		Gbp4	-1.07047	8.32966	-5.19785	8.54107e-05	0.0034024	1.38961		Klra3	2.88518	4.33514	4.94237	0.000143115	0.00570109	1.10194
Pde2a	-1.51094	7.45024	-4.79618	0.000192923	0.00759762	0.669678		Slc2a3	-1.93685	6.3335	-5.19594	8.57377e-05	0.00340301	1.66726		Slc16a5	7.00913	0.656349	4.93273	0.000145952	0.00578105	-2.356
Gbp7	-0.845603	7.49769	-4.7955	0.000193193	0.00759762	0.650793		Ndfip1	0.648869	8.77114	5.18825	8.70711e-05	0.00344341	1.20821		Coro1a	0.352535	11.2136	4.93196	0.000146181	0.00578105	0.159817
Slc2a3	-1.78692	6.3335	-4.79471	0.000193504	0.00759762	0.903548		Ust	-7.42935	0.907084	-5.17197	8.99641e-05	0.00354497	-1.54914		Adamts14	8.23	0.275562	4.92687	0.000147703	0.00582014	-2.13848
Ucp2	0.47776	10.5359	4.7947	0.000193508	0.00759762	-0.140607		Ptpn7	0.75087	9.34164	5.16264	9.16657e-05	0.00357867	1.03682		Ncapg	6.98316	3.47081	4.91964	0.000149895	0.00588527	-1.66672
Anxa5	1.75241	5.96421	4.78633	0.00019686	0.00770153	0.894011		Lrmp	0.752651	7.62089	5.16258	9.16774e-05	0.00357867	1.32441		X99384	5.73348	-1.64253	4.9166	0.000150825	0.00589173	-2.57035
Ptpn11	1.85355	5.30911	4.78406	0.00019778	0.00770722	0.889586		Lbh	1.15825	6.6958	5.16161	9.18559e-05	0.00357867	1.51705		Gzmb	6.88362	3.17219	4.91558	0.000151139	0.00589173	0.192009
Nt5e	1.04573	6.39371	4.78127	0.000198915	0.00770722	0.715773		Stk38	-1.10134	7.4593	-5.15973	9.22045e-05	0.00357867	1.41356		Pmf1	1.55126	5.65706	4.91067	0.000152662	0.0059299	1.09932
B3gnt2	1.10765	7.39575	4.78076	0.000199124	0.00770722	0.604018		Stat4	-0.688184	8.08813	-5.15836	9.24584e-05	0.00357867	1.31382		Tob1	-1.48268	5.55187	-4.90813	0.000153452	0.00593947	1.10097
Egr2	7.07569	3.63118	4.77719	0.000200589	0.00771429	-0.969224		Nrp2	-6.19157	-1.27283	-5.14407	9.5154e-05	0.00366999	-1.81016		Traf3ip2	-1.19433	6.43369	-4.90524	0.00015436	0.00595348	1.10752
Gpr97	-7.10025	-0.416723	-4.77687	0.00020072	0.00771429	-1.68832		Dnajc9	-0.989491	7.3194	-5.13315	9.7268e-05	0.00373831	1.37086		Sike1	1.54075	6.16799	4.90057	0.000155836	0.00598924	1.11016
Slc29a1	1.26614	6.81592	4.752	0.000211237	0.00809002	0.706894		X99384	-5.97825	-1.64253	-5.1265	9.85803e-05	0.00377545	-1.87785		Tmsb4x	0.290058	12.8612	4.89335	0.000158149	0.00605682	-0.502301
Nrn1	6.70617	-0.109833	4.74824	0.000212874	0.00812421	-1.5525		Fasl	-4.5928	5.71887	-5.11763	0.000100357	0.00382116	0.485835		Kdm5b	-1.57654	6.32457	-4.88521	0.000160799	0.00613619	1.08339
Aqp9	-8.94073	1.59873	-4.74373	0.000214859	0.00817137	-1.51378		Hsp90b1	-0.574594	9.13885	-5.1163	0.000100627	0.00382116	1.00933		Arpc5	0.543616	9.52754	4.88345	0.000161377	0.00613619	0.532108
Trip13	6.23915	1.90383	4.74197	0.000215639	0.00817256	-1.72521		Podnl1	1.5993	6.78144	5.11533	0.000100824	0.00382116	1.48467		9030619P08Rik	5.76656	-1.90622	4.88029	0.00016242	0.00613619	-2.64352
Soat2	-1.94189	4.78745	-4.7385	0.000217183	0.00820259	0.691494		Matk	1.86782	5.03624	5.10894	0.000102131	0.00385728	1.45724		Calm2	0.518411	9.64435	4.88014	0.00016247	0.00613619	0.484946
Il18rap	-8.77928	3.7665	-4.7364	0.000218124	0.00820973	-1.52376		Gramd3	-1.49475	7.7074	-5.10638	0.000102659	0.00386389	1.3683		Fyb	-0.586863	8.25874	-4.85965	0.000169414	0.00637639	0.796687
Fgfr1op	1.60463	5.37135	4.73381	0.000219287	0.00822516	0.796264		Pgcp	3.78415	3.94617	5.09969	0.000104053	0.00390288	0.470209		Spc24	3.17006	4.43069	4.85652	0.000170502	0.00637979	-0.00686632
Ezh2	1.23469	6.09897	4.72551	0.000223064	0.00833681	0.759873		Akap6	6.7118	-1.66613	5.09689	0.000104643	0.00391156	-1.8364		Cdca5	8.1938	2.0963	4.85603	0.000170673	0.00637979	-2.26619
Mei1	6.02004	-1.83377	4.72393	0.000223792	0.00833681	-1.94373		Rhpn1	-6.50572	-1.36831	-5.09459	0.000105129	0.00391631	-1.77899		Gp49a	6.97087	-0.0345339	4.85325	0.000171647	0.00639428	-2.34401
Grn	1.79431	5.7009	4.71111	0.000229775	0.00850857	0.741182		Arhgap26	-1.26919	6.95503	-5.09099	0.000105896	0.00393149	1.40343		Lax1	-0.912291	7.84597	-4.84797	0.000173509	0.00644169	0.859697
Lbr	-0.540075	9.26862	-4.71072	0.000229961	0.00850857	0.0955207		Pik3r5	-3.04203	5.67898	-5.08788	0.000106563	0.0039322	1.20092		Rnf114	-0.632181	8.06455	-4.84622	0.000174132	0.00644288	0.765388
Bhlhe40	-2.26359	6.17742	-4.70688	0.000231784	0.00854703	0.744962		Msn	-0.532334	9.90074	-5.08754	0.000106636	0.0039322	0.711464		Pydc4	-0.805935	7.11043	-4.84304	0.000175268	0.00646302	0.882076
Amica1	-6.58655	2.40377	-4.70304	0.000233625	0.0085859	-1.60577		Amica1	-7.06707	2.40377	-5.08316	0.000107583	0.00395375	-1.52474		Kif23	8.42449	2.58503	4.83731	0.000177335	0.00651721	-2.24129
Actg1	0.368119	11.9309	4.70001	0.000235086	0.00861062	-0.684966		Ltb	0.899852	9.62321	5.07732	0.000108859	0.00398723	0.866845		Kif2c	8.29385	1.40529	4.83171	0.000179379	0.00657019	-2.28167
Ostf1	-0.84187	7.72503	-4.69373	0.000238149	0.00867914	0.446255		Il18rap	-9.37285	3.7665	-5.06795	0.000110939	0.00404981	-1.48927		F2rl2	-1.66996	3.57785	-4.82764	0.000180881	0.00660308	0.932585
Bcl2a1b	0.678281	7.42519	4.69292	0.000238547	0.00867914	0.332163		Art2a-ps	2.32444	5.30017	5.06528	0.000111539	0.00405816	1.27827		Rad54l	6.60688	2.36408	4.82121	0.000183276	0.00666819	-2.12148
Tpi1	0.908435	7.68113	4.68963	0.00024017	0.00870915	0.398111		Tubb4b	-0.879159	8.03015	-5.04779	0.000115556	0.00419034	1.04418		Ndrg1	7.13074	1.41448	4.81828	0.00018438	0.00667363	-2.36071
B4galnt1	-0.424767	9.84247	-4.66959	0.000250305	0.00902918	-0.212386		Tpx2	-2.31852	4.44929	-5.02006	0.00012223	0.00441767	1.26425		Klhdc2	1.47746	6.07049	4.81749	0.000184677	0.00667363	0.954075
Pdk3	1.49737	5.901	4.66797	0.00025114	0.00902918	0.666441		Coro2a	-1.63878	6.15087	-5.0035	0.000126402	0.00454515	1.30412		Sh3bp1	1.13488	6.78941	4.81596	0.00018526	0.00667363	0.911759
Dera	1.75546	5.75258	4.66732	0.000251477	0.00902918	0.671457		Lax1	0.954109	7.84597	5.00045	0.000127187	0.00454515	1.05383		Zfp187	-0.857939	7.2197	-4.81427	0.0001859	0.00667465	0.85336
Enpp4	-2.51176	4.55493	-4.65929	0.000255683	0.00915011	0.49895		Sytl2	-1.76136	5.64414	-4.99998	0.000127307	0.00454515	1.25867		Panx1	-1.07071	6.78021	-4.81223	0.000186678	0.00668063	0.911084
Lysmd2	-1.92596	5.48515	-4.65747	0.000256645	0.00915452	0.642007		Ptma	-0.450367	10.117	-4.99953	0.000127423	0.00454515	0.494984		Tmem154	-1.12874	7.75269	-4.79965	0.000191554	0.00680919	0.762957
Rtn3	0.860478	7.05265	4.64706	0.000262223	0.00929215	0.414883		Trat1	-2.31915	5.37123	-4.98879	0.000130232	0.00463022	1.06221		Tppp3	5.92922	-1.86122	4.79941	0.000191648	0.00680919	-2.65837
Rasgrp1	-0.991129	7.89117	-4.64545	0.000263093	0.00929215	0.247995		Ntrk3	5.62784	2.04707	4.97874	0.000132915	0.00471027	-0.36527		Prdx6	-0.733955	8.27958	-4.79816	0.000192142	0.00680919	0.601683
Stx11	1.38754	5.86372	4.64485	0.000263419	0.00929215	0.619273		Phpt1	2.18477	5.80124	4.9771	0.000133358	0.00471069	1.22673		Cdkn3	5.97803	2.4846	4.79526	0.000193286	0.00682758	-1.79929
Ubash3b	1.26017	6.20566	4.64395	0.000263909	0.00929215	0.566806		Klra5	-7.8029	2.4711	-4.97448	0.000134072	0.00472062	-1.21992		E2f7	6.74011	1.13905	4.7912	0.000194904	0.00686252	-2.38356
Gata3	-0.842338	7.9489	-4.64101	0.000265517	0.00929346	0.198377		H2-DMb1	-6.99974	-0.555825	-4.97166	0.00013484	0.0047324	-1.77926		Rfc4	2.4164	4.86521	4.78482	0.00019747	0.0069305	0.507161
BC021614	1.08048	5.57166	4.64077	0.000265649	0.00929346	0.581916		Txndc5	-1.46513	6.87172	-4.96667	0.000136215	0.00475466	1.1484		Rab5b	-0.952937	6.8584	-4.77885	0.000199906	0.00697876	0.832747
Mbp	-1.00977	7.19556	-4.63811	0.000267112	0.00931479	0.409504		Ucp2	0.500129	10.5359	4.9662	0.000136345	0.00475466	0.287425		Pdk3	1.50681	5.901	4.77818	0.000200178	0.00697876	0.852517
Ffar2	-7.06145	-0.502293	-4.63499	0.000268839	0.00934517	-1.77093		Myb	2.28281	3.8693	4.95972	0.000138153	0.00478846	1.19476		Arhgap9	-0.638849	8.28105	-4.77676	0.000200763	0.00697876	0.579372
Akr1c13	-2.20003	4.80376	-4.62848	0.000272483	0.00944176	0.47611		Fchsd2	1.28996	5.84896	4.95958	0.000138192	0.00478846	1.22447		Atpif1	1.28934	6.11514	4.76961	0.000203733	0.00705951	0.857438
Rpl36a	-0.482283	8.63525	-4.62658	0.000273555	0.0094489	0.00196887		Ccdc28b	6.51641	2.33514	4.93251	0.000146016	0.00504357	-1.14585		Gpr15	6.59162	-1.25364	4.76081	0.000207449	0.00715226	-2.57733
Ccdc50	1.46762	5.71779	4.62503	0.000274436	0.00944942	0.591261		Golm1	-3.46056	5.41636	-4.91982	0.000149841	0.00515935	0.867092		Hexb	1.61214	5.83792	4.75868	0.000208358	0.00715226	0.844637
Ptprcap	0.489004	10.1081	4.62096	0.00027675	0.00949913	-0.369223		Il4	2.95393	5.10452	4.91664	0.000150815	0.00517655	0.61082		Rhpn1	6.07671	-1.36831	4.75864	0.000208376	0.00715226	-2.54266
Sytl2	-1.64053	5.64414	-4.61799	0.000278458	0.00951295	0.57376		Marcksl1	1.86052	4.39879	4.90312	0.00015503	0.00530454	1.10121		Cdc42ep4	6.75504	-0.0425394	4.7523	0.000211107	0.00722332	-2.41126
Adk	1.67448	5.72828	4.61723	0.000278895	0.00951295	0.5745		Gpc1	-3.14753	5.57856	-4.90109	0.000155673	0.00530989	0.742815		Rbbp7	0.92287	8.29416	4.74355	0.000214939	0.00733142	0.561373
Apol7b	-4.83521	2.37952	-4.61414	0.000280683	0.00954408	-0.992461		Isg20	2.70128	4.72893	4.89896	0.000156349	0.0053139	0.693581		Ccnf	6.06122	3.35177	4.73448	0.000218984	0.00744612	-1.59748
Gpr65	-1.56653	6.38092	-4.59212	0.00029377	0.00995808	0.464029		Ptpn6	0.586977	8.91421	4.89766	0.000156764	0.0053139	0.542775		Dera	1.755	5.75258	4.73138	0.000220386	0.00747053	0.720069
Ptger4	-1.94232	6.2706	-4.5879	0.000296346	0.0100143	0.495852		Eif4enif1	1.38748	6.1144	4.89459	0.000157748	0.00533071	1.03849		Bub1	6.83698	2.3382	4.7278	0.000222015	0.00750246	-1.97851
Runx3	-3.49181	5.42985	-4.58632	0.000297318	0.0100161	0.130209		D16Ertd472e	-1.64849	6.56599	-4.88812	0.000159845	0.0053849	1.08799		Kif20a	7.38645	2.76462	4.70792	0.000231288	0.00779169	-2.18014
Rasgef1a	7.67426	0.66842	4.58149	0.000300311	0.0100552	-1.73677		Cd226	-1.07831	8.25838	-4.86521	0.000167501	0.00562545	0.773327		Pglyrp2	-0.876015	7.43205	-4.70558	0.000232405	0.00780522	0.609575
Gm12250	-1.4067	6.40786	-4.58147	0.000300321	0.0100552	0.407075		Sla	-0.611589	8.75463	-4.86138	0.000168818	0.00563016	0.592919		Mt3	5.97152	-0.312306	4.70042	0.00023489	0.00786448	-2.67546
Pik3r1	-1.22502	6.33635	-4.57798	0.000302498	0.0100972	0.443078		A130040M12Rik	-1.07772	9.15781	-4.86105	0.000168931	0.00563016	0.514284		Klra14	6.16553	-0.972108	4.68942	0.000240273	0.00802011	-2.57427
Lrrc32	7.0972	0.0720896	4.57619	0.000303624	0.0101038	-1.78687		Icam1	-1.3932	7.15323	-4.86031	0.000169188	0.00563016	0.947397		Ckap2	7.85401	1.48579	4.68543	0.000242259	0.00803931	-2.38075
4930523C07Rik	-1.04125	6.72572	-4.56388	0.000311473	0.0103335	0.355816		H1f0	1.20463	6.38405	4.85758	0.000170135	0.00564445	0.999933		Uba7	-1.10709	7.58036	-4.68531	0.000242321	0.00803931	0.544792
Stat4	-0.613583	8.08813	-4.55799	0.000315295	0.0104286	0.0433133		Runx3	-3.68258	5.42985	-4.85069	0.000172547	0.00570712	0.422958		Casp4	6.76762	2.72151	4.68056	0.000244702	0.00809371	-2.30157
Map4k1	0.979592	7.40834	4.54914	0.000321141	0.0105899	0.136683		Vamp5	1.80797	4.91795	4.84653	0.000174022	0.00573853	0.924787		Epsti1	0.559813	7.63758	4.67691	0.000246552	0.00813025	0.434544
Smad7	-5.79907	1.95753	-4.54468	0.000324125	0.0106561	-1.73529		Tspan32	0.586131	8.82262	4.83812	0.000177042	0.00580422	0.48225		Iqgap1	0.689006	8.48023	4.67434	0.000247865	0.00814892	0.343672
Klrd1	-4.82482	6.46794	-4.54257	0.000325543	0.0106706	-0.0296294		D930020B18Rik	6.43055	-1.68389	4.83802	0.000177078	0.00580422	-1.99497		Ccl4	9.06139	0.815452	4.67217	0.000248976	0.0081504	-2.32113
Gstt2	1.7553	4.96387	4.53152	0.000333101	0.0108472	0.393471		Nop10	0.764843	7.9148	4.82883	0.00018044	0.00589673	0.672095		Cdca8	3.17166	5.22905	4.67134	0.000249403	0.0081504	0.26006
Coro2b	2.77282	4.00697	4.53131	0.000333244	0.0108472	0.373907		Pisd-ps1	0.9249	7.28285	4.82536	0.000181726	0.005921	0.786359		Tug1	-0.736879	7.86947	-4.66596	0.000252188	0.0082032	0.426385
Atp2b1	-0.80911	7.5039	-4.53034	0.000333914	0.0108472	0.0827888		Nhsl2	-7.70672	-0.371684	-4.82248	0.000182799	0.00593826	-1.79412		Fam189b	-0.74585	8.35988	-4.66532	0.000252522	0.0082032	0.338789
Scd2	1.67885	5.40581	4.52871	0.000335044	0.0108517	0.408164		Ccr5	-7.09	4.14887	-4.8161	0.000185207	0.00599732	-1.15164		Txn1	0.720835	7.986	4.66042	0.000255088	0.00826197	0.420709
Twsg1	2.22621	5.16355	4.51952	0.000341505	0.0110282	0.390077		Bcl6	4.42377	5.10595	4.81475	0.000185716	0.00599732	0.731838		Dbf4	5.35486	3.73542	4.65711	0.000256834	0.00827306	-1.34835
Parp3	1.39839	5.86256	4.51342	0.000345858	0.0111358	0.323569		Troap	-6.49126	-0.308992	-4.81174	0.000186867	0.00601668	-1.76389		Cenpm	6.53851	2.12042	4.65565	0.000257608	0.00827306	-2.28456
Anxa2	1.92148	7.78574	4.50957	0.000348635	0.0111922	0.219763		Ppia	-0.344271	11.6682	-4.80084	0.000191088	0.00613447	-0.396102		Klra5	4.93692	2.4711	4.65516	0.000257869	0.00827306	-0.893964
Cyp4f16	-5.88886	2.39217	-4.50589	0.000351313	0.0112451	-1.40907		Lag3	1.90726	3.4201	4.78858	0.000195953	0.00625358	0.894927		Aqp9	-6.62558	1.59873	-4.65405	0.000258462	0.00827306	-1.51465
Rpl5	-0.394948	11.1082	-4.50257	0.000353747	0.0112899	-0.888904		Nrn1	6.86712	-0.109833	4.78722	0.000196502	0.00625358	-1.77308		Rrad	-2.09457	5.41957	-4.65039	0.000260424	0.00830353	0.571768
Tgtp2	-0.942071	6.5126	-4.4939	0.000360179	0.0114617	0.198405		Dapk2	-5.82488	2.85159	-4.78718	0.000196517	0.00625358	-1.17914		Tasp1	-2.02699	5.70649	-4.64944	0.000260935	0.00830353	0.596821
Cyb5	0.974168	6.96656	4.49167	0.000361852	0.0114804	0.13835		Ndrg3	-1.46222	6.19413	-4.77732	0.000200533	0.00636285	0.854808		Bub1b	7.52003	3.36925	4.6445	0.000263613	0.00836435	-2.04112
Plscr1	2.43338	4.60874	4.48813	0.000364525	0.0114804	0.207412		Gars	-1.00163	6.81779	-4.77011	0.000203524	0.00642891	0.744745		Serpinb9	0.927515	7.09026	4.64214	0.000264901	0.00836632	0.453098
Traf3ip2	-1.14475	6.43369	-4.48675	0.000365571	0.0114804	0.196329		Nup210	-1.03589	8.08667	-4.76947	0.000203793	0.00642891	0.489757		Tnfrsf1a	-1.2678	6.3083	-4.64158	0.000265208	0.00836632	0.590033
Snn	6.23815	-0.890134	4.48417	0.000367542	0.0114804	-2.04274		Hexb	-1.8008	5.83792	-4.76587	0.000205304	0.0064579	0.854227		E2f8	7.17516	2.091	4.63798	0.000267185	0.00838358	-2.29909
Larp1b	6.93944	1.04586	4.48299	0.000368441	0.0114804	-1.74291		9030619P08Rik	-5.61509	-1.90622	-4.7521	0.000211194	0.00662408	-2.15253		G0s2	6.20051	-0.206071	4.63707	0.00026769	0.00838358	-2.17929
Rpa1	0.875971	7.86902	4.48259	0.000368748	0.0114804	-0.0731968		Mei1	6.05306	-1.83377	4.74984	0.000212177	0.00663586	-2.12116		Cnn2	0.446922	10.4699	4.6364	0.00026806	0.00838358	-0.210949
Jak1	-0.445638	9.28845	-4.48115	0.000369858	0.0114804	-0.393154		Ramp1	1.7357	6.70937	4.73914	0.000216895	0.00676403	0.78383		Grcc10	-0.760238	8.34201	-4.6333	0.000269783	0.00838958	0.330958
Ppm1j	-1.41216	6.27884	-4.48071	0.000370196	0.0114804	0.261791		Plp2	-1.35044	4.75117	-4.72308	0.000224182	0.0069621	0.77604		Tigit	5.69479	3.82858	4.63329	0.000269789	0.00838958	-2.02381
Cd5	0.95668	8.10777	4.48066	0.000370233	0.0114804	-0.159236		Dpysl2	-0.608179	8.38852	-4.72234	0.000224522	0.0069621	0.300582		Kcnab2	1.34922	6.9879	4.63135	0.000270872	0.00839934	0.510798
Rbms1	-1.23432	7.09203	-4.47038	0.000378239	0.0116709	0.125537		Txnip	-1.28941	7.94962	-4.71631	0.000227328	0.00702913	0.515745		Tmem64	-1.66076	5.80337	-4.62374	0.000275168	0.00850839	0.588882
Rbbp7	0.889505	8.29416	4.47003	0.000378517	0.0116709	-0.182138		Pebp1	0.683394	7.71972	4.71328	0.000228749	0.00704402	0.463325		Ccna2	5.9472	5.07571	4.62013	0.000277228	0.00854785	-0.870384
Icos	0.492644	8.5431	4.46333	0.000383834	0.0118015	-0.425851		Tnfrsf9	1.31156	6.99048	4.71254	0.0002291	0.00704402	0.55422		Dusp6	-1.00168	7.09472	-4.60586	0.000285533	0.00877912	0.474875
Litaf	2.00028	5.75359	4.45966	0.000386776	0.0118586	0.277605		Sike1	-1.61115	6.16799	-4.70192	0.000234163	0.00717948	0.703014		Lrrc58	0.786443	6.84701	4.6003	0.000288839	0.00884683	0.472915
Tob1	-1.41217	5.55187	-4.45482	0.000390689	0.011945	0.252136		2810417H13Rik	-2.13619	6.53645	-4.69386	0.000238088	0.00725589	0.56769		Cap1	0.491763	8.67236	4.59943	0.000289356	0.00884683	0.122327
Pqlc3	1.68545	5.98012	4.44591	0.000398007	0.0120656	0.224165		Ube2g2	-1.58967	6.83523	-4.69367	0.000238177	0.00725589	0.644341		Glrx	1.53395	7.35069	4.58592	0.000297569	0.00907254	0.44715
Cd44	0.601265	8.4617	4.44579	0.000398109	0.0120656	-0.358334		Tmem176b	-5.93955	3.07228	-4.69203	0.000238987	0.00725589	-1.57135		Cse1l	1.02499	7.06558	4.57956	0.000301512	0.00916713	0.420168
Trat1	-2.08246	5.37123	-4.44507	0.000398706	0.0120656	0.17814		Snx2	0.926436	7.36282	4.69136	0.000239315	0.00725589	0.474067		Spcs2	-0.445919	8.93112	-4.57791	0.000302544	0.00917295	0.02954
Trim59	1.76714	6.00332	4.44465	0.000399056	0.0120656	0.244339		Ldha	-0.422413	10.1176	-4.68871	0.000240624	0.00727538	-0.177378		Nedd4	-1.15236	5.59295	-4.57522	0.000304238	0.00918605	0.445423
6330403K07Rik	1.83183	4.87376	4.44144	0.000401735	0.0121083	0.23885		Ptk2b	0.846122	7.78005	4.68593	0.00024201	0.00729708	0.409503		Maml2	1.08974	6.02776	4.57455	0.000304659	0.00918605	0.495425
Mcm7	0.908058	7.01196	4.43932	0.000403516	0.0121083	0.060948		Palm	-6.38046	-0.480936	-4.6841	0.000242926	0.00729854	-1.8677		Hcst	-0.478501	8.74703	-4.57038	0.0003073	0.00924018	0.0334022
Gbp6	-1.03937	6.60114	-4.43732	0.000405197	0.0121083	0.0354626		Cd81	2.25736	5.78306	4.68316	0.000243396	0.00729854	0.701358		Lgals3bp	-0.562914	8.02893	-4.56344	0.000311754	0.00934833	0.199099
Bik	-5.98904	1.6779	-4.43668	0.00040574	0.0121083	-1.66623		Mboat7	1.25641	6.2177	4.67856	0.000245714	0.00734786	0.624934		2010317E24Rik	7.68252	1.29231	4.55447	0.000317611	0.00947316	-2.41793
Tmem175	1.47255	5.48228	4.43635	0.000406015	0.0121083	0.232539		Tppp3	-5.77775	-1.86122	-4.6768	0.000246607	0.00735332	-2.17544		Ehd4	5.59284	3.09928	4.5524	0.000318972	0.00947316	-1.96145
Fam84a	7.45323	0.471608	4.42519	0.000415574	0.0123244	-1.82509		Myo1h	6.49285	-1.34694	4.67512	0.000247466	0.00735332	-2.12995		Tpi1	0.867353	7.68113	4.55204	0.000319215	0.00947316	0.27912
Tmem64	-1.73975	5.80337	-4.4243	0.000416346	0.0123244	0.179109		Nek7	1.05741	7.35265	4.67423	0.000247918	0.00735332	0.414611		Pif1	7.151	-0.149213	4.55177	0.000319388	0.00947316	-2.49044
Ptpn2	-0.753602	7.46422	-4.42395	0.000416647	0.0123244	-0.137112		Klrc2	-7.27417	3.71288	-4.66369	0.000253372	0.00749474	-1.36051		Nup210	0.928129	8.08667	4.54958	0.000320848	0.00949066	0.13545
Ehd4	5.47188	3.09928	4.42265	0.00041778	0.0123245	-1.36217		Gm11346	-2.48931	4.89283	-4.66069	0.000254943	0.00751304	0.476285		Podnl1	-1.4196	6.78144	-4.54348	0.000324932	0.00958549	0.422053
Edaradd	-6.78346	2.42999	-4.40153	0.000436602	0.012845	-1.76068		Nrp1	1.09832	6.6039	4.65989	0.000255368	0.00751304	0.399837		Hn1	0.498814	9.08893	4.54161	0.000326197	0.00959687	-0.0549824
Il12rb1	-1.55059	6.49395	-4.39875	0.00043914	0.012885	0.0187601		Pdlim4	-7.85801	0.290201	-4.65057	0.000260329	0.00763842	-1.87808		Ccdc50	1.41955	5.71779	4.53357	0.000331687	0.00971558	0.377151
Samd3	-1.90272	6.03345	-4.39474	0.000442827	0.0129285	0.133883		Spcs1	0.607615	7.89266	4.64892	0.000261214	0.00764383	0.261752		Irf8	1.50663	6.01233	4.53309	0.000332012	0.00971558	0.411427
Kdm6b	1.07771	6.21439	4.39457	0.000442993	0.0129285	0.0743426		Smad7	-5.90104	1.95753	-4.64013	0.000266	0.00776306	-1.84458		Itk	-0.547409	8.69538	-4.529	0.000334846	0.0097723	-0.00753666
Ddx58	-0.664691	7.33283	-4.39058	0.000446689	0.0130016	-0.192306		Ccr3	-7.2976	-1.00525	-4.63867	0.000266806	0.00776582	-1.96472		Ubc	-0.457203	9.40027	-4.52759	0.000335826	0.00977476	-0.158857
2810474O19Rik	-0.689381	7.75794	-4.38015	0.000456529	0.0132356	-0.261607		Tprgl	-0.951609	7.83878	-4.63638	0.000268068	0.00778183	0.307227		Mccc2	-4.68686	2.94352	-4.52613	0.000336848	0.00977844	-1.75
Casp1	5.97727	4.12122	4.3794	0.000457241	0.0132356	-1.1397		Xcl1	-3.25356	5.64139	-4.63232	0.000270326	0.00782655	0.319305		Il18r1	-1.25526	4.7444	-4.5193	0.00034166	0.00985545	0.39072
Cd9	0.969437	6.48504	4.37823	0.000458366	0.0132356	-0.0733266		Cdca8	-1.85806	5.22905	-4.61712	0.000278962	0.0080552	0.565974		Lyn	6.48007	2.03238	4.51854	0.000342202	0.00985545	-2.3711
Tug1	-0.714337	7.86947	-4.36094	0.000475222	0.0136861	-0.369974		Inpp5b	0.957074	7.87658	4.60738	0.000284635	0.00819735	0.21028		Mtap4	1.29843	6.14144	4.51852	0.000342209	0.00985545	0.382501
Sdcbp2	4.24274	3.8179	4.34817	0.000488078	0.0140194	-0.682975		Adamts3	6.9481	-1.07221	4.59698	0.000290832	0.00835376	-2.09373		Ndufa11	0.633913	7.3955	4.51564	0.000344264	0.00988854	0.221407
Foxp3	8.62711	2.6676	4.34615	0.000490147	0.0140419	-1.87014		Rbms1	-1.26993	7.09203	-4.59368	0.000292825	0.00838893	0.412088		Cst7	1.03107	7.47177	4.50473	0.000352162	0.0100845	0.266429
Plxnc1	1.79027	4.79882	4.33874	0.000497801	0.0142026	0.0280005		Kit	-5.75611	-1.55385	-4.58487	0.000298216	0.00852101	-2.22136		Sytl3	1.92945	5.14212	4.50104	0.000354868	0.0100845	0.355671
Edem1	-1.06083	7.42606	-4.33713	0.000499482	0.0142026	-0.264081		Syt11	1.39005	5.49493	4.57243	0.000306	0.0087206	0.454469		Tox	1.90175	5.88661	4.50098	0.000354918	0.0100845	0.122453
2610307P16Rik	5.56467	-1.99667	4.33696	0.00049966	0.0142026	-2.26744		Btg1	0.916227	10.4131	4.56836	0.000308594	0.00877162	-0.449962		Gnal	-1.12241	5.41172	-4.5003	0.000355419	0.0100845	0.336918
Gna15	-2.39375	5.21463	-4.33368	0.000503097	0.0142631	-0.0411797		Tnfrsf8	5.75242	-1.21293	4.55708	0.000315893	0.00895576	-2.12167		Atxn7l3b	-1.1869	6.49931	-4.49991	0.000355707	0.0100845	0.334656
Rpl13a	-0.515731	10.4323	-4.32741	0.00050975	0.0144143	-1.07557		Tacc1	-0.962568	7.26227	-4.55535	0.000317029	0.00896468	0.268999		1190002F15Rik	3.24911	3.75309	4.49319	0.000360709	0.010184	-1.08058
Ptpn22	0.465316	8.76927	4.31993	0.000517787	0.0146037	-0.683995		Top2a	-2.23101	6.36931	-4.54923	0.000321077	0.00905569	0.259577		Ckap2l	6.54306	3.48929	4.4927	0.000361081	0.010184	-1.82379
Cd200	6.18662	4.06592	4.31829	0.000519573	0.0146163	-0.890277		Gabarapl2	-0.835437	8.37762	-4.54623	0.000323083	0.00908878	0.0209107		Gm12070	0.447566	9.65206	4.48256	0.000368775	0.0103742	-0.279799
Klk15	6.72251	-0.348446	4.31535	0.000522775	0.0146686	-2.14432		Elmo2	-1.2248	6.90199	-4.54296	0.000325284	0.0091272	0.278915		Ncapd2	2.45287	5.1353	4.47915	0.0003714	0.0104211	0.0435942
E030011O05Rik	-6.25716	-0.234535	-4.31004	0.000528626	0.0147702	-2.10572		Sardh	5.90575	0.93577	4.52667	0.000336472	0.00940599	-2.07459		Gnai2	0.565592	8.2407	4.47214	0.000376855	0.0105222	-0.024036
Lrp10	0.718937	8.5943	4.30869	0.000530116	0.0147702	-0.612066		Tubg2	7.9722	0.380318	4.52599	0.000336944	0.00940599	-2.0083		Notch1	1.06026	6.68871	4.47142	0.000377424	0.0105222	0.261126
Pik3r5	-2.60612	5.67898	-4.30838	0.000530456	0.0147702	-0.0761817		Zap70	0.570704	8.97868	4.52154	0.000340075	0.00946919	-0.225		Itm2a	2.40621	5.82241	4.47082	0.000377894	0.0105222	0.28205
Nav2	4.02529	3.51636	4.30715	0.000531831	0.0147708	-0.574185		Rcn1	-1.96169	5.25704	-4.50074	0.000355096	0.00986227	0.335708		Klra9	4.43436	2.7701	4.46871	0.000379558	0.0105417	-0.00810799
Tram1	-0.47138	9.31806	-4.30533	0.000533857	0.0147895	-0.81131		Ctsc	-1.31508	7.49742	-4.4971	0.000357787	0.00991179	0.0718561		Luc7l	-0.989226	6.24655	-4.46216	0.000384763	0.0106522	0.267312
Pde3b	-0.967031	6.53437	-4.30256	0.000536962	0.0148378	-0.255419		Ly6i	-5.00745	-0.422949	-4.49387	0.000360198	0.00994435	-1.97949		3110003A17Rik	0.706606	7.49143	4.46126	0.000385489	0.0106522	0.0897201
Map2k2	-0.870466	7.27395	-4.29796	0.000542163	0.0149437	-0.336349		Car2	-7.43627	0.72352	-4.49309	0.000360785	0.00994435	-1.91211		Gng11	6.67043	-0.811139	4.45985	0.000386618	0.0106564	-2.69193
Nek2	6.71628	2.40599	4.28974	0.000551577	0.0151649	-1.97024		Sdcbp2	2.54458	3.8179	4.4893	0.000363643	0.00999789	0.196721		Sec11c	-0.550421	8.1754	-4.45396	0.000391397	0.0107609	-0.0604824
Arhgap9	-0.58487	8.28105	-4.27205	0.000572418	0.0156799	-0.654899		Cyba	-0.620212	9.29562	-4.48433	0.000367419	0.0100763	-0.32239		Bcl2a1d	-1.21897	6.2228	-4.44972	0.000394864	0.010829	0.258658
Hmgb1	0.453034	9.98915	4.27141	0.000573182	0.0156799	-1.03372		Eea1	1.51434	4.59342	4.48107	0.000369919	0.0101195	0.318137		Casp1	6.0522	4.12122	4.44474	0.000398979	0.0108979	-1.76145
Sidt2	-0.734412	7.54947	-4.26898	0.000576115	0.0157207	-0.474882		Cd40lg	0.932751	7.64863	4.47952	0.000371116	0.0101268	0.000553456		Cd86	6.14344	1.03124	4.44427	0.000399374	0.0108979	-2.64928
Ms4a6b	-0.511936	9.64819	-4.26631	0.000579346	0.0157695	-0.989599		Pik3ap1	-7.44986	2.38611	-4.44409	0.00039952	0.0108747	-1.95393		A430084P05Rik	6.82613	0.14367	4.44199	0.000401277	0.0109225	-2.54359
Cblb	-1.55566	6.01814	-4.26497	0.000580979	0.0157746	-0.127653		Ncapg	-2.0321	3.47081	-4.44266	0.000400718	0.0108802	0.240902		Wdr1	0.37827	9.82938	4.43001	0.000411422	0.0111708	-0.478496
Ttn	6.93598	0.712826	4.26361	0.00058264	0.0157804	-1.95999		Sema4d	-0.734209	7.94262	-4.43708	0.000405405	0.0109801	-0.127457		Cisd3	1.21914	5.72094	4.42244	0.000417963	0.0113203	0.206621
Rap1b	-0.991308	9.36921	-4.26194	0.000584681	0.0157965	-0.799734		Psmb3	-0.547068	8.38755	-4.43165	0.000410014	0.0110775	-0.266548		Sept6	-0.541027	8.48018	-4.41904	0.000420941	0.0113404	-0.176429
Rrm1	1.66071	6.89244	4.25832	0.000589139	0.0158777	-0.222533		Klrc3	-6.29687	-0.480232	-4.42764	0.000413459	0.011143	-2.23204		Adam12	-5.59233	-1.24978	-4.41889	0.000421067	0.0113404	-2.72192
Klk1b8	6.31477	-0.685738	4.24491	0.000605953	0.0162906	-2.23958		Ifi203	-0.9492	7.22726	-4.42411	0.000416513	0.0111858	0.00346608		Lyl1	5.98318	1.71557	4.41804	0.000421822	0.0113404	-2.34564
Uba52	-0.418654	10.2782	-4.24027	0.000611874	0.0164093	-1.22313		Ubash3a	-1.1968	6.58104	-4.42312	0.000417372	0.0111858	0.107404		1810034E14Rik	6.60461	1.09927	4.41227	0.000426922	0.0114493	-2.60897
Ppp3cc	-1.18899	6.28061	-4.23445	0.000619403	0.0165698	-0.227252		Pde1b	-5.96206	-1.32574	-4.42226	0.000418122	0.0111858	-2.2751		Soat2	-1.37927	4.78745	-4.4053	0.00043318	0.011577	0.11495
Klf10	1.81695	6.29658	4.2333	0.000620892	0.0165698	-0.202995		Ccl4	-8.35154	0.815452	-4.41942	0.000420607	0.0112248	-1.86431		P2rx7	-1.48076	7.11831	-4.40445	0.000433949	0.011577	0.0982228
Gfod2	6.44583	-0.794403	4.21034	0.000651571	0.017341	-2.24987		Krtcap2	-0.72774	7.46212	-4.41105	0.000428015	0.0113242	-0.0849114		Clspn	5.46464	2.35424	4.40334	0.000434952	0.011577	-2.14838
Ttll9	5.11432	-2.17382	4.20932	0.000652969	0.017341	-2.41514		Mtpn	-0.89994	8.22468	-4.41017	0.000428801	0.0113242	-0.276088		1700026L06Rik	6.02967	-0.684671	4.40227	0.000435928	0.011577	-2.72864
H2afy	-0.828721	7.31155	-4.20432	0.000659862	0.0174815	-0.525994		Cd3e	0.451297	10.3704	4.41002	0.000428935	0.0113242	-0.802683		Tmpo	1.24318	6.79329	4.39819	0.000439651	0.0116475	0.0646816
Gimap3	-0.332791	10.8206	-4.2002	0.000665591	0.0175906	-1.4843		Evi2a	1.2732	5.96994	4.40828	0.000430497	0.0113242	0.160103		Psma1	0.619273	8.43113	4.39282	0.000444608	0.0117252	-0.219956
Lck	0.303967	10.7442	4.19886	0.000667475	0.0175978	-1.43928		Kif5b	-0.714965	7.48315	-4.40821	0.000430556	0.0113242	-0.129903		Adi1	-0.816873	6.9293	-4.39269	0.000444731	0.0117252	0.0444499
Mcm3	1.11092	6.97011	4.19605	0.000671428	0.0176594	-0.399823		Chsy1	-2.16609	5.88558	-4.40821	0.000430557	0.0113242	0.179087		Pbk	6.39214	3.02844	4.38278	0.00045403	0.0119415	-2.19026
Srsf3	0.463357	8.9227	4.19413	0.000674136	0.017688	-0.919256		Gpx8	-8.51477	-0.534805	-4.4054	0.000433091	0.0113365	-2.03075		Fmnl1	0.755975	8.01553	4.37509	0.000461376	0.0121056	-0.175895
Cd96	-0.882804	8.04017	-4.19191	0.000677301	0.0177284	-0.711999		Arl4c	-2.28302	5.64839	-4.40416	0.000434208	0.0113365	0.13876		Dtx4	-5.51345	2.51986	-4.3724	0.000463977	0.0121446	-2.06402
BC048355	6.24272	-0.648551	4.18462	0.00068775	0.0179588	-2.20603		BC013712	-7.43714	0.557902	-4.40342	0.000434878	0.0113365	-2.03217		Zfp512	-1.4641	5.73418	-4.36908	0.000467208	0.0121999	0.0991927
Gtf2i	0.701201	7.78553	4.17894	0.00069601	0.0181213	-0.716643		Trib2	-1.36165	5.8725	-4.40305	0.000435213	0.0113365	0.160907		Il10ra	3.72539	4.89341	4.36603	0.000470201	0.0122488	-0.640238
Rnf114	-0.55375	8.06455	-4.17706	0.000698776	0.0181213	-0.80643		Cenpa	-1.19945	5.88518	-4.40195	0.000436217	0.0113365	0.0546902		Gpsm2	7.74395	0.743354	4.36407	0.000472124	0.0122492	-2.55464
Egr1	1.88367	6.49319	4.17694	0.000698952	0.0181213	-0.35806		Tnfsf10	-1.69064	5.1393	-4.39603	0.000441639	0.0114501	0.13724		4833439L19Rik	1.1593	6.39124	4.36373	0.000472461	0.0122492	0.0791826
Nab1	2.17309	5.08069	4.17344	0.000704111	0.0182118	-0.304529		Zfp523	5.90603	2.61895	4.39472	0.000442851	0.0114543	-1.62014		Rpa1	0.839593	7.86902	4.36135	0.000474814	0.012281	-0.146381
Supt3h	2.53228	3.71867	4.16996	0.000709283	0.0183022	-0.514335		Abhd8	1.05031	7.17104	4.38731	0.000449751	0.0116053	-0.0814718		Eif5	-0.445811	8.70284	-4.35788	0.000478271	0.0123412	-0.366782
Rrad	-1.65646	5.41957	-4.16519	0.00071643	0.018443	-0.321816		Ptpn13	5.55234	3.35603	4.38087	0.000455847	0.0117348	-1.31102		Ska1	6.12235	0.696598	4.35129	0.000484904	0.0124829	-2.34442
Gm12253	-5.32347	-0.99266	-4.16147	0.000722072	0.0185445	-2.30596		Nhedc2	6.03438	-0.902838	4.36708	0.000469163	0.0120492	-2.1446		Car2	6.37097	0.72352	4.35	0.000486218	0.0124872	-2.20996
Hrh4	-7.40731	-0.104927	-4.15921	0.000725509	0.018589	-2.10526		Cd28	0.865322	8.41839	4.36498	0.000471231	0.0120739	-0.407704		Gabarapl1	4.89163	2.39058	4.34766	0.000488606	0.0125022	-2.20371
Pxmp2	6.33819	-0.02415	4.15708	0.000728773	0.0186289	-2.25491		2610307P16Rik	5.59769	-1.99667	4.3627	0.000473482	0.0121032	-2.42086		Chst2	1.28261	5.50823	4.34718	0.000489094	0.0125022	0.0537127
Mmp9	-9.15378	2.86097	-4.15315	0.000734823	0.0187397	-1.9999		Mpp1	1.56224	5.79145	4.35891	0.000477244	0.0121708	0.0353049		Tgtp2	-0.859311	6.5126	-4.3456	0.000490716	0.0125144	-0.00272616
Sypl	1.13223	6.07138	4.13318	0.000766357	0.0194983	-0.402553		Arxes2	5.79118	1.22955	4.35492	0.000481243	0.0122442	-2.12037		Slbp	0.586854	8.13777	4.34263	0.000493771	0.012563	-0.278495
St3gal1	2.2974	5.27153	4.12964	0.000772096	0.0195987	-0.355753		Ifng	-2.30389	5.39233	-4.34793	0.000488332	0.0123957	0.0305511		Sept11	0.917915	6.83219	4.33644	0.000500204	0.012697	-0.129443
Rad54l	5.81879	2.36408	4.12695	0.000776484	0.0196643	-1.9739		Klre1	-10.1198	4.42462	-4.34427	0.000492076	0.0124617	-1.77303		Ldlrap1	1.69708	5.16815	4.33246	0.000504386	0.0127735	-0.0617704
Stt3b	-1.07099	6.6421	-4.11575	0.00079501	0.0200175	-0.580866		Cd3d	0.503681	10.1571	4.33816	0.00049841	0.0125929	-0.873151		Itgb3	-2.23487	4.26576	-4.32695	0.000510241	0.0128919	-0.09718
Cks2	1.57373	6.00118	4.11544	0.00079553	0.0200175	-0.389549		1500011H22Rik	1.94848	4.84505	4.333	0.000503819	0.0126761	0.000215999		Asf1b	2.95546	5.75335	4.32444	0.000512926	0.0129298	-0.12828
Slc7a6	0.89509	6.74443	4.11466	0.000796837	0.0200175	-0.597925		F2r	-1.92266	6.93265	-4.33281	0.000504023	0.0126761	-0.0251873		Uba52	-0.414459	10.2782	-4.32169	0.000515882	0.0129743	-0.836096
Galnt10	-1.87265	6.37043	-4.11411	0.000797764	0.0200175	-0.425603		Gpi1	0.503144	8.7636	4.31903	0.000518766	0.0130169	-0.579034		Gata3	-0.743681	7.9489	-4.30453	0.000534751	0.0134179	-0.338308
Esco2	6.398	2.40163	4.1116	0.000802004	0.0200777	-2.08838		Il17rb	3.79028	4.73984	4.31532	0.000522814	0.0130883	-0.76818		Clic1	0.431238	9.13701	4.29794	0.000542189	0.0135445	-0.583766
Ctnnbip1	6.22274	0.449686	4.09963	0.000822481	0.0205058	-2.29116		Cct6a	-0.704824	7.2662	-4.31367	0.000524614	0.0131033	-0.240234		Fancd2	5.93989	1.06133	4.29786	0.000542274	0.0135445	-2.68024
Tuba1b	0.909735	9.13596	4.09941	0.000822862	0.0205058	-1.09767		Relb	1.3967	6.54661	4.31007	0.000528592	0.0131726	-0.0897527		Mgst2	-1.07504	5.79853	-4.2964	0.000543937	0.013555	-0.0331151
Hmgn3	5.35466	-0.874436	4.09678	0.000827436	0.0205728	-2.14523		Hs3st3b1	-5.75935	3.67105	-4.30586	0.000533264	0.0132587	-1.58439		Irgm1	-0.89117	7.69549	-4.29347	0.000547286	0.0136073	-0.276644
Cnbp	-0.315036	10.0541	-4.09439	0.00083161	0.020587	-1.46309		Arpc5	-0.491151	9.52754	-4.30314	0.000536314	0.0133042	-0.829838		Stx11	1.26758	5.86372	4.28654	0.000555298	0.0137624	-0.0533141
Smpdl3a	0.635398	8.66457	4.0943	0.000831778	0.020587	-1.16476		Klra14	-5.65391	-0.972108	-4.3003	0.000539518	0.0133534	-2.27624		Nrp1	1.84371	6.6039	4.2859	0.000556042	0.0137624	-0.0562301
Cited4	-5.74007	1.45722	-4.08985	0.000839621	0.0207341	-2.13193		Crybb1	-5.3761	-1.7148	-4.29426	0.000546389	0.0134928	-2.44375		Nrp2	5.14889	-1.27283	4.28419	0.000558038	0.0137805	-2.8136
Serpinb9	-1.16864	7.09026	-4.08871	0.000841638	0.020737	-0.613932		Baiap3	-1.43519	5.81708	-4.28881	0.000552661	0.0136169	-0.143121		Ccdc34	4.82596	2.52573	4.28065	0.000562194	0.0138518	-2.15962
Cd27	0.679544	8.54328	4.08734	0.000844063	0.0207389	-1.13347		Reep5	-0.846814	7.37238	-4.27875	0.000564431	0.0138756	-0.431493		Bub3	0.509957	8.10346	4.27879	0.000564384	0.0138744	-0.382261
Cenpe	5.97365	2.60243	4.08653	0.000845516	0.0207389	-2.10518		Ska1	-6.0158	0.696598	-4.27246	0.000571923	0.0140282	-1.89106		Depdc1b	6.5441	0.853505	4.27644	0.000567172	0.0139116	-2.56798
Tmem176a	-8.01498	1.33142	-4.08522	0.00084784	0.0207493	-2.11447		Nfkbia	0.735607	8.61099	4.26722	0.000578238	0.0141513	-0.622888		Acpp	-3.93701	3.31102	-4.27193	0.000572565	0.0139855	-1.48091
Rnh1	0.573847	7.50243	4.08383	0.000850342	0.0207639	-0.866175		Lass4	1.26146	6.24557	4.26354	0.000582722	0.0142291	-0.182282		Map2k3	0.840569	6.83613	4.27178	0.000572746	0.0139855	-0.156023
Ndrg1	6.32116	1.41448	4.08092	0.000855567	0.0208449	-2.25112		Xdh	-1.18908	6.55469	-4.26016	0.000586871	0.0142984	-0.298585		Malat1	-0.459345	12.8089	-4.25784	0.000589727	0.014368	-1.80412
Gabarapl1	4.66841	2.39058	4.07786	0.000861106	0.0209331	-1.81197		Cd200	2.56675	4.06592	4.25653	0.000591356	0.0143756	-0.11254		Il12rb1	-1.39461	6.49395	-4.25392	0.000594605	0.0144546	-0.181757
Cd86	5.80083	1.03124	4.07349	0.000869079	0.02108	-2.30748		Myl6	-0.374667	9.94321	-4.2551	0.00059313	0.0143867	-1.04324		Pold1	1.66266	5.37453	4.24847	0.000601443	0.0145883	-0.137944
Sept11	-1.27669	6.83219	-4.06931	0.000876773	0.0212195	-0.594866		Fgfr1op	1.42239	5.37135	4.25149	0.00059764	0.0144639	-0.125714		Rpl37a	-0.455589	10.1438	-4.23733	0.000615667	0.0148713	-0.964398
Fam26f	-1.99528	4.11356	-4.06682	0.00088139	0.021284	-0.640112		Armcx6	6.12208	-1.07581	4.24758	0.000602558	0.0145507	-2.42284		Dlgap5	2.63682	4.08646	4.23629	0.000617015	0.0148713	-0.666437
Itgb3	-3.68197	4.26576	-4.06283	0.000888841	0.0214166	-0.83506		Sytl3	-4.39427	5.14212	-4.24276	0.000608693	0.0146664	-0.515786		Cenpl	2.96861	4.3642	4.23615	0.000617195	0.0148713	-0.910054
Rpl32	-0.376025	10.4351	-4.06112	0.000892058	0.0214467	-1.63323		2310016M24Rik	0.800832	6.87237	4.2413	0.000610553	0.0146788	-0.327434		Ccdc47	-0.81437	6.82757	-4.23278	0.000621577	0.0149439	-0.252019
Xcr1	-4.80017	1.41804	-4.05608	0.00090158	0.021628	-1.79407		Tspan6	6.53214	-1.118	4.23777	0.000615092	0.0147304	-2.38038		Fignl1	7.29798	3.03417	4.22703	0.000629125	0.0150921	-2.37783
Prf1	-5.50809	4.97754	-4.05107	0.000911156	0.0218098	-1.3835		Spry1	5.89153	-0.78015	4.23723	0.000615798	0.0147304	-2.19658		A430078G23Rik	1.41589	5.09706	4.22535	0.000631349	0.0151122	-0.197216
Grhl1	6.41631	-1.04189	4.04937	0.000914444	0.0218406	-2.37689		Ttll9	5.14735	-2.17382	4.2365	0.000616745	0.0147304	-2.55916		Nop10	-0.662342	7.9148	-4.21718	0.000642278	0.0153326	-0.453619
Fam89a	5.65338	0.35747	4.04803	0.00091703	0.0218545	-2.40969		Cenpw	-2.33153	4.06982	-4.23069	0.00062431	0.0148785	-0.423264		Sept5	5.6314	-1.07723	4.21637	0.000643363	0.0153326	-2.90072
Prkd3	-1.62153	6.34251	-4.04436	0.000924151	0.0219763	-0.630914		Grn	1.49801	5.7009	4.2283	0.000627446	0.0149206	-0.208404		Zfp36	0.710934	6.88697	4.21132	0.000650222	0.0154622	-0.295698
Rapgef5	5.71881	-1.60235	4.04315	0.000926521	0.0219847	-2.4665		Ddx24	0.799973	7.76471	4.22235	0.000635336	0.0150318	-0.566288		Foxp3	8.35887	2.6676	4.20752	0.000655436	0.0155524	-2.63698
Usp3	-1.00217	6.30331	-4.0402	0.000932303	0.0220739	-0.634201		Cenpe	-2.24741	2.60243	-4.22178	0.000636098	0.0150318	-0.280977		Arf1	0.412005	9.43714	4.20186	0.000663277	0.0156852	-0.868957
Jarid2	1.62828	5.33969	4.03621	0.000940198	0.0221275	-0.556457		Fam105a	-0.745898	8.29264	-4.22127	0.000636774	0.0150318	-0.6256		Slmo2	0.99931	6.32082	4.20141	0.00066391	0.0156852	-0.236772
Il2ra	-1.50987	5.67911	-4.03611	0.000940389	0.0221275	-0.582771		Klri1	-6.71307	0.291968	-4.22063	0.000637631	0.0150318	-2.19753		Txndc5	1.06509	6.87172	4.20017	0.000665638	0.0156883	-0.371768
Ndrg2	6.09799	2.11627	4.0355	0.000941593	0.0221275	-1.96881		Sell	-3.31756	5.06671	-4.21722	0.000642219	0.0151074	-0.182438		Nr3c1	-0.807001	7.34749	-4.19926	0.000666915	0.0156883	-0.431943
Uhrf1bp1l	-0.932344	6.49902	-4.03496	0.000942675	0.0221275	-0.731566		Med30	-1.1853	6.05212	-4.2096	0.000652584	0.0152908	-0.244697		Enpp4	-1.85342	4.55493	-4.19468	0.000673358	0.0158058	-0.337141
Slc25a4	1.04858	6.85152	4.03382	0.000944955	0.0221334	-0.765367		Tuba1b	-0.748492	9.13596	-4.20943	0.000652819	0.0152908	-1.00747		Fam33a	1.51628	4.94527	4.19227	0.000676784	0.0158521	-0.356143
Sec14l1	3.15875	5.04564	4.02465	0.000963413	0.0224081	-0.583623		Nav2	3.55962	3.51636	4.18995	0.000680089	0.0158954	-0.692014		Tnfrsf18	-0.769408	7.99926	-4.18919	0.000681175	0.0159208	-0.531357
5730419I09Rik	1.28839	5.92535	4.02412	0.000964487	0.0224081	-0.642626		Coro2b	5.00008	4.00697	4.18759	0.000683477	0.0159405	-1.04799		Spc25	5.01702	4.38872	4.18046	0.000693789	0.0161536	-1.4517
Atp8b4	-2.0807	5.65102	-4.02295	0.000966884	0.0224081	-0.549567		Lta	2.69665	4.94245	4.18343	0.00068947	0.016046	-0.404401		F630043A04Rik	5.53617	2.65525	4.17853	0.00069661	0.0161536	-2.07128
Clp1	-1.0416	6.10872	-4.02237	0.000968055	0.0224081	-0.649589		Ckap2l	-2.37427	3.48929	-4.17829	0.000696962	0.0161858	-0.276005		Ifit1	-3.0526	4.93566	-4.17835	0.000696881	0.0161536	-0.545785
Rgs3	0.64421	7.53671	4.02212	0.000968573	0.0224081	-1.03891		F2rl2	-5.35875	3.57785	-4.17607	0.000700223	0.0161935	-1.80102		Rpl27a	-0.496061	9.88449	-4.17823	0.000697053	0.0161536	-1.01595
Erap1	-0.929844	7.42273	-4.02191	0.000968997	0.0224081	-0.934838		A730085K08Rik	6.03049	-1.08919	4.17521	0.000701492	0.0161935	-2.50352		Efnb1	-6.90297	-0.565493	-4.16561	0.000715806	0.0165378	-2.82841
Srxn1	6.15842	1.84647	4.01651	0.000980115	0.0226172	-2.13501		Nedd4	-2.98555	5.59295	-4.17504	0.000701743	0.0161935	-0.507735		Abcd1	2.08247	5.33027	4.16504	0.000716662	0.0165378	-0.352578
Tnfsf14	-1.09436	6.47904	-4.01173	0.000990069	0.0227987	-0.792811		Padi2	-2.8105	5.39392	-4.17219	0.00070597	0.0162567	-0.50559		Cd3g	-0.450543	10.0833	-4.16152	0.000721993	0.0166257	-1.07114
Ly6e	-0.314652	12.2152	-4.00334	0.00100776	0.023112	-2.45838		Tmem173	0.615972	8.56673	4.16949	0.000709981	0.0163146	-0.875991		Myo1e	1.62159	6.0676	4.15988	0.000724487	0.0166479	-0.292358
Bub1b	6.5641	3.36925	4.00249	0.00100956	0.023112	-1.90205		Nptn	-1.10636	6.77206	-4.16672	0.000714137	0.0163756	-0.423364		Herc3	-2.1606	4.81802	-4.15875	0.000726209	0.0166525	-0.380397
Abce1	-0.963949	6.75682	-4.00228	0.00101002	0.023112	-0.836374		Eif4a1	-0.558437	9.18152	-4.16335	0.000719221	0.0164254	-1.00913		Ncaph	5.02433	4.00273	4.15661	0.00072949	0.0166926	-1.49423
Klraq1	3.28396	3.48124	4.00062	0.00101356	0.0231445	-1.20701		P2rx7	1.43702	7.11831	4.16328	0.000719318	0.0164254	-0.479163		Zfp672	-1.26142	5.4247	-4.15455	0.000732657	0.01673	-0.309378
Dut	0.893867	6.4948	3.9977	0.00101985	0.0232393	-0.745832		Klra10	-6.22494	-0.771564	-4.16184	0.000721501	0.0164303	-2.43932		Elmo2	1.00774	6.90199	4.15102	0.000738112	0.0168194	-0.466388
Card6	-2.36781	4.62793	-3.99339	0.00102917	0.023383	-0.814218		Card6	-2.45807	4.62793	-4.16116	0.000722541	0.0164303	-0.61928		Stk38	0.814647	7.4593	4.1444	0.000748482	0.0170202	-0.580488
Rnf43	2.64167	3.75358	3.99281	0.00103044	0.023383	-0.762503		A430093F15Rik	1.13477	4.948	4.1569	0.000729049	0.016514	-0.351555		Il17ra	1.10547	6.51304	4.13605	0.000761745	0.0172858	-0.411039
Zc3h12d	3.1452	3.99547	3.98819	0.00104054	0.0235634	-0.933307		Oas1a	2.76191	4.92438	4.15676	0.000729251	0.016514	-0.462227		2810468N07Rik	6.31246	-0.967071	4.13163	0.000768874	0.0173415	-2.83709
Pdia3	-0.421861	9.72653	-3.98668	0.00104385	0.0235893	-1.60757		I730030J21Rik	1.46081	5.14092	4.15273	0.00073547	0.0166204	-0.304836		Klf10	1.75942	6.29658	4.13143	0.000769193	0.0173415	-0.345777
Cecr5	-1.19066	6.80094	-3.98037	0.00105788	0.0238569	-0.893498		Mndal	-1.00284	6.94149	-4.13619	0.000761527	0.0171685	-0.508177		Nrgn	5.17179	0.471392	4.13134	0.000769333	0.0173415	-2.99527
Bzw2	-0.632623	7.72376	-3.97869	0.00106163	0.0238922	-1.17174		Kif22	-1.39191	5.40346	-4.13535	0.000762871	0.0171685	-0.407441		Cdca3	4.92637	4.25238	4.13035	0.000770944	0.0173415	-1.47419
4930453N24Rik	-0.950736	6.16406	-3.96392	0.00109531	0.0245993	-0.779012		Foxp1	-0.712913	7.28571	-4.13347	0.000765888	0.017201	-0.645933		Fam89a	5.6852	0.35747	4.12919	0.000772832	0.0173415	-2.9289
Tjp2	5.66733	2.79759	3.96009	0.0011042	0.0247481	-1.84059		Foxn3	-1.02578	6.66286	-4.12432	0.000780792	0.0174997	-0.489362		Lat2	6.77831	2.35038	4.12863	0.000773734	0.0173415	-2.13486
Rap1a	0.582161	7.63142	3.95748	0.00111032	0.0247936	-1.13541		Eif4h	-0.623552	7.98237	-4.12321	0.000782617	0.0175046	-0.837852		Selplg	0.42008	9.64732	4.12326	0.000782537	0.0175029	-1.25674
Batf	0.939507	6.62799	3.9569	0.00111168	0.0247936	-0.937734		Gm6682	-0.819329	6.77723	-4.12109	0.00078613	0.0175473	-0.633766		Hpn	-5.36107	2.23318	-4.1176	0.000791921	0.0176765	-2.45862
Pla2g12a	5.11294	2.32894	3.95576	0.00111435	0.0247936	-1.78692		Snx5	-0.688947	7.85284	-4.11191	0.000801473	0.0178532	-0.809441		Il2ra	-1.43755	5.67911	-4.11474	0.000796718	0.0177473	-0.380317
Nr3c1	-0.792511	7.34749	-3.95535	0.00111531	0.0247936	-1.09331		Dlgap5	-2.39165	4.08646	-4.11013	0.000804494	0.017884	-0.542018		Ttc28	-3.586	2.77673	-4.11348	0.000798821	0.0177579	-2.00767
Cenpm	5.73174	2.12042	3.95378	0.00111904	0.0248259	-2.18843		Gp49a	-5.49799	-0.0345339	-4.10877	0.00080679	0.0178986	-2.10173		Itgax	8.91443	0.901609	4.1102	0.000804364	0.0178114	-2.57621
Fam189b	-0.637558	8.35988	-3.94904	0.0011303	0.0249849	-1.36019		Fam89b	-0.838544	6.79633	-4.10579	0.000811875	0.0179749	-0.589342		Eif4h	0.599345	7.98237	4.11013	0.000804489	0.0178114	-0.740895
Actn2	-2.55052	3.40994	-3.94884	0.00113079	0.0249849	-1.1096		Tmpo	-1.23094	6.79329	-4.1032	0.000816316	0.0180366	-0.610342		Btg1	-0.812514	10.4131	-4.10882	0.000806717	0.0178245	-1.25335
Cybb	6.19602	0.058273	3.94742	0.00113417	0.0250091	-2.3522		Hmmr	-1.95124	4.45688	-4.09738	0.000826396	0.018222	-0.41718		Gm13546	5.99081	-1.04532	4.10149	0.000819267	0.0180455	-2.96289
Il27ra	0.488134	8.81276	3.94318	0.0011444	0.0251637	-1.56436		Tespa1	0.843048	7.61186	4.09643	0.000828047	0.018222	-0.780605		Zfp318	6.69176	-0.0474478	4.10105	0.000820024	0.0180455	-2.84756
Ccr8	5.71837	2.77642	3.9422	0.00114678	0.0251637	-1.93345		Tmed2	-0.638208	9.08429	-4.09436	0.000831661	0.0182647	-1.12466		Mcm5	1.08622	6.81809	4.09931	0.00082304	0.0180573	-0.498635
Atp6ap2	0.607415	7.1936	3.94165	0.0011481	0.0251637	-1.12576		Plekho1	4.78806	0.667866	4.09287	0.000834288	0.0182857	-1.67772		Ly6g5b	-5.34244	2.68353	-4.09883	0.000823872	0.0180573	-1.82508
H2afz	0.847696	9.62935	3.93727	0.00115878	0.025347	-1.50393		Hmga2-ps1	-5.9246	-1.07717	-4.08824	0.000842459	0.0184277	-2.52062		Clic4	2.02606	4.03857	4.08823	0.000842489	0.0184284	-0.577053
Rabac1	-0.722288	7.41651	-3.92377	0.00119237	0.0259532	-1.17148		Stx6	0.927699	7.02215	4.08413	0.000849794	0.0185336	-0.711553		Cdyl2	-1.13248	6.20234	-4.07814	0.0008606	0.0187869	-0.523241
Itgb8	6.07946	-0.906884	3.92362	0.00119273	0.0259532	-2.50447		Vdac2	-0.608446	7.60668	-4.08363	0.000850694	0.0185336	-0.813516		Nab1	2.10371	5.08069	4.06758	0.00087997	0.0191714	-0.64829
Lztfl1	-4.49793	4.44673	-3.92327	0.00119363	0.0259532	-1.18449		Gm14718	2.59314	2.52321	4.07983	0.000857544	0.0186456	-0.641083		Ddx39	0.663721	8.01398	4.0637	0.0008872	0.0192835	-0.833699
Oaz2	0.76878	6.5523	3.92177	0.00119742	0.0259838	-0.985244		Art2b	1.10565	6.82092	4.07265	0.000870615	0.0188922	-0.595821		Gm12250	-1.12292	6.40786	-4.06293	0.000888647	0.0192835	-0.561846
Cdk2ap2	0.480107	9.23918	3.92035	0.00120103	0.0260103	-1.65998		Dusp10	1.18659	5.4779	4.07067	0.000874265	0.0189337	-0.470596		Ccr3	6.38709	-1.00525	4.05991	0.000894332	0.0193591	-2.82412
Ccni	1.13995	6.9224	3.91881	0.00120493	0.0260433	-1.02847		Nipal1	3.12128	4.05317	4.0689	0.000877531	0.0189668	-0.824625		Ercc6l	6.44222	1.4276	4.0592	0.000895679	0.0193591	-2.68936
Gab3	-1.76231	5.82607	-3.91699	0.00120959	0.0260658	-0.802915		Cercam	-4.19283	1.35775	-4.06285	0.000888797	0.019172	-1.9734		Hnrnpf	0.410363	10.2552	4.0529	0.000907662	0.0195511	-1.39946
Gnal	-0.977206	5.41172	-3.91654	0.00121075	0.0260658	-0.800976		Emb	-1.14348	7.35036	-4.06193	0.000890536	0.019172	-0.641113		Rbmxl1	0.976174	6.6819	4.05264	0.000908146	0.0195511	-0.590514
Fam117b	5.55354	2.65975	3.91229	0.00122169	0.0262057	-1.8062		Znrf3	-1.2797	5.90769	-4.0603	0.000893586	0.0191998	-0.4879		Nras	0.584451	7.60412	4.04902	0.000915122	0.0196625	-0.804795
Klf3	-1.26691	6.82021	-3.91214	0.00122205	0.0262057	-0.955821		Ccng1	0.620263	7.68998	4.05473	0.000904162	0.0193801	-0.94549		Klhl6	0.769983	7.53344	4.04611	0.000920757	0.0197447	-0.779964
Traf6	-1.29543	5.4217	-3.90546	0.00123946	0.026527	-0.781919		Traf1	0.775643	7.30139	4.05401	0.00090553	0.0193801	-0.823102		Dopey2	-0.888924	6.61549	-4.04461	0.000923662	0.0197504	-0.649301
Tubb5	0.494662	10.405	3.90192	0.00124879	0.0266743	-1.88156		Ncaph	-2.57368	4.00273	-4.05047	0.000912329	0.0194874	-0.52408		Brip1	2.7553	3.63858	4.04411	0.000924641	0.0197504	-1.36128
Samd9l	-1.089	6.8637	-3.90072	0.00125197	0.0266791	-1.02859		Myc	-1.6241	6.4931	-4.04555	0.000921834	0.0196468	-0.589606		Chmp1a	-0.761319	7.94691	-4.03749	0.000937652	0.0199892	-0.858716
Cdc20	1.80531	5.69747	3.89998	0.00125391	0.0266791	-0.786121		Tank	1.17993	6.05382	4.04475	0.00092339	0.0196468	-0.588785		Plac8	-1.35844	6.2496	-4.03502	0.000942557	0.0200546	-0.658871
Nde1	0.802502	6.88884	3.89828	0.00125844	0.0267235	-1.10014		Dusp5	-2.1118	5.36359	-4.04251	0.000927779	0.0196587	-0.53911		Ildr1	6.80507	0.246285	4.03337	0.000945843	0.0200854	-2.82914
Gpm6b	4.2156	1.09651	3.8954	0.00126614	0.0268347	-1.36517		Pif1	-6.24279	-0.149213	-4.04193	0.000928915	0.0196587	-2.27944		Cobll1	2.28342	3.86953	4.03213	0.000948319	0.0200988	-1.00475
Kif20a	6.23784	2.76462	3.89154	0.00127652	0.0270023	-2.16176		Gnb1	-0.555843	8.33248	-4.0417	0.000929353	0.0196587	-1.07301		Anln	6.06037	1.98867	4.03096	0.000950668	0.0201096	-2.42484
Akirin1	-0.678889	7.16006	-3.88834	0.0012852	0.0271334	-1.14116		Pkm2	0.307012	9.76613	4.03972	0.000933247	0.0197029	-1.43586		Cenpf	3.23833	3.95433	4.02786	0.000956906	0.0201788	-1.30411
Cdk5r1	5.60755	-1.08116	3.88115	0.00130489	0.027496	-2.51084		Slc5a3	2.9722	3.41773	4.02869	0.000955233	0.0201281	-1.03748		Tle3	1.49191	5.93739	4.0275	0.000957639	0.0201788	-0.541457
Cdc40	-1.30363	6.10999	-3.87976	0.00130876	0.0275244	-0.911528		Rtkn2	-5.037	-1.02218	-4.02758	0.000957483	0.0201367	-2.65851		Fen1	1.4668	5.80899	4.02497	0.00096276	0.0202476	-0.552305
Ly6g5b	-4.90589	2.68353	-3.87476	0.00132269	0.0277637	-1.4766		Clic4	-3.18378	4.03857	-4.02382	0.000965116	0.0202581	-0.988566		Fxyd5	0.692418	9.49234	4.01937	0.000974225	0.0204494	-1.2463
Armc7	-1.06974	6.46142	-3.86414	0.00135277	0.0283406	-1.02766		Fam134b	1.2545	5.81594	4.02116	0.000970541	0.0203329	-0.595462		Kit	5.04273	-1.55385	4.01664	0.000979848	0.0205279	-3.01557
Atrn	-1.31104	6.17327	-3.86297	0.00135613	0.0283565	-0.990228		Ptpn11	1.35349	5.30911	4.01975	0.000973425	0.0203543	-0.585621		Mctp1	-6.2116	0.570861	-4.01343	0.000986505	0.0206278	-2.90688
Sub1	-0.454487	9.29196	-3.85747	0.00137199	0.0286334	-1.75055		Scd2	1.28446	5.40581	4.01747	0.000978135	0.0204137	-0.601306		Haus6	1.4959	4.94951	4.01042	0.000992804	0.0207198	-0.625904
1500011H22Rik	1.50224	4.84505	3.85626	0.00137552	0.0286522	-0.876071		Sidt1	-1.14266	6.52879	-4.01633	0.000980486	0.0204237	-0.714282		Art2a-ps	-1.88077	5.30017	-4.00855	0.000996732	0.0207621	-0.688675
Zfp655	-0.94386	6.20314	-3.85319	0.00138448	0.028784	-1.01809		Smc4	-0.931578	7.76078	-4.01428	0.000984753	0.0204373	-1.06979		Uhrf1bp1l	-0.86553	6.49902	-4.00667	0.0010007	0.0207773	-0.681382
St13	0.847371	7.09279	3.84498	0.00140878	0.0292335	-1.25233		Sh3gl3	6.29117	1.17164	4.01421	0.000984886	0.0204373	-2.37676		Lig1	4.67458	4.79117	4.0064	0.00100127	0.0207773	-1.4776
Pip4k2a	0.937917	5.89187	3.8428	0.00141531	0.0293001	-1.0232		Plxnc1	1.43192	4.79882	4.0089	0.000995997	0.0206287	-0.576078		Ppia	0.27203	11.6682	4.0021	0.0010104	0.0209271	-1.95049
Pik3ip1	-1.76209	5.64028	-3.84211	0.00141736	0.0293001	-0.901352		Rnase4	5.2061	3.46924	4.00769	0.000998542	0.0206335	-1.66746		Thumpd1	-0.940752	6.48928	-3.99897	0.0010171	0.0210065	-0.680848
Rilpl1	5.59581	-0.843261	3.84096	0.00142083	0.0293055	-2.5205		4930523C07Rik	-0.929033	6.72572	-4.007	0.00100001	0.0206335	-0.727855		Larp7	0.988984	6.1566	3.99851	0.00101809	0.0210065	-0.623184
Rrm2	1.12311	7.2153	3.84024	0.00142299	0.0293055	-1.13786		Sirt7	0.570472	8.0969	4.00288	0.00100874	0.0207742	-1.10219		Tnfsf10	1.23032	5.1393	3.99176	0.00103272	0.0212682	-0.608446
Btla	0.909019	6.47859	3.8381	0.00142945	0.0293831	-1.23158		Atg3	-0.816371	6.88636	-3.99899	0.00101707	0.0209064	-0.832469		Serp2	5.621	-1.20722	3.98953	0.0010376	0.0213284	-3.02363
Renbp	6.55653	-0.644888	3.83648	0.00143436	0.0294286	-2.52312		Ube2v1	0.549537	8.55271	3.99002	0.00103651	0.021266	-1.24386		Oip5	6.00432	1.64266	3.98068	0.00105718	0.0216836	-2.71477
Irak3	-5.81598	-0.0800817	-3.83305	0.00144483	0.0295879	-2.34156		Nebl	-4.73638	2.68427	-3.98019	0.00105828	0.0216719	-1.67389		Ank	5.3564	2.43787	3.97993	0.00105885	0.0216836	-2.41929
Arl4c	-2.0234	5.64839	-3.82964	0.0014553	0.0297248	-0.912522		Ccnf	-2.16966	3.35177	-3.9792	0.00106049	0.0216765	-0.657661		Nat10	-1.41653	5.85788	-3.97721	0.00106497	0.0217679	-0.636941
Atcay	5.54381	0.191738	3.8291	0.00145696	0.0297248	-2.21474		Slc22a15	4.43915	2.0307	3.97253	0.00107556	0.0219434	-1.93118		Il2	6.17476	-0.691656	3.97632	0.00106696	0.0217679	-2.90116
Slc27a6	-6.08737	2.33007	-3.82341	0.00147465	0.0299809	-1.91578		Spc24	-1.5291	4.43069	-3.97104	0.00107894	0.0219713	-0.647354		Osbpl3	1.21592	5.8719	3.97348	0.00107339	0.0218583	-0.661169
Pold4	1.24748	5.5321	3.82307	0.00147571	0.0299809	-0.965457		Mef2a	-1.54925	5.48887	-3.96871	0.00108426	0.0220385	-0.651952		Fam169b	1.89351	4.44783	3.96431	0.00109441	0.0222448	-0.90705
Klrc2	-6.01717	3.71288	-3.82186	0.0014795	0.0299809	-2.0103		Klri2	-7.65216	2.41682	-3.95787	0.00110939	0.0225074	-2.3481		Tcf19	2.77783	4.91258	3.96218	0.00109934	0.0223035	-1.00374
Tyms	1.23172	5.82559	3.82154	0.0014805	0.0299809	-0.96578		Peli1	-0.643475	7.52661	-3.95547	0.00111504	0.0225801	-1.0423		H2afv	0.822818	7.59054	3.95801	0.00110907	0.0224296	-0.936401
Prkch	0.855853	7.97708	3.81925	0.00148771	0.0300711	-1.52795		Arf1	-0.400117	9.43714	-3.95301	0.00112085	0.0226557	-1.54038		Ccnb1	4.90012	4.75197	3.95776	0.00110967	0.0224296	-1.69063
Ccdc109b	6.28878	0.534626	3.81445	0.0015029	0.0302679	-2.47292		Acss2	-1.95577	5.92125	-3.95057	0.00112666	0.022731	-0.695488		Lag3	5.52337	3.4201	3.95137	0.00112475	0.0226925	-2.49959
Gm4814	5.06185	1.16718	3.81442	0.001503	0.0302679	-1.99064		Metrnl	-7.19753	1.28436	-3.94957	0.00112905	0.0227373	-2.34988		AB124611	1.54581	5.83924	3.94947	0.00112927	0.0227417	-0.692038
Ccr7	1.89276	6.3399	3.80779	0.00152426	0.0306396	-1.01663		Gna15	-2.18197	5.21463	-3.94673	0.00113584	0.0228319	-0.752211		Ncoa3	-0.569846	7.46081	-3.94232	0.00114647	0.0230456	-0.96517
Pfkp	0.719148	8.41023	3.80614	0.0015296	0.030674	-1.625		Cdc42ep4	-5.21516	-0.0425394	-3.94504	0.00113991	0.0228715	-2.24795		Mmp9	-2.46909	2.86097	-3.94063	0.00115059	0.0230858	-0.735261
Ehd3	1.04242	7.33641	3.80553	0.00153159	0.030674	-1.40267		Add3	-1.08269	7.23581	-3.93399	0.00116687	0.0233695	-1.03699		Dnajc3	-0.687137	8.16466	-3.93845	0.00115589	0.0231463	-1.12684
Cd164	-0.421356	9.33264	-3.80059	0.0015477	0.0309398	-1.90909		Itgax	-8.71891	0.901609	-3.92198	0.00119689	0.0239267	-2.31574		Relb	-1.27246	6.54661	-3.93766	0.00115784	0.0231463	-0.754711
Nop14	-1.38754	5.34026	-3.79951	0.00155125	0.030954	-0.993966		Parp3	1.22487	5.86256	3.91877	0.00120505	0.0240459	-0.832161		Rnaseh2b	1.24332	5.32354	3.92977	0.00117733	0.0234928	-0.726029
Il12rb2	-2.78203	5.69198	-3.79308	0.00157254	0.0313216	-0.985748		Plekho2	-0.705756	7.12056	-3.91743	0.00120846	0.0240699	-1.0453		Cep55	5.78509	2.49684	3.92622	0.00118619	0.0236263	-2.49692
Tmco6	2.86852	4.56715	3.78609	0.00159602	0.0317315	-1.14874		Cyb5r3	0.911379	6.9236	3.91517	0.00121426	0.0241122	-1.00248		Ctso	-1.08808	6.37168	-3.9221	0.00119659	0.0237691	-0.809565
Sec11c	-0.476175	8.1754	-3.78231	0.00160885	0.0318936	-1.65965		Tmem37	-6.72388	1.69732	-3.91485	0.00121507	0.0241122	-2.32335		Dbi	0.722069	6.82642	3.92165	0.00119771	0.0237691	-0.87015
Sat1	0.606701	7.85686	3.78197	0.00161002	0.0318936	-1.55813		Acvrl1	-5.92039	-0.99069	-3.91402	0.00121721	0.0241122	-2.62893		Ndc80	4.73866	4.02064	3.91948	0.00120323	0.0238352	-1.6317
Bub3	0.463249	8.10346	3.78068	0.0016144	0.0319225	-1.60712		Mbp	-0.869712	7.19556	-3.9119	0.00122269	0.0241531	-1.02376		Mad2l1	3.03725	5.34863	3.91775	0.00120763	0.0238792	-0.898874
Gipc1	1.0486	5.66007	3.77884	0.00162073	0.0319399	-1.10291		B3gnt2	0.865305	7.39575	3.91085	0.0012254	0.0241531	-1.18247		Ctsa	0.49758	8.50778	3.91041	0.00122653	0.024209	-1.25478
Lass4	1.02928	6.24557	3.77872	0.00162114	0.0319399	-1.25112		Dennd4a	-1.93463	5.11756	-3.91065	0.00122591	0.0241531	-0.799371		Wee1	4.97969	2.83498	3.90764	0.00123376	0.0243078	-2.40829
Zfp961	-2.24948	4.92487	-3.77744	0.00162556	0.0319693	-1.04914		Cst7	0.696603	7.47177	3.90247	0.00124732	0.0245307	-1.27567		Vps4b	-0.748213	7.39423	-3.90454	0.00124188	0.0244236	-1.0219
Myo1h	5.23214	-1.34694	3.77656	0.00162859	0.0319714	-2.5771		Ikzf1	-0.614519	8.44724	-3.89931	0.0012557	0.0246278	-1.38898		Antxr2	-1.1779	6.33479	-3.901	0.00125123	0.0245632	-0.841989
Slc5a3	2.48252	3.41773	3.77294	0.00164111	0.0321593	-1.20314		Tmed5	-0.697421	7.37578	-3.8981	0.00125893	0.0246278	-1.15267		Far1	1.62021	5.93569	3.89821	0.00125863	0.0246642	-0.789004
Ltb	-0.54103	9.62321	-3.7659	0.0016658	0.0325748	-2.13674		Tnfrsf18	0.732864	7.99926	3.89806	0.00125903	0.0246278	-1.26858		Cenpk	5.05378	2.68138	3.89505	0.00126706	0.0247848	-2.25316
H2-DMa	1.31959	5.71014	3.7652	0.00166828	0.0325748	-1.11295		Itga2	-7.87005	1.59374	-3.89599	0.00126455	0.0246916	-2.36955		Apol7b	-2.94314	2.37952	-3.89411	0.00126959	0.0247899	-1.61821
Kcnip3	-6.1266	-1.0252	-3.75667	0.00169872	0.0331098	-2.5563		Edaradd	-6.08789	2.42999	-3.89424	0.00126924	0.0247225	-2.37199		Dtl	6.25828	3.33104	3.89047	0.0012794	0.0248866	-2.43118
Abhd16a	-1.22138	6.59108	-3.75218	0.00171497	0.033367	-1.31173		Cyfip1	1.22172	5.07319	3.89371	0.00127067	0.0247225	-0.815394		Pdia3	-0.398947	9.72653	-3.88964	0.00128167	0.0248866	-1.60253
Fcrl1	4.66229	2.4767	3.75133	0.00171807	0.0333679	-1.89269		Anxa1	-10.3813	2.90785	-3.89084	0.00127842	0.0248291	-2.37968		2700094K13Rik	0.88667	6.36713	3.8891	0.00128313	0.0248866	-0.883469
Pbk	5.56771	3.02844	3.74829	0.00172918	0.033524	-2.14626		Atp8b4	-2.01375	5.65102	-3.88727	0.0012881	0.0249727	-0.804808		Plk4	3.99665	4.19112	3.8889	0.00128366	0.0248866	-1.67318
1300014I06Rik	-6.99488	0.58159	-3.73868	0.00176477	0.0341533	-2.40274		Mthfs	1.03226	5.9099	3.87257	0.00132883	0.0256735	-0.901654		Cdc25c	6.50352	-0.00628531	3.8875	0.00128749	0.0249165	-2.86185
Dynlt3	1.71015	5.05906	3.73604	0.00177466	0.0342311	-1.13567		Fam84a	5.63216	0.471608	3.87252	0.00132895	0.0256735	-2.10019		Prim1	1.16215	5.67939	3.88612	0.00129124	0.0249449	-0.814231
Ctsl	-4.12029	2.42888	-3.73594	0.00177506	0.0342311	-1.9299		Ube2d3	-0.318165	9.70687	-3.87064	0.00133427	0.0257306	-1.77447		Smu1	0.563897	7.78936	3.88525	0.00129364	0.0249472	-1.16047
Ipo4	1.56611	4.72626	3.73437	0.00178097	0.0342844	-1.0911		Herpud1	-0.857132	7.79384	-3.86491	0.00135056	0.0259621	-1.25521		Gars	0.749939	6.81779	3.88043	0.0013069	0.0251584	-0.99609
Ifi203	-0.807856	7.22726	-3.72955	0.00179925	0.0345755	-1.4671		Twf2	-0.746486	7.38936	-3.86474	0.00135103	0.0259621	-1.21993		Gcnt2	-4.37012	0.19414	-3.87641	0.00131806	0.0253286	-2.38213
Naa40	1.47914	6.14416	3.72761	0.00180667	0.034657	-1.24019		Skp1a	0.522154	8.79226	3.85889	0.00136788	0.0262397	-1.57823		Whsc1	1.54798	5.17124	3.87462	0.00132307	0.0253802	-0.839357
Igtp	-0.569803	8.33979	-3.72429	0.00181944	0.0348407	-1.81435		Bcl2	-1.36206	6.6337	-3.85317	0.00138456	0.0265131	-1.00886		Ube2t	2.65754	3.5159	3.87304	0.00132751	0.0254207	-1.61119
Arhgap26	-0.949335	6.95503	-3.71571	0.00185286	0.0354185	-1.40116		Prex1	-1.24677	7.68228	-3.84936	0.00139578	0.0266811	-1.25656		Adprh	0.797036	6.93481	3.87131	0.00133237	0.0254691	-1.01851
St6galnac1	6.56826	-0.680573	3.71403	0.00185946	0.0354826	-2.61651		Arsb	-1.11732	7.09983	-3.84544	0.00140741	0.0268565	-1.14252		Lair1	7.13339	0.562342	3.86688	0.00134492	0.025664	-2.86993
Appl2	-1.71384	4.63247	-3.70831	0.00188218	0.0358534	-1.14714		Pacsin1	2.18637	5.04592	3.84207	0.00141748	0.0270014	-0.912759		Kif18b	5.37614	1.19179	3.86258	0.00135725	0.0258533	-2.62309
Tmem173	0.539425	8.56673	3.70636	0.00188997	0.035939	-1.92144		Satb1	-1.60806	7.03139	-3.83897	0.00142683	0.0271321	-1.00715		Slc12a3	-5.27301	-1.34368	-3.86123	0.00136113	0.0258533	-3.103
Ccdc34	4.30519	2.52573	3.70364	0.0019009	0.036084	-2.14003		Pppde1	1.30753	6.13152	3.83744	0.00143147	0.027173	-1.03397		Kif18a	6.56667	1.34495	3.86077	0.00136246	0.0258533	-2.8891
Alcam	5.70376	0.816553	3.70223	0.0019066	0.0361092	-2.57645		H2-K1	-0.222548	12.4694	-3.83486	0.00143929	0.0272741	-2.69514		Faah	-0.907183	7.17087	-3.86012	0.00136431	0.0258533	-1.05315
Rnf216	5.0218	2.66889	3.70168	0.00190884	0.0361092	-2.0441		Clpb	1.30152	5.2242	3.83306	0.00144481	0.0273311	-0.915227		Flii	0.707393	7.03602	3.85899	0.0013676	0.0258621	-1.05221
Ccdc28b	3.01962	2.33514	3.69708	0.00192755	0.0363616	-1.39792		Ehbp1l1	-0.95555	6.26405	-3.83141	0.00144985	0.0273656	-1.05416		Rap1gap2	5.86147	1.44643	3.85832	0.00136952	0.0258621	-2.52066
Pptc7	1.90229	5.01042	3.69676	0.00192885	0.0363616	-1.16751		Kcnab2	-1.14207	6.9879	-3.83083	0.00145165	0.0273656	-1.22724		Atg4b	-1.06062	6.00601	-3.85624	0.00137559	0.0259319	-0.89518
Foxn3	-0.928675	6.66286	-3.69494	0.00193632	0.0364172	-1.39525		Atcay	5.73877	0.191738	3.82487	0.00147009	0.0276391	-2.43584		Crybb1	4.82573	-1.7148	3.85464	0.00138025	0.0259464	-3.13145
2010300C02Rik	-6.31979	1.38661	-3.69442	0.00193847	0.0364172	-2.2384		Il18r1	-3.11275	4.7444	-3.82451	0.00147122	0.0276391	-1.40901		Themis	-0.797361	7.35019	-3.85426	0.00138135	0.0259464	-1.10563
Gabarap	0.390132	8.61776	3.69162	0.00194998	0.0365706	-1.94613		BC035044	-4.39848	3.55578	-3.82332	0.00147493	0.0276613	-1.6244		Tbc1d4	-1.65726	6.1522	-3.85353	0.00138349	0.0259464	-0.878135
Actb	0.147318	14.4046	3.68916	0.00196022	0.0366995	-3.8521		S100a13	-0.745657	7.06632	-3.8221	0.00147874	0.0276851	-1.25863		Cdc42se1	0.704819	8.53587	3.85083	0.00139144	0.0260507	-1.38043
Rps19	-0.446748	10.4275	-3.68381	0.00198259	0.0370548	-2.43603		Il2	-5.93265	-0.691656	-3.82041	0.00148405	0.0277126	-2.57915		Ms4a6b	-0.441838	9.64819	-3.84525	0.00140796	0.0263149	-1.68221
Pik3ap1	-6.28008	2.38611	-3.67596	0.00201587	0.0376124	-2.46517		Chpt1	-5.70284	1.57917	-3.82002	0.00148528	0.0277126	-2.45056		Snx11	1.92153	4.92094	3.84429	0.00141083	0.0263235	-0.938627
Tmem71	-1.13604	6.91898	-3.67478	0.0020209	0.0376419	-1.42901		Topbp1	-1.35488	5.6715	-3.81842	0.00149031	0.0277589	-0.97478		Hsd17b7	6.44314	-0.0499976	3.83413	0.00144154	0.0268096	-2.96655
Snai3	-3.95899	3.44406	-3.67266	0.00203001	0.0377338	-1.66112		Sfxn5	5.50395	-0.659237	3.8164	0.0014967	0.0278305	-2.7836		Memo1	1.28323	5.75994	3.83244	0.00144669	0.0268096	-0.909942
Rhog	0.462261	8.55131	3.67203	0.00203275	0.0377338	-1.97569		Klf3	-1.24174	6.82021	-3.81372	0.00150522	0.0279414	-1.11353		A430093F15Rik	2.40048	4.948	3.83231	0.00144709	0.0268096	-1.35369
Ifitm3	-5.54675	1.17395	-3.66992	0.00204186	0.0378385	-2.51678		Gpr15	-5.27919	-1.25364	-3.8129	0.00150786	0.0279427	-2.64983		Igfbp4	2.05636	4.36525	3.83195	0.00144822	0.0268096	-0.908768
C1qb	5.63488	1.23166	3.6679	0.00205065	0.037937	-2.53619		Flna	-0.772546	8.09594	-3.80399	0.00153659	0.0284265	-1.59352		Tor1aip1	-0.989023	6.68299	-3.83034	0.00145315	0.0268096	-1.03808
Gadd45b	1.48117	5.0556	3.66655	0.0020565	0.0379808	-1.22818		Gm2a	-0.923302	7.34158	-3.8032	0.00153917	0.0284265	-1.31868		C330027C09Rik	6.73757	1.51766	3.82987	0.0014546	0.0268096	-2.75632
Bid	1.27829	5.88956	3.66436	0.0020661	0.038059	-1.33201		Slc9a3r1	-0.508228	7.98817	-3.796	0.00156282	0.028747	-1.50853		Oas1a	-2.56473	4.92438	-3.82963	0.00145533	0.0268096	-1.18164
S1pr5	-6.89754	2.84822	-3.66358	0.00206949	0.038059	-2.52616		Pmf1	-1.11748	5.65706	-3.79519	0.00156553	0.028747	-1.06282		Llgl1	1.69035	4.90979	3.82875	0.00145807	0.0268096	-0.971282
Lipt1	6.19162	0.587232	3.6632	0.00207119	0.038059	-2.57193		Nrarp	-5.78295	1.15214	-3.79484	0.00156667	0.028747	-2.35269		Stt3b	-0.893247	6.6421	-3.82777	0.00146108	0.0268096	-1.07712
Ankrd46	1.70132	5.50059	3.66234	0.00207498	0.0380645	-1.28546		Ifi27l1	0.751295	7.35424	3.79473	0.00156706	0.028747	-1.38077		Aim1	1.14354	6.05401	3.82765	0.00146145	0.0268096	-1.03503
Uap1l1	1.35813	5.84806	3.65571	0.00210437	0.0385219	-1.36902		A430084P05Rik	-5.3368	0.14367	-3.79189	0.00157651	0.0288718	-2.3218		Gpr174	0.899945	6.5795	3.82458	0.00147099	0.0269073	-1.01564
Myc	-1.48037	6.4931	-3.65512	0.00210697	0.0385219	-1.40349		Cxcl10	4.52294	2.99241	3.78972	0.00158379	0.0289211	-1.72877		Inpp4b	-0.836368	7.94665	-3.82412	0.00147243	0.0269073	-1.24121
Sytl1	-1.68062	5.28795	-3.65253	0.00211859	0.0386696	-1.24322		Galnt10	-1.7357	6.37043	-3.7895	0.0015845	0.0289211	-1.04121		Fyn	0.864457	7.01281	3.82356	0.00147417	0.0269073	-1.05858
Snx2	0.690262	7.36282	3.64647	0.00214603	0.0390605	-1.77323		Supt3h	2.26319	3.71867	3.78819	0.00158894	0.0289536	-1.17004		Tmem59	-0.686477	8.23557	-3.82159	0.00148033	0.0269507	-1.36578
Nub1	-0.758467	7.0697	-3.64622	0.00214717	0.0390605	-1.63046		1110051M20Rik	4.42539	2.61782	3.78616	0.00159579	0.02903	-2.00068		Rfc5	1.51388	6.25815	3.82103	0.0014821	0.0269507	-0.987182
Sbk2	5.74306	-0.256839	3.64431	0.00215587	0.0391535	-2.59955		Bphl	2.24764	4.69147	3.77797	0.0016237	0.0294887	-1.12946		Dpp4	-0.899554	7.22822	-3.82012	0.00148496	0.0269507	-1.07398
Klri2	-7.07854	2.41682	-3.64102	0.00217095	0.0393619	-2.48696		Tcn2	1.93716	5.17394	3.77711	0.00162667	0.0294935	-1.01701		2610318N02Rik	5.09683	1.81198	3.81962	0.00148652	0.0269507	-2.63469
Eya2	-1.24956	5.48325	-3.6365	0.00219187	0.0396141	-1.38425		Prkx	-1.31169	6.07407	-3.77414	0.00163694	0.029622	-1.04308		Rnf113a2	-1.57994	4.71382	-3.81887	0.0014889	0.0269507	-1.03433
Pter	5.62992	-0.642554	3.63645	0.00219212	0.0396141	-2.72846		Kcnn4	0.630088	7.48841	3.77278	0.00164168	0.029622	-1.49337		Trp53	-0.465828	8.16042	-3.81585	0.00149847	0.0270792	-1.3694
Cmtm6	-0.548779	7.96566	-3.63188	0.00221346	0.0399338	-1.94693		Tmem42	2.11892	4.38259	3.77272	0.0016419	0.029622	-1.1482		Gpx8	7.32048	-0.534805	3.81414	0.0015039	0.0271324	-2.88153
Nipal1	1.91897	4.05317	3.62169	0.00226182	0.040739	-1.29997		Akirin1	-0.659372	7.16006	-3.77085	0.00164841	0.0296904	-1.3353		Mxd3	4.41356	3.28694	3.80908	0.0015201	0.0273794	-2.11367
Cenpa	1.64859	5.88518	3.61892	0.00227519	0.0409123	-1.32379		Il10ra	-1.45367	4.89341	-3.76726	0.00166102	0.0298392	-1.10768		Osbpl5	1.3948	5.29737	3.80818	0.001523	0.0273863	-0.952624
Zfp36l2	-1.20249	7.37937	-3.61753	0.00228191	0.0409656	-1.77116		Lat2	-5.28066	2.35038	-3.76694	0.00166214	0.0298392	-1.73657		Car5b	3.50996	3.50101	3.80631	0.00152907	0.0274126	-1.64404
Adamts3	5.38609	-1.07221	3.61596	0.0022895	0.0410337	-2.62105		Ggt7	6.11752	0.395879	3.76565	0.0016667	0.029872	-2.5779		Slc9a9	-1.14962	6.96167	-3.80592	0.00153031	0.0274126	-1.02789
I730030J21Rik	1.12052	5.14092	3.6151	0.00229371	0.0410337	-1.38101		Tnip2	2.40832	3.8839	3.7645	0.00167076	0.0298956	-1.31915		Nudt16	-1.12067	5.43874	-3.80541	0.00153199	0.0274126	-0.958436
Tacc1	-0.772954	7.26227	-3.61379	0.00230008	0.0410337	-1.70706		Lnpep	-1.05709	6.5268	-3.76329	0.00167505	0.0299233	-1.23246		Ddx60	-3.3763	4.38018	-3.80335	0.00153867	0.0274694	-1.47912
Tmem2	2.61912	3.85513	3.61281	0.00230487	0.0410337	-1.48368		Maged2	5.13604	2.53963	3.76204	0.00167948	0.0299535	-2.08165		Hook2	-5.55895	1.19563	-3.8019	0.00154342	0.0274694	-2.93662
Baiap2	1.98907	4.77388	3.61275	0.00230516	0.0410337	-1.32319		Kif2c	-4.37972	1.40529	-3.76051	0.00168495	0.0299908	-1.72639		Gpi1	-0.436082	8.7636	-3.80104	0.00154624	0.0274694	-1.51357
Irf7	-0.859136	6.71697	-3.61212	0.00230826	0.0410337	-1.68133		Kif23	-2.10643	2.58503	-3.75992	0.00168707	0.0299908	-1.04578		Dzip1	-2.8458	4.08081	-3.80047	0.00154809	0.0274694	-1.49983
Dkc1	-0.825221	6.86335	-3.60909	0.00232312	0.0412205	-1.66578		Sdhaf1	1.37203	5.69114	3.75504	0.0017046	0.0302532	-1.074		Zfp870	-5.00002	3.67144	-3.80035	0.00154851	0.0274694	-2.2014
Prg4	5.64299	-0.660903	3.60844	0.00232633	0.0412205	-2.78392		Klrb1a	-5.42542	1.87517	-3.74764	0.00173155	0.0306816	-2.0926		Myadm	6.98438	1.58779	3.79902	0.00155286	0.0274694	-2.4665
Rasgrp2	-1.39946	6.05251	-3.60729	0.00233202	0.0412322	-1.35277		Igfbp4	-5.44741	4.36525	-3.74359	0.0017465	0.0308964	-1.64422		Ncapd3	1.07297	6.04568	3.79836	0.00155505	0.0274694	-1.02904
Rab4a	-4.32668	3.53627	-3.60648	0.00233605	0.0412322	-1.82746		Btf3l4	1.03526	6.48355	3.74217	0.00175175	0.030939	-1.28099		Bcl2l1	-1.04722	6.46657	-3.79828	0.0015553	0.0274694	-1.07205
Sema4d	-0.602026	7.94262	-3.60602	0.00233832	0.0412322	-1.90587		Haao	-5.99265	0.484668	-3.73959	0.00176138	0.0310482	-2.59373		L1cam	5.66037	2.01053	3.79495	0.00156633	0.0276195	-2.49957
Oas3	-1.79218	5.4249	-3.6031	0.00235284	0.0414214	-1.3602		Tmem14a	4.8016	1.29788	3.73899	0.00176362	0.0310482	-2.43914		Prelid1	0.502556	7.96326	3.79373	0.00157036	0.0276459	-1.38517
Ifi35	-0.613066	6.84654	-3.60021	0.00236732	0.0416092	-1.69714		Rorc	-6.58225	1.19971	-3.73773	0.00176832	0.0310808	-2.69852		Foxm1	6.96542	1.14373	3.78878	0.00158692	0.0278599	-2.92494
Akr1c12	-4.41817	1.17854	-3.59919	0.00237243	0.0416319	-2.41578		Arhgap19	-3.1261	1.90508	-3.73675	0.00177202	0.0310958	-1.43738		H2-DMb1	4.86092	-0.555825	3.78734	0.00159179	0.0278599	-2.80764
Padi4	3.63053	1.55472	3.59794	0.00237871	0.0416518	-2.09022		Camk2d	0.643345	6.59718	3.73396	0.00178253	0.0312301	-1.36363		Rps7	-0.363544	10.4022	-3.78687	0.00159339	0.0278599	-1.99905
Il18bp	-6.01492	0.503849	-3.59671	0.00238493	0.0416518	-2.60775		Gpd1l	-1.57658	5.15652	-3.73018	0.00179686	0.0314307	-1.09806		Egr2	5.68472	3.63118	3.78574	0.0015972	0.0278599	-2.53217
Cd93	-4.4392	1.79262	-3.59589	0.00238913	0.0416518	-2.26097		Hibadh	1.17683	5.84293	3.72799	0.00180522	0.0315263	-1.18044		Ralgps2	-2.56586	4.3506	-3.78559	0.0015977	0.0278599	-1.37055
Plekhf1	-5.91107	3.44187	-3.59532	0.00239201	0.0416518	-2.15356		5033414D02Rik	0.950509	6.49558	3.72369	0.00182178	0.0317648	-1.32478		Rpl13	-0.300978	11.2919	-3.78535	0.00159853	0.0278599	-2.26901
Krtcap2	-0.600223	7.46212	-3.59519	0.00239264	0.0416518	-1.81599		Zfp692	1.68077	4.58202	3.72248	0.00182644	0.0317952	-1.14756		Ddit3	-1.34437	5.03179	-3.7848	0.00160038	0.0278599	-1.01704
2610020H08Rik	-2.18578	4.45653	-3.59351	0.00240122	0.0416976	-1.45113		B4galt7	-1.51961	4.97031	-3.71792	0.0018442	0.0319912	-1.12124		Tk1	2.75676	5.00288	3.7831	0.00160615	0.0279158	-1.2145
A630001G21Rik	1.4062	5.10629	3.59283	0.00240466	0.0416976	-1.38153		2810474O19Rik	-0.593241	7.75794	-3.71782	0.00184458	0.0319912	-1.57907		Fbxo27	-2.63522	3.81518	-3.78143	0.00161185	0.0279704	-1.37644
Impdh1	-0.808094	6.3622	-3.59218	0.00240798	0.0416976	-1.60783		2810468N07Rik	-5.67949	-0.967071	-3.71733	0.00184649	0.0319912	-2.67673		Cfl1	0.299446	11.5131	3.77823	0.00162283	0.0281009	-2.38412
Fam108a	-1.08495	5.68618	-3.59117	0.00241316	0.0416976	-1.44146		Dock5	-4.34548	4.47862	-3.71534	0.00185431	0.0320758	-1.58228		Usp37	1.159	6.12301	3.77774	0.00162452	0.0281009	-1.05285
Rhoq	-5.21214	1.35358	-3.59093	0.00241438	0.0416976	-2.53846		Sh3bgrl3	-0.398405	10.8239	-3.71247	0.00186564	0.0322032	-2.42033		Tmco6	2.85049	4.56715	3.77271	0.00164194	0.0283572	-1.4497
Sgk3	-2.23331	4.52948	-3.58895	0.00242455	0.0418072	-1.38019		Wdr31	-5.58301	-0.927398	-3.71198	0.00186758	0.0322032	-2.80493		Sell	5.04586	5.06671	3.76879	0.00165563	0.0285486	-1.36824
Rnf32	5.60099	-0.752959	3.58504	0.00244476	0.0420892	-2.76926		Cd200r4	-6.1461	3.35699	-3.70755	0.00188522	0.0324562	-2.09004		Irak3	-5.58991	-0.0800817	-3.76404	0.00167238	0.0287919	-2.89826
Anxa7	1.34135	5.50858	3.5834	0.00245324	0.0421687	-1.44511		Klra9	-10.4445	2.7701	-3.70576	0.00189237	0.032528	-2.5251		Lztfl1	-1.73308	4.44673	-3.76097	0.0016833	0.028919	-1.0419
Wfs1	5.89692	0.159353	3.58262	0.00245731	0.0421722	-2.61563		Pola1	-1.37873	4.88963	-3.70461	0.00189699	0.0325561	-1.16317		Slc25a4	0.964773	6.85152	3.76048	0.00168507	0.028919	-1.17342
1700019G17Rik	5.22596	2.26209	3.58175	0.00246187	0.0421842	-2.30113		Decr2	1.68723	5.11653	3.69888	0.00192021	0.0327823	-1.15736		Cbx3	0.437636	8.85548	3.75495	0.00170493	0.0291903	-1.64543
Samd10	1.52647	5.72659	3.57633	0.00249032	0.0426048	-1.47535		Klra3	-5.66883	4.33514	-3.69758	0.0019255	0.0327823	-1.74449		E330016A19Rik	2.24304	3.56139	3.75459	0.00170622	0.0291903	-1.47102
Gm3002	4.90981	1.10047	3.57443	0.00250039	0.0427087	-2.43018		Pik3r1	-1.00918	6.33635	-3.69752	0.00192577	0.0327823	-1.28038		E2f2	6.08532	2.034	3.75216	0.00171505	0.0292955	-2.45992
Igsf3	-4.27908	1.76946	-3.57371	0.00250422	0.0427087	-2.45726		Evl	0.627825	7.30612	3.69743	0.00192613	0.0327823	-1.54344		Rap2a	5.68761	-0.940265	3.74592	0.00173789	0.0295718	-3.13492
Irf1	-0.498452	8.78784	-3.57264	0.00250992	0.0427391	-2.23771		Ndc80	-2.65186	4.02064	-3.69703	0.00192777	0.0327823	-1.17574		Pold3	2.03572	5.38012	3.74493	0.00174152	0.0295718	-1.09921
Abcd1	1.85308	5.33027	3.57168	0.00251501	0.0427592	-1.40043		Mrpl33	-0.670064	6.96043	-3.69692	0.0019282	0.0327823	-1.48765		Vkorc1	-1.39923	4.88644	-3.7448	0.00174201	0.0295718	-1.12312
Lyn	5.354	2.03238	3.5709	0.00251917	0.0427632	-2.55727		B4galnt4	5.73904	0.45877	3.69542	0.00193435	0.0328358	-2.60995		Fam26f	-1.44581	4.11356	-3.74479	0.00174207	0.0295718	-1.18436
Hivep2	1.22378	5.30968	3.56111	0.00257207	0.0435365	-1.48466		Tm6sf1	-1.40823	5.41704	-3.69226	0.00194736	0.0329166	-1.21563		Igtp	-0.553482	8.33979	-3.73862	0.00176498	0.029901	-1.59003
Dusp5	-1.88826	5.36359	-3.56099	0.0025727	0.0435365	-1.41103		Osgin1	4.65776	2.65479	3.69158	0.00195015	0.0329166	-2.23778		Mastl	5.56376	1.46858	3.7381	0.00176694	0.029901	-2.75762
Fignl1	6.26563	3.03417	3.55992	0.00257855	0.0435679	-2.39587		Itm2c	1.10589	7.27228	3.69158	0.00195016	0.0329166	-1.52969		Ptpn2	-0.597722	7.46422	-3.73333	0.00178492	0.0301585	-1.42147
Anxa1	-9.51622	2.90785	-3.553	0.00261667	0.0441437	-2.54391		Gzmb	-11.3971	3.17219	-3.69134	0.00195117	0.0329166	-2.52356		Golm1	1.27897	5.41636	3.7322	0.0017892	0.0301842	-1.16206
Tuba4a	-0.650448	7.40225	-3.5479	0.00264517	0.0445138	-1.92922		Dnase2a	2.67998	3.58142	3.67763	0.00200874	0.0338355	-1.48898		Tk2	-0.88513	6.5562	-3.72563	0.00181431	0.0305604	-1.23321
Plcxd2	-1.16736	5.54011	-3.54761	0.00264677	0.0445138	-1.49413		Tmsb4x	-0.224148	12.8612	-3.67231	0.00203152	0.0341293	-3.25376		Fchsd2	-0.986223	5.84896	-3.72441	0.00181898	0.030577	-1.11502
Carm1	3.76671	2.13671	3.54405	0.00266686	0.0447827	-2.18856		Lta4h	-0.748541	7.83561	-3.6721	0.00203244	0.0341293	-1.69819		Slc25a5	0.337193	10.0683	3.72392	0.00182089	0.030577	-2.03924
Stmn1	1.50423	7.15937	3.54262	0.00267494	0.0448494	-1.66936		Arhgdia	-0.371828	9.27351	-3.67079	0.00203808	0.0341616	-2.09344		Hint2	-1.32705	5.4432	-3.72301	0.0018244	0.0305888	-1.11254
Dbf4	4.20047	3.73542	3.53944	0.00269306	0.0450839	-2.01249		Ikbke	1.00964	6.95717	3.66928	0.00204465	0.0341616	-1.52892		Uqcrfs1	0.609496	7.30818	3.72212	0.00182784	0.0305996	-1.39431
D030056L22Rik	-1.19859	5.32661	-3.53762	0.00270349	0.0451843	-1.51815		Cdca3	-1.87197	4.25238	-3.66916	0.00204514	0.0341616	-1.23081		S100a13	0.700273	7.06632	3.7205	0.00183413	0.03064	-1.35612
Me2	-0.687504	7.7233	-3.5368	0.00270821	0.0451843	-1.98025		Creld1	6.23028	-0.808931	3.66876	0.00204688	0.0341616	-2.82298		St6galnac3	-2.55984	5.19636	-3.72005	0.00183587	0.03064	-1.23814
1500004A13Rik	5.11251	0.622316	3.53606	0.00271241	0.0451843	-2.58561		Plcg2	-6.94076	2.16973	-3.66675	0.00205566	0.0342557	-2.18324		Osgin1	-4.61328	2.65479	-3.71696	0.00184795	0.0307634	-2.57575
Dhrs1	1.5143	5.61132	3.53551	0.00271561	0.0451843	-1.52423		Myadm	-7.04952	1.58779	-3.65564	0.00210468	0.0349148	-2.29464		Actn1	4.52195	3.56045	3.71672	0.00184891	0.0307634	-2.23069
Arg1	-5.72051	0.544493	-3.53218	0.00273483	0.0454347	-2.53695		Ptger4	-1.59282	6.2706	-3.6549	0.00210799	0.0349148	-1.31321		Hace1	1.61735	5.31839	3.71236	0.00186607	0.0310017	-1.13385
Bambi-ps1	5.46379	0.623825	3.53005	0.00274724	0.0455495	-2.71244		A430078G23Rik	-1.24287	5.09706	-3.65473	0.00210872	0.0349148	-1.25528		Sdf4	-0.691183	8.59534	-3.71115	0.00187086	0.0310341	-1.65373
Notch1	0.87318	6.68871	3.52938	0.00275115	0.0455495	-1.75615		Rap1gap2	-5.1524	1.44643	-3.65426	0.00211082	0.0349148	-2.1507		Ctsc	0.971428	7.49742	3.7095	0.00187742	0.0310854	-1.49554
Pde7a	-1.69133	4.56784	-3.52885	0.00275425	0.0455495	-1.4793		Ubtd2	5.7658	-0.345623	3.65418	0.0021112	0.0349148	-2.75176		Litaf	1.68663	5.75359	3.70894	0.00187965	0.0310854	-1.14148
4930503L19Rik	1.29364	4.88995	3.51754	0.00282112	0.0465848	-1.5088		1700009P17Rik	5.81253	-0.928503	3.65239	0.00211924	0.0349947	-2.86649		Tesc	-0.762214	6.61872	-3.70797	0.00188353	0.0311024	-1.27325
Hs1bp3	5.50183	1.09968	3.5166	0.00282676	0.0466074	-2.30804		Pip4k2a	0.887709	5.89187	3.65065	0.00212704	0.0350705	-1.37667		Cnbp	-0.275027	10.0541	-3.70295	0.00190368	0.0313877	-2.08254
Kif23	6.31806	2.58503	3.51504	0.00283611	0.0466911	-2.61269		Lrrc58	-0.624895	6.84701	-3.64809	0.00213863	0.0352084	-1.57989		Tapbp	-0.388385	9.80932	-3.69934	0.00191833	0.0315815	-2.00557
Vdr	7.5247	1.5019	3.51183	0.00285551	0.0469396	-2.57204		Il21	3.90562	1.31512	3.64615	0.00214745	0.0353003	-1.80707		Rap1b	0.651489	9.36921	3.69821	0.00192295	0.03161	-2.00732
Cct6a	-0.578074	7.2662	-3.50816	0.00287779	0.0472347	-1.94569		Apobec2	-5.08355	2.03412	-3.64478	0.00215371	0.03535	-2.26254		Map4k4	-1.52869	4.14231	-3.69598	0.00193205	0.0317072	-1.29556
Lgals3	-3.72436	4.54376	-3.50608	0.00289054	0.0473727	-1.93927		Dynlt3	1.95227	5.05906	3.64044	0.00217363	0.0356003	-1.26761		Rdh14	-1.49211	4.91629	-3.69534	0.00193467	0.0317072	-1.19056
H2-Ob	5.14624	2.60679	3.50045	0.00292524	0.0478696	-2.2734		Prkag1	-0.713407	7.13068	-3.64004	0.00217548	0.0356003	-1.6346		Rbbp4	0.381635	8.73688	3.69371	0.0019414	0.0317696	-1.74184
Rpl18a	-0.368743	11.5881	-3.49852	0.00293724	0.047994	-3.19841		Hnrnpf	-0.381664	10.2552	-3.63852	0.00218249	0.0356615	-2.42642		Smc2	1.50266	6.12378	3.69112	0.00195207	0.0318965	-1.23271
Ube2g2	-1.21514	6.83523	-3.49745	0.00294389	0.0480307	-1.80237		Fes	-6.08113	1.06823	-3.63709	0.00218914	0.0357166	-2.66035		Wscd2	6.59231	-0.0282838	3.69019	0.00195591	0.0319115	-3.09773
Sgpp1	-1.57126	5.63867	-3.49335	0.00296965	0.0483787	-1.59272		Dnajb4	-5.87286	0.623695	-3.63592	0.00219461	0.0357524	-2.63629		Gdi1	-0.543343	8.03258	-3.68795	0.00196522	0.0320155	-1.59483
Eif5	-0.362704	8.70284	-3.48783	0.00300455	0.0488381	-2.40327		Rtn4rl1	-3.12153	3.97142	-3.62253	0.00225781	0.036689	-1.70923		Neil3	6.40444	2.09768	3.68309	0.0019856	0.0322993	-2.61926
Kars	-0.610109	7.21652	-3.48748	0.0030068	0.0488381	-2.00102		Twsg1	1.64036	5.16355	3.62232	0.00225882	0.036689	-1.33308		Sidt1	0.91296	6.52879	3.67584	0.00201637	0.032751	-1.37069
AI597479	1.16369	5.12828	3.48351	0.00303224	0.0491781	-1.58309		Sgsm2	5.44108	0.920367	3.61858	0.00227682	0.0369265	-2.68098		Isg20	-2.08262	4.72893	-3.67409	0.00202388	0.0328186	-1.46538
Nck2	-1.67303	4.84969	-3.48273	0.00303726	0.0491865	-1.55496		Elovl7	-5.43131	0.539974	-3.61603	0.00228917	0.0370716	-2.63673		Klrb1a	4.67592	1.87517	3.67342	0.00202677	0.0328186	-2.29498
1810034E14Rik	5.55616	1.09927	3.48122	0.00304698	0.0492708	-2.79751		Tmem108	-5.16155	-1.35446	-3.61327	0.00230262	0.0372343	-2.91518		Siva1	1.62154	4.99433	3.67277	0.00202955	0.0328186	-1.21063
2810001G20Rik	-1.59045	4.78048	-3.47817	0.00306674	0.049517	-1.56281		Eif4g2	-0.321034	9.9795	-3.6116	0.00231081	0.0372756	-2.38204		Sdhb	0.535137	8.15689	3.6707	0.00203849	0.0329144	-1.68564
Unc5cl	-1.56276	5.07149	-3.47437	0.00309155	0.0498248	-1.57385		5730508B09Rik	-5.67514	0.176651	-3.61135	0.00231201	0.0372756	-2.69744		Mri1	-0.865682	6.24965	-3.6651	0.00206283	0.0332152	-1.31239
Wee1	4.51178	2.83498	3.47386	0.00309494	0.0498248	-2.33707		Pea15a	-1.08424	5.9431	-3.60947	0.00232126	0.0373695	-1.41233		Tesk2	-5.18419	0.718837	-3.66502	0.0020632	0.0332152	-2.91374
Fam100a	-0.863982	6.33759	-3.47178	0.00310857	0.0499584	-1.80965		Itga4	-0.670612	7.43717	-3.60874	0.00232484	0.037372	-1.99085		Capzb	0.419523	9.35433	3.66114	0.00208024	0.0333924	-1.9703
Cish	-1.69626	5.60311	-3.47121	0.00311239	0.0499584	-1.63681		Dnajb9	1.33185	5.06531	3.60683	0.00233432	0.0374692	-1.32908		Tacc3	2.92636	5.4674	3.66112	0.00208033	0.0333924	-1.22682
Map2k3	0.706671	6.83613	3.46858	0.00312976	0.0501344	-1.92424		Itgam	-6.29037	1.49426	-3.60569	0.00233995	0.0375045	-2.37169		Shcbp1	7.01386	2.29897	3.65986	0.00208588	0.0334323	-2.69214
Neu3	1.57969	4.73366	3.46816	0.00313254	0.0501344	-1.58661		Pcna	-0.82103	7.4049	-3.60134	0.00236166	0.0377634	-1.80204		Mansc1	-2.1183	3.77152	-3.65734	0.00209707	0.0335404	-1.62653
Ppp1r3b	-6.65471	0.60328	-3.46221	0.00317235	0.0506534	-2.60334		Ict1	-0.869455	6.43922	-3.60106	0.00236302	0.0377634	-1.54647		Dock11	0.817757	7.29202	3.65696	0.00209877	0.0335404	-1.53786
Rps9	-0.377769	10.3908	-3.46192	0.00317425	0.0506534	-2.92216		Sepn1	-5.23061	2.30775	-3.59739	0.00238152	0.0380033	-2.38741		Fasl	-0.78148	5.71887	-3.65599	0.00210309	0.0335602	-1.52102
Ctss	0.773652	7.10551	3.45699	0.00320762	0.0511111	-2.08556		Tmem181b-ps	1.04455	6.22586	3.59244	0.00240668	0.0382986	-1.50366		Tmem71	0.787514	6.91898	3.65171	0.0021223	0.0338174	-1.54665
Ptrh1	5.95301	0.516825	3.45437	0.00322551	0.0513214	-2.71744		Cenpp	-5.58674	0.119841	-3.59237	0.00240704	0.0382986	-2.76042		Fkbp3	-0.581191	6.95165	-3.65092	0.00212584	0.0338244	-1.46545
Hivep3	3.09453	3.99906	3.45006	0.00325513	0.0517172	-1.71684		Cyth4	-0.844173	7.60432	-3.59061	0.00241604	0.0383859	-1.8428		Limd2	-0.308785	10.2709	-3.64984	0.00213073	0.0338528	-2.18753
Ap3s1	-0.793485	7.03221	-3.4475	0.00327279	0.0518557	-2.11378		Prdx2	0.619003	7.66597	3.58913	0.00242363	0.0384505	-1.88206		Ypel5	-0.682607	7.22442	-3.64686	0.00214423	0.0340178	-1.49711
5830411N06Rik	-6.55113	0.866333	-3.44742	0.00327335	0.0518557	-2.66065		Fhl3	1.25006	4.72009	3.58372	0.00245158	0.0388374	-1.36974		Ctsb	-0.458301	9.55009	-3.64572	0.00214943	0.0340509	-1.96258
Pycr2	0.78673	6.23528	3.44405	0.00329682	0.0521518	-1.87151		Tor3a	1.3595	5.62834	3.57805	0.00248126	0.0392506	-1.42853		Pask	6.39739	0.24722	3.64422	0.00215626	0.0341096	-3.10239
Ifit1	-1.61315	4.93566	-3.43771	0.00334144	0.0527052	-1.7337		Kif13a	6.06021	0.610579	3.57572	0.00249359	0.0393885	-2.71229		Mtpn	0.68712	8.22468	3.64136	0.00216942	0.034268	-1.78716
Rnf19a	1.29631	6.01011	3.43771	0.00334146	0.0527052	-1.86081		Psmg2	1.02329	6.34468	3.57389	0.00250328	0.0394846	-1.57187		Tmem66	0.506878	8.60834	3.63958	0.00217759	0.0343474	-1.84933
Abcg3	-1.23429	5.72576	-3.43641	0.00335068	0.0527744	-1.7826		Ncf1	-5.90104	0.334177	-3.57188	0.00251395	0.0395706	-2.78303		Rabac1	-0.637344	7.41651	-3.63872	0.0021816	0.034361	-1.60139
Hpcal1	0.597845	7.2939	3.43554	0.00335686	0.0527955	-2.21619		Ttn	4.54719	0.712826	3.57095	0.00251891	0.0395706	-2.21693		Erh	0.431581	7.99943	3.63576	0.00219532	0.0345273	-1.70789
Rasa1	1.15145	6.64012	3.43341	0.00337202	0.0529576	-2.0284		Npepl1	1.03032	6.34999	3.57	0.00252401	0.0395706	-1.5641		Rpl13a	-0.413337	10.4323	-3.63414	0.00220289	0.0345964	-2.344
Fam92a	1.44921	4.57524	3.43001	0.00339642	0.0532148	-1.65235		Sdf4	0.678853	8.59534	3.56985	0.00252478	0.0395706	-2.09824		Pde1b	4.88585	-1.32574	3.63292	0.00220861	0.0346364	-3.18095
Tagap	1.00294	6.63261	3.42977	0.00339814	0.0532148	-1.96085		Gm11435	-5.49679	0.489204	-3.56929	0.00252782	0.0395706	-2.76554		Pdzd8	-1.41068	5.03872	-3.62916	0.00222627	0.0348491	-1.29101
Stim2	1.34419	6.09215	3.42838	0.00340815	0.0532951	-1.83441		Rnf43	2.5443	3.75358	3.56879	0.0025305	0.0395706	-1.55897		4930579G24Rik	1.75118	4.68768	3.62868	0.00222855	0.0348491	-1.35909
Atp8a1	-0.799641	5.67739	-3.42476	0.00343444	0.0536294	-1.86337		Cyfip2	-0.828718	7.52872	-3.56812	0.00253411	0.0395706	-1.84525		Nhsl2	5.2768	-0.371684	3.6257	0.00224269	0.03502	-2.86571
Hip1r	1.48251	5.33074	3.42305	0.00344688	0.0537467	-1.70902		Slc25a5	-0.332887	10.0683	-3.56713	0.0025394	0.0395888	-2.52434		Impact	-1.26814	4.91126	-3.61972	0.0022713	0.0353361	-1.31349
Tmed10	-0.61318	7.44633	-3.4193	0.00347437	0.0540134	-2.21411		5430421N21Rik	4.93266	1.28811	3.56655	0.00254254	0.0395888	-2.90308		Cdkn1a	6.13422	0.0928892	3.61953	0.00227224	0.0353361	-3.12678
Ube2n	0.444168	8.44468	3.41858	0.00347968	0.0540134	-2.47335		Gpsm2	-5.10218	0.743354	-3.56579	0.00254667	0.0395967	-2.26638		Gnb2	0.513456	7.33077	3.61944	0.00227265	0.0353361	-1.60421
Tecpr1	-0.746011	7.20049	-3.4185	0.00348028	0.0540134	-2.15465		Icam2	-0.78404	6.76978	-3.56101	0.0025726	0.0399002	-1.69185		Srxn1	5.59032	1.84647	3.61678	0.00228555	0.0354861	-3.00725
Lig1	4.04465	4.79117	3.41739	0.00348846	0.0540134	-1.89816		Padi4	3.51307	1.55472	3.56085	0.0025735	0.0399002	-2.20382		Kif5b	0.555431	7.48315	3.61238	0.00230696	0.0357472	-1.6722
Adi1	-0.638826	6.9293	-3.41705	0.00349096	0.0540134	-2.12281		Bcas1	5.25946	-1.29084	3.55855	0.00258608	0.0400384	-2.98686		Topbp1	1.10658	5.6715	3.6116	0.0023108	0.0357472	-1.36293
Nup153	0.885228	6.17921	3.41561	0.00350166	0.0540134	-1.93608		Ywhab	-0.436576	8.83006	-3.55421	0.00260996	0.0403509	-2.21812		Got1	-0.942179	5.7417	-3.61132	0.00231218	0.0357472	-1.38965
Fhl3	1.14818	4.72009	3.41449	0.00350996	0.0540134	-1.70277		Plk4	-1.71379	4.19112	-3.5491	0.00263844	0.0407335	-1.4469		Ifih1	-2.6785	5.11291	-3.60992	0.00231904	0.0358025	-1.43054
Trim68	6.29347	1.10624	3.41448	0.00351005	0.0540134	-2.73693		Tert	5.87249	-0.00936979	3.53988	0.00269055	0.0414793	-2.74117		Snap47	1.16469	6.14384	3.5993	0.00237189	0.0365667	-1.39625
Trpc4ap	-0.512227	7.97166	-3.41417	0.00351239	0.0540134	-2.35801		Abhd4	1.95818	2.9193	3.53876	0.00269696	0.0414972	-1.46021		Rsad2	-5.20684	2.31275	-3.59809	0.00237796	0.0366085	-2.72309
Zbtb1	0.944237	6.57081	3.41402	0.00351347	0.0540134	-1.98516		Ext1	3.70328	3.23343	3.53835	0.00269931	0.0414972	-1.8858		Ifit3	-3.99035	3.75954	-3.59372	0.00240014	0.0368979	-2.14559
Tubb2a	5.09105	2.4863	3.41297	0.00352126	0.0540571	-2.37266		2010317E24Rik	-4.16926	1.29231	-3.53324	0.00272871	0.0418535	-2.04765		Etv3	-2.13132	4.59454	-3.59235	0.00240712	0.0369191	-1.54794
2210010C17Rik	-4.0808	2.24409	-3.41009	0.00354285	0.0542924	-2.33611		Rnh1	0.488001	7.50243	3.53299	0.00273016	0.0418535	-1.97501		Nek4	-5.23594	0.944136	-3.59212	0.00240828	0.0369191	-3.06104
Ftl1	0.364283	10.3363	3.4096	0.00354654	0.0542924	-2.9926		Dock11	-0.827363	7.29202	-3.52732	0.0027632	0.0423007	-1.91594		Espl1	6.78883	1.78422	3.59134	0.00241228	0.0369285	-2.89233
Fam46a	-3.24744	4.08727	-3.40655	0.0035695	0.0545361	-1.97189		Zfp870	4.69059	3.67144	3.52665	0.00276709	0.0423008	-2.1464		Ift80	4.20164	3.47816	3.58826	0.00242811	0.0371188	-2.37395
Gbp9	-0.885037	6.99336	-3.40616	0.00357245	0.0545361	-2.13971		Pydc3	-0.47395	8.78967	-3.51992	0.00280692	0.0428286	-2.18614		Tipin	1.1894	6.16072	3.58308	0.00245492	0.0374356	-1.44136
Tert	5.29219	-0.00936979	3.40451	0.00358495	0.0546505	-2.62537		Entpd1	-2.0377	5.71382	-3.51949	0.00280946	0.0428286	-1.51311		Cap2	-5.39847	1.93988	-3.58293	0.00245569	0.0374356	-2.8295
Rbbp4	0.361288	8.73688	3.40054	0.00361524	0.0550354	-2.55897		Osbpl3	-1.09264	5.8719	-3.51845	0.00281565	0.0428631	-1.63104		Sdhaf1	-1.28941	5.69114	-3.5811	0.00246525	0.0375289	-1.37542
Dtl	5.55143	3.33104	3.39932	0.0036246	0.0551009	-2.41835		Paip2	0.598607	8.55609	3.51571	0.0028321	0.0429767	-2.24418		Crtam	5.70756	1.70174	3.57997	0.00247117	0.0375594	-3.02828
St3gal6	-1.07397	6.41766	-3.39859	0.0036302	0.0551094	-1.96269		Sqrdl	5.52003	1.01584	3.51542	0.0028338	0.0429767	-2.51301		8430419L09Rik	-1.48777	5.36293	-3.57941	0.00247414	0.0375594	-1.37704
Sephs1	-0.986296	6.16564	-3.39543	0.00365463	0.0554032	-1.90024		Gm4814	4.51105	1.16718	3.51524	0.00283493	0.0429767	-2.35978		Cox10	-1.81748	5.14525	-3.57591	0.00249256	0.0377865	-1.38399
Dnajc3	-0.59621	8.16466	-3.39119	0.00368757	0.0557962	-2.48182		Mrps24	-0.747365	6.55609	-3.50989	0.00286724	0.0433267	-1.7304		Gapdh	0.400439	8.65873	3.57367	0.00250444	0.0379012	-1.95331
Crtam	5.47464	1.70174	3.39078	0.00369078	0.0557962	-2.7251		Tbl1xr1	0.836802	6.01148	3.50953	0.00286947	0.0433267	-1.6753		Gmnn	1.95845	5.03503	3.57268	0.00250972	0.0379012	-1.40685
Ube2l6	2.56718	3.17058	3.38581	0.00372986	0.056309	-2.02158		Spc25	-1.58276	4.38872	-3.50884	0.00287368	0.0433267	-1.5801		Gdap2	1.78086	4.88473	3.57252	0.00251054	0.0379012	-1.41237
Mrps24	-0.724868	6.55609	-3.38394	0.00374466	0.0564544	-2.02477		Rnf123	0.968535	6.28034	3.5088	0.00287389	0.0433267	-1.66764		Treml2	4.83105	1.60306	3.56724	0.0025388	0.0382749	-2.96038
Mt3	4.64246	-0.312306	3.38254	0.00375579	0.0564818	-3.03878		Hist1h4d	-1.38511	4.97198	-3.5037	0.00290514	0.0436827	-1.52626		Kif20b	1.57779	4.86269	3.56454	0.00255343	0.0384173	-1.41542
Tmem50b	1.90814	4.73254	3.38241	0.00375683	0.0564818	-1.73852		3110003A17Rik	-0.555186	7.49143	-3.50348	0.00290653	0.0436827	-2.03236		Dctpp1	1.64579	4.8632	3.56419	0.00255529	0.0384173	-1.4504
Ncapg	4.95106	3.47081	3.38024	0.0037741	0.0566633	-2.45301		Bmyc	2.49027	4.69074	3.50224	0.00291416	0.0436827	-1.5814		Tm6sf1	1.35696	5.41704	3.56065	0.00257456	0.0386213	-1.41938
Cxcl10	2.95706	2.99241	3.3785	0.00378803	0.0567944	-1.85119		Nfyb	-1.03273	6.66126	-3.50222	0.00291426	0.0436827	-1.83535		Gbp9	-0.873938	6.99336	-3.5604	0.00257593	0.0386213	-1.67398
Cysltr2	-1.36208	5.38233	-3.37627	0.00380599	0.0569854	-1.83217		Fbxo5	-3.27009	4.31309	-3.5017	0.00291752	0.0436827	-1.58141		Tle4	-1.821	4.73214	-3.55778	0.0025903	0.0387586	-1.51182
Rnf219	1.38421	5.14444	3.37466	0.00381894	0.0570804	-1.78102		Banf1	-0.464142	8.19351	-3.494	0.00296554	0.044341	-2.19831		Arhgdia	0.348915	9.27351	3.55686	0.00259534	0.0387586	-2.1848
Gpr34	-4.67341	3.95645	-3.3741	0.00382349	0.0570804	-2.12265		Sephs1	-1.01257	6.16564	-3.49294	0.00297219	0.0443527	-1.67021		Xcr1	-3.5596	1.41804	-3.55605	0.0025998	0.0387586	-2.46721
Slc12a3	-4.60702	-1.34368	-3.37354	0.00382802	0.0570804	-2.92986		Egr2	1.39097	3.63118	3.49258	0.00297446	0.0443527	-1.62742		Xylt2	-1.583	5.83066	-3.55569	0.00260181	0.0387586	-1.43073
Ifnar2	0.846839	6.72139	3.37121	0.00384695	0.0572845	-2.15344		Gpr171	-1.34006	6.34476	-3.48945	0.00299431	0.0445878	-1.71877		Tjp2	5.14377	2.79759	3.5555	0.00260285	0.0387586	-2.76479
Ppm1h	-0.580818	7.73083	-3.37006	0.00385638	0.0573295	-2.3682		Pik3cg	-1.13211	5.91839	-3.48701	0.00300981	0.0447391	-1.65563		Snrpe	0.481366	8.15567	3.553	0.00261669	0.0389116	-1.90224
Mthfd2	1.11354	6.06177	3.36956	0.00386049	0.0573295	-1.99908		Wdr26	1.92826	5.72607	3.48656	0.00301266	0.0447391	-1.63563		Ccr8	5.20393	2.77642	3.54908	0.00263855	0.0391834	-2.83457
Birc5	1.48257	5.96439	3.36613	0.00388862	0.0576688	-1.79527		Mical1	-1.07488	6.55437	-3.4856	0.00301884	0.0447699	-1.80881		Plin2	-1.29983	5.47426	-3.54824	0.00264323	0.0391996	-1.45063
Pmaip1	5.34473	-0.166045	3.36156	0.00392642	0.0580916	-2.89505		Hpn	4.72759	2.23318	3.48186	0.00304283	0.0450645	-2.63443		Sgk3	-1.69846	4.52948	-3.54672	0.00265181	0.0392734	-1.45341
Spsb3	-0.920523	6.66936	-3.36139	0.00392777	0.0580916	-2.13037		2010107G23Rik	5.79992	-0.93404	3.47895	0.00306171	0.0452827	-2.98239		Npepl1	-1.00294	6.34999	-3.54341	0.00267048	0.0394616	-1.52636
Map4k4	-1.54909	4.14231	-3.36023	0.00393749	0.0581565	-1.78975		Cd96	-0.743921	8.04017	-3.47731	0.00307235	0.0453617	-2.13709		Ptk2b	-0.638834	7.78005	-3.54318	0.00267175	0.0394616	-1.80895
Tprgl	-0.708966	7.83878	-3.35748	0.00396044	0.0583771	-2.37762		Lrrcc1	1.18704	5.28684	3.47685	0.00307537	0.0453617	-1.59346		Il1r1	-5.91205	-0.086348	-3.53943	0.00269314	0.0397024	-3.11258
Cyth3	2.03955	4.50398	3.35716	0.00396312	0.0583771	-1.79912		Klhl6	-0.679434	7.53344	-3.47475	0.00308908	0.0454788	-2.09147		Eif2d	1.21952	5.63696	3.53867	0.00269744	0.0397024	-1.46288
Abhd14b	4.98978	2.27294	3.356	0.00397287	0.0584419	-2.51901		Dnalc4	4.07811	2.70138	3.47436	0.00309164	0.0454788	-2.2982		Cd200r4	2.19981	3.35699	3.53841	0.00269896	0.0397024	-1.46715
Lgals3bp	-0.415704	8.02893	-3.35236	0.00400363	0.0587993	-2.52752		Tnfsf8	1.01555	2.74349	3.47146	0.0031107	0.0456371	-1.63518		Rps16	-0.33066	10.1604	-3.53697	0.00270719	0.0397698	-2.45854
Hn1l	1.39103	5.60725	3.35034	0.00402077	0.0587993	-1.91317		Cdh23	2.41519	3.39416	3.47145	0.00311076	0.0456371	-1.86893		Anxa4	5.82375	2.72313	3.53082	0.00274276	0.0401969	-2.74166
Aldh2	4.95667	0.138177	3.35027	0.00402138	0.0587993	-2.73526		Dtx3	0.92159	6.62604	3.47036	0.00311795	0.0456811	-1.82765		Snx14	-0.883569	6.23276	-3.53067	0.00274362	0.0401969	-1.57504
Dapk2	-4.24363	2.85159	-3.34984	0.00402507	0.0587993	-2.51414		Samd9l	-0.985798	6.8637	-3.46621	0.00314556	0.0460239	-1.85953		Cyb5	0.769704	6.96656	3.52957	0.00275006	0.0402371	-1.65814
Plp2	1.79845	4.75117	3.34946	0.00402824	0.0587993	-1.84319		Lrrc32	4.58057	0.0720896	3.46093	0.00318092	0.0464789	-2.5262		Gm5506	0.392425	8.51562	3.52744	0.0027625	0.0403593	-2.11431
Acpp	-2.05449	3.31102	-3.34932	0.00402949	0.0587993	-1.82374		Slc41a1	1.75997	4.53176	3.45969	0.00318932	0.0465394	-1.5969		Agpat4	5.10546	2.39111	3.52687	0.00276581	0.0403593	-2.73767
Mapk11	4.32645	3.48559	3.34714	0.00404811	0.0588694	-2.14919		Usp3	-0.874013	6.30331	-3.45491	0.00322179	0.0469504	-1.76449		Rab18	-0.760165	6.83233	-3.52504	0.00277659	0.0404626	-1.68872
Pdcd6	0.611621	7.3721	3.34657	0.00405299	0.0588694	-2.36431		Igsf3	-4.16085	1.76946	-3.4526	0.00323759	0.0471178	-2.69825		Fermt3	-0.402619	8.79924	-3.52405	0.00278244	0.0404938	-2.12673
Stat5b	1.13072	6.70214	3.34549	0.0040623	0.0588694	-2.1909		Cdkn3	-2.64649	2.4846	-3.45048	0.00325216	0.0472668	-1.80824		Rap2b	0.744073	6.77348	3.52165	0.00279662	0.0406459	-1.66008
Rps7	-0.32883	10.4022	-3.34539	0.00406314	0.0588694	-3.15375		Mccc2	3.73825	2.94352	3.4495	0.00325899	0.0473031	-2.40143		Slc35c2	-0.909367	6.26561	-3.51773	0.00281996	0.0409306	-1.56844
Plin2	-1.26574	5.47426	-3.34534	0.00406358	0.0588694	-1.92901		Cdk5r1	4.95692	-1.08116	3.44423	0.00329556	0.0477704	-2.95962		Fam64a	7.09368	1.00264	3.51497	0.00283656	0.0411169	-3.09825
Pcbp2	-0.938161	6.25028	-3.34498	0.00406665	0.0588694	-2.06559		Fbxo33	3.92708	3.02757	3.44044	0.00332218	0.0480923	-2.25607		Cit	5.87697	1.15608	3.51298	0.00284853	0.0412358	-2.97074
E2f8	5.55082	2.091	3.34366	0.004078	0.0589471	-2.803		Npc2	-0.599125	8.01177	-3.43888	0.00333315	0.0481659	-2.24689		Rpa2	1.13984	6.27402	3.51044	0.00286394	0.0413784	-1.59933
Vamp5	1.05231	4.91795	3.34311	0.00408282	0.0589471	-1.88452		Cx3cr1	-10.4884	1.7499	-3.43846	0.00333609	0.0481659	-2.73533		Sdcbp	0.535289	9.29634	3.50992	0.00286707	0.0413784	-2.28775
2310061I04Rik	1.15056	5.22486	3.34215	0.00409105	0.0589879	-1.86294		Cenpl	-1.34314	4.3642	-3.43637	0.00335092	0.0483162	-1.66065		Itgam	5.49491	1.49426	3.50948	0.00286976	0.0413784	-2.62145
Peli1	-0.547803	7.52661	-3.33997	0.00410998	0.0591683	-2.36235		Chmp3	-0.719195	6.49545	-3.43444	0.00336466	0.0484013	-1.89717		Fbxo5	3.01111	4.31309	3.50835	0.00287664	0.0414136	-1.63569
Ndufs6	0.5838	6.829	3.33946	0.0041144	0.0591683	-2.25082		Asf1b	-1.24237	5.75335	-3.4343	0.0033657	0.0484013	-1.92524		Impdh1	-0.73868	6.3622	-3.50783	0.00287979	0.0414136	-1.65824
Stx6	0.741218	7.02215	3.33793	0.0041278	0.0592827	-2.31906		Oaz2	0.656253	6.5523	3.4299	0.00339721	0.0487859	-1.96353		Stil	6.32245	1.50813	3.50192	0.00291614	0.0418811	-2.95777
Fam82a1	-4.27887	2.5834	-3.33385	0.00416355	0.0597177	-2.24493		Sept4	-6.06537	0.263968	-3.42932	0.00340138	0.0487859	-2.8502		Atxn3	1.68354	4.32674	3.50127	0.00292014	0.0418835	-1.68272
Dnahc8	4.59314	3.80778	3.33197	0.00418019	0.0598776	-2.23386		Klrb1b	-7.37992	1.06475	-3.42563	0.00342807	0.0490978	-2.81305		Fam149b	1.14184	5.35331	3.49925	0.00293269	0.0419706	-1.52791
Vps37b	-0.865366	6.54982	-3.32979	0.00419953	0.0600758	-2.1739		Mctp1	5.56967	0.570861	3.42507	0.00343212	0.0490978	-2.9938		Gstm1	5.57965	-0.284082	3.49906	0.0029339	0.0419706	-3.13667
Dennd4a	-1.66524	5.11756	-3.32907	0.00420592	0.0600885	-1.83282		Ankrd44	-0.603573	7.80996	-3.42338	0.00344447	0.0491168	-2.22156		1110034A24Rik	1.79749	4.61306	3.49596	0.00295323	0.0421408	-1.58915
Efr3a	-0.606764	7.66502	-3.32745	0.00422038	0.0602163	-2.43667		Hivep2	1.15847	5.30968	3.42323	0.00344554	0.0491168	-1.73326		BC013712	4.69292	0.557902	3.49591	0.00295352	0.0421408	-2.67411
Lpcat4	-0.61963	7.4235	-3.32559	0.00423702	0.0602222	-2.45091		Lypla1	-0.720483	7.34076	-3.42293	0.00344777	0.0491168	-2.13934		Aspm	6.18807	1.87854	3.49343	0.00296914	0.042295	-2.91001
Ust	-5.32038	0.907084	-3.32553	0.00423754	0.0602222	-2.97358		Fam49b	-0.495136	8.21048	-3.42199	0.00345464	0.0491168	-2.35348		Rundc3b	-5.2336	3.35944	-3.49296	0.00297208	0.042295	-2.49314
Ebi3	3.10209	3.14981	3.32463	0.00424557	0.0602222	-2.10448		Il12rb2	-2.54505	5.69198	-3.42177	0.00345627	0.0491168	-1.66665		Prkca	1.23144	6.23329	3.48973	0.00299248	0.0425298	-1.55459
Ric8b	-3.49461	2.25168	-3.32457	0.00424611	0.0602222	-2.44685		Pfn2	6.03917	0.900876	3.4212	0.00346045	0.0491168	-2.79754		Hadhb	-0.496787	8.24183	-3.48854	0.00300007	0.0425823	-2.05609
Nr1d2	-2.99524	4.64849	-3.3233	0.00425756	0.0602222	-1.86197		Ttc28	3.12414	2.77673	3.41437	0.00351085	0.0497153	-2.39533		Mt1	5.28022	-1.08378	3.48612	0.00301552	0.0427459	-3.28597
Nptn	-0.891987	6.77206	-3.32315	0.00425894	0.0602222	-2.17604		Wdr6	1.02074	6.29731	3.41324	0.00351931	0.0497153	-1.87105		Depdc1a	4.36848	2.6629	3.48381	0.0030303	0.0428998	-2.33717
Rin3	0.746246	7.26277	3.3231	0.00425942	0.0602222	-2.3666		Pitpnc1	-0.516984	7.76629	-3.41305	0.00352067	0.0497153	-2.26609		Slfn1	-0.568822	7.40728	-3.48015	0.0030539	0.0430902	-1.8949
Actn1	4.12084	3.56045	3.31602	0.00432363	0.0610511	-2.2875		Cdc25c	-5.49307	-0.00628531	-3.41303	0.00352084	0.0497153	-2.75062		Hmgb3	2.61921	4.42267	3.48011	0.00305418	0.0430902	-1.94523
Bst2	-1.00152	5.608	-3.31493	0.00433367	0.0611138	-2.01061		Cd5	0.680651	8.10777	3.412	0.00352856	0.0497599	-2.3991		Pop4	1.43579	5.19755	3.47934	0.00305916	0.0430902	-1.56097
Psmb9	0.481408	8.43391	3.31196	0.00436097	0.0614194	-2.69587		Rap1gap	5.21748	-0.706182	3.40998	0.00354369	0.0499089	-2.96429		Plcg2	5.78838	2.16973	3.47928	0.00305954	0.0430902	-2.49064
Tmem20	-4.83418	1.57095	-3.3094	0.00438466	0.0616734	-2.61623		Adrb2	-3.82869	3.47677	-3.40827	0.00355654	0.0500254	-2.15038		Atp11b	0.847535	7.56422	3.4765	0.00307762	0.0432889	-1.94683
Slc20a1	-0.796793	6.73214	-3.30685	0.00440837	0.0618986	-2.23041		Ppp3cc	-0.974127	6.28061	-3.40209	0.00360342	0.0506142	-1.8499		2010300C02Rik	-4.94858	1.38661	-3.47532	0.00308534	0.0432922	-2.58865
Hgsnat	-1.07489	6.08376	-3.30594	0.00441683	0.0618986	-2.0857		Pdgfb	-5.10211	0.976851	-3.40073	0.0036138	0.0506142	-2.66569		2700029M09Rik	0.988673	5.89417	3.47525	0.00308578	0.0432922	-1.62552
Ppfibp1	4.58779	1.28984	3.30585	0.00441768	0.0618986	-2.72529		Serpinb6b	-0.632246	7.08747	-3.4005	0.00361554	0.0506142	-2.12976		Smchd1	0.968754	6.08345	3.47333	0.00309838	0.0433666	-1.66269
Commd8	-0.578216	7.13188	-3.30113	0.00446202	0.0624079	-2.39565		Vwa5a	2.87592	4.96639	3.40032	0.00361695	0.0506142	-1.76266		Itgae	2.21081	4.13167	3.47323	0.00309904	0.0433666	-1.71226
Myh9	0.627702	7.82339	3.30076	0.00446546	0.0624079	-2.52702		Flywch2	4.83103	-0.746338	3.3996	0.00362244	0.0506261	-3.00065		2010002M12Rik	-5.41696	-1.08735	-3.47242	0.0031044	0.0433861	-3.33793
Abcb1a	-2.89958	4.35423	-3.29569	0.00451364	0.0630005	-1.92847		Ptges3	-0.540984	8.02012	-3.39811	0.00363393	0.0506678	-2.32459		Akr1c13	-1.15085	4.80376	-3.47079	0.00311511	0.0434801	-1.57881
Birc3	-0.784298	6.43063	-3.29176	0.00455129	0.0634359	-2.20865		Larp1b	3.83856	1.04586	3.39801	0.00363471	0.0506678	-2.27576		Fam82a1	-3.87883	2.5834	-3.46673	0.00314208	0.0437207	-2.25726
4931406H21Rik	-5.33541	2.10452	-3.29122	0.00455646	0.0634359	-2.69668		Atp1a1	-1.25011	5.97066	-3.39423	0.00366391	0.050892	-1.87599		Casp3	1.78785	4.434	3.46649	0.00314368	0.0437207	-1.75557
Csf2	-4.95374	0.766481	-3.28789	0.00458869	0.0638033	-2.90128		2700094K13Rik	-0.779904	6.36713	-3.39413	0.00366469	0.050892	-1.98693		Abcb1a	-2.2114	4.35423	-3.46639	0.00314436	0.0437207	-1.61809
Acaa2	-0.795993	6.74417	-3.28666	0.00460066	0.0638883	-2.29754		Cct5	-0.428261	8.60351	-3.39412	0.00366478	0.050892	-2.48748		Mcoln2	5.84636	-0.922431	3.45782	0.003202	0.0444574	-3.30279
Hsp90aa1	0.419214	8.46439	3.28081	0.00465784	0.0646002	-2.74616		Lpin1	-1.66465	5.1318	-3.39176	0.00368315	0.051082	-1.74265		Ffar2	-4.795	-0.502293	-3.4573	0.00320549	0.0444574	-3.01127
Efha2	2.58615	3.00594	3.27692	0.00469629	0.0650508	-2.19602		Cobll1	-1.89085	3.86953	-3.38896	0.00370508	0.0513043	-1.7902		Pcna	0.77297	7.4049	3.45608	0.0032138	0.044516	-1.96401
Itk	-0.399016	8.69538	-3.27578	0.00470763	0.0651251	-2.84893		Fam46a	-3.23042	4.08727	-3.38851	0.00370858	0.0513043	-2.06833		Qsox2	-3.96514	1.89376	-3.45062	0.0032512	0.044977	-2.84826
Isyna1	0.666411	6.97218	3.27467	0.00471871	0.0651958	-2.4114		Ncapd3	-1.01035	6.04568	-3.38738	0.00371743	0.0513501	-1.91591		Myh9	0.638516	7.82339	3.44863	0.00326496	0.0449996	-2.03023
Herc3	-1.76563	4.81802	-3.26812	0.00478453	0.0660204	-1.9639		Etv3	2.05784	4.59454	3.38685	0.00372161	0.0513501	-1.77069		Gpr146	4.43214	2.76494	3.44843	0.00326635	0.0449996	-2.42081
Tmem9b	-0.732696	7.58457	-3.26753	0.00479049	0.0660204	-2.5242		Poc1a	-5.1974	1.67466	-3.3863	0.003726	0.0513501	-2.63016		Vars2	-3.13032	3.65836	-3.44822	0.00326784	0.0449996	-2.15048
Fntb	-1.43877	5.30852	-3.26616	0.00480433	0.066088	-2.01883		Chchd10	1.48047	4.46986	3.38478	0.00373802	0.0514508	-1.73953		Nfyb	1.01182	6.66126	3.448	0.00326932	0.0449996	-1.81701
Ubap1	-1.21008	6.00792	-3.26585	0.0048075	0.066088	-2.14301		Zbtb16	1.48763	5.86573	3.38294	0.00375259	0.0515863	-1.85376		Chst15	-3.97559	3.60076	-3.44598	0.00328334	0.0451355	-2.40662
Ecm1	4.05287	3.55501	3.26073	0.00485975	0.0667223	-2.29311		Bcl2a1a	1.79842	4.1906	3.37929	0.00378168	0.0519209	-1.81078		Hiatl1	0.961895	6.59158	3.44528	0.00328825	0.0451463	-1.7971
Cab39	0.762676	6.99769	3.25917	0.00487586	0.0668594	-2.43679		0610010K14Rik	-0.746028	6.68638	-3.37616	0.00380686	0.0522009	-2.05765		Lrp10	0.570374	8.5943	3.44397	0.00329737	0.0452145	-2.20698
Eef2k	-6.3744	0.255116	-3.25779	0.00489008	0.0669701	-2.924		Tmem176a	-6.94612	1.33142	-3.37501	0.00381615	0.0522626	-2.92684		Chaf1a	3.5918	3.33288	3.44258	0.00330715	0.0452917	-2.42989
Ctdnep1	1.28618	5.10444	3.25591	0.00490956	0.0671378	-2.00962		Ncoa7	1.77039	4.54876	3.37414	0.00382322	0.0522939	-1.75137		Ostf1	0.489038	7.72503	3.44177	0.00331283	0.0453127	-2.1273
B4galt1	-0.459465	8.0393	-3.25537	0.00491516	0.0671378	-2.65258		BC017612	4.9661	1.12164	3.36777	0.00387511	0.0529371	-2.86902		Sfrp2	4.81331	-1.0669	3.43865	0.00333478	0.0455558	-3.31833
Rgs16	5.54271	1.51627	3.25483	0.00492077	0.0671378	-2.65751		Haus6	-1.14165	4.94951	-3.36687	0.00388251	0.052972	-1.80472		B2m	-0.285522	13.0163	-3.43738	0.0033438	0.045622	-3.68397
Rasl11b	-4.88316	1.73958	-3.25393	0.00493006	0.0671805	-2.70517		Fosl2	-5.58017	0.228711	-3.36473	0.00390016	0.0531463	-2.95538		Kif4	6.51698	2.13426	3.4335	0.00337141	0.0459413	-2.87268
Cyth2	1.43254	4.97372	3.25126	0.00495798	0.0672393	-2.01295		Ptprcap	0.35088	10.1081	3.36162	0.00392593	0.0534309	-2.98225		D2Ertd750e	2.14577	3.96573	3.43202	0.00338194	0.0460273	-1.75802
Gna11	-1.65359	4.86569	-3.25105	0.00496023	0.0672393	-1.97894		Gm14446	-1.20678	6.4527	-3.35859	0.00395118	0.0537076	-1.88997		Cx3cr1	8.89904	1.7499	3.43108	0.00338873	0.0460357	-2.79764
Cltb	-1.1123	5.25493	-3.25096	0.00496109	0.0672393	-2.06827		Acsf3	2.62145	3.98189	3.35329	0.00399573	0.054225	-1.9559		Klrc2	1.257	3.71288	3.43076	0.00339099	0.0460357	-1.70949
Mapre2	0.58732	7.53581	3.25087	0.00496204	0.0672393	-2.6024		Snn	4.50085	-0.890134	3.35288	0.00399919	0.054225	-2.95161		Zbtb32	6.08194	-0.452333	3.4285	0.00340731	0.0461997	-3.30607
2210417A02Rik	4.49717	-1.348	3.25057	0.00496518	0.0672393	-3.07235		Abcb9	0.850147	7.28618	3.35022	0.0040218	0.0544639	-2.23281		Kpna3	0.819177	6.5378	3.4279	0.00341165	0.0462012	-1.83134
Tmem194b	1.12234	5.50405	3.24971	0.00497426	0.0672788	-2.11884		Kif18b	-4.04411	1.19179	-3.34941	0.00402873	0.0544903	-2.44802		Rnf123	-0.922798	6.28034	-3.4264	0.00342253	0.0462911	-1.74329
Fbxo27	-2.44437	3.81518	-3.24676	0.00500538	0.067616	-2.03923		Rhog	0.417993	8.55131	3.34625	0.00405577	0.0547219	-2.60487		Stx18	-1.59673	4.61965	-3.42309	0.00344659	0.0465588	-1.72112
Il17rb	-0.944867	4.73984	-3.2436	0.00503886	0.0679204	-2.23615		Sfrp2	-4.68807	-1.0669	-3.34623	0.00405589	0.0547219	-3.05159		Nt5e	-1.0481	6.39371	-3.42012	0.00346838	0.046739	-1.71844
1600014C10Rik	-1.08056	6.79683	-3.24311	0.00504407	0.0679204	-2.3584		Ctss	0.74906	7.10551	3.34369	0.00407781	0.0548234	-2.26495		Tmem163	5.32684	0.88468	3.4201	0.00346849	0.046739	-2.95598
Gm16973	4.31203	1.60904	3.24287	0.00504659	0.0679204	-2.64766		Itgb1	-0.405892	10.1547	-3.34365	0.00407816	0.0548234	-3.22768		Zfp523	-4.76027	2.61895	-3.41773	0.00348597	0.0469166	-2.94276
Nol10	1.48842	4.58968	3.24059	0.00507101	0.0681651	-1.9926		Napsa	-5.72452	1.40858	-3.34317	0.00408226	0.0548234	-2.72744		Anp32e	1.11397	6.51108	3.41454	0.00350962	0.0471767	-1.81101
D1Ertd622e	-2.85818	3.75927	-3.23911	0.0050869	0.0682946	-2.23142		Fhl2	-4.05982	3.06774	-3.34303	0.0040835	0.0548234	-2.24622		Parp11	-1.24663	5.64587	-3.41143	0.00353283	0.0474303	-1.72299
Fgl2	-1.76974	6.26237	-3.23637	0.0051164	0.0685312	-2.05515		Arl6ip5	-0.650708	6.87349	-3.34174	0.00409461	0.054905	-2.17546		2310044G17Rik	1.60259	5.23724	3.4105	0.00353981	0.0474656	-1.69277
Gm15645	1.35577	4.20109	3.23631	0.00511708	0.0685312	-1.99968		Mtap4	-0.937541	6.14144	-3.33802	0.00412696	0.0552709	-2.05935		Bcr	-4.11147	2.01146	-3.40924	0.00354923	0.0475336	-2.72839
Kif14	4.61022	1.07653	3.2355	0.00512574	0.0685631	-3.0737		Tmem2	1.83799	3.85513	3.33583	0.00414616	0.05546	-1.83396		Atxn1l	-3.94645	2.30964	-3.40809	0.00355788	0.0475585	-2.63306
Cdca5	5.83753	2.0963	3.2333	0.00514965	0.0687985	-2.94232		Batf	0.7831	6.62799	3.32812	0.00421441	0.0563039	-2.18556		Mybl2	6.80758	1.46589	3.40784	0.00355981	0.0475585	-3.10938
Cnrip1	5.3164	1.11462	3.22671	0.0052218	0.0696772	-2.76505		BC048355	4.7535	-0.648551	3.32584	0.00423478	0.0564495	-2.92796		Prdx1	0.413202	9.11729	3.4059	0.00357442	0.0476953	-2.43886
Zap70	0.395917	8.97868	3.22499	0.00524074	0.0698446	-3.03233		Slamf1	1.36038	5.36479	3.32574	0.00423565	0.0564495	-1.90882		Cdh17	5.16168	-1.52773	3.40425	0.00358694	0.047804	-3.39904
Pmel	4.67937	-0.01421	3.22309	0.0052618	0.0699802	-3.07469		1700026L06Rik	-4.35211	-0.684671	-3.32481	0.00424399	0.0564917	-2.92562		Sidt2	-0.547164	7.54947	-3.40194	0.00360457	0.0479803	-2.12291
Pold3	1.8006	5.38012	3.22292	0.00526374	0.0699802	-2.05424		Nusap1	-3.50863	4.31944	-3.32363	0.00425459	0.0565638	-1.8433		Gabpb2	1.20897	5.14695	3.39775	0.00363668	0.0483113	-1.71154
Shkbp1	0.916627	6.59724	3.22097	0.00528544	0.0701386	-2.38503		Snrpd3	-0.706953	6.84138	-3.32287	0.00426144	0.0565859	-2.18512		Rnf115	0.644708	7.12415	3.39748	0.00363876	0.0483113	-2.02146
Acox3	1.3435	4.65536	3.2207	0.00528851	0.0701386	-2.03579		Idh1	-6.27502	0.936773	-3.32166	0.00427241	0.0566626	-2.85129		Plek	6.44424	3.39389	3.39697	0.00364271	0.0483113	-2.56725
Ext1	2.64042	3.23343	3.22003	0.00529594	0.0701519	-2.0837		Kif1b	-3.51622	3.6645	-3.32099	0.00427844	0.0566738	-2.19968		Cdkn2aipnl	0.68197	7.26276	3.39506	0.00365751	0.0483888	-2.04278
Rps14	-0.308871	10.3202	-3.21607	0.00534033	0.0705254	-3.39071		D2Ertd750e	-2.69722	3.96573	-3.32006	0.00428691	0.0567171	-1.9796		Slc27a6	-4.05908	2.33007	-3.39463	0.00366084	0.0483888	-2.34118
Grwd1	1.12251	4.82654	3.21558	0.00534594	0.0705254	-2.09352		Cdc40	-1.13619	6.10999	-3.31626	0.00432145	0.0571048	-1.98803		Gbe1	-1.11049	5.56447	-3.39394	0.00366615	0.0483888	-1.74073
Rps16	-0.308656	10.1604	-3.21546	0.00534724	0.0705254	-3.35185		Kif14	-2.66221	1.07653	-3.31464	0.0043363	0.0572319	-2.23875		1700029F09Rik	1.29247	5.24952	3.39392	0.00366629	0.0483888	-1.71806
Paqr7	2.31085	4.0138	3.21522	0.00534998	0.0705254	-2.10145		Fis1	0.446559	8.11582	3.31367	0.00434521	0.0572802	-2.54389		Nebl	2.83829	2.68427	3.3924	0.00367818	0.0484582	-2.1144
Rpl36	-0.363197	9.49276	-3.21062	0.00540221	0.0709812	-3.19598		Rasgef1a	4.00275	0.66842	3.31225	0.00435826	0.0573505	-2.39542		Aurkb	4.06927	4.33666	3.39211	0.00368042	0.0484582	-2.13455
Ppp3ca	-2.02283	5.6448	-3.21061	0.00540223	0.0709812	-2.07628		Jub	-3.79873	1.87594	-3.31195	0.00436105	0.0573505	-2.64587		Nrarp	4.16974	1.15214	3.39121	0.0036874	0.0484916	-2.67554
Oas2	-4.81055	0.00741505	-3.21012	0.0054078	0.0709812	-2.8718		Lnx2	1.2484	5.43413	3.31119	0.00436805	0.0573734	-1.9526		Lypla1	0.675234	7.34076	3.38875	0.00370671	0.0486314	-2.09956
Ank	4.52569	2.43787	3.20954	0.00541449	0.0709812	-2.706		Polr1b	-3.03604	4.57862	-3.30764	0.00440094	0.0577359	-2.06171		Cox5b	0.521772	8.13792	3.38872	0.00370694	0.0486314	-2.25059
Polr1b	-2.95425	4.57862	-3.20931	0.00541707	0.0709812	-2.16231		Taf12	-0.80681	6.49652	-3.3067	0.00440974	0.0577754	-2.16672		BC035044	2.06818	3.55578	3.38672	0.00372267	0.048779	-1.78298
Timm23	-0.610556	8.05828	-3.20771	0.00543538	0.0711358	-2.80496		Mcm4	-0.850549	7.3366	-3.30617	0.00441469	0.0577754	-2.42408		Actn2	-1.75476	3.40994	-3.38562	0.00373135	0.0487831	-1.96793
Ddah2	5.26272	-0.331127	3.20267	0.0054935	0.0718102	-3.09524		Klrc1	-7.19315	4.8964	-3.30478	0.00442765	0.0577754	-2.41146		Sord	3.41196	3.09792	3.38517	0.00373493	0.0487831	-2.49823
Tspan6	4.79091	-1.118	3.19453	0.00558867	0.0729669	-2.98931		Rhoa	-0.435322	8.99057	-3.30468	0.00442863	0.0577754	-2.77984		Dleu2	1.75273	4.19832	3.38498	0.00373639	0.0487831	-1.88593
9030617O03Rik	-5.42894	1.64934	-3.19333	0.00560287	0.0730649	-2.71695		Rrm1	-0.880308	6.89244	-3.30409	0.0044341	0.0577754	-2.40031		Csda	3.80664	2.11147	3.38395	0.00374457	0.0488315	-2.70902
Tbc1d16	-4.86644	-1.44238	-3.1914	0.00562563	0.0731874	-3.12833		Zfp365	5.88612	0.595679	3.30392	0.00443571	0.0577754	-2.96277		Rcbtb1	1.06516	5.63185	3.38107	0.00376751	0.049072	-1.77681
Zfp36	0.562889	6.88697	3.1914	0.00562567	0.0731874	-2.51085		Depdc1a	-4.22436	2.6629	-3.30152	0.00445836	0.0579955	-2.29549		Atp1a1	1.1412	5.97066	3.37963	0.00377898	0.049115	-1.84778
Fancd2	4.76628	1.06133	3.18709	0.005677	0.0737672	-3.06771		Slc26a2	1.15639	5.26277	3.301	0.00446324	0.0579955	-1.94233		Baiap2	1.83715	4.77388	3.37953	0.00377981	0.049115	-1.80306
C1galt1	-4.66774	0.233315	-3.18606	0.00568932	0.0738394	-2.96696		Prelid1	-0.44426	7.96326	-3.2984	0.00448781	0.0582454	-2.55994		Nr1d2	-1.93947	4.64849	-3.37571	0.00381052	0.0494552	-1.74892
Sgpl1	0.790081	6.54341	3.18303	0.00572586	0.0742253	-2.47802		Nrg4	5.16204	-0.916497	3.29625	0.00450827	0.0583649	-3.08292		Ttc13	1.32075	5.5599	3.37454	0.00381994	0.0495185	-1.78526
Efhd2	-0.585214	8.10058	-3.18208	0.00573727	0.0742851	-2.7513		Cenpf	-1.7873	3.95433	-3.29619	0.00450883	0.0583649	-1.89264		Gm12253	-4.20914	-0.99266	-3.37101	0.00384858	0.0498306	-3.30784
Nr4a1	4.4426	5.26603	3.18152	0.00574415	0.074286	-2.12349		Tyrobp	-7.49528	4.9783	-3.29575	0.00451305	0.0583649	-2.26185		Mns1	3.26452	2.96395	3.37015	0.00385559	0.0498623	-2.53234
Wipf1	-0.717529	7.40072	-3.18021	0.00576	0.0743239	-2.69201		Atxn7l3b	0.910641	6.49931	3.29288	0.00454052	0.0586506	-2.14314		BC030867	5.34139	1.07569	3.36771	0.0038756	0.050038	-3.08526
E130308A19Rik	3.65497	4.33691	3.18015	0.0057607	0.0743239	-2.15518		Tagap1	1.0462	5.19483	3.29	0.00456828	0.0588719	-1.94132		Slc52a3	5.34266	1.00055	3.36738	0.00387835	0.050038	-3.08957
Rap1gap	4.75169	-0.706182	3.17905	0.00577408	0.0744085	-3.0052		Mxd1	-2.27379	4.67931	-3.28998	0.00456844	0.0588719	-1.91715		Usp42	-1.17638	5.04545	-3.35827	0.00395388	0.0509154	-1.78112
Ran	0.455649	9.06904	3.176	0.00581128	0.0747946	-3.0811		Slc12a2	4.98472	0.661141	3.2882	0.0045857	0.0590247	-2.95555		Tbrg3	-3.67003	2.87564	-3.35805	0.00395568	0.0509154	-2.59642
Bcl2	-1.14071	6.6337	-3.17548	0.00581774	0.0747946	-2.40367		Mdm1	-5.19163	2.18921	-3.28742	0.00459327	0.0590525	-2.55291		Evi2a	-0.986327	5.96994	-3.35715	0.00396325	0.0509527	-1.82353
Fam84b	-4.03804	1.61812	-3.1707	0.00587656	0.075462	-2.61398		Ppm1j	-1.07145	6.27884	-3.28671	0.00460016	0.0590715	-2.07261		Ppp1r3b	-5.87664	0.60328	-3.35596	0.00397323	0.0510209	-2.98339
Ppfibp2	5.57623	-1.2369	3.16945	0.00589209	0.0755724	-3.13651		Nlrc5	-0.665088	7.59991	-3.28544	0.00461256	0.059161	-2.47127		Nrm	2.48212	4.95629	3.35388	0.00399078	0.0511861	-1.80722
5430421N21Rik	-2.33344	1.28811	-3.16822	0.00590736	0.0756793	-2.2965		Pold1	-1.21874	5.37453	-3.28476	0.00461916	0.0591762	-2.01571		Capg	0.953496	6.63728	3.35297	0.00399845	0.0512243	-1.97256
Flywch2	4.37428	-0.746338	3.16433	0.00595598	0.0761823	-3.03615		Donson	-1.00806	5.89348	-3.2822	0.00464418	0.0594271	-2.07058		Cysltr2	-1.20908	5.38233	-3.35219	0.00400507	0.051249	-1.82395
Lims1	0.445176	7.83167	3.16297	0.00597305	0.0761823	-2.8588		Cpne8	0.933096	5.05071	3.28037	0.00466224	0.0595883	-1.95809		Gas7	5.68469	0.980611	3.34932	0.00402948	0.0515009	-2.95295
Sdccag3	-0.693443	6.79744	-3.16154	0.00599119	0.0761823	-2.56169		Gstt2	1.05228	4.96387	3.27516	0.00471388	0.0601079	-1.99981		Utrn	-0.666879	8.41482	-3.3476	0.00404413	0.0515916	-2.336
Zfp187	-0.551662	7.2197	-3.16151	0.0059915	0.0761823	-2.72924		Ublcp1	1.15935	5.15212	3.27515	0.00471391	0.0601079	-1.96586		Tcn2	-1.69683	5.17394	-3.34738	0.00404603	0.0515916	-1.81509
Gm19757	0.626608	6.7725	3.16136	0.00599334	0.0761823	-2.59695		Pfdn5	0.463857	8.10062	3.27268	0.00473863	0.0603526	-2.61353		Scpep1	2.12111	4.20622	3.34625	0.00405576	0.0515974	-1.99837
Impact	-1.06384	4.91126	-3.16125	0.0059948	0.0761823	-2.20584		D1Ertd622e	-2.89173	3.75927	-3.26793	0.00478645	0.0608906	-2.2607		Klhl7	-2.65835	4.22694	-3.34623	0.00405594	0.0515974	-1.99806
Gm6682	0.795797	6.77723	3.16104	0.0059974	0.0761823	-2.47195		Whsc1l1	-0.66568	7.42694	-3.26464	0.00481983	0.0611874	-2.47916		Pola2	0.754102	6.1197	3.34542	0.00406285	0.0516252	-1.9022
Rccd1	5.14513	0.0568585	3.16064	0.00600245	0.0761823	-2.94483		Cisd3	-0.88968	5.72094	-3.26391	0.0048272	0.0611874	-2.11456		Dscc1	5.27909	1.59587	3.3431	0.00408284	0.0518188	-2.95933
Snx9	5.34194	-0.313106	3.15769	0.00603998	0.0765696	-3.13245		Anln	-3.58097	1.98867	-3.26357	0.00483071	0.0611874	-2.27917		Dvl2	-1.52041	4.90732	-3.33994	0.0041103	0.0520525	-1.81312
Lta4h	-0.648243	7.83561	-3.15487	0.00607585	0.0768851	-2.81377		Kdm5b	1.12521	6.32457	3.26342	0.00483221	0.0611874	-2.12726		Diap3	4.57438	1.46498	3.33988	0.00411079	0.0520525	-2.91571
Lnx2	1.11892	5.43413	3.15463	0.00607896	0.0768851	-2.3236		Hsbp1	0.564226	7.44812	3.26221	0.00484464	0.0612382	-2.50019		Smug1	3.80867	2.63913	3.33842	0.00412352	0.052109	-2.69964
Shmt1	2.46934	3.51368	3.15402	0.00608684	0.0768956	-2.24022		Psrc1	-4.91449	-0.52147	-3.26193	0.00484744	0.0612382	-3.05684		Ppp1r16b	-0.553527	8.5702	-3.33827	0.0041248	0.052109	-2.43897
Tbc1d5	1.493	4.56851	3.15159	0.00611798	0.0771997	-2.15811		Dcaf15	2.288	3.84115	3.25725	0.00489564	0.0617756	-2.15801		Magohb	2.16778	3.83657	3.32922	0.00420459	0.0528939	-2.02746
Mfsd5	-0.688796	7.0904	-3.15064	0.00613026	0.0772226	-2.67779		E330016A19Rik	-2.10956	3.56139	-3.25049	0.00496611	0.0625288	-2.09757		Sgol2	2.51871	3.93325	3.32915	0.00420518	0.0528939	-2.14827
Lrrc51	-4.59735	0.579302	-3.15036	0.00613394	0.0772226	-2.9412		Jarid2	1.31057	5.33969	3.25042	0.00496678	0.0625288	-2.06794		Hist3h2a	-1.69188	4.74497	-3.32912	0.00420546	0.0528939	-1.84586
Cenpn	4.29185	2.78168	3.14953	0.00614463	0.077268	-2.60854		Prune	-1.76703	4.34775	-3.24856	0.00498638	0.0627032	-1.99735		As3mt	4.33103	2.72707	3.32864	0.00420974	0.0528939	-2.48638
Smpd1	-1.1428	5.75515	-3.14468	0.00620773	0.0779219	-2.30252		Tmem163	-4.83229	0.88468	-3.24717	0.00500099	0.0628145	-2.70915		2010016I18Rik	0.937732	6.59997	3.32848	0.00421116	0.0528939	-1.9123
Tiam1	3.51415	2.22466	3.14443	0.00621091	0.0779219	-2.56816		Rapgef5	4.59087	-1.60235	3.2457	0.00501651	0.062897	-3.16558		Rad51	2.64457	4.45661	3.32677	0.00422646	0.0530184	-2.02891
Plcl1	5.25359	-0.550636	3.14054	0.0062621	0.0784739	-3.05181		Pik3ip1	-1.50491	5.64028	-3.24546	0.00501908	0.062897	-2.02051		Mfsd2a	6.18424	-0.373588	3.32628	0.00423079	0.0530184	-3.36829
Ngfrap1	0.764588	5.95679	3.13539	0.00633031	0.0792081	-2.42345		Adck3	2.58058	4.35506	3.2444	0.00503039	0.0629664	-2.01465		Irf9	-0.749928	7.36303	-3.32261	0.00426382	0.0533711	-2.1882
Clspn	4.15637	2.35424	3.13502	0.0063352	0.0792081	-2.82886		Ap1m1	-0.543223	7.38984	-3.24322	0.00504294	0.0630512	-2.51982		Chdh	-3.87475	1.69181	-3.31992	0.00428812	0.0535519	-2.90753
Usp34	1.84512	5.4636	3.13375	0.00635217	0.0792874	-2.25183		Haus8	-1.81303	4.49155	-3.24197	0.00505619	0.0631445	-1.99017		Sccpdh	5.96931	3.50162	3.31971	0.00429001	0.0535519	-3.10475
Rai12	1.04595	5.87644	3.13346	0.00635607	0.0792874	-2.39709		Tmem149	0.912093	6.43357	3.23848	0.00509358	0.0635388	-2.25411		Hs2st1	-4.61108	1.30616	-3.31895	0.00429693	0.0535519	-3.20588
Ints7	1.35049	5.37643	3.13115	0.00638706	0.079583	-2.283		Tfpi	2.31384	3.53748	3.23303	0.00515257	0.0642013	-2.20585		C1qtnf6	5.08952	0.880907	3.3187	0.00429924	0.0535519	-3.11352
Fbxl8	1.74233	4.95995	3.12941	0.00641054	0.0797001	-2.20649		Myl12a	-0.387999	8.92436	-3.22923	0.00519412	0.0646451	-2.93074		6720489N17Rik	3.90832	1.40524	3.31826	0.00430324	0.0535519	-2.85022
Lsm14b	4.37927	-0.0322247	3.12937	0.00641106	0.0797001	-3.14908		Gas7	-5.49846	0.980611	-3.22667	0.00522224	0.0649211	-2.75461		Nuf2	4.19597	3.67958	3.3174	0.00431103	0.0535519	-2.47362
Aim1	-1.5311	6.05401	-3.12672	0.00644692	0.0800548	-2.29721		1110037F02Rik	0.707242	6.70073	3.22514	0.00523916	0.0650574	-2.37887		Cdca2	4.57315	2.82481	3.31723	0.00431261	0.0535519	-2.48519
Spock2	5.88941	-0.742176	3.12455	0.00647637	0.080329	-3.14635		Ywhaz	-0.289415	10.6086	-3.22249	0.00526852	0.0653476	-3.39783		Myl12a	0.388613	8.92436	3.31653	0.00431899	0.0535702	-2.59621
Tspan3	1.30596	5.62276	3.12384	0.00648612	0.0803587	-2.37953		Pde3b	0.944704	6.53437	3.2218	0.00527623	0.065369	-2.23669		Elf4	0.903951	6.92251	3.30963	0.00438253	0.0542967	-2.14955
Acss2	-1.57469	5.92125	-3.12102	0.0065247	0.0807126	-2.31293		Rnf115	-0.625124	7.12415	-3.22072	0.00528827	0.0654438	-2.51283		Tmem218	-5.02002	0.870295	-3.30874	0.00439071	0.0543363	-3.30583
Hsdl1	0.971409	6.38661	3.12067	0.00652948	0.0807126	-2.56135		Ttc39c	1.05471	5.92631	3.217	0.00532995	0.0658619	-2.19654		Gpr97	-4.31188	-0.416723	-3.30647	0.00441192	0.0545369	-3.06742
Cd81	1.21646	5.78306	3.11971	0.00654266	0.0807841	-2.51232		Cd6	0.907312	8.47763	3.21663	0.00533412	0.0658619	-2.7982		Kcnq5	-3.48732	2.79136	-3.30583	0.00441782	0.0545481	-2.66952
Dhrs3	2.15653	4.45945	3.11772	0.00657006	0.0810308	-2.20813		Slc38a2	-0.66162	7.22505	-3.21466	0.00535634	0.0660615	-2.50195		Serpinb6b	0.590548	7.08747	3.30427	0.00443243	0.0546667	-2.20757
Pppde1	1.02285	6.13152	3.11186	0.00665165	0.081921	-2.55931		Oas1g	3.00768	2.00407	3.21368	0.00536742	0.0660973	-2.73446		Egr1	1.50063	6.49319	3.30065	0.00446655	0.0550252	-1.97288
Clpb	0.957706	5.2242	3.11116	0.00666134	0.081921	-2.37508		Ppp2r5c	-0.370248	8.55137	-3.21333	0.00537135	0.0660973	-2.85832		Prune	1.34701	4.34775	3.29901	0.00448209	0.0551544	-1.89207
Tbl1xr1	0.733042	6.01148	3.11092	0.00666476	0.081921	-2.52018		Rpl12	0.401473	8.39193	3.2125	0.00538083	0.0661393	-2.80961		Chmp1b	-0.836627	6.49279	-3.29818	0.00448995	0.0551889	-2.1485
Il6st	1.83965	5.07549	3.10966	0.00668249	0.0820466	-2.24201		Rnf166	-0.742196	7.25887	-3.21157	0.00539132	0.0661937	-2.4183		Dtx3	-0.854453	6.62604	-3.295	0.00452021	0.0554143	-2.07037
Kif22	1.86869	5.40346	3.10799	0.00670593	0.0822418	-2.23217		Traf6	-1.08425	5.4217	-3.21068	0.00540144	0.0662435	-2.08806		Tmed3	0.95663	5.55593	3.29456	0.0045244	0.0554143	-1.92377
Card11	-1.12947	6.36881	-3.10565	0.006739	0.0825546	-2.52498		Plekhf1	-5.33081	3.44187	-3.21009	0.00540816	0.0662515	-2.68825		Camta2	-1.09132	5.43005	-3.29409	0.00452894	0.0554143	-1.91225
Wdr45l	-1.20666	5.44906	-3.10439	0.00675693	0.0826815	-2.38031		Ldhb	1.14096	5.71189	3.20883	0.00542256	0.0663241	-2.17233		Nucks1	1.05638	5.86592	3.29353	0.00453427	0.0554143	-1.97748
Atp10d	-1.65808	5.14357	-3.09881	0.00683658	0.0835624	-2.2714		Rasa1	1.09743	6.64012	3.20803	0.00543171	0.0663241	-2.42119		H1f0	-0.826735	6.38405	-3.29341	0.00453542	0.0554143	-2.00866
Rab5b	-0.596137	6.8584	-3.09452	0.00689853	0.0841602	-2.7774		Slc38a1	0.590838	7.49175	3.20784	0.00543397	0.0663241	-2.61366		Nfic	1.97702	3.8716	3.29215	0.00454756	0.0554143	-2.00074
Mif	0.477179	8.25875	3.09436	0.00690091	0.0841602	-3.0841		Gbp7	-0.582321	7.49769	-3.20745	0.0054384	0.0663241	-2.55419		Psmd8	0.482419	7.62281	3.29203	0.0045487	0.0554143	-2.33403
Gpr107	1.64133	4.72469	3.09306	0.00691971	0.0842954	-2.31682		Iqgap1	-0.467185	8.48023	-3.20402	0.00547794	0.0667319	-2.89395		Gbp3	1.19007	5.40658	3.29201	0.0045489	0.0554143	-1.90447
Gatsl3	1.29687	4.85704	3.09164	0.00694037	0.0844528	-2.33956		Fam53b	-0.85787	6.71744	-3.20206	0.00550062	0.0669216	-2.38748		Stx7	1.40529	5.09148	3.29099	0.00455866	0.0554408	-1.90213
E2f7	4.81597	1.13905	3.0885	0.00698632	0.0848088	-3.16123		Galm	3.76139	3.14079	3.20107	0.00551213	0.0669216	-2.39176		Cenpi	5.83009	1.18472	3.29073	0.00456123	0.0554408	-3.03412
Lrrc42	1.51258	4.66916	3.08824	0.00699018	0.0848088	-2.26821		Depdc1b	-3.86227	0.853505	-3.20095	0.00551348	0.0669216	-2.60616		Arg1	-4.72969	0.544493	-3.2893	0.00457502	0.0555466	-2.99089
Rps11	-0.312445	10.4278	-3.08805	0.00699294	0.0848088	-3.66562		Sp100	-0.370789	9.28185	-3.20056	0.00551804	0.0669216	-3.04875		Ints12	1.14105	5.3099	3.28678	0.00459946	0.0557813	-1.91123
Ndufc2	0.682311	6.36847	3.08457	0.00704434	0.0853374	-2.65253		Rhbdd2	1.74845	5.05888	3.19883	0.00553815	0.0670909	-2.07138		Sardh	-4.56456	0.93577	-3.28493	0.00461745	0.0559372	-3.40671
Dhx57	1.23289	5.15334	3.08293	0.00706863	0.0855321	-2.34926		Cks2	-0.794135	6.00118	-3.19797	0.00554829	0.0671392	-2.40907		Ptpn1	0.827536	6.70675	3.28317	0.00463465	0.0560834	-2.10746
Crip1	-0.620538	8.47326	-3.08243	0.00707609	0.0855321	-2.94342		Ndufs6	0.557287	6.829	3.19737	0.00555528	0.0671494	-2.49056		Eif4ebp2	1.23367	5.18049	3.28088	0.00465718	0.0562936	-1.92686
Zfp821	4.93912	0.547554	3.08146	0.00709043	0.0856107	-3.03028		Mtor	1.61917	4.93227	3.19549	0.00557735	0.0672174	-2.07924		Rnps1	0.55929	7.64872	3.27787	0.00468693	0.0565906	-2.37378
Pou2f2	3.07046	2.81539	3.077	0.00715718	0.0863211	-2.56889		Dus2l	0.86613	5.6888	3.19447	0.00558939	0.0672174	-2.21778		Lmnb1	1.41612	4.49383	3.27668	0.00469869	0.0566698	-1.95252
Bfar	-0.862606	6.41032	-3.07541	0.00718119	0.0863377	-2.64946		Hs1bp3	4.96111	1.09968	3.19441	0.0055901	0.0672174	-2.73677		Cyp51	4.18401	4.39618	3.27492	0.0047162	0.0567296	-2.29209
Acad9	0.959918	5.50039	3.07537	0.00718181	0.0863377	-2.44265		Plek	-4.26943	3.39389	-3.19438	0.00559045	0.0672174	-2.17737		Araf	-0.526821	7.31017	-3.27474	0.00471804	0.0567296	-2.29119
Tmem106a	1.79935	3.56414	3.07534	0.00718229	0.0863377	-2.31097		Scamp3	0.481877	8.03238	3.19427	0.0055917	0.0672174	-2.76934		Dnajb4	4.22312	0.623695	3.27441	0.00472129	0.0567296	-2.8846
Ept1	2.1176	4.19308	3.07303	0.00721717	0.0866526	-2.30259		Nat10	1.19074	5.85788	3.19357	0.00559999	0.067243	-2.19283		Klri1	4.35064	0.291968	3.2741	0.00472443	0.0567296	-2.96931
Ift80	3.67769	3.47816	3.07255	0.00722435	0.0866526	-2.60492		Adar	0.612019	7.17904	3.18925	0.00565123	0.0677837	-2.55351		Bst2	-0.938656	5.608	-3.2731	0.00473436	0.0567863	-1.9932
Bcl2l1	-0.826064	6.46657	-3.07061	0.00725397	0.0869054	-2.72091		Mgst2	0.833766	5.79853	3.18787	0.00566767	0.0679063	-2.2085		Oas2	-4.89222	0.00741505	-3.27234	0.00474202	0.0568157	-3.22932
Sqrdl	4.43187	1.01584	3.07012	0.00726136	0.0869054	-2.74946		Cdca5	-2.35627	2.0963	-3.18667	0.00568206	0.0679862	-2.11901		Lrmp	0.564549	7.62089	3.26984	0.00476714	0.0569151	-2.29434
Paip2	0.512529	8.55609	3.06827	0.00728971	0.0871491	-3.24602		Aldh7a1	4.51753	2.2392	3.18618	0.00568791	0.0679862	-2.6397		Bphl	-1.95424	4.69147	-3.26928	0.00477279	0.0569151	-2.07874
Tax1bp1	-0.554998	8.11383	-3.06558	0.00733088	0.0875455	-3.09478		Usp9x	0.717575	7.01403	3.1853	0.00569844	0.0679862	-2.54035		Ppp1ca	0.333445	9.79653	3.26916	0.00477395	0.0569151	-2.91339
Pcsk4	-5.162	1.50334	-3.06401	0.00735509	0.0877386	-3.05415		Shcbp1	-4.26456	2.29897	-3.18511	0.00570076	0.0679862	-2.33458		Slc35a5	-1.00376	5.62547	-3.26907	0.00477486	0.0569151	-1.99514
Cd163l1	-5.41007	-0.364013	-3.06295	0.00737157	0.0877588	-3.0627		Metap1	0.88874	5.79011	3.18472	0.00570548	0.0679862	-2.26954		Spata5l1	-3.36799	1.96897	-3.26892	0.00477638	0.0569151	-2.88952
Cenph	3.56362	3.2549	3.06249	0.00737856	0.0877588	-2.58351		Gpr107	1.88556	4.72469	3.18272	0.00572953	0.0681983	-2.1016		9130206I24Rik	4.81403	1.0919	3.26593	0.00480672	0.0572141	-3.10202
Atg4b	-0.812026	6.00601	-3.06234	0.00738091	0.0877588	-2.62643		Flt3l	-0.772352	6.71419	-3.18152	0.00574414	0.0682442	-2.42654		Dnahc8	4.49369	3.80778	3.26395	0.00482683	0.0573909	-2.67201
Ptgir	4.16658	2.66421	3.05872	0.00743728	0.0883329	-2.76128		Sorl1	-1.23872	5.51153	-3.18137	0.00574589	0.0682442	-2.18016		Pacsin1	-1.86539	5.04592	-3.26309	0.00483562	0.0574328	-1.97847
Ctla4	4.97552	3.31806	3.05797	0.0074489	0.0883747	-2.68575		6330512M04Rik	-0.916905	5.97867	-3.18058	0.00575551	0.0682842	-2.29896		Dhrs1	1.3813	5.61132	3.25975	0.00486981	0.0577761	-1.97282
1110008P14Rik	0.817384	5.7842	3.05687	0.00746619	0.0884837	-2.56653		Dennd1b	-1.42983	5.44868	-3.17973	0.00576576	0.0683314	-2.14309		Tbc1d19	-5.66824	0.420394	-3.25615	0.00490705	0.0581547	-3.36207
Zfp239	5.08439	-0.508017	3.04928	0.007586	0.0897882	-3.09636		Immt	-0.750894	7.00443	-3.17741	0.00579413	0.0685932	-2.52046		Zfp36l1	-0.455747	8.59703	-3.25528	0.00491602	0.0581797	-2.52214
Atxn3	1.5215	4.32674	3.04886	0.00759272	0.0897882	-2.3285		Slbp	-0.43259	8.13777	-3.17623	0.00580852	0.0686891	-2.85751		Trim34a	-0.899508	6.33192	-3.2545	0.00492415	0.0581797	-2.14272
Nek8	4.74907	2.40239	3.04701	0.00762222	0.0900147	-2.77569		Zmiz1	-1.03932	6.31016	-3.1739	0.00583711	0.0689524	-2.36102		Ndrg2	5.10631	2.11627	3.25383	0.0049312	0.0581797	-3.19224
Gm4532	3.98452	0.991294	3.04663	0.00762836	0.0900147	-3.06183		Aldh2	4.57326	0.138177	3.17129	0.00586924	0.069257	-2.95949		Commd8	-0.54772	7.13188	-3.25372	0.00493226	0.0581797	-2.31901
Ndufv3	-0.469067	7.37321	-3.04598	0.00763872	0.0900171	-2.96909		Gm19757	0.62287	6.7725	3.16902	0.00589744	0.0695146	-2.5368		Socs1	-0.775115	5.95551	-3.25338	0.00493581	0.0581797	-2.06935
Rad51l1	4.8635	1.43963	3.04558	0.00764507	0.0900171	-2.9394		Cd53	-0.35837	10.3081	-3.16787	0.00591176	0.0695263	-3.36487		Pde2a	-0.872351	7.45024	-3.25241	0.00494597	0.0582365	-2.43916
Ccnb1	3.83582	4.75197	3.04353	0.00767809	0.0903086	-2.50321		Gstm1	-5.06228	-0.284082	-3.16747	0.00591668	0.0695263	-3.05715		Pgm2	-0.998316	6.05451	-3.25177	0.0049527	0.0582529	-2.07791
Psma6	0.594137	7.77038	3.0402	0.00773184	0.0907051	-3.08684		Gfm2	1.04734	5.45721	3.16741	0.00591754	0.0695263	-2.20602		Mrpl33	0.56185	6.96043	3.25055	0.00496548	0.0583111	-2.28996
Zfp445	-1.72792	5.71894	-3.04008	0.00773375	0.0907051	-2.48855		Sytl1	-1.47659	5.28795	-3.16655	0.00592824	0.0695772	-2.13144		Dguok	-1.01688	6.94063	-3.25027	0.00496833	0.0583111	-2.21674
Rhoc	-1.54727	4.65416	-3.03872	0.00775596	0.0907051	-2.3513		Atp9b	1.2282	6.28781	3.166	0.00593513	0.0695831	-2.35826		Tespa1	-0.669782	7.61186	-3.24929	0.00497864	0.0583694	-2.37607
Trf	-4.30907	3.30386	-3.03868	0.00775665	0.0907051	-2.62472		Psmd9	1.06478	5.55928	3.16527	0.00594423	0.0696151	-2.23008		Slc35f2	-1.93468	4.13724	-3.24802	0.00499204	0.0583864	-2.09014
Ifi27l1	0.584534	7.35424	3.03845	0.00776026	0.0907051	-3.0137		2210417A02Rik	4.37602	-1.348	3.16301	0.0059726	0.0698723	-3.23851		Pole2	3.80342	2.53005	3.24798	0.00499251	0.0583864	-2.77435
Gsn	2.6102	4.35743	3.03817	0.00776482	0.0907051	-2.34777		Fam193a	1.66584	4.26409	3.16226	0.00598208	0.0699084	-2.14717		Adk	1.20364	5.72828	3.24763	0.00499614	0.0583864	-1.99431
2210404O09Rik	2.02609	2.8548	3.03786	0.00776997	0.0907051	-2.47272		Serp2	-4.43214	-1.20722	-3.16164	0.0059899	0.0699249	-3.17982		Abhd8	-0.790942	7.17104	-3.24648	0.00500831	0.058466	-2.26759
Dnase2a	1.81657	3.58142	3.03614	0.00779796	0.0907052	-2.35343		Chn2	0.613791	7.15077	3.15672	0.00605231	0.070578	-2.63435		Med21	0.893892	5.79656	3.24361	0.0050388	0.0587501	-2.05066
Thumpd1	-0.71707	6.48928	-3.0356	0.00780683	0.0907052	-2.78538		Plekhm2	5.1372	0.0257441	3.15617	0.00605928	0.0705839	-3.18006		Ndrg3	0.858321	6.19413	3.24317	0.00504342	0.0587501	-2.17203
Chsy1	-1.53256	5.88558	-3.03513	0.0078145	0.0907052	-2.45879		Erp29	0.737661	6.01718	3.1552	0.00607165	0.0706211	-2.3585		Slc7a6	0.705551	6.74443	3.24233	0.00505238	0.0587918	-2.20018
3110043O21Rik	5.3683	0.631216	3.0349	0.00781837	0.0907052	-3.04874		Tmem9	1.39598	4.82773	3.15491	0.00607542	0.0706211	-2.1514		Mtmr9	1.82987	4.27307	3.23979	0.00507956	0.0590108	-2.06389
Wbp5	1.06433	5.32204	3.03479	0.00782008	0.0907052	-2.46539		Klra7	-9.82475	4.29209	-3.15421	0.00608433	0.0706495	-2.72904		Slfn8	-1.09004	6.78487	-3.23956	0.00508202	0.0590108	-2.23492
S1pr4	-0.636199	7.23113	-3.03419	0.00782995	0.0907052	-2.83366		Itgae	-2.01553	4.13167	-3.15264	0.00610449	0.0708082	-2.15379		Psrc1	4.69465	-0.52147	3.2377	0.005102	0.0590994	-3.32119
Glt8d1	2.01836	3.70085	3.0331	0.00784793	0.0907052	-2.38366		Vrk3	-0.635646	7.05028	-3.1521	0.00611146	0.0708137	-2.61535		Cfp	5.03349	0.853996	3.23738	0.0051055	0.0590994	-3.371
Ninj1	1.82288	3.93801	3.03309	0.00784806	0.0907052	-2.3539		Pdlim1	-1.03281	6.50349	-3.15072	0.00612926	0.0709447	-2.46743		Abhd4	4.4935	2.9193	3.23734	0.00510589	0.0590994	-3.05036
Ddx28	1.44605	5.00612	3.03275	0.00785363	0.0907052	-2.42269		4930427A07Rik	-5.3472	2.96083	-3.14768	0.00616858	0.0713074	-2.53077		Psd4	-0.593128	7.80228	-3.23503	0.0051309	0.059326	-2.50621
Rapsn	4.82662	0.174081	3.03236	0.00786011	0.0907052	-3.10347		Oaf	6.30451	-0.531061	3.14711	0.00617607	0.0713074	-3.20719		Tpm3	0.294274	9.67021	3.23009	0.00518463	0.0598656	-2.95844
1190002F15Rik	2.30392	3.75309	3.03228	0.00786139	0.0907052	-2.53083		Sbk2	4.59792	-0.256839	3.14679	0.00618019	0.0713074	-3.00495		Bmyc	-2.33011	4.69074	-3.22955	0.00519061	0.0598656	-2.13903
Cdc42	-0.272992	10.2417	-3.02897	0.00791616	0.0912406	-3.68785		Egln3	5.3113	0.0969355	3.14525	0.00620029	0.0713382	-3.12603		Gm14005	1.88373	3.88862	3.22914	0.0051951	0.0598656	-2.18332
Gjb2	4.7652	-0.217391	3.02522	0.00797858	0.0917191	-3.04656		Ptgs1	-6.1213	0.598726	-3.14516	0.00620147	0.0713382	-3.02491		1700097N02Rik	2.242	3.53215	3.22874	0.0051995	0.0598656	-2.45688
Cdkal1	-0.820412	5.94617	-3.02504	0.00798154	0.0917191	-2.6291		Smarcal1	1.55442	4.47998	3.14508	0.00620247	0.0713382	-2.16222		Parp14	-1.1614	5.42464	-3.22682	0.00522057	0.0600448	-2.02869
Zfp90	-5.23249	0.156079	-3.02496	0.00798288	0.0917191	-3.1143		Bmp7	1.83529	5.0277	3.14275	0.006233	0.0715555	-2.18404		Lpin1	1.41381	5.1318	3.22572	0.00523268	0.0600587	-2.03392
Phf21a	-1.17612	5.5112	-3.02409	0.00799739	0.0917555	-2.47795		Usp28	-3.47856	2.98302	-3.14264	0.00623447	0.0715555	-2.47504		Hnrnpa2b1	0.321038	10.4416	3.22571	0.00523278	0.0600587	-3.18506
Erlin1	5.47762	0.831613	3.02377	0.00800287	0.0917555	-2.95449		Nek2	-1.54259	2.40599	-3.14004	0.00626866	0.0718723	-2.17921		Gimap1	-0.303975	9.3274	-3.22231	0.00527056	0.0604288	-2.8655
Mob3c	-1.27977	5.07629	-3.01638	0.00812762	0.0930524	-2.46347		Mast3	-0.863175	6.19053	-3.13538	0.00633044	0.0725045	-2.4001		Hspa5	-0.441092	9.54034	-3.21997	0.00529663	0.060547	-2.91948
Casp8	-0.525663	7.6366	-3.01607	0.00813303	0.0930524	-3.09273		Prim1	-0.919996	5.67939	-3.13439	0.00634367	0.0725798	-2.36158		Xpr1	-3.23019	3.09507	-3.21952	0.00530164	0.060547	-2.7144
Rab8a	-0.605987	7.69774	-3.01397	0.00816882	0.093364	-3.08101		Gimap7	-0.539065	8.56058	-3.13373	0.00635252	0.072605	-2.99829		Gab3	-1.14782	5.82607	-3.2194	0.00530302	0.060547	-2.16484
Cd2	-0.583273	8.72465	-3.01315	0.00818281	0.0934261	-3.30865		Glud1	-0.671313	7.07034	-3.13303	0.00636184	0.0726355	-2.63725		4831426I19Rik	5.27683	-0.0575016	3.21917	0.00530556	0.060547	-3.42784
Prdx2	0.508059	7.66597	3.01054	0.00822777	0.0937694	-3.14515		Sept5	-4.11773	-1.07723	-3.12925	0.00641264	0.073139	-3.18327		Mapk8ip3	-1.63772	4.54187	-3.2189	0.00530861	0.060547	-2.08336
Uggt1	0.922262	6.4663	3.0104	0.00823005	0.0937694	-2.77218		Rnf128	4.2818	2.42859	3.12866	0.00642055	0.0731527	-2.69257		Rpl27	-0.332946	9.70066	-3.21755	0.00532371	0.0606558	-2.99368
Gimap7	-0.51855	8.56058	-3.00932	0.00824884	0.0938208	-3.30926		E2f2	-4.43343	2.034	-3.12644	0.00645071	0.0734197	-2.56609		Rad21	0.942351	5.77599	3.21529	0.00534924	0.0608831	-2.11144
Pgam2	4.34443	-0.276218	3.00866	0.00826012	0.0938208	-3.10875		Iqgap2	-1.83865	4.8902	-3.12501	0.00647013	0.073564	-2.19483		Prkx	-0.716565	6.07407	-3.21449	0.00535824	0.0609221	-2.26613
Eif1	-0.316858	10.0989	-3.00769	0.00827705	0.0938208	-3.73736		Kdm3b	1.2466	5.11095	3.12408	0.00648285	0.0736319	-2.2211		Cirh1a	-0.943957	6.24196	-3.21298	0.00537535	0.061053	-2.17465
Sh2d3c	-0.500456	7.81156	-3.00767	0.00827738	0.0938208	-3.14472		Tnfrsf13b	2.16585	3.19248	3.12071	0.00652889	0.0740778	-2.43166		Uhrf1	4.95099	4.60008	3.21177	0.00538908	0.0611453	-2.50702
Slc16a5	4.79275	0.656349	3.00731	0.00828353	0.0938208	-3.26272		4930579G24Rik	-1.26753	4.68768	-3.11978	0.00654166	0.0741395	-2.24535		Pde4a	4.89247	0.841051	3.20996	0.00540965	0.0612355	-3.1458
Sept7	0.359946	8.94225	3.00716	0.00828614	0.0938208	-3.4436		Gimap1	0.301839	9.3274	3.11933	0.00654791	0.0741395	-3.23384		Ptpn13	-4.17062	3.35603	-3.20974	0.00541217	0.0612355	-2.89651
Tti1	1.83251	5.31816	3.00538	0.0083171	0.0940397	-2.53335		Ankrd46	1.26383	5.50059	3.11753	0.00657275	0.0743018	-2.38954		4930547N16Rik	5.2229	0.951736	3.20959	0.00541386	0.0612355	-3.17361
Hmgb2	0.40448	9.54879	3.00506	0.00832271	0.0940397	-3.45882		Srsf1	-0.694937	7.74278	-3.11727	0.00657633	0.0743018	-2.84059		Lpcat3	-0.905324	6.375	-3.20878	0.00542317	0.0612773	-2.22498
4833439L19Rik	0.838405	6.39124	2.99969	0.0084168	0.0950045	-2.73527		Grwd1	1.13342	4.82654	3.11666	0.00658471	0.0743018	-2.24308		Anp32b	0.662474	7.42536	3.20777	0.00543478	0.061345	-2.44794
Zfp41	2.28927	3.10592	2.99883	0.00843187	0.0950763	-2.54445		Car5b	-2.62116	3.50101	-3.11632	0.00658948	0.0743018	-2.29091		Rltpr	-1.14319	5.45952	-3.20465	0.00547061	0.0616228	-2.0701
Mtmr12	0.668346	6.62126	2.99801	0.00844643	0.0951421	-2.88435		Rilpl1	4.43566	-0.843261	3.11386	0.00662373	0.074611	-3.16671		Vdac3	0.675258	7.28139	3.20426	0.00547509	0.0616228	-2.45068
1110038F14Rik	-0.730531	6.0045	-2.99653	0.00847265	0.0952984	-2.71727		F630043A04Rik	-2.6912	2.65525	-3.11203	0.00664915	0.0748201	-2.31596		Rcn1	1.09288	5.25704	3.20326	0.00548668	0.0616228	-2.10729
Nanos1	5.60698	1.47675	2.99595	0.00848289	0.0952984	-2.8716		Rrs1	-1.05121	5.12451	-3.11101	0.00666343	0.0748271	-2.25512		Chmp6	0.878044	5.66144	3.20314	0.0054881	0.0616228	-2.10955
Inpp5d	-0.522814	7.91219	-2.99575	0.00848649	0.0952984	-3.21669		Hcst	-0.374433	8.74703	-3.11101	0.00666349	0.0748271	-3.05837		Ncapg2	4.50995	3.17028	3.20269	0.00549325	0.0616228	-2.47501
2210408F21Rik	4.50403	-1.37212	2.99492	0.00850124	0.095366	-3.28221		Slfn2	0.374055	9.18628	3.109	0.00669176	0.0749824	-3.22525		Insl6	3.8209	3.37663	3.20269	0.00549327	0.0616228	-2.6604
Ccna2	3.94457	5.07571	2.98666	0.00864939	0.0969282	-2.55726		Tmod3	-0.797227	7.47492	-3.10838	0.00670051	0.0749824	-2.76256		4930427A07Rik	4.53826	2.96083	3.20095	0.00551347	0.061786	-2.48035
Polr3f	-2.78267	4.13662	-2.98536	0.00867289	0.096999	-2.46807		Ptp4a3	-0.653168	6.91808	-3.10791	0.00670703	0.0749824	-2.65431		Smtn	4.95434	1.88243	3.19876	0.00553908	0.0620092	-3.16617
Dync1li1	-0.796866	6.18028	-2.98533	0.00867348	0.096999	-2.75965		Itm2a	-1.33433	5.82241	-3.10788	0.00670748	0.0749824	-2.49256		Itga2	4.20319	1.59374	3.1981	0.00554672	0.0620163	-2.61248
Mtap	-0.801691	6.11787	-2.98138	0.0087454	0.0977033	-2.74244		Adprh	-0.654242	6.93481	-3.10758	0.00671166	0.0749824	-2.69452		Pfkm	-2.09111	4.0859	-3.19773	0.00555107	0.0620163	-2.26229
Vhl	1.6998	4.47345	2.98033	0.00876477	0.0977594	-2.44659		Klhl4	4.62416	2.53556	3.10636	0.00672892	0.0750983	-2.83226		Pisd-ps1	-0.622687	7.28285	-3.19636	0.00556717	0.0621063	-2.39629
Iigp1	2.97161	4.72617	2.98013	0.00876834	0.0977594	-2.46029		Agps	-1.3536	5.4058	-3.10463	0.00675342	0.0752947	-2.29911		Dhx15	1.02828	5.88788	3.19607	0.00557051	0.0621063	-2.15502
Ptpn1	0.769735	6.70675	2.97956	0.00877887	0.0977769	-2.87506		Rgs2	-1.77751	4.81437	-3.10134	0.00680032	0.0757402	-2.23677		Add3	0.788421	7.23581	3.19546	0.00557772	0.0621233	-2.48757
Gm11648	2.10738	3.78139	2.97574	0.00884913	0.0984589	-2.53102		Psen1	0.592502	7.29494	3.09924	0.0068305	0.0759815	-2.76394		Ptpn7	-0.467708	9.34164	-3.19418	0.00559285	0.0621934	-2.89367
Arhgap18	-0.924266	6.35034	-2.97449	0.0088724	0.0985332	-2.83163		Hivep3	2.07786	3.99906	3.09805	0.00684753	0.0759815	-2.24136		Gzmm	4.65994	0.891751	3.19396	0.00559541	0.0621934	-3.15104
Luc7l	-0.641177	6.24655	-2.97407	0.00888012	0.0985332	-2.85781		Zc3h12d	1.50603	3.99547	3.09799	0.00684837	0.0759815	-2.25436		Srebf2	1.14178	5.52692	3.19336	0.00560244	0.0622081	-2.10471
Flna	0.734038	8.09594	2.97327	0.00889498	0.0985332	-3.19361		Rpl5	-0.278358	11.1082	-3.09754	0.00685488	0.0759815	-3.76884		Ezr	0.646533	8.04252	3.19263	0.00561113	0.0622343	-2.62057
Mtch2	0.519167	7.35862	2.97311	0.00889806	0.0985332	-3.10952		Sdcbp	-0.483194	9.29634	-3.09741	0.00685678	0.0759815	-3.30147		Usp1	0.758616	6.33187	3.1922	0.00561619	0.0622343	-2.2832
Thnsl1	-6.078	-0.870154	-2.97255	0.00890834	0.0985332	-3.2537		Rfc4	-1.15001	4.86521	-3.0951	0.0068901	0.0762059	-2.34081		Blcap	-1.74886	4.1792	-3.19038	0.00563778	0.0624101	-2.25209
Ccm2	0.547152	7.71574	2.97238	0.00891151	0.0985332	-3.19959		Brip1	-1.57193	3.63858	-3.09504	0.006891	0.0762059	-2.25583		Tfdp1	1.09519	6.23867	3.18815	0.00566442	0.0626415	-2.20941
Bard1	4.24395	0.872516	2.97198	0.00891899	0.0985332	-3.18893		Sdhb	-0.461938	8.15689	-3.09288	0.00692239	0.0764756	-3.02403		E2f3	-2.65998	3.22716	-3.18549	0.00569621	0.0628926	-2.54603
1700037C18Rik	4.31865	0.650139	2.96903	0.00897431	0.099044	-3.21142		Cited4	-4.58377	1.45722	-3.0915	0.00694244	0.0766195	-3.17745		Sumo3	0.683998	7.14565	3.18529	0.00569865	0.0628926	-2.4552
Ttc9c	-0.677766	6.21251	-2.96808	0.00899204	0.0991395	-2.82556		Cr1l	-0.923729	7.0263	-3.08878	0.00698234	0.076883	-2.71636		Metrnl	3.87142	1.28436	3.1811	0.00574917	0.0633861	-2.68092
Ggt7	3.8985	0.395879	2.96581	0.00903478	0.0995102	-2.88256		Psmb10	-0.512892	8.26996	-3.08869	0.00698362	0.076883	-3.02654		Rcc1	0.985018	5.45524	3.18023	0.00575978	0.0634349	-2.14183
Nrg4	4.54692	-0.916497	2.96287	0.00909042	0.100022	-3.22175		Nck2	-1.50781	4.84969	-3.08779	0.00699687	0.076883	-2.25956		D030056L22Rik	-0.990088	5.32661	-3.17978	0.00576522	0.0634349	-2.14045
Cdc42ep3	-0.53031	6.97704	-2.96132	0.00911992	0.100123	-3.00629		Rltpr	1.136	5.45952	3.08764	0.00699908	0.076883	-2.34168		Tjap1	1.92727	3.927	3.17928	0.00577131	0.0634379	-2.15139
Zbtb5	2.58505	3.53074	2.96124	0.00912155	0.100123	-2.57448		H2-Q6	-0.502155	7.80166	-3.08747	0.00700153	0.076883	-2.91528		Hectd1	-0.576051	7.34347	-3.17853	0.00578039	0.0634738	-2.49184
Aif1	4.48716	0.335587	2.96094	0.00912713	0.100123	-3.25929		2010012O05Rik	-1.83973	4.52491	-3.08648	0.00701607	0.0768923	-2.26176		H3f3a	0.374155	9.40817	3.17788	0.00578833	0.0634971	-2.97636
Acly	0.636136	8.25904	2.9602	0.00914128	0.100178	-3.3469		Tmem135	1.04347	6.00528	3.08577	0.00702659	0.0768923	-2.45485		1300014I06Rik	-4.88918	0.58159	-3.17503	0.00582316	0.063815	-3.00665
Rbm24	-5.78782	-1.00626	-2.95895	0.00916525	0.100268	-3.24917		Gatsl3	1.40232	4.85704	3.0854	0.007032	0.0768923	-2.29717		Atp2b1	-0.521624	7.5039	-3.17391	0.00583701	0.0638652	-2.58285
Rad50	-0.908667	5.68662	-2.95843	0.00917522	0.100268	-2.67011		Tacc3	-2.16725	5.4674	-3.0853	0.00703354	0.0768923	-2.41104		Lmf2	2.05142	5.70252	3.17371	0.00583943	0.0638652	-2.15941
Cript	-0.617553	6.96518	-2.9581	0.00918149	0.100268	-2.99343		Mosc2	0.745078	6.54068	3.08469	0.00704256	0.0768923	-2.59377		Rnase4	-4.19239	3.46924	-3.17127	0.00586955	0.0641303	-2.9003
5830416I19Rik	4.47471	0.625976	2.95785	0.00918628	0.100268	-3.13784		Cpsf4	-0.940401	5.31573	-3.08455	0.00704464	0.0768923	-2.35532		Foxp1	0.505555	7.28571	3.1689	0.00589892	0.0643867	-2.53992
Golm1	-2.18159	5.41636	-2.95572	0.00922726	0.100615	-2.48846		Acot13	0.876377	5.88087	3.08296	0.0070681	0.0770573	-2.44281		Alcam	5.06274	0.816553	3.16677	0.00592543	0.0646115	-3.46699
Tmtc4	-3.7837	2.77896	-2.95369	0.00926657	0.100943	-2.6973		Clk3	-0.680499	6.97779	-3.08258	0.00707389	0.0770573	-2.70228		Casc5	4.51755	3.21309	3.16371	0.00596385	0.0649655	-2.55478
Entpd1	-1.76011	5.71382	-2.95132	0.00931237	0.10134	-2.60538		Tsga10	-5.53282	-0.983129	-3.08077	0.00710083	0.0771798	-3.27345		Pdlim4	4.03938	0.290201	3.16189	0.00598668	0.0651491	-2.90431
Arl4a	0.845588	5.79852	2.95007	0.00933683	0.101505	-2.76762		Galns	1.77114	4.60028	3.08057	0.00710371	0.0771798	-2.27876		Nr4a1	4.39794	5.26603	3.16076	0.00600097	0.0652396	-2.29218
Epcam	5.47634	-0.0474861	2.94955	0.00934697	0.101515	-3.21989		C330027C09Rik	-3.82933	1.51766	-3.0804	0.00710634	0.0771798	-2.57289		Zfp128	-5.41067	-0.11333	-3.1539	0.00608836	0.0661013	-3.43442
Mpp5	-3.91523	2.45256	-2.94893	0.00935904	0.101532	-2.8556		Rnaseh2b	-0.956943	5.32354	-3.07742	0.00715086	0.0775861	-2.40148		Pddc1	-0.764312	6.20384	-3.15359	0.00609234	0.0661013	-2.27816
Gm885	5.02133	0.823838	2.94846	0.0093682	0.101532	-3.13538		Scml4	-2.29609	5.12675	-3.07655	0.00716402	0.0776518	-2.28709		Abcg3	-1.0406	5.72576	-3.15275	0.00610306	0.0661518	-2.24672
Rtn4rl1	-2.58517	3.97142	-2.94804	0.0093765	0.101532	-2.61281		Pak1	5.06189	1.03202	3.07402	0.00720211	0.0779872	-3.21173		Nusap1	5.26402	4.31944	3.15188	0.00611425	0.0661571	-2.49076
Slc41a1	1.62023	4.53176	2.94671	0.0094026	0.101714	-2.52763		Gga1	-0.937633	5.6583	-3.07293	0.00721863	0.0780516	-2.43034		Alkbh6	-0.8864	5.92107	-3.15177	0.00611567	0.0661571	-2.23487
Ccnb2	1.79028	5.79861	2.94192	0.00949708	0.102634	-2.52539		2310044G17Rik	-1.47873	5.23724	-3.07269	0.00722237	0.0780516	-2.38148		Gen1	3.84698	1.62481	3.15117	0.00612341	0.0661602	-3.11935
Mansc1	-1.51978	3.77152	-2.93916	0.00955187	0.103034	-2.51466		Hint2	1.14461	5.4432	3.06967	0.00726825	0.0784697	-2.36049		Zcwpw1	-3.29275	2.83566	-3.15081	0.00612808	0.0661602	-2.81006
Dctpp1	1.40435	4.8632	2.93911	0.00955294	0.103034	-2.54428		Cd99l2	2.54971	3.33053	3.06897	0.00727889	0.078507	-2.50293		Prr5l	4.0866	-0.184298	3.14731	0.00617346	0.0665421	-3.38001
Skp1a	0.390177	8.79226	2.93851	0.00956483	0.103038	-3.56602		As3mt	-4.08267	2.72707	-3.0685	0.00728615	0.0785078	-2.58128		Dld	1.00116	6.39312	3.14681	0.00617993	0.0665421	-2.32451
Cd48	-0.532934	9.11299	-2.93814	0.00957224	0.103038	-3.49184		2010002N04Rik	4.38263	2.02764	3.06782	0.00729655	0.0785423	-2.73159		Slc18a2	-3.4949	2.53725	-3.14667	0.00618174	0.0665421	-2.83238
Vbp1	-0.632995	7.1847	-2.93619	0.00961126	0.103308	-3.09985		Gjb2	5.09458	-0.217391	3.06581	0.00732737	0.0787963	-3.17558		Ehbp1l1	0.716459	6.26405	3.14617	0.00618825	0.0665466	-2.36205
Zdhhc7	-0.862974	5.78289	-2.93594	0.00961619	0.103308	-2.73067		Gng11	-4.32613	-0.811139	-3.065	0.00733986	0.0788529	-3.11857		Cd6	-0.871626	8.47763	-3.14537	0.00619875	0.0665939	-2.78794
Cfp	4.69094	0.853996	2.93524	0.00963041	0.103359	-3.25792		Arap3	-3.80845	2.55743	-3.06202	0.00738593	0.0792699	-2.64425		Kif15	1.81815	4.48271	3.14328	0.00622599	0.0667908	-2.25009
Lcn4	-4.52309	1.12603	-2.93442	0.00964682	0.103433	-3.12592		Smpd1	-1.11754	5.75515	-3.06076	0.00740544	0.0794011	-2.42712		Klhl11	4.27234	0.510047	3.14303	0.00622932	0.0667908	-3.32829
2610528E23Rik	1.47471	3.94601	2.93164	0.00970286	0.103932	-2.52797		5430417L22Rik	1.09109	5.76673	3.0592	0.00742971	0.0795832	-2.46215		Pde11a	-3.16094	2.21695	-3.13765	0.00630031	0.0674856	-3.00335
Dennd1a	2.11625	3.72515	2.92511	0.00983586	0.105151	-2.57903		Ncapg2	-4.86637	3.17028	-3.05221	0.00753954	0.0806404	-2.58903		Mis18bp1	4.81382	2.50466	3.13462	0.00634061	0.0678508	-2.83755
Tasp1	-1.00798	5.70649	-2.9249	0.00984025	0.105151	-2.88167		Zfp599	4.82493	2.09212	3.05195	0.00754361	0.0806404	-2.89195		Wdr6	-0.925516	6.29731	-3.13371	0.00635279	0.0679145	-2.31626
Tcf3	-0.659321	7.06693	-2.92464	0.00984555	0.105151	-3.08587		Zfp239	5.18327	-0.508017	3.05151	0.00755057	0.0806404	-3.21145		Ctnnb1	0.771958	6.42251	3.13231	0.00637152	0.0680174	-2.38119
Mpp2	6.3341	-1.38155	2.92342	0.00987064	0.105284	-3.2843		L1cam	-3.62092	2.01053	-3.04939	0.00758428	0.0809213	-2.60092		Bahd1	4.33936	0.187231	3.13206	0.00637488	0.0680174	-3.39505
Smarcc1	0.8124	6.37499	2.9231	0.00987727	0.105284	-2.95376		Ypel5	0.590078	7.22442	3.04855	0.00759767	0.0809849	-2.83087		Xrcc4	-1.85725	4.84529	-3.1292	0.00641332	0.0683064	-2.197
Naa10	0.676671	7.02404	2.9221	0.00989783	0.1054	-3.12628		Tiparp	-1.41129	4.26525	-3.04803	0.00760599	0.0809945	-2.33433		Nfkb2	-0.814877	6.52101	-3.12911	0.00641448	0.0683064	-2.39497
Traf1	0.534117	7.30139	2.9168	0.0100079	0.10631	-3.24841		Nup153	0.765937	6.17921	3.04711	0.00762062	0.0810712	-2.64816		Padi2	-0.810266	5.39392	-3.12652	0.0064496	0.0686135	-2.40329
Pcyox1l	5.02037	1.65721	2.91661	0.0100118	0.10631	-3.14803		Hmg20b	1.10643	5.04318	3.0459	0.00764005	0.0811248	-2.36531		Usp35	5.16992	-1.12978	3.12531	0.00646605	0.068721	-3.54244
Rnf130	-3.05839	3.66398	-2.91658	0.0100125	0.10631	-2.71096		Stk11	3.66462	2.65689	3.04587	0.00764053	0.0811248	-2.78074		Rps24	-0.395642	9.71303	-3.12485	0.0064723	0.068721	-3.1924
Echs1	1.05195	5.87319	2.91531	0.0100391	0.106488	-2.79403		Arl5a	-1.67728	4.9454	-3.04254	0.00769409	0.0816142	-2.37157		Lta	-2.04732	4.94245	-3.12004	0.00653816	0.0693528	-2.27412
Rarg	-3.47425	4.3425	-2.91435	0.0100591	0.106597	-2.58573		Cript	-0.63703	6.96518	-3.04004	0.0077345	0.0819483	-2.77537		Cirbp	-0.937942	6.71742	-3.11673	0.0065838	0.0697691	-2.44904
Snx3	0.365128	8.06318	2.91363	0.0100742	0.106654	-3.39999		Sf3a1	0.666107	6.89322	3.03966	0.00774061	0.0819483	-2.77718		Cenpn	4.26082	2.78168	3.11376	0.006625	0.0701376	-3.00476
Marcks	5.7534	-0.885474	2.91243	0.0100994	0.106681	-3.32996		Gpr183	0.802121	6.52356	3.03869	0.00775645	0.0819875	-2.78954		Fbxl8	1.68686	4.95995	3.11293	0.00663666	0.070193	-2.21807
Rpl10	-0.33154	10.2729	-2.91213	0.0101058	0.106681	-4.00073		Bub1	-2.56875	2.3382	-3.03851	0.00775933	0.0819875	-2.42556		Id3	1.18251	6.19079	3.11185	0.00665177	0.0702718	-2.218
Atat1	3.95098	2.03983	2.91211	0.0101061	0.106681	-3.03145		Eri2	-2.69611	3.19138	-3.03781	0.00777077	0.082029	-2.59738		Pak1	-5.02855	1.03202	-3.11147	0.00665699	0.0702718	-3.43744
Usp6nl	5.07053	0.652898	2.90935	0.0101644	0.107193	-3.15957		2010106G01Rik	-0.754404	6.6727	-3.0371	0.00778233	0.0820716	-2.72312		C1qb	4.90108	1.23166	3.11021	0.00667465	0.0703779	-3.43617
Rell2	-4.1023	-0.921539	-2.90696	0.0102152	0.107531	-3.32651		Elovl5	-0.665787	7.27545	-3.03652	0.00779172	0.0820914	-2.88661		Trpm6	-4.32897	2.04067	-3.10963	0.00668291	0.0703779	-2.93273
Abi2	1.43628	4.70615	2.90691	0.0102161	0.107531	-2.64952		Ergic1	0.816925	5.77772	3.03447	0.00782527	0.0823355	-2.52653		Plk1	2.50058	4.68091	3.10938	0.00668639	0.0703779	-2.25111
Irgm2	-0.766349	6.71608	-2.90461	0.0102653	0.107944	-3.04136		Slc35c2	0.806067	6.26561	3.03419	0.00782998	0.0823355	-2.61138		Pqlc3	1.21732	5.98012	3.10837	0.00670058	0.0704593	-2.27855
Arap1	1.04943	5.99058	2.90397	0.0102789	0.107983	-2.90842		Micu1	1.08497	5.82358	3.03352	0.00784097	0.0823717	-2.54869		A230065H16Rik	6.01895	0.143747	3.10466	0.00675305	0.0707901	-3.40915
Jtb	-0.62282	6.7761	-2.90173	0.0103269	0.108383	-3.09478		Mis18bp1	-4.2879	2.50466	-3.02706	0.0079478	0.0833923	-2.63201		Rnmt	1.06418	5.55061	3.10389	0.00676402	0.0707901	-2.26305
Fkbp3	-0.466634	6.95165	-2.90051	0.0103532	0.108555	-3.1693		Phip	0.776235	6.51571	3.02673	0.0079534	0.0833923	-2.75139		Dapk2	1.58125	2.85159	3.10369	0.00676682	0.0707901	-2.24896
Azi2	-0.606936	7.41585	-2.89807	0.0104061	0.109004	-3.23457		Ddx28	1.25247	5.00612	3.02603	0.00796508	0.0834346	-2.46937		Efcab9	4.74246	-0.924921	3.10358	0.00676839	0.0707901	-3.53957
Cdkn2c	1.12684	4.92584	2.89525	0.0104674	0.109504	-2.67259		E030024N20Rik	-0.39088	8.3127	-3.02208	0.00803123	0.0840469	-3.20071		Ywhaz	0.268429	10.6086	3.10327	0.00677278	0.0707901	-3.49287
Sh3rf1	2.22949	3.66166	2.89495	0.0104738	0.109504	-2.59644		Upf3b	0.981188	5.09571	3.01994	0.00806729	0.0842525	-2.42938		Tcea1	-0.452237	7.64881	-3.10317	0.00677427	0.0707901	-2.73251
Prkce	-5.54413	-0.520306	-2.8926	0.0105253	0.10987	-3.32598		Abi2	1.54063	4.70615	3.01961	0.0080729	0.0842525	-2.40845		Gins2	1.99256	3.39985	3.10295	0.00677743	0.0707901	-2.50969
Rftn1	-0.64246	7.05499	-2.89232	0.0105314	0.10987	-3.19081		Top2b	-0.652949	7.41531	-3.01935	0.00807722	0.0842525	-2.94995		Egr3	3.71659	0.53365	3.10159	0.00679681	0.0709247	-3.46758
Abhd15	-5.17706	1.33425	-2.89197	0.0105391	0.10987	-3.20159		Gipc1	0.807478	5.66007	3.01909	0.00808175	0.0842525	-2.58766		Ccdc107	-0.958389	5.33262	-3.10043	0.0068134	0.0710299	-2.26225
Aldoa	-0.296917	9.51594	-2.89019	0.0105782	0.11006	-3.8644		Kif20b	-1.29201	4.86269	-3.01831	0.0080949	0.084309	-2.43819		Thoc6	2.73826	4.40393	3.09861	0.00683953	0.0711863	-2.40497
1700106N22Rik	2.13248	3.09936	2.88962	0.0105907	0.11006	-2.69914		Zfp961	-1.84508	4.92487	-3.01751	0.00810852	0.0843704	-2.38293		D16Ertd472e	-0.632948	6.56599	-3.09847	0.00684145	0.0711863	-2.62929
Sugp1	-0.922649	5.89414	-2.88957	0.0105917	0.11006	-2.88363		Senp2	-1.02934	5.84431	-3.01413	0.00816617	0.0848892	-2.56451		Prkd3	-1.00002	6.34251	-3.09801	0.00684817	0.0711884	-2.50547
Cyp4v3	4.14619	2.78357	2.88922	0.0105995	0.11006	-2.81867		Azi2	-0.628823	7.41585	-3.01361	0.00817498	0.0849	-2.95193		Fam49b	0.430818	8.21048	3.09555	0.00688362	0.0714888	-2.88752
Baiap3	1.55717	5.81708	2.88875	0.0106099	0.11006	-2.69564		Rnf130	-3.14841	3.66398	-3.01037	0.0082307	0.0853974	-2.63676		Psmd5	-0.813789	6.8138	-3.09369	0.00691066	0.0715637	-2.54241
Wdr24	1.31138	5.67482	2.88839	0.0106177	0.11006	-2.81289		Plk1	-1.96255	4.68091	-3.00707	0.00828778	0.0858516	-2.4407		Zfp36l2	-0.914322	7.37937	-3.09346	0.00691399	0.0715637	-2.72877
Ptpn13	1.38172	3.35603	2.88702	0.0106481	0.110184	-2.69539		Rnpc3	-1.20358	5.48907	-3.00664	0.00829511	0.0858516	-2.48068		Ntan1	0.853956	6.21538	3.09261	0.00692636	0.0715637	-2.41069
Gpx4	-0.45257	7.91537	-2.88694	0.0106499	0.110184	-3.41968		Mad2l1	-1.29205	5.34863	-3.00647	0.00829807	0.0858516	-2.66541		Fam3c	-0.650453	6.96235	-3.09205	0.00693449	0.0715637	-2.56708
Fbxl12	-1.67701	4.30075	-2.88648	0.0106602	0.110185	-2.60547		Ubl4	-0.968944	6.24915	-3.00355	0.00834902	0.0862408	-2.69797		Ctnnbip1	4.91439	0.449686	3.09154	0.00694189	0.0715637	-3.53841
Ccrl2	-2.24964	4.07516	-2.88477	0.0106981	0.110324	-2.61671		Casp7	-1.42958	5.47265	-3.00341	0.00835149	0.0862408	-2.48901		Sh3bgrl	0.907503	7.03555	3.09153	0.00694197	0.0715637	-2.57258
Pik3cd	-0.650763	8.0013	-2.88464	0.0107011	0.110324	-3.40724		Prkch	0.650757	7.97708	3.00192	0.00837757	0.0863095	-3.19092		Dnaja1	-0.498889	8.55917	-3.0915	0.00694251	0.0715637	-2.96125
Arhgap19	4.87127	1.90508	2.88451	0.0107039	0.110324	-3.28755		Tgif1	2.0863	3.48936	3.00176	0.00838043	0.0863095	-2.46165		Gm5141	2.58766	3.1528	3.09144	0.00694328	0.0715637	-2.56383
Inpp5f	1.72599	4.43732	2.88297	0.0107382	0.110573	-2.62492		Usp1	-0.776109	6.33187	-3.00168	0.00838187	0.0863095	-2.73231		Snai3	-2.17714	3.44406	-3.09084	0.00695212	0.0715871	-2.34001
Ints12	1.02758	5.3099	2.8821	0.0107577	0.110669	-2.73262		Slc25a24	-0.952736	5.84331	-3.00086	0.00839616	0.0863752	-2.71715		Echs1	1.10071	5.87319	3.08983	0.00696684	0.0716711	-2.3281
Dock5	-3.45385	4.47862	-2.8816	0.010769	0.110681	-2.71149		Agpat5	-1.06511	5.42004	-2.99871	0.008434	0.0866827	-2.50464		Zfp932	1.42388	5.29965	3.08849	0.00698659	0.0717949	-2.29764
Itga1	-3.27147	4.2859	-2.88078	0.0107872	0.110745	-2.80917		Fkbp2	-1.06656	5.15112	-2.99694	0.00846537	0.0869233	-2.49874		Rfc2	0.54665	7.01895	3.08812	0.00699203	0.0717949	-2.60402
Msl3l2	4.15953	1.21889	2.87973	0.0108108	0.110745	-2.90918		Camk4	0.642561	7.05594	2.99586	0.0084845	0.0870379	-2.91115		Klraq1	2.60345	3.48124	3.08745	0.00700175	0.0718271	-2.75606
Gphn	3.50122	2.16163	2.87938	0.0108186	0.110745	-2.97136		Mina	-1.04897	5.36926	-2.99508	0.00849842	0.0870988	-2.51943		Arxes2	-4.38392	1.22955	-3.08606	0.00702227	0.07197	-3.48894
Nfkbiz	0.805451	5.65723	2.87919	0.0108231	0.110745	-2.83435		Wasf2	-0.887542	6.32869	-2.9873	0.00863791	0.0884022	-2.7529		Rarg	-2.0956	4.3425	-3.08478	0.00704122	0.0720395	-2.26592
Klre1	-6.78651	4.42462	-2.87906	0.010826	0.110745	-3.07151		Aldoa	0.33399	9.51594	2.98708	0.00864179	0.0884022	-3.52569		Usp28	2.66573	2.98302	3.08471	0.00704225	0.0720395	-2.4983
Asap2	-3.70532	2.10592	-2.87622	0.0108902	0.111267	-2.9823		2210404O09Rik	2.0273	2.8548	2.9866	0.00865058	0.0884093	-2.60356		Pdp1	2.41674	4.02308	3.08303	0.00706709	0.072175	-2.49242
Ptcd1	3.45739	3.34094	2.8759	0.0108973	0.111267	-2.74673		Il17ra	-0.805022	6.51304	-2.98595	0.0086622	0.0884452	-2.83744		Peg13	-1.70978	5.28358	-3.08292	0.00706872	0.072175	-2.27029
Slc35a5	-0.8901	5.62547	-2.87511	0.0109152	0.111304	-2.88483		Ergic3	0.584887	6.98501	2.98485	0.00868224	0.0885669	-2.92498		Eea1	2.16092	4.59342	3.0815	0.00708996	0.0722968	-2.48588
Vprbp	-1.1228	5.20304	-2.87484	0.0109213	0.111304	-2.75143		Gm2382	0.852087	5.57293	2.98205	0.00873329	0.088915	-2.60946		Rfwd3	1.31864	5.97858	3.08111	0.00709573	0.0722968	-2.35825
Oip5	4.66338	1.64266	2.87353	0.0109512	0.111396	-3.23913		Ywhah	-0.404458	8.79762	-2.98133	0.00874641	0.088915	-3.43298		Alas2	4.47241	-1.29357	3.08079	0.00710052	0.0722968	-3.59615
Aff3	1.99824	3.98666	2.87328	0.0109569	0.111396	-2.62518		Tmem66	-0.423958	8.60834	-2.9812	0.00874869	0.088915	-3.36168		1700020I14Rik	0.994711	5.87013	3.07949	0.00711995	0.0723998	-2.3963
Mri1	-0.686288	6.24965	-2.8731	0.010961	0.111396	-3.04129		Edc3	1.12018	5.50995	2.98119	0.00874894	0.088915	-2.5785		Ptgir	4.15728	2.66421	3.07922	0.00712391	0.0723998	-3.07333
Supt5h	-0.461264	7.56292	-2.87207	0.0109845	0.111531	-3.36522		Pld4	-4.73992	-1.59345	-2.97815	0.00880473	0.0893677	-3.40054		Sla	-0.32961	8.75463	-3.07789	0.00714381	0.0725346	-3.09432
Gnptab	1.07785	5.33771	2.8714	0.0109998	0.111583	-2.75564		Socs2	-3.74789	4.01323	-2.97787	0.00880986	0.0893677	-2.79975		Chaf1b	1.3119	5.00029	3.0745	0.00719487	0.0729365	-2.28229
Dclre1a	-4.82262	2.15512	-2.8703	0.0110249	0.111734	-3.09088		Chst12	-0.840116	5.55787	-2.97743	0.00881809	0.0893681	-2.60076		Sgol1	4.38341	2.2703	3.07415	0.00720013	0.0729365	-2.88956
Kif18a	5.25537	1.34495	2.86944	0.0110446	0.11174	-3.29993		Wdr1	-0.257989	9.82938	-2.97421	0.00887755	0.0898872	-3.69473		Pfkp	0.576571	8.41023	3.07393	0.00720344	0.0729365	-2.92122
Pgam5	-0.950269	6.23403	-2.86938	0.0110461	0.11174	-3.01474		Sulf2	-3.96396	2.82903	-2.97354	0.00888993	0.0899292	-2.88793		Pygb	1.1451	6.37732	3.07301	0.0072175	0.0729554	-2.43794
Anxa4	4.92375	2.72313	2.86836	0.0110695	0.111816	-3.04102		6720489N17Rik	-3.44882	1.40524	-2.97039	0.00894876	0.0903846	-2.89743		Usp34	1.80093	5.4636	3.07293	0.00721867	0.0729554	-2.29186
Sh3glb2	0.842032	5.79246	2.86791	0.0110798	0.111816	-2.92797		Reps1	2.08473	3.5235	2.97024	0.00895151	0.0903846	-2.50455		Fcgr3	6.4396	0.17463	3.07236	0.00722737	0.0729757	-3.32591
Ldlrap1	1.20076	5.16815	2.86677	0.0111062	0.111816	-2.70438		Smu1	-0.440387	7.78936	-2.96916	0.00897175	0.090452	-3.18538		Fry	3.58697	1.83218	3.07178	0.00723612	0.0729965	-3.15335
Cep68	3.79781	3.58137	2.86673	0.011107	0.111816	-2.79857		Ehd3	0.778471	7.33641	2.969	0.00897476	0.090452	-3.10254		Ppm1g	0.471888	7.50355	3.07054	0.00725494	0.0731189	-2.76555
Casp3	1.52823	4.434	2.86624	0.0111183	0.111816	-2.63686		Pacsin2	-3.70618	5.08571	-2.96714	0.00900982	0.0907216	-2.48795		Zmat1	-3.21588	2.35762	-3.06988	0.00726505	0.0731531	-3.05816
Adap1	4.4235	-0.0288119	2.86607	0.0111223	0.111816	-3.38265		Zmat1	3.23426	2.35762	2.96665	0.00901889	0.0907292	-2.95679		Rassf5	-0.431129	9.08016	-3.06944	0.0072718	0.0731537	-3.11897
Slc35f2	-1.53991	4.13724	-2.86594	0.0111253	0.111816	-2.65071		Plxna3	6.15312	0.669946	2.96588	0.00903345	0.090792	-3.2524		Rps27l	0.586094	7.15292	3.06853	0.00728563	0.0732253	-2.69356
Fam160a2	-1.6358	4.67357	-2.86539	0.0111381	0.111842	-2.68011		Pgam2	4.38333	-0.276218	2.96534	0.00904377	0.0908121	-3.26379		Cd72	-1.44014	4.53914	-3.06693	0.00731021	0.0733792	-2.29544
Csf1	5.36704	0.280289	2.86476	0.0111526	0.111885	-3.252		Gimap6	0.237183	10.4433	2.96473	0.0090552	0.0908433	-3.841		Dhrs13	4.10458	1.03666	3.06666	0.00731439	0.0733792	-3.25128
Ncapd2	1.67294	5.1353	2.86311	0.011191	0.112047	-2.66251		Phf21a	-1.16028	5.5112	-2.96385	0.0090718	0.0909262	-2.55787		Klrc1	1.24394	4.8964	3.06553	0.00733165	0.0734848	-2.65592
Csf1r	5.47201	-0.0621733	2.86296	0.0111943	0.112047	-3.31259		Rod1	-0.804617	7.34274	-2.9611	0.00912417	0.0913673	-3.04653		Zfp773	-3.37186	2.5549	-3.06474	0.00734379	0.0735389	-2.94203
Ccnf	3.89156	3.35177	2.86274	0.0111995	0.112047	-2.98302		Mapre3	2.78436	3.22262	2.96051	0.00913547	0.0913965	-2.61154		Dna2	5.1927	0.831055	3.06337	0.007365	0.0736224	-3.40348
Tesk2	-3.45556	0.718837	-2.86137	0.0112314	0.112263	-2.98738		Pcid2	-1.12576	5.69474	-2.95792	0.00918503	0.0918082	-2.63001		BC052040	-1.6946	3.90104	-3.06265	0.00737613	0.0736224	-2.39739
Letm2	-2.24395	3.26881	-2.85893	0.0112886	0.112731	-2.77652		Pcca	3.10019	3.8958	2.9565	0.00921231	0.0919967	-2.61812		Hist1h1b	3.7425	2.403	3.06253	0.00737801	0.0736224	-2.82313
Rpl37a	-0.308293	10.1438	-2.85835	0.0113022	0.112764	-4.08908		Neu3	1.18539	4.73366	2.95322	0.00927563	0.0925443	-2.56146		Pitpnc1	0.44538	7.76629	3.06231	0.00738141	0.0736224	-2.85198
Rnf14	-0.728177	7.05295	-2.85629	0.0113507	0.112974	-3.23206		Ftsj1	-1.31081	4.93641	-2.95251	0.00928931	0.0925961	-2.50791		Chst10	-0.914708	5.81655	-3.06139	0.00739567	0.0736224	-2.38774
Wdr43	-0.621558	6.77798	-2.85618	0.0113532	0.112974	-3.15032		Nqo2	-1.90618	4.37978	-2.95061	0.00932625	0.0928796	-2.49487		Cercam	2.64718	1.35775	3.06128	0.00739743	0.0736224	-2.95232
4931428F04Rik	3.97095	0.983171	2.85613	0.0113544	0.112974	-3.1993		Agtrap	-1.11188	5.30736	-2.94999	0.00933832	0.092915	-2.59408		Cyth3	1.84795	4.50398	3.06115	0.00739934	0.0736224	-2.37542
Pkm2	0.213561	9.76613	2.8542	0.0114	0.113325	-3.9836		Eri1	-0.84724	6.68396	-2.94936	0.00935059	0.0929523	-2.91595		B3gnt5	4.53894	2.33436	3.05888	0.00743482	0.0739081	-2.98412
Sp100	-0.330024	9.28185	-2.8526	0.0114378	0.113396	-3.81893		Mmp9	-6.6847	2.86097	-2.94828	0.00937178	0.0930258	-3.21494		Adap1	4.6607	-0.0288119	3.05568	0.00748478	0.074337	-3.57614
Clpx	-0.864973	5.75398	-2.85223	0.0114467	0.113396	-2.92055		Msl3l2	4.80436	1.21889	2.94811	0.00937502	0.0930258	-3.0377		Jak1	0.267477	9.28845	3.05266	0.00753248	0.0747427	-3.26502
Rps3	-0.321603	10.848	-2.85202	0.0114516	0.113396	-4.27928		Rccd1	4.5849	0.0568585	2.94699	0.00939696	0.0930853	-3.16479		Cd3e	-0.309429	10.3704	-3.05004	0.007574	0.0750865	-3.48666
Dtx3l	-0.66099	7.25294	-2.85147	0.0114647	0.113396	-3.31954		Slc20a1	-0.720723	6.73214	-2.94694	0.00939808	0.0930853	-2.88847		Elovl7	3.85388	0.539974	3.04841	0.00759995	0.0752317	-3.14681
Sulf2	-3.83541	2.82903	-2.85136	0.0114674	0.113396	-2.96784		Lipe	3.80007	1.54759	2.9453	0.00943023	0.093166	-3.01859		Pdgfb	4.03333	0.976851	3.04825	0.00760243	0.0752317	-3.09156
Gcat	1.49177	4.03233	2.85112	0.0114731	0.113396	-2.66398		Rap1gds1	0.587256	7.81659	2.94519	0.00943231	0.093166	-3.21296		Cln6	-1.96284	4.42094	-3.0472	0.00761921	0.0753295	-2.43559
Xk	4.97186	0.581275	2.85029	0.0114928	0.113396	-3.21864		Rras2	-4.17603	3.48234	-2.94501	0.00943585	0.093166	-2.78393		Cd163l1	-5.30298	-0.364013	-3.04478	0.00765795	0.0755981	-3.42132
Rps24	-0.369136	9.71303	-2.85016	0.011496	0.113396	-3.97466		Ikzf4	5.22281	0.742473	2.94442	0.00944758	0.093166	-3.18014		Cyc1	0.540034	7.18545	3.04464	0.00766024	0.0755981	-2.73455
Gm15708	-2.94444	3.19015	-2.84974	0.0115059	0.113396	-2.83816		4931406H21Rik	-4.87196	2.10452	-2.94435	0.0094489	0.093166	-3.14793		Cdh13	-4.08156	-0.737595	-3.04061	0.00772527	0.0761068	-3.63165
Prex1	-0.940144	7.68228	-2.84953	0.011511	0.113396	-3.33721		Hist1h1b	-3.69424	2.403	-2.94251	0.00948532	0.0934407	-2.77786		Atxn10	-0.599074	7.50532	-3.04058	0.00772573	0.0761068	-2.79195
Dync2li1	5.11194	-0.400861	2.84865	0.011532	0.113501	-3.27659		Neurl3	-0.852162	5.99787	-2.93955	0.00954407	0.0939347	-2.74661		Cdk1	5.58074	3.86002	3.039	0.00775129	0.0762497	-2.74658
Ifng	-1.55668	5.39233	-2.84601	0.0115955	0.113974	-2.72989		Tmem9b	-0.663297	7.58457	-2.93876	0.00955993	0.0939498	-3.12789		Arid5b	1.29557	4.71168	3.03883	0.0077542	0.0762497	-2.34682
5930416I19Rik	0.808423	6.27724	2.84578	0.011601	0.113974	-3.08278		Fcgr3	-6.2505	0.17463	-2.93792	0.00957664	0.0939498	-3.18877		Smpdl3a	-0.53864	8.66457	-3.03699	0.00778409	0.0764135	-3.01659
Hsf4	3.79124	1.49145	2.84393	0.0116457	0.114307	-3.13879		Ilvbl	0.989922	6.15608	2.93784	0.00957817	0.0939498	-2.79943		Pglyrp1	0.677186	6.63586	3.03694	0.00778486	0.0764135	-2.59615
B4galnt4	3.66967	0.45877	2.84323	0.0116625	0.114307	-3.03551		Athl1	1.15064	4.99476	2.93775	0.00958004	0.0939498	-2.57891		Vasp	0.444433	7.83299	3.03589	0.00780202	0.076513	-2.90062
Snrpe	0.396765	8.15567	2.84307	0.0116663	0.114307	-3.5498		Cdca2	-4.08147	2.82481	-2.93692	0.00959667	0.0940284	-2.72983		Zkscan3	-1.56815	4.80278	-3.03525	0.00781252	0.0765472	-2.35593
Sigirr	0.68113	6.88677	2.8397	0.0117483	0.114944	-3.24849		Vdac3	-0.637433	7.28139	-2.93446	0.00964608	0.0944278	-3.12526		1700019G17Rik	4.56103	2.26209	3.03374	0.00783741	0.0766616	-3.26445
Pdcd4	-0.411157	9.07789	-2.83953	0.0117524	0.114944	-3.81951		Ifnar2	0.717153	6.72139	2.93397	0.0096558	0.0944383	-3.00301		5730405O15Rik	-4.72935	-0.218819	-3.03368	0.00783824	0.0766616	-3.57175
BC006779	-1.26633	5.2029	-2.83849	0.0117777	0.115014	-2.81257		Ppp3ca	-1.85735	5.6448	-2.93267	0.00968206	0.0944854	-2.5663		Pdik1l	1.34276	5.04025	3.03224	0.00786205	0.0768257	-2.36314
Phyhd1	4.41962	-0.645314	2.83838	0.0117806	0.115014	-3.39839		Gm4902	0.636414	7.31947	2.9325	0.00968554	0.0944854	-3.14047		Atg4d	0.921281	5.58848	3.03035	0.00789325	0.0770615	-2.43673
Abcb7	-1.34457	4.97683	-2.83788	0.0117928	0.11503	-2.77284		Pcsk4	-4.9858	1.50334	-2.93245	0.00968659	0.0944854	-3.26741		Kcnj8	3.3578	0.728384	3.02981	0.00790209	0.0770789	-2.87037
Far1	1.24133	5.93569	2.83519	0.0118587	0.115551	-2.92397		Lmna	-2.73708	2.55165	-2.92714	0.00979431	0.0954508	-2.82891		Nop58	0.688842	6.53887	3.02817	0.00792933	0.0772755	-2.60186
Abtb2	2.36536	5.01217	2.8347	0.0118707	0.115551	-2.69455		Lysmd4	4.46953	1.7552	2.92553	0.00982736	0.0956874	-3.15911		5730508B09Rik	4.17269	0.176651	3.0263	0.00796052	0.0774688	-3.26349
Tspan5	1.61176	5.19208	2.83441	0.011878	0.115551	-2.81801		Myl4	-4.22665	1.47824	-2.92038	0.00993351	0.0966348	-3.20754		Foxj3	1.51268	5.15247	3.02613	0.00796335	0.0774688	-2.3882
Atp9a	5.43267	1.0732	2.83318	0.0119082	0.115741	-3.2526		Eif4e	-0.573363	7.35056	-2.919	0.00996208	0.0967338	-3.16017		Ypel1	4.28517	1.28564	3.02295	0.00801657	0.0778604	-3.20982
Il1r1	-4.37416	-0.086348	-2.83076	0.011968	0.116165	-3.17207		Hs2st1	4.22775	1.30616	2.9186	0.00997038	0.0967338	-3.28106		Cyp4f16	-1.99484	2.39217	-3.02287	0.00801787	0.0778604	-2.47985
Trib1	5.43373	1.04836	2.83056	0.011973	0.116165	-3.24937		Ifih1	2.21314	5.11291	2.91851	0.00997215	0.0967338	-2.55167		Mosc2	-0.713897	6.54068	-3.02204	0.00803193	0.0778753	-2.59826
Dcun1d3	-2.66426	2.83097	-2.82738	0.0120523	0.116759	-2.83817		Pptc7	1.28823	5.01042	2.91799	0.00998311	0.0967338	-2.67638		Afp	-4.83309	2.97995	-3.02193	0.00803368	0.0778753	-3.07811
Zfp866	3.24677	3.48534	2.82708	0.0120599	0.116759	-2.79269		Mt1	-4.39696	-1.08378	-2.91775	0.009988	0.0967338	-3.36103		Rnf135	-4.77294	2.86428	-3.02054	0.0080571	0.0780331	-3.1024
1500032L24Rik	0.539705	7.2349	2.82681	0.0120665	0.116759	-3.35472		Slc45a4	3.94032	2.65523	2.91729	0.00999773	0.0967422	-2.84934		Fam108c	-2.29109	3.41529	-3.01982	0.0080693	0.078082	-2.72968
Arhgap25	0.743	6.83154	2.82567	0.0120951	0.116759	-3.23136		Mlf2	0.492537	7.5491	2.9165	0.0100141	0.0967685	-3.2272		Rps21	-0.420326	7.72391	-3.01917	0.00808038	0.0780928	-2.91073
Rab11a	0.489323	7.44073	2.82549	0.0120997	0.116759	-3.42326		Epb4.1	-1.27161	6.08777	-2.91621	0.0100201	0.0967685	-2.75975		2610001J05Rik	0.941392	5.67442	3.01891	0.00808473	0.0780928	-2.46801
Pygb	1.08201	6.37732	2.82536	0.0121029	0.116759	-3.06907		Plcl1	4.80472	-0.550636	2.91588	0.010027	0.0967685	-3.30719		Nars2	-1.71569	4.37603	-3.01685	0.00811976	0.0783618	-2.42619
Kras	1.04101	6.42701	2.82511	0.0121091	0.116759	-3.15012		Sept2	-0.518527	7.72405	-2.91285	0.0100906	0.0972963	-3.26202		Arhgef2	1.04738	6.71275	3.01481	0.00815448	0.0785538	-2.66791
Irf8	0.996459	6.01233	2.82144	0.0122017	0.117481	-2.94542		Ttc14	0.703119	6.79049	2.91212	0.0101059	0.0973572	-3.01481		Fam84b	-3.50226	1.61812	-3.01474	0.00815562	0.0785538	-2.99736
Pde4b	-0.756022	6.86572	-2.82128	0.0122056	0.117481	-3.26322		Lpar6	-0.747291	7.33223	-2.90785	0.0101963	0.0981413	-2.9737		Incenp	1.66406	5.09105	3.01441	0.00816125	0.0785538	-2.39374
S100a10	0.442854	9.8318	2.82084	0.0122169	0.117487	-4.00499		D730005E14Rik	1.00907	6.00717	2.90537	0.0102491	0.0984261	-2.80174		Rasgrp1	-0.574418	7.89117	-3.01306	0.00818442	0.0787075	-3.012
Atg12	-0.877615	6.17505	-2.81946	0.0122518	0.117653	-3.05884		0910001L09Rik	0.722377	5.99987	2.90515	0.0102537	0.0984261	-2.85452		Sdf2l1	0.778367	5.92613	3.01257	0.0081928	0.0787186	-2.52287
Nudt5	0.945198	5.88796	2.8193	0.0122558	0.117653	-2.98925		1810011H11Rik	3.28367	4.23765	2.90488	0.0102595	0.0984261	-2.80185		Slc29a1	0.823849	6.81592	3.01185	0.00820514	0.0787679	-2.62592
Treml2	4.0651	1.60306	2.8178	0.0122939	0.117887	-3.26284		Fli1	-0.548744	7.75794	-2.90477	0.0102619	0.0984261	-3.26588		Sap18	1.0243	5.10045	3.01019	0.0082338	0.0789735	-2.41069
D5Ertd579e	2.05222	4.34566	2.81746	0.0123026	0.117887	-2.72597		Dusp6	0.676339	7.09472	2.90398	0.0102788	0.0985013	-3.04848		Pomc	4.61592	-0.362644	3.00854	0.00826226	0.0791261	-3.58955
Zfp46	3.64118	2.68724	2.81707	0.0123126	0.117887	-2.88383		Metap1d	2.04713	3.76738	2.89871	0.0103922	0.0995009	-2.66417		Ankle1	4.81418	1.97159	3.00843	0.0082642	0.0791261	-3.09961
Armcx6	3.83728	-1.07581	2.8162	0.0123347	0.117996	-3.30613		Men1	-1.60569	5.04551	-2.89733	0.0104222	0.0996746	-2.60615		1700020L24Rik	4.41543	0.337735	3.00683	0.00829181	0.0793209	-3.55689
Panx1	-0.589648	6.78021	-2.81572	0.012347	0.117998	-3.32228		Blk	-4.23884	1.35124	-2.89703	0.0104286	0.0996746	-3.16563		Etv5	-3.26551	3.84733	-3.00566	0.00831217	0.0793729	-2.70776
Racgap1	1.92426	5.63188	2.81507	0.0123638	0.117998	-2.73083		Hadhb	0.427423	8.24183	2.89582	0.0104549	0.0998383	-3.40283		Atrn	-0.874258	6.17327	-3.00555	0.00831422	0.0793729	-2.63538
Uqcr10	0.519189	7.3831	2.81493	0.0123673	0.117998	-3.41145		Ezh1	0.972797	6.74521	2.894	0.0104947	0.10013	-3.0174		Ube2d3	0.235635	9.70687	3.00494	0.00832482	0.0793729	-3.44244
Gltp	0.443041	8.21084	2.81441	0.0123806	0.118021	-3.64652		Lck	0.207273	10.7442	2.88963	0.0105904	0.100956	-4.13064		Cyth4	0.648942	7.60432	3.00465	0.00832981	0.0793729	-2.949
Cela1	1.8801	3.95811	2.8137	0.012399	0.118093	-2.72718		Gmnn	-1.32971	5.03503	-2.88805	0.0106254	0.101201	-2.73286		Fam96a	0.646158	7.10799	3.00429	0.00833607	0.0793729	-2.77493
Lpxn	0.276697	8.59798	2.81296	0.0124179	0.118169	-3.81153		Rps27l	-0.571203	7.15292	-2.88525	0.0106874	0.101703	-3.18601		Hmga2-ps1	4.12643	-1.07717	3.00402	0.00834088	0.0793729	-3.49228
Rpsa	0.358387	10.2827	2.81254	0.0124286	0.118169	-4.19254		Cdk1	-3.75192	3.86002	-2.88338	0.0107291	0.102011	-2.6152		Man1c1	4.4776	0.96551	3.00195	0.00837708	0.0796479	-3.24504
Zscan20	-3.81653	1.62174	-2.81092	0.0124704	0.118463	-3.16125		Vbp1	-0.625363	7.1847	-2.88068	0.0107896	0.102478	-3.14943		Abhd14b	4.52325	2.27294	3.00131	0.00838825	0.0796848	-3.25335
Mfsd10	-0.72578	6.53668	-2.80998	0.0124946	0.11859	-3.23217		Aff3	1.77557	3.98666	2.88034	0.0107971	0.102478	-2.61469		Dap	0.573267	7.62127	2.99645	0.00847403	0.0803987	-2.90164
Gm4902	0.601418	7.31947	2.8088	0.0125252	0.118777	-3.45366		Jun	-5.17817	-0.617919	-2.87912	0.0108246	0.10265	-3.4469		Eif6	0.61159	7.25323	2.99622	0.00847814	0.0803987	-2.84034
Ccdc77	-4.04061	1.95765	-2.80833	0.0125375	0.118791	-3.04215		Atp5f1	-0.375862	8.71556	-2.87834	0.0108421	0.102727	-3.57494		Ubxn7	-1.0383	5.34578	-2.99565	0.0084883	0.0804251	-2.44843
Phax	0.767051	5.77588	2.80743	0.0125609	0.118909	-3.04135		Lair1	-4.27401	0.562342	-2.87657	0.0108822	0.103017	-3.02006		Idh1	4.39846	0.936773	2.99483	0.00850281	0.0804928	-3.06078
Kif15	1.6544	4.48271	2.80371	0.012658	0.119724	-2.74176		Ccnb1	-1.06429	4.75197	-2.87461	0.0109267	0.103349	-2.95687		Mtbp	4.40063	2.34239	2.99363	0.00852423	0.0806032	-3.16826
Uqcrc2	-0.505982	7.32073	-2.7968	0.0128404	0.121223	-3.4544		2310015A10Rik	5.11793	1.51778	2.8723	0.0109793	0.103756	-3.13362		Tnrc6c	-0.783962	6.05864	-2.99323	0.00853137	0.0806032	-2.56458
Cyp20a1	1.46939	4.12926	2.79662	0.0128451	0.121223	-2.75255		Cirbp	0.900216	6.71742	2.86764	0.011086	0.104675	-3.04653		Sgcb	3.73187	3.4887	2.99293	0.00853663	0.0806032	-2.78939
Actr3	-0.215561	10.7119	-2.79644	0.0128497	0.121223	-4.3011		Mrpl45	0.690691	5.76493	2.86636	0.0111157	0.104864	-2.88324		Rbbp8	1.91239	4.87675	2.99104	0.00857053	0.0808533	-2.42626
Gstcd	3.84034	1.18503	2.79237	0.0129584	0.122083	-3.17664		Spice1	-2.14195	4.68411	-2.86499	0.0111473	0.105072	-2.64132		Dstn	1.54891	5.21022	2.98968	0.00859488	0.081013	-2.42886
Jak2	-0.566488	6.405	-2.79219	0.0129632	0.122083	-3.26813		Bpgm	1.43818	4.48051	2.86377	0.0111757	0.105209	-2.662		S100a11	0.423498	9.31823	2.98735	0.00863699	0.0813398	-3.24489
Gpr174	0.689669	6.5795	2.79072	0.0130028	0.12235	-3.2064		Zfp831	2.11204	4.45706	2.86349	0.0111821	0.105209	-2.64211		Ube2d2	0.447911	8.17615	2.98657	0.00865104	0.0814018	-3.06312
Fam162a	0.723842	6.15289	2.787	0.0131032	0.123189	-3.18423		Nudt4	-1.19587	5.41352	-2.86295	0.0111946	0.105209	-2.75694		Ap1m1	0.475004	7.38984	2.98187	0.00873655	0.0821127	-2.9276
Gbp3	1.04188	5.40658	2.78471	0.0131653	0.123666	-2.92255		Atp10d	-1.54734	5.14357	-2.8618	0.0112214	0.105209	-2.67892		Fhod1	-3.18433	1.86953	-2.98119	0.00874896	0.0821127	-3.10661
Hmgn1	0.70638	6.4588	2.78415	0.0131805	0.123702	-3.2236		Malat1	0.334138	12.8089	2.86142	0.0112303	0.105209	-4.85134		Tmem106b	-0.900951	6.40517	-2.98101	0.00875232	0.0821127	-2.69384
Cd38	-0.712423	6.68848	-2.78274	0.013219	0.123883	-3.29216		Rbmxl1	-0.659649	6.6819	-2.86137	0.0112314	0.105209	-3.14623		Cenph	3.43663	3.2549	2.98071	0.00875779	0.0821127	-2.95717
Bbx	-1.08063	5.02698	-2.78262	0.0132225	0.123883	-2.88297		Ldoc1l	-3.91139	1.87512	-2.86124	0.0112344	0.105209	-3.07438		Xcl1	-0.804149	5.64139	-2.98036	0.00876421	0.0821127	-2.7425
Slc25a24	1.21506	5.84331	2.78207	0.0132375	0.123917	-2.96721		Neil3	-3.76004	2.09768	-2.86073	0.0112463	0.105209	-2.81486		Dennd5a	3.79461	2.16139	2.97925	0.0087845	0.0822323	-3.09606
Irgm1	-0.551999	7.69549	-2.78158	0.0132509	0.123936	-3.62572		Ubiad1	1.33742	4.75717	2.86059	0.0112496	0.105209	-2.71209		Prkag1	0.543262	7.13068	2.97816	0.00880459	0.0823497	-2.88182
Psd4	-0.52387	7.80228	-2.7805	0.0132803	0.124069	-3.62091		Mycbp2	0.792992	7.10925	2.86022	0.0112583	0.105209	-3.18405		Hectd3	0.761591	5.90593	2.97756	0.00881559	0.0823819	-2.58056
Mrfap1	0.43634	7.80938	2.78023	0.0132879	0.124069	-3.6103		Synpo	5.6806	-0.892056	2.85661	0.011343	0.10591	-3.38843		Kdm6b	0.746387	6.21439	2.97478	0.00886704	0.0827919	-2.59516
Fbxw4	-1.99729	3.52883	-2.77897	0.0133224	0.124285	-2.82915		Rsad2	4.3929	2.31275	2.85574	0.0113636	0.105953	-3.17056		Gm14718	4.28633	2.52321	2.97391	0.00888307	0.0828707	-3.38689
Egr3	3.43113	0.53365	2.77779	0.0133549	0.124357	-3.40428		Gm20594	0.62088	6.03818	2.85527	0.0113747	0.105953	-2.94457		Rpl12	-0.36517	8.39193	-2.97324	0.0088956	0.0829167	-3.13805
Sit1	-0.781379	6.68323	-2.77751	0.0133628	0.124357	-3.3028		Acadsb	1.6448	4.74203	2.85518	0.0113768	0.105953	-2.65995		Ptpn4	3.0629	2.62008	2.97211	0.00891668	0.0830423	-2.87371
Rpl13	-0.22507	11.2919	-2.77746	0.0133642	0.124357	-4.59526		Casc5	-4.18232	3.21309	-2.85356	0.0114152	0.10622	-2.79458		Sae1	0.689725	7.20542	2.97109	0.0089356	0.0831059	-2.87003
Vav3	-2.0664	4.46623	-2.77625	0.0133977	0.124562	-2.8005		Grhl1	4.32223	-1.04189	2.84852	0.0115351	0.107183	-3.35963		Gnptab	1.09205	5.33771	2.97087	0.0089398	0.0831059	-2.48194
Qsox1	1.77489	4.21609	2.77342	0.013476	0.125184	-2.79208		5730419I09Rik	0.836952	5.92535	2.84813	0.0115445	0.107183	-2.99537		Hist1h2bm	4.59696	-0.528409	2.97052	0.00894635	0.0831059	-3.57724
Klhl15	3.45347	2.06542	2.77228	0.0135079	0.125373	-3.14549		Samd3	-1.28538	6.03345	-2.84798	0.011548	0.107183	-2.83717		Aurka	4.63905	3.46588	2.9689	0.00897663	0.0833162	-2.8961
Adam8	-4.97002	2.62982	-2.77155	0.0135282	0.125455	-3.0578		Cldn25	-1.10322	5.3494	-2.84682	0.0115759	0.10735	-2.80393		2610035D17Rik	-1.46351	5.10605	-2.96802	0.00899325	0.0833996	-2.46807
Mcl1	-0.821886	6.766	-2.77101	0.0135434	0.125489	-3.31958		Pbx4	4.14288	1.92957	2.8427	0.0116754	0.108181	-2.97124		Cecr5	-0.800186	6.80094	-2.96591	0.009033	0.0836971	-2.83864
Pea15a	-0.853571	5.9431	-2.77013	0.0135681	0.125543	-3.06975		Hbxip	-0.526367	7.41139	-2.83947	0.0117538	0.108737	-3.32951		Ifi47	-0.40268	9.16426	-2.96427	0.00906392	0.0839092	-3.41497
Dvl2	-1.33678	4.90732	-2.76984	0.013576	0.125543	-2.90792		Isg15	2.68865	2.78937	2.83941	0.0117554	0.108737	-2.94848		Myo9a	3.68388	2.89781	2.96388	0.00907126	0.0839092	-3.05475
Pbx4	3.91485	1.92957	2.76957	0.0135837	0.125543	-2.97938		Cept1	0.855624	7.33613	2.83858	0.0117755	0.108831	-3.28075		Fam69a	1.76899	5.55172	2.96336	0.00908113	0.0839293	-2.50852
Thoc6	2.51171	4.40393	2.76893	0.0136016	0.125602	-2.80258		Morf4l1	0.654984	5.95945	2.8379	0.0117923	0.108894	-2.955		Crkl	1.8652	5.32037	2.9621	0.00910516	0.084051	-2.50693
Cd2bp2	0.636652	6.33031	2.76674	0.0136633	0.126065	-3.2781		Cybb	3.70421	0.058273	2.83678	0.0118196	0.109054	-3.15319		1600020E01Rik	-1.20665	4.46625	-2.96186	0.00910969	0.084051	-2.48755
Zscan12	4.14633	1.73059	2.7663	0.0136756	0.126072	-3.16349		Hexa	0.981453	6.32718	2.83607	0.0118371	0.109123	-3.01314		Gtpbp2	-0.965753	5.78443	-2.9562	0.00921797	0.0849781	-2.6033
Cep290	4.48041	-0.555271	2.76482	0.0137177	0.12613	-3.41011		Hook2	4.45657	1.19563	2.83181	0.0119422	0.109999	-3.4157		Med30	0.703197	6.05212	2.95556	0.00923027	0.0850198	-2.71058
H2-Q2	3.1684	1.60365	2.76478	0.0137188	0.12613	-3.04561		Ncr1	-11.0573	2.50019	-2.83134	0.0119537	0.110012	-3.26439		Rps29	-0.296879	10.4678	-2.9535	0.00927021	0.0853086	-3.73643
Arsb	-0.815225	7.09983	-2.76448	0.0137271	0.12613	-3.36303		Smchd1	-0.788278	6.08345	-2.83044	0.0119761	0.110125	-3.03839		Pebp1	-0.429627	7.71972	-2.95313	0.00927726	0.0853086	-3.00211
Tfdp1	0.986241	6.23867	2.76445	0.0137281	0.12613	-3.16936		Zc3hav1	-0.786685	6.58634	-2.82664	0.0120708	0.11086	-3.11229		Psme1	-0.350375	9.26944	-2.95248	0.00928998	0.0853266	-3.4115
2210403K04Rik	4.31645	-0.93166	2.76332	0.0137601	0.126226	-3.43827		Zfp275	2.48601	4.15467	2.82614	0.0120832	0.11086	-2.73752		Tmem37	3.04027	1.69732	2.95223	0.00929485	0.0853266	-2.78912
Cxcr3	-0.305304	9.23984	-2.76327	0.0137617	0.126226	-4.07739		Nuf2	-1.95625	3.67958	-2.82583	0.0120912	0.11086	-2.71962		Hip1r	1.28236	5.33074	2.95052	0.00932804	0.0855593	-2.51257
Cry1	-2.58211	4.63546	-2.76175	0.0138047	0.126514	-2.81144		Rqcd1	-0.720232	6.74324	-2.82528	0.0121048	0.11086	-3.15856		B4galt7	0.979896	4.97031	2.94934	0.00935112	0.085699	-2.53836
Per3	-3.36756	1.83773	-2.75906	0.0138816	0.126927	-3.10865		Tcf19	-1.05263	4.91258	-2.82488	0.012115	0.11086	-2.92998		Nup205	2.36772	4.09539	2.9465	0.00940666	0.0861337	-2.59865
Slc16a10	-3.54379	3.44179	-2.75899	0.0138837	0.126927	-2.91331		Mcm3	-0.561985	6.97011	-2.8248	0.0121169	0.11086	-3.36032		Atp6v0d2	-3.64382	3.6968	-2.94611	0.00941434	0.0861337	-2.8039
Mrps14	-0.592968	7.39698	-2.75871	0.0138917	0.126927	-3.51315		Smc2	-1.12231	6.12378	-2.82414	0.0121336	0.11092	-3.06392		St8sia1	4.09127	1.5538	2.94434	0.00944924	0.0862478	-3.34126
Spc25	3.43425	4.38872	2.75828	0.013904	0.126927	-2.91137		Sgol2	-1.54978	3.93325	-2.82157	0.0121982	0.111417	-2.71921		H2-Ke6	-0.554042	7.23992	-2.94402	0.00945538	0.0862478	-2.92264
Arl3	3.5533	2.13632	2.75814	0.0139079	0.126927	-3.1173		Zfand1	3.20897	4.14116	2.81761	0.0122989	0.112243	-2.77629		Ldb1	-1.12458	5.71711	-2.94393	0.00945731	0.0862478	-2.63438
Arntl	-1.37912	5.27892	-2.75693	0.0139429	0.12714	-2.98232		Gtse1	-3.53149	2.95706	-2.81641	0.0123295	0.112305	-2.9031		Cdc45	3.33346	3.48274	2.94379	0.00945996	0.0862478	-2.66652
Hdac4	1.31545	4.53021	2.75401	0.014027	0.1278	-2.859		Gosr2	-0.665887	7.38459	-2.81639	0.0123298	0.112305	-3.33866		Gigyf1	-1.41991	4.32434	-2.94347	0.00946632	0.0862478	-2.54218
Hrsp12	1.50885	4.08443	2.75337	0.0140455	0.127862	-2.8241		Wdyhv1	1.07117	5.97142	2.81613	0.0123366	0.112305	-2.99295		Ppp1r12a	-0.557392	7.3874	-2.94249	0.00948565	0.0862993	-3.04315
Cox10	-1.34325	5.14525	-2.75179	0.0140914	0.128173	-3.01463		D330023K18Rik	3.14045	1.86868	2.81435	0.0123821	0.112625	-3.13079		Ptma	0.248356	10.117	2.94212	0.00949309	0.0862993	-3.69358
Ckap2	5.18638	1.48579	2.75137	0.0141036	0.128177	-3.4297		Fam113b	-0.726985	6.34258	-2.81298	0.0124173	0.112851	-3.12543		Abcb9	-0.736413	7.28618	-2.94156	0.00950415	0.0862993	-2.9113
2010002N04Rik	3.55752	2.02764	2.75064	0.0141249	0.128227	-2.9689		Aurka	-2.95357	3.46588	-2.81167	0.0124512	0.113037	-2.73166		Ulk3	2.03891	5.1434	2.94138	0.00950772	0.0862993	-2.51297
Cd72	-1.44379	4.53914	-2.75036	0.0141331	0.128227	-2.87309		Atg2b	1.80742	4.53118	2.81079	0.0124738	0.113037	-2.74188		Zdhhc20	0.76856	7.42779	2.94119	0.0095115	0.0862993	-3.00334
Ern1	-4.23381	0.872207	-2.74997	0.0141443	0.128227	-3.29207		Prr5l	-3.6031	-0.184298	-2.81006	0.0124927	0.113037	-3.35441		Snx17	-0.575493	6.94259	-2.93898	0.00955536	0.0865833	-2.87182
Tgif1	1.931	3.48936	2.74917	0.0141678	0.128333	-2.83797		Gdap2	-1.24002	4.88473	-2.81006	0.0124927	0.113037	-2.84055		Hist1h4d	1.07799	4.97198	2.93882	0.00955867	0.0865833	-2.54067
Btbd7	-3.45407	2.11745	-2.74801	0.0142016	0.128533	-3.11701		Rara	-1.58359	4.78789	-2.81005	0.0124929	0.113037	-2.73306		Steap3	5.00956	1.21304	2.93838	0.00956743	0.0865908	-3.47345
Lyl1	4.14935	1.71557	2.74436	0.014309	0.129398	-3.35241		Ccdc92	2.67301	4.08051	2.80925	0.0125137	0.113037	-2.78277		Dok2	-0.389879	8.74942	-2.9367	0.00960111	0.0866139	-3.41068
Timm17b	0.698015	6.40695	2.74358	0.0143319	0.129497	-3.29719		Ywhae	-0.433155	8.10535	-2.80912	0.0125169	0.113037	-3.56903		Madd	1.01667	6.48399	2.93647	0.00960571	0.0866139	-2.756
Ubr2	0.56313	6.62677	2.74247	0.0143646	0.129686	-3.36775		Zfp566	3.60314	2.43762	2.80898	0.0125206	0.113037	-3.10229		Dcps	0.598527	6.52537	2.93643	0.00960637	0.0866139	-2.78832
Fam33a	1.05333	4.94527	2.74092	0.0144106	0.129993	-2.90268		Sec14l1	1.34308	5.04564	2.80793	0.0125478	0.11319	-2.96039		Engase	-4.2733	1.59427	-2.9357	0.00962106	0.0866139	-3.35707
Nmral1	3.04831	2.64098	2.73897	0.0144689	0.130411	-3.07233		Tmem106a	1.59766	3.56414	2.80711	0.0125692	0.113289	-2.74705		Oas1g	-2.77871	2.00407	-2.93534	0.00962829	0.0866139	-3.27725
Hvcn1	-0.999059	6.01829	-2.73825	0.0144903	0.130465	-3.16658		Pddc1	0.697583	6.20384	2.80633	0.0125895	0.113379	-3.05379		Xrcc1	1.09021	5.09833	2.93516	0.00963193	0.0866139	-2.54251
Zfp873	3.67402	2.99418	2.73796	0.0144987	0.130465	-2.9936		Zdhhc7	-0.832801	5.78289	-2.80572	0.0126054	0.113412	-2.93152		Haao	3.65612	0.484668	2.935	0.0096352	0.0866139	-3.17584
Snx14	-0.689602	6.23276	-2.7367	0.0145364	0.130696	-3.30242		Kpna1	-0.561622	6.72692	-2.80539	0.0126141	0.113412	-3.21676		Rps14	-0.271817	10.3202	-2.9341	0.00965331	0.0866139	-3.75388
Abhd6	1.50794	4.22076	2.73443	0.0146047	0.131201	-2.87796		Rnf135	4.46066	2.86428	2.80463	0.0126339	0.113497	-3.09346		2010012O05Rik	1.4017	4.52491	2.93408	0.00965372	0.0866139	-2.52598
Eef1a1	-0.200684	12.7315	-2.73357	0.0146307	0.131327	-5.19715		BC005561	2.47275	3.83226	2.80414	0.0126468	0.113507	-2.82025		2700099C18Rik	5.17956	0.296223	2.934	0.00965524	0.0866139	-3.55799
Luzp1	1.43916	4.38604	2.73292	0.0146502	0.131395	-2.88859		Pde4a	-3.92279	0.841051	-2.80379	0.0126558	0.113507	-3.13835		Itpripl1	0.779447	6.60128	2.9339	0.00965727	0.0866139	-2.80716
Inpp5b	0.526506	7.87658	2.73181	0.0146838	0.131588	-3.77907		Nfic	-1.96992	3.8716	-2.80298	0.0126771	0.113562	-2.75377		Myl12b	-0.30023	9.90533	-2.93242	0.00968722	0.0868112	-3.63241
Slmo2	0.687822	6.32082	2.73115	0.0147036	0.131615	-3.24595		Zswim7	5.05312	1.33335	2.80277	0.0126827	0.113562	-3.35763		Irf1	-0.393216	8.78784	-2.92893	0.00975796	0.0873734	-3.36209
Rara	-1.55239	4.78789	-2.73091	0.014711	0.131615	-2.87534		A730098P11Rik	0.609802	7.16698	2.80219	0.012698	0.113591	-3.32063		Gm10069	1.51447	3.83856	2.92556	0.00982672	0.0878395	-2.65116
Pfn2	3.57257	0.900876	2.72843	0.0147864	0.132087	-3.05123		Dusp7	-2.07865	3.77707	-2.80149	0.0127163	0.113591	-2.7955		Ccni	0.860121	6.9224	2.92535	0.00983095	0.0878395	-2.84252
Baz2a	1.18401	5.94446	2.72838	0.0147879	0.132087	-3.21667		BC017647	1.34786	4.91966	2.80145	0.0127172	0.113591	-2.80056		Rbm38	0.703761	7.79877	2.92502	0.00983777	0.0878395	-3.12792
Mau2	-0.726474	6.58442	-2.72679	0.0148361	0.132409	-3.38193		Cenpi	-4.39624	1.18472	-2.80034	0.0127466	0.113761	-3.07508		Pcyox1l	4.97503	1.65721	2.92481	0.00984221	0.0878395	-3.45651
Cdc25b	1.14224	6.6289	2.72369	0.0149313	0.13315	-3.26104		Tada2b	3.757	1.78044	2.79791	0.0128109	0.114241	-3.21087		Tnfrsf4	3.78173	4.43672	2.92367	0.00986558	0.0879126	-3.01375
Mrpl45	0.644159	5.76493	2.72116	0.0150093	0.133736	-3.21699		Gmfg	-0.450733	7.95757	-2.79719	0.01283	0.114246	-3.56756		Rps19	-0.336754	10.4275	-2.92357	0.00986761	0.0879126	-3.81708
Dnase1l3	3.81806	2.85888	2.71971	0.0150539	0.134024	-3.05212		Trex1	-1.12132	5.23192	-2.7971	0.0128324	0.114246	-2.90896		Elmo1	0.501776	8.1121	2.92314	0.00987652	0.0879126	-3.19967
Kif13a	3.57927	0.610579	2.71911	0.0150725	0.134076	-3.1164		Coro1b	0.369593	8.74693	2.79618	0.0128568	0.11437	-3.75381		Zfp637	-1.36681	4.46577	-2.92284	0.00988262	0.0879126	-2.55865
Klrc1	-5.9492	4.8964	-2.71873	0.0150843	0.134076	-3.0579		Arpc2	-0.231795	10.0693	-2.79547	0.0128756	0.114444	-4.10988		Fbxo48	4.51288	-1.09923	2.92199	0.00990007	0.0879423	-3.63859
H3f3a	0.329685	9.40817	2.71697	0.0151391	0.134376	-4.12097		2310067B10Rik	2.94478	3.68232	2.79451	0.0129013	0.114579	-2.84057		Thra	-2.58678	1.87427	-2.9219	0.00990207	0.0879423	-3.11084
Hmgb3	2.10538	4.42267	2.71686	0.0151427	0.134376	-2.89509		Nhp2	-0.738823	6.68757	-2.79387	0.0129183	0.114588	-3.24366		Eif4e2	0.65378	7.18982	2.92075	0.00992575	0.088081	-2.97677
Hist1h1c	-1.69723	3.89044	-2.71596	0.0151707	0.134496	-2.88557		2610019F03Rik	-5.52106	0.867936	-2.79332	0.012933	0.114588	-3.34544		Lime1	0.434661	7.88355	2.91779	0.00998711	0.0884588	-3.16158
Rpl27	-0.286341	9.70066	-2.71563	0.0151809	0.134496	-4.23754		Sh3bp1	-0.640636	6.78941	-2.79292	0.0129437	0.114588	-3.30098		Nqo2	1.5597	4.37978	2.91766	0.00998992	0.0884588	-2.55067
B3gnt9-ps	4.96778	-1.78611	2.71507	0.0151985	0.134543	-3.5248		Snx25	-3.52237	2.22201	-2.79255	0.0129536	0.114588	-3.10717		1700040I03Rik	1.51081	4.23286	2.91753	0.00999264	0.0884588	-2.56974
Ckap2l	4.16879	3.48929	2.71447	0.0152172	0.134599	-3.15768		Ifi47	-0.436633	9.16426	-2.7924	0.0129577	0.114588	-3.80849		Bard1	4.17097	0.872516	2.91525	0.0100401	0.0888072	-3.57004
Myo9a	3.46327	2.89781	2.71335	0.0152521	0.13471	-3.09052		Vps72	0.633841	6.20222	2.79211	0.0129653	0.114588	-3.10034		Rnf19b	-2.12912	3.96679	-2.91438	0.0100585	0.0888978	-2.69982
Bax	0.55292	6.83363	2.71298	0.015264	0.13471	-3.49326		Fastkd3	1.66853	3.88312	2.79144	0.0129834	0.114655	-2.76071		Fam124b	-3.55135	2.28928	-2.91338	0.0100795	0.0890114	-3.16209
Sf3b1	-0.275432	9.27482	-2.71289	0.0152667	0.13471	-4.10209		Pctp	1.13153	4.47675	2.7903	0.013014	0.114832	-2.77511		Dgkh	-4.2585	1.42955	-2.91012	0.0101481	0.0895442	-3.33545
Dcakd	1.0345	4.60644	2.71107	0.0153238	0.135105	-2.98718		Gabarap	0.29185	8.61776	2.78869	0.0130574	0.115122	-3.75202		Itgal	-0.304132	9.90094	-2.90953	0.0101605	0.0895819	-3.65789
Synpo	5.36726	-0.892056	2.7105	0.015342	0.135155	-3.42917		Ndufa10	-0.459103	7.13678	-2.78754	0.0130887	0.115223	-3.35024		Rpl18a	-0.292795	11.5881	-2.90733	0.0102073	0.0899042	-4.21447
Psma3	0.349178	8.48047	2.70929	0.0153801	0.135382	-3.90664		Btbd6	1.79275	4.58795	2.78691	0.0131057	0.115223	-2.7682		Mst1	-4.61626	0.853247	-2.90703	0.0102136	0.0899042	-3.52495
Gpr19	2.35069	3.03702	2.70824	0.0154133	0.135565	-2.98609		Fam78a	-0.869128	6.18226	-2.78677	0.0131095	0.115223	-3.1233		Cd40lg	-0.618955	7.64863	-2.90625	0.0102303	0.0899522	-3.05852
Flt3l	-0.66521	6.71419	-2.70698	0.0154532	0.135806	-3.39901		Hsd17b7	-4.00577	-0.0499976	-2.78671	0.013111	0.115223	-3.21771		Sfxn5	-4.41987	-0.659237	-2.906	0.0102355	0.0899522	-3.72759
Cbx2	3.5884	2.87253	2.70437	0.0155364	0.136428	-3.10304		Gpr146	-3.17618	2.76494	-2.78631	0.013122	0.115227	-2.87507		Tbx21	0.423831	8.0862	2.90365	0.0102859	0.0902592	-3.39291
Tnk2	-1.16271	4.52995	-2.70316	0.0155751	0.136553	-2.98188		Phax	0.739269	5.77588	2.78472	0.013165	0.115511	-3.05946		Apitd1	3.99849	1.56093	2.90345	0.0102902	0.0902592	-3.42574
Pdzd8	-0.9723	5.03872	-2.70314	0.0155757	0.136553	-3.10201		Zfp91	2.01193	3.91012	2.78428	0.013177	0.115524	-2.80919		Timeless	2.09362	4.09276	2.90288	0.0103022	0.0902592	-2.67342
Ube2d2	0.415235	8.17615	2.70161	0.0156246	0.136753	-3.83795		Chst15	3.31696	3.60076	2.78233	0.0132303	0.115898	-2.97791		Mx2	-4.96559	0.440243	-2.90282	0.0103035	0.0902592	-3.58386
Trim34a	-0.763505	6.33192	-2.70152	0.0156276	0.136753	-3.38996		Ddx39	-0.458591	8.01398	-2.78128	0.013259	0.116056	-3.6222		Inf2	4.14652	1.8419	2.90224	0.010316	0.0902958	-3.16302
Phip	0.682898	6.51571	2.70126	0.0156361	0.136753	-3.45048		H2-Ke6	0.54277	7.23992	2.77894	0.0133234	0.116526	-3.37455		Ilk	0.561677	7.6667	2.90179	0.0103257	0.0903081	-3.14422
Rbm18	-0.785854	6.12691	-2.70078	0.0156516	0.136779	-3.31325		Tmtc3	4.7906	-1.91312	2.77836	0.0133394	0.116573	-3.56019		Slc25a33	3.5691	3.06289	2.9003	0.0103579	0.0905172	-3.04219
C78339	3.95804	-0.761934	2.69676	0.0157812	0.13768	-3.54653		Rapgef4	-3.68536	1.72734	-2.77674	0.0133841	0.11687	-3.24525		Adcy6	-4.66183	-0.884178	-2.89899	0.0103861	0.0906911	-3.62804
Slc22a15	2.11997	2.0307	2.69646	0.0157909	0.13768	-2.96161		Kif4	-3.79113	2.13426	-2.77602	0.0134039	0.11695	-2.91301		Dcaf15	-2.03579	3.84115	-2.89554	0.0104611	0.091273	-2.81789
Slc25a42	2.48791	3.03848	2.69641	0.0157926	0.13768	-2.99411		Whsc1	-1.02386	5.17124	-2.77562	0.0134149	0.116952	-2.95491		Klhl4	-4.28206	2.53556	-2.89097	0.0105609	0.0920704	-3.28234
Atmin	-1.37875	4.72741	-2.69466	0.0158494	0.138066	-2.98115		Mctp2	-0.781919	6.3222	-2.77516	0.0134278	0.116971	-3.12788		Polq	4.83069	0.474852	2.88721	0.0106439	0.0927202	-3.58405
Rab14	-0.435178	7.64097	-2.69316	0.0158984	0.138232	-3.72291		Ndufc2	0.613646	6.36847	2.77472	0.0134401	0.116984	-3.21012		Bid	1.02548	5.88956	2.88582	0.0106747	0.0928632	-2.70324
Sgpp2	2.54544	1.38601	2.69288	0.0159075	0.138232	-3.17758		H2afy	-0.559831	7.31155	-2.77292	0.01349	0.117326	-3.37788		Cep170	2.5222	3.2325	2.88555	0.0106808	0.0928632	-2.86304
Ikbke	0.683607	6.95717	2.69252	0.0159191	0.138232	-3.61453		Sod2	0.525128	6.94361	2.77131	0.0135351	0.117624	-3.33157		Psme2	-0.365932	9.29826	-2.88532	0.0106859	0.0928632	-3.56319
Rnf187	-0.722248	7.82746	-2.69252	0.0159192	0.138232	-3.76146		Gdi1	0.423652	8.03258	2.77069	0.0135523	0.117634	-3.5953		Fpgt	-1.17694	5.28157	-2.88359	0.0107244	0.0931242	-2.64758
Kcnj8	-5.16502	0.728384	-2.69035	0.0159903	0.138739	-3.52804		Trip13	-1.45638	1.90383	-2.77016	0.0135671	0.117634	-2.79556		Tdp2	1.05815	5.87085	2.88199	0.0107602	0.0933603	-2.74825
Uhrf1bp1	5.17379	-0.903331	2.68916	0.0160293	0.138967	-3.52868		Uqcrfs1	-0.46077	7.30818	-2.77011	0.0135686	0.117634	-3.46071		Nmnat3	-4.39083	1.96387	-2.88084	0.0107858	0.0935086	-3.36775
Snx32	3.62014	2.74119	2.68663	0.0161129	0.139499	-3.12117		Fam123b	3.28104	3.15117	2.76962	0.0135822	0.117658	-2.95114		Decr2	-1.34226	5.11653	-2.87873	0.0108334	0.0937049	-2.61641
Ranbp3	-0.678557	6.57766	-2.68636	0.0161217	0.139499	-3.45468		Ifitm3	-4.48874	1.17395	-2.76821	0.0136219	0.117873	-3.47142		Uevld	3.60772	2.38287	2.87866	0.0108349	0.0937049	-3.09967
Ikbkb	-0.62976	7.18339	-2.68609	0.0161309	0.139499	-3.61594		Sgpp2	2.60942	1.38601	2.76798	0.0136285	0.117873	-3.15184		Acss1	1.39716	4.73483	2.87837	0.0108415	0.0937049	-2.6239
Utrn	0.470547	8.41482	2.68576	0.0161417	0.139499	-4.0195		Magohb	-1.71149	3.83657	-2.76721	0.0136501	0.117899	-2.80052		Prdm16	2.40861	3.21808	2.87797	0.0108504	0.0937049	-2.87703
Sar1b	0.583697	6.98901	2.68361	0.016213	0.140004	-3.56182		Plscr1	1.09359	4.60874	2.7671	0.0136531	0.117899	-2.91383		Gpatch1	-1.31421	4.5921	-2.87791	0.0108518	0.0937049	-2.61761
Angptl4	-3.05571	3.04463	-2.68202	0.0162661	0.140351	-3.06932		Mthfd2	0.874655	6.06177	2.76471	0.0137206	0.118387	-3.17392		Donson	0.775899	5.89348	2.87711	0.0108698	0.0937049	-2.81633
Ubtd2	3.8151	-0.345623	2.68068	0.0163106	0.140624	-3.34065		Cyp4f16	-3.89402	2.39217	-2.76261	0.0137802	0.118721	-3.3096		Rc3h1	1.1077	5.38352	2.87707	0.0108709	0.0937049	-2.70067
Dpy19l3	-1.30983	5.56569	-2.6791	0.0163636	0.140969	-3.189		Copb1	-0.595542	7.63041	-2.7625	0.0137834	0.118721	-3.53259		Ncr1	8.07773	2.50019	2.87666	0.0108801	0.0937049	-3.06347
Ulk3	1.91335	5.1434	2.67748	0.016418	0.141292	-3.04153		Dpy19l1	-2.35939	3.4277	-2.76196	0.0137987	0.118721	-2.8696		Kdm4d	-2.19463	2.44292	-2.87641	0.0108857	0.0937049	-3.01777
Metap1	0.720812	5.79011	2.67722	0.0164269	0.141292	-3.3165		Galnt9	4.68678	-0.298964	2.76182	0.0138028	0.118721	-3.47025		Ccdc109b	5.06103	0.534626	2.87263	0.0109717	0.0943075	-3.6672
1700097N02Rik	1.93434	3.53215	2.67546	0.0164863	0.141628	-3.00473		Zfp142	2.74409	3.23762	2.75992	0.0138571	0.119021	-2.99416		Fkbp1a	0.456087	8.10164	2.87257	0.010973	0.0943075	-3.24243
Gnai3	0.357425	8.00134	2.67507	0.0164995	0.141628	-3.84698		Purb	-1.0638	4.74901	-2.75974	0.0138621	0.119021	-2.86981		Dhfr	2.96933	3.45714	2.87126	0.011003	0.0944773	-2.97766
Mlf2	0.445966	7.5491	2.6749	0.0165053	0.141628	-3.77159		Spag5	-5.08615	2.18967	-2.75946	0.0138703	0.119021	-3.13743		Zbtb38	-1.91839	3.96822	-2.87095	0.0110101	0.0944773	-2.70727
Tbc1d7	3.04312	2.88195	2.67453	0.0165178	0.141628	-3.07953		Efr3a	-0.511356	7.66502	-2.75901	0.013883	0.119037	-3.51015		Myb	3.66887	3.8693	2.87053	0.0110196	0.0944799	-3.12818
Ddx6	0.746781	6.12131	2.66949	0.0166894	0.142986	-3.39656		Nde1	0.541909	6.88884	2.75847	0.0138985	0.119075	-3.39723		Ect2	2.03636	4.50188	2.86966	0.0110396	0.0944799	-2.63504
Rpl14	-0.327839	9.65816	-2.66898	0.0167067	0.143023	-4.31478		Nbas	1.97758	3.75445	2.75688	0.0139441	0.119372	-2.84292		Elf2	-0.874044	5.10239	-2.86953	0.0110425	0.0944799	-2.67107
Msh3	-1.3018	4.51168	-2.66858	0.0167204	0.143027	-3.02367		Gtf2h2	-0.906601	5.41527	-2.75497	0.0139992	0.119719	-2.9904		Kntc1	4.93957	0.597093	2.86942	0.011045	0.0944799	-3.52438
Trpm6	-3.40543	2.04067	-2.66533	0.0168321	0.143871	-3.08308		Itgal	0.299114	9.90094	2.75472	0.0140065	0.119719	-4.11614		Fam178a	-0.918211	6.38904	-2.86799	0.0110779	0.094687	-2.90229
Tubg1	3.27589	4.68347	2.66469	0.0168543	0.143947	-2.96593		Camk2g	-0.653863	5.84515	-2.75408	0.0140248	0.119782	-3.10617		Vps37b	-0.679679	6.54982	-2.86694	0.0111022	0.0947361	-2.96908
Gmfb	-0.664742	6.9865	-2.66323	0.0169048	0.144266	-3.57455		Ptprf	5.02727	-1.78426	2.75365	0.0140373	0.119794	-3.56306		E030024N20Rik	0.359544	8.3127	2.86679	0.0111055	0.0947361	-3.3649
Tnp2	4.52528	-1.03806	2.65994	0.0170188	0.145125	-3.50915		2610020H08Rik	-1.71817	4.45653	-2.75322	0.01405	0.119809	-2.83485		Camk2g	0.646002	5.84515	2.86662	0.0111097	0.0947361	-2.80374
Efnb1	-3.89075	-0.565493	-2.65742	0.0171069	0.145614	-3.33439		Ckap2	-2.66763	1.48579	-2.75222	0.0140789	0.119961	-2.90265		Tmem175	0.986594	5.48228	2.86429	0.0111634	0.0951198	-2.67122
Dapp1	0.82354	6.3896	2.65739	0.0171079	0.145614	-3.50181		Apobec3	0.299852	9.06752	2.75007	0.0141415	0.120346	-3.91126		Atat1	3.85192	2.03983	2.86383	0.0111741	0.0951364	-3.37835
Fam53b	-0.720247	6.71744	-2.65713	0.017117	0.145614	-3.49698		Zfp932	-1.31307	5.29965	-2.74991	0.0141461	0.120346	-2.99654		Exosc5	-0.704073	5.78218	-2.86339	0.0111843	0.0951495	-2.77957
Rbfa	-0.795719	5.75929	-2.65678	0.0171295	0.145614	-3.31501		Narf	1.22157	5.428	2.74949	0.0141583	0.120357	-2.97656		Mitd1	-0.709538	6.37763	-2.8594	0.0112775	0.0958675	-2.90438
Manbal	1.8837	3.44559	2.65378	0.0172348	0.146335	-3.0053		Mknk2	-0.703895	6.94766	-2.74798	0.0142027	0.12064	-3.37624		Rasal1	-3.57977	2.89318	-2.85831	0.011303	0.0959614	-3.08675
Tmed2	-0.423626	9.08429	-2.65341	0.0172481	0.146335	-4.13653		Plekhg2	0.880904	6.20404	2.74566	0.0142705	0.120973	-3.31487		Ttc9c	-0.613821	6.21251	-2.85818	0.0113061	0.0959614	-2.89871
Uba7	-0.596751	7.58036	-2.65322	0.0172545	0.146335	-3.8484		Suv39h1	-1.49419	4.70851	-2.74556	0.0142737	0.120973	-2.91197		Ndfip1	-0.361726	8.77114	-2.85733	0.011326	0.0960552	-3.43991
Pdzd11	0.67135	6.03841	2.65217	0.0172916	0.146427	-3.39757		Nucks1	-0.870917	5.86592	-2.7455	0.0142752	0.120973	-3.15074		Map2k2	-0.516849	7.27395	-2.85638	0.0113485	0.0961717	-3.17177
Ncoa1	1.56429	3.98152	2.65203	0.0172967	0.146427	-2.98715		Ulbp1	-3.12249	3.10838	-2.74449	0.0143051	0.121105	-3.03692		Traf7	0.627806	6.54682	2.85565	0.0113656	0.0962415	-2.94486
Ngly1	-0.497781	6.75898	-2.65178	0.0173057	0.146427	-3.57836		Rin2	6.26551	-0.369416	2.74395	0.0143209	0.121105	-3.51483		Pgm3	-1.20403	4.30902	-2.85387	0.0114077	0.0965236	-2.66152
Smtn	4.37046	1.88243	2.65114	0.0173282	0.146505	-3.38234		Fgf13	3.21217	4.62737	2.74385	0.014324	0.121105	-2.84526		Arpc2	0.228673	10.0693	2.85317	0.0114244	0.0965901	-3.8407
Il16	0.323268	9.05344	2.65071	0.0173436	0.146521	-4.22337		Fbxl15	3.26835	1.4664	2.74181	0.0143843	0.121521	-3.29525		Hbegf	-4.8508	-0.355018	-2.85252	0.0114398	0.0966206	-3.61408
Ube3c	1.93823	4.15477	2.65022	0.0173609	0.146554	-2.99411		Nfatc2	1.15968	6.00819	2.74029	0.0144293	0.121807	-3.17937		Slc9a7	2.64118	2.82695	2.85218	0.0114479	0.0966206	-2.98352
Tbc1d9b	-2.13318	5.74458	-2.64897	0.0174055	0.146705	-3.18351		Sgol1	-3.75814	2.2703	-2.73967	0.0144477	0.121868	-3.02552		Acadsb	-1.64967	4.74203	-2.8519	0.0114546	0.0966206	-2.67068
1300018I17Rik	3.35925	3.81204	2.64896	0.0174057	0.146705	-3.01129		Tjap1	-2.0603	3.927	-2.73881	0.0144735	0.121942	-2.85464		Cdt1	1.3176	5.31965	2.85085	0.0114795	0.096686	-2.7159
Fgf13	1.60944	4.62737	2.64822	0.0174322	0.146816	-3.24051		Timm10	-1.24618	4.73304	-2.73863	0.0144788	0.121942	-2.88934		Cox7a2	0.371407	8.03962	2.8508	0.0114807	0.096686	-3.32556
2700097O09Rik	-3.69914	3.04461	-2.64697	0.0174766	0.147076	-3.09759		Gfod2	3.79331	-0.794403	2.73799	0.0144979	0.122008	-3.3831		Nelf	3.45038	4.14625	2.85031	0.0114924	0.096686	-2.87833
2210009G21Rik	3.01705	1.99662	2.64612	0.0175072	0.14722	-3.2691		Rala	-1.0783	5.22545	-2.73731	0.0145183	0.122085	-2.96147		Hrh4	-4.17841	-0.104927	-2.84991	0.0115019	0.096686	-3.31737
Ppip5k2	0.945734	5.84696	2.6441	0.0175797	0.147442	-3.32654		Brd3	-0.739532	5.92744	-2.73615	0.0145532	0.122237	-3.1508		2310016M24Rik	-0.545546	6.87237	-2.84971	0.0115067	0.096686	-2.99109
4930417O13Rik	4.3854	0.547259	2.64407	0.0175806	0.147442	-3.44351		Gpr155	1.97072	4.87518	2.73596	0.0145587	0.122237	-2.93761		Creb1	0.804452	6.39431	2.84759	0.0115576	0.0970391	-2.92578
Tiprl	-0.571149	6.68686	-2.64399	0.0175835	0.147442	-3.55945		Ap1s1	0.716709	6.28871	2.73481	0.0145932	0.12234	-3.23253		Atad1	-0.587725	6.71582	-2.8461	0.0115932	0.0971129	-3.00519
Ptges3	-0.423017	8.02012	-2.64387	0.0175877	0.147442	-3.89618		Tmem218	4.3887	0.870295	2.7348	0.0145934	0.12234	-3.51395		Napsa	3.67818	1.40858	2.84608	0.0115938	0.0971129	-3.09763
Yars	-0.809225	6.16546	-2.64304	0.0176177	0.14758	-3.40495		Gm5141	-2.34195	3.1528	-2.73352	0.014632	0.12257	-2.91983		Tkt	0.71373	6.77987	2.84559	0.0116055	0.0971129	-3.01357
Grik5	4.42374	-0.926902	2.64235	0.0176426	0.147676	-3.53172		Tle4	1.46293	4.73214	2.73296	0.0146491	0.122619	-2.86539		Arl5a	1.36289	4.9454	2.84515	0.0116161	0.0971129	-2.71196
St6gal1	0.94561	5.72512	2.64093	0.0176938	0.147991	-3.35988		Ahr	-4.56532	0.953622	-2.73134	0.014698	0.122934	-3.39511		Hddc2	-0.902619	5.66588	-2.84508	0.0116179	0.0971129	-2.77101
Brf1	-0.681353	6.22796	-2.63953	0.0177448	0.148303	-3.45426		Fam136a	0.673091	6.10613	2.73058	0.0147209	0.123031	-3.1955		Pcyt1a	4.47689	1.11447	2.84482	0.011624	0.0971129	-3.39474
Chn2	0.491506	7.15077	2.63699	0.0178369	0.148941	-3.75427		Dclre1a	-4.63011	2.15512	-2.72609	0.0148576	0.124079	-3.31473		Fam160a2	-1.43474	4.67357	-2.84463	0.0116286	0.0971129	-2.68351
Txndc17	0.483852	6.90696	2.63668	0.0178484	0.148941	-3.62759		H2-Q2	3.11514	1.60365	2.72317	0.0149472	0.124725	-3.14762		Fam113b	0.715094	6.34258	2.84212	0.0116893	0.097545	-2.94756
Chpt1	-4.20873	1.57917	-2.63577	0.0178814	0.149103	-3.46943		Hc	5.46564	-1.55473	2.72283	0.0149578	0.124725	-3.56512		9030617O03Rik	-3.61259	1.64934	-2.83964	0.0117498	0.0979749	-3.05522
Vps28	-0.319478	8.54649	-2.63516	0.0179039	0.14917	-4.08174		Xylt2	1.27013	5.83066	2.72164	0.0149945	0.124935	-3.05994		B4galt1	0.348726	8.0393	2.83925	0.0117592	0.0979788	-3.38724
Cdh23	1.4191	3.39416	2.63481	0.0179168	0.14917	-3.01603		Zfp46	2.93579	2.68724	2.72065	0.015025	0.125093	-2.94528		E130306D19Rik	4.34992	1.23773	2.83883	0.0117694	0.0979885	-3.41524
Car15	4.6462	-1.98443	2.63156	0.0180358	0.149937	-3.60181		Hspa5	0.383967	9.54034	2.71844	0.0150933	0.125472	-4.08664		Tspan32	-0.344632	8.82262	-2.83713	0.0118111	0.098261	-3.49831
Il3ra	2.46318	2.73172	2.63155	0.0180364	0.149937	-3.17228		U2af1	1.17615	4.85772	2.71844	0.0150934	0.125472	-2.95225		Pdia6	-0.469245	7.67146	-2.83567	0.0118469	0.0984421	-3.25928
Ttc33	-0.782048	5.59248	-2.63082	0.0180634	0.150047	-3.31992		Rhof	-0.464418	7.70395	-2.71658	0.0151511	0.125856	-3.65551		2410015M20Rik	-0.510732	6.9535	-2.83528	0.0118564	0.0984421	-3.08856
Dap	0.514844	7.62127	2.62994	0.0180956	0.1502	-3.82389		Rcsd1	0.603521	7.14601	2.71596	0.0151705	0.125921	-3.51852		Ripk3	-0.72484	6.46704	-2.83514	0.0118599	0.0984421	-2.95973
Tceb3	-0.629246	7.2151	-2.62771	0.0181785	0.150774	-3.75159		4930453N24Rik	-0.675977	6.16406	-2.7126	0.0152757	0.126698	-3.1865		Appl2	-1.03784	4.63247	-2.83465	0.0118719	0.0984454	-2.70976
4930426L09Rik	4.22874	-1.02531	2.6267	0.0182157	0.150927	-3.57111		Smox	1.24463	4.78189	2.71142	0.0153129	0.12691	-2.94477		Kctd20	0.717876	5.86761	2.83439	0.0118784	0.0984454	-2.84039
Nmnat2	-3.05092	2.65144	-2.62627	0.018232	0.150927	-3.16556		Siva1	-1.17898	4.99433	-2.7098	0.015364	0.12718	-3.02394		Mcfd2	-1.03578	5.52018	-2.8322	0.0119324	0.098818	-2.76239
6720456B07Rik	0.460945	8.02201	2.62609	0.0182385	0.150927	-3.97302		4932411L15	0.780856	5.41847	2.70912	0.0153856	0.12718	-3.09499		Apex2	3.61197	3.6016	2.8309	0.0119647	0.0989521	-3.0186
Myl4	-3.88755	1.47824	-2.62559	0.0182572	0.150967	-3.42869		St6galnac3	1.94065	5.19636	2.70911	0.0153859	0.12718	-2.90847		Ppt2	-1.30301	4.75451	-2.83047	0.0119754	0.0989521	-2.70135
Hhat	3.50299	1.15127	2.62331	0.0183424	0.151558	-3.24721		4930503L19Rik	0.920469	4.88995	2.70891	0.0153921	0.12718	-3.02593		Gpm6b	-5.55529	1.09651	-2.83044	0.0119761	0.0989521	-3.71147
Dse	-1.86367	4.63859	-2.62255	0.0183708	0.151677	-3.05346		Dync2li1	4.82055	-0.400861	2.70797	0.0154218	0.127329	-3.46112		Wwox	-3.53607	1.88038	-2.83006	0.0119854	0.0989521	-3.27647
Cep55	4.13101	2.49684	2.62083	0.0184356	0.151991	-3.35524		Arfip2	1.27242	4.67137	2.70741	0.0154396	0.127349	-2.9328		Fanci	3.34145	2.81074	2.82972	0.0119939	0.0989521	-3.10034
Rnf44	-0.461713	7.47587	-2.6208	0.0184366	0.151991	-3.80405		Sh3rf1	2.02868	3.66166	2.70716	0.0154475	0.127349	-2.90027		Mtif2	-0.688434	5.9834	-2.82921	0.0120066	0.098976	-2.88907
Bub1	4.26822	2.3382	2.61958	0.0184827	0.152208	-3.41466		Agfg2	-1.01866	5.59531	-2.70622	0.0154773	0.127498	-3.06579		Utp14a	1.55085	4.24779	2.82888	0.012015	0.098976	-2.72486
Ikbkap	-1.95629	4.67303	-2.61936	0.0184909	0.152208	-3.0593		Cdc27	-1.589	5.43096	-2.70517	0.0155109	0.127678	-3.05706		Tor3a	-1.0973	5.62834	-2.8268	0.0120668	0.0992562	-2.76455
Kpna2	0.952431	7.48487	2.61827	0.0185321	0.152389	-3.65036		Tyw1	0.934848	5.67106	2.70273	0.0155887	0.128198	-3.15125		1110051M20Rik	-3.49017	2.61782	-2.82679	0.0120672	0.0992562	-3.32231
Cog6	-0.633133	6.0387	-2.61804	0.0185408	0.152389	-3.42597		Gzmm	-3.59495	0.891751	-2.70246	0.0155975	0.128198	-3.2335		5830411N06Rik	-4.01193	0.866333	-2.82616	0.0120827	0.0993096	-3.19619
Mtm1	-4.40743	2.14165	-2.61744	0.0185634	0.15246	-3.29105		Polr3k	-0.623373	6.27715	-2.70165	0.0156234	0.128314	-3.29778		Gmfg	0.444881	7.95757	2.82577	0.0120926	0.0993158	-3.35907
Psmb10	-0.438569	8.26996	-2.61511	0.0186519	0.153071	-4.01742		1700025G04Rik	-1.80346	4.13554	-2.70123	0.0156371	0.12833	-2.90716		Top3a	-1.44917	4.57544	-2.82467	0.0121203	0.0994683	-2.71414
Dtx4	-1.82087	2.51986	-2.61375	0.0187038	0.153383	-3.04666		Ppcdc	0.612322	7.10255	2.69991	0.0156795	0.128536	-3.49362		Obfc2a	-0.463581	7.20047	-2.82389	0.0121397	0.0995266	-3.29002
Zfp335	-0.689993	5.89887	-2.61321	0.0187241	0.153434	-3.40857		Gm19705	2.93098	2.62804	2.69971	0.0156858	0.128536	-3.14213		Zfp654	-1.18499	4.82018	-2.82366	0.0121456	0.0995266	-2.72126
Pias3	1.15363	5.38036	2.61229	0.0187594	0.153607	-3.27028		Hhat	3.82328	1.15127	2.69859	0.0157221	0.128737	-3.27371		Mfsd10	-0.709338	6.53668	-2.82278	0.0121679	0.0996344	-3.02873
Lnp	-1.2762	4.74716	-2.61145	0.0187917	0.153757	-3.12767		Acpl2	-3.39214	4.2212	-2.69701	0.0157731	0.129058	-2.98407		Tmem135	-0.944177	6.00528	-2.82233	0.0121791	0.0996514	-2.85048
Ksr1	3.24668	1.77754	2.61051	0.0188275	0.153934	-3.30895		Cblb	-1.02958	6.01814	-2.69597	0.0158067	0.129174	-3.13207		5430437P03Rik	0.856019	6.29787	2.82017	0.0122339	0.0999742	-2.95693
Ift57	-2.02584	3.04147	-2.60815	0.0189185	0.154563	-3.08369		Gadd45g	-2.02771	2.79849	-2.69584	0.015811	0.129174	-3.02073		Gnai3	0.367399	8.00134	2.82005	0.0122369	0.0999742	-3.3542
Pigu	0.670315	6.11923	2.60713	0.0189578	0.154768	-3.50427		Klhl21	-0.873972	5.46164	-2.69498	0.015839	0.129306	-3.07981		Degs1	0.572691	7.29665	2.81848	0.0122767	0.100224	-3.18989
Tcea1	-0.387416	7.64881	-2.60661	0.0189781	0.154817	-3.92118		Tmem29	1.6494	3.87674	2.69157	0.0159502	0.130117	-2.92264		Acadvl	-0.660428	7.12687	-2.81761	0.0122987	0.100329	-3.15125
Alas1	1.15022	4.86939	2.60585	0.0190074	0.154941	-3.18449		Tef	-3.2593	2.04511	-2.69109	0.0159659	0.130148	-3.16341		Ndufv3	-0.413197	7.37321	-2.81618	0.0123354	0.100554	-3.24678
Mcm2	0.532379	7.32831	2.60447	0.019061	0.155262	-3.76508		E130308A19Rik	1.69824	4.33691	2.69044	0.0159875	0.130226	-3.05377		Pfdn5	-0.392637	8.10062	-2.8126	0.0124272	0.101226	-3.3839
H2afx	0.823668	6.97718	2.604	0.019079	0.155293	-3.5604		Ppt1	0.39199	7.76624	2.68986	0.0160064	0.130283	-3.70013		Flnb	4.02604	2.14498	2.81117	0.012464	0.10145	-3.37357
Icam4	4.71108	-0.328003	2.60325	0.0191084	0.155322	-3.51492		Fbxl2	-6.7616	-1.001	-2.68928	0.0160256	0.130293	-3.48869		Acadl	0.556212	6.78051	2.81032	0.0124859	0.101552	-3.0804
Sp1	1.272	4.52433	2.60316	0.0191119	0.155322	-3.15422		St8sia6	-3.91481	2.05144	-2.6891	0.0160315	0.130293	-3.20383		Nap1l1	0.537303	7.30313	2.80927	0.0125132	0.10166	-3.22092
Rap2b	0.572929	6.77348	2.60264	0.0191322	0.155322	-3.63046		Tmem81	-4.24016	-0.63069	-2.6882	0.0160609	0.130435	-3.56777		Vrk2	1.32589	4.87014	2.80909	0.0125178	0.10166	-2.73638
Rnpc3	-1.05035	5.48907	-2.60245	0.0191395	0.155322	-3.25401		Ttc3	0.850819	6.34063	2.68632	0.0161231	0.130831	-3.34663		Plk1s1	-1.79897	4.24987	-2.80826	0.0125392	0.101759	-2.74563
Synj2	1.28345	4.61802	2.60185	0.0191629	0.155388	-3.14588		1700049G17Rik	3.89571	1.79822	2.68591	0.0161366	0.130831	-3.24209		Haus8	1.31844	4.49155	2.80695	0.0125735	0.101909	-2.7411
2610029G23Rik	0.590027	6.47025	2.60151	0.0191761	0.155388	-3.59519		Wfs1	3.80223	0.159353	2.6853	0.0161569	0.130831	-3.32005		Rnf113a1	-3.31163	2.89443	-2.80618	0.0125935	0.101909	-3.16622
Spcs3	-0.413979	7.56143	-2.60041	0.0192193	0.155622	-3.87493		Hmgcr	-0.915024	5.97067	-2.68528	0.0161576	0.130831	-3.22857		Pold4	0.932268	5.5321	2.80607	0.0125963	0.101909	-2.79573
Larp7	0.683598	6.1566	2.59944	0.0192572	0.155813	-3.46035		Klhdc2	-0.735658	6.07049	-2.68486	0.0161714	0.130846	-3.35207		BC046331	2.02262	3.87326	2.80585	0.012602	0.101909	-2.78348
Ndufv2	0.484861	7.62306	2.59805	0.0193118	0.156139	-3.90488		Plac8	-1.54576	6.2496	-2.68305	0.0162317	0.131236	-3.1138		Sqle	3.72836	2.68821	2.80576	0.0126044	0.101909	-3.14831
Thumpd3	0.809744	6.28378	2.59708	0.0193501	0.156334	-3.58305		Dtx4	3.69258	2.51986	2.68125	0.0162916	0.131623	-3.33569		Marcksl1	2.30583	4.39879	2.80398	0.0126509	0.102209	-2.92999
Aplf	-2.39474	3.61275	-2.59526	0.0194218	0.156786	-3.1014		Casd1	1.31671	4.80925	2.68007	0.0163311	0.131758	-2.97703		Vav3	-1.69432	4.46623	-2.8026	0.0126872	0.102402	-2.74763
Eif4g2	-0.232535	9.9795	-2.59493	0.0194348	0.156786	-4.51373		Tnp2	4.56896	-1.03806	2.67983	0.0163393	0.131758	-3.56355		Fgfr1op2	0.422592	7.88282	2.80236	0.0126935	0.102402	-3.38713
Hmgcl	0.643946	6.20435	2.59262	0.0195265	0.157306	-3.56416		St13	0.554702	7.09279	2.67967	0.0163446	0.131758	-3.61185		Zfml	-0.639512	6.51881	-2.80126	0.0127224	0.102559	-3.05353
Polk	1.83108	4.28056	2.59258	0.0195281	0.157306	-3.08316		Xpr1	2.78147	3.09507	2.6789	0.0163704	0.131869	-3.13955		Ecm1	3.54036	3.55501	2.80081	0.0127342	0.102574	-3.13937
Nab2	0.948692	5.60464	2.59129	0.0195793	0.157602	-3.39724		Atp5h	-0.312149	8.77288	-2.67808	0.016398	0.131888	-3.99737		D730005E14Rik	-0.957094	6.00717	-2.80047	0.012743	0.102574	-2.89289
Stat1	-0.24697	9.78966	-2.58967	0.0196439	0.158006	-4.56855		Sept6	0.34377	8.48018	2.67735	0.0164223	0.131888	-3.88799		Il6st	1.64958	5.07549	2.79788	0.0128116	0.103049	-2.75101
Btf3l4	0.665982	6.48355	2.58842	0.0196941	0.1582	-3.68142		BC094916	-0.876152	5.42394	-2.67728	0.0164248	0.131888	-3.11455		Sip1	1.21996	4.60942	2.7967	0.0128428	0.103172	-2.75306
Herc4	-0.902719	6.19669	-2.58798	0.0197117	0.1582	-3.49303		Tmem154	0.669604	7.75269	2.67716	0.0164288	0.131888	-3.66321		Zscan21	1.56206	4.73176	2.7966	0.0128457	0.103172	-2.7561
4932438A13Rik	-0.666438	6.99298	-2.58763	0.0197259	0.1582	-3.77323		Fam120b	0.837865	6.61961	2.67703	0.0164332	0.131888	-3.40561		9130023H24Rik	3.39858	3.18605	2.79613	0.012858	0.103195	-3.08001
Tmod3	-0.665041	7.47492	-2.58762	0.0197261	0.1582	-3.84204		Ccr7	-0.824987	6.3399	-2.67468	0.0165126	0.132372	-3.53694		Ctla4	4.57854	3.31806	2.7949	0.012891	0.103384	-3.26702
Atp6v0d2	-2.19449	3.6968	-2.58557	0.0198085	0.158571	-3.11013		Fam117b	1.98955	2.65975	2.67453	0.0165177	0.132372	-2.94992		Ppt1	-0.397513	7.76624	-2.79414	0.0129112	0.10347	-3.34796
Lmf1	1.48387	4.06221	2.58535	0.0198175	0.158571	-3.10623		Nanos1	4.37079	1.47675	2.67302	0.016569	0.132611	-3.16791		Vps33a	-0.82799	5.75606	-2.79314	0.012938	0.103545	-2.89724
Ddx60	-1.28259	4.38018	-2.58534	0.0198181	0.158571	-3.27073		Eng	5.09303	-0.00369531	2.67293	0.0165719	0.132611	-3.54491		Sf3a1	-0.604218	6.89322	-2.79283	0.0129461	0.103545	-3.12045
Eml2	3.8679	1.14854	2.58503	0.0198304	0.158571	-3.42878		Dguok	0.857824	6.94063	2.67153	0.0166196	0.132896	-3.47666		Psmb8	-0.313351	10.1	-2.79272	0.012949	0.103545	-3.96475
Slc6a13	-3.99275	-0.00314177	-2.58458	0.0198485	0.158599	-3.46666		C1qtnf6	-3.48217	0.880907	-2.67067	0.0166489	0.132957	-3.23486		Cd53	-0.277736	10.3081	-2.79214	0.0129646	0.103594	-4.06497
Ap1s2	1.25881	4.40851	2.58299	0.0199128	0.158802	-3.14331		Dnm2	-0.455426	8.11991	-2.67059	0.0166516	0.132957	-3.82133		Trex1	1.12341	5.23192	2.7901	0.0130194	0.103955	-2.827
Sh3bgrl	0.787584	7.03555	2.58292	0.0199156	0.158802	-3.73925		Harbi1	4.37261	2.41396	2.66993	0.0166742	0.132967	-3.27962		Zfyve21	-3.44289	2.70379	-2.78762	0.0130865	0.104415	-3.22165
Zdhhc2	4.18393	1.87531	2.58253	0.0199317	0.158802	-3.41054		Prps1l3	-0.910162	6.78036	-2.66969	0.0166823	0.132967	-3.44735		Stat2	-1.49758	5.31439	-2.78659	0.0131142	0.104559	-2.80869
Ftsj1	-1.16708	4.93641	-2.58252	0.019932	0.158802	-3.17205		Nmnat3	4.10023	1.96387	2.66948	0.0166894	0.132967	-3.34508		Hells	2.82336	4.53209	2.78588	0.0131336	0.104638	-2.81231
Ints10	1.00548	5.32959	2.58112	0.0199889	0.159138	-3.33363		Cdh13	3.67427	-0.737595	2.66846	0.0167247	0.133151	-3.65874		Cbx2	3.62433	2.87253	2.7846	0.0131684	0.104693	-3.23994
Apex2	3.38648	3.6016	2.5798	0.0200425	0.159449	-3.16593		Lamp2	0.781758	6.51869	2.66784	0.0167459	0.133223	-3.38821		Tmem176b	-0.968406	3.07228	-2.78448	0.0131716	0.104693	-2.82839
Dusp4	5.0184	-1.70271	2.5772	0.0201488	0.160178	-3.62484		Ipcef1	0.54408	6.66615	2.66735	0.0167626	0.133259	-3.53639		Ramp3	-3.72681	1.76666	-2.78421	0.0131791	0.104693	-3.27945
Psmc5	0.484473	7.57741	2.57676	0.0201667	0.160203	-3.94249		Cnn2	-0.256955	10.4699	-2.66542	0.016829	0.133689	-4.50427		Ict1	0.600085	6.43922	2.78395	0.0131861	0.104693	-3.10935
Gpr68	-2.55995	5.39938	-2.57503	0.0202376	0.16065	-3.16176		Chd7	-1.05174	5.78138	-2.66468	0.0168546	0.13374	-3.19027		A130049A11Rik	4.22576	1.83519	2.7836	0.0131956	0.104693	-3.43348
5033414D02Rik	0.617505	6.49558	2.57355	0.0202988	0.160985	-3.70869		Rbm15	-0.598613	6.18401	-2.66452	0.0168599	0.13374	-3.36338		Kin	1.3078	4.41797	2.78307	0.0132101	0.104693	-2.77549
Cad	1.28683	4.60857	2.57329	0.0203093	0.160985	-3.16477		4632415K11Rik	4.07074	2.0867	2.66288	0.0169169	0.134094	-3.21297		Abhd16a	-0.803764	6.59108	-2.78277	0.0132182	0.104693	-3.15081
Vps13a	0.878698	5.64182	2.57164	0.0203777	0.16138	-3.40611		Afp	4.35252	2.97995	2.66109	0.016979	0.134489	-3.2482		1500015A07Rik	-2.43672	3.18887	-2.78262	0.0132225	0.104693	-3.05571
Spnb2	0.599916	6.86135	2.57116	0.0203974	0.16138	-3.77577		St3gal6	-0.856569	6.41766	-2.66021	0.0170096	0.134633	-3.34977		Prdx5	-0.540716	6.96218	-2.78245	0.0132271	0.104693	-3.18318
Epb4.1	-1.13319	6.08777	-2.57101	0.0204036	0.16138	-3.44447		Pigs	0.482306	7.55393	2.65972	0.0170266	0.134671	-3.72089		Inpp5d	-0.470048	7.91219	-2.7821	0.0132365	0.104693	-3.44013
Tsc22d3	-1.52306	5.87943	-2.57037	0.0204305	0.161476	-3.23975		Mastl	-2.93146	1.46858	-2.6589	0.0170554	0.134775	-3.12013		Syt11	1.34387	5.49493	2.77939	0.0133109	0.105163	-2.78806
Dbi	0.496526	6.82642	2.56966	0.0204599	0.161591	-3.71062		1110008P14Rik	0.702961	5.7842	2.65863	0.0170645	0.134775	-3.29239		Fhl2	2.43252	3.06774	2.77924	0.0133152	0.105163	-2.87432
Nckap1l	0.497963	7.80259	2.56676	0.0205806	0.162357	-4.01996		Ppp1ca	-0.277025	9.79653	-2.65746	0.0171056	0.135002	-4.31367		Eif4ebp1	1.74473	4.17333	2.77888	0.013325	0.105164	-2.83239
Chd7	-1.02977	5.78138	-2.56632	0.0205988	0.162357	-3.40248		St8sia4	-0.861085	6.9673	-2.65596	0.0171582	0.135319	-3.51104		Anapc1	0.636511	6.52052	2.77492	0.0134344	0.105891	-3.10516
Thtpa	-1.17216	5.43621	-2.56604	0.0206105	0.162357	-3.35837		Rnf19a	0.98547	6.01011	2.65431	0.0172162	0.13563	-3.36051		Bik	-2.36026	1.6779	-2.77471	0.0134402	0.105891	-3.02697
Ugcg	-0.60715	6.6155	-2.56591	0.0206163	0.162357	-3.68894		Ppp1r14b	1.26063	4.9628	2.65413	0.0172225	0.13563	-3.07037		Ahcyl2	-0.9804	5.14938	-2.7745	0.0134462	0.105891	-2.85026
Cyp2d22	-5.80204	-0.213604	-2.56504	0.0206526	0.162444	-3.60212		5430427O19Rik	-2.10183	3.84026	-2.65324	0.0172539	0.13578	-3.03106		Tagap	0.811219	6.63261	2.77251	0.0135014	0.106197	-3.07378
Slc26a11	2.03572	4.04219	2.56493	0.0206571	0.162444	-3.18422		Sdf2	0.709816	6.60033	2.65024	0.0173602	0.13639	-3.46211		Trip10	3.37539	2.0336	2.7724	0.0135045	0.106197	-3.32604
Kcnh3	-4.79785	0.0010521	-2.56369	0.0207091	0.162736	-3.58581		Ube2l6	1.49235	3.17058	2.6502	0.0173615	0.13639	-2.99069		Hist1h2ab	3.43961	1.38693	2.77195	0.0135172	0.10622	-3.517
Itgb3bp	1.47462	4.23593	2.56167	0.0207943	0.163287	-3.1731		Accs	1.47048	3.68317	2.64965	0.0173811	0.13639	-2.99574		Msh5	4.57551	-0.44162	2.77114	0.0135398	0.106321	-3.74396
Rnf113a2	-0.870065	4.71382	-2.56131	0.0208097	0.163287	-3.31516		Isyna1	0.52676	6.97218	2.64964	0.0173814	0.13639	-3.61766		Parp8	-1.05076	5.15253	-2.76927	0.0135921	0.106655	-2.8365
Gyk	4.60414	0.367352	2.56057	0.0208409	0.163287	-3.54667		3230401D17Rik	-0.532147	6.72648	-2.64926	0.017395	0.136398	-3.48846		Brca1	4.39861	1.36769	2.76724	0.0136492	0.107001	-3.40244
Uhrf1	4.03639	4.60008	2.56008	0.0208617	0.163287	-3.16701		Hist1h1e	-1.68433	3.49644	-2.64782	0.0174462	0.136701	-3.03448		Banf1	0.353407	8.19351	2.76701	0.0136557	0.107001	-3.53767
Slc37a3	-1.24854	5.39425	-2.55994	0.0208677	0.163287	-3.32085		Dock10	-0.793385	7.51548	-2.64437	0.0175701	0.137573	-3.68133		Ciz1	-0.836007	6.16774	-2.76568	0.0136931	0.107167	-3.01848
Ttll12	0.938171	5.44576	2.5599	0.020869	0.163287	-3.43554		1700056E22Rik	3.85936	0.585218	2.6436	0.0175976	0.13769	-3.56778		Paics	0.590787	7.57729	2.76533	0.0137032	0.107167	-3.38111
2310067B10Rik	1.69964	3.68232	2.55825	0.0209391	0.163714	-3.18689		Abhd6	1.3824	4.22076	2.64295	0.0176208	0.137749	-3.03123		Trdmt1	3.53963	2.42274	2.76522	0.0137063	0.107167	-3.23865
Hist3h2a	-1.16132	4.74497	-2.55791	0.0209536	0.163714	-3.30346		Bcl9	4.13099	1.36337	2.64269	0.0176303	0.137749	-3.41953		Lysmd4	-4.2477	1.7552	-2.76321	0.0137633	0.107535	-3.53428
Ddit3	-0.805179	5.03179	-2.5573	0.0209797	0.163757	-3.37906		Gm5134	4.41958	0.296665	2.64121	0.0176836	0.138066	-3.57857		Rab3d	2.50208	4.00486	2.76185	0.0138019	0.10776	-2.92594
Polr3h	1.42562	4.18438	2.55708	0.0209891	0.163757	-3.16605		6720456H20Rik	1.71352	4.39705	2.63941	0.0177491	0.138478	-3.00983		Drg2	-0.946764	6.21998	-2.75804	0.0139109	0.108533	-3.03732
Eif2a	1.03496	5.11308	2.55583	0.0210421	0.164053	-3.3049		Wdr92	-0.721682	6.17549	-2.63712	0.0178321	0.139027	-3.37425		Rrp9	0.880403	5.63899	2.7574	0.0139292	0.108588	-2.96936
Sepn1	-3.94661	2.30775	-2.55485	0.0210841	0.164263	-3.42288		Ppm1h	-0.461941	7.73083	-2.6358	0.0178803	0.139257	-3.76853		Neu1	-0.622489	6.49177	-2.7571	0.0139378	0.108588	-3.12022
Ears2	4.71017	0.0733697	2.55296	0.021165	0.164681	-3.54088		Atp8a2	-3.08923	4.74088	-2.63515	0.017904	0.139257	-3.12172		Pdcd4	-0.385	9.07789	-2.75674	0.0139483	0.108592	-3.77418
Memo1	0.911523	5.75994	2.55256	0.0211823	0.164681	-3.41514		Klhl2	-4.79484	-0.150975	-2.63495	0.0179115	0.139257	-3.61537		Tmem181c-ps	-0.70435	5.52932	-2.75561	0.0139808	0.108767	-2.92055
Pdp1	2.07792	4.02308	2.55255	0.0211829	0.164681	-3.14544		Cln6	1.75611	4.42094	2.63492	0.0179126	0.139257	-3.01351		Mfsd5	-0.561124	7.0904	-2.75494	0.014	0.108839	-3.30703
Lrrc29	4.60139	-0.525867	2.55219	0.0211983	0.164683	-3.62603		Dcakd	1.02326	4.60644	2.63409	0.0179432	0.139395	-3.08769		Cdc6	3.96496	3.53969	2.75432	0.0140182	0.108844	-3.12689
Hspa4l	2.18723	3.73405	2.55045	0.0212733	0.165032	-3.14491		Cdc45	-3.37393	3.48274	-2.63335	0.01797	0.139504	-3.0592		Polh	1.25792	4.32282	2.75423	0.0140206	0.108844	-2.8222
Tor1aip1	-0.631097	6.68299	-2.55044	0.0212735	0.165032	-3.79907		Gm9958	-4.68276	0.46018	-2.63275	0.0179921	0.139576	-3.54457		Fbxo33	-3.21756	3.02757	-2.75373	0.014035	0.108848	-3.2722
Atxn2	3.13273	2.22222	2.54952	0.0213132	0.165222	-3.3377		2210408F21Rik	3.94405	-1.37212	2.63186	0.0180249	0.139731	-3.62952		Btbd11	-1.16099	5.75056	-2.75352	0.0140411	0.108848	-2.96596
Clk3	-0.56768	6.97779	-2.54871	0.0213482	0.165377	-3.78871		Irf9	0.615389	7.36303	2.62598	0.0182426	0.141318	-3.69454		Slc10a3	-0.791079	5.94219	-2.75238	0.0140742	0.109028	-2.98851
Mxd3	3.14083	3.28694	2.54823	0.021369	0.16542	-3.26927		Rap2a	-3.83393	-0.940265	-2.6254	0.0182643	0.141387	-3.5479		Naa40	1.11245	6.14416	2.74995	0.0141448	0.109497	-2.98792
Top2a	2.55136	6.36931	2.54737	0.0214065	0.16553	-3.30814		Mtmr9	-1.30319	4.27307	-2.62493	0.0182817	0.141421	-3.07486		Trafd1	-0.501452	6.70252	-2.74905	0.0141714	0.109625	-3.19315
Pglyrp1	0.585604	6.63586	2.54699	0.021423	0.16553	-3.71074		Tmem8	3.34708	1.96727	2.62442	0.0183009	0.141469	-3.36685		Uap1	0.906288	5.00918	2.7478	0.0142079	0.109817	-2.88532
Cyp51	3.37337	4.39618	2.54686	0.0214287	0.16553	-3.16111		Chst2	-0.717295	5.50823	-2.62231	0.0183799	0.141729	-3.3171		Il16	-0.359745	9.05344	-2.74751	0.0142163	0.109817	-3.72291
Gas2	4.83317	-0.767474	2.5454	0.0214921	0.165903	-3.62828		6530402F18Rik	-3.07259	2.09577	-2.62229	0.0183808	0.141729	-3.3012		Kcnip3	-4.34995	-1.0252	-2.74477	0.0142968	0.110316	-3.65589
Nup54	-1.14798	5.45665	-2.54323	0.0215867	0.166214	-3.35235		Ndufa11	-0.36472	7.3955	-2.62223	0.0183829	0.141729	-3.78154		Katna1	0.60042	6.71959	2.74441	0.0143074	0.110316	-3.21411
U2af2	-0.580893	6.68695	-2.54318	0.021589	0.166214	-3.74134		Iars	-1.14453	5.8039	-2.62213	0.0183865	0.141729	-3.28584		Ccnd3	0.365526	8.36746	2.74428	0.0143112	0.110316	-3.74671
Asf1a	1.04138	5.58375	2.54272	0.021609	0.166214	-3.46946		2210403K04Rik	4.05725	-0.93166	2.62175	0.0184007	0.141739	-3.60824		Hmg20b	-0.999527	5.04318	-2.74347	0.0143353	0.110414	-2.85269
Il10ra	2.27172	4.89341	2.54272	0.021609	0.166214	-3.1562		Lmnb1	-1.06604	4.49383	-2.62026	0.018457	0.141973	-3.10379		Rnf216	3.88355	2.66889	2.74255	0.0143623	0.110414	-3.42608
Zbtb37	-4.767	0.413835	-2.54247	0.0216202	0.166214	-3.5878		Slc39a8	5.00796	-1.63283	2.62025	0.0184572	0.141973	-3.66202		Acvrl1	3.88361	-0.99069	2.74244	0.0143657	0.110414	-3.64071
Stam2	-0.756393	5.9239	-2.5421	0.0216361	0.166214	-3.56381		Hnrnpul2	1.46348	3.89389	2.61804	0.0185407	0.142515	-3.04253		Pcbp4	5.09509	1.46015	2.74224	0.0143716	0.110414	-3.52245
Htra2	1.81016	3.5364	2.54203	0.0216391	0.166214	-3.16243		Cdc42se1	-0.472953	8.53587	-2.61761	0.0185568	0.142539	-4.08264		Cltb	-0.879756	5.25493	-2.7419	0.0143817	0.110414	-2.93162
Adcy6	-4.05758	-0.884178	-2.54027	0.0217164	0.166691	-3.59404		D930028M14Rik	-4.06835	0.254884	-2.61356	0.018711	0.143594	-3.4959		Paqr4	4.7406	2.01324	2.74168	0.0143881	0.110414	-3.3674
Ctsz	0.740958	6.66312	2.5391	0.0217682	0.166801	-3.80255		Btbd16	2.9691	1.66807	2.61331	0.0187205	0.143594	-3.33854		Zfp467	-1.57831	4.44995	-2.74119	0.0144026	0.110414	-2.84804
Zhx1	-0.565083	6.98573	-2.53889	0.0217775	0.166801	-3.8704		Sgpp1	-1.19793	5.63867	-2.61256	0.018749	0.143712	-3.213		Rpgrip1l	4.61859	-0.235996	2.74112	0.0144049	0.110414	-3.65069
Aqp3	-5.50134	0.701603	-2.53865	0.0217881	0.166801	-3.54196		Cd2bp2	0.620674	6.33031	2.61113	0.0188037	0.14403	-3.49694		2210404O07Rik	3.12233	3.15514	2.73726	0.0145198	0.111217	-3.15434
Ube2v1	0.341938	8.55271	2.53795	0.0218189	0.166801	-4.29458		2610528E23Rik	1.33481	3.94601	2.61076	0.0188179	0.144038	-3.05603		Cct2	0.380912	7.72877	2.73642	0.0145449	0.111309	-3.46842
Mvd	-1.42235	4.55711	-2.53745	0.0218408	0.166801	-3.22393		Kidins220	-0.815075	5.94863	-2.60997	0.0188485	0.144171	-3.37873		6330512M04Rik	0.718443	5.97867	2.73609	0.0145549	0.111309	-3.08905
Etv5	-1.66767	3.84733	-2.53744	0.0218414	0.166801	-3.23857		Tcf25	0.4049	7.7147	2.60724	0.0189536	0.14478	-3.84614		Cpne7	1.98194	4.44483	2.73572	0.0145661	0.111309	-2.87232
Jak3	0.584536	7.29868	2.53741	0.0218428	0.166801	-3.96366		Clp1	-0.705732	6.10872	-2.60721	0.0189546	0.14478	-3.36198		Uggt1	0.839121	6.4663	2.73527	0.0145793	0.111309	-3.11571
Capn7	0.946811	5.90459	2.53718	0.021853	0.166801	-3.53039		Nup54	-1.16433	5.45665	-2.60639	0.0189866	0.144922	-3.20827		2610507B11Rik	0.765565	6.02868	2.73516	0.0145828	0.111309	-3.06698
A730085K08Rik	3.42139	-1.08919	2.53667	0.0218754	0.166855	-3.55354		Ect2l	4.89324	-1.28097	2.60368	0.0190916	0.145622	-3.67923		Cox5a	0.394873	8.02543	2.73449	0.0146028	0.111383	-3.54624
Eif4ebp1	1.62827	4.17333	2.53516	0.0219425	0.166886	-3.17217		Lpar2	4.054	0.231046	2.60277	0.019127	0.145785	-3.57815		Tet1	3.21479	2.99752	2.7328	0.0146539	0.111695	-3.18497
Zfyve1	3.03394	2.93785	2.53501	0.0219489	0.166886	-3.27291		Ebi3	1.88481	3.14981	2.60221	0.0191489	0.145785	-3.06803		Gpx1	-0.434197	8.02278	-2.73161	0.0146896	0.111889	-3.53037
Adam10	0.525709	7.67024	2.53496	0.0219513	0.166886	-4.06189		Snrpb	-0.301286	8.68915	-2.60144	0.0191788	0.145785	-4.11656		Uqcr10	0.493577	7.3831	2.73073	0.0147163	0.112015	-3.37202
Mrpl27	0.815427	5.85373	2.53489	0.0219543	0.166886	-3.55612		Gm3604	-2.75481	2.57082	-2.60143	0.0191793	0.145785	-3.2178		Rpl9	-0.235651	9.92818	-2.7295	0.0147536	0.112173	-4.0411
2010015L04Rik	-1.26633	4.18702	-2.53486	0.0219558	0.166886	-3.18969		Sbk1	-1.51749	3.98867	-2.60142	0.0191797	0.145785	-3.0655		Pdss1	3.83966	1.62712	2.72937	0.0147577	0.112173	-3.37153
Pear1	1.00822	6.01466	2.53119	0.0221194	0.168012	-3.57819		Diap3	-3.1105	1.46498	-2.60101	0.0191957	0.145804	-3.24928		Gramd4	2.21389	4.41201	2.72746	0.0148157	0.112536	-2.90942
Tmem106b	-0.784809	6.40517	-2.53021	0.0221634	0.168229	-3.73212		Nme2	-0.444858	7.72037	-2.60023	0.0192264	0.145936	-3.8817		Oas3	-1.01678	5.4249	-2.72678	0.0148366	0.112616	-3.03478
Ptms	2.05286	3.6043	2.52843	0.0222433	0.168718	-3.19222		Rdx	-0.887662	6.38983	-2.59885	0.0192804	0.146033	-3.46011		Ubash3a	0.626859	6.58104	2.72629	0.0148514	0.11265	-3.27147
Reps1	1.74903	3.5235	2.52768	0.0222773	0.168859	-3.17987		Ncf4	0.534755	7.09991	2.59852	0.0192935	0.146033	-3.70554		Usp15	0.772418	6.41781	2.72459	0.0149037	0.112968	-3.18099
Med8	0.590875	5.90334	2.5265	0.0223305	0.169145	-3.5897		Tmem194b	0.851862	5.50405	2.59827	0.0193033	0.146033	-3.35261		Nlrc5	0.50851	7.59991	2.72359	0.0149343	0.113121	-3.49823
Slc43a3	4.06615	2.64446	2.52579	0.0223626	0.16927	-3.37081		Papd7	-3.15969	2.84748	-2.59815	0.0193078	0.146033	-3.2115		Slc43a3	4.32469	2.64446	2.71806	0.0151053	0.114265	-3.40127
Sec22a	2.14181	4.51737	2.5252	0.0223893	0.169355	-3.20754		Mcfd2	0.977258	5.52018	2.59778	0.0193224	0.146033	-3.27176		Chtf18	3.39411	2.32623	2.71803	0.0151062	0.114265	-3.19942
Mx1	4.00607	1.68999	2.52269	0.0225032	0.17006	-3.37846		Dbf4	-1.15439	3.73542	-2.5976	0.0193294	0.146033	-3.2213		Dhx16	0.77872	6.04406	2.71521	0.015194	0.11485	-3.09673
Alg5	-0.711682	6.30002	-2.52246	0.0225137	0.17006	-3.69415		Nfkbie	0.895228	6.15533	2.59752	0.0193328	0.146033	-3.46817		Stambpl1	-0.80777	6.07286	-2.71424	0.0152244	0.115	-3.09725
BC052040	-1.34521	3.90104	-2.52191	0.0225385	0.17013	-3.20846		Ankle1	-3.56951	1.97159	-2.59708	0.01935	0.146062	-3.19937		Pigp	-0.979146	5.58355	-2.71348	0.0152482	0.115021	-2.98048
Adora2a	-1.30866	5.83584	-2.52124	0.0225693	0.170244	-3.5718		Apobr	-2.0951	4.31948	-2.59589	0.0193968	0.146297	-3.07574		Nagpa	-1.00082	5.91769	-2.71348	0.0152483	0.115021	-3.07251
Zfp74	4.7481	0.196789	2.52031	0.0226115	0.170445	-3.57736		Msra	1.28087	5.68188	2.59561	0.0194079	0.146297	-3.29574		Eomes	4.96417	0.134623	2.71274	0.0152715	0.115116	-3.65066
Tk1	1.92481	5.00288	2.51908	0.022668	0.170753	-3.21637		Tep1	0.752913	6.10736	2.59428	0.0194607	0.146593	-3.43378		Cdk2ap2	-0.364926	9.23918	-2.71215	0.0152898	0.115175	-3.82437
Ccl5	-0.942146	10.8998	-2.51817	0.0227097	0.170949	-4.67205		Vdr	3.42989	1.5019	2.59389	0.0194759	0.146607	-3.14341		Rgs1	-0.637463	6.83127	-2.71081	0.0153323	0.115415	-3.36565
Mbd5	1.70992	3.58531	2.51708	0.0227596	0.171206	-3.19551		Fam92a	0.990721	4.57524	2.59342	0.0194945	0.146646	-3.17808		Fau	-0.253318	10.7491	-2.70868	0.0153995	0.115841	-4.32572
Anp32e	0.866449	6.51108	2.51647	0.0227877	0.1713	-3.69007		Ppp1r15b	-0.996232	6.32703	-2.59163	0.0195659	0.147074	-3.46317		Dst	4.69559	1.23141	2.70768	0.0154309	0.115963	-3.62851
Psmg1	0.696576	5.54452	2.51529	0.022842	0.17159	-3.50893		Il15	-4.82976	-1.59031	-2.59131	0.0195784	0.147074	-3.67635		Sh3bp5	-1.86234	3.5605	-2.7075	0.0154369	0.115963	-2.95636
Tank	0.667339	6.05382	2.51446	0.0228806	0.171682	-3.71344		Sugt1	-0.523532	6.47161	-2.58999	0.0196312	0.147368	-3.57		Stk3	-4.27312	2.2641	-2.70655	0.0154668	0.116108	-3.40621
Klk8	-0.69489	6.3017	-2.51403	0.0229003	0.171682	-3.71184		Ptprv	2.61354	4.64956	2.58966	0.0196445	0.147368	-3.08404		Tecpr1	-0.544623	7.20049	-2.70603	0.0154836	0.116154	-3.43319
Reep5	0.612863	7.37238	2.51401	0.0229014	0.171682	-3.89429		Ddx6	0.721271	6.12131	2.58792	0.0197141	0.14773	-3.50241		Metap1d	-1.89909	3.76738	-2.70392	0.0155509	0.116578	-3.04099
Pop7	0.785509	5.46876	2.51313	0.022942	0.171859	-3.47336		Prep	-0.649412	6.30249	-2.58778	0.0197199	0.14773	-3.50069		Pde7a	-0.95415	4.56784	-2.70049	0.0156608	0.117322	-2.94612
Antxr2	-0.719089	6.33479	-2.5128	0.0229573	0.171859	-3.77831		Gpr65	-0.94377	6.38092	-2.58635	0.0197771	0.147973	-3.42715		1110038F14Rik	-0.615175	6.0045	-2.69734	0.0157624	0.118002	-3.15767
Otud7b	1.64075	3.63632	2.51248	0.0229723	0.171859	-3.20472		Blcap	1.46653	4.1792	2.58629	0.0197795	0.147973	-3.09054		Nfkbiz	0.739361	5.65723	2.69664	0.0157851	0.118041	-3.03665
Sept8	-2.95338	3.27766	-2.50422	0.0233587	0.17463	-3.24871		Exoc8	-2.94812	3.59023	-2.58591	0.0197948	0.147986	-3.17931		Gclc	-1.72924	3.82179	-2.69631	0.0157959	0.118041	-2.94551
Ptpn18	-0.434058	8.25881	-2.50294	0.0234189	0.174961	-4.24767		Pde11a	2.77774	2.21695	2.58546	0.0198132	0.148022	-3.38096		Haus3	0.751994	6.07456	2.69604	0.0158046	0.118041	-3.12017
Tctex1d2	3.84741	-1.41275	2.50228	0.0234503	0.175075	-3.68341		Rgs16	3.44788	1.51627	2.58449	0.0198521	0.148212	-3.22944		5330426P16Rik	1.3689	3.75319	2.69584	0.0158109	0.118041	-2.94326
Trerf1	1.7956	4.65563	2.50088	0.0235164	0.175449	-3.26337		Sh3glb2	0.734306	5.79246	2.58416	0.0198657	0.148212	-3.44095		S100a1	3.33787	2.03998	2.69491	0.0158411	0.11811	-3.42528
Sh3tc1	-5.16534	1.05558	-2.49857	0.0236265	0.176013	-3.57647		Bbs9	-2.98908	3.82883	-2.58275	0.0199227	0.148536	-3.16314		Slamf7	0.364972	7.32387	2.6949	0.0158417	0.11811	-3.64446
H2-Q1	3.18951	0.732794	2.49802	0.0236527	0.176013	-3.49662		Chtf18	-3.29013	2.32623	-2.58185	0.019959	0.148705	-3.22321		Ifi35	-0.426339	6.84654	-2.69285	0.0159083	0.118525	-3.36557
Cd52	0.237126	11.52	2.498	0.0236536	0.176013	-5.20699		Rcbtb1	-0.79296	5.63185	-2.58143	0.019976	0.148708	-3.40523		Dnajb9	-1.0095	5.06531	-2.6912	0.0159624	0.118847	-2.94371
Gltpd1	2.20065	3.64207	2.49794	0.0236565	0.176013	-3.22742		Hist1h2bj	-2.8483	1.54788	-2.58088	0.0199986	0.148708	-3.35135		Ipcef1	0.630414	6.66615	2.69084	0.0159743	0.118854	-3.2308
Slc16a13	3.48055	1.66996	2.49683	0.0237092	0.176285	-3.45581		Dzip1	2.06323	4.08081	2.58038	0.0200187	0.148708	-3.11678		Mms22l	2.07921	4.43075	2.68957	0.0160159	0.119038	-2.95225
Comt	0.516363	6.64429	2.49583	0.0237572	0.176521	-3.84787		Rab8a	-0.525095	7.69774	-2.58024	0.0200247	0.148708	-3.86467		Tceal3	-4.52262	-0.546478	-2.68942	0.0160208	0.119038	-3.76293
Fam102a	-1.14501	6.21149	-2.49495	0.0237993	0.17665	-3.66693		Erlin1	4.1795	0.831613	2.5801	0.0200303	0.148708	-3.36123		1810037I17Rik	0.593391	6.66741	2.68807	0.0160651	0.119286	-3.29417
Dock10	-0.748794	7.51548	-2.49472	0.0238103	0.17665	-4.02269		Fbxo48	-3.96562	-1.09923	-2.5795	0.0200547	0.148708	-3.64471		Abce1	-0.578518	6.75682	-2.68731	0.0160903	0.119392	-3.37102
2700054A10Rik	-2.78095	0.60088	-2.49446	0.0238231	0.17665	-3.583		Slc1a5	0.364937	8.6489	2.5795	0.0200549	0.148708	-4.16045		BC005561	-2.33008	3.83226	-2.68668	0.0161113	0.119443	-3.08154
0910001L09Rik	0.596447	5.99987	2.49337	0.0238755	0.176919	-3.71116		Jak3	0.588209	7.29868	2.57862	0.0200905	0.148812	-3.83638		Wdr24	1.21628	5.67482	2.68644	0.0161191	0.119443	-3.0433
Ddx24	0.441655	7.76471	2.49299	0.0238937	0.176933	-4.20553		Cdc25b	-0.787704	6.6289	-2.57848	0.0200961	0.148812	-3.74459		Cbfa2t3	3.14525	2.27847	2.68599	0.016134	0.119473	-3.38223
Slc12a4	2.83943	3.50574	2.49097	0.0239913	0.177327	-3.26504		C630004H02Rik	-4.20594	2.71732	-2.57471	0.0202511	0.149858	-3.26376		0610009L18Rik	4.22894	0.620487	2.68544	0.0161522	0.119526	-3.72143
Ahnak	0.66431	7.43681	2.49088	0.0239956	0.177327	-3.92162		9930111J21Rik1	-0.75514	5.91276	-2.57285	0.0203276	0.1502	-3.43787		Mdm1	3.41708	2.18921	2.68457	0.0161809	0.119621	-3.19415
Cklf	-0.737664	5.95137	-2.4908	0.0239993	0.177327	-3.65504		Unc5cl	-1.18929	5.07149	-2.57284	0.020328	0.1502	-3.17498		Gpd1l	0.843177	5.15652	2.68439	0.016187	0.119621	-3.06517
Psma1	0.369504	8.43113	2.49054	0.0240118	0.177327	-4.29055		Ccz1	-0.955788	5.86583	-2.57258	0.0203386	0.1502	-3.39995		Rpl14	-0.320576	9.65816	-2.68279	0.0162404	0.119898	-4.06601
Sarm1	4.97707	-1.36308	2.48957	0.0240587	0.177456	-3.69317		Ftl1	0.271384	10.3363	2.57214	0.0203571	0.150235	-4.6411		Rassf1	1.06377	5.48898	2.68261	0.0162464	0.119898	-3.05743
Tk2	-0.579596	6.5562	-2.48951	0.0240618	0.177456	-3.86883		Akap11	2.03356	4.49879	2.57141	0.0203872	0.150355	-3.11597		Purb	0.933889	4.74901	2.68143	0.0162857	0.120107	-2.9759
Txn1	0.407451	7.986	2.48892	0.0240904	0.177521	-4.17206		Mcmbp	-0.532448	7.45024	-2.57054	0.0204232	0.150479	-3.84698		2810403A07Rik	-0.525503	7.30523	-2.67916	0.0163617	0.120518	-3.4816
Zfp719	-3.19789	3.95841	-2.48866	0.0241032	0.177521	-3.25063		Morn1	3.96897	0.361267	2.5703	0.020433	0.150479	-3.53754		Gpsm3	-0.383091	7.53243	-2.6791	0.0163636	0.120518	-3.5206
Socs1	-0.588331	5.95551	-2.48805	0.0241327	0.177619	-3.70181		Lsm5	-0.65743	6.28678	-2.57001	0.0204452	0.150479	-3.53439		Sh3gl3	-4.53289	1.17164	-2.67868	0.0163778	0.120534	-3.75021
Gpr18	-0.764727	6.94043	-2.48658	0.0242042	0.178025	-3.90225		Nom1	-1.04989	5.32753	-2.56928	0.0204755	0.1506	-3.31245		Setd7	-1.70218	4.03734	-2.67838	0.0163877	0.120534	-3.00786
Pomp	0.38097	7.80756	2.48598	0.0242335	0.17812	-4.16324		Lrrc40	1.17939	4.30387	2.5668	0.0205787	0.151257	-3.15061		Cnot6l	-0.734777	6.51696	-2.67643	0.0164534	0.120936	-3.26613
Mcm5	0.707837	6.81809	2.48519	0.0242722	0.178285	-3.82509		Kpna3	-0.613237	6.5378	-2.56596	0.0206143	0.151416	-3.65708		St3gal1	1.54244	5.27153	2.67549	0.0164851	0.121087	-2.95398
Hectd2	3.65425	0.66433	2.48462	0.0243001	0.17837	-3.63118		Osbpl5	-0.946127	5.29737	-2.56515	0.020648	0.151509	-3.34549		Cenpp	3.46358	0.119841	2.67485	0.016507	0.121099	-3.50849
Usp20	-1.09483	5.11405	-2.48363	0.0243485	0.178575	-3.39544		Gpr68	-2.54699	5.39938	-2.56499	0.0206547	0.151509	-3.15808		Nop14	-0.823975	5.34026	-2.67479	0.0165089	0.121099	-3.09158
Nelf	3.07286	4.14625	2.48338	0.0243608	0.178575	-3.2572		Gmfb	-0.635353	6.9865	-2.56438	0.0206803	0.151563	-3.71374		Tnk2	-1.15209	4.52995	-2.67314	0.0165647	0.121426	-2.95933
Bpgm	1.1819	4.48051	2.48156	0.0244504	0.179111	-3.37334		Cggbp1	-0.837637	6.93615	-2.56415	0.0206898	0.151563	-3.71848		P2rx4	-2.06496	4.78751	-2.67257	0.0165843	0.121482	-2.95362
Tmx3	-0.701341	6.64649	-2.48092	0.0244816	0.17922	-3.88084		Faah	0.639319	7.17087	2.56309	0.0207347	0.151785	-3.74367		Gm11648	1.89049	3.78139	2.67227	0.0165945	0.121482	-3.10101
Rpl27a	-0.29226	9.88449	-2.47839	0.0246068	0.180016	-4.7639		Prkcq	0.317322	8.38759	2.56277	0.0207479	0.151785	-4.11326		Fancg	3.40185	3.51624	2.67153	0.0166197	0.121584	-3.22153
Zfp82	3.79731	1.78367	2.4776	0.0246459	0.180032	-3.50681		Ppm1g	-0.402715	7.50355	-2.56189	0.0207852	0.151892	-3.90922		Btla	-0.851136	6.47859	-2.67067	0.0166489	0.121717	-3.16624
Rab18	-0.526949	6.83233	-2.47748	0.0246521	0.180032	-3.96281		Cox18	1.008	4.71644	2.56177	0.0207904	0.151892	-3.22415		Supt16h	1.01657	5.84112	2.66887	0.0167104	0.122084	-3.13452
Abcc4	1.07073	5.44386	2.47735	0.0246585	0.180032	-3.49916		Ankrd13a	-0.756809	5.99662	-2.5606	0.0208398	0.152151	-3.50505		Pnpo	-1.0249	5.40966	-2.66848	0.0167239	0.122101	-3.03315
Immt	-0.594608	7.00443	-2.47697	0.0246774	0.180049	-3.92654		2410089E03Rik	1.95488	3.35654	2.55964	0.0208801	0.152251	-3.17216		Cxcr5	4.0674	2.8463	2.66741	0.0167606	0.122288	-3.79366
0610009L18Rik	3.99536	0.620487	2.47609	0.0247208	0.180246	-3.64671		Gnb2l1	-0.352232	9.15289	-2.55956	0.0208838	0.152251	-4.31611		Rftn1	-0.556948	7.05499	-2.6659	0.0168123	0.122583	-3.46587
Myo6	-2.25958	4.07789	-2.4755	0.0247504	0.180333	-3.25829		Rbm38	-0.628518	7.79877	-2.55929	0.0208953	0.152251	-3.9947		Ptgs1	4.34799	0.598726	2.66528	0.0168337	0.122657	-3.46172
Gbe1	-0.764864	5.56447	-2.47519	0.0247658	0.180333	-3.64062		1700011J10Rik	1.73047	3.57236	2.55699	0.0209929	0.152837	-3.15184		Mesdc2	-0.742593	6.3057	-2.66337	0.0168998	0.123056	-3.26539
Brap	-0.710427	6.19434	-2.47456	0.0247969	0.180438	-3.74278		Dscc1	-3.2168	1.59587	-2.55673	0.0210038	0.152837	-3.26006		Csrp1	0.860276	6.03029	2.66251	0.0169297	0.123192	-3.20586
Optn	4.30713	1.41437	2.47399	0.0248255	0.180438	-3.55106		Ctdsp1	-0.703878	6.00894	-2.55581	0.021043	0.153021	-3.48647		Cct7	0.313746	8.49569	2.66086	0.016987	0.123526	-3.80409
Sh3kbp1	0.455386	8.70464	2.47391	0.0248299	0.180438	-4.43698		Arpc3	0.508283	7.30483	2.55509	0.0210738	0.153098	-3.83872		Acot13	-0.750822	5.88087	-2.65934	0.0170397	0.123792	-3.1311
Slc25a33	3.17849	3.06289	2.47355	0.0248475	0.180446	-3.35172		Fxyd5	-0.429603	9.49234	-2.55491	0.0210817	0.153098	-4.45836		Mtmr3	1.79159	4.79324	2.65916	0.0170462	0.123792	-2.97459
Spata13	0.679572	8.12178	2.47192	0.0249295	0.180921	-4.25962		Pla2g12a	2.04732	2.32894	2.55454	0.0210972	0.153109	-3.14774		Setmar	4.81295	0.504272	2.65842	0.017072	0.123897	-3.62995
Gpr155	1.67824	4.87518	2.47046	0.0250025	0.181195	-3.47608		Wdr13	1.67445	4.37866	2.55288	0.0211686	0.153525	-3.16449		Cyb5r3	-0.628999	6.9236	-2.65792	0.0170895	0.123941	-3.36173
Bcs1l	1.07781	4.16631	2.47017	0.0250171	0.181195	-3.32605		Fam162a	0.664642	6.15289	2.55204	0.0212048	0.153596	-3.57644		Wasl	-0.893046	5.02715	-2.65662	0.017135	0.124189	-3.02804
Mars	0.658588	6.10653	2.46974	0.0250388	0.181195	-3.72606		Pstpip1	0.595771	6.35764	2.552	0.0212066	0.153596	-3.57841		Cby1	2.67148	3.79381	2.65625	0.0171479	0.124193	-3.1241
Parp11	-0.895806	5.64587	-2.46957	0.0250473	0.181195	-3.65351		Map4k1	0.514692	7.40834	2.5515	0.0212278	0.153648	-3.94279		Rpl32	-0.233185	10.4351	-2.65596	0.0171583	0.124193	-4.34879
Scml4	-1.93204	5.12675	-2.46951	0.0250502	0.181195	-3.35338		Wnt10a	3.98378	0.363119	2.55047	0.0212722	0.153868	-3.52302		L2hgdh	-3.1901	2.00895	-2.65267	0.0172742	0.124949	-3.32092
Dennd1b	-1.12826	5.44868	-2.4689	0.0250811	0.181298	-3.4661		Slc25a35	3.06364	2.14981	2.5496	0.0213097	0.153973	-3.35015		Wbp5	0.922013	5.32204	2.64902	0.0174034	0.125729	-3.05787
L2hgdh	-3.00816	2.00895	-2.46789	0.0251319	0.181545	-3.35575		Ildr1	-3.41605	0.246285	-2.54948	0.021315	0.153973	-3.38197		2210009G21Rik	2.98898	1.99662	2.64867	0.017416	0.125729	-3.50207
Map3k4	-0.966448	5.22235	-2.46638	0.0252087	0.18198	-3.53284		Slc9a7	-2.20529	2.82695	-2.54824	0.0213687	0.154259	-3.1914		Syne2	-1.51678	5.17011	-2.64865	0.0174166	0.125729	-3.04217
Kdm4d	-1.84624	2.44292	-2.4642	0.0253194	0.182508	-3.31905		Ppm1f	3.71078	3.1544	2.54704	0.0214205	0.15453	-3.2915		Cdk5rap3	-0.708406	7.01353	-2.64512	0.017543	0.126557	-3.4792
Lrrc56	4.37382	0.247922	2.46412	0.0253235	0.182508	-3.65218		Ccnd2	0.239269	9.63503	2.54618	0.021458	0.154699	-4.41783		Aven	3.05769	1.98838	2.64018	0.0177212	0.127735	-3.50144
Atp5a1	0.254557	9.57455	2.46391	0.0253337	0.182508	-4.66541		Mrpl52	0.604258	6.43394	2.54354	0.0215729	0.155394	-3.63951		Zfp953	2.79539	2.61482	2.63994	0.0177296	0.127735	-3.34243
Fau	-0.236776	10.7491	-2.46362	0.0253487	0.182508	-5.02619		1600014C10Rik	-0.876184	6.79683	-2.54332	0.0215829	0.155394	-3.64661		Klrc3	3.17083	-0.480232	2.63953	0.0177445	0.127758	-3.58064
Ctr9	-1.13961	5.87716	-2.46189	0.0254368	0.183021	-3.64936		Gm16702	-1.15276	4.42136	-2.54209	0.0216367	0.155679	-3.18072		Atp5a1	0.265855	9.57455	2.63813	0.0177954	0.127815	-4.10711
Slc25a23	-4.50269	0.426363	-2.4614	0.0254619	0.183081	-3.6147		Pdzd11	0.622726	6.03841	2.54149	0.0216628	0.155764	-3.57962		Rbm25	-0.366579	7.70024	-2.63812	0.0177957	0.127815	-3.65497
Clptm1l	-0.649243	6.98189	-2.45958	0.0255554	0.183632	-3.98364		Tspan31	0.898371	5.35237	2.54104	0.0216826	0.155797	-3.38901		5730494N06Rik	-0.934023	6.07367	-2.63807	0.0177978	0.127815	-3.23778
Nfatc2	1.00629	6.00819	2.45871	0.0255998	0.18371	-3.78118		Lims1	0.35563	7.83167	2.54074	0.0216959	0.155797	-4.0378		Aasdhppt	-0.706543	5.71393	-2.63803	0.0177992	0.127815	-3.1808
Anks3	0.852012	5.24394	2.45849	0.0256115	0.18371	-3.54682		Pik3cd	-0.575365	8.0013	-2.53869	0.021786	0.15629	-4.01834		Sepp1	0.620274	7.37196	2.63699	0.0178371	0.128002	-3.59294
Ncoa7	1.21453	4.54876	2.45838	0.0256167	0.18371	-3.4232		Itpkc	-3.51796	0.921161	-2.53853	0.0217933	0.15629	-3.56025		Myo5a	3.36116	2.05951	2.63656	0.0178526	0.128029	-3.37981
Setdb1	1.07696	5.09561	2.45664	0.0257066	0.184234	-3.45872		Decr1	1.62052	4.64903	2.53694	0.0218635	0.156604	-3.25121		2310061I04Rik	0.910764	5.22486	2.63467	0.0179219	0.128394	-3.06471
Cpne8	0.656144	5.05071	2.45471	0.0258063	0.184827	-3.54959		Pvrl1	3.90351	-0.933923	2.5367	0.0218739	0.156604	-3.69902		Uros	-1.37419	5.05364	-2.63453	0.0179269	0.128394	-3.03747
Slc9a6	1.88018	3.38245	2.45339	0.0258751	0.184917	-3.29921		D330028D13Rik	4.73048	-1.79708	2.53652	0.0218822	0.156604	-3.72757		Zdhhc2	4.15388	1.87531	2.63367	0.0179586	0.128536	-3.58726
Gm10406	3.06582	0.0951697	2.45337	0.0258758	0.184917	-3.63379		Rtn3	0.436981	7.05265	2.53622	0.0218956	0.156604	-3.87752		Fuca1	-0.587271	6.42126	-2.63325	0.0179739	0.128562	-3.34129
Ccbl2	4.1976	1.12644	2.45324	0.0258827	0.184917	-3.56066		Abcf1	-0.441116	7.0494	-2.53592	0.0219088	0.156604	-3.82086		Samhd1	-0.331843	7.57129	-2.63276	0.0179918	0.128605	-3.72065
Ddx21	0.667087	6.56199	2.45291	0.0258996	0.184917	-3.88498		Usp42	0.933955	5.04545	2.53455	0.0219695	0.156935	-3.27728		Tecr	-0.356891	8.55658	-2.63173	0.0180296	0.128791	-3.8569
Zfp318	4.56866	-0.0474478	2.45284	0.0259037	0.184917	-3.73954		Klk1b8	3.29007	-0.685738	2.53213	0.0220775	0.157603	-3.53641		Rps28	-0.296009	9.63859	-2.63011	0.0180893	0.129134	-4.15368
Ncoa4	-0.597517	6.9685	-2.44851	0.0261297	0.186288	-4.00306		Mrps14	-0.549088	7.39698	-2.53067	0.0221425	0.157956	-3.88576		Slc39a13	1.22537	3.97442	2.62882	0.0181371	0.12939	-3.02816
Mylip	-0.899494	5.64015	-2.44851	0.0261298	0.186288	-3.67039		Sppl3	-0.880414	5.05812	-2.53029	0.0221596	0.157956	-3.34465		Rap1a	0.385906	7.63142	2.62848	0.0181499	0.129397	-3.61846
Mark2	-0.745121	6.64157	-2.44747	0.0261842	0.186554	-3.88363		Grik5	4.20169	-0.926902	2.53006	0.0221702	0.157956	-3.67474		Klra10	3.53464	-0.771564	2.62786	0.0181728	0.129475	-3.66601
Rpl23a	-0.319854	8.76867	-2.44705	0.0262065	0.186591	-4.4949		Hs6st1	4.76173	0.419538	2.52827	0.0222504	0.158423	-3.61688		0610007P14Rik	0.99917	6.16569	2.62745	0.0181878	0.129498	-3.27067
Pias1	-0.779025	6.72442	-2.44667	0.0262262	0.18661	-3.95961		Pydc4	-0.535945	7.11043	-2.52768	0.0222771	0.15851	-3.74117		Paox	-3.3531	2.98301	-2.62595	0.0182438	0.129812	-3.33697
Myl12b	-0.25571	9.90533	-2.44619	0.0262513	0.186666	-4.81402		Tlr2	4.93914	-1.38548	2.52721	0.0222982	0.158557	-3.72843		Psmc3ip	4.95778	0.707405	2.62468	0.0182912	0.130064	-3.71133
Ercc4	0.840938	5.479	2.44368	0.0263837	0.187486	-3.61875		Gm13546	-3.49511	-1.04532	-2.52592	0.0223567	0.158856	-3.62022		Kif1b	1.41907	3.6645	2.62301	0.0183535	0.130423	-3.04125
Fert2	4.60274	-1.77968	2.44308	0.0264159	0.187592	-3.74249		Rtp4	0.715072	6.58749	2.52564	0.0223694	0.158856	-3.54598		Was	-0.507111	6.74106	-2.62228	0.018381	0.130532	-3.45209
Bysl	-0.886905	5.1912	-2.44024	0.0265667	0.188541	-3.55506		Ube2t	-1.30142	3.5159	-2.52517	0.0223906	0.158867	-3.18893		Ppm1k	-1.10188	5.30051	-2.62039	0.018452	0.130952	-3.15098
Cse1l	0.586893	7.06558	2.43966	0.0265975	0.188544	-3.99232		Ptpn4	-2.56487	2.62008	-2.52496	0.0224	0.158867	-3.25307		Akap11	-2.0333	4.49879	-2.62004	0.0184652	0.13096	-3.0461
Zfp513	3.20141	2.51227	2.43936	0.0266132	0.188544	-3.40712		Peg13	1.46286	5.28358	2.52407	0.0224404	0.158947	-3.29997		Il3ra	2.41896	2.73172	2.61926	0.0184945	0.131083	-3.38075
Fam19a3	-4.50583	-0.772881	-2.43906	0.0266292	0.188544	-3.71342		Sirt4	3.25137	2.01851	2.52407	0.0224405	0.158947	-3.34495		Suz12	1.38308	4.68394	2.61836	0.0185288	0.13124	-3.04185
1700021K19Rik	3.3104	2.37715	2.43893	0.0266362	0.188544	-3.43943		Cog3	-1.3326	5.35028	-2.52296	0.0224907	0.159151	-3.34501		Man2a1	2.01958	3.80687	2.61775	0.0185516	0.131317	-3.08368
Mef2a	-0.993647	5.48887	-2.4382	0.0266753	0.188698	-3.50893		Tnfrsf26	0.525386	6.92099	2.52279	0.0224984	0.159151	-3.79009		Alyref	1.45532	4.69487	2.61687	0.018585	0.131468	-3.05482
1700020L24Rik	3.73398	0.337735	2.436	0.0267931	0.189409	-3.71661		Ctsa	-0.323636	8.50778	-2.5221	0.0225299	0.159259	-4.24444		Fam134a	-0.857268	6.55355	-2.61495	0.0186579	0.131899	-3.40317
Cd274	0.710491	5.25726	2.43507	0.026843	0.189576	-3.62038		Ccdc104	1.07419	4.97095	2.52152	0.0225566	0.159259	-3.28725		4932438A13Rik	-0.642377	6.99298	-2.61447	0.0186761	0.131942	-3.54295
Rdh12	4.2597	1.43739	2.43491	0.0268515	0.189576	-3.49523		Rhbdd3	4.53203	1.24635	2.5215	0.0225574	0.159259	-3.5056		Zfp82	3.98524	1.78367	2.61351	0.0187128	0.132115	-3.61529
Egln3	3.51828	0.0969355	2.43459	0.0268688	0.189576	-3.53035		Anapc11	-0.559829	6.57551	-2.52033	0.0226106	0.159511	-3.70929		Ppp2r5c	0.286821	8.55137	2.61263	0.0187463	0.13225	-3.92547
Psen2	0.56041	7.20549	2.4337	0.0269168	0.189791	-4.12916		Ubxn11	-1.09493	4.59045	-2.52008	0.0226223	0.159511	-3.23623		Map3k4	-0.972612	5.22235	-2.61238	0.0187561	0.13225	-3.15419
Hcls1	-0.379123	7.95283	-2.4332	0.0269438	0.189859	-4.29753		Man1c1	-3.62022	0.96551	-2.51963	0.0226428	0.159552	-3.43793		Gm9320	-0.440507	7.28166	-2.6117	0.0187819	0.132346	-3.60478
Fuca2	0.673083	6.50691	2.43148	0.0270367	0.190259	-3.94567		Slc10a3	0.738472	5.94219	2.51879	0.022681	0.159718	-3.53149		Atp5h	0.295119	8.77288	2.61101	0.0188084	0.132447	-3.97482
Wdfy2	3.10332	1.64857	2.4314	0.0270413	0.190259	-3.49076		Nbr1	0.873579	5.81193	2.51681	0.022772	0.160134	-3.53108		Samd10	1.12933	5.72659	2.61024	0.0188379	0.13257	-3.17354
Apitd1	3.46001	1.56093	2.43093	0.0270665	0.190259	-3.59032		Pyhin1	-0.530228	8.2901	-2.51661	0.0227813	0.160134	-4.16295		Arap3	2.86573	2.55743	2.60902	0.018885	0.132717	-3.2472
Unkl	0.574593	5.88492	2.43046	0.0270921	0.190259	-3.77015		Rhoq	-3.93507	1.35358	-2.51655	0.022784	0.160134	-3.64904		Mbnl3	0.757551	6.04737	2.60862	0.0189004	0.132717	-3.32303
Cd82	-0.298754	9.34346	-2.43041	0.027095	0.190259	-4.76026		Cry1	-2.38023	4.63546	-2.5162	0.0228004	0.160146	-3.19709		2700007P21Rik	-0.722191	5.89992	-2.60858	0.018902	0.132717	-3.26248
Cdca3	3.0544	4.25238	2.43015	0.027109	0.190259	-3.3552		Rgs1	-0.748555	6.83127	-2.51364	0.0229187	0.160786	-3.70271		Fam89b	0.475949	6.79633	2.60843	0.0189075	0.132717	-3.52961
Cby1	2.51493	3.79381	2.42964	0.0271369	0.190259	-3.33474		Atg10	1.37176	4.34867	2.51333	0.022933	0.160786	-3.23278		Macf1	0.518414	7.53845	2.60787	0.0189294	0.132786	-3.67045
Hace1	1.13836	5.31839	2.42958	0.0271401	0.190259	-3.53235		Ttc37	1.93729	4.02777	2.51327	0.0229358	0.160786	-3.20314		Acsf3	-2.09143	3.98189	-2.60659	0.0189786	0.133045	-3.15437
D6Wsu163e	3.30277	3.2827	2.4282	0.0272148	0.190661	-3.3873		Stx17	-1.38573	4.41285	-2.51189	0.0229998	0.161121	-3.21143		Rab6b	-3.22323	2.09571	-2.60519	0.0190328	0.13334	-3.40729
Disc1	-3.7493	1.37277	-2.42787	0.0272331	0.190666	-3.5685		Pih1d1	-1.01957	5.63232	-2.5116	0.023013	0.161121	-3.46808		Sgms1	-0.914968	5.54102	-2.60457	0.019057	0.133423	-3.20241
2900010M23Rik	-0.602992	5.76072	-2.42703	0.0272787	0.190761	-3.73019		Kars	-0.44892	7.21652	-2.51014	0.0230809	0.161352	-3.87022		Rnf219	1.07059	5.14444	2.60122	0.0191874	0.134227	-3.10231
Hnrnph2	-0.517043	7.30168	-2.42698	0.0272815	0.190761	-4.12348		Tlcd2	2.66965	2.19158	2.50963	0.0231046	0.161352	-3.39694		1700037C18Rik	3.82857	0.650139	2.60099	0.0191963	0.134227	-3.79112
0610038L08Rik	-3.54426	-0.512549	-2.42637	0.0273147	0.190871	-3.69831		Npat	-1.14309	5.24401	-2.50958	0.0231069	0.161352	-3.36754		Brms1l	1.11667	4.48055	2.59995	0.0192371	0.134377	-3.07192
Zfp148	-0.607424	6.58931	-2.42551	0.0273619	0.190999	-3.95637		Auh	-1.02859	4.91024	-2.5094	0.0231156	0.161352	-3.30043		Enpp5	-7.02124	1.50042	-2.59981	0.0192425	0.134377	-3.70705
Hps3	-1.26361	5.0502	-2.4254	0.0273681	0.190999	-3.50414		Aurkb	-1.51702	4.33666	-2.50915	0.023127	0.161352	-3.3824		Tmem167	0.441297	7.46149	2.59818	0.0193068	0.134733	-3.65782
Zfp672	-0.670906	5.4247	-2.4227	0.0275162	0.191815	-3.71161		Gnai2	-0.314514	8.2407	-2.50899	0.0231347	0.161352	-4.21186		Upf3b	-0.835018	5.09571	-2.5976	0.0193297	0.134733	-3.11748
Ireb2	-0.999092	5.27902	-2.42263	0.0275202	0.191815	-3.58782		Zfp652	-4.59824	-0.16779	-2.507	0.0232277	0.161854	-3.71248		Tmem181b-ps	-0.75892	6.22586	-2.59722	0.0193446	0.134733	-3.30692
Lbp	-4.61254	-1.54074	-2.42179	0.0275662	0.191964	-3.73757		Gtf2i	0.39906	7.78553	2.50664	0.0232446	0.161854	-4.11621		Limd1	0.868756	6.41048	2.59697	0.0193545	0.134733	-3.39253
Wnt10a	3.68	0.363119	2.4216	0.0275767	0.191964	-3.56944		Dph3	-0.681581	5.91394	-2.5065	0.0232512	0.161854	-3.57872		Tmed5	0.429179	7.37578	2.59695	0.0193552	0.134733	-3.68449
Ndfip1	0.287143	8.77114	2.41972	0.0276808	0.192499	-4.58941		Rad21	-0.714919	5.77599	-2.50457	0.0233419	0.162382	-3.58287		Fcgr2b	4.80121	-1.1491	2.59663	0.0193679	0.134736	-3.83659
Camk1d	-1.4132	5.0527	-2.41936	0.0277004	0.192499	-3.45494		Stat6	-0.595229	7.76814	-2.50384	0.0233763	0.162517	-4.05948		Polr3a	-1.34168	4.88268	-2.59607	0.0193898	0.134802	-3.11891
Fmnl3	3.49825	3.83958	2.41925	0.0277065	0.192499	-3.34424		Dstyk	4.17178	2.39353	2.50323	0.0234051	0.162534	-3.44377		Hdac6	3.86999	1.58738	2.59032	0.019618	0.136302	-3.4899
Rev1	-2.6771	1.76733	-2.41669	0.0278487	0.193227	-3.46259		Tbc1d10c	-0.389033	9.42618	-2.50316	0.0234085	0.162534	-4.49676		Dclre1b	-2.12319	3.76259	-2.58969	0.0196431	0.13639	-3.18121
Unc50	-0.597924	6.38094	-2.41616	0.0278784	0.193227	-3.91357		Ube2s	-0.767166	6.15875	-2.50262	0.0234343	0.16261	-3.66157		Evl	-0.436935	7.30612	-2.58898	0.0196718	0.136502	-3.61018
Exoc5	-1.06355	5.9446	-2.416	0.0278876	0.193227	-3.74546		Fam169b	-0.938046	4.44783	-2.50226	0.0234513	0.162625	-3.33858		Wdr70	1.5894	4.22252	2.58814	0.0197053	0.136631	-3.09054
A830080D01Rik	1.25459	4.45334	2.41567	0.0279055	0.193227	-3.39983		5330426P16Rik	-1.33814	3.75319	-2.5004	0.0235395	0.163132	-3.22154		Mapk7	2.28927	3.48811	2.58789	0.0197154	0.136631	-3.19534
Eif4a1	-0.331625	9.18152	-2.41561	0.0279093	0.193227	-4.62381		Appl1	-0.657796	6.4352	-2.4994	0.0235867	0.163282	-3.70283		Mtor	-1.33527	4.93227	-2.58601	0.0197908	0.137022	-3.10183
Gm17455	4.62221	-1.326	2.41546	0.0279174	0.193227	-3.76761		Mapk8ip3	1.34267	4.54187	2.49931	0.0235909	0.163282	-3.24153		Naf1	-3.31431	0.957169	-2.58586	0.019797	0.137022	-3.73506
Zfp652	-4.51474	-0.16779	-2.41347	0.0280288	0.1938	-3.74449		Arl1	-0.827257	5.88309	-2.49856	0.0236269	0.163371	-3.56689		Ctsl	-1.88703	2.42888	-2.58476	0.0198412	0.137239	-3.17503
5430427O19Rik	-1.92449	3.84026	-2.41306	0.0280518	0.1938	-3.35583		9130206I24Rik	-3.11211	1.0919	-2.49841	0.0236338	0.163371	-3.39617		Cdk2	0.688087	6.43422	2.58446	0.0198534	0.137239	-3.44682
Ctso	-0.648025	6.37168	-2.41303	0.0280535	0.1938	-3.96442		Wdr43	-0.547453	6.77798	-2.49639	0.0237305	0.163936	-3.77767		Hsp90aa1	0.325932	8.46439	2.58321	0.0199039	0.137501	-3.91719
Cbx3	0.292742	8.85548	2.41245	0.0280859	0.193901	-4.55579		Nars	-0.5225	7.21132	-2.49606	0.0237462	0.163941	-3.91018		Fam86	-1.01823	5.02129	-2.58269	0.019925	0.137559	-3.1722
Hist1h2ab	3.12003	1.38693	2.41208	0.0281065	0.19392	-3.61107		Paics	-0.535891	7.57729	-2.49548	0.023774	0.164029	-4.06446		Chek1	3.53347	2.23369	2.58057	0.0200111	0.13805	-3.35422
Ramp1	-0.585427	6.70937	-2.4094	0.0282577	0.194826	-4.18859		Ubash3b	0.594356	6.20566	2.49415	0.023838	0.164366	-3.75235		Lnpep	0.641439	6.5268	2.58032	0.0200214	0.13805	-3.51876
Naa35	1.10592	5.458	2.40912	0.0282734	0.194826	-3.67684		1810006J02Rik	-2.74448	2.6747	-2.49315	0.0238858	0.164567	-3.34177		Rell2	-3.55045	-0.921539	-2.57941	0.0200582	0.138145	-3.81576
St14	2.94778	1.48068	2.40816	0.0283276	0.194955	-3.4641		Rps11	-0.254984	10.4278	-2.49292	0.0238972	0.164567	-4.77514		Rplp1	-0.316899	10.2676	-2.57923	0.0200657	0.138145	-4.40897
Ift27	0.856796	5.36548	2.40793	0.0283405	0.194955	-3.67483		Cela1	1.66195	3.95811	2.49182	0.0239499	0.164698	-3.24738		Mepce	-1.767	3.85098	-2.57905	0.0200731	0.138145	-3.12536
Arid5b	1.08059	4.71168	2.40762	0.0283583	0.194955	-3.4606		Pfkfb4	4.35888	1.82052	2.49173	0.0239545	0.164698	-3.48447		Zc3h10	1.16479	4.81042	2.57854	0.0200938	0.138201	-3.12635
Dus2l	0.606461	5.6888	2.40753	0.0283636	0.194955	-3.79976		Rad50	-0.779838	5.68662	-2.49158	0.0239615	0.164698	-3.48358		Hectd2	3.71809	0.66433	2.57787	0.0201212	0.138248	-3.78351
Cops8	-0.540343	6.5736	-2.40571	0.0284665	0.195539	-3.97394		Clic1	-0.251858	9.13701	-2.49054	0.0240122	0.164942	-4.46519		Atad2	0.875649	6.13605	2.57775	0.0201261	0.138248	-3.39503
Galnt9	3.7195	-0.298964	2.4053	0.0284896	0.195547	-3.62591		Plcxd2	-0.842945	5.54011	-2.49002	0.0240372	0.16501	-3.43687		Nfil3	4.21546	2.05889	2.57649	0.0201778	0.138349	-3.4738
Rab22a	-1.03719	4.96916	-2.40476	0.0285209	0.195547	-3.53258		Naf1	3.26458	0.957169	2.48931	0.0240716	0.165142	-3.64734		2810408I11Rik	3.86768	0.441638	2.57628	0.0201863	0.138349	-3.72881
Tnfrsf14	2.03054	2.84144	2.40475	0.0285214	0.195547	-3.38654		Arl4a	0.684372	5.79852	2.48782	0.024144	0.165535	-3.62229		Laptm5	0.240549	10.959	2.57615	0.0201916	0.138349	-4.63167
Ttf1	-0.804425	5.80383	-2.40429	0.0285471	0.195556	-3.77175		Lime1	-0.381023	7.88355	-2.48715	0.0241767	0.165655	-4.14518		Pim1	1.94882	2.54893	2.57604	0.0201961	0.138349	-3.34376
Fam55c	1.43243	4.55913	2.40409	0.0285586	0.195556	-3.47758		Nudt16	0.78472	5.43874	2.48595	0.0242349	0.165855	-3.43068		Celf2	-0.43871	7.98403	-2.57585	0.0202042	0.138349	-3.81882
Gm4759	-0.712337	6.92004	-2.40258	0.0286451	0.196026	-4.03527		Eef2	-0.284803	9.41585	-2.48576	0.0242443	0.165855	-4.53045		Cutc	-1.40591	3.93328	-2.57516	0.0202325	0.138408	-3.11061
Ccdc47	-0.446547	6.82757	-2.40212	0.0286712	0.196081	-4.11108		Gm4759	-0.730417	6.92004	-2.48561	0.0242515	0.165855	-3.83422		Zfp566	-3.28704	2.43762	-2.57496	0.0202405	0.138408	-3.51641
Cdk5rap3	-0.656004	7.01353	-2.40176	0.0286921	0.196102	-4.13948		Rpgrip1l	-4.07548	-0.235996	-2.48425	0.0243184	0.166157	-3.62314		Maged2	-3.73957	2.53963	-2.57471	0.0202507	0.138408	-3.57239
Daam1	3.035	1.76087	2.40121	0.0287232	0.196112	-3.53772		Snord35b	-2.0684	2.01445	-2.48409	0.024326	0.166157	-3.38928		Sbds	-0.546848	6.71016	-2.57262	0.0203372	0.138911	-3.52034
Ube2c	1.72254	5.54662	2.4009	0.0287413	0.196112	-3.46016		Pdcd10	-0.452422	7.29152	-2.48338	0.0243606	0.166289	-3.97553		2700089E24Rik	-0.734194	5.75399	-2.57213	0.0203573	0.138962	-3.29312
Pi4kb	-0.6826	5.91333	-2.40079	0.0287476	0.196112	-3.77842		St14	3.19918	1.48068	2.48305	0.0243771	0.166297	-3.45236		Trim44	-3.53262	3.47531	-2.57157	0.0203805	0.139022	-3.29757
Thap4	1.48922	4.294	2.39855	0.0288763	0.196726	-3.4164		Grasp	-4.80053	0.843847	-2.48264	0.0243973	0.166331	-3.64152		A630007B06Rik	1.55454	3.95839	2.5713	0.0203916	0.139022	-3.15454
Tsga14	1.78686	3.85833	2.39854	0.0288769	0.196726	-3.40889		Yrdc	-1.45315	5.26789	-2.48148	0.0244543	0.166616	-3.40359		Dcaf11	-0.492384	7.11842	-2.56996	0.0204474	0.139243	-3.61456
Naprt1	3.03642	2.67773	2.39829	0.0288915	0.196726	-3.43796		Dhrs3	1.21525	4.45945	2.48113	0.0244715	0.166629	-3.39877		Arhgap25	0.667245	6.83154	2.56991	0.0204496	0.139243	-3.52233
Rab27a	0.721909	5.88414	2.39764	0.028929	0.196847	-3.83286		Pam	-2.44719	2.25358	-2.47924	0.0245645	0.167158	-3.41118		Tram1	-0.264813	9.31806	-2.56577	0.020622	0.14033	-4.21689
Rmnd5b	-0.457192	6.86144	-2.39723	0.0289526	0.196847	-4.07706		Themis	0.543329	7.35019	2.47837	0.0246076	0.167347	-3.95857		Hat1	0.589618	6.59167	2.56394	0.0206987	0.14067	-3.49751
Dcxr	1.56551	3.72688	2.39701	0.0289652	0.196847	-3.37669		Fbxo45	-3.08668	1.9097	-2.47724	0.024664	0.167626	-3.46961		Mical1	0.712482	6.55437	2.56389	0.0207009	0.14067	-3.54997
Nubpl	3.17629	2.25505	2.39673	0.0289816	0.196847	-3.4813		Cldn10	4.24297	0.923328	2.47658	0.0246966	0.1677	-3.58001		Tatdn3	-2.90227	1.58928	-2.56357	0.0207143	0.14067	-3.5557
Rfng	-1.37658	4.68071	-2.3959	0.0290292	0.197048	-3.44173		Ip6k1	0.675523	6.74148	2.4764	0.0247056	0.1677	-3.85704		Sppl3	0.850295	5.05812	2.56311	0.0207335	0.14067	-3.21318
Rundc3b	-1.72508	3.35944	-2.39523	0.029068	0.197189	-3.47812		Ppp6r2	1.87149	3.77468	2.47327	0.0248616	0.168654	-3.27571		Sept4	3.73791	0.263968	2.56305	0.0207364	0.14067	-3.57009
Tubg2	2.95194	0.380318	2.39409	0.0291343	0.197516	-3.44291		Atxn10	0.50108	7.50532	2.46966	0.025043	0.169668	-4.03963		Zhx1	-0.554267	6.98573	-2.56248	0.0207604	0.140713	-3.63003
Tpm4	-0.353106	8.67034	-2.39248	0.0292277	0.198026	-4.49087		Gaa	1.18662	5.75511	2.46965	0.0250432	0.169668	-3.51835		Cdk2ap1	1.50237	3.95904	2.56228	0.0207685	0.140713	-3.13475
Foxn2	0.51586	6.58703	2.38877	0.0294449	0.199312	-4.00933		Ap3m2	-1.62806	3.86617	-2.46936	0.0250577	0.169668	-3.26851		Stim2	1.00715	6.09215	2.56	0.0208648	0.141278	-3.33718
Crb3	4.36745	-1.9239	2.38862	0.0294539	0.199312	-3.79758		Rc3h1	-0.98892	5.38352	-2.46825	0.025114	0.169944	-3.52757		Arhgef1	0.290628	9.49833	2.55957	0.0208832	0.141314	-4.24068
Akap12	1.80927	4.28897	2.38822	0.0294773	0.199347	-3.4315		Hacl1	2.26908	3.06756	2.4673	0.0251621	0.170043	-3.32281		Rad51c	4.47177	0.872919	2.55877	0.0209171	0.141456	-3.73562
Ercc5	3.08318	2.78293	2.38723	0.0295355	0.199616	-3.4048		Acyp2	-3.236	0.818226	-2.46712	0.0251712	0.170043	-3.59493		Bsdc1	-1.49814	5.03218	-2.55834	0.0209355	0.141493	-3.17147
Eef1d	-0.433988	7.66441	-2.38591	0.0296133	0.200018	-4.29907		Ect2	-1.60275	4.50188	-2.46703	0.0251755	0.170043	-3.36035		Rbfa	-0.72682	5.75929	-2.55787	0.0209555	0.14154	-3.35622
1700012D01Rik	3.7879	-1.22053	2.38495	0.0296696	0.200274	-3.77634		Maml2	-0.547941	6.02776	-2.46663	0.025196	0.170077	-3.73414		Rpl10	-0.280959	10.2729	-2.55641	0.0210177	0.141783	-4.48647
Flot1	-0.906976	5.1969	-2.38367	0.0297453	0.200661	-3.62283		Itgb8	3.46944	-0.906884	2.46603	0.025226	0.170101	-3.63873		Cnpy2	-0.753939	5.72505	-2.55614	0.0210291	0.141783	-3.32259
2700023E23Rik	-2.15536	2.31885	-2.38302	0.0297839	0.200798	-3.4812		Ssh3	3.05041	2.27644	2.46594	0.0252307	0.170101	-3.35877		Poldip3	0.605027	6.89028	2.55611	0.0210303	0.141783	-3.5935
Nr4a2	4.63073	-1.33625	2.38241	0.0298205	0.20092	-3.78901		Ppp1r16b	0.425315	8.5702	2.46411	0.0253235	0.170171	-4.31727		Wasf2	0.684546	6.32869	2.55319	0.0211553	0.142537	-3.51314
Fastkd3	1.43513	3.88312	2.38139	0.0298811	0.201204	-3.43126		Tfip11	-0.830066	5.43768	-2.46386	0.0253364	0.170171	-3.504		Pde4d	-1.26865	4.22817	-2.55265	0.0211784	0.142605	-3.14127
Xpot	1.1513	5.36973	2.38085	0.0299131	0.201295	-3.70295		Atp8a1	0.747256	5.67739	2.46382	0.0253384	0.170171	-3.49018		Abcg1	-0.412516	7.83323	-2.55151	0.0212274	0.142847	-3.84429
Ramp3	-2.97144	1.76666	-2.38026	0.0299482	0.201407	-3.46333		Sepp1	-0.604866	7.37196	-2.46382	0.0253386	0.170171	-4.05202		Arpc3	-0.499627	7.30483	-2.54864	0.0213513	0.143592	-3.69675
Arhgef4	1.15914	4.50778	2.37971	0.0299811	0.201472	-3.53197		Tmem216	2.2404	2.85967	2.46374	0.0253425	0.170171	-3.32297		Prkd2	0.650678	6.95282	2.54699	0.0214227	0.143983	-3.65457
Dcaf13	0.595978	6.58574	2.37948	0.0299946	0.201472	-4.0388		Casp4	0.996704	2.72151	2.46334	0.0253627	0.170171	-3.45679		Fam174b	-3.47013	3.81771	-2.54603	0.0214644	0.144175	-3.29222
Exoc8	-2.73435	3.59023	-2.37792	0.0300882	0.201862	-3.4282		1190002F15Rik	-0.945192	3.75309	-2.46331	0.0253643	0.170171	-3.37156		Spag5	3.62835	2.18967	2.54245	0.0216209	0.145137	-3.3288
Ppm1k	-1.0431	5.30051	-2.37789	0.0300897	0.201862	-3.71119		Dr1	0.620958	6.62221	2.46327	0.0253665	0.170171	-3.84935		Camk4	-0.539749	7.05594	-2.54131	0.0216708	0.145305	-3.63905
Jag1	-4.86874	-1.14003	-2.3768	0.0301551	0.202176	-3.76943		Aoah	-5.74189	-1.29062	-2.46298	0.0253814	0.170171	-3.71873		Gtse1	2.54265	2.95706	2.54127	0.0216726	0.145305	-3.23648
Vdac2	-0.365489	7.60668	-2.3763	0.0301849	0.202252	-4.28195		2700029M09Rik	-0.677239	5.89417	-2.46117	0.0254741	0.170687	-3.69501		Cd2	0.42017	8.72465	2.54059	0.0217026	0.145417	-4.14666
Serpina3g	0.657476	7.38349	2.3756	0.0302272	0.202411	-4.28005		Pou2af1	4.70174	-1.77641	2.46082	0.0254917	0.1707	-3.78347		Hip1	3.44032	3.00718	2.53945	0.0217527	0.145663	-3.37445
Slc1a5	0.334116	8.6489	2.37446	0.0302957	0.202746	-4.61429		Elovl6	-2.66721	3.49381	-2.46051	0.0255074	0.170701	-3.3369		Slc25a38	1.82023	3.68532	2.53798	0.0218174	0.146007	-3.22281
Gng5	0.377189	8.26726	2.37269	0.030403	0.203294	-4.50654		1500004A13Rik	2.92536	0.622316	2.45719	0.0256781	0.171738	-3.48402		Snx5	0.389779	7.85284	2.5373	0.0218473	0.146048	-3.91845
Smek2	-0.714326	7.42936	-2.37232	0.0304251	0.203294	-4.29553		Ninj1	1.50897	3.93801	2.45592	0.0257438	0.17184	-3.30183		Slc6a13	-3.88938	-0.00314177	-2.53724	0.0218504	0.146048	-3.73993
Asf1b	1.71309	5.75335	2.37218	0.0304336	0.203294	-3.54566		Wls	0.915856	5.93045	2.45579	0.0257506	0.17184	-3.66008		Sf3b5	0.447764	6.70658	2.53685	0.0218675	0.146073	-3.58311
Rps6ka1	-0.374903	8.2202	-2.37134	0.0304847	0.203394	-4.49271		Commd7	0.514509	6.85215	2.45568	0.0257562	0.17184	-3.88684		Rbm15	0.54899	6.18401	2.53625	0.0218942	0.146162	-3.48537
Atp10a	2.79114	3.436	2.37112	0.0304978	0.203394	-3.4291		Mtmr12	0.543321	6.62126	2.45561	0.02576	0.17184	-3.88031		Asap1	-0.645626	7.0778	-2.53589	0.0219098	0.146177	-3.57394
Rfx1	1.12921	4.7872	2.37101	0.0305045	0.203394	-3.53633		Cep76	1.95049	3.32918	2.45537	0.0257721	0.17184	-3.31367		Ube2s	0.750894	6.15875	2.53531	0.0219359	0.146261	-3.4817
Dtnbp1	-1.28361	5.02958	-2.37029	0.0305478	0.203559	-3.56148		Tmco3	1.23184	4.74861	2.45414	0.0258358	0.172133	-3.35984		Kif3a	-2.61781	2.93548	-2.53473	0.0219616	0.146344	-3.35335
Klhl17	-1.34604	4.46615	-2.36843	0.0306612	0.203862	-3.51773		Chd1	0.896991	6.01549	2.45385	0.025851	0.172133	-3.68713		Lamp2	-0.721473	6.51869	-2.53407	0.0219909	0.146449	-3.51227
Lemd3	-2.9603	2.18707	-2.36834	0.0306667	0.203862	-3.52227		Impg1	4.34702	-1.01252	2.45361	0.0258633	0.172133	-3.77642		Msh3	-1.17239	4.51168	-2.53341	0.0220201	0.146555	-3.18991
Zfp934	2.16773	2.1321	2.36833	0.0306672	0.203862	-3.5143		Dnajc18	1.38482	4.21912	2.45105	0.025997	0.172917	-3.32197		Ifi27l2a	-0.521018	8.85444	-2.53272	0.0220509	0.146595	-4.02936
Wscd2	4.72675	-0.0282838	2.36805	0.0306845	0.203862	-3.7939		Aspm	-2.89083	1.87854	-2.44869	0.0261203	0.173632	-3.3338		Apobec3	-0.269463	9.06752	-2.53268	0.0220531	0.146595	-4.17334
Map3k3	-1.54345	4.33248	-2.36801	0.0306867	0.203862	-3.43276		Nmb	0.926643	4.57521	2.44802	0.0261551	0.173757	-3.38356		D6Wsu163e	3.36174	3.2827	2.53161	0.0221006	0.146822	-3.40328
Fam168a	1.75227	4.00838	2.36711	0.0307418	0.204104	-3.42256		Mrpl9	0.548811	6.57821	2.44736	0.0261898	0.173882	-3.83621		1110018J18Rik	2.49461	3.2038	2.53102	0.0221272	0.146823	-3.35861
Eed	-0.663341	6.58288	-2.36621	0.030797	0.204346	-4.0658		Pnpo	0.973053	5.40966	2.44585	0.0262696	0.174305	-3.5059		Bhlhb9	-1.29294	4.96926	-2.53101	0.0221277	0.146823	-3.20022
Mll3	-0.561499	6.61429	-2.36575	0.0308248	0.204367	-4.04942		Cit	-3.17147	1.15608	-2.44501	0.0263135	0.174491	-3.42122		Cln3	-0.610275	6.36958	-2.53007	0.0221698	0.146926	-3.53162
Pglyrp2	-0.421074	7.43205	-2.36554	0.0308376	0.204367	-4.34893		Fam105b	-2.98445	3.23239	-2.44355	0.0263906	0.174793	-3.38873		Tnfsf11	-2.27578	4.63174	-2.52985	0.0221795	0.146926	-3.27114
Plk3	1.3112	5.21954	2.36406	0.0309288	0.204631	-3.69381		Lyz2	-5.45367	1.28981	-2.44354	0.0263912	0.174793	-3.50835		Pvr	-1.71792	3.82607	-2.52976	0.0221836	0.146926	-3.19131
Sdad1	1.10399	4.3519	2.36347	0.0309651	0.204631	-3.5353		Uap1	-0.856117	5.00918	-2.44238	0.0264527	0.175094	-3.48409		Nnt	-0.94888	5.12456	-2.525	0.0223981	0.148257	-3.26017
Dld	0.791182	6.39312	2.36344	0.0309668	0.204631	-3.95489		Rab3gap2	1.02024	5.19469	2.44177	0.026485	0.175203	-3.52002		Taf1	1.40192	5.09334	2.52311	0.022484	0.148584	-3.24481
Thra	-2.0374	1.87427	-2.3634	0.0309694	0.204631	-3.48788		Cstf2	-0.754008	6.37461	-2.43992	0.0265838	0.175749	-3.77893		Harbi1	-4.15257	2.41396	-2.52307	0.0224859	0.148584	-3.59894
Tmem63b	3.22433	1.38729	2.36318	0.0309829	0.204631	-3.63064		Arsa	2.98104	3.70689	2.43921	0.0266213	0.175891	-3.33843		Hpcal1	-0.50823	7.2939	-2.52301	0.0224883	0.148584	-3.68691
Fli1	-0.451617	7.75794	-2.36307	0.0309899	0.204631	-4.35481		Atxn1	-1.0575	4.54203	-2.43753	0.0267114	0.176379	-3.37161		Set	0.270639	8.88861	2.52231	0.0225205	0.148706	-4.15524
Ttc3	0.69881	6.34063	2.36231	0.0310364	0.204685	-4.05829		Cep290	3.75828	-0.555271	2.43714	0.0267319	0.176408	-3.69394		Sv2c	-3.00139	1.07303	-2.52153	0.022556	0.14885	-3.72788
BC057079	-3.06687	2.93089	-2.36225	0.03104	0.204685	-3.4733		Gm16576	4.02787	-0.822223	2.43607	0.0267892	0.176679	-3.79034		Klhl15	3.12722	2.06542	2.52016	0.0226186	0.149174	-3.62647
Xdh	0.872265	6.55469	2.36188	0.0310629	0.204685	-3.90653		Ilk	-0.485008	7.6667	-2.43576	0.0268061	0.176679	-4.18823		Braf	-1.38004	4.47158	-2.51943	0.0226521	0.149304	-3.20421
Bspry	-3.63236	2.77309	-2.36153	0.0310846	0.204685	-3.49468		Uap1l1	0.83093	5.84806	2.43547	0.0268216	0.176679	-3.74884		Caprin1	0.32731	8.51056	2.51881	0.0226801	0.149399	-4.07709
Kti12	-0.650853	5.94938	-2.36116	0.0311071	0.204685	-3.87824		Vipr1	-4.19986	2.00597	-2.43335	0.026936	0.177271	-3.54764		Fkbp2	0.81627	5.15112	2.51624	0.0227982	0.150086	-3.31996
Tfe3	1.23886	4.67848	2.36111	0.0311107	0.204685	-3.58001		Ppan	-0.852806	5.55369	-2.4332	0.0269438	0.177271	-3.58924		Bloc1s1	-0.488482	6.44517	-2.51576	0.0228206	0.150087	-3.56654
Pgm3	-0.965543	4.30902	-2.36046	0.0311509	0.204826	-3.5386		Nrbp1	0.532482	7.71969	2.43217	0.0269995	0.17753	-4.17985		Tmem42	-1.46302	4.38259	-2.51564	0.0228259	0.150087	-3.21213
Sntb1	2.03158	2.89575	2.35967	0.0311995	0.205022	-3.46412		Mcm7	-0.402114	7.01196	-2.43167	0.0270266	0.177601	-4.10007		Psmd14	0.398075	7.69309	2.51476	0.0228668	0.150266	-3.89363
Chmp6	0.685903	5.66144	2.35892	0.031246	0.205204	-3.78172		Rora	-1.24464	5.90624	-2.43123	0.0270505	0.177651	-3.45289		Rps4x	-0.295873	10.1199	-2.51431	0.0228876	0.150312	-4.51271
A630007B06Rik	1.47012	3.95839	2.35766	0.0313241	0.205486	-3.43611		Ccdc88c	-0.817133	5.40309	-2.43022	0.0271053	0.177904	-3.58085		Prr11	1.30799	3.48937	2.50984	0.0230948	0.151556	-3.23039
Prpf18	0.831282	6.38406	2.35763	0.0313265	0.205486	-4.0471		Gm15708	-2.56456	3.19015	-2.42872	0.0271868	0.178235	-3.41853		Map2k7	-1.03256	5.04225	-2.50946	0.0231129	0.151556	-3.26555
Dnajc25	-2.84601	2.05565	-2.35381	0.0315649	0.206811	-3.54669		Ino80e	-1.02503	4.5828	-2.42831	0.0272088	0.178235	-3.39469		Pold2	0.618425	6.16338	2.50933	0.0231187	0.151556	-3.51746
3230401D17Rik	-0.474503	6.72648	-2.35378	0.0315664	0.206811	-4.08889		H2-Q8	-0.480924	7.27838	-2.42804	0.0272238	0.178235	-4.08687		Zfr2	-5.28282	-0.856287	-2.50844	0.0231603	0.151689	-3.88651
Tfrc	1.65154	4.01298	2.35251	0.0316464	0.207211	-3.44374		Pigp	0.890816	5.58355	2.42787	0.0272332	0.178235	-3.58966		Akap8l	-0.678668	6.62079	-2.5083	0.0231669	0.151689	-3.61294
Mtmr1	-1.04049	6.11272	-2.35208	0.0316728	0.20726	-3.88806		2610039C10Rik	-1.09743	5.5846	-2.42779	0.0272375	0.178235	-3.60122		Isg15	-2.36812	2.78937	-2.50766	0.0231968	0.151701	-3.47492
Nenf	2.32697	2.7545	2.35153	0.0317079	0.207329	-3.46747		Heatr2	-2.98466	3.931	-2.42749	0.0272537	0.178235	-3.35912		C630004H02Rik	2.97163	2.71732	2.50766	0.023197	0.151701	-3.27707
H13	-0.349165	7.85679	-2.35131	0.0317215	0.207329	-4.43267		Chst10	0.753527	5.81655	2.42716	0.027272	0.178248	-3.64884		Megf9	4.4666	-0.973802	2.50737	0.0232103	0.151701	-3.89786
Chaf1a	2.60324	3.33288	2.35005	0.0318009	0.207724	-3.49578		Hist1h1d	-2.82428	1.37931	-2.4268	0.0272915	0.178269	-3.60344		Nxn	3.45917	1.54724	2.50673	0.0232407	0.151809	-3.59614
Mesdc2	-0.65127	6.3057	-2.34952	0.0318346	0.20782	-4.05023		Tbc1d22b	-0.62019	6.15965	-2.42574	0.0273495	0.17854	-3.75579		Dnalc4	-3.03989	2.70138	-2.50606	0.0232718	0.151921	-3.56038
H2afv	0.515452	7.59054	2.34651	0.0320247	0.208746	-4.32109		E030011O05Rik	-4.01584	-0.234535	-2.42532	0.0273725	0.178567	-3.82371		Kdm3b	-0.996914	5.11095	-2.50259	0.0234355	0.152669	-3.25702
Marveld2	3.9173	0.927455	2.34643	0.0320299	0.208746	-3.57955		Slc52a3	-3.08223	1.00055	-2.42507	0.0273862	0.178567	-3.46745		Snap29	1.75449	3.67243	2.50246	0.0234419	0.152669	-3.26197
Cct5	-0.300737	8.60351	-2.34637	0.0320338	0.208746	-4.61264		Cdk2ap1	-1.34443	3.95904	-2.42404	0.0274427	0.17873	-3.3606		Itm2c	-0.756812	7.27228	-2.50234	0.0234475	0.152669	-3.73127
Snx16	4.69585	0.728662	2.34573	0.0320744	0.208886	-3.69281		Gsta4	5.52914	-1.48948	2.42399	0.0274454	0.17873	-3.7616		Rhoa	0.31436	8.99057	2.50223	0.0234526	0.152669	-4.24683
Hmgn2	0.267339	9.85363	2.3451	0.0321148	0.209024	-4.89861		Gtf3c1	0.952936	5.16939	2.42372	0.0274603	0.17873	-3.56001		I830012O16Rik	-3.13028	2.05112	-2.50193	0.023467	0.152669	-3.52124
Akr1e1	1.34997	3.61971	2.34337	0.0322248	0.209513	-3.47205		St6gal1	0.878934	5.72512	2.42336	0.0274802	0.178752	-3.70134		Xlr4c	-0.646162	5.43005	-2.50185	0.0234704	0.152669	-3.36247
Cyfip2	-0.555531	7.52872	-2.34332	0.0322283	0.209513	-4.30744		Dapp1	0.761714	6.3896	2.42248	0.0275285	0.17896	-3.87495		Fbxo22	-0.862852	5.88661	-2.50125	0.0234991	0.152697	-3.4555
6330409N04Rik	-3.22238	2.96546	-2.34131	0.0323564	0.21022	-3.50341		Hiatl1	-0.653817	6.59158	-2.42201	0.0275542	0.17902	-3.95357		Arl1	0.73952	5.88309	2.50098	0.0235117	0.152697	-3.50526
Tcf19	1.72521	4.91258	2.34077	0.0323913	0.210322	-3.48591		Lgals9	-0.370181	8.72378	-2.421	0.0276098	0.179242	-4.46061		C1galt1	-3.14393	0.233315	-2.50088	0.0235166	0.152697	-3.66744
Cdkn3	3.33153	2.4846	2.33938	0.0324808	0.210777	-3.65747		Slfn5	0.704486	5.52976	2.42061	0.0276313	0.179242	-3.64608		Ranbp1	0.445675	7.41337	2.49813	0.0236471	0.153431	-3.83102
Akap9	0.560716	6.16102	2.33601	0.032698	0.212061	-4.02329		Tctex1d2	3.71593	-1.41275	2.42009	0.0276602	0.179242	-3.79877		Lig4	-4.27233	1.26885	-2.49777	0.0236643	0.153431	-3.70571
Stk39	1.01825	5.1701	2.33531	0.0327437	0.212076	-3.74321		Gpx1	0.395256	8.02278	2.41974	0.0276798	0.179242	-4.27502		Rpl11	-0.261229	9.84631	-2.49762	0.0236717	0.153431	-4.45637
Trib2	-0.764401	5.8725	-2.33453	0.0327943	0.212076	-3.81246		Sla2	-0.787979	6.55252	-2.41961	0.0276868	0.179242	-3.89118		Snx9	4.38914	-0.313106	2.49645	0.0237275	0.153661	-3.92383
Ankrd11	-0.964781	5.43433	-2.3343	0.0328091	0.212076	-3.75289		Pop4	-0.937579	5.19755	-2.41926	0.0277059	0.179242	-3.60486		Brd3	0.625033	5.92744	2.49605	0.0237466	0.153661	-3.51218
Ssh3	2.9424	2.27644	2.33409	0.0328223	0.212076	-3.50358		Tnrc6c	0.663533	6.05864	2.41905	0.0277178	0.179242	-3.72916		Dhps	0.71712	5.45183	2.49598	0.0237499	0.153661	-3.38089
Fam179b	3.21619	3.52804	2.33402	0.0328275	0.212076	-3.47428		Mad2l1bp	-0.63634	5.86562	-2.41902	0.0277197	0.179242	-3.71653		5430417L22Rik	-0.896104	5.76673	-2.4957	0.0237636	0.153661	-3.38938
Dusp14	4.60062	-1.73718	2.33379	0.0328424	0.212076	-3.82254		Tm7sf2	3.10229	2.24234	2.418	0.027776	0.1795	-3.49207		Gemin6	2.81803	3.32965	2.4943	0.0238308	0.153758	-3.4098
Tbk1	-0.643984	6.49342	-2.33361	0.0328536	0.212076	-4.06489		Vps25	0.39012	7.52754	2.41751	0.0278032	0.179569	-4.17281		Zbtb40	-1.97748	2.7561	-2.49402	0.0238442	0.153758	-3.38703
Bms1	1.00912	5.48581	2.33358	0.0328558	0.212076	-3.78083		Cma1	-6.37547	-0.151877	-2.41643	0.0278631	0.179752	-3.67299		Apobec2	2.55022	2.03412	2.49398	0.0238458	0.153758	-3.37643
Pank4	1.32511	4.19078	2.33323	0.0328783	0.212096	-3.51737		Card11	-0.904525	6.36881	-2.4162	0.0278764	0.179752	-3.76653		Urb2	3.1747	2.92442	2.49391	0.0238494	0.153758	-3.44951
Ercc6l	4.16647	1.4276	2.32965	0.0331126	0.21339	-3.76339		Esco2	-1.27045	2.40163	-2.41589	0.0278936	0.179752	-3.42553		Ppbp	5.31094	-0.872583	2.4936	0.0238645	0.153758	-3.88348
Decr1	1.41124	4.64903	2.32956	0.033118	0.21339	-3.66653		Ostm1	-0.795348	6.29737	-2.41582	0.0278974	0.179752	-3.81251		Spg11	-2.84029	3.36481	-2.49344	0.0238719	0.153758	-3.40755
2410022L05Rik	4.54637	-0.935381	2.3292	0.0331416	0.213416	-3.80762		Pfkl	0.707696	6.70252	2.41471	0.0279591	0.17999	-3.94429		Nucb1	-0.435331	7.91086	-2.49333	0.0238772	0.153758	-3.97318
Pigg	4.25616	-0.306381	2.32747	0.0332552	0.214022	-3.78243		Phf11	-1.19688	4.51557	-2.41457	0.0279672	0.17999	-3.39157		Tef	2.67038	2.04511	2.49257	0.0239141	0.153905	-3.43661
Prelid2	2.62574	1.83999	2.32521	0.0334045	0.214504	-3.58595		Son	0.325017	8.85331	2.41425	0.0279848	0.179997	-4.50236		Setd8	2.14609	3.26648	2.49199	0.023942	0.153993	-3.37129
Dnmt3b	-1.18056	4.33909	-2.3251	0.0334114	0.214504	-3.56231		Nadk	0.537585	6.88305	2.41375	0.0280129	0.180071	-4.00566		Psmf1	-0.606738	6.19205	-2.49093	0.023993	0.154173	-3.52784
Gm2382	0.626152	5.57293	2.32504	0.0334158	0.214504	-3.9108		B3gnt5	-2.9201	2.33436	-2.41319	0.0280442	0.180166	-3.38653		Slc52a2	-0.994829	5.51093	-2.49083	0.0239981	0.154173	-3.37755
Slc35e1	-0.900451	4.86946	-2.32497	0.0334201	0.214504	-3.69782		Gimap3	0.207394	10.8206	2.41159	0.0281343	0.180639	-5.02326		Ddah2	4.273	-0.331127	2.49025	0.0240259	0.15426	-3.93025
Hdac10	1.70984	4.74221	2.32458	0.0334457	0.214504	-3.61366		Recql	-0.74108	6.06291	-2.41061	0.0281896	0.180887	-3.75849		Tubg2	-5.02026	0.380318	-2.48942	0.0240662	0.154429	-3.91501
Atxn1l	-2.197	2.30964	-2.32455	0.0334481	0.214504	-3.48674		D930048N14Rik	-4.92843	-1.24314	-2.41019	0.0282128	0.18093	-3.79827		Zfp142	-2.44566	3.23762	-2.48789	0.0241404	0.154813	-3.44205
Dhx34	1.8223	3.89303	2.32392	0.0334896	0.214644	-3.49746		Isoc2a	3.61635	-0.588267	2.4098	0.028235	0.180966	-3.80808		Rpl35	-0.25513	9.99745	-2.48748	0.0241607	0.154844	-4.52831
Atxn7l2	2.40001	2.82774	2.32295	0.0335536	0.214928	-3.53505		Cd69	-1.06513	6.0583	-2.40793	0.0283409	0.181538	-3.77215		Sbk1	1.22004	3.98867	2.48701	0.0241835	0.154844	-3.24264
Maz	0.658125	6.00236	2.32198	0.0336186	0.215218	-3.97288		Tpm3	-0.22342	9.67021	-2.4074	0.0283709	0.181624	-4.75842		Hrh2	2.2337	2.91604	2.48683	0.0241922	0.154844	-3.42919
4632415K11Rik	2.9389	2.0867	2.32022	0.0337352	0.215535	-3.50178		1700020I14Rik	-0.791213	5.87013	-2.4069	0.028399	0.181652	-3.76733		Rhbdd2	-1.35411	5.05888	-2.48663	0.0242019	0.154844	-3.26562
Plagl2	0.721459	6.49659	2.32022	0.0337354	0.215535	-4.13074		Ppp1r12a	-0.559396	7.3874	-2.40673	0.0284085	0.181652	-4.06117		Bfar	-0.634359	6.41032	-2.48552	0.0242563	0.155101	-3.65436
Gng3	3.41997	-0.343396	2.32005	0.0337466	0.215535	-3.80153		Rbbp8	-1.25381	4.87675	-2.40633	0.0284312	0.18169	-3.58158		Gm9897	-2.81484	1.48361	-2.48251	0.0244034	0.15595	-3.60201
Tmem68	-1.49636	5.02348	-2.31994	0.0337538	0.215535	-3.63364		Mrpl18	-0.416339	7.23556	-2.40548	0.0284795	0.181892	-4.12321		Rnf25	-3.25927	2.81771	-2.48166	0.0244453	0.156127	-3.47262
Plxnd1	4.37775	-1.50151	2.31951	0.0337828	0.215535	-3.84585		2610035D17Rik	1.25492	5.10605	2.40497	0.0285087	0.181972	-3.47782		Casd1	-1.18878	4.80925	-2.48104	0.0244759	0.156231	-3.26568
Acpl2	-2.96963	4.2212	-2.31945	0.0337865	0.215535	-3.49036		Mzt2	2.96211	2.36521	2.40424	0.0285505	0.182133	-3.52334		Commd7	-0.501206	6.85215	-2.48042	0.0245064	0.156321	-3.71121
Usp37	0.762462	6.12301	2.31741	0.0339233	0.216281	-3.96029		Slc26a11	2.50821	4.04219	2.40267	0.0286396	0.182594	-3.36818		Nmral1	2.76813	2.64098	2.47982	0.0245359	0.156321	-3.56168
Spc24	1.64095	4.43069	2.31703	0.0339487	0.216317	-3.49326		Renbp	3.58153	-0.644888	2.40055	0.0287613	0.183263	-3.64782		Serpinb6a	-0.936407	5.065	-2.47972	0.0245411	0.156321	-3.31794
Kif13b	1.61313	3.86027	2.31639	0.0339913	0.216447	-3.52003		Prpf8	-0.52999	7.43368	-2.39942	0.0288262	0.183569	-4.15086		Slc9a1	1.02684	4.69238	2.47959	0.0245474	0.156321	-3.28772
Mtss1	3.67292	-0.835947	2.31613	0.0340089	0.216447	-3.82665		Trim30a	0.674838	6.83896	2.39815	0.0288994	0.183928	-3.9844		Hnrnpa0	-0.685868	5.85601	-2.47902	0.0245755	0.156409	-3.50531
Bivm	3.65852	1.39633	2.31559	0.0340451	0.216468	-3.56242		Nrm	-1.36763	4.95629	-2.39762	0.0289299	0.183937	-3.62783		Gm16039	1.26985	4.65504	2.47734	0.024659	0.156684	-3.28659
Cbll1	-0.877555	5.63349	-2.3155	0.0340517	0.216468	-3.87902		Wrap53	1.46787	4.45472	2.39754	0.0289344	0.183937	-3.4326		1700096K18Rik	-2.09752	2.81149	-2.47722	0.0246648	0.156684	-3.39395
Cds2	-0.739728	6.4487	-2.3138	0.0341657	0.217065	-4.0996		Slc25a30	-3.34206	1.68029	-2.39502	0.0290803	0.184673	-3.61381		Gnl2	-0.596201	6.28772	-2.4772	0.0246657	0.156684	-3.58039
Mrpl10	0.62752	6.72671	2.31257	0.0342487	0.217467	-4.20324		Celf2	0.418955	7.98403	2.39474	0.0290963	0.184673	-4.3102		Fam78a	0.728438	6.18226	2.47699	0.0246761	0.156684	-3.60143
Ccdc76	-1.49442	3.55437	-2.31195	0.0342908	0.217607	-3.50165		2610301B20Rik	4.08324	1.87919	2.39466	0.029101	0.184673	-3.49186		9330151L19Rik	2.49477	2.92549	2.47667	0.024692	0.156685	-3.45867
Cd28	0.426072	8.41839	2.31047	0.0343912	0.217996	-4.71305		Ypel2	4.22049	1.37462	2.39331	0.0291799	0.185047	-3.67462		4933406I18Rik	-2.77921	1.26802	-2.47624	0.0247135	0.156685	-3.74314
Ankrd44	-0.414175	7.80996	-2.31046	0.0343921	0.217996	-4.45706		Pafah1b1	-0.528203	6.91564	-2.39279	0.0292099	0.185047	-4.0541		Gbas	-0.658669	6.07112	-2.47612	0.0247194	0.156685	-3.54221
Aph1a	-0.896577	5.66861	-2.30912	0.0344831	0.218447	-3.85899		Stat2	1.34824	5.31439	2.39277	0.0292108	0.185047	-3.56345		Clint1	-0.495696	6.5343	-2.47457	0.0247967	0.157084	-3.68349
Bcr	-2.29296	2.01146	-2.30872	0.0345101	0.21849	-3.51889		Srsf7	-0.302124	8.99737	-2.39096	0.0293164	0.185608	-4.58854		Pum2	0.5558	6.68198	2.47321	0.0248648	0.157359	-3.6858
Ggps1	-0.651521	6.2912	-2.30626	0.0346783	0.219428	-4.07285		1110038D17Rik	-1.61509	4.88413	-2.38896	0.0294339	0.186053	-3.49685		Pxmp2	4.16086	-0.02415	2.47261	0.0248949	0.157359	-3.9423
Ppp1r11	-0.512666	6.60543	-2.30555	0.0347264	0.219547	-4.19229		Stc2	4.52209	-1.68303	2.38892	0.0294359	0.186053	-3.83919		Ywhab	0.288637	8.83006	2.4726	0.0248952	0.157359	-4.26377
Cisd1	0.795747	5.70465	2.30539	0.0347373	0.219547	-3.91196		Edem1	-0.60724	7.42606	-2.38889	0.0294377	0.186053	-4.10794		Klf13	0.278353	8.68855	2.47255	0.0248978	0.157359	-4.28102
Rffl	-2.80428	3.08877	-2.30492	0.0347696	0.219624	-3.52871		Csf2	-3.86337	0.766481	-2.38803	0.0294886	0.186256	-3.79179		Iqgap2	0.980287	4.8902	2.47114	0.0249686	0.157715	-3.40841
Dcun1d4	2.19347	4.45346	2.30391	0.0348392	0.219936	-3.51515		Gpr34	-3.42091	3.95645	-2.38775	0.0295045	0.186256	-3.46206		Nfia	1.61657	3.37266	2.47007	0.0250222	0.157939	-3.35319
Cysltr1	-4.33037	-1.91653	-2.30323	0.0348862	0.220106	-3.83906		Leng8	-0.46935	8.00674	-2.3872	0.0295369	0.186256	-4.32923		Fundc2	0.555663	6.06413	2.46986	0.0250329	0.157939	-3.56417
2410091C18Rik	0.861246	5.43314	2.30239	0.0349436	0.220268	-3.89561		Nipbl	0.436588	6.77017	2.38718	0.0295382	0.186256	-4.01573		Plekhg2	1.06206	6.20404	2.46956	0.025048	0.157943	-3.4742
Ulbp1	-2.6822	3.10838	-2.30227	0.0349523	0.220268	-3.554		1110018G07Rik	0.895994	5.77493	2.38507	0.0296629	0.186935	-3.73677		Cma1	6.42424	-0.151877	2.46922	0.025065	0.157959	-3.78329
Cog8	-0.533965	6.36435	-2.30157	0.035	0.220441	-4.10653		BC046331	-1.74144	3.87326	-2.38361	0.029749	0.187369	-3.4037		Stk11	-3.00182	2.65689	-2.46801	0.0251261	0.158111	-3.5784
Ralgps1	2.3892	1.97096	2.30095	0.0350428	0.220584	-3.56571		Ccr4	1.34805	4.80942	2.37916	0.0300138	0.188927	-3.51612		B4galt5	3.11867	2.23272	2.4678	0.0251365	0.158111	-3.53765
Ifit3	-1.28976	3.75954	-2.30009	0.0351026	0.220833	-3.68167		Ier2	-0.504395	7.43476	-2.37802	0.0300819	0.189247	-4.21361		Eif4a2	-0.386527	8.67996	-2.46778	0.0251375	0.158111	-4.20062
Zfp455	4.27711	-0.131788	2.29955	0.0351396	0.220938	-3.81847		Adam10	0.485377	7.67024	2.37771	0.0301006	0.189256	-4.31131		Phtf2	-1.8296	4.11412	-2.46743	0.0251553	0.158111	-3.29529
Arhgef1	0.269641	9.49833	2.29831	0.0352257	0.221352	-4.94765		BC030867	-2.95721	1.07569	-2.37607	0.0301987	0.18964	-3.51003		Fam38a	2.78721	2.50045	2.46731	0.0251616	0.158111	-3.51633
Clcf1	-1.34316	4.09446	-2.29667	0.0353396	0.22194	-3.54101		Zfp295	1.24716	4.57028	2.37585	0.030212	0.18964	-3.47905		Eef2	0.271451	9.41585	2.46667	0.0251939	0.15819	-4.41945
Pdha1	-0.48319	7.05368	-2.29512	0.0354476	0.222363	-4.3047		Zfp827	2.77573	2.00047	2.37582	0.0302138	0.18964	-3.54896		Cchcr1	3.37341	1.66593	2.46648	0.0252032	0.15819	-3.55664
U2af1l4	0.694166	5.79913	2.29512	0.0354478	0.222363	-3.96239		Rrp1	0.360072	7.95126	2.37411	0.030317	0.190178	-4.34709		Tspyl4	-2.98844	2.24606	-2.46476	0.0252909	0.158632	-3.54604
Dnajb12	0.951203	4.64421	2.29345	0.0355648	0.222772	-3.6658		Armc7	-0.681117	6.46142	-2.37358	0.0303488	0.190268	-3.87464		Cs	0.407934	7.92717	2.46452	0.0253027	0.158632	-4.01752
Ccdc102a	-1.37001	4.14709	-2.2933	0.0355749	0.222772	-3.54539		P2ry10	-1.07871	5.09524	-2.37319	0.0303727	0.190309	-3.59434		Wipf1	-0.513171	7.40072	-2.46398	0.0253303	0.158714	-3.94041
Flnb	3.4092	2.14498	2.2932	0.0355825	0.222772	-3.66189		Rgs11	-2.65065	2.5901	-2.37188	0.0304514	0.190692	-3.49074		1500011B03Rik	-0.760906	5.43395	-2.46135	0.0254646	0.159464	-3.43285
Ncoa3	-0.3302	7.46081	-2.29302	0.0355945	0.222772	-4.4681		Mns1	-1.56754	2.96395	-2.37047	0.0305371	0.19112	-3.41549		Zfand1	-2.81531	4.14116	-2.45987	0.0255402	0.159808	-3.34936
Kdelc1	3.25016	2.20091	2.2919	0.0356733	0.223137	-3.6166		Bik	-3.62878	1.6779	-2.36946	0.0305986	0.191394	-3.75981		Ino80c	1.01022	5.45851	2.45971	0.0255488	0.159808	-3.41933
Myl9	4.32945	-1.8578	2.29065	0.035761	0.223557	-3.86657		Kif1c	-3.03952	1.40824	-2.36845	0.0306602	0.19167	-3.67491		Son	-0.323914	8.85331	-2.45858	0.0256067	0.159952	-4.25689
St8sia4	-0.736452	6.9673	-2.28993	0.0358117	0.223559	-4.25181		Brca1	-3.34062	1.36769	-2.36706	0.0307447	0.192038	-3.53035		6720463M24Rik	1.906	3.93488	2.45844	0.0256141	0.159952	-3.32251
Gclc	-1.51389	3.82179	-2.28959	0.0358357	0.223559	-3.55659		Urgcp	0.940342	5.60003	2.36691	0.0307543	0.192038	-3.68785		Mier2	-1.1934	4.50777	-2.4584	0.0256158	0.159952	-3.29108
Phf20	1.04319	4.81954	2.28948	0.0358433	0.223559	-3.73396		S1pr2	0.840755	5.39544	2.36575	0.0308249	0.192369	-3.65664		Wrn	1.29396	4.7884	2.45738	0.0256686	0.16019	-3.31214
Bag3	4.92876	0.609804	2.2892	0.0358635	0.223559	-3.77341		4930547N16Rik	-3.27787	0.951736	-2.3647	0.0308896	0.192663	-3.55831		Oasl1	-4.12163	1.87338	-2.45505	0.0257888	0.160848	-3.60417
2310028H24Rik	3.99919	-0.755556	2.28907	0.0358724	0.223559	-3.84042		Cenpc1	-1.02188	5.12068	-2.36283	0.0310043	0.193268	-3.61596		Kctd9	2.58167	2.70644	2.45474	0.025805	0.160857	-3.51404
Sh3bp5	-1.67918	3.5605	-2.28883	0.0358896	0.223559	-3.53665		Lmf1	1.19015	4.06221	2.36181	0.031067	0.193509	-3.49024		Slc9a3r1	0.308419	7.98817	2.45326	0.0258818	0.161237	-4.09756
Erbb2ip	0.588553	6.38097	2.28851	0.0359123	0.223559	-4.16883		Ccr10	-4.59925	-0.87944	-2.36163	0.0310785	0.193509	-3.84596		Acly	0.524758	8.25904	2.45299	0.0258955	0.161237	-4.1022
Phgdh	0.444828	7.51665	2.28799	0.0359492	0.223559	-4.47814		Golt1b	-0.556847	6.36708	-2.36118	0.0311064	0.193573	-3.94733		Ppid	-0.563689	6.28903	-2.4524	0.0259263	0.161337	-3.65484
4930524L23Rik	4.1787	-1.57879	2.28724	0.036002	0.223559	-3.87365		Ptrh1	3.15469	0.516825	2.3603	0.0311608	0.193801	-3.5688		Prps1	0.772688	6.64794	2.45155	0.0259706	0.161521	-3.74502
Dennd3	4.81258	-0.464863	2.287	0.036019	0.223559	-3.84022		Utp6	-1.46809	4.3213	-2.3594	0.0312166	0.194037	-3.45275		Slc16a6	-1.11324	5.24818	-2.45109	0.0259944	0.161577	-3.37803
Rcl1	0.854974	5.82447	2.2866	0.0360474	0.223559	-4.00685		Abhd15	-4.45052	1.33425	-2.35886	0.0312497	0.194092	-3.77199		Plekha5	1.73057	4.15966	2.4498	0.0260618	0.1618	-3.30051
Foxm1	4.7503	1.14373	2.28653	0.0360527	0.223559	-3.82274		Itpk1	-0.713121	5.91425	-2.35868	0.0312609	0.194092	-3.79287		Slc39a11	-1.33429	4.69003	-2.44952	0.0260767	0.1618	-3.30924
Cenpk	3.32486	2.68138	2.28643	0.0360592	0.223559	-3.64942		Zdhhc21	-2.30583	4.16478	-2.35834	0.0312818	0.194111	-3.43074		Cdc27	1.18725	5.43096	2.44947	0.0260791	0.1618	-3.51491
Arfgef1	-1.12973	5.43512	-2.2862	0.0360759	0.223559	-3.83689		Gm3002	2.59061	1.10047	2.35579	0.0314406	0.194948	-3.53892		Bsn	2.97642	2.01938	2.44927	0.0260896	0.1618	-3.62997
Gch1	1.94219	3.7288	2.28607	0.0360848	0.223559	-3.53911		Noxo1	4.23825	-1.66861	2.3554	0.0314651	0.194948	-3.87538		Ints5	0.929232	5.54463	2.44804	0.0261544	0.162109	-3.46695
Zbtb17	0.811074	5.13725	2.28592	0.0360958	0.223559	-3.82386		Hook3	0.536354	6.27503	2.35527	0.031473	0.194948	-3.94044		Dpy19l3	-1.03299	5.56569	-2.4474	0.0261878	0.162225	-3.53623
Tapbpl	-0.470178	7.10964	-2.28541	0.0361318	0.223559	-4.36407		Csrp1	-0.757166	6.03029	-2.35503	0.0314881	0.194948	-3.91131		Lrr1	5.39977	-0.121697	2.44682	0.0262184	0.162239	-3.8916
Bnip3	2.42888	3.31633	2.28522	0.0361455	0.223559	-3.54798		Psmb9	0.337903	8.43391	2.35332	0.0315952	0.195489	-4.54344		Gss	1.37997	4.09685	2.44679	0.0262198	0.162239	-3.30599
Rpp14	-1.03702	5.36221	-2.28488	0.0361692	0.223559	-3.84644		Irf2bp2	0.88456	5.07286	2.35287	0.0316237	0.195489	-3.60978		Trib2	0.597247	5.8725	2.44637	0.0262418	0.162283	-3.64003
Rpl10a	-0.260777	9.39234	-2.28486	0.0361709	0.223559	-4.96093		Pop5	0.576528	6.42098	2.35278	0.0316293	0.195489	-4.0143		Ngrn	-0.787844	5.64291	-2.4457	0.0262774	0.16233	-3.4917
Apbb1ip	-0.557248	6.35713	-2.28433	0.0362084	0.223626	-4.11836		Cep78	2.9573	2.73117	2.34949	0.0318363	0.196452	-3.49722		Fntb	-0.902334	5.30852	-2.44566	0.0262792	0.16233	-3.49239
Cd200r4	-3.94629	3.35699	-2.28413	0.0362227	0.223626	-3.63079		Atg7	1.34382	5.46827	2.3494	0.0318418	0.196452	-3.70738		Ctbp2	2.92424	0.645535	2.44524	0.0263017	0.162377	-3.76969
Creld1	3.42947	-0.808931	2.28084	0.0364578	0.224826	-3.73543		Capza2	-0.295835	8.46682	-2.3491	0.0318609	0.196452	-4.52628		Twf2	0.43066	7.38936	2.44487	0.0263212	0.162406	-3.97843
Gm10767	-1.96475	1.97571	-2.28084	0.0364583	0.224826	-3.62191		A630001G21Rik	0.830158	5.10629	2.34888	0.0318748	0.196452	-3.72009		Bcat1	4.3996	1.60488	2.44428	0.0263521	0.162504	-3.68946
Tnip2	0.992343	3.8839	2.28014	0.0365085	0.224964	-3.67092		Slc25a13	3.19122	2.90179	2.34888	0.031875	0.196452	-3.4948		Wipi2	0.667854	5.64424	2.44352	0.0263924	0.162598	-3.4971
Miat	-4.55877	-1.2222	-2.27995	0.0365218	0.224964	-3.86477		Jazf1	4.14227	1.30486	2.34797	0.0319325	0.196635	-3.64836		Zfyve1	2.89889	2.93785	2.44343	0.026397	0.162598	-3.53449
Dnajc10	0.753994	6.16473	2.27871	0.0366107	0.225055	-4.11969		Stx7	-0.928717	5.09148	-2.34784	0.0319407	0.196635	-3.70859		Ttc37	-1.85375	4.02777	-2.4429	0.0264253	0.16268	-3.33297
Fbxo47	4.23797	-1.55603	2.27866	0.0366145	0.225055	-3.87965		Gnb2	-0.333666	7.33077	-2.34741	0.0319681	0.196692	-4.27294		Txnip	-0.496644	7.94962	-2.44256	0.026443	0.162697	-4.19399
1600012H06Rik	-0.677368	5.47597	-2.27856	0.0366214	0.225055	-3.91804		Ipo4	0.811149	4.72626	2.34405	0.0321816	0.197874	-3.66401		Sirt5	-2.42277	2.72468	-2.44124	0.0265133	0.163038	-3.5485
Klhl2	-4.26401	-0.150975	-2.27824	0.0366447	0.225055	-3.8525		Adh1	2.07484	3.22652	2.34308	0.0322437	0.197874	-3.46912		Tmtc4	-2.59947	2.77896	-2.44094	0.0265291	0.163043	-3.39487
Cnot2	-0.660097	7.14688	-2.27823	0.0366457	0.225055	-4.36976		Ctsz	0.703424	6.66312	2.34261	0.0322736	0.197874	-4.08459		Usf1	-0.574594	6.3194	-2.43959	0.026601	0.163393	-3.68992
Hbegf	-3.62781	-0.355018	-2.27802	0.0366603	0.225055	-3.74878		Siae	1.78304	4.44116	2.34261	0.0322737	0.197874	-3.5086		Dcun1d4	2.30047	4.45346	2.43888	0.0266392	0.163536	-3.34236
Rce1	0.753778	5.75223	2.27721	0.0367187	0.225286	-4.02266		Fgfr1op2	-0.362004	7.88282	-2.34252	0.0322794	0.197874	-4.41472		Eif2c2	1.97063	4.69755	2.43831	0.0266693	0.163628	-3.31751
Ttc15	0.73534	6.01039	2.27619	0.0367923	0.225611	-4.08797		Fmnl1	-0.394067	8.01553	-2.3422	0.0322998	0.197874	-4.47724		Mob3c	-0.88911	5.07629	-2.43752	0.0267118	0.163797	-3.45405
Hn1	0.262978	9.08893	2.27573	0.0368258	0.22569	-4.86236		Nipsnap1	0.837512	5.61793	2.34218	0.0323008	0.197874	-3.8092		Nhp2	0.617334	6.68757	2.43667	0.0267572	0.163984	-3.79465
Timp2	1.61535	4.73373	2.27482	0.0368917	0.225892	-3.74631		Pink1	0.766419	6.54756	2.34194	0.032316	0.197874	-4.01578		Fbxw17	3.24637	3.01131	2.43599	0.0267938	0.1641	-3.48101
2210404O07Rik	2.7304	3.15514	2.27435	0.0369257	0.225892	-3.57697		Lilrb4	-3.88351	0.905751	-2.34157	0.0323401	0.197874	-3.6788		Gpr160	4.77459	1.10961	2.43576	0.0268063	0.1641	-3.69086
Rps18	-0.260373	10.1369	-2.2742	0.0369364	0.225892	-5.19692		Tcf3	-0.533034	7.06693	-2.34155	0.0323415	0.197874	-4.13242		Pstpip1	-0.55323	6.35764	-2.43319	0.0269445	0.164854	-3.66809
Galns	1.1494	4.60028	2.27413	0.0369415	0.225892	-3.77336		Csnk1g2	1.14422	4.74919	2.34096	0.0323788	0.197992	-3.56348		Zswim6	3.26693	1.4206	2.43245	0.0269844	0.165005	-3.71933
Llgl1	1.0891	4.90979	2.27259	0.0370538	0.226408	-3.70064		Fundc1	0.85675	6.27625	2.34052	0.0324074	0.198056	-3.96352		Agtpbp1	3.29246	2.68896	2.43178	0.0270209	0.165077	-3.56695
Lman2l	1.14822	4.0035	2.2724	0.0370675	0.226408	-3.62912		D130040H23Rik	2.84509	2.99679	2.33952	0.0324713	0.198335	-3.50091		Gm608	-1.56557	4.59652	-2.43167	0.0270264	0.165077	-3.33431
Fermt3	-0.261005	8.79924	-2.2705	0.0372058	0.227126	-4.84899		Mre11a	-1.13471	5.14525	-2.33901	0.0325044	0.198347	-3.61482		Mapkbp1	-4.37795	-0.209253	-2.43069	0.0270798	0.165286	-3.89508
Tmed3	0.698453	5.55593	2.27001	0.0372419	0.227219	-3.90665		Prmt5	-0.614173	6.13726	-2.33893	0.0325097	0.198347	-3.91142		Brms1	-0.592408	6.35291	-2.43048	0.0270909	0.165286	-3.70457
Tmem177	2.85885	3.95549	2.26918	0.0373023	0.227461	-3.55671		Kras	0.79538	6.42701	2.33768	0.0325899	0.198726	-4.07835		Pex5	0.831951	5.77088	2.42988	0.0271236	0.165311	-3.56327
Athl1	0.788497	4.99476	2.26807	0.0373838	0.22783	-3.88067		Kif20a	-1.14861	2.76462	-2.33669	0.032654	0.199006	-3.63049		Ppcdc	-0.538041	7.10255	-2.42985	0.0271253	0.165311	-3.85859
Spty2d1	-0.93363	5.31256	-2.26775	0.0374074	0.227847	-3.86707		Alyref2	-1.81195	3.44575	-2.33553	0.0327292	0.199217	-3.47808		Atg3	0.450713	6.88636	2.42934	0.0271531	0.165389	-3.87892
Lrrc25	-4.49296	-1.74	-2.26731	0.0374396	0.22789	-3.86411		Shmt1	1.46654	3.51368	2.33508	0.0327581	0.199217	-3.48056		Cpeb2	4.17465	0.481674	2.42832	0.0272086	0.165634	-3.87255
Laptm5	0.218093	10.959	2.26697	0.0374647	0.22789	-5.43745		Ckap5	-0.890631	6.06514	-2.33487	0.0327717	0.199217	-3.90569		Pkp4	-2.05253	3.15372	-2.42751	0.0272529	0.165811	-3.40839
Psme2	-0.292109	9.29826	-2.26645	0.0375031	0.22789	-4.98223		Lactb2	-0.997311	4.78353	-2.33474	0.0327806	0.199217	-3.59999		Lyz2	5.47301	1.28981	2.42619	0.0273248	0.166156	-3.67912
Hibadh	0.629893	5.84293	2.26635	0.03751	0.22789	-4.11596		Orai1	0.995467	5.89681	2.33439	0.0328029	0.199217	-3.88188		Gzmc	4.97669	-1.24721	2.42577	0.0273476	0.166202	-3.94666
Nudcd3	-0.61075	6.44269	-2.26599	0.037537	0.22789	-4.20541		Pigu	0.582199	6.11923	2.33409	0.0328224	0.199217	-3.97747		Cd93	-2.16935	1.79262	-2.42486	0.0273974	0.166412	-3.46959
Hsf2	1.49647	3.77379	2.26574	0.0375555	0.22789	-3.56632		Gm5547	-1.40876	3.9407	-2.33402	0.0328272	0.199217	-3.46717		Pcyt2	-0.508199	6.68166	-2.42391	0.0274495	0.166636	-3.80094
Auh	-0.942561	4.91024	-2.26567	0.0375606	0.22789	-3.73668		Vamp1	1.2966	4.95176	2.3339	0.0328347	0.199217	-3.64289		Aif1	3.75947	0.335587	2.42287	0.0275071	0.166892	-3.93397
Sytl3	-2.46482	5.14212	-2.26507	0.0376047	0.228031	-3.57109		Shc1	-0.509674	6.49655	-2.33224	0.0329431	0.199647	-4.01797		Hspb6	3.72446	-0.100244	2.4221	0.0275493	0.167056	-3.85129
Rnaseh1	-1.30569	3.70933	-2.26439	0.0376547	0.228164	-3.58855		Dhrs13	-2.71027	1.03666	-2.33202	0.0329577	0.199647	-3.59305		Tmem149	-0.68006	6.43357	-2.42136	0.0275901	0.167207	-3.67623
Adck3	1.25809	4.35506	2.26421	0.0376685	0.228164	-3.7872		Fen1	-0.813414	5.80899	-2.33197	0.0329605	0.199647	-3.90741		Map2k4	-0.697387	6.4969	-2.42109	0.0276049	0.167207	-3.76114
Jakmip1	-0.951146	5.99904	-2.26369	0.0377067	0.228269	-4.02086		Tulp4	-1.15832	4.7077	-2.33158	0.0329859	0.19968	-3.59936		Pias1	-0.727117	6.72442	-2.42032	0.0276473	0.167371	-3.83926
Limk1	1.78811	3.44732	2.26086	0.0379164	0.22926	-3.56857		Tigd2	0.742368	5.65713	2.33133	0.0330025	0.19968	-3.82108		Ube4a	1.14954	5.65073	2.41992	0.0276697	0.167414	-3.53815
1700052N19Rik	1.68156	4.65885	2.26079	0.0379213	0.22926	-3.70024		Naa25	-0.838094	5.26369	-2.32972	0.0331075	0.200204	-3.69212		Glmn	-1.63976	4.04778	-2.41769	0.0277934	0.168069	-3.34799
Il23r	-4.75837	-1.1027	-2.26032	0.0379567	0.22926	-3.87441		4930431P03Rik	3.7406	0.73246	2.32818	0.0332089	0.200699	-3.70241		Srgn	0.237064	10.1814	2.41629	0.0278711	0.168395	-4.65187
Clint1	-0.471878	6.5343	-2.26005	0.0379765	0.22926	-4.25038		5830432E09Rik	-1.25687	3.89368	-2.32792	0.0332261	0.200699	-3.4826		Dbp	-1.57233	3.1014	-2.41617	0.0278781	0.168395	-3.42185
Lrba	2.55313	3.49135	2.25998	0.0379821	0.22926	-3.56952		Cstb	0.450499	6.71913	2.32687	0.033295	0.201004	-4.13027		C920006O11Rik	-2.89052	3.00355	-2.41565	0.027907	0.168476	-3.50064
Manba	-1.33805	4.83167	-2.25951	0.038017	0.22926	-3.75534		Hdac4	0.926595	4.53021	2.32636	0.0333287	0.201023	-3.64697		Mettl22	-1.60987	4.01245	-2.41521	0.0279312	0.168505	-3.37013
Tspan17	4.59481	-1.28222	2.2595	0.0380175	0.22926	-3.87951		Ccnk	0.729863	5.09374	2.32619	0.0333395	0.201023	-3.69152		Fos	5.28826	-0.625594	2.41501	0.0279427	0.168505	-3.94711
Cnpy3	-0.807569	5.10699	-2.25854	0.0380895	0.229499	-3.86233		Setd7	1.52393	4.03734	2.32598	0.0333534	0.201023	-3.47763		Pmel	3.63358	-0.01421	2.41469	0.0279603	0.168518	-3.96277
Rasgrp4	1.95681	2.18062	2.25841	0.0380992	0.229499	-3.62386		Alkbh6	0.690448	5.92107	2.32489	0.0334257	0.201347	-3.84808		Tmem203	-1.26381	3.91486	-2.41377	0.028012	0.168737	-3.35312
Tpx2	2.06799	4.44929	2.25766	0.0381553	0.229711	-3.57254		Mpp2	5.02533	-1.38155	2.32452	0.0334496	0.20138	-3.82284		Ebag9	-1.17402	4.36273	-2.41321	0.0280435	0.168833	-3.35784
Rfc4	1.26639	4.86521	2.25576	0.0382975	0.230034	-3.66628		Prkra	3.83204	1.59784	2.32402	0.033483	0.201402	-3.63892		Utp11l	-0.551024	6.26272	-2.41214	0.0281036	0.169102	-3.68597
Tm4sf5	3.87099	-2.10118	2.25556	0.0383119	0.230034	-3.90947		Insig1	-1.08754	5.12234	-2.32391	0.0334901	0.201402	-3.65854		Btbd6	-1.57527	4.58795	-2.4108	0.0281789	0.169346	-3.35484
Casp7	-1.11029	5.47265	-2.25522	0.0383375	0.230034	-3.84974		Prrt2	3.22849	1.89721	2.32311	0.0335431	0.201548	-3.60608		Churc1	-0.346499	7.73442	-2.41034	0.0282048	0.169346	-4.08161
Spice1	-1.70401	4.68411	-2.25513	0.0383444	0.230034	-3.62208		Zfp94	2.07019	3.17096	2.32299	0.0335515	0.201548	-3.5047		Uhrf2	0.673598	6.01919	2.4102	0.0282125	0.169346	-3.64471
Sp110	-0.229916	8.73898	-2.25511	0.0383463	0.230034	-4.84028		Gm13154	3.54022	-0.696852	2.32271	0.0335698	0.201548	-3.88547		Wdr45l	-0.859103	5.44906	-2.41006	0.0282204	0.169346	-3.56113
Snrpd3	-0.488186	6.84138	-2.25485	0.0383659	0.230034	-4.28156		Hmgcl	0.577036	6.20435	2.32192	0.0336225	0.201754	-4.0072		Cad	1.17541	4.60857	2.41004	0.0282218	0.169346	-3.36828
Emg1	-0.391406	7.09264	-2.25467	0.0383794	0.230034	-4.41641		Pcyt1a	-3.21327	1.11447	-2.32058	0.0337116	0.202177	-3.60088		Zc3h18	0.951552	4.55297	2.40974	0.0282387	0.169354	-3.39655
Ppp2r2a	-0.421967	7.43395	-2.2543	0.0384069	0.230034	-4.48255		Nub1	-0.493745	7.0697	-2.32025	0.0337336	0.202198	-4.17083		Fam134b	-0.782361	5.81594	-2.40869	0.0282978	0.169485	-3.54635
Rrp15	0.910766	5.01168	2.25418	0.0384158	0.230034	-3.8418		Elf4	-0.637907	6.92251	-2.31843	0.0338548	0.202813	-4.21461		Rps18	-0.268913	10.1369	-2.40855	0.0283055	0.169485	-4.72119
Rnmt	0.813786	5.55061	2.254	0.0384299	0.230034	-3.89881		Gm14005	-1.17435	3.88862	-2.31777	0.0338994	0.202866	-3.5328		BC021614	-0.736824	5.57166	-2.40852	0.028307	0.169485	-3.46237
Mfsd3	-2.34694	3.40914	-2.25385	0.0384409	0.230034	-3.57777		Rab4a	-2.95952	3.53627	-2.31774	0.0339008	0.202866	-3.55987		Vwa5a	-2.07348	4.96639	-2.40763	0.0283579	0.169696	-3.36302
4833442J19Rik	-1.04286	5.09367	-2.25347	0.0384693	0.230078	-3.83274		2510002D24Rik	0.651923	6.18212	2.31718	0.0339387	0.202981	-3.94985		Ergic1	-0.651944	5.77772	-2.40673	0.0284084	0.169906	-3.56178
Ahcy	0.647036	5.84295	2.25303	0.0385029	0.230082	-4.03366		Gpr160	-4.28529	1.10961	-2.31659	0.0339781	0.203014	-3.62524		Ccdc59	-0.927893	5.4541	-2.40642	0.0284264	0.16992	-3.53388
Psmb3	-0.286908	8.38755	-2.2529	0.0385121	0.230082	-4.71643		Ttc21b	3.7688	2.00084	2.31628	0.0339988	0.203014	-3.67652		Prpf40b	-3.70942	1.31737	-2.40502	0.0285057	0.170301	-3.72995
Fancg	2.95996	3.51624	2.25233	0.0385555	0.230215	-3.59835		Mafg	3.07298	2.83777	2.31627	0.034	0.203014	-3.49718		Agps	0.822535	5.4058	2.40445	0.0285385	0.170404	-3.60486
Zmym1	1.52112	4.13613	2.25151	0.0386171	0.230427	-3.62099		Sumo3	-0.51027	7.14565	-2.31457	0.0341137	0.203582	-4.27309		Herc6	-0.873745	5.96558	-2.40409	0.028559	0.170433	-3.64545
AI607873	-2.66217	0.909025	-2.25126	0.0386359	0.230427	-3.75379		Slc25a20	0.825528	5.09035	2.31423	0.0341372	0.203611	-3.72413		Eif2s3x	0.484494	7.23984	2.40351	0.0285919	0.170535	-3.9812
Mtmr6	0.86265	6.15041	2.25102	0.0386544	0.230427	-4.1154		5730469M10Rik	3.63011	2.50534	2.31331	0.0341988	0.203782	-3.59362		Ddr1	-2.41827	3.30297	-2.40299	0.0286218	0.170535	-3.47039
Zfp281	-1.00702	5.49884	-2.24982	0.0387452	0.230843	-3.97267		Lztfl1	-2.76484	4.44673	-2.31298	0.0342212	0.203782	-3.51309		Gm4532	3.23166	0.991294	2.40296	0.028623	0.170535	-3.8753
Rnmtl1	-2.68814	2.69232	-2.24933	0.0387827	0.23094	-3.61174		Flii	-0.420232	7.03602	-2.31297	0.034222	0.203782	-4.26162		Ust	2.10897	0.907084	2.40207	0.028674	0.170746	-3.4857
Nfkbie	0.724732	6.15533	2.24839	0.0388536	0.231169	-4.21032		Exoc2	-0.608042	6.93958	-2.31235	0.0342637	0.203792	-4.17554		Psma3	0.304751	8.48047	2.40096	0.0287377	0.171032	-4.26865
Snx11	1.23049	4.92094	2.24821	0.0388676	0.231169	-3.74251		Prkd2	-0.612429	6.95282	-2.31203	0.0342857	0.203792	-4.22067		Phb2	0.44123	7.42932	2.40044	0.0287675	0.171116	-4.01205
Tbc1d22b	-0.581001	6.15965	-2.24799	0.0388847	0.231169	-4.11516		Rg9mtd1	-0.856918	5.92789	-2.31194	0.0342914	0.203792	-3.86565		Paxip1	1.21196	5.18016	2.40004	0.0287905	0.171159	-3.46545
Ubc	-0.224815	9.40027	-2.24736	0.0389321	0.231325	-5.05859		Slc16a5	-2.21638	0.656349	-2.31184	0.0342983	0.203792	-3.55446		Lnx1	3.4228	0.403444	2.39879	0.0288623	0.171324	-3.89337
Cope	-0.314194	8.04093	-2.24659	0.038991	0.231469	-4.66297		Bivm	4.01983	1.39633	2.31028	0.034404	0.204309	-3.64801		H3f3b	0.278843	10.6625	2.39879	0.0288624	0.171324	-4.87927
Haus3	0.651567	6.07456	2.24649	0.0389988	0.231469	-4.08922		C1qbp	-0.541046	6.51965	-2.30892	0.0344962	0.204644	-4.08894		Eif4e	0.445078	7.35056	2.39856	0.0288758	0.171324	-4.03874
Ier3	-4.21122	-1.62252	-2.24437	0.0391606	0.232303	-3.88953		Cbx6	1.12738	4.61193	2.3089	0.0344979	0.204644	-3.63331		Cct4	0.388066	8.37976	2.39847	0.0288811	0.171324	-4.27539
Rab2a	-0.56554	7.28118	-2.2436	0.0392195	0.232482	-4.46202		Rplp1	0.292069	10.2676	2.30704	0.0346247	0.205285	-5.0813		Rnf167	-0.309783	8.63421	-2.39799	0.0289087	0.171335	-4.33787
2010106G01Rik	-0.572118	6.6727	-2.24342	0.0392333	0.232482	-4.25393		2310001A20Rik	-0.809138	5.68947	-2.30625	0.0346788	0.205494	-3.82436		Ttk	4.0783	1.76925	2.3977	0.0289255	0.171335	-3.66849
Lrch3	-0.836748	5.81275	-2.24264	0.0392933	0.23259	-4.06318		Cyp2d22	-5.26856	-0.213604	-2.30525	0.0347472	0.205787	-3.86322		Brf1	-0.569704	6.22796	-2.39762	0.0289299	0.171335	-3.7634
Smarcd1	0.991994	4.86346	2.24243	0.0393099	0.23259	-3.82949		4933406I18Rik	2.65974	1.26802	2.30357	0.0348623	0.206357	-3.75134		Rhebl1	1.94387	3.34231	2.39717	0.0289558	0.171395	-3.46797
Naa30	-1.4592	4.14013	-2.24215	0.0393313	0.23259	-3.63035		Gabpb2	-0.809166	5.14695	-2.30264	0.0349267	0.20659	-3.77953		Nisch	-0.513997	7.16142	-2.39575	0.0290381	0.171789	-3.95093
Ccdc23	-0.543485	5.73963	-2.24186	0.0393534	0.23259	-4.02875		Zfp146	4.32681	-1.02841	2.30232	0.0349488	0.20659	-3.88769		Lipt1	4.46295	0.587232	2.3951	0.0290756	0.171871	-3.95828
Rcsd1	0.48996	7.14601	2.2418	0.0393581	0.23259	-4.47607		Phtf2	1.74034	4.11412	2.30217	0.0349585	0.20659	-3.51317		Tmx3	-0.649221	6.64649	-2.39497	0.0290835	0.171871	-3.85786
Tctn1	-4.00264	-0.524655	-2.24089	0.0394282	0.232842	-3.86162		Nmt1	-0.615298	6.38507	-2.30177	0.0349864	0.206643	-4.05409		Mtmr14	1.2371	5.03978	2.39462	0.0291034	0.171896	-3.47274
Tcea2	-1.44299	3.58857	-2.24031	0.0394727	0.232842	-3.59686		Cox7a2	-0.305827	8.03962	-2.30037	0.0350832	0.207025	-4.53174		Tbrg1	-0.471495	7.55027	-2.39227	0.02924	0.172488	-4.05378
Igfbp4	-3.39105	4.36525	-2.24029	0.0394743	0.232842	-3.6083		Fubp3	1.7446	4.37163	2.30029	0.0350889	0.207025	-3.54182		Efha1	0.709598	6.16562	2.39217	0.0292462	0.172488	-3.70368
Agpat4	3.52683	2.39111	2.23987	0.0395065	0.232842	-3.72507		Tbc1d19	4.34204	0.420394	2.29882	0.0351902	0.207457	-3.87481		Ccng2	0.994794	6.24457	2.39208	0.029251	0.172488	-3.74956
Scpep1	1.49941	4.20622	2.23933	0.0395486	0.232842	-3.62115		Marveld2	4.02796	0.927455	2.2986	0.0352055	0.207457	-3.69363		Gpr83	4.56931	0.0856726	2.3915	0.0292854	0.172597	-3.93079
AB124611	0.957772	5.83924	2.23923	0.0395566	0.232842	-3.98693		Psmf1	0.58038	6.19205	2.2983	0.0352264	0.207457	-3.98995		Jtb	-0.478812	6.7761	-2.39069	0.0293323	0.172724	-3.90881
P2ry14	-5.17988	-1.01929	-2.23923	0.0395566	0.232842	-3.86593		Naa15	-0.762458	6.21875	-2.29813	0.0352382	0.207457	-4.0002		Rnaseh1	-1.31452	3.70933	-2.39059	0.0293385	0.172724	-3.3871
Steap3	4.05154	1.21304	2.23903	0.0395714	0.232842	-3.81851		Srm	-0.623239	5.99478	-2.29687	0.0353257	0.20786	-3.95813		Trim30a	-0.659299	6.83896	-2.38972	0.0293891	0.172929	-3.85546
Psmd13	0.92453	6.10884	2.23763	0.0396801	0.233356	-4.09668		Pdcd6	0.411481	7.3721	2.2957	0.0354077	0.20823	-4.38127		Urgcp	-0.913	5.60003	-2.38845	0.0294634	0.173272	-3.55442
Ccdc61	1.18738	4.09652	2.23647	0.0397706	0.233762	-3.65516		Cd274	0.686288	5.25726	2.29415	0.0355158	0.208573	-3.80506		Hn1l	1.01595	5.60725	2.38773	0.0295062	0.17343	-3.5473
Elf2	-0.682055	5.10239	-2.2357	0.0398298	0.233984	-3.92382		Trim30d	1.72662	4.05036	2.29366	0.03555	0.208573	-3.54127		Dusp23	-1.85031	2.65741	-2.38685	0.029558	0.173641	-3.55813
Fam86	-0.921305	5.02129	-2.23485	0.0398964	0.234249	-3.88796		Sh3gl1	-0.478292	7.26553	-2.29337	0.0355699	0.208573	-4.30423		Kbtbd8	-3.39292	1.98571	-2.38601	0.0296075	0.173838	-3.60656
Ldb1	-0.898309	5.71711	-2.2344	0.0399314	0.234329	-4.06727		Ccne2	-2.76247	1.39974	-2.29313	0.0355873	0.208573	-3.66281		Zswim7	-4.37348	1.33335	-2.38259	0.0298098	0.174922	-3.8802
A130049A11Rik	3.60067	1.83519	2.23343	0.0400074	0.234648	-3.7507		Utp11l	0.539523	6.26272	2.29287	0.0356051	0.208573	-4.02404		Yipf3	0.507911	7.07119	2.38235	0.0298241	0.174922	-3.95397
Itpk1	-0.671765	5.91425	-2.23272	0.0400623	0.234845	-4.06646		Gstp1	0.284597	8.13955	2.29265	0.035621	0.208573	-4.55015		Ier3ip1	-0.423708	7.37971	-2.38142	0.0298793	0.175152	-4.04129
Aaas	0.739291	6.01083	2.23232	0.0400937	0.234902	-4.142		Smad3	0.961943	6.22639	2.29263	0.0356221	0.208573	-3.97422		Tmbim1	4.64152	2.82861	2.38074	0.0299195	0.175293	-3.61067
Kdelc2	2.13338	2.68167	2.22971	0.0402984	0.235975	-3.62336		Fcrl1	1.87254	2.4767	2.29255	0.0356279	0.208573	-3.52411		Cd200	3.61987	4.06592	2.3793	0.0300054	0.175702	-3.58591
Upf3a	1.05859	4.76706	2.2294	0.0403232	0.235993	-3.79901		Chek1	-3.25747	2.23369	-2.2924	0.0356381	0.208573	-3.58284		Mki67ip	0.540486	6.85102	2.37884	0.0300327	0.175768	-3.92438
Itch	-0.715052	6.36312	-2.2288	0.0403703	0.236142	-4.18579		Qsox2	2.86269	1.89376	2.29163	0.0356922	0.208779	-3.72781		Shkbp1	0.680891	6.59724	2.37827	0.0300672	0.175875	-3.79792
Thy1	-0.338619	7.7497	-2.22839	0.040403	0.236207	-4.6228		Fut7	-4.5933	-0.899115	-2.29064	0.0357622	0.209076	-3.88909		Saal1	1.42492	4.69363	2.3771	0.0301374	0.176123	-3.42739
Cox15	-0.718792	5.43935	-2.22755	0.0404689	0.236317	-4.00606		Tpp1	0.733145	6.58711	2.29021	0.035792	0.209138	-4.15667		Ddx43	-1.30976	3.94845	-2.37702	0.0301417	0.176123	-3.40522
Tmbim4	0.495588	6.46151	2.22753	0.0404706	0.236317	-4.2901		Pafah1b3	1.26621	3.87733	2.2894	0.0358496	0.209362	-3.56081		Psen1	-0.44745	7.29494	-2.37637	0.030181	0.176193	-4.00704
Eif2d	0.828389	5.63696	2.22732	0.0404868	0.236317	-3.96388		Rhod	4.97223	-1.14875	2.28742	0.0359893	0.210066	-3.8948		Pygm	3.91098	-0.257614	2.37615	0.0301941	0.176193	-3.91295
Mib1	3.37316	0.961887	2.22697	0.0405147	0.236351	-3.76994		Pxn	-0.964011	5.70159	-2.2857	0.0361113	0.210665	-3.88766		Ift57	-1.74515	3.04147	-2.37602	0.0302021	0.176193	-3.4606
Smarcb1	0.535087	6.42352	2.2265	0.0405517	0.236351	-4.28434		Mettl22	1.54908	4.01245	2.28471	0.0361816	0.210911	-3.5372		Xaf1	-0.789973	6.33092	-2.37491	0.0302687	0.176487	-3.79906
Leprotl1	-0.31279	8.71975	-2.22617	0.0405779	0.236351	-4.88729		2010011I20Rik	0.938166	4.94034	2.28456	0.036192	0.210911	-3.71342		Ccdc17	-1.58327	3.86775	-2.37299	0.0303845	0.177067	-3.41889
Ahi1	3.56342	2.58846	2.22616	0.0405791	0.236351	-3.66708		Cdkn2c	0.783906	4.92584	2.28284	0.0363149	0.211514	-3.79714		Rpl38	-0.265969	8.83369	-2.37207	0.0304404	0.177218	-4.43677
Heatr2	-2.75402	3.931	-2.22459	0.0407034	0.236948	-3.61905		Ercc6l	-2.27575	1.4276	-2.28131	0.0364241	0.211713	-3.55621		Parp12	-4.05482	1.72093	-2.37187	0.0304526	0.177218	-3.68545
Ncf1	-4.1165	0.334177	-2.22415	0.0407384	0.237025	-3.89718		Plod3	3.32526	2.47411	2.28131	0.0364242	0.211713	-3.60145		Pomp	0.357294	7.80756	2.37176	0.0304591	0.177218	-4.15609
Snx13	1.01748	4.5089	2.22384	0.040763	0.237042	-3.80581		Jak2	0.54076	6.405	2.28117	0.0364341	0.211713	-4.03807		Wdhd1	0.95376	4.55976	2.37051	0.0305349	0.177541	-3.44715
Mfsd12	4.01535	-1.4957	2.22099	0.0409904	0.238169	-3.92764		Zcwpw1	2.57797	2.83566	2.28047	0.0364846	0.211713	-3.63176		1810012P15Rik	-1.54746	4.3967	-2.37031	0.0305471	0.177541	-3.46103
Prdx3	0.735942	6.50536	2.22086	0.0410004	0.238169	-4.29566		Ifit3	2.70059	3.75954	2.28046	0.0364852	0.211713	-3.57943		Gpr34	-1.2525	3.95645	-2.3676	0.0307118	0.178256	-3.54697
Mapre3	1.79611	3.22262	2.21888	0.041159	0.238963	-3.6386		Eif4ebp2	-0.833076	5.18049	-2.28036	0.0364923	0.211713	-3.83172		Akr1b10	-1.01096	5.08657	-2.36725	0.0307333	0.178256	-3.53086
Wdr26	1.06233	5.72607	2.2171	0.0413021	0.239666	-4.17634		Ltb4r1	-4.76147	0.0306515	-2.28017	0.0365057	0.211713	-3.85999		Rnf144a	-1.12529	4.93811	-2.36708	0.0307438	0.178256	-3.48395
Gemin6	2.57518	3.32965	2.21677	0.0413289	0.239695	-3.64049		Usp5	0.520081	6.43704	2.28017	0.036506	0.211713	-4.1375		Nhp2l1	0.420452	8.08171	2.36699	0.030749	0.178256	-4.26599
Scrib	3.13395	3.21224	2.21583	0.041404	0.240003	-3.63684		Eif2b3	0.927508	4.94661	2.27992	0.0365237	0.211713	-3.73491		Fam101b	0.9274	4.75614	2.36695	0.0307518	0.178256	-3.49631
Chaf1b	0.999698	5.00029	2.21412	0.0415424	0.240586	-3.81484		Rapsn	3.16193	0.174081	2.2796	0.0365472	0.211737	-3.72401		Trip11	-0.572215	6.04008	-2.36427	0.0309161	0.179113	-3.72801
Gm10845	0.567632	6.27717	2.21383	0.0415657	0.240586	-4.27287		Cep55	-1.65408	2.49684	-2.27745	0.0367019	0.212284	-3.57001		1700054N08Rik	2.63368	3.03418	2.36217	0.0310448	0.179764	-3.59886
Chdh	-2.12753	1.69181	-2.21377	0.0415707	0.240586	-3.65069		Rrp9	-0.7691	5.63899	-2.27699	0.0367348	0.212284	-3.92211		Snrpb2	0.45074	6.60705	2.36177	0.03107	0.179814	-3.88416
Cs	0.375342	7.92717	2.21333	0.0416066	0.240609	-4.69116		Atg4d	-0.682815	5.58848	-2.27693	0.0367389	0.212284	-3.93587		Tmem109	0.741616	5.62629	2.36054	0.0311458	0.179874	-3.67619
Aplp2	-0.619834	7.50013	-2.21284	0.0416463	0.240609	-4.61086		Tax1bp1	-0.416821	8.11383	-2.27631	0.0367838	0.212284	-4.55137		BC017612	-3.67779	1.12164	-2.36046	0.0311507	0.179874	-3.91664
Cln3	-0.539794	6.36958	-2.21248	0.0416755	0.240609	-4.30286		Ralgps1	2.33079	1.97096	2.27619	0.0367924	0.212284	-3.61355		Lmnb2	1.53174	4.02892	2.36027	0.0311625	0.179874	-3.42782
1700096K18Rik	-1.81126	2.81149	-2.21226	0.0416934	0.240609	-3.63481		Hist1h2bm	-3.314	-0.528409	-2.27592	0.0368122	0.212284	-3.81412		Ung	1.33286	3.59065	2.36021	0.031166	0.179874	-3.42846
Ubiad1	1.04245	4.75717	2.21223	0.041696	0.240609	-3.87564		Sirt5	2.27341	2.72468	2.27556	0.0368384	0.212284	-3.6169		Zfp420	-2.77006	2.88793	-2.36017	0.0311689	0.179874	-3.56049
Pex11c	3.03563	1.66633	2.21204	0.0417107	0.240609	-3.71782		Rbm3	-0.381096	9.2337	-2.27537	0.0368516	0.212284	-4.86051		Snrpd1	0.587669	6.38181	2.36	0.0311793	0.179874	-3.8393
Mif4gd	-0.633111	6.22454	-2.21182	0.041729	0.240609	-4.25241		Inf2	-2.99915	1.8419	-2.27527	0.0368594	0.212284	-3.60631		Mto1	-1.07032	5.19495	-2.3596	0.0312037	0.17992	-3.54346
Slc50a1	0.385254	7.45506	2.21131	0.0417702	0.240719	-4.60026		Prpf38a	-0.965015	5.67087	-2.27524	0.0368615	0.212284	-3.91997		Dhx36	-0.98539	5.26516	-2.35851	0.0312717	0.180145	-3.54366
Ampd3	4.5146	0.464687	2.2107	0.0418202	0.24088	-3.8477		Bzw2	0.416529	7.72376	2.27523	0.0368619	0.212284	-4.40505		Arl2	-1.10056	4.26125	-2.35811	0.0312966	0.180145	-3.43208
Atf2	0.473332	6.1745	2.20962	0.0419081	0.241259	-4.24777		Gcat	1.0927	4.03233	2.27505	0.0368751	0.212284	-3.61568		Cryl1	-1.67975	3.87298	-2.35787	0.0313113	0.180145	-3.44006
Stx17	-1.22956	4.41285	-2.20759	0.0420738	0.242085	-3.70065		LOC622070	3.45571	0.865784	2.2744	0.0369222	0.212444	-3.76681		Rsad1	-2.39689	2.08427	-2.35777	0.0313176	0.180145	-3.63599
Pmvk	2.09045	3.76505	2.20643	0.0421692	0.242472	-3.64279		Erap1	-0.547762	7.42273	-2.27388	0.0369599	0.212524	-4.33406		Tmem229b	-0.772741	6.71936	-2.35765	0.0313252	0.180145	-3.92511
Hells	2.34965	4.53209	2.20623	0.0421854	0.242472	-3.6786		Cap2	3.8312	1.93988	2.27324	0.0370063	0.212524	-3.79097		Mad2l1bp	0.570803	5.86562	2.35711	0.0313587	0.18021	-3.74553
Il17re	-5.67915	-0.300127	-2.20573	0.0422262	0.242578	-3.87094		Mapre1	-0.351064	8.33828	-2.273	0.0370237	0.212524	-4.65145		Gadd45g	1.66527	2.79849	2.35693	0.0313696	0.18021	-3.50993
Cetn3	-0.507947	6.90036	-2.20492	0.0422934	0.242776	-4.43108		Wdr4	-2.58904	3.95041	-2.27294	0.0370285	0.212524	-3.55392		Nudt15	-3.59864	1.88822	-2.35637	0.0314047	0.180317	-3.74593
S1pr1	0.401042	7.99531	2.20477	0.042305	0.242776	-4.61666		Cct7	-0.272376	8.49569	-2.27287	0.0370335	0.212524	-4.69849		0610010K14Rik	0.468462	6.68638	2.35594	0.0314312	0.180374	-3.96264
Morn1	3.13609	0.361267	2.20348	0.042412	0.243187	-3.7701		Nceh1	3.02683	4.67098	2.27184	0.0371082	0.212734	-3.55367		Ccdc104	-0.988397	4.97095	-2.35458	0.0315163	0.180768	-3.49252
Tia1	0.698298	5.50916	2.20297	0.0424535	0.243187	-4.03947		Usp20	-1.00941	5.11405	-2.27183	0.0371091	0.212734	-3.71523		Fyttd1	-0.519831	6.2364	-2.35425	0.031537	0.180791	-3.81023
4930455F23Rik	2.62037	2.20527	2.20277	0.0424704	0.243187	-3.67629		Stil	-2.89854	1.50813	-2.27112	0.0371611	0.212882	-3.58545		Qrfp	3.3537	1.64743	2.35341	0.0315897	0.180942	-3.717
H2-K2	-0.679245	5.5721	-2.20277	0.0424704	0.243187	-4.09156		Fam117a	-1.87668	3.43618	-2.27094	0.0371739	0.212882	-3.55746		Zc3h15	0.442228	7.04361	2.35321	0.0316022	0.180942	-4.00264
Agpat2	1.07704	3.843	2.20245	0.0424967	0.243187	-3.6885		LOC100642166	-1.91782	2.53379	-2.27036	0.0372164	0.213014	-3.60663		Enox2	-3.63987	2.77089	-2.35298	0.0316169	0.180942	-3.62989
Cxcr4	2.15776	1.58284	2.20228	0.0425104	0.243187	-3.74397		Fyn	0.42636	7.01281	2.26984	0.0372542	0.213118	-4.39745		Dnase1	3.65673	-0.548474	2.35277	0.0316296	0.180942	-3.93763
Zc3h13	0.706034	5.2146	2.20169	0.0425594	0.243238	-3.98123		Klk15	2.87794	-0.348446	2.26932	0.0372922	0.213121	-3.71743		Ncaph2	0.602782	7.25731	2.35128	0.0317232	0.181382	-4.08214
Ap1g2	-0.421675	7.03365	-2.20152	0.0425736	0.243238	-4.46122		Ube2n	0.28938	8.44468	2.2693	0.0372937	0.213121	-4.70191		Necap1	-3.35996	4.3469	-2.35057	0.0317684	0.181545	-3.46234
Gns	1.34169	4.77701	2.20137	0.0425862	0.243238	-3.85301		Romo1	0.426377	6.68786	2.26882	0.0373287	0.213209	-4.19512		Fig4	1.10979	5.1701	2.35021	0.031791	0.18158	-3.56873
Prdx1	0.277645	9.11729	2.20049	0.0426588	0.243525	-5.01529		Pglyrp2	0.454941	7.43205	2.26818	0.0373759	0.213367	-4.35739		Zdhhc3	-0.631167	6.00798	-2.34992	0.0318088	0.181587	-3.76393
2810403A07Rik	-0.438074	7.30523	-2.19884	0.0427959	0.24418	-4.58444		Ric8b	-2.55009	2.25168	-2.2673	0.0374406	0.213625	-3.70899		Tmem8	-2.98319	1.96727	-2.34909	0.0318617	0.181793	-3.77097
BC013529	-0.796886	5.46573	-2.19814	0.0428543	0.244277	-4.02518		Bahd1	-2.77454	0.187231	-2.26637	0.0375088	0.213802	-3.74322		Tmem108	3.22459	-1.35446	2.34874	0.0318834	0.181822	-3.94784
Enc1	-3.63494	-0.373266	-2.1981	0.0428576	0.244277	-3.85752		Rnf19b	1.74487	3.96679	2.26634	0.0375109	0.213802	-3.56063		Hist1h2bk	3.46265	0.0828274	2.34759	0.0319563	0.18208	-3.96587
Ptplad1	0.289811	7.49459	2.19701	0.0429482	0.244666	-4.73019		Ing1	-0.770548	5.39368	-2.26535	0.0375841	0.214108	-3.87514		Aim1l	-2.41903	4.04372	-2.3475	0.0319621	0.18208	-3.46095
Zmat3	2.84862	2.77319	2.19603	0.0430303	0.245005	-3.66975		Mrps28	0.886325	5.00551	2.26486	0.0376199	0.2142	-3.74793		Traf3ip1	3.01874	2.27428	2.34687	0.0320024	0.182215	-3.64623
Insl6	2.77808	3.37663	2.19554	0.0430716	0.245113	-3.67772		Rab4b	0.444454	6.904	2.26433	0.0376594	0.214313	-4.28061		Cbx5	0.757057	5.75408	2.34646	0.0320281	0.182233	-3.69901
Dst	3.9746	1.23141	2.19478	0.0431346	0.2453	-3.84525		Kifc2	4.03288	1.11664	2.2631	0.03775	0.214606	-3.74753		Mzt2	-2.87872	2.36521	-2.34629	0.0320389	0.182233	-3.70617
1700054N08Rik	2.48795	3.03418	2.19461	0.0431494	0.2453	-3.68067		Rlf	-0.928441	5.03147	-2.2631	0.0377502	0.214606	-3.76948		Mut	-1.99992	3.59121	-2.34508	0.0321156	0.182574	-3.484
Mir3064	0.949667	3.88963	2.19376	0.0432206	0.245409	-3.7271		Nek4	3.662	0.944136	2.26217	0.037819	0.214885	-3.87888		Dph3	0.598786	5.91394	2.34476	0.0321365	0.182597	-3.7725
Wrn	1.19569	4.7884	2.19331	0.0432582	0.245409	-3.83354		Rom1	-3.39782	1.55782	-2.26148	0.0378706	0.215067	-3.72508		Ythdc2	-2.71673	3.51777	-2.34336	0.0322256	0.183009	-3.543
Iars	-0.98865	5.8039	-2.19314	0.0432724	0.245409	-4.07024		Gm15645	0.830306	4.20109	2.26046	0.0379462	0.215194	-3.67842		Mtmr6	0.881229	6.15041	2.34309	0.0322429	0.183011	-3.76938
Surf6	-1.31728	4.55486	-2.19296	0.0432876	0.245409	-3.76715		Dtd1	0.722885	5.80931	2.26039	0.0379515	0.215194	-4.00303		Cd79b	4.08415	0.799515	2.34189	0.0323193	0.183233	-3.86228
Rac2	-0.161591	11.7856	-2.19268	0.0433108	0.245409	-5.86341		St6galnac1	3.52636	-0.680573	2.2603	0.0379582	0.215194	-3.77908		1700056E22Rik	-3.43533	0.585218	-2.34176	0.0323278	0.183233	-3.95255
2410066E13Rik	3.90063	0.32992	2.19233	0.0433404	0.245409	-3.82775		Dnmt1	-0.72268	6.87311	-2.26011	0.037972	0.215194	-4.27142		Rps15a	-0.26714	9.27286	-2.34146	0.032347	0.183233	-4.58707
Dock6	3.97815	-1.7469	2.19198	0.0433702	0.245409	-3.93682		Arhgap4	0.361198	8.17626	2.25955	0.0380137	0.215319	-4.6242		Arl6ip5	0.415247	6.87349	2.34143	0.0323491	0.183233	-4.03278
Xab2	-0.457897	7.04032	-2.19195	0.0433727	0.245409	-4.49934		Gm12070	0.210736	9.65206	2.25914	0.0380443	0.215381	-5.06203		Trpc4ap	-0.330269	7.97166	-2.33966	0.0324624	0.183756	-4.30299
Rdbp	0.747282	5.27015	2.19193	0.0433741	0.245409	-3.99893		Heatr5a	1.71211	4.08489	2.25803	0.0381272	0.215695	-3.59365		Fip1l1	0.68316	6.32912	2.33947	0.0324751	0.183756	-3.84766
Klhl21	-0.719241	5.46164	-2.19151	0.0434096	0.245409	-4.00067		Prr11	-1.28324	3.48937	-2.25787	0.0381394	0.215695	-3.57362		Fam83d	4.8781	-0.927451	2.33879	0.0325189	0.183826	-3.98301
Oas1c	3.19641	2.90919	2.19143	0.0434164	0.245409	-3.67019		Park7	0.314865	8.00684	2.25733	0.0381794	0.21581	-4.57928		Itprip	2.09341	4.56905	2.33868	0.0325254	0.183826	-3.46687
Tmem161a	0.978027	5.15667	2.19112	0.0434426	0.245409	-3.9855		Espl1	-2.73835	1.78422	-2.25632	0.038255	0.216026	-3.58332		Ubash3b	0.665818	6.20566	2.33849	0.032538	0.183826	-3.74861
Cbl	-0.628067	6.12332	-2.1909	0.0434608	0.245409	-4.20081		Bzrap1	-3.20165	1.57771	-2.2562	0.0382641	0.216026	-3.71842		Timm10	0.889636	4.73304	2.33671	0.0326528	0.184379	-3.56694
Rel	0.982453	5.8229	2.19005	0.0435332	0.245633	-4.16584		Slc7a4	4.68293	-1.17917	2.25603	0.0382772	0.216026	-3.92661		Plxdc1	2.53524	2.61305	2.33637	0.032675	0.184409	-3.63975
Dnaja1	-0.354813	8.55917	-2.18981	0.0435529	0.245633	-4.93451		Eif1ad	-0.516111	6.67549	-2.25555	0.038313	0.216117	-4.22951		BC002230	1.27643	4.50516	2.33446	0.0327986	0.185011	-3.4951
Ebna1bp2	-0.46857	6.40872	-2.18962	0.0435691	0.245633	-4.31162		Atg12	-0.722701	6.17505	-2.25377	0.0384467	0.216755	-4.02709		Matr3	-0.415151	7.74662	-2.33397	0.0328305	0.185049	-4.22227
Arl6	4.35265	-1.77073	2.18937	0.0435906	0.245633	-3.9333		Tubb2a	1.85283	2.4863	2.25352	0.0384658	0.216755	-3.59184		Suv39h1	1.32923	4.70851	2.33383	0.0328393	0.185049	-3.51902
Tatdn2	-3.46276	-0.580486	-2.18889	0.0436305	0.245731	-3.90766		C330006A16Rik	1.11705	5.33392	2.25195	0.0385842	0.21731	-3.86599		Ankra2	-0.798644	5.1779	-2.33352	0.0328594	0.185067	-3.58234
Stag2	-0.613785	6.88272	-2.18855	0.0436598	0.245769	-4.45171		Mcm2	-0.409825	7.32831	-2.25137	0.0386281	0.217445	-4.4657		Rab11fip4	3.5652	1.13198	2.33301	0.0328926	0.185159	-3.8226
Slfn5	0.616383	5.52976	2.18809	0.0436987	0.245806	-4.1247		Fam60a	-0.561218	6.46988	-2.25094	0.0386606	0.217516	-4.1842		Zbtb1	0.649619	6.57081	2.33273	0.0329112	0.185168	-3.86789
Pafah1b3	1.2145	3.87733	2.18794	0.0437114	0.245806	-3.73633		Frmd6	1.78345	3.30096	2.24814	0.038873	0.218598	-3.58654		Ppip5k2	0.823803	5.84696	2.33234	0.0329362	0.185213	-3.71729
6030458C11Rik	0.816368	6.04212	2.18759	0.0437414	0.245848	-4.22017		Hnrnpa2b1	-0.229224	10.4416	-2.24759	0.0389146	0.218719	-5.27186		Zfp639	3.16167	3.45663	2.33165	0.0329818	0.185374	-3.55003
Slc9a8	-1.1568	5.15505	-2.18716	0.0437777	0.245926	-3.924		Cxx1c	1.77259	3.21076	2.24645	0.0390018	0.219028	-3.59838		Zc3h3	-1.11139	4.62743	-2.33094	0.0330279	0.185537	-3.504
Chchd10	0.780382	4.46986	2.18683	0.0438054	0.245955	-3.9094		Pwp1	-0.788286	6.15748	-2.24635	0.0390097	0.219028	-4.05921		H2-Q8	0.43834	7.27838	2.32976	0.0331053	0.185877	-4.14086
Ahcyl2	-0.789979	5.14938	-2.18458	0.0439968	0.246903	-4.01427		Mrpl37	0.711712	5.87145	2.2459	0.0390439	0.219108	-4.02088		Gdpd1	-5.12271	-0.371452	-2.32868	0.0331758	0.186177	-3.95852
Szt2	2.83859	3.08595	2.18383	0.0440611	0.247055	-3.68394		Ncapd2	-0.779932	5.1353	-2.24527	0.039092	0.219184	-4.00088		Atrx	0.491368	7.45049	2.32808	0.0332152	0.186189	-4.154
Bach2	-2.06835	3.90373	-2.18374	0.0440692	0.247055	-3.67388		Erbb2ip	0.576535	6.38097	2.24519	0.0390977	0.219184	-4.19172		Pofut2	-0.786178	5.23289	-2.32778	0.033235	0.186189	-3.60796
2610029I01Rik	0.883825	5.33189	2.18328	0.0441085	0.247148	-4.02489		Zfp655	-0.579354	6.20314	-2.24472	0.0391336	0.219273	-4.04603		Sh3bgrl3	0.233996	10.8239	2.32747	0.0332554	0.186189	-5.09582
Adrb2	-2.59751	3.47677	-2.1813	0.0442778	0.247969	-3.69458		Cdc42ep3	-0.40548	6.97704	-2.24379	0.0392055	0.219485	-4.30094		Plekhg3	-0.965937	4.76456	-2.32736	0.0332625	0.186189	-3.52497
Commd3	0.369782	7.11529	2.18075	0.0443251	0.248107	-4.55557		Pitpnm2	1.23956	4.58755	2.2437	0.0392118	0.219485	-3.79115		Baz1a	1.19178	4.86596	2.3273	0.0332668	0.186189	-3.53756
Vps4b	-0.405256	7.39423	-2.17955	0.0444282	0.248432	-4.66696		1700029F09Rik	-0.776347	5.24952	-2.24322	0.0392491	0.219581	-3.93547		Prg4	3.90301	-0.660903	2.32709	0.0332804	0.186189	-4.03775
Sae1	0.531229	7.20542	2.17954	0.0444289	0.248432	-4.53829		Mapk1ip1l	-0.574733	6.80646	-2.24263	0.0392943	0.219722	-4.28637		Fam117b	3.56399	2.65975	2.32638	0.0333273	0.186356	-3.79121
Ptma	-0.202011	10.117	-2.17928	0.0444514	0.248432	-5.31572		Pfkm	1.57267	4.0859	2.24055	0.039454	0.220502	-3.59834		Polk	1.64132	4.28056	2.32484	0.0334288	0.186684	-3.47997
Bbs9	-2.55272	3.82883	-2.17883	0.0444906	0.248524	-3.68091		Bub1b	-0.955935	3.36925	-2.23878	0.0395915	0.221157	-3.94913		Pex1	-2.54467	2.47078	-2.32482	0.03343	0.186684	-3.62655
Tmem29	1.26251	3.87674	2.17839	0.0445287	0.248609	-3.75883		Ubxn7	0.823786	5.34578	2.23811	0.0396428	0.221172	-3.84635		Mmaa	-1.9357	2.89735	-2.32471	0.0334371	0.186684	-3.5849
Tkt	0.576714	6.77987	2.17745	0.0446098	0.248845	-4.41665		Mapre2	0.395905	7.53581	2.23776	0.0396702	0.221172	-4.53127		Zwilch	5.36275	0.043992	2.32309	0.0335445	0.187111	-3.98054
Jun	-4.07829	-0.617919	-2.17701	0.0446472	0.248845	-3.94264		Tbcd	-0.870927	5.54296	-2.23775	0.039671	0.221172	-3.90953		Rpl37	-0.289856	9.09529	-2.32304	0.033548	0.187111	-4.58232
Ap2a2	-0.601288	6.13728	-2.17673	0.0446721	0.248845	-4.25804		Icam4	3.83938	-0.328003	2.23769	0.0396752	0.221172	-3.8325		Rnf138	0.455537	6.91819	2.32263	0.0335754	0.187168	-4.02012
Fabp5	1.25073	3.83343	2.17668	0.0446762	0.248845	-3.70204		Grap2	-2.40731	3.71687	-2.23717	0.0397159	0.221286	-3.60313		Espn	-3.1584	1.00838	-2.32237	0.0335925	0.187168	-3.78712
Fam105b	-2.71812	3.23239	-2.17648	0.0446931	0.248845	-3.6988		Sf3b1	-0.22872	9.27482	-2.23649	0.0397689	0.221468	-4.93334		Ppp1r11	-0.498713	6.60543	-2.32202	0.0336154	0.1872	-3.97414
Usp5	0.490644	6.43704	2.17631	0.0447078	0.248845	-4.3858		Rassf1	-0.86672	5.48898	-2.23532	0.0398599	0.221862	-3.985		Med24	0.968743	5.29225	2.32096	0.0336862	0.187437	-3.64669
Rpp40	-1.7251	3.13229	-2.17574	0.0447577	0.248996	-3.68529		Erlin2	1.14581	5.19205	2.2347	0.0399083	0.221913	-3.83746		Foxred2	4.97007	-1.45649	2.32082	0.0336956	0.187437	-4.0064
Snap47	0.750838	6.14384	2.17532	0.0447943	0.249022	-4.19963		Atp5l	-0.3548	8.09524	-2.23442	0.0399297	0.221913	-4.65021		Sugp1	-0.663853	5.89414	-2.32061	0.0337095	0.187437	-3.8272
Ubr7	0.68762	5.69157	2.17516	0.0448081	0.249022	-4.17376		Bcor	0.762422	5.22081	2.23435	0.0399349	0.221913	-3.85306		Txndc17	0.417374	6.90696	2.31965	0.0337735	0.18755	-4.01303
Tmem216	1.81334	2.85967	2.17446	0.044869	0.249234	-3.68605		Fam111a	-0.919344	6.00304	-2.23379	0.0399786	0.221913	-4.05277		Emg1	-0.388391	7.09264	-2.31954	0.0337808	0.18755	-4.10368
Rpn2	-0.357976	8.36713	-2.17225	0.0450611	0.250174	-4.89935		Mast4	3.84879	-0.662446	2.2335	0.0400015	0.221913	-3.9399		Rnf214	-0.839286	5.12346	-2.31953	0.0337814	0.18755	-3.60881
Cstb	0.415338	6.71913	2.17178	0.0451024	0.250276	-4.47325		Pik3cb	3.25908	1.17961	2.23345	0.0400056	0.221913	-3.82185		Rab4a	-1.36715	3.53627	-2.31902	0.0338155	0.187561	-3.52166
Abca2	-1.02179	6.1131	-2.17148	0.0451281	0.250291	-4.23646		Ndst1	3.03886	2.57643	2.23338	0.0400114	0.221913	-3.65838		Rpl17	-0.307204	9.06289	-2.31899	0.0338177	0.187561	-4.5931
Ang	3.48157	-0.176878	2.17004	0.045254	0.250862	-3.869		Klhdc3	0.5488	6.62074	2.23309	0.0400335	0.221923	-4.27073		Ccdc28b	-3.49679	2.33514	-2.31852	0.0338491	0.18764	-3.8724
Tdrd7	3.37029	1.88572	2.16973	0.0452811	0.250885	-3.74359		Fam108c	1.77212	3.41529	2.23142	0.0401641	0.222445	-3.62153		Nup35	0.749682	5.60502	2.31712	0.033943	0.18802	-3.73631
Ttc39b	0.746586	6.28043	2.16876	0.0453667	0.251232	-4.31861		Atp11b	-0.539591	7.56422	-2.23137	0.0401685	0.222445	-4.55308		Mrvi1	-4.30721	-1.57171	-2.31659	0.033978	0.18802	-4.02902
Gpr132	-0.509472	6.55992	-2.16764	0.0454651	0.251637	-4.41209		Gsg2	-1.03611	4.97845	-2.23072	0.0402194	0.222504	-3.76217		AI987944	-0.750279	5.06398	-2.3165	0.0339844	0.18802	-3.58556
Mrps21	0.346173	7.05217	2.1674	0.045486	0.251637	-4.5404		Sap130	0.597514	6.28055	2.23071	0.0402199	0.222504	-4.158		Hlcs	-1.40252	4.11653	-2.31647	0.0339866	0.18802	-3.49244
Gm9320	-0.371845	7.28166	-2.16647	0.0455673	0.251959	-4.63386		Ralgps2	1.64791	4.3506	2.22999	0.0402771	0.222707	-3.61612		Ccne1	2.52417	3.43119	2.31617	0.0340062	0.188033	-3.58436
Isy1	-0.527879	6.49388	-2.16474	0.0457204	0.252618	-4.37175		Parp14	0.856551	5.42464	2.22921	0.0403378	0.22293	-3.86465		Cry2	-2.79433	2.44899	-2.31585	0.0340279	0.188058	-3.69069
2610301B20Rik	3.59369	1.87919	2.16411	0.0457761	0.252618	-3.72266		Tfb2m	1.42148	4.46947	2.22847	0.0403963	0.22314	-3.67987		A730098P11Rik	-0.494826	7.16698	-2.31531	0.0340644	0.188164	-4.08597
Adamtsl4	4.84411	-0.145733	2.16403	0.0457836	0.252618	-3.92329		Sdr39u1	0.547039	6.12625	2.22743	0.0404784	0.223481	-4.10641		Smcr7	2.20428	3.32212	2.31495	0.0340886	0.188203	-3.60252
Eif2c2	1.81427	4.69755	2.16393	0.0457921	0.252618	-3.80743		Tnip1	0.532917	6.59006	2.22627	0.0405702	0.223875	-4.25642		Fabp5	1.28945	3.83343	2.31346	0.0341887	0.18866	-3.50329
Usp33	1.20033	5.62689	2.16366	0.0458158	0.252618	-4.17743		Gm15760	4.27584	-1.50836	2.22527	0.040649	0.224196	-3.96099		Dtx3l	-0.50043	7.25294	-2.31306	0.0342161	0.188716	-4.17407
Ccr10	-4.30744	-0.87944	-2.16354	0.0458263	0.252618	-3.95766		E2f8	-1.62434	2.091	-2.22485	0.0406831	0.224271	-3.63525		Doc2a	2.8288	2.18077	2.31233	0.0342652	0.188801	-3.71578
1110067D22Rik	3.38232	1.83343	2.16329	0.0458485	0.252618	-3.72735		Trp53bp1	0.764719	5.68578	2.22418	0.0407362	0.224418	-4.0397		Alg11	-0.740938	5.17767	-2.31214	0.0342783	0.188801	-3.65755
Msh5	3.75559	-0.44162	2.16101	0.0460509	0.253529	-3.96052		Tiam1	2.01395	2.22466	2.22397	0.0407525	0.224418	-3.62949		H2-Eb1	3.4237	3.53368	2.31206	0.0342835	0.188801	-3.55864
Rnase4	1.0137	3.46924	2.16091	0.0460603	0.253529	-4.01182		Ercc5	2.83161	2.78293	2.22373	0.0407714	0.224418	-3.62757		Zbtb43	-1.05212	4.61734	-2.31083	0.0343669	0.189165	-3.56942
Kifap3	3.5481	1.32983	2.16045	0.0461011	0.253626	-3.79159		Klhl11	-2.63273	0.510047	-2.2227	0.0408535	0.224649	-3.75391		Dennd4c	-0.853382	5.376	-2.30973	0.0344417	0.189481	-3.66001
Myl6b	2.77196	2.16094	2.15977	0.0461618	0.253719	-3.75941		8430410A17Rik	0.917016	5.38079	2.22269	0.0408546	0.224649	-3.96347		Kcna3	-0.761216	5.49088	-2.30916	0.0344805	0.189599	-3.73217
Cenpl	1.62547	4.3642	2.15974	0.0461645	0.253719	-3.71322		Zpbp2	-2.64386	1.97264	-2.22146	0.0409526	0.225074	-3.72327		Ikzf2	0.615467	6.59203	2.30743	0.0345978	0.190149	-3.83864
Alg11	-0.712855	5.17767	-2.15927	0.0462065	0.253822	-4.06164		Prr5	-4.45201	-1.72219	-2.2209	0.0409972	0.225206	-3.93858		Gpr65	-0.622761	6.38092	-2.30714	0.0346182	0.190165	-4.01768
Senp6	0.88719	5.12502	2.15874	0.0462535	0.253952	-4.01668		Ap1s2	0.921817	4.40851	2.21972	0.0410918	0.225514	-3.79302		Gcnt7	3.79236	-0.469325	2.30586	0.0347056	0.190549	-4.01139
Ado	-0.848019	6.16721	-2.15803	0.0463175	0.253964	-4.3044		Dgka	-0.225078	8.80985	-2.21968	0.0410946	0.225514	-4.92569		Tprn	-1.17566	3.91477	-2.30503	0.0347626	0.190766	-3.50656
Tmem154	-0.459134	7.75269	-2.15799	0.0463207	0.253964	-4.83469		Ids	-2.69091	2.32348	-2.21927	0.0411277	0.225582	-3.70639		Tceb1	0.521025	6.54982	2.30241	0.0349422	0.191655	-3.98256
Nbn	0.782098	5.33695	2.15794	0.0463254	0.253964	-4.0783		Styx	-0.882398	5.3878	-2.2189	0.0411576	0.225633	-3.89313		Dnmt3b	-1.0225	4.33909	-2.302	0.0349704	0.191714	-3.55353
Zfp330	0.638828	6.07794	2.15735	0.0463782	0.254112	-4.28693		Gle1	-0.68304	6.04201	-2.2165	0.0413504	0.226508	-4.12884		Snord35b	1.82189	2.01445	2.30168	0.0349927	0.19174	-3.66929
St8sia1	3.22964	1.5538	2.1571	0.0464006	0.254112	-3.8437		Spnb2	0.512268	6.86135	2.21628	0.0413679	0.226508	-4.37735		Rpn1	0.324816	8.16903	2.30005	0.0351052	0.19203	-4.39696
Itga2b	4.63242	-1.24404	2.15685	0.0464224	0.254112	-3.95357		Slc39a13	-1.04255	3.97442	-2.21614	0.0413796	0.226508	-3.6807		Napepld	4.26207	-0.603951	2.30002	0.0351072	0.19203	-3.96008
Tmem159	-3.84215	1.56	-2.15593	0.046505	0.254437	-3.79194		Cuta	-0.475747	6.83124	-2.21563	0.0414206	0.22662	-4.3225		Gnb1	0.297088	8.33248	2.29984	0.0351195	0.19203	-4.46572
Rps27a	-0.251804	10.2184	-2.15506	0.0465832	0.254737	-5.43165		Rasa4	-4.73134	-0.996259	-2.21537	0.0414416	0.226621	-3.94311		Taf12	0.52065	6.49652	2.29974	0.035127	0.19203	-4.0023
Rpl9	-0.189992	9.92818	-2.15419	0.0466616	0.255038	-5.35235		Abcd3	2.77605	3.24815	2.21444	0.041517	0.226919	-3.65005		Sipa1l2	3.67439	1.22474	2.29925	0.0351604	0.19203	-3.84048
Acvr1b	-3.31254	0.150245	-2.15299	0.0467699	0.25549	-3.88951		Fbxo6	1.01882	5.24538	2.213	0.0416332	0.227441	-3.89195		Manba	-1.16846	4.83167	-2.29916	0.0351667	0.19203	-3.63367
[truncated: 8,917 more rows]
