# Supplementary material for: Longitudinal analysis of invariant natural killer T cell activation reveals a cMAF-associated transcriptional state of NKT10 cells
Source: eLife. 2022 Dec 2;11:e76586. doi: 10.7554/eLife.76586 (PMC9831610; doi:10.7554/eLife.76586)
Supplement: Supplementary file 8. [file elife-76586-supp8.xlsx]

## Sheet: Sheet1
Gene ID	-LogFC(aGC_Pretreated_Versus_Control)	Average_Expression	t	P.Value	adj.P.Val	B
Cxcr5	5.45562	7.39582	-26.3612	4.1258e-09	8.46161e-06	11.6263
Il21	4.34255	9.03586	-23.9254	8.93457e-09	8.99971e-06	10.9481
Cebpa	4.16204	7.39863	-22.0951	1.68241e-08	1.09547e-05	10.3726
Lag3	3.77392	6.98898	-27.552	2.89965e-09	6.60765e-06	11.9261
Cd200	3.58636	9.30252	-30.2828	1.36249e-09	4.97865e-06	12.5462
Sostdc1	3.4959	6.57558	-17.8289	9.19127e-08	2.20354e-05	8.75353
2310050P20Rik	3.39057	7.59123	-11.9892	2.02338e-06	0.000117891	5.60347
Vdr	3.3234	7.73205	-25.0622	6.17309e-09	8.99971e-06	11.2761
Slc9b2	3.29567	6.63819	-19.6106	4.33183e-08	1.48069e-05	9.48314
Il10	3.22536	7.20287	-15.4861	2.77942e-07	4.22246e-05	7.65045
Lancl3	3.22161	4.96292	-24.0273	8.63753e-09	8.99971e-06	10.9783
B4galnt4	3.22039	6.27422	-28.0926	2.48284e-09	6.36506e-06	12.056
Tubb2b	3.2053	5.531	-15.2897	3.07117e-07	4.43568e-05	7.54942
Angptl2	3.12311	5.50823	-21.7329	1.91845e-08	1.09547e-05	10.2512
Itga4	3.1084	8.71706	-21.4997	2.08999e-08	1.09547e-05	10.1716
Gpm6b	3.07671	6.24739	-33.579	5.95887e-10	4.97865e-06	13.1878
Klk1b27	3.07519	6.11213	-34.0846	5.28661e-10	4.97865e-06	13.2773
5330403D14Rik	3.02038	8.61841	-14.9	3.75773e-07	4.847e-05	7.34453
Lratd1	2.93952	5.912	-21.82	1.85844e-08	1.09547e-05	10.2807
D330040H18Rik	2.88881	4.8135	-14.953	3.65488e-07	4.84016e-05	7.37276
Plekho1	2.88025	8.5203	-21.2517	2.29151e-08	1.09547e-05	10.0857
S1pr5	2.87958	6.14511	-10.61	5.13926e-06	0.000202306	4.62039
Coro2b	2.81004	6.41576	-18.9875	5.59191e-08	1.66948e-05	9.23754
Alcam	2.79294	6.36783	-30.1416	1.41441e-09	4.97865e-06	12.5162
Tox2	2.74341	7.17457	-26.003	4.60147e-09	8.57923e-06	11.5322
Itgb8	2.71683	4.09305	-9.53467	1.14843e-05	0.000341846	3.76448
Mki67	2.71418	10.136	-15.7346	2.45379e-07	3.90115e-05	7.77624
Pou2af1	2.70184	8.74151	-22.3494	1.53619e-08	1.08641e-05	10.4563
BB163080	2.66572	4.78522	-10.9325	4.09453e-06	0.000179433	4.86107
Pbk	2.65473	7.36944	-16.4432	1.73699e-07	3.39275e-05	8.123
Aurkb	2.61884	6.81034	-10.0578	7.69463e-06	0.000263455	4.19154
Myb	2.61576	9.8272	-24.029	8.63247e-09	8.99971e-06	10.9789
H2-Ob	2.61081	7.33673	-16.9824	1.34801e-07	2.91014e-05	8.37549
Ccnb2	2.58805	7.70901	-13.9106	6.41749e-07	5.96479e-05	6.79674
Sccpdh	2.57192	6.52984	-20.3877	3.18448e-08	1.27839e-05	9.77616
Ccna2	2.56677	8.25401	-14.6983	4.17944e-07	5.01938e-05	7.23614
Nuf2	2.56646	7.08151	-13.2377	9.42737e-07	7.37962e-05	6.39963
Zdhhc2	2.56537	7.06672	-20.8292	2.68722e-08	1.16939e-05	9.93638
Nrbp2	2.55234	5.18375	-19.2101	5.09981e-08	1.60911e-05	9.3264
Pdcd1	2.53855	10.106	-13.4398	8.38326e-07	7.09026e-05	6.52112
Rnf216	2.51633	7.10358	-15.3548	2.97094e-07	4.42587e-05	7.58303
Rad54b	2.47884	5.47354	-11.507	2.77115e-06	0.000143149	5.27306
Anxa3	2.46329	6.07331	-10.9151	4.14465e-06	0.00018029	4.8482
E2f2	2.44777	6.92372	-17.0273	1.32034e-07	2.88073e-05	8.39607
Cenpe	2.40158	6.75468	-18.1051	8.14215e-08	2.03643e-05	8.87228
Ncapg	2.40122	8.05977	-12.3967	1.56488e-06	9.93625e-05	5.87238
Actn1	2.39464	7.02025	-21.2901	2.25896e-08	1.09547e-05	10.0991
Depdc1a	2.39395	4.41229	-17.5796	1.02698e-07	2.34026e-05	8.64443
Tmprss13	2.35638	5.16087	-15.6372	2.57594e-07	4.06385e-05	7.72724
Spock2	2.35199	6.47723	-29.2912	1.77809e-09	5.20955e-06	12.3312
Cdk1	2.34809	8.63687	-18.7098	6.28241e-08	1.78953e-05	9.12483
Mcub	2.32696	6.62784	-14.5359	4.55747e-07	5.25181e-05	7.14773
Rad51	2.32285	6.7936	-23.3605	1.08061e-08	8.99971e-06	10.777
AU021001	2.32072	5.99608	-9.9691	8.22457e-06	0.000276521	4.12062
Mnd1	2.29651	5.5895	-25.0461	6.20479e-09	8.99971e-06	11.2716
D15Wsu126e	2.29076	7.50784	-6.40267	0.000201784	0.0024421	0.680062
Syne3	2.28753	7.09503	-21.489	2.09823e-08	1.09547e-05	10.1679
F2rl1	2.28451	8.921	-21.4406	2.13616e-08	1.09547e-05	10.1512
5830456J23Rik	2.27509	5.77401	-19.0763	5.3895e-08	1.64975e-05	9.27314
Shcbp1	2.27106	7.58012	-14.3161	5.13194e-07	5.43034e-05	7.02625
4833423F13Rik	2.26293	7.928	-9.40512	1.27185e-05	0.000364306	3.6554
Cass4	2.26136	6.56568	-21.2991	2.25136e-08	1.09547e-05	10.1023
Esco2	2.25949	5.05426	-12.9823	1.09606e-06	8.14204e-05	6.24331
Ppfibp2	2.25686	5.27106	-18.5418	6.74605e-08	1.82046e-05	9.05569
Ccnb1	2.25642	6.85508	-12.6944	1.30335e-06	9.03161e-05	6.06313
Car1	2.25061	7.27136	-4.79789	0.00133035	0.0093631	-1.35262
A130001G05Rik	2.24547	8.24027	-9.56033	1.1256e-05	0.000337993	3.78593
Nrp1	2.24501	8.85659	-14.5112	4.61847e-07	5.25181e-05	7.13414
Spp1	2.23653	4.23315	-13.4259	8.45055e-07	7.10297e-05	6.51285
Cdc6	2.23572	7.14233	-10.2993	6.43449e-06	0.000233289	4.38178
Birc5	2.23385	9.62663	-12.6288	1.35644e-06	9.2423e-05	6.02153
Id3	2.23262	8.7132	-11.439	2.89939e-06	0.000146186	5.22541
Syt11	2.22528	7.22027	-16.3885	1.78307e-07	3.41456e-05	8.09682
Pclaf	2.22045	9.0714	-17.9133	8.85552e-08	2.16212e-05	8.79003
E2f7	2.21784	5.37846	-11.7959	2.29199e-06	0.000127397	5.47268
Gzma	2.20571	10.8249	-7.65624	5.7407e-05	0.00102597	2.03675
Cd83	2.20532	10.1269	-20.9954	2.52308e-08	1.12491e-05	9.99559
Kif18b	2.19476	5.83559	-17.1607	1.24169e-07	2.76802e-05	8.45694
Rasgef1a	2.18231	7.00583	-14.4032	4.89517e-07	5.34072e-05	7.07462
Casp1	2.17653	9.87716	-23.3162	1.09704e-08	8.99971e-06	10.7633
Stil	2.1477	5.64264	-15.1113	3.36637e-07	4.66493e-05	7.45633
Gm19937	2.14544	5.70877	-15.8171	2.35526e-07	3.77376e-05	7.81753
Hmgn3	2.12985	6.91278	-18.578	6.64311e-08	1.81658e-05	9.07063
1700097N02Rik	2.12841	7.04092	-12.722	1.28167e-06	9.03161e-05	6.0806
Clspn	2.12304	7.17583	-14.9009	3.75601e-07	4.847e-05	7.34499
Ncapg2	2.11072	8.97257	-13.9434	6.30087e-07	5.92773e-05	6.81561
Cdkn3	2.10891	6.79688	-7.79208	5.05833e-05	0.000937986	2.17312
Tgfb3	2.10833	5.49834	-15.8531	2.31371e-07	3.73636e-05	7.83545
Cenph	2.10649	7.47665	-11.4974	2.78888e-06	0.000143149	5.26634
Cep55	2.10618	6.97618	-23.0233	1.2131e-08	9.56903e-06	10.6721
Cdca8	2.10123	7.92962	-23.3859	1.07129e-08	8.99971e-06	10.7848
Paqr4	2.0841	7.03407	-11.2609	3.26852e-06	0.000155893	5.09908
Kntc1	2.06979	7.24304	-14.0137	6.05945e-07	5.83377e-05	6.85578
Cdc25b	2.06787	10.5415	-14.0279	6.01189e-07	5.83377e-05	6.86388
Ube2c	2.05688	8.86426	-11.5204	2.74644e-06	0.000142612	5.28248
Slfn3	2.05393	5.41404	-9.5866	1.10275e-05	0.000335056	3.80783
C78115	2.0499	6.73447	-9.05406	1.68745e-05	0.000441427	3.35282
Prc1	2.04629	8.38411	-11.8508	2.2119e-06	0.000124969	5.51002
Knl1	2.04398	6.30515	-10.9804	3.96073e-06	0.000175619	4.89621
Arhgap11a	2.03278	8.64509	-12.5938	1.38578e-06	9.28702e-05	5.99922
D5Ertd683e	2.02723	4.98318	-11.0184	3.85814e-06	0.000172389	4.92395
Dclk1	2.00176	4.60372	-7.59769	6.06582e-05	0.00105696	1.97737
Kif11	1.99642	6.86795	-13.3806	8.67505e-07	7.11816e-05	6.48573
Klra5	1.98536	9.03853	-7.73914	5.31293e-05	0.000972015	2.12021
Cdca5	1.98146	6.83088	-13.0148	1.07512e-06	8.04731e-05	6.26334
A330068G13Rik	1.97257	5.18201	-17.1331	1.25752e-07	2.77317e-05	8.44439
Sgo2a	1.97125	6.49704	-11.4682	2.84355e-06	0.000144869	5.2459
Spc24	1.95716	7.46594	-14.8317	3.89486e-07	4.99249e-05	7.30803
Ncaph	1.9548	7.13834	-11.4977	2.78827e-06	0.000143149	5.26657
Ntrk3	1.9374	6.476	-17.676	9.83682e-08	2.28142e-05	8.68683
Myadm	1.93304	6.47674	-11.7619	2.3433e-06	0.00012919	5.44942
Zfand4	1.92571	5.22644	-7.05502	0.00010273	0.0015312	1.40903
Bub1	1.91121	5.37158	-9.77621	9.52365e-06	0.000301887	3.9643
Dnah8	1.90848	5.96144	-16.5733	1.6328e-07	3.31556e-05	8.18476
Klra7	1.90266	6.67922	-11.2957	3.19251e-06	0.000153447	5.1239
Gprasp2	1.89694	5.25611	-15.4175	2.87762e-07	4.33949e-05	7.61533
Ampd3	1.88571	6.53744	-14.6504	4.28726e-07	5.07102e-05	7.21015
Rgs16	1.8729	6.4934	-16.1843	1.96738e-07	3.52992e-05	7.99834
Cemip2	1.87123	7.71681	-20.2342	3.38102e-08	1.30833e-05	9.71939
Gpsm2	1.87017	6.23403	-12.0255	1.97703e-06	0.000116221	5.62776
9630013D21Rik	1.86946	8.68193	-12.5198	1.45025e-06	9.5115e-05	5.9518
Pole	1.86625	7.75244	-15.6149	2.60488e-07	4.07813e-05	7.71597
Ckap2	1.86619	6.51047	-9.32685	1.35355e-05	0.000378201	3.58883
E2f8	1.86289	6.19986	-12.1082	1.87562e-06	0.000113472	5.68293
Gal	1.862	6.12623	-8.19365	3.51461e-05	0.000737026	2.5651
Vsig10	1.85998	6.11898	-9.47762	1.20105e-05	0.00035039	3.71661
Kif22	1.85112	7.46318	-12.368	1.59304e-06	0.000100528	5.85375
Rrm2	1.84669	8.4965	-16.5053	1.6864e-07	3.32562e-05	8.15252
6030439D06Rik	1.83102	8.10334	-8.80103	2.08085e-05	0.000513551	3.12818
Gm4814	1.82949	6.80014	-17.6838	9.80252e-08	2.28142e-05	8.69026
Cd244a	1.82727	6.74438	-9.55102	1.13382e-05	0.000339819	3.77815
Ska3	1.82266	5.91897	-9.67393	1.03043e-05	0.00032215	3.88025
Ect2	1.81776	8.03454	-12.6473	1.34127e-06	9.16936e-05	6.03325
Slc22a15	1.81474	8.50765	-16.9166	1.38978e-07	2.96905e-05	8.34519
Asns	1.80755	5.36636	-12.0249	1.97772e-06	0.000116221	5.6274
Kif20a	1.80609	7.47381	-13.7155	7.16149e-07	6.41376e-05	6.68376
Padi4	1.79446	5.13214	-7.28849	8.15946e-05	0.00128892	1.6576
Uhrf1	1.78966	8.44521	-15.4879	2.77685e-07	4.22246e-05	7.65138
Mapk11	1.7888	7.02186	-11.9996	2.00993e-06	0.000117441	5.61046
Dsp	1.78382	4.00312	-18.9769	5.61675e-08	1.66948e-05	9.23326
Fam43a	1.7809	5.00805	-6.06059	0.000293248	0.00318719	0.27639
Melk	1.77483	6.85544	-9.49336	1.18627e-05	0.000347134	3.72985
Pex11a	1.77249	7.69955	-16.0458	2.10464e-07	3.53804e-05	7.93067
Jchain	1.77184	9.00646	-13.8211	6.7475e-07	6.17601e-05	6.74512
Tnfsf8	1.77159	6.34607	-13.1301	1.00419e-06	7.6561e-05	6.33417
B3gnt5	1.76537	5.3475	-14.5028	4.63934e-07	5.25181e-05	7.12953
Endod1	1.76508	9.23095	-21.7013	1.94071e-08	1.09547e-05	10.2405
Sh3rf1	1.7376	6.58016	-20.0679	3.60935e-08	1.35101e-05	9.6573
Gstt3	1.73414	4.83411	-20.3423	3.24133e-08	1.27839e-05	9.7594
Tk1	1.73374	8.76791	-9.52312	1.15887e-05	0.000342978	3.75481
Hemgn	1.72796	5.15642	-5.75312	0.000415504	0.00406564	-0.0997354
Cdc20	1.72294	7.11138	-18.3579	7.29822e-08	1.92053e-05	8.97911
Plpp2	1.7185	7.0004	-14.3616	5.00662e-07	5.37596e-05	7.05158
Ces2g	1.71702	4.68998	-4.86056	0.00122771	0.00887214	-1.26641
Zfp760	1.70438	5.60475	-6.97444	0.000111379	0.00162582	1.32176
Usp6nl	1.70397	7.91949	-21.1012	2.4244e-08	1.10493e-05	10.033
Serpina9	1.69973	4.55681	-10.4369	5.82066e-06	0.000219038	4.48828
Fcrl1	1.69798	5.60616	-12.1978	1.77224e-06	0.000108823	5.74228
Eno2	1.69786	7.19548	-11.3644	3.04814e-06	0.000151001	5.17269
Zwilch	1.69639	7.4529	-11.3358	3.10722e-06	0.000151728	5.15246
Rad51ap1	1.69298	5.56719	-11.2139	3.37431e-06	0.000159089	5.06547
2310001H17Rik	1.69134	6.34495	-17.8169	9.24005e-08	2.20354e-05	8.74833
Asf1b	1.68884	9.66136	-14.9757	3.61186e-07	4.84016e-05	7.38481
Ckap2l	1.68855	7.42114	-16.089	2.06074e-07	3.52992e-05	7.95183
9430037O13Rik	1.6844	6.47265	-9.56564	1.12094e-05	0.000337993	3.79036
9430087J23Rik	1.68408	7.24468	-6.84527	0.000126974	0.00177634	1.18028
Lockd	1.68085	4.30336	-11.6929	2.45138e-06	0.000133004	5.40204
Hmmr	1.68059	5.71347	-13.0562	1.049e-06	7.90957e-05	6.28886
Ica1l	1.68023	4.91354	-7.43275	7.09685e-05	0.00116942	1.80811
Casp4	1.67997	9.91958	-21.1991	2.33703e-08	1.09547e-05	10.0673
Lig1	1.67985	9.01112	-18.2419	7.67251e-08	1.94266e-05	8.93032
Tox	1.67879	8.00409	-22.6421	1.38527e-08	1.03371e-05	10.5511
Ankrd29	1.67731	4.4823	-10.9419	4.06789e-06	0.000178648	4.86797
Kcnn4	1.67647	9.89546	-18.5846	6.62444e-08	1.81658e-05	9.07337
Kif4	1.6727	5.43544	-11.6745	2.48099e-06	0.000134255	5.38942
Mapk12	1.66596	4.15292	-11.2238	3.35163e-06	0.000158721	5.07259
Cdc42ep4	1.66546	5.99739	-9.36991	1.3079e-05	0.000371006	3.62552
Abcc3	1.65706	6.41784	-8.80498	2.07398e-05	0.000512836	3.13172
Vim	1.65195	11.154	-12.9776	1.09911e-06	8.14204e-05	6.24041
Spag5	1.65081	6.18225	-12.0769	1.91322e-06	0.000114393	5.66214
Aspm	1.64635	5.11122	-15.5187	2.73399e-07	4.21589e-05	7.66711
Stmn1	1.64505	10.9546	-19.3419	4.8314e-08	1.58761e-05	9.37842
Cpne7	1.62956	6.63919	-14.3385	5.06996e-07	5.41562e-05	7.0387
Klrg1	1.62914	9.11967	-9.35936	1.31893e-05	0.000371565	3.61654
Car5b	1.61805	4.70221	-13.0844	1.03163e-06	7.81391e-05	6.3062
Cldn10	1.61381	7.45238	-9.2662	1.42088e-05	0.000390104	3.5369
Ptpn13	1.61375	6.59057	-12.6971	1.30117e-06	9.03161e-05	6.06487
Lrr1	1.61178	4.54822	-16.833	1.445e-07	3.02403e-05	8.30647
Cela1	1.61175	7.57222	-14.0162	6.05109e-07	5.83377e-05	6.8572
Dennd2d	1.61175	10.4565	-14.5733	4.46731e-07	5.20569e-05	7.16814
Car2	1.60991	6.92888	-3.84178	0.00486378	0.0236211	-2.73618
Slc15a1	1.60536	5.25902	-11.3257	3.1284e-06	0.0001524	5.1453
Grhl1	1.60196	8.01435	-21.1841	2.35021e-08	1.09547e-05	10.0621
Ccnf	1.60193	4.93714	-11.0704	3.72228e-06	0.000169177	4.96183
Zc3h12d	1.59191	8.02391	-21.9824	1.75216e-08	1.09547e-05	10.3351
A430093F15Rik	1.5915	10.0187	-19.1134	5.30735e-08	1.64922e-05	9.28795
S100a9	1.58972	6.77571	-4.16011	0.00311209	0.0172475	-2.26173
Cpeb1	1.58919	3.96436	-9.08695	1.6427e-05	0.000435835	3.38161
Izumo1r	1.585	11.5333	-14.3781	4.9621e-07	5.35619e-05	7.06072
St3gal1	1.58174	7.21578	-11.1748	3.46537e-06	0.000162263	5.03736
Slamf6	1.58168	10.1826	-20.02	3.6784e-08	1.35101e-05	9.63927
Sgo1	1.5752	6.67569	-13.3208	8.98107e-07	7.1343e-05	6.44986
Mpp2	1.57475	6.60031	-20.6744	2.85092e-08	1.16939e-05	9.8807
Marveld2	1.57088	7.76926	-11.2471	3.29915e-06	0.000156926	5.08924
S100a8	1.56604	5.76142	-4.58147	0.00176317	0.0114869	-1.65466
Fam221a	1.5648	7.12388	-11.0465	3.78391e-06	0.000169442	4.94448
D5Ertd255e	1.56258	8.29862	-6.91667	0.000118076	0.00169819	1.25873
Trim59	1.56008	7.79942	-13.8649	6.58347e-07	6.082e-05	6.77046
Lrrn3	1.55822	5.14823	-6.59147	0.000165151	0.00212623	0.896415
Ldlrad3	1.55362	4.97077	-5.63694	0.000475495	0.00444684	-0.245225
Nav2	1.54953	6.00971	-16.2651	1.89199e-07	3.48999e-05	8.03749
A730059M13Rik	1.54714	4.90699	-8.23249	3.39559e-05	0.000719422	2.60216
Arnt2	1.5449	5.3275	-12.716	1.28631e-06	9.03161e-05	6.07684
Aff3	1.5434	8.2352	-13.4163	8.49792e-07	7.11363e-05	6.50707
Ncr1	1.53977	4.78272	-8.98144	1.79115e-05	0.000462071	3.28892
Ak7	1.53878	7.4518	-12.4712	1.49434e-06	9.63756e-05	5.92054
Grtp1	1.53867	5.63674	-14.7379	4.09256e-07	5.01938e-05	7.25757
B930095G15Rik	1.5362	5.65988	-11.5084	2.76851e-06	0.000143149	5.27406
Gprin3	1.52727	5.52367	-12.1732	1.80002e-06	0.000110199	5.726
Arhgap21	1.52481	5.13783	-13.459	8.29081e-07	7.09026e-05	6.53259
Smim3	1.51905	9.10118	-14.4943	4.66054e-07	5.25181e-05	7.12487
Hells	1.5176	7.15963	-9.60929	1.08343e-05	0.000330657	3.8267
Six5	1.51362	4.84433	-7.83985	4.84015e-05	0.000912377	2.22061
Slc43a3	1.50594	8.223	-16.0952	2.05451e-07	3.52992e-05	7.95487
Myo5a	1.50004	6.30034	-13.7256	7.12052e-07	6.40503e-05	6.68968
Cenpi	1.49881	5.49389	-13.7565	6.99737e-07	6.32198e-05	6.70766
Flna	1.49789	10.5539	-16.3384	1.82645e-07	3.42995e-05	8.07278
Gabrr2	1.49717	6.48707	-13.2036	9.61713e-07	7.44293e-05	6.37898
Mt2	1.4932	7.42274	-3.43055	0.00884448	0.0363656	-3.36675
Plk1	1.49304	6.45359	-19.6918	4.19264e-08	1.4574e-05	9.5144
Tcf7	1.49158	9.92186	-14.9514	3.65803e-07	4.84016e-05	7.37189
Susd4	1.49045	6.43012	-14.7941	3.97286e-07	5.01938e-05	7.28783
Ighv14-2	1.48831	4.97288	-7.75606	5.23003e-05	0.000961136	2.13715
D9Ertd256e	1.48781	7.05171	-8.49983	2.68818e-05	0.000609866	2.85327
Parpbp	1.48713	5.45529	-11.4359	2.90544e-06	0.000146186	5.22322
Cd22	1.48641	6.63689	-10.5015	5.55518e-06	0.000212162	4.53784
E430022K19Rik	1.4861	6.2314	-6.17726	0.000257731	0.00290588	0.415789
Neil3	1.48517	5.64573	-8.85692	1.98588e-05	0.000499123	3.17828
Crtam	1.48347	7.44714	-9.66782	1.03531e-05	0.000322694	3.8752
Sbk1	1.47497	6.07275	-19.319	4.87684e-08	1.58761e-05	9.36942
Scpep1	1.46889	5.76027	-12.6854	1.31047e-06	9.03161e-05	6.05745
Ccne1	1.46744	7.61734	-8.71181	2.24312e-05	0.000534932	3.04761
Itgax	1.46346	6.45255	-9.26704	1.41993e-05	0.000390104	3.53761
Naip5	1.46138	5.5977	-11.4957	2.79192e-06	0.000143149	5.26519
Pcsk1	1.46088	6.80705	-13.522	7.99605e-07	6.94877e-05	6.57
C230011H18Rik	1.45876	6.56799	-4.28819	0.00261122	0.0152748	-2.0746
Gm4274	1.45513	6.20938	-5.62912	0.00047986	0.00447949	-0.25508
Zeb2	1.45507	4.83504	-10.4837	5.62686e-06	0.000214102	4.52423
Trip13	1.45147	5.51839	-15.3501	2.97806e-07	4.42587e-05	7.58061
Cdc25c	1.44383	6.31589	-14.6957	4.18506e-07	5.01938e-05	7.23477
Ext1	1.4424	8.96652	-8.02919	4.0726e-05	0.000813416	2.40654
Plekhg2	1.44188	9.52507	-10.7234	4.74143e-06	0.000194484	4.70579
Brip1	1.44046	6.11063	-12.945	1.1207e-06	8.23039e-05	6.22021
Inpp5f	1.43803	6.81404	-10.1811	7.01993e-06	0.0002478	4.2892
Abhd4	1.43501	6.12802	-13.3495	8.83273e-07	7.1343e-05	6.46709
Plp2	1.43414	8.82081	-13.3802	8.67687e-07	7.11816e-05	6.48552
9430099H24Rik	1.43298	4.7452	-6.83753	0.000127983	0.00178363	1.17174
Cdk6	1.43274	7.03948	-15.0739	3.43215e-07	4.69267e-05	7.43668
Dscc1	1.43269	5.73218	-13.9078	6.42751e-07	5.96479e-05	6.79514
Zcchc12	1.43054	5.46563	-10.1486	7.19078e-06	0.000251665	4.26362
Cabcoco1	1.42922	5.60943	-18.2689	7.58368e-08	1.94266e-05	8.94169
AA407881	1.42889	5.67524	-6.97901	0.000110868	0.00162066	1.32673
Egln3	1.42858	7.6309	-9.88167	8.78714e-06	0.000287425	4.05012
Tmc4	1.42632	7.59066	-9.46484	1.21321e-05	0.000353434	3.70585
Poglut3	1.42594	7.44902	-16.079	2.07077e-07	3.52992e-05	7.94695
Ttk	1.4217	5.75512	-14.186	5.51006e-07	5.62218e-05	6.95337
B930012P20Rik	1.41266	6.0314	-7.99919	4.18465e-05	0.000830009	2.37732
Gm38654	1.41136	3.74754	-6.48615	0.000184584	0.00229293	0.776279
6030422H21Rik	1.40956	7.04965	-5.15721	0.000845997	0.00675119	-0.866042
Spo11	1.4084	7.63272	-8.87017	1.96407e-05	0.000496074	3.19012
Ezh2	1.40186	10.0858	-20.7605	2.75854e-08	1.16939e-05	9.91173
9130004J05Rik	1.4011	8.52826	-7.07639	0.000100563	0.00151129	1.43203
Capn3	1.39993	6.06991	-11.7066	2.42939e-06	0.000132643	5.41151
Gins1	1.39268	7.46262	-10.1049	7.42837e-06	0.000256479	4.22903
Cdcp1	1.38858	4.92041	-10.4395	5.80985e-06	0.000219034	4.49026
Nipal1	1.38431	7.52595	-9.86932	8.87004e-06	0.000288785	4.04011
Mcm10	1.38406	5.69257	-10.9941	3.92347e-06	0.000174547	4.9062
Adamts3	1.38299	5.98364	-7.82732	4.89635e-05	0.000918592	2.20818
Ndrg2	1.37978	5.52239	-9.91006	8.59989e-06	0.000283939	4.07308
Pipox	1.37767	4.95248	-6.30809	0.000223437	0.00262455	0.56998
Ralb	1.37549	7.93924	-16.0959	2.0538e-07	3.52992e-05	7.95521
Nusap1	1.37489	6.57684	-12.4003	1.56142e-06	9.93625e-05	5.87469
Gins2	1.37011	7.61895	-12.4298	1.53309e-06	9.82567e-05	5.89381
E130308A19Rik	1.3684	5.81474	-11.5772	2.6452e-06	0.000141277	5.32201
Eea1	1.36753	9.40438	-7.97781	4.26658e-05	0.000842998	2.35645
Coprs	1.36579	5.40729	-11.2958	3.1922e-06	0.000153447	5.12401
9530067D14Rik	1.35878	6.07657	-4.94959	0.00109645	0.00817119	-1.14493
9930031P18Rik	1.3557	9.73094	-4.28567	0.00262017	0.0153054	-2.07826
Crmp1	1.34976	6.67843	-10.5294	5.44476e-06	0.0002099	4.55914
Acot11	1.34898	6.98874	-13.3506	8.82722e-07	7.1343e-05	6.46774
AA408396	1.34701	5.6311	-3.45171	0.00857169	0.0355394	-3.33388
Cks1b	1.34495	9.88863	-14.1558	5.602e-07	5.68769e-05	6.93639
Pmaip1	1.34453	7.79868	-4.07924	0.00348104	0.0186161	-2.38102
Sell	1.34338	7.18633	-10.0517	7.72951e-06	0.000264208	4.18673
Pstpip2	1.34088	4.62562	-14.3934	4.92133e-07	5.34072e-05	7.06917
Pmch	1.33829	6.48525	-14.7009	4.17362e-07	5.01938e-05	7.23757
Nrgn	1.3355	6.78359	-9.34066	1.33872e-05	0.000375591	3.60061
Neu3	1.33488	8.49142	-8.04844	4.00246e-05	0.000805558	2.42524
Plek	1.33201	6.86821	-9.22523	1.46847e-05	0.00039922	3.50164
2610030P05Rik	1.33089	6.65841	-5.95703	0.000329326	0.00346367	0.151127
Prim1	1.32279	10.0974	-16.117	2.03276e-07	3.52992e-05	7.96555
A130071D04Rik	1.31842	11.0307	-7.90375	4.56448e-05	0.000878169	2.28377
Egr2	1.3149	11.1068	-7.72493	5.38369e-05	0.000980588	2.10595
E030024N20Rik	1.31194	6.61898	-6.80342	0.000132533	0.00181814	1.13402
Cenpf	1.30891	5.08459	-12.5575	1.41702e-06	9.4051e-05	5.97597
Sema4c	1.30848	6.16709	-7.44224	7.03251e-05	0.00116221	1.81793
Kif23	1.30651	5.30583	-10.7296	4.72075e-06	0.000194024	4.71042
Prr11	1.30649	5.93898	-12.5443	1.42855e-06	9.451e-05	5.96752
Ephx1	1.30488	10.9522	-16.2281	1.92614e-07	3.49585e-05	8.01957
Ncapd2	1.30366	7.16258	-14.9199	3.71866e-07	4.847e-05	7.35516
Decr1	1.30322	8.64237	-17.9619	8.66823e-08	2.14189e-05	8.81099
5830435N17Rik	1.3025	9.96461	-5.41616	0.00061745	0.00531847	-0.526884
Mcoln3	1.30157	4.08341	-13.322	8.97519e-07	7.1343e-05	6.45053
Mad2l1	1.30119	8.91989	-10.4116	5.92842e-06	0.000220704	4.46881
Espl1	1.30058	5.52909	-11.3645	3.04775e-06	0.000151001	5.17283
A130004G11Rik	1.29868	7.5702	-4.04834	0.00363421	0.0192545	-2.42683
Bcl6	1.29565	8.92112	-11.2914	3.20179e-06	0.000153447	5.12084
Cx3cr1	1.2944	5.42622	-7.38127	7.45735e-05	0.00121221	1.75466
Ctla4	1.29116	10.0912	-3.42621	0.00890147	0.0365293	-3.37349
Atad5	1.28934	7.92148	-11.5454	2.70145e-06	0.000141698	5.29987
Slfn4	1.28908	6.46779	-10.6361	5.0445e-06	0.000200499	4.64012
Chek2	1.28717	6.40764	-8.09326	3.8443e-05	0.000786291	2.46863
Dipk1a	1.28646	8.65475	-15.294	3.06455e-07	4.43568e-05	7.55161
Mcm3	1.28641	9.5141	-12.0302	1.97109e-06	0.000116221	5.63092
Ndc80	1.28559	7.86783	-12.9281	1.13212e-06	8.23353e-05	6.20967
Nsg2	1.28161	8.64367	-15.0431	3.48737e-07	4.73659e-05	7.42046
Klrb1a	1.28143	5.89945	-7.77372	5.14505e-05	0.000948066	2.1548
Racgap1	1.27952	5.6127	-10.9629	4.009e-06	0.0001772	4.8834
2810455B08Rik	1.27885	5.10479	-4.16628	0.00308574	0.0171784	-2.25267
Bub1b	1.2788	6.72518	-16.3733	1.79608e-07	3.41456e-05	8.08955
Dhrs3	1.27447	8.23795	-7.95266	4.36526e-05	0.00085672	2.33183
Timeless	1.27206	7.07287	-8.41461	2.89409e-05	0.000634133	2.77397
Pxmp2	1.27036	6.04052	-12.3592	1.60179e-06	0.00010077	5.84802
Ddit4	1.26731	11.506	-12.7861	1.23292e-06	8.74946e-05	6.12097
Sgcb	1.2671	6.18241	-14.9237	3.71139e-07	4.847e-05	7.35715
Klk1b16	1.26641	3.88047	-6.96025	0.000112984	0.0016434	1.30632
Ggt7	1.26501	7.0364	-9.29167	1.39216e-05	0.000384279	3.55874
Pfn2	1.26312	8.71282	-13.3881	8.63751e-07	7.11816e-05	6.49022
A730046G19Rik	1.26242	6.85465	-6.58871	0.00016563	0.00213106	0.893291
Ebi3	1.25714	8.23221	-13.4621	8.27619e-07	7.09026e-05	6.53441
Tjp2	1.25499	7.53934	-14.5916	4.42377e-07	5.1844e-05	7.17815
Chn1	1.25369	5.10517	-10.3494	6.20325e-06	0.000227589	4.42067
Mid1ip1	1.25227	8.19385	-14.6969	4.18256e-07	5.01938e-05	7.23538
Adamts6	1.24998	6.67551	-9.62132	1.07334e-05	0.000329538	3.83669
Ryr1	1.2487	5.4361	-13.6784	7.31351e-07	6.4652e-05	6.6621
Dtl	1.24811	7.01307	-8.42714	2.86274e-05	0.00063085	2.78567
Fam72a	1.2456	6.44002	-10.4731	5.67016e-06	0.000215351	4.51609
Cdc45	1.24485	7.27217	-10.1217	7.33633e-06	0.000255451	4.2423
Gemin8	1.24414	6.68481	-15.9807	2.17279e-07	3.59369e-05	7.89865
Tacc3	1.24259	7.57652	-12.5182	1.45161e-06	9.5115e-05	5.95082
Rap1gap2	1.24204	8.13229	-10.9436	4.06318e-06	0.000178648	4.8692
Moxd2	1.24178	4.17248	-8.52869	2.62218e-05	0.000599536	2.87997
Ppic	1.24079	5.80207	-7.15374	9.31315e-05	0.0014254	1.51489
Optn	1.23488	6.74318	-9.99787	8.04832e-06	0.000271988	4.14369
Nanos1	1.23481	7.4343	-14.254	5.3087e-07	5.52671e-05	6.99155
Cdca2	1.22765	5.4971	-11.3197	3.14116e-06	0.000152659	5.141
BC046401	1.22743	7.56948	-7.72851	5.36574e-05	0.000978759	2.10955
Dck	1.22486	8.41754	-14.4034	4.89461e-07	5.34072e-05	7.07474
Adap1	1.22376	6.68177	-10.431	5.84585e-06	0.000219182	4.4837
Styk1	1.21918	7.83133	-6.15979	0.000262736	0.00294517	0.395021
Cdkn2d	1.21852	8.62455	-10.0247	7.88771e-06	0.000268274	4.16516
Ptrh1	1.21625	6.83234	-12.8323	1.19907e-06	8.57819e-05	6.14994
Prelid2	1.2155	5.90479	-13.9253	6.36511e-07	5.96083e-05	6.80517
Pecam1	1.21101	8.09443	-13.2625	9.29161e-07	7.30121e-05	6.41466
Brca2	1.21085	7.58384	-8.37502	2.99567e-05	0.000653555	2.73689
Prdx4	1.21071	7.22423	-10.9054	4.17264e-06	0.00018029	4.84108
Wdhd1	1.21053	7.84227	-11.4345	2.90819e-06	0.000146186	5.22222
Anxa2	1.20841	6.29488	-12.5241	1.44637e-06	9.5115e-05	5.95459
4933427D14Rik	1.20701	7.45753	-10.111	7.39473e-06	0.000256479	4.23386
BC055324	1.20647	7.83146	-14.0315	5.99978e-07	5.83377e-05	6.86595
Ybx3	1.20615	10.8395	-16.6443	1.57889e-07	3.23815e-05	8.21824
Gabarapl1	1.20361	7.86119	-5.31949	0.000693727	0.00579929	-0.652383
Dusp4	1.20077	6.9107	-4.70015	0.00150954	0.0102957	-1.4882
5930405F01Rik	1.19872	6.6241	-5.15043	0.000853117	0.00679555	-0.875061
Exo1	1.19763	4.99427	-7.61091	5.99065e-05	0.00104921	1.99082
Baiap3	1.19494	8.45806	-7.93553	4.43389e-05	0.000864399	2.31503
Afm	1.19403	5.927	-6.87866	0.000122723	0.00174423	1.21705
Omd	1.19213	4.82878	-5.82721	0.000381615	0.00382342	-0.00792793
Lrrc23	1.19207	7.03816	-16.0156	2.13591e-07	3.56141e-05	7.91585
Tpx2	1.18327	5.30633	-10.6698	4.92513e-06	0.000198256	4.66551
9030425P06Rik	1.18071	7.90989	-8.2108	3.46148e-05	0.000730332	2.58149
Lyl1	1.18026	5.72298	-10.5143	5.50445e-06	0.000211406	4.54757
Mybl2	1.17973	4.75968	-12.8933	1.15592e-06	8.37695e-05	6.18805
Ccdc28b	1.17854	6.32635	-11.1568	3.50828e-06	0.000162434	5.02437
Dut	1.17598	8.83671	-11.1309	3.57083e-06	0.000164202	5.00571
5830485P09Rik	1.17538	5.81487	-5.50002	0.000558688	0.00493885	-0.41909
Ssh3	1.17425	6.50066	-9.78037	9.49335e-06	0.000301647	3.9677
Gm8369	1.17043	7.76595	-13.4362	8.40086e-07	7.09026e-05	6.51895
Spc25	1.17014	6.34532	-12.0095	1.99733e-06	0.000117038	5.61706
Gmnn	1.16768	9.58621	-9.70766	1.00393e-05	0.000315307	3.90805
Tlr1	1.16746	9.20213	-9.22215	1.47212e-05	0.000399361	3.49899
AI467606	1.16634	9.76651	-6.80822	0.000131882	0.0018138	1.13934
Dram1	1.16549	5.6983	-5.79331	0.00039673	0.00394212	-0.0498437
Lmnb1	1.16374	9.69112	-13.8507	6.63611e-07	6.10314e-05	6.76226
Gzmk	1.16274	6.03433	-10.9256	4.11424e-06	0.000179913	4.85599
1700029J07Rik	1.16167	5.04206	-8.96345	1.81792e-05	0.000467214	3.27302
Fcer1g	1.15983	8.57964	-9.86054	8.92948e-06	0.000289312	4.03299
Ska1	1.15878	5.54551	-11.9415	2.0863e-06	0.000119519	5.57136
Marcks	1.15875	6.59228	-7.70003	5.51014e-05	0.000995661	2.08093
D5Ertd121e	1.1573	6.29974	-4.47499	0.00203039	0.0126916	-1.80573
Aunip	1.15709	5.57283	-10.7463	4.66516e-06	0.000193002	4.72296
Lbhd2	1.15506	4.99636	-10.5343	5.42582e-06	0.000209563	4.56284
Spin4	1.15232	5.01137	-10.6731	4.91354e-06	0.000198256	4.668
Mpo	1.15171	4.5871	-5.88262	0.000358257	0.00365133	0.0602408
Plscr1	1.15121	8.85256	-5.53617	0.000535274	0.00479552	-0.372931
Bex1	1.1508	3.80726	-7.58771	6.12323e-05	0.00106425	1.96722
Cldn12	1.1455	6.37108	-6.96027	0.000112981	0.0016434	1.30635
Diaph3	1.14463	6.26656	-8.74101	2.18851e-05	0.000527428	3.07406
Serinc5	1.14376	8.2721	-11.4526	2.87321e-06	0.000145498	5.23497
Ms4a4d	1.14231	6.39066	-9.53988	1.14375e-05	0.000341444	3.76884
Smtn	1.14216	4.32687	-10.0462	7.76181e-06	0.00026487	4.18229
Rnf128	1.14191	8.39996	-8.53846	2.60025e-05	0.00059585	2.88899
Synpo	1.1402	6.06804	-10.7792	4.55831e-06	0.00019157	4.74751
Kif20b	1.13994	5.33852	-10.6033	5.16385e-06	0.000202496	4.61533
Stk39	1.13894	9.07809	-10.6821	4.88213e-06	0.000198256	4.6748
Alms1	1.13711	5.86769	-15.5317	2.71613e-07	4.21589e-05	7.67373
B3gnt9	1.13575	4.04798	-9.29667	1.38659e-05	0.000383774	3.56303
Plcl1	1.13441	4.35062	-12.5834	1.39471e-06	9.28702e-05	5.99253
Rab39b	1.13376	4.49619	-16.5372	1.661e-07	3.32562e-05	8.16767
Spry1	1.1337	8.45719	-6.25185	0.000237521	0.00273823	0.50397
Zbtb45	1.1333	6.88247	-9.22926	1.46371e-05	0.000398663	3.50511
H2afx	1.1291	8.22835	-12.2838	1.67907e-06	0.000104352	5.79877
AA414768	1.12731	5.46301	-7.20553	8.84966e-05	0.00136773	1.56998
Ptms	1.1272	7.81244	-15.3098	3.03983e-07	4.43568e-05	7.55981
Tmem237	1.12427	7.6975	-12.5943	1.38536e-06	9.28702e-05	5.99954
5730409N24Rik	1.12099	4.55386	-5.77015	0.000407433	0.00401885	-0.0785699
Gpr155	1.11988	9.97578	-10.9021	4.18238e-06	0.00018029	4.83861
Tmc6	1.11868	9.81193	-9.95973	8.28291e-06	0.000277572	4.11309
Ccdc14	1.11845	8.01779	-7.62557	5.90852e-05	0.00104197	2.0057
AB124611	1.11826	9.80452	-12.3158	1.64576e-06	0.000102593	5.81972
Dhfr	1.1173	6.94742	-10.8984	4.19319e-06	0.00018029	4.83588
AU020147	1.11581	6.28086	-7.20932	8.81675e-05	0.0013639	1.574
2810040C05Rik	1.11502	5.52807	-4.42549	0.00216927	0.0133097	-1.8765
Nenf	1.11498	7.54869	-13.2888	9.15003e-07	7.21762e-05	6.43056
D13Ertd787e	1.11145	6.02707	-6.51353	0.000179299	0.00224636	0.807653
F13a1	1.11134	4.97222	-5.95854	0.000328765	0.00345953	0.15297
Slc25a13	1.11107	8.45639	-13.4058	8.54934e-07	7.11816e-05	6.50083
Plxna3	1.10955	5.58917	-8.18998	3.52608e-05	0.000738676	2.5616
Xkr5	1.1093	4.2985	-14.0464	5.95065e-07	5.83377e-05	6.8744
B930068K11Rik	1.1065	5.00368	-9.61084	1.08212e-05	0.000330657	3.828
Trip6	1.10471	6.82523	-5.41636	0.000617301	0.00531847	-0.526624
Pawr	1.10438	4.26039	-10.2185	6.82841e-06	0.000243555	4.31862
Gm38448	1.10427	9.80387	-3.8214	0.00500732	0.0241133	-2.76699
AU018740	1.10277	5.66038	-9.1446	1.5674e-05	0.000419112	3.43185
Ptprv	1.10179	8.8507	-11.2207	3.35877e-06	0.000158721	5.07034
Ccr7	1.10136	8.24025	-3.62168	0.00667922	0.0296246	-3.07143
Ryk	1.10106	5.49713	-11.1789	3.45565e-06	0.000162178	5.04033
E230008J23Rik	1.10088	7.25657	-14.9872	3.59037e-07	4.84016e-05	7.39088
Skp2	1.09982	5.04098	-6.81979	0.000130327	0.00180235	1.15214
Armcx6	1.09961	5.07309	-14.7643	4.03579e-07	5.01938e-05	7.27181
Med7	1.09892	10.1326	-9.42938	1.24766e-05	0.00035989	3.67593
8430437O03Rik	1.09461	6.26029	-4.49867	0.00196738	0.0123732	-1.772
Ifitm1	1.09156	7.09562	-5.18811	0.0008144	0.00654745	-0.825074
Ifitm2	1.09132	6.67389	-4.79742	0.00133116	0.00936564	-1.35328
Tle3	1.09058	9.45762	-12.4496	1.51445e-06	9.7366e-05	5.90659
Gm11346	1.08995	8.63383	-11.4302	2.91655e-06	0.000146248	5.2192
Trpc2	1.08873	6.75435	-8.65458	2.35461e-05	0.000553174	2.99555
A930026B05Rik	1.08762	6.93231	-8.70895	2.24856e-05	0.000535607	3.04501
9430031J08Rik	1.08369	3.9362	-6.09144	0.00028336	0.00310772	0.313423
Il6ra	1.08306	7.71149	-9.44493	1.23242e-05	0.000357001	3.68907
Gng3	1.08142	5.03876	-6.3146	0.000221867	0.0026121	0.577594
Adk	1.08137	6.92623	-12.9407	1.12358e-06	8.23039e-05	6.21754
C030040A22Rik	1.07892	7.69621	-7.44744	6.99754e-05	0.00116111	1.8233
Gatm	1.07842	3.54609	-3.37681	0.00957913	0.0384986	-3.45039
Syde1	1.07819	5.99346	-7.79299	5.05407e-05	0.000937986	2.17403
Ccdc25	1.07526	5.99387	-3.96417	0.00408944	0.0208581	-2.55225
Tnfsf11	1.0744	9.18023	-8.6411	2.38176e-05	0.000556983	2.98324
DXErtd242e	1.07362	4.40461	-4.64348	0.00162532	0.0108581	-1.56743
4930549O18Rik	1.0734	4.76967	-5.21078	0.000792034	0.0064053	-0.795097
Zfp821	1.07325	7.36043	-8.45698	2.7896e-05	0.000619847	2.81348
BB045044	1.0727	7.71031	-4.04852	0.0036333	0.0192545	-2.42656
Smpdl3b	1.07205	6.06342	-7.49905	6.66071e-05	0.00112727	1.8765
Ifi30	1.07148	10.2018	-10.5849	5.23232e-06	0.000204208	4.60136
Hap1	1.07013	4.72084	-6.78303	0.000135339	0.00183575	1.1114
Chek1	1.0695	6.01406	-7.79223	5.05763e-05	0.000937986	2.17327
2610318N02Rik	1.06529	6.96138	-8.77827	2.12097e-05	0.000517229	3.10769
Anxa5	1.06312	8.77197	-11.0552	3.76136e-06	0.000169177	4.9508
C76434	1.06254	5.33206	-3.66538	0.0062682	0.0284036	-3.00444
Mcm8	1.06106	6.25707	-9.75775	9.65955e-06	0.000305251	3.94919
Rad51c	1.05724	5.80031	-7.53876	6.41379e-05	0.001098	1.91724
Plcb4	1.05498	6.17126	-6.56181	0.000170384	0.00217314	0.862726
Wee1	1.05469	7.46918	-8.87857	1.9504e-05	0.000493227	3.19761
Pcbp4	1.05435	6.05357	-10.7372	4.69527e-06	0.000193364	4.71615
Usp53	1.05242	6.82299	-13.3467	8.84714e-07	7.1343e-05	6.46541
Ercc6l	1.05229	5.35395	-6.24111	0.000240321	0.0027612	0.491315
Slc22a3	1.05199	8.52145	-4.04953	0.00362821	0.0192326	-2.42507
Hc	1.05149	5.9066	-5.64122	0.000473121	0.00443678	-0.239827
Ptger2	1.05114	8.06805	-4.26267	0.00270361	0.0156325	-2.11171
Dgkz	1.05039	10.913	-10.7019	4.81423e-06	0.000197076	4.68964
Matn2	1.04373	3.67098	-9.60064	1.09075e-05	0.000332312	3.81952
Klhl4	1.04328	7.32819	-11.161	3.49808e-06	0.000162434	5.02745
Haus1	1.04251	8.83813	-11.3543	3.06889e-06	0.000151298	5.16554
A230048O21Rik	1.04173	6.60991	-5.177	0.000825608	0.00662198	-0.839786
Gsn	1.04138	6.92944	-14.4388	4.802e-07	5.34072e-05	7.09429
Adamts20	1.03979	3.23267	-4.98406	0.00104979	0.0079106	-1.0982
Mtbp	1.03774	8.51574	-10.8115	4.45611e-06	0.000188823	4.77152
Flrt2	1.03763	4.1347	-10.3848	6.04529e-06	0.000222991	4.44807
D17Ertd165e	1.03756	7.6517	-3.88159	0.00459594	0.0226855	-2.67615
AA415038	1.03714	8.98633	-6.08677	0.000284835	0.00312016	0.30782
Epha3	1.03648	3.84896	-10.4006	5.9762e-06	0.00022161	4.46028
Tspan3	1.03494	8.61237	-14.5089	4.62408e-07	5.25181e-05	7.1329
Kctd15	1.03199	3.72429	-6.19722	0.000252143	0.00286018	0.439458
4833444G19Rik	1.03171	6.47535	-6.66865	0.000152346	0.00199519	0.983575
Zmym4	1.03131	8.05483	-9.23794	1.45351e-05	0.000396853	3.5126
A130088B03Rik	1.03127	7.00983	-6.80771	0.000131951	0.0018138	1.13877
Cenpk	1.03026	5.20086	-8.55077	2.57289e-05	0.000590901	2.90035
A630001G21Rik	1.02807	8.64951	-8.32719	3.12371e-05	0.000673745	2.6919
Zfp748	1.02799	7.3566	-3.64738	0.00643423	0.0289585	-3.03202
Wscd2	1.0262	5.6718	-11.9578	2.06451e-06	0.000118936	5.58237
Smc2	1.02583	8.0512	-14.4195	4.85222e-07	5.34072e-05	7.08364
Ikzf2	1.02495	9.48874	-11.5387	2.71334e-06	0.000141959	5.29525
Gm14057	1.02458	5.80143	-5.15034	0.000853212	0.00679555	-0.875182
Depdc1b	1.02192	6.67666	-7.97895	4.26215e-05	0.000842935	2.35757
Cenpp	1.02116	6.16355	-14.1266	5.6929e-07	5.6954e-05	6.91987
Hmgb3	1.02081	8.0898	-10.687	4.86538e-06	0.000198256	4.67844
D3Wsu106e	1.02001	5.88826	-4.33807	0.00244034	0.0145703	-2.00234
Cldn34c1	1.01986	3.81747	-6.69507	0.000148217	0.00196368	1.01325
Dna2	1.01807	5.56915	-10.5836	5.23739e-06	0.000204208	4.60033
Mettl8	1.01756	5.77635	-9.18218	1.5204e-05	0.000409105	3.46445
Ddias	1.01704	6.14161	-7.86415	4.73321e-05	0.000893862	2.24468
Sh2d1a	1.01661	11.8083	-12.9347	1.12767e-06	8.23039e-05	6.21376
Ska2	1.01586	8.21562	-6.91509	0.000118265	0.00169911	1.257
Mis18bp1	1.01442	4.83232	-13.3579	8.78984e-07	7.1343e-05	6.47213
Rgs10	1.01415	11.5378	-13.6986	7.23015e-07	6.4471e-05	6.67392
Tnfrsf4	1.01349	8.3591	-11.812	2.26814e-06	0.000127397	5.48366
Chrnb1	1.012	4.94303	-8.52444	2.63178e-05	0.000601059	2.87605
March8	1.01038	5.44636	-11.9255	2.10776e-06	0.000120412	5.56063
Fancb	1.00985	6.2365	-13.3154	9.00963e-07	7.1343e-05	6.44657
Rnf43	1.00918	7.15133	-10.7528	4.64404e-06	0.000193002	4.72777
Atcay	1.00889	5.11971	-10.8181	4.4353e-06	0.00018833	4.77647
Gm36401	1.00827	4.23161	-5.72198	0.000430726	0.00418534	-0.138554
Gstm5	1.0067	4.99597	-4.55765	0.00181945	0.0117383	-1.68831
Armcx4	1.00651	5.8243	-4.68113	0.00154737	0.0104702	-1.51475
Mtfr2	1.00423	6.32183	-4.76986	0.00137925	0.00962798	-1.39136
Fen1	1.00411	9.77136	-10.233	6.75605e-06	0.000241815	4.32994
Tnfrsf13c	1.00251	6.50888	-9.24681	1.44319e-05	0.000394645	3.52022
Gclm	1.00226	6.91465	-12.1184	1.86356e-06	0.000113412	5.68969
4633401B06Rik	1.00158	6.33501	-11.5203	2.74668e-06	0.000142612	5.28239
6330417A16Rik	1.00075	7.56395	-3.18782	0.012718	0.0469632	-3.74636
Tipin	0.999587	9.33965	-9.45076	1.22676e-05	0.000356368	3.69398
Dnmt1	0.998806	10.5729	-11.0636	3.73974e-06	0.000169177	4.95689
Nek2	0.998761	4.85005	-9.51889	1.16272e-05	0.000343605	3.75127
S1pr1	0.997698	6.67646	-4.18429	0.00301014	0.0169091	-2.22624
Nup93	0.997148	9.49213	-12.8246	1.2046e-06	8.57819e-05	6.14514
Aknaos	0.995381	8.74283	-4.1516	0.00314885	0.0173695	-2.27424
Dpp4	0.994892	8.68364	-10.283	6.51179e-06	0.000235124	4.36909
4930503L19Rik	0.994878	8.13532	-10.3242	6.31831e-06	0.000230574	4.40115
Haspin	0.994787	7.13278	-10.012	7.96308e-06	0.000270389	4.15503
Gpr83	0.993675	5.30794	-11.7377	2.38058e-06	0.000130837	5.43284
Rad54l	0.992819	5.79559	-6.78768	0.000134693	0.00182942	1.11656
Dab2ip	0.992469	6.3613	-6.39973	0.000202421	0.00244635	0.676656
Cenps	0.992273	7.21225	-6.23768	0.000241224	0.0027687	0.487266
Hnrnpll	0.991334	10.6008	-10.9206	4.12874e-06	0.000180162	4.85227
Bbs12	0.991059	7.47016	-7.77605	5.13398e-05	0.000947729	2.15712
Farsb	0.990924	9.15521	-11.7958	2.29215e-06	0.000127397	5.4726
Sh3gl3	0.988332	8.662	-8.76415	2.14628e-05	0.000520925	3.09496
Abtb2	0.984798	7.62962	-6.4071	0.000200827	0.00243569	0.685197
Fignl1	0.984766	6.56146	-6.67176	0.000151853	0.00199255	0.987073
2700081O15Rik	0.983755	4.24299	-12.4863	1.48049e-06	9.57833e-05	5.93026
Anln	0.979972	5.03932	-9.95084	8.33865e-06	0.00027853	4.10595
Pif1	0.979904	5.66222	-9.57685	1.11117e-05	0.000336489	3.79971
Top2a	0.979479	6.43854	-8.82219	2.04431e-05	0.000508204	3.14718
Psat1	0.978776	10.6444	-10.3949	6.00102e-06	0.000221757	4.45588
Tiam1	0.974593	5.85389	-11.0705	3.72186e-06	0.000169177	4.96195
Ttc16	0.972571	5.11764	-8.44703	2.81375e-05	0.000623861	2.80422
Cenpw	0.972377	5.52973	-7.65583	5.74288e-05	0.00102597	2.03634
B230354K17Rik	0.971161	7.98184	-6.39089	0.000204349	0.00246342	0.666418
Magee1	0.971119	4.6113	-10.8765	4.25758e-06	0.000182675	4.81976
Rpa1	0.969092	10.4651	-14.305	5.16318e-07	5.43034e-05	7.02004
Stk32c	0.967921	4.97078	-4.56291	0.00180687	0.0116937	-1.68089
D230044B12Rik	0.967471	8.79872	-6.04566	0.000298171	0.00322872	0.258415
Fbxw17	0.966327	7.99289	-10.5587	5.33166e-06	0.000206705	4.58141
Gm30054	0.96625	9.00261	-6.798	0.000133273	0.00182219	1.12801
Ephb6	0.965644	6.03932	-5.01668	0.00100764	0.00767669	-1.05413
Fam92a	0.965406	6.92533	-7.04565	0.000103697	0.00154221	1.39891
Gstp3	0.965182	10.0105	-7.64656	5.79305e-05	0.00103093	2.02697
Lgmn	0.964839	5.31178	-8.28316	3.24699e-05	0.000695847	2.65028
Slc43a1	0.963255	3.87312	-7.77732	5.1279e-05	0.00094746	2.1584
Mcm7	0.962697	9.81405	-9.86524	8.8976e-06	0.000288785	4.03681
Arhgef1	0.96205	9.78256	-7.53195	6.45539e-05	0.00110236	1.91027
Heg1	0.960447	8.95728	-5.59237	0.000500978	0.00459818	-0.301529
Mtmr7	0.958442	6.65235	-7.87127	4.70237e-05	0.000890501	2.25172
Bambi-ps1	0.958084	6.39828	-8.70706	2.25215e-05	0.000535839	3.0433
Meak7	0.957084	6.14444	-12.0916	1.89546e-06	0.000114055	5.67191
Cip2a	0.957015	7.33866	-11.564	2.6684e-06	0.000141698	5.31282
2310031A07Rik	0.95659	8.18588	-9.79443	9.39166e-06	0.000299842	3.97919
Gjb2	0.954151	6.79216	-8.81919	2.04946e-05	0.000508272	3.14448
Rabgap1l	0.953513	9.6676	-9.52914	1.15342e-05	0.000342832	3.75985
Syce2	0.953336	8.48371	-11.5976	2.60973e-06	0.000139747	5.33621
Atp1b1	0.952092	8.23691	-13.9904	6.13841e-07	5.84676e-05	6.84247
4930579G24Rik	0.950913	8.58759	-5.99487	0.000315607	0.00335899	0.197063
Itga6	0.949566	8.79911	-10.5047	5.54249e-06	0.000212162	4.54026
Aqp1	0.949525	5.05884	-3.15242	0.0134178	0.0487658	-3.80208
6720454L07Rik	0.948048	6.34621	-4.34685	0.00241153	0.0144509	-1.98965
Lgals3	0.946396	8.65827	-4.89283	0.00117825	0.00861794	-1.22225
4933402E15Rik	0.946356	5.57203	-4.71847	0.00147405	0.0101075	-1.46268
Zfp974	0.945278	5.51795	-6.27639	0.000231259	0.00269363	0.532823
C530045E16Rik	0.944393	5.88318	-4.41111	0.00221153	0.0135029	-1.89713
Cyfip1	0.944122	7.48642	-12.3866	1.57476e-06	9.9681e-05	5.86581
Gen1	0.943254	6.36494	-8.34498	3.07539e-05	0.000666032	2.70866
2610202C22Rik	0.943181	6.91102	-4.56048	0.00181268	0.0117127	-1.68432
Slc25a24	0.942621	8.22159	-7.11027	9.72303e-05	0.00147711	1.46841
Ubash3b	0.9403	9.64882	-8.22375	3.42197e-05	0.000724263	2.59384
Perp	0.940283	7.07916	-3.90572	0.0044413	0.0221299	-2.63985
Ifnar2	0.940013	8.10644	-10.4983	5.56827e-06	0.000212267	4.53534
Tstd3	0.9398	9.94255	-9.93687	8.42712e-06	0.000280571	4.0947
C130051F05Rik	0.939471	5.6198	-3.35588	0.00988256	0.039348	-3.48304
Igf2bp3	0.939339	5.13284	-6.55059	0.000172412	0.00218812	0.84995
Cep97	0.937521	8.25101	-9.35029	1.32849e-05	0.000373232	3.60881
Mlh3	0.936826	7.37286	-8.19913	3.49753e-05	0.000734948	2.57034
Mcm2	0.9368	9.68452	-10.7897	4.52471e-06	0.000190549	4.75534
Cep170b	0.935598	7.45391	-11.553	2.6879e-06	0.000141698	5.30516
3110047M12Rik	0.935395	4.28904	-4.03797	0.00368724	0.019425	-2.44223
Pimreg	0.934051	5.67009	-11.3484	3.08107e-06	0.000151534	5.16137
Cep192	0.934018	8.77698	-8.0754	3.90647e-05	0.000790897	2.45136
Ptgir	0.93296	7.4928	-5.72578	0.000428834	0.00417615	-0.133806
Rilpl2	0.931205	11.4515	-11.9628	2.05795e-06	0.000118892	5.58571
Slc35f5	0.93077	6.96027	-8.78693	2.1056e-05	0.000517229	3.11549
Raf1	0.930714	9.84239	-12.0444	1.95333e-06	0.000115783	5.6404
Nsd2	0.929941	6.40967	-13.2187	9.53249e-07	7.43353e-05	6.38814
Neurl1b	0.929392	4.98795	-8.55956	2.55357e-05	0.000587121	2.90845
Zfp7	0.929096	7.57738	-9.89799	8.67898e-06	0.00028571	4.06332
Wfikkn2	0.928453	7.23628	-3.98771	0.00395626	0.0203662	-2.51708
Tlcd2	0.928087	5.50032	-13.1677	9.82236e-07	7.57319e-05	6.35709
Anxa7	0.928051	8.03229	-13.9624	6.23454e-07	5.89236e-05	6.82649
Eomes	0.925071	5.0452	-7.87019	4.70702e-05	0.000890501	2.25066
Rasa3	0.924199	9.79445	-12.3245	1.63688e-06	0.000102558	5.82538
Hsf4	0.923225	6.51905	-7.96252	4.32626e-05	0.000852328	2.34149
As3mt	0.922346	6.2284	-5.0102	0.00101586	0.00771353	-1.06287
Helb	0.920915	8.5565	-11.9792	2.03637e-06	0.000118312	5.59676
Kcnj8	0.920109	7.28218	-3.38027	0.00952995	0.0383686	-3.445
Gnb4	0.918736	5.03683	-8.93712	1.8579e-05	0.000475715	3.2497
5830408C22Rik	0.918274	6.42174	-5.44616	0.000595684	0.00519646	-0.488206
Palld	0.917657	4.94728	-9.8848	8.76631e-06	0.000287202	4.05265
Ildr1	0.917123	4.54789	-7.56218	6.27292e-05	0.00108292	1.94118
Cd99l2	0.915071	5.98545	-12.0871	1.90089e-06	0.000114055	5.66891
Mmd	0.914616	10.8223	-12.3998	1.56194e-06	9.93625e-05	5.87435
Kbtbd6	0.914534	4.78131	-7.33128	7.82692e-05	0.00125604	1.70249
Tonsl	0.913746	7.1338	-12.9357	1.12695e-06	8.23039e-05	6.21443
Tmem191c	0.912932	6.70668	-6.24566	0.000239131	0.00275215	0.496676
Zmym3	0.91141	7.1394	-9.8175	9.2274e-06	0.000295695	3.998
Knstrn	0.911363	6.57958	-13.641	7.47059e-07	6.54762e-05	6.64018
B930025B16Rik	0.909606	8.31554	-6.26462	0.000234241	0.00270956	0.518988
5530400N10Rik	0.908576	5.71575	-4.86647	0.00121849	0.00881794	-1.25832
Gcg	0.907985	3.67942	-4.75934	0.0013981	0.00972645	-1.40593
A230061C15Rik	0.907974	7.81818	-3.60733	0.00682043	0.0300689	-3.09349
Snx9	0.907699	5.45117	-10.6371	5.04103e-06	0.000200499	4.64085
Slc4a10	0.906763	4.87825	-7.90031	4.57886e-05	0.000879287	2.28038
Nqo2	0.906272	6.89615	-11.1361	3.55811e-06	0.000163985	5.00948
Cdan1	0.905389	8.74015	-8.49435	2.7009e-05	0.0006114	2.8482
Pbx3	0.905355	7.22379	-9.9976	8.04995e-06	0.000271988	4.14348
Fbxo5	0.904484	8.52054	-7.94433	4.39849e-05	0.000861592	2.32366
Pole2	0.903245	5.60417	-8.58376	2.50117e-05	0.000577663	2.93072
Gpat3	0.901432	6.13186	-5.19736	0.000805191	0.00649632	-0.812832
2810408B13Rik	0.900535	6.85679	-6.35224	0.000213027	0.00252903	0.621505
Il6st	0.899363	7.65438	-5.58349	0.000506234	0.0046226	-0.312785
B830007D08Rik	0.899135	8.88631	-4.18476	0.0030082	0.0169028	-2.22555
Tjp1	0.897513	4.96415	-5.32071	0.000692699	0.00579848	-0.650785
Osbpl5	0.897421	7.23499	-10.8423	4.36075e-06	0.000186322	4.79442
Cep70	0.896211	6.28165	-8.77571	2.12554e-05	0.000517728	3.10538
Rassf6	0.895875	3.36939	-6.27523	0.00023155	0.00269363	0.531462
D130084N16Rik	0.895808	7.69481	-10.6044	5.16e-06	0.000202496	4.61612
4933411D12Rik	0.895707	6.41983	-5.30481	0.000706187	0.00586602	-0.671558
Larp1b	0.895581	8.56007	-10.9025	4.18103e-06	0.00018029	4.83895
Cit	0.894814	6.13863	-10.1064	7.42006e-06	0.000256479	4.23022
Dop1a	0.894523	5.9036	-5.64612	0.000470423	0.00442564	-0.233658
Wdr90	0.89382	7.88119	-6.89434	0.000120781	0.00172323	1.23427
Slc24a3	0.893703	4.16637	-7.66718	5.68212e-05	0.00102044	2.04781
Cchcr1	0.892569	7.7401	-6.78657	0.000134847	0.00183029	1.11533
Defa3	0.892162	4.38466	-9.32943	1.35077e-05	0.000378143	3.59103
Sdcbp2	0.891758	8.0452	-7.32746	7.85604e-05	0.00125875	1.69848
Zfp229	0.891182	2.99973	-4.34625	0.00241347	0.0144561	-1.99051
Mtfp1	0.890087	6.16355	-7.10664	9.7581e-05	0.00147915	1.46453
Milr1	0.889695	5.86247	-6.02531	0.000305026	0.00328215	0.233877
Ndrg4	0.889159	3.98555	-6.4954	0.000182779	0.00227989	0.786894
Fnip2	0.888883	4.97527	-6.5385	0.000174626	0.00220938	0.836169
Spdl1	0.88835	6.68421	-6.91691	0.000118046	0.00169819	1.259
A930012M21Rik	0.888078	4.56372	-5.84689	0.000373133	0.00376789	0.0163307
Exo5	0.887941	8.43772	-4.40031	0.00224384	0.0136353	-1.91264
4732423E21Rik	0.887725	3.48161	-3.46778	0.00837051	0.0349066	-3.30894
Il18	0.886851	4.5807	-5.83566	0.000377948	0.00379967	0.00249435
Pold1	0.886277	8.54535	-10.5197	5.48296e-06	0.000210976	4.55172
Ikbke	0.886275	10.0757	-8.03929	4.03563e-05	0.00080906	2.41635
C430045I18Rik	0.886204	7.797	-4.59654	0.00172854	0.0113369	-1.63341
Ctc1	0.886022	6.54246	-9.66977	1.03375e-05	0.000322694	3.87682
Timp2	0.885448	6.9092	-12.6871	1.30916e-06	9.03161e-05	6.05849
Slc2a4rg-ps	0.882021	7.87658	-6.39399	0.000203671	0.00246	0.670009
Nqo1	0.881618	5.77562	-5.11455	0.000891858	0.00701346	-0.922849
Prr5l	0.88093	4.71547	-5.81995	0.000384798	0.00384369	-0.0168915
AI465300	0.880325	7.71442	-4.59221	0.00173842	0.0113727	-1.63952
Crppa	0.880207	3.94411	-8.18711	3.5351e-05	0.000739811	2.55885
Pot1b	0.879997	6.84721	-7.23176	8.62468e-05	0.00134624	1.59777
Gas2l3	0.878426	4.50909	-10.1856	6.9963e-06	0.0002478	4.29278
Bard1	0.878221	5.70209	-9.93447	8.44243e-06	0.00028058	4.09277
2210402A03Rik	0.877615	6.63794	-5.39275	0.000635041	0.00543349	-0.557156
Fam216a	0.876413	8.36972	-10.9507	4.04307e-06	0.000178321	4.87445
D1Ertd75e	0.876376	5.62956	-5.97669	0.000322117	0.00340707	0.17502
Parp3	0.875924	9.23598	-11.4247	2.9273e-06	0.000146429	5.21532
Morn4	0.875558	4.50855	-5.1471	0.000856635	0.00682016	-0.87949
Arhgef12	0.875342	5.74831	-10.0764	7.58821e-06	0.000260256	4.20637
C80256	0.874771	4.06383	-6.27527	0.000231541	0.00269363	0.531504
Dnajb14	0.874674	4.46833	-7.02066	0.000106323	0.00157216	1.37191
Tbx6	0.873739	6.42615	-7.34382	7.73237e-05	0.00124574	1.7156
Cul7	0.873565	6.3787	-9.94107	8.40041e-06	0.000280136	4.09808
Penk	0.873549	5.87125	-6.46388	0.000189008	0.00232396	0.750701
Orc6	0.872717	9.59134	-9.07947	1.65276e-05	0.000436443	3.37506
D430030G11Rik	0.871951	7.84637	-5.59541	0.000499194	0.00459514	-0.297682
Abcc4	0.871727	7.97248	-11.55	2.69315e-06	0.000141698	5.30311
Dhx34	0.868974	8.05674	-7.57715	6.18464e-05	0.00107039	1.95646
Rfc1	0.868641	9.01913	-11.7625	2.34232e-06	0.00012919	5.44986
Dctpp1	0.86831	9.46861	-6.62658	0.000159184	0.00206626	0.936162
C2cd5	0.867288	8.42398	-6.48713	0.00018439	0.00229191	0.777414
Smco4	0.867281	9.97563	-11.2821	3.2218e-06	0.000154023	5.11427
Tbc1d4	0.867114	9.68409	-11.8253	2.2487e-06	0.0001267	5.4927
Zfp946	0.866894	6.37179	-3.85153	0.00479667	0.023417	-2.72146
Tmem50b	0.865909	7.98896	-9.47888	1.19987e-05	0.00035039	3.71767
Asap1	0.865821	9.9593	-13.4737	8.22123e-07	7.09026e-05	6.5413
1700001D01Rik	0.864673	4.27528	-8.86297	1.97589e-05	0.000498445	3.18369
Sigirr	0.862359	9.8714	-11.8608	2.19768e-06	0.000124509	5.51679
Pou5f2	0.859821	7.11447	-5.3039	0.000706967	0.0058692	-0.672747
Dennd3	0.858609	5.42294	-6.72303	0.000143982	0.00192293	1.04455
Fam229b	0.857837	4.55028	-10.0764	7.58852e-06	0.000260256	4.20633
Ttc3	0.85734	8.38454	-7.5159	6.55468e-05	0.00111639	1.89381
Fbxo44	0.855436	5.61615	-6.53977	0.000174392	0.00220779	0.837617
Itgb1	0.855174	7.28601	-10.639	5.03421e-06	0.000200499	4.64229
Sec16b	0.853988	6.91568	-7.46017	6.91278e-05	0.00115451	1.83645
Ccdc61	0.853846	7.47968	-9.6937	1.0148e-05	0.000318235	3.89656
Tm4sf5	0.852596	5.42466	-3.26229	0.0113684	0.0436047	-3.62943
Scarb1	0.852543	6.9865	-7.63687	5.84605e-05	0.00103683	2.01715
1700019D03Rik	0.850861	6.04499	-8.27564	3.26857e-05	0.000699011	2.64316
2810039B14Rik	0.849579	4.90077	-8.46488	2.77059e-05	0.000618304	2.82083
Rnf170	0.848023	7.73886	-9.02578	1.72701e-05	0.000450301	3.32799
Zfp704	0.847679	5.10625	-6.56905	0.000169089	0.002162	0.870967
E230012J19Rik	0.847577	5.53057	-3.66752	0.00624882	0.0283383	-3.00117
Smyd4	0.846032	6.19446	-9.5613	1.12474e-05	0.000337993	3.78674
Orc1	0.845279	5.62686	-6.35643	0.000212066	0.00252555	0.626388
9630010G10Rik	0.844108	7.54154	-5.8762	0.000360879	0.00366763	0.0523684
Palb2	0.844088	6.7847	-9.12915	1.5872e-05	0.000423303	3.41841
Brd8	0.842822	8.30673	-7.96127	4.33119e-05	0.00085248	2.34026
9430082L08Rik	0.842219	5.30197	-4.07565	0.00349848	0.0186801	-2.38634
Fnta	0.841748	10.2451	-8.71697	2.23337e-05	0.000534389	3.05229
A630023P12Rik	0.841316	11.0808	-7.83271	4.87208e-05	0.000917115	2.21353
Vps26c	0.840816	8.50237	-10.3436	6.22919e-06	0.000228133	4.41624
Tcf19	0.839431	6.05265	-6.56746	0.000169372	0.00216427	0.86916
Baz2b	0.838763	6.78122	-6.34655	0.000214336	0.00254094	0.614887
Mcm5	0.838623	8.07538	-10.5032	5.54834e-06	0.000212162	4.53914
Osbpl7	0.838166	7.20277	-9.79657	9.3763e-06	0.000299842	3.98093
Ift43	0.837477	6.93842	-8.73396	2.20157e-05	0.000529952	3.06768
Zfp101	0.837097	7.294	-6.70351	0.000146925	0.00195034	1.0227
Fgfr1op	0.836344	9.17941	-8.71577	2.23563e-05	0.000534389	3.0512
9030622M22Rik	0.835766	5.74629	-3.81574	0.00504802	0.0242288	-2.77556
5033418A18Rik	0.835708	7.89493	-4.98397	0.00104991	0.0079106	-1.09832
Rasa1	0.834939	10.9089	-9.0599	1.6794e-05	0.000440392	3.35794
Cers4	0.834247	8.00485	-7.74198	5.29894e-05	0.000970321	2.12305
Cyb5r1	0.833402	9.21254	-9.21827	1.47673e-05	0.000400084	3.49564
5830407E08Rik	0.832758	8.35703	-3.17804	0.0129075	0.0473982	-3.76175
Ppil1	0.832693	8.75406	-8.21559	3.4468e-05	0.000728282	2.58606
Zfp418	0.832085	5.17456	-3.69294	0.00602296	0.0276033	-2.9623
Zfp53	0.832074	7.44652	-6.11987	0.000274573	0.00304061	0.347438
Pmvk	0.830849	8.82209	-7.4995	6.65788e-05	0.00112727	1.87696
Clip3	0.830707	4.22575	-7.33492	7.79933e-05	0.00125456	1.7063
Themis2	0.830177	6.3721	-4.55763	0.0018195	0.0117383	-1.68835
Gga2	0.829281	6.78674	-5.5936	0.000500255	0.00459818	-0.299971
D18Ertd169e	0.828098	5.15881	-4.21152	0.00289957	0.016473	-2.18635
Cpm	0.828014	6.49604	-5.76713	0.000408851	0.00402551	-0.0823197
Rassf7	0.827319	6.96023	-9.86502	8.89911e-06	0.000288785	4.03663
Chtf18	0.826513	7.20053	-10.5611	5.3223e-06	0.000206705	4.58327
Scn11a	0.826511	5.19956	-7.77944	5.11787e-05	0.000946461	2.16051
Lad1	0.826472	5.12984	-5.11506	0.000891292	0.0070117	-0.922167
Ift80	0.826396	7.49325	-11.5723	2.65373e-06	0.000141365	5.31862
3100003L13Rik	0.826143	5.11151	-5.12214	0.000883503	0.00696914	-0.912723
Lrmp	0.825377	10.2022	-11.1676	3.48239e-06	0.000162434	5.03219
Cdc14b	0.825117	6.63952	-7.02578	0.00010578	0.00156525	1.37745
Zfp40	0.824503	5.25584	-7.10689	9.75571e-05	0.00147915	1.46479
Rfc4	0.824307	9.27327	-10.6368	5.04205e-06	0.000200499	4.64064
Serpinb6a	0.824264	7.47937	-5.52387	0.000543121	0.00484299	-0.388623
Ccdc69	0.823945	7.75163	-10.2601	6.6223e-06	0.000237442	4.3512
C630016I17Rik	0.823849	5.83718	-4.08513	0.00345264	0.0185222	-2.37231
2310058N22Rik	0.821447	10.0555	-4.17066	0.00306714	0.0171121	-2.24623
Zfp41	0.821127	5.99826	-6.06984	0.000290244	0.00316581	0.287507
Kpna2	0.821024	9.57299	-10.1063	7.42079e-06	0.000256479	4.23012
Il1r2	0.820673	4.63314	-7.46679	6.8691e-05	0.00114815	1.84328
Gm19816	0.819862	6.59337	-3.97764	0.00401267	0.0205483	-2.53212
Eme1	0.819181	6.43282	-7.89702	4.59269e-05	0.000880295	2.27714
Pkn1	0.819139	6.50918	-8.07708	3.90057e-05	0.000790897	2.45299
D730035F11Rik	0.817583	8.24439	-3.60882	0.00680561	0.0300293	-3.0912
Bag3	0.814528	6.32191	-5.56884	0.000515034	0.00467476	-0.33137
Arhgap25	0.814064	8.06512	-10.8322	4.39164e-06	0.000187252	4.78694
Pmel	0.813984	7.65979	-6.10147	0.000280225	0.00308323	0.325436
Rbak	0.81308	9.34834	-10.4224	5.88229e-06	0.000220146	4.4771
Cpt2	0.811275	5.72226	-4.9637	0.00107708	0.00804726	-1.12577
Scly	0.810881	7.25053	-8.68154	2.30134e-05	0.000543832	3.02011
Zfp52	0.81001	8.16154	-5.66179	0.000461903	0.00436552	-0.213944
Slc25a4	0.809982	8.84431	-10.7914	4.51931e-06	0.000190549	4.7566
Maf	0.80982	10.2008	-10.7723	4.58042e-06	0.000192035	4.74238
Wdr62	0.809768	4.72955	-5.47977	0.000572298	0.00503745	-0.445036
Kifc5b	0.808452	5.26652	-4.94077	0.00110874	0.00823881	-1.15691
BC030867	0.808447	6.65333	-8.4878	2.71623e-05	0.000612839	2.84212
Incenp	0.807935	6.24424	-6.73759	0.00014183	0.00189993	1.06081
1700010I14Rik	0.807564	6.46013	-9.19169	1.50876e-05	0.000408221	3.47267
Lrp10	0.806523	10.6358	-8.63243	2.3994e-05	0.000560471	2.97532
Fabp7	0.805459	4.99115	-4.79297	0.0013388	0.00940004	-1.35942
Nde1	0.804859	9.51842	-9.65794	1.04327e-05	0.000324609	3.86703
Rdh12	0.80482	6.78317	-11.6536	2.51532e-06	0.000135754	5.37497
Arhgap33	0.804333	4.37464	-8.07618	3.90373e-05	0.000790897	2.45212
Bcat1	0.804243	5.82496	-8.38977	2.95736e-05	0.000647305	2.75073
Raph1	0.803692	8.49967	-8.17135	3.58502e-05	0.000746448	2.54376
DXErtd223e	0.803526	7.53115	-3.85044	0.00480415	0.0234434	-2.72311
Ddx28	0.803212	8.69627	-7.80951	4.97748e-05	0.000928028	2.19048
Acsf3	0.803129	6.5947	-8.69299	2.27911e-05	0.000540374	3.03053
Tedc2	0.801255	5.94052	-7.33148	7.82545e-05	0.00125604	1.70269
Cnrip1	0.800428	6.42174	-8.25218	3.33696e-05	0.000709199	2.62089
Shkbp1	0.799497	10.7339	-8.78281	2.1129e-05	0.000517229	3.11178
Btk	0.798543	4.96804	-6.84143	0.000127473	0.00178041	1.17605
Adcy9	0.798424	5.68519	-7.30428	8.03499e-05	0.00127942	1.67418
Rnaseh2b	0.798188	9.92693	-6.0366	0.0003012	0.00324951	0.247502
Kif18a	0.797695	4.42526	-8.74349	2.18395e-05	0.000527428	3.0763
Mns1	0.796357	8.08433	-8.59898	2.46884e-05	0.000572776	2.94469
St6galnac1	0.796098	5.52425	-11.7008	2.43871e-06	0.000132667	5.40748
Cybb	0.795915	4.62319	-7.42924	7.12084e-05	0.00117208	1.80447
Mex3b	0.795247	8.7235	-6.46191	0.000189405	0.00232745	0.748433
Gpx8	0.795131	4.00251	-4.45116	0.00209601	0.0130067	-1.83976
Phactr2	0.795108	6.68103	-9.36462	1.31342e-05	0.000371032	3.62101
AI480526	0.794644	8.35219	-4.01453	0.00381016	0.0198533	-2.4771
Hesx1	0.794603	5.3311	-3.78852	0.00524857	0.0249346	-2.81681
6720489N17Rik	0.794318	4.14569	-10.2197	6.8225e-06	0.000243555	4.31954
Lims1	0.794154	8.06689	-11.6071	2.59352e-06	0.000139242	5.34277
Jazf1	0.794084	7.15039	-7.61914	5.94439e-05	0.00104304	1.99917
Rab33a	0.793869	4.27253	-3.23626	0.0118222	0.0446639	-3.67026
Slc26a11	0.79344	8.60911	-5.29463	0.000714971	0.00591741	-0.684872
Arhgef11	0.79102	5.77108	-8.25716	3.32232e-05	0.00070682	2.62562
Accs	0.790812	8.78004	-8.58073	2.50767e-05	0.000578514	2.92793
AW046457	0.790374	5.87724	-6.46724	0.000188332	0.00231704	0.754569
Ncoa7	0.788509	8.12467	-8.03623	4.04678e-05	0.000810501	2.41339
Plxdc1	0.787962	5.33505	-6.37401	0.000208091	0.00249158	0.646823
2610027H17Rik	0.787561	4.91755	-3.78584	0.00526877	0.0249895	-2.82087
Gm16386	0.787516	3.63756	-4.80361	0.00132061	0.00931373	-1.34473
S100a6	0.78742	11.606	-7.64454	5.80407e-05	0.00103093	2.02492
Blmh	0.787155	10.1835	-8.85128	1.99524e-05	0.000500248	3.17324
Prkca	0.78706	8.78364	-8.54592	2.58362e-05	0.000592702	2.89588
Hhex	0.786654	7.14239	-5.64152	0.000472959	0.00443678	-0.239456
Nup37	0.786584	8.12491	-7.58403	6.14457e-05	0.00106615	1.96347
Arc	0.786431	6.40705	-3.83288	0.00492593	0.023865	-2.74963
Akr1b8	0.786386	4.76954	-4.16184	0.00310466	0.0172324	-2.25919
Paox	0.785972	7.17802	-6.29495	0.000226644	0.00265159	0.55459
Zfp251	0.785226	10.7129	-7.92616	4.47196e-05	0.000866876	2.30583
Mlf1	0.78378	4.53609	-4.32546	0.00248234	0.0147475	-2.02056
1500009L16Rik	0.782867	5.04205	-5.86648	0.000364895	0.00370476	0.0404266
Fcgr2b	0.781801	4.71897	-11.0868	3.68064e-06	0.000168584	4.97372
Prkar2b	0.781359	6.11903	-4.34008	0.0024337	0.0145434	-1.99943
Pqlc3	0.780926	8.6494	-11.0077	3.8868e-06	0.000173292	4.91613
Patj	0.780753	5.98323	-7.42101	7.17737e-05	0.00117949	1.79594
Gdpd3	0.779738	6.27736	-7.91427	4.52078e-05	0.000874995	2.29413
Matk	0.779351	6.15787	-9.37119	1.30658e-05	0.000371006	3.6266
Ccdc18	0.779172	3.48912	-6.02101	0.000306497	0.00329624	0.228684
Ermp1	0.779118	6.74909	-8.95024	1.83786e-05	0.000471749	3.26132
2010004M13Rik	0.778787	7.63701	-5.54262	0.00053121	0.00477623	-0.364714
AI451458	0.778307	8.17857	-5.0875	0.000922324	0.00717873	-0.958987
St8sia1	0.777985	6.7621	-8.84843	1.99998e-05	0.000500701	3.17069
C79256	0.777752	4.07842	-5.38523	0.000640806	0.0054714	-0.566894
Gemin6	0.776693	7.23751	-5.85765	0.000368583	0.00373605	0.0295714
Bclaf3	0.776473	9.01469	-7.66138	5.71308e-05	0.00102257	2.04195
Rapgef5	0.775995	4.36619	-11.295	3.19383e-06	0.000153447	5.12347
8430408J09Rik	0.775522	7.31368	-4.53993	0.0018626	0.0119211	-1.71341
C430042M11Rik	0.775296	4.83136	-9.77305	9.54678e-06	0.000302153	3.96172
Mcm6	0.775119	8.48214	-10.7456	4.66767e-06	0.000193002	4.7224
Zfp426	0.775015	6.32841	-3.62908	0.00660773	0.0294432	-3.06009
Xrcc3	0.774482	7.08574	-9.65626	1.04462e-05	0.000324609	3.86565
Pla2g4c	0.774112	4.99708	-6.26032	0.000235339	0.00271679	0.513936
Krba1	0.77408	6.98267	-6.58064	0.00016704	0.00214516	0.884136
Cd4	0.77346	9.98439	-8.43702	2.8383e-05	0.000627271	2.79489
Rgl2	0.77152	8.992	-5.64525	0.000470899	0.00442809	-0.234749
Zfp365	0.771154	4.55586	-9.86667	8.88791e-06	0.000288785	4.03797
Sv2a	0.769744	5.39304	-7.49717	6.67268e-05	0.00112727	1.87457
Ccdc66	0.76934	8.28378	-8.13144	3.71503e-05	0.000764286	2.50544
Sypl	0.768761	7.63912	-11.3553	3.06676e-06	0.000151298	5.16628
Hexb	0.768003	9.8182	-10.3592	6.15869e-06	0.000226766	4.42833
Trpv2	0.767716	8.86442	-9.54783	1.13665e-05	0.000339819	3.77549
Ttc39c	0.767333	6.90278	-8.37388	2.99866e-05	0.000653555	2.73582
Map4	0.765731	7.82593	-9.43931	1.2379e-05	0.000357578	3.68432
Kif5c	0.764604	5.36552	-7.60614	6.01763e-05	0.00105124	1.98597
Morn2	0.763949	6.41366	-7.17713	9.10056e-05	0.00139599	1.53981
Cd9	0.763136	8.85779	-4.9506	0.00109505	0.00816668	-1.14356
Eldr	0.762718	3.90154	-7.89459	4.60291e-05	0.000880608	2.27474
LOC102634389	0.762582	5.83897	-5.83332	0.000378961	0.00380646	-0.000395647
Fbn2	0.762428	3.67143	-9.5358	1.14741e-05	0.000341846	3.76543
Slc12a9	0.760687	6.6289	-4.59623	0.00172926	0.011338	-1.63386
AU022245	0.760286	3.00468	-6.06902	0.000290509	0.00316581	0.286523
Cdca3	0.759839	4.36872	-8.89078	1.9307e-05	0.000489452	3.2085
2700099C18Rik	0.75981	7.59891	-5.59331	0.000500427	0.00459818	-0.300342
Mbd4	0.759534	6.2663	-9.57545	1.11239e-05	0.000336489	3.79854
Ctsg	0.759398	3.57167	-9.27855	1.40687e-05	0.000387296	3.5475
Nmral1	0.75855	5.68857	-8.68002	2.3043e-05	0.000543832	3.01873
Arap3	0.757683	6.52052	-7.71745	5.42133e-05	0.000984818	2.09844
Rtkn2	0.757197	4.1218	-6.91475	0.000118306	0.00169911	1.25663
Acbd5	0.755522	8.081	-6.35853	0.000211588	0.00252396	0.628827
Ptpn11	0.755274	8.61267	-8.23393	3.39126e-05	0.000719249	2.60353
Szt2	0.755092	9.04646	-7.41594	7.21241e-05	0.0011843	1.79068
Vamp5	0.754311	6.85223	-5.97082	0.000324252	0.00342259	0.167889
Atp9b	0.754289	7.91984	-7.30653	8.01737e-05	0.0012786	1.67655
Atpif1	0.754194	6.45325	-8.21518	3.44806e-05	0.000728282	2.58567
Mtm1	0.753635	8.86869	-11.0593	3.75085e-06	0.000169177	4.95375
Ccp110	0.753348	7.89045	-9.24764	1.44222e-05	0.000394645	3.52095
Nt5dc2	0.753018	5.75613	-7.94087	4.41238e-05	0.000862043	2.32027
Ckap5	0.75253	6.61687	-8.10934	3.78923e-05	0.000777134	2.48416
Ccdc120	0.752233	3.93987	-7.0521	0.00010303	0.00153453	1.40587
Arl3	0.751883	10.3038	-7.38199	7.45216e-05	0.00121221	1.75541
Usp11	0.751313	8.21362	-7.41452	7.22226e-05	0.00118497	1.78921
Mms22l	0.7506	7.50668	-7.24963	8.47506e-05	0.00132875	1.61665
Snx8	0.749804	7.19654	-8.42596	2.86569e-05	0.00063085	2.78457
AA408251	0.749687	4.14636	-8.75295	2.16661e-05	0.000524616	3.08485
Alpl	0.749431	6.05481	-4.42919	0.00215855	0.0132624	-1.87121
Caskin2	0.748962	6.5295	-7.90538	4.55769e-05	0.000878169	2.28538
Irf6	0.74777	4.82349	-3.87478	0.0046406	0.0228619	-2.6864
Gtse1	0.747758	6.3906	-10.6189	5.10694e-06	0.000202061	4.62708
Rcc1	0.74668	8.63081	-7.06918	0.000101289	0.0015163	1.42427
E130110O22Rik	0.7462	5.94212	-4.2251	0.0028461	0.0162819	-2.1665
Art2a	0.745605	8.97799	-4.93481	0.00111714	0.00828619	-1.16502
Lncpint	0.74369	7.62912	-3.3684	0.00969981	0.0388087	-3.4635
Nap1l3	0.743125	4.5817	-3.72354	0.00576254	0.0267143	-2.91561
Ptprf	0.743009	5.78001	-7.9566	4.34962e-05	0.000854467	2.33569
A430061O12Rik	0.742845	8.07415	-3.38836	0.00941593	0.0381266	-3.43239
Zfp563	0.741788	6.11208	-3.1811	0.012848	0.0472813	-3.75694
Cdc7	0.741756	8.02184	-6.55814	0.000171044	0.00217614	0.858555
Tspan32	0.741581	9.14468	-6.82832	0.000129194	0.00179272	1.16157
Rbm43	0.740282	10.0355	-7.12007	9.62892e-05	0.00146825	1.47891
Dpp7	0.740118	6.85985	-9.87629	8.82313e-06	0.000288143	4.04576
Slc36a4	0.738425	9.76542	-9.18088	1.522e-05	0.000409105	3.46332
7030407E18Rik	0.738363	7.84751	-3.63715	0.00653052	0.0292414	-3.04769
Oaf	0.737764	5.32351	-6.5408	0.000174203	0.00220675	0.838793
Stard6	0.737686	6.84829	-6.84789	0.000126634	0.001774	1.18318
Tbc1d19	0.737572	7.02386	-8.69818	2.26914e-05	0.000539166	3.03524
Rhebl1	0.737306	5.7657	-6.3623	0.00021073	0.0025171	0.633212
2810408I11Rik	0.737068	5.53273	-6.63594	0.000157634	0.00205265	0.946725
Cttn	0.736886	4.98966	-8.9842	1.78709e-05	0.000461604	3.29135
D230040J21Rik	0.736588	7.94779	-5.17365	0.000829028	0.00664421	-0.844235
Gas2	0.736216	5.55854	-4.58904	0.00174568	0.0113984	-1.64399
C77648	0.736044	7.04723	-4.81018	0.00130952	0.00927573	-1.33568
Cnga1	0.735481	6.27409	-5.37239	0.000650782	0.00552895	-0.583539
Mcoln2	0.735289	6.59817	-7.1511	9.3375e-05	0.00142806	1.51208
Akr1b10	0.735251	8.54121	-4.51137	0.00193446	0.0122412	-1.75394
9130413E14Rik	0.735065	7.34631	-6.68555	0.000149691	0.00197301	1.00256
Mfge8	0.734812	7.29775	-10.6151	5.12085e-06	0.000202061	4.62419
4932439E07Rik	0.734339	4.00693	-8.13943	3.68856e-05	0.000761054	2.51313
Ocrl	0.733002	5.92984	-5.65231	0.000467038	0.00439985	-0.225867
Rfc3	0.732866	7.59168	-5.51962	0.000545856	0.00485682	-0.39404
D2Ertd640e	0.732736	8.05363	-3.95044	0.00416931	0.0211285	-2.57279
Trim68	0.732544	8.69541	-6.56376	0.000170035	0.00217004	0.864942
Arhgap19	0.731031	5.80815	-8.81038	2.06462e-05	0.000511393	3.13658
Tsen2	0.730678	6.4541	-7.54435	6.37984e-05	0.0010931	1.92296
Adamtsl2	0.729679	5.29592	-9.51623	1.16516e-05	0.00034383	3.74904
Oip5	0.729242	5.89523	-8.35484	3.04898e-05	0.000661709	2.71793
Lair1	0.728829	5.47077	-8.1959	3.50757e-05	0.000736301	2.56726
Fah	0.728051	7.24234	-7.06982	0.000101224	0.0015163	1.42497
Apobec1	0.727771	7.61011	-4.92245	0.00113476	0.00838342	-1.18184
Tmem198b	0.72731	7.53123	-9.35599	1.32247e-05	0.00037205	3.61367
Ube4bos1	0.726819	4.93358	-3.62842	0.00661408	0.0294517	-3.0611
Iqcc	0.726679	5.35612	-6.82243	0.000129975	0.00179869	1.15506
Rasl11a	0.726512	4.73787	-8.83433	2.02368e-05	0.000504297	3.15806
Gpr19	0.72628	5.21912	-6.32664	0.000218996	0.00258423	0.591662
Gzf1	0.726218	8.25363	-5.14185	0.000862203	0.0068565	-0.886463
Pms1	0.725641	7.876	-6.5952	0.000164504	0.00211923	0.900654
Psmc3ip	0.725384	7.81894	-7.67695	5.63035e-05	0.00101203	2.05767
Gm5544	0.724745	4.05219	-9.79115	9.41529e-06	0.000299842	3.97651
Zfp280b	0.723557	8.78558	-6.38072	0.000206594	0.00247918	0.654618
Tmem81	0.723469	7.05216	-6.0864	0.000284951	0.00312016	0.307381
Eif4enif1	0.723027	9.41331	-9.41111	1.26583e-05	0.000363598	3.66047
Zfp839	0.723017	6.00418	-4.08355	0.00346026	0.0185437	-2.37465
Ppwd1	0.722994	6.46463	-7.55765	6.29989e-05	0.00108484	1.93655
Ass1	0.722063	4.77423	-4.4899	0.00199047	0.012484	-1.78449
D430033H22Rik	0.720737	7.78069	-4.41663	0.0021952	0.0134192	-1.88921
Tnfrsf13b	0.720195	8.27446	-7.08185	0.000100017	0.00150496	1.43791
Taf6	0.719102	7.21064	-8.724	2.22015e-05	0.00053255	3.05866
Gm17586	0.719096	6.85563	-7.87505	4.68607e-05	0.000890501	2.25546
Cenpv	0.718807	7.26284	-7.00081	0.000108463	0.00159117	1.35041
Ttc13	0.718735	10.6171	-7.81044	4.97319e-05	0.000928028	2.19141
Rnf215	0.718669	8.26425	-6.67366	0.000151553	0.00198988	0.989211
Osbpl3	0.718504	6.84485	-9.77927	9.50139e-06	0.000301647	3.9668
Carns1	0.71848	8.45189	-5.31636	0.000696359	0.00581499	-0.656462
Lrwd1	0.718265	10.1156	-8.2073	3.47225e-05	0.000730489	2.57814
Prg4	0.717973	4.99074	-5.61824	0.000486007	0.00451428	-0.26881
Nfia	0.717248	5.89719	-7.73184	5.34915e-05	0.000977129	2.11289
Med18	0.717039	5.21235	-4.03662	0.00369422	0.0194518	-2.44425
Mastl	0.716758	5.76239	-9.60963	1.08314e-05	0.000330657	3.82699
AW555355	0.71659	7.54525	-3.65624	0.00635189	0.0287193	-3.01843
Tln1	0.715152	8.2771	-7.81679	4.94414e-05	0.000923742	2.19771
Rfc5	0.713554	8.35234	-6.63026	0.000158573	0.00206225	0.940313
Slc5a3	0.713496	7.68938	-3.38476	0.00946654	0.0382322	-3.43801
4930402H24Rik	0.713371	5.60589	-9.89308	8.71133e-06	0.000286315	4.05936
5530402H23Rik	0.713329	5.52868	-3.98218	0.00398709	0.0204582	-2.52533
Smc4	0.713134	11.3347	-9.88645	8.75533e-06	0.000287202	4.05399
Cks2	0.713084	11.4003	-7.51785	6.54254e-05	0.00111539	1.89581
Nipsnap1	0.711972	8.62176	-8.65163	2.36052e-05	0.000553912	2.99286
Tmem131l	0.711929	8.4306	-4.21983	0.00286673	0.0163498	-2.1742
Plxnb1	0.711731	4.92883	-5.59218	0.000501094	0.00459818	-0.30178
Ccdc157	0.710685	8.16633	-5.72392	0.000429759	0.00418316	-0.136129
Miga1	0.710539	6.7951	-7.21433	8.77341e-05	0.00136236	1.57932
Zfp27	0.710501	5.39803	-3.20992	0.0123009	0.0457942	-3.71163
C80258	0.709069	8.16544	-3.837	0.00489706	0.0237572	-2.74341
Batf	0.709066	9.9913	-3.64022	0.00650151	0.0291574	-3.043
Orc5	0.708134	8.61052	-10.2158	6.84233e-06	0.000243627	4.31645
Ccar2	0.707771	8.81453	-9.18759	1.51377e-05	0.000408498	3.46913
Arhgef6	0.70777	9.26862	-5.62756	0.000480736	0.00448155	-0.257048
Txlnb	0.707712	5.75352	-7.92665	4.46996e-05	0.000866876	2.30631
Sirt4	0.707656	7.71659	-8.46712	2.76523e-05	0.000618304	2.82291
Sass6	0.707456	6.44893	-6.69001	0.000148998	0.00196894	1.00757
Tspan5	0.707087	9.70612	-7.38946	7.39869e-05	0.00120716	1.76318
Spint2	0.706122	10.1216	-8.26277	3.30589e-05	0.000704788	2.63095
Msantd4	0.706105	7.72133	-5.15435	0.000848989	0.00677243	-0.869842
Tada2a	0.706011	8.38787	-7.64796	5.78544e-05	0.00103093	2.02839
Ccne2	0.705555	7.18266	-5.24968	0.000755208	0.00618306	-0.743834
Gm9885	0.705159	4.90131	-8.85883	1.98272e-05	0.00049894	3.17999
Pear1	0.704789	7.69802	-8.14325	3.67599e-05	0.000761015	2.5168
Pgap1	0.704688	4.71042	-6.47054	0.000187672	0.00231283	0.758361
Fam241b	0.704306	6.62209	-5.52922	0.000539692	0.00482289	-0.381795
Ankrd52	0.70375	8.13073	-4.17605	0.00304446	0.0170182	-2.23832
Ydjc	0.703731	6.70218	-5.99007	0.00031731	0.00336664	0.191251
Dctd	0.703118	6.74772	-4.90138	0.00116552	0.00855311	-1.21058
Cep135	0.701642	8.24341	-5.99521	0.000315486	0.00335899	0.197478
Tti1	0.701101	8.06462	-7.52085	6.52386e-05	0.00111313	1.89889
Ptprc	0.701028	11.5554	-6.83473	0.00012835	0.00178463	1.16865
Nemp2	0.700514	11.391	-9.37227	1.30545e-05	0.000371006	3.62752
Ripor2	0.699035	9.17257	-8.84727	2.00192e-05	0.000500701	3.16965
Zfp820	0.698584	3.42611	-4.84919	0.00124568	0.00896412	-1.28202
Inf2	0.697651	7.21401	-8.77877	2.12008e-05	0.000517229	3.10814
Capg	0.697403	7.3813	-4.93883	0.00111147	0.00825608	-1.15955
Ndc1	0.69676	6.49621	-6.15262	0.000264819	0.00296256	0.386493
Pde8b	0.696165	5.27551	-6.09626	0.00028185	0.00309613	0.319193
BB211804	0.695154	4.30031	-8.62489	2.41485e-05	0.000563088	2.96843
Rfwd3	0.694571	9.42997	-9.37714	1.3004e-05	0.000370417	3.63166
Tubb4a	0.694393	5.32019	-5.47662	0.000574448	0.00504555	-0.449078
1700028E10Rik	0.694176	4.72521	-5.45499	0.00058944	0.00515734	-0.476847
Msh6	0.693777	10.3758	-7.08983	9.92258e-05	0.00149834	1.44648
Hsdl1	0.693622	9.52746	-6.28444	0.000229244	0.00267895	0.542273
Gnptab	0.693586	7.29798	-7.62938	5.88738e-05	0.0010409	2.00956
9530036M11Rik	0.693537	5.73947	-3.57576	0.00714218	0.0311062	-3.14205
Zfp82	0.693213	5.99194	-5.95444	0.000330286	0.00347152	0.147986
Plekhg3	0.691366	6.37977	-8.27858	3.26011e-05	0.00069793	2.64594
Sall2	0.691201	7.0672	-5.39544	0.00063299	0.00542499	-0.55367
Pon3	0.691189	5.55127	-5.57933	0.000508714	0.00464111	-0.318054
6030487A22Rik	0.690718	7.6125	-4.72123	0.00146878	0.0100915	-1.45884
Dars2	0.690477	6.93451	-6.24505	0.00023929	0.00275244	0.495958
Pan2	0.689726	9.01042	-7.83133	4.87831e-05	0.000917115	2.21215
2610524H06Rik	0.689123	8.56744	-5.13926	0.00086497	0.00687052	-0.88991
Ppip5k1	0.689119	7.03198	-9.11256	1.60876e-05	0.000428494	3.40396
Cenpn	0.689118	6.86822	-5.20307	0.000799568	0.00645604	-0.805288
A630014C17Rik	0.688974	5.30787	-5.51989	0.000545682	0.00485682	-0.393694
Dus2	0.687009	6.0941	-6.45276	0.00019126	0.00234182	0.737909
Cisd1	0.686914	7.63782	-6.64781	0.000155691	0.0020325	0.96012
Rnpep	0.686313	8.69267	-7.80519	4.9974e-05	0.000930052	2.18617
Zfp157	0.686177	6.35872	-6.19491	0.000252783	0.00286427	0.436721
Otud7b	0.685803	9.36056	-8.08111	3.88645e-05	0.000789963	2.45689
1110004M10Rik	0.685684	6.37763	-3.18425	0.0127869	0.0471074	-3.75198
Il3ra	0.685613	7.50287	-5.3532	0.000666018	0.00563738	-0.608472
C920008N22Rik	0.685009	5.23179	-3.58456	0.00705095	0.0308201	-3.12851
Mpp4	0.684824	4.75081	-3.70578	0.00591214	0.0272354	-2.94269
Trpm4	0.684793	7.05684	-6.74329	0.000140997	0.00189248	1.06717
Insm1	0.68433	4.16692	-5.44935	0.000593425	0.00518117	-0.484111
Gemin2	0.683529	8.46796	-8.97932	1.79427e-05	0.000462296	3.28705
Tubb2a	0.683379	8.34531	-6.04937	0.000296941	0.0032205	0.262879
Zfyve19	0.68324	8.23843	-8.77351	2.12946e-05	0.000518068	3.1034
Smo	0.682995	3.67062	-6.81247	0.000131308	0.00181103	1.14405
Dstn	0.682401	9.28629	-4.85857	0.00123085	0.00888853	-1.26915
Nudt6	0.681734	7.13173	-5.07819	0.000933083	0.00724851	-0.971462
Spopl	0.68127	7.65618	-5.91655	0.000344733	0.00356717	0.101774
C79246	0.681224	4.90244	-6.69256	0.000148603	0.00196499	1.01044
1810055G02Rik	0.681142	5.99413	-7.32847	7.84834e-05	0.0012585	1.69954
Gm4354	0.680964	10.214	-5.69712	0.000443315	0.00426806	-0.169634
Mfsd4a	0.680962	5.09963	-5.18099	0.000821563	0.00659986	-0.834499
Dtnb	0.680839	7.74785	-6.14068	0.00026833	0.00298762	0.37227
Snx2	0.680592	11.3363	-9.50821	1.17251e-05	0.000345503	3.74232
Magi2	0.67961	5.91025	-5.38754	0.000639027	0.00545848	-0.563897
Rbm5	0.67857	9.10919	-6.78914	0.000134491	0.00182942	1.11818
Srrt	0.676831	10.5673	-8.03092	4.06622e-05	0.000813416	2.40823
4930558J18Rik	0.67646	4.23169	-5.01037	0.00101565	0.00771353	-1.06265
Jdp2	0.675346	6.30966	-7.055	0.000102732	0.0015312	1.409
Gm19569	0.675227	4.95773	-3.95777	0.00412648	0.0209948	-2.56182
Slc46a1	0.674945	6.23543	-8.08263	3.88116e-05	0.000789963	2.45836
Cdc14a	0.674697	8.01105	-5.02859	0.000992705	0.00757982	-1.03808
Dcun1d4	0.673223	8.00473	-5.90212	0.000350412	0.0035987	0.0841364
Nt5e	0.673208	7.74403	-8.78375	2.11123e-05	0.000517229	3.11263
Fcho1	0.672871	8.14309	-6.71343	0.000145421	0.00193543	1.03381
Kif15	0.671933	4.72936	-4.42054	0.00218372	0.0133769	-1.8836
G2e3	0.671927	7.28723	-6.1759	0.000258118	0.00290865	0.414168
Gm26782	0.671863	6.34065	-7.9569	4.34843e-05	0.000854467	2.33599
B3gat3	0.671838	7.00405	-5.52674	0.000541278	0.00483496	-0.384959
Dnah11	0.671771	9.46657	-8.78023	2.11749e-05	0.000517229	3.10945
Naxd	0.669678	8.96511	-6.2142	0.000247494	0.00282169	0.459552
Lacc1	0.668921	4.3684	-6.31144	0.000222628	0.00261805	0.573897
Dusp22	0.668852	7.33242	-7.30555	8.02507e-05	0.00127884	1.67551
Rbm44	0.668676	4.17579	-5.5656	0.000517005	0.00468549	-0.335489
Pygb	0.668112	9.81735	-7.90266	4.56904e-05	0.000878224	2.2827
5430434F05Rik	0.667916	8.03354	-5.1701	0.000832664	0.00666293	-0.848945
Msh3	0.666849	6.0959	-6.12172	0.000274012	0.00303605	0.349644
BC064078	0.666736	7.52624	-7.06615	0.000101595	0.00151978	1.42101
Pot1a	0.666322	6.15463	-6.69721	0.000147888	0.00196059	1.01565
A630057N01Rik	0.665028	7.62312	-3.31858	0.0104486	0.040981	-3.5413
D7Ertd183e	0.664141	9.54705	-3.45877	0.00848272	0.0352394	-3.32292
D3Ertd740e	0.664136	7.50968	-4.14284	0.0031872	0.0175245	-2.28714
Cntrob	0.6635	7.25266	-6.35595	0.000212176	0.00252555	0.625827
Wdr11	0.662992	8.87816	-7.53548	6.43379e-05	0.00110045	1.91388
Tmem165	0.662665	9.12225	-7.28794	8.1638e-05	0.00128892	1.65702
Tmem163	0.662429	5.77628	-6.87286	0.00012345	0.00174972	1.21067
AA408213	0.66144	4.39925	-6.76149	0.000138374	0.00186459	1.08745
Stimate	0.661403	6.557	-7.19867	8.90952e-05	0.00137328	1.56271
Aifm1	0.661152	9.80022	-8.83902	2.01576e-05	0.000502936	3.16226
Ankle1	0.661132	5.48645	-5.74821	0.000417866	0.00408291	-0.105852
Ddx11	0.660645	8.82111	-9.28651	1.39793e-05	0.00038535	3.55432
Cdca7l	0.660587	9.00766	-8.99739	1.76777e-05	0.000457768	3.30299
Ttf2	0.66044	7.06966	-10.2648	6.5994e-06	0.000237035	4.35489
Fmnl3	0.660168	9.17454	-4.5637	0.00180497	0.0116858	-1.67976
Pqlc2	0.66014	7.22039	-7.40979	7.25518e-05	0.00118752	1.78431
Tmem101	0.659582	9.0919	-8.2649	3.29969e-05	0.000704196	2.63297
Zmym1	0.659087	8.97374	-7.88576	4.64031e-05	0.000886271	2.26603
Cdca7	0.657249	5.53426	-5.09365	0.000915296	0.00714617	-0.950758
A930012O16Rik	0.656895	6.81692	-4.85489	0.00123664	0.00892095	-1.2742
Dnph1	0.655779	5.10118	-5.42747	0.000609147	0.00527799	-0.512293
6430590A07Rik	0.655666	6.03565	-3.58986	0.00699652	0.030654	-3.12035
Cmah	0.655348	5.98615	-7.21052	8.80635e-05	0.0013639	1.57528
Kif14	0.654256	4.00051	-7.25195	8.45585e-05	0.00132788	1.6191
Padi3	0.654226	4.72035	-4.28311	0.00262932	0.0153326	-2.08198
Arhgap30	0.653676	9.99719	-6.16128	0.000262305	0.00294289	0.396794
Cep152	0.65224	8.04211	-7.84493	4.81759e-05	0.00090896	2.22565
6430501K19Rik	0.652236	6.11972	-3.54996	0.00741724	0.0319379	-3.18183
Trps1	0.651587	8.26284	-7.60504	6.02386e-05	0.00105143	1.98486
Pola2	0.650679	6.23021	-4.45048	0.00209791	0.0130138	-1.84073
Apc	0.650398	9.10716	-7.46927	6.85283e-05	0.0011473	1.84584
Tmem107	0.650338	4.39843	-6.06696	0.000291177	0.00317082	0.284043
3110027N22Rik	0.650266	2.96878	-3.721	0.00578372	0.0267825	-2.91948
Tnni3	0.650219	4.45212	-4.72762	0.00145667	0.0100318	-1.44996
Myo7a	0.648705	7.15181	-9.4053	1.27167e-05	0.000364306	3.65555
2010003K10Rik	0.648248	4.43757	-4.87647	0.00120305	0.00873393	-1.24462
B3gnt2	0.648087	9.40884	-6.90426	0.000119571	0.00171368	1.24515
Nelfcd	0.647888	8.7797	-7.24026	8.55309e-05	0.00133803	1.60676
Cenpa	0.64747	7.85604	-4.25609	0.002728	0.0157292	-2.12129
Psrc1	0.64566	4.8165	-6.9082	0.000119094	0.00170804	1.24946
Cnn3	0.645598	4.92479	-3.82456	0.00498481	0.0240889	-2.76222
Pold3	0.645292	8.54336	-9.38293	1.29445e-05	0.000369232	3.63657
D2Ertd93e	0.644545	9.108	-3.4351	0.00878502	0.0361809	-3.35967
Btla	0.644401	11.1667	-6.89399	0.000120825	0.00172323	1.23388
8430437B07Rik	0.644004	5.23488	-6.23239	0.000242619	0.00278137	0.481036
Haus4	0.643831	8.00993	-7.2273	8.66245e-05	0.00134999	1.59305
Rom1	0.643421	6.11238	-4.32455	0.00248542	0.0147562	-2.02189
Tsen15	0.643415	8.7	-5.40863	0.00062305	0.00535321	-0.536613
Camk2d	0.64283	6.57175	-4.83834	0.00126309	0.00904809	-1.29692
Rdh5	0.641888	6.04343	-5.04272	0.000975311	0.00747306	-1.01907
Cenpm	0.640089	6.85606	-4.97495	0.00106191	0.00797465	-1.11053
Cdkn2c	0.640049	7.21609	-7.04884	0.000103366	0.00153842	1.40236
Aurka	0.640042	5.65062	-6.23132	0.000242904	0.00278308	0.479771
Gm7969	0.638049	2.95838	-6.78062	0.000135674	0.00183909	1.10873
A430106A12Rik	0.637835	7.49158	-5.69509	0.000444357	0.00426806	-0.172168
9430013L17Rik	0.637132	4.73769	-5.67319	0.000455812	0.00433793	-0.199623
Fubp3	0.636859	10.3557	-8.59548	2.47623e-05	0.000573194	2.94148
Cdc25a	0.63666	7.45321	-5.02034	0.00100302	0.00764435	-1.04919
Trav12n-2	0.636525	10.0744	-4.20373	0.00293074	0.0165903	-2.19775
Mlh1	0.636347	8.41392	-8.36631	3.01854e-05	0.000657189	2.72872
Aplp1	0.635871	8.15294	-5.90627	0.000348769	0.00359442	0.089212
Dpy19l4	0.635408	8.70323	-7.00372	0.000108146	0.00158767	1.35356
Zranb3	0.63469	6.02324	-8.86116	1.97887e-05	0.000498583	3.18207
Zmym5	0.634227	8.81069	-5.33799	0.000678368	0.00571361	-0.628265
Rangrf	0.634112	7.10395	-5.53787	0.0005342	0.0047925	-0.370767
Usp4	0.633777	9.61992	-5.31893	0.000694196	0.00579929	-0.653111
Nsmaf	0.633022	10.0203	-4.02121	0.00377471	0.0197268	-2.46716
Lamc1	0.632601	6.38075	-7.7019	5.50056e-05	0.000995661	2.08281
Zfp994	0.632277	7.95203	-3.2427	0.0117082	0.0443966	-3.66016
Adprm	0.632105	10.2615	-8.01503	4.12506e-05	0.000821082	2.39276
Cdh1	0.632071	6.60816	-3.14593	0.0135502	0.0491107	-3.81229
Cpt1a	0.631961	8.41588	-6.83726	0.000128017	0.00178363	1.17145
Camk2n2	0.6318	5.18836	-6.80143	0.000132804	0.00181875	1.13182
Tyms	0.630707	4.59475	-8.82498	2.03955e-05	0.000507635	3.14968
Mterf2	0.630656	7.75791	-5.07431	0.000937595	0.0072755	-0.976651
Zfp677	0.630142	7.01394	-8.17346	3.5783e-05	0.000745806	2.54578
Zfp846	0.629779	5.3698	-6.58172	0.000166851	0.00214407	0.88536
Trrap	0.62948	10.0538	-5.32501	0.000689108	0.00577853	-0.645187
Nlrx1	0.629467	6.60541	-4.64331	0.00162569	0.0108581	-1.56768
C79607	0.629464	5.93985	-5.50502	0.000555387	0.0049139	-0.4127
Nsf	0.629279	7.70791	-5.90236	0.000350317	0.0035987	0.084432
Plec	0.627926	8.60503	-6.73531	0.000142164	0.00190316	1.05827
E130311K13Rik	0.627583	6.22251	-6.36292	0.000210588	0.00251687	0.633942
Klhl23	0.626722	5.07768	-7.50433	6.62729e-05	0.00112423	1.88193
Sike1	0.626552	7.05904	-7.11482	9.67922e-05	0.00147158	1.47328
Far1	0.626367	8.87658	-6.52427	0.000177272	0.00223321	0.81993
Lrrc20	0.626214	6.01795	-8.47491	2.74664e-05	0.000616271	2.83016
Uhrf2	0.625723	8.57506	-4.84053	0.00125955	0.00902591	-1.29391
Mtch1	0.625202	8.10568	-7.14392	9.40403e-05	0.00143609	1.50441
Rnf145	0.625083	11.4267	-8.84466	2.0063e-05	0.000501183	3.16731
Tgds	0.624977	8.52935	-7.78003	5.11507e-05	0.000946461	2.1611
Rpgr	0.62484	7.01344	-3.93502	0.00426104	0.0214558	-2.59589
Tnnt1	0.624293	8.04504	-5.23219	0.000771533	0.0062916	-0.766862
Itgav	0.624024	7.34453	-5.41811	0.000616013	0.00531056	-0.524373
C130068B02Rik	0.62382	8.18583	-3.36881	0.00969396	0.0388004	-3.46287
Emilin2	0.62355	4.41687	-3.26899	0.0112545	0.0432993	-3.61893
6330549D23Rik	0.623186	4.38812	-6.21799	0.00024647	0.00281607	0.464032
Mtfmt	0.622197	8.05426	-7.45573	6.94218e-05	0.00115566	1.83187
Tsx	0.622151	6.5569	-4.27744	0.00264972	0.0154148	-2.09023
C76555	0.622081	3.07373	-5.53871	0.000533669	0.00479204	-0.369694
Kmt5c	0.62178	8.12434	-7.08623	9.95823e-05	0.00150061	1.44261
Helq	0.621522	7.45751	-6.67912	0.000150693	0.00198114	0.995351
Reep5	0.621476	9.7801	-6.81163	0.000131422	0.00181137	1.14311
Ccm2	0.621237	9.90192	-6.74162	0.000141241	0.00189451	1.06531
Gm5141	0.620695	7.33718	-6.04724	0.000297646	0.00322474	0.260318
Mboat7	0.620631	7.53666	-4.6277	0.00165926	0.0110169	-1.58958
Sh3glb2	0.619641	8.78322	-5.76034	0.00041206	0.00404545	-0.0907544
Sqor	0.619569	5.46677	-6.79011	0.000134358	0.00182942	1.11926
Slc35b3	0.619327	10.5898	-6.6225	0.000159864	0.00207117	0.931554
Ryr3	0.619195	5.80099	-4.32131	0.00249636	0.0147971	-2.02658
2810021J22Rik	0.618904	8.26845	-6.54901	0.000172698	0.0021904	0.848158
Ptpn5	0.618461	5.54153	-6.02635	0.000304673	0.00328007	0.235128
D930028M14Rik	0.618332	4.52927	-6.45276	0.00019126	0.00234182	0.737909
Cand2	0.617912	6.12823	-5.9074	0.000348322	0.00359343	0.0905951
Sqle	0.617168	6.52734	-6.53642	0.00017501	0.00221287	0.833799
Mast2	0.617082	6.6399	-6.92225	0.00011741	0.00169432	1.26484
Stk11ip	0.616839	8.33957	-5.23071	0.000772926	0.00629795	-0.768804
Rrm1	0.616777	7.29425	-6.41557	0.000199014	0.00241944	0.694987
Manba	0.616726	9.37726	-8.05218	3.98896e-05	0.000805213	2.42887
Gramd1c	0.616028	5.46216	-4.53087	0.00188506	0.0120177	-1.72625
Lmf2	0.615195	8.36364	-6.8267	0.000129408	0.00179448	1.15978
2310061I04Rik	0.615113	9.51393	-9.05165	1.69077e-05	0.000441734	3.35071
Plk4	0.614997	7.68893	-7.44457	7.01685e-05	0.00116221	1.82033
Zfp202	0.614432	5.55976	-3.91319	0.0043946	0.0219666	-2.62864
Fdxr	0.613687	8.13781	-9.29214	1.39163e-05	0.000384279	3.55915
Cmya5	0.613597	4.47419	-3.38758	0.0094269	0.0381409	-3.43361
Dennd1c	0.613025	9.90196	-4.92106	0.00113677	0.00838873	-1.18374
Hars2	0.61145	7.80767	-5.45696	0.000588057	0.00514745	-0.474317
Ctnnal1	0.611147	5.26312	-6.84164	0.000127446	0.00178041	1.17628
2610008E11Rik	0.611018	8.96586	-7.63509	5.85584e-05	0.00103711	2.01535
Ccdc40	0.610661	5.24391	-4.8939	0.00117665	0.00861239	-1.22079
Trim41	0.610591	7.0622	-4.87801	0.0012007	0.00872303	-1.24252
Larp4b	0.610433	10.6981	-7.38578	7.42495e-05	0.00121009	1.75936
Plekha8	0.610331	6.84926	-7.19946	8.9026e-05	0.00137328	1.56355
Ikbip	0.610224	6.50431	-5.31091	0.000700977	0.00583856	-0.663582
Kif2c	0.609936	4.96465	-6.44854	0.000192124	0.00235099	0.733042
Ice2	0.60984	8.34797	-5.85568	0.000369412	0.00374137	0.0271468
Zc2hc1a	0.609753	4.67748	-6.52369	0.000177382	0.00223322	0.819263
C77651	0.609411	7.56599	-4.39654	0.00225525	0.0136884	-1.91806
5830411J07Rik	0.609386	7.56243	-3.86406	0.00471189	0.0231408	-2.70256
AU041133	0.609223	7.44695	-5.79254	0.00039708	0.00394369	-0.0507957
Map4k1	0.608391	9.06257	-8.62429	2.4161e-05	0.000563088	2.96787
D7Ertd316e	0.608295	6.63986	-6.0026	0.000312882	0.00333692	0.206423
Bbs4	0.607848	6.57275	-5.60515	0.000493522	0.00456136	-0.285359
Myo1c	0.607543	7.22482	-6.85344	0.000125919	0.00176808	1.18929
Gtf3c3	0.607366	6.61881	-4.66218	0.00158609	0.0106723	-1.54124
Trappc11	0.606866	9.72738	-6.80114	0.000132843	0.00181875	1.1315
Zfp282	0.606836	6.29521	-8.42968	2.85645e-05	0.000630602	2.78804
Cep19	0.606591	8.95287	-6.91883	0.000117817	0.00169685	1.2611
Rfc2	0.606266	9.43398	-9.29697	1.38627e-05	0.000383774	3.56328
Lias	0.605763	7.90601	-5.90286	0.000350121	0.0035987	0.085034
Parp1	0.605644	8.4456	-8.5334	2.61158e-05	0.000597777	2.88433
H1f0	0.605436	9.40533	-4.26234	0.00270483	0.0156351	-2.11219
Nbn	0.604863	8.90087	-8.7621	2.15e-05	0.000521209	3.09311
Trpm1	0.603259	4.34077	-5.06067	0.000953689	0.00736971	-0.994957
C76872	0.603245	7.23374	-4.20496	0.00292581	0.0165761	-2.19595
Mccc1	0.602762	8.61298	-6.93151	0.000116313	0.00168347	1.27497
Bckdhb	0.601975	8.56787	-4.66297	0.00158446	0.0106648	-1.54014
Pask	0.601726	6.35291	-5.31901	0.000694132	0.00579929	-0.653012
Izumo4	0.601455	6.80805	-5.21567	0.000787296	0.00637955	-0.788636
D2Ertd173e	0.601452	5.53396	-3.20294	0.0124311	0.0461529	-3.7226
Fbxl2	0.601382	3.71645	-6.21369	0.000247633	0.00282169	0.458947
Zcchc3	0.60131	5.50469	-5.3752	0.000648586	0.00551257	-0.579896
Traip	0.600962	4.7947	-8.56883	2.53335e-05	0.000583125	2.91699
Enkd1	0.600953	6.46561	-4.71995	0.00147123	0.0101016	-1.46063
Tor4a	0.600619	9.33804	-4.6295	0.00165535	0.0110047	-1.58705
Mlkl	0.600491	6.87752	-6.10032	0.000280584	0.00308552	0.324055
Pdik1l	0.600364	6.7387	-4.7793	0.00136257	0.00954077	-1.3783
Dync2li1	0.599883	6.06082	-6.08789	0.000284481	0.00311835	0.30916
Pds5a	0.59969	9.45036	-5.871	0.000363022	0.00368757	0.0459808
Marf1	0.599207	8.9725	-5.35192	0.000667049	0.00563913	-0.610139
Tmub2	0.59898	10.6323	-5.72219	0.000430619	0.00418534	-0.138287
Myo1g	0.59887	9.75636	-5.75415	0.000415013	0.00406277	-0.0984599
Zfp647	0.5981	5.55406	-4.43475	0.00214253	0.0131876	-1.86324
Ece1	0.597537	7.16094	-6.98405	0.000110306	0.00161475	1.33222
Tbc1d8b	0.597442	7.15052	-4.11554	0.00330993	0.018011	-2.32737
Slc35d2	0.597212	8.25289	-7.51398	6.56664e-05	0.00111671	1.89184
Srsf12	0.597198	4.18201	-4.10046	0.00337991	0.0182802	-2.34965
Tubg1	0.597173	7.30592	-7.94061	4.4134e-05	0.000862043	2.32002
Erlin1	0.59713	6.40647	-6.51352	0.000179301	0.00224636	0.807639
Ccdc126	0.597001	6.81555	-5.9684	0.000325136	0.00342839	0.164951
Flot2	0.596425	8.49367	-6.70496	0.000146704	0.00194867	1.02433
Nsmf	0.596388	6.74648	-7.87688	4.67824e-05	0.000890037	2.25726
Upf3b	0.594612	9.43966	-3.97083	0.00405125	0.020689	-2.54228
Fam53a	0.594545	7.89172	-7.03148	0.000105177	0.00155971	1.38361
Cma1	0.59429	5.09322	-4.99139	0.00104015	0.00785728	-1.08828
9130009I01Rik	0.594108	5.89056	-3.57679	0.0071315	0.0310795	-3.14047
Arrb2	0.593947	10.1687	-7.92918	4.45967e-05	0.00086613	2.30879
Smpdl3a	0.593535	12.234	-9.08524	1.64499e-05	0.00043588	3.38011
Gna14	0.593436	3.84903	-4.57996	0.00176669	0.0114953	-1.6568
Qprt	0.593346	7.41938	-5.84563	0.000373671	0.00377147	0.0147757
Cplane1	0.593104	6.3082	-4.04399	0.00365636	0.019312	-2.43329
Psmg1	0.591828	8.92287	-6.85251	0.000126039	0.00176808	1.18827
Smpd2	0.591824	7.52037	-6.06943	0.000290379	0.00316581	0.287005
9030607L02Rik	0.590827	4.36938	-4.53979	0.00186295	0.0119211	-1.71361
B4gat1	0.59016	6.41828	-6.13641	0.000269597	0.00299814	0.367187
Hmgn5	0.59002	8.25656	-6.25394	0.00023698	0.00273354	0.506431
Ung	0.589922	9.03599	-5.91146	0.000346723	0.00358054	0.0955597
Abhd18	0.589252	5.23146	-6.33566	0.000216872	0.00256654	0.602188
Carf	0.587311	5.79413	-5.38097	0.000644097	0.00549035	-0.572412
Vangl2	0.587164	4.68659	-8.2598	3.31458e-05	0.000705905	2.62813
Rnase4	0.587028	9.06599	-6.94991	0.00011417	0.00165829	1.29505
D430042O09Rik	0.58647	5.69596	-4.40172	0.0022396	0.0136337	-1.91061
Lpxn	0.586325	10.2815	-7.14066	9.43445e-05	0.00143967	1.50093
Rtel1	0.585858	5.88721	-5.99745	0.000314693	0.00335275	0.200194
Caps2	0.585678	2.85058	-4.34039	0.00243266	0.0145414	-1.99897
Akap8l	0.585318	9.78379	-4.69633	0.00151707	0.0103333	-1.49353
Tsen34	0.584956	6.8745	-4.88259	0.00119371	0.00869055	-1.23625
Nudt5	0.584625	7.12828	-3.47633	0.00826553	0.0346308	-3.29569
Spn	0.584611	9.80482	-7.62087	5.93469e-05	0.00104297	2.00093
AU015603	0.584594	5.54128	-4.66709	0.00157596	0.0106248	-1.53437
Aldh2	0.584178	5.74896	-5.99954	0.000313956	0.00334664	0.202723
Tuba1b	0.583863	12.5118	-8.46994	2.75849e-05	0.000617619	2.82553
Lrrc40	0.58373	8.70057	-6.78864	0.00013456	0.00182942	1.11763
Nefh	0.583554	8.41244	-4.26505	0.00269484	0.015595	-2.10824
Kcnk6	0.58319	3.38984	-3.37659	0.00958237	0.038502	-3.45074
Misp3	0.583106	5.31306	-3.70589	0.00591125	0.0272354	-2.94253
Tigd3	0.583102	7.67323	-3.9753	0.00402586	0.0206004	-2.53561
Recql4	0.582919	5.82197	-3.28251	0.0110286	0.0426926	-3.59775
Maz	0.582799	11.4825	-6.69377	0.000148417	0.00196379	1.01179
Cbx6	0.582479	11.3833	-8.5051	2.67599e-05	0.000608404	2.85815
1500004A13Rik	0.581573	4.8386	-5.60172	0.000495513	0.00457357	-0.2897
Myo18a	0.581471	8.85143	-8.20714	3.47275e-05	0.000730489	2.57799
Bhlhb9	0.581346	9.02892	-7.59308	6.09223e-05	0.00105976	1.97269
Gucd1	0.581185	7.93629	-6.18276	0.000256177	0.00289155	0.422317
Pts	0.581079	7.02862	-6.02717	0.000304391	0.00327876	0.236126
Cntln	0.581035	6.37607	-5.32821	0.000686438	0.00576501	-0.641005
Brip1os	0.580941	8.03347	-4.68746	0.00153466	0.0104254	-1.5059
Gcc2	0.580936	7.57582	-7.90402	4.56336e-05	0.000878169	2.28404
Hif1a	0.580651	10.4401	-5.1314	0.000873429	0.00691654	-0.900382
AA407331	0.580448	7.43294	-3.35711	0.00986444	0.0392834	-3.48112
Lrba	0.580334	5.94651	-5.48026	0.000571963	0.00503666	-0.444404
Tmem173	0.580128	10.8327	-6.96579	0.000112355	0.00163772	1.31235
Hook1	0.580025	8.13493	-7.23582	8.59045e-05	0.00134285	1.60206
Atad2	0.580023	7.81519	-7.08888	9.93194e-05	0.00149834	1.44547
Slfn10-ps	0.579772	8.43752	-4.89743	0.00117139	0.00858548	-1.21597
Spata1	0.579731	7.30961	-7.1678	9.18468e-05	0.00140679	1.52988
Abhd1	0.579624	6.69627	-3.87812	0.00461865	0.0227702	-2.68138
Wdr81	0.579436	7.53874	-5.67958	0.000452438	0.00431383	-0.191608
Guf1	0.579243	7.37339	-7.83064	4.88142e-05	0.000917115	2.21147
A930041H05Rik	0.578914	6.67538	-5.0571	0.000957947	0.00739148	-0.999749
Tmem156	0.578867	9.69855	-4.95221	0.00109282	0.00815299	-1.14137
Gpr160	0.578787	5.86911	-5.88555	0.000357065	0.00364691	0.0638373
Pip4k2a	0.577345	8.69639	-7.53465	6.43884e-05	0.00110045	1.91303
Hirip3	0.577047	8.1364	-6.63265	0.000158176	0.0020584	0.943015
Ormdl1	0.576667	9.28008	-5.38869	0.00063815	0.00545553	-0.562418
Pkp3	0.576216	7.76767	-6.62692	0.000159126	0.00206626	0.936549
4930592A05Rik	0.575952	5.29593	-5.37733	0.000646927	0.00550533	-0.577137
Bora	0.575817	8.57966	-7.35907	7.61901e-05	0.00123329	1.73153
H2-DMa	0.575563	7.56529	-6.76152	0.000138369	0.00186459	1.08749
Ezh1	0.575219	6.80797	-7.07465	0.000100737	0.00151246	1.43016
Smarcc1	0.575082	8.00281	-7.31466	7.95425e-05	0.00127249	1.68508
Hmbs	0.57498	7.57841	-7.24893	8.48086e-05	0.00132875	1.61591
2610028L16Rik	0.574698	7.55003	-5.76634	0.000409222	0.00402722	-0.0832972
Nek3	0.574597	7.90796	-4.99088	0.00104083	0.00785947	-1.08897
2310015A10Rik	0.574452	6.67146	-6.49374	0.000183102	0.00227989	0.784984
Dlgap5	0.573904	6.49761	-6.52516	0.000177105	0.00223248	0.820947
AA409261	0.573345	6.33687	-4.55369	0.00182899	0.0117884	-1.69392
2810416A17Rik	0.573171	3.49908	-5.78779	0.000399251	0.00396333	-0.0566789
Pacsin1	0.573054	8.71774	-4.77438	0.00137124	0.00958189	-1.38512
Aars	0.572921	8.56623	-7.8165	4.94548e-05	0.000923742	2.19742
Ang	0.572913	6.57619	-4.39073	0.00227294	0.0137729	-1.92641
Zscan21	0.572842	8.02564	-4.11936	0.00329245	0.0179349	-2.32174
Xylb	0.572811	5.98328	-5.19371	0.000808814	0.00651787	-0.817665
Stoml1	0.570768	6.89296	-5.73294	0.000425297	0.0041476	-0.124869
Polg	0.570614	7.28585	-5.88593	0.000356913	0.00364691	0.0642953
Grb10	0.570388	4.78062	-3.34954	0.00997635	0.0396138	-3.49293
Cep78	0.570074	6.49715	-6.85825	0.000125302	0.00176378	1.19459
Zfp932	0.570001	9.76816	-5.42157	0.00061346	0.00530192	-0.519897
Ciz1	0.569948	9.72172	-6.2655	0.000234015	0.00270954	0.520027
Zfp870	0.569743	6.62721	-4.37439	0.00232351	0.0140321	-1.94993
Ctsz	0.569621	9.55922	-8.48507	2.72263e-05	0.000613481	2.83959
Hivep3	0.569423	7.19599	-5.40245	0.000627687	0.00538404	-0.544604
Mtmr11	0.569396	5.72836	-4.96938	0.00106939	0.00800444	-1.11808
Gpatch1	0.568042	7.38537	-7.80846	4.98232e-05	0.000928087	2.18943
Lin9	0.568004	6.60566	-6.95454	0.000113637	0.00165172	1.3001
Mphosph9	0.567983	9.20247	-8.72787	2.21291e-05	0.000531436	3.06216
Trim5	0.567953	8.94791	-7.38529	7.42849e-05	0.00121009	1.75885
Fam8a1	0.567899	10.1874	-4.80948	0.00131068	0.00927573	-1.33663
Slc25a45	0.567653	8.73887	-6.85267	0.000126018	0.00176808	1.18845
Homez	0.567503	6.77603	-4.79416	0.00133674	0.0093888	-1.35777
Emp3	0.566884	11.3642	-4.85086	0.00124302	0.00895434	-1.27972
Cep72	0.566447	5.14945	-5.88318	0.000358028	0.00365132	0.0609298
Dgka	0.566358	11.7785	-5.91768	0.000344292	0.00356712	0.103155
Mettl14	0.565827	9.05039	-6.35644	0.000212065	0.00252555	0.626394
Grn	0.565637	7.78078	-6.77351	0.000136671	0.00184907	1.10082
Pgghg	0.564516	8.64164	-5.10238	0.000905425	0.00708829	-0.939093
Qrsl1	0.563864	7.91365	-7.32031	7.9107e-05	0.00126651	1.691
Samd1	0.563642	7.91708	-7.48001	6.78285e-05	0.00113931	1.85691
Casc4	0.563524	6.23066	-4.1782	0.00303547	0.0169862	-2.23517
Abhd14b	0.563198	7.61306	-6.80791	0.000131923	0.0018138	1.139
Plekha2	0.562852	9.24225	-7.61808	5.95032e-05	0.00104304	1.9981
Msto1	0.562396	8.77944	-8.47373	2.74946e-05	0.000616271	2.82905
Thumpd3	0.56203	8.21651	-5.21337	0.000789528	0.00639234	-0.791685
Pkd2	0.561961	3.45987	-6.51495	0.000179029	0.00224612	0.809278
Bdh1	0.561485	7.21911	-7.20915	8.81823e-05	0.0013639	1.57382
Pfkp	0.561277	8.63032	-7.44953	6.98355e-05	0.00115972	1.82546
Ldlrap1	0.560109	6.71035	-7.07272	0.000100931	0.00151426	1.42809
Ints3	0.559442	8.11483	-5.57304	0.000512495	0.00466415	-0.326039
Pdk3	0.559238	8.13865	-6.90031	0.000120052	0.00171698	1.24081
Hip1r	0.559121	8.02339	-7.91117	4.53362e-05	0.000875158	2.29108
Arhgap45	0.558523	11.0472	-5.36027	0.00066036	0.0055941	-0.599279
Rad1	0.557989	8.10578	-4.00724	0.00384931	0.0200268	-2.48796
Pym1	0.557678	8.87011	-6.01335	0.000309135	0.00331592	0.219431
Ipp	0.557549	7.14809	-4.93019	0.00112368	0.00832272	-1.1713
Rexo2	0.557524	10.6802	-5.42779	0.000608913	0.00527799	-0.511879
Myo9a	0.557411	5.5384	-5.01079	0.0010151	0.00771353	-1.06207
Anxa4	0.557309	6.11085	-5.69762	0.000443057	0.00426806	-0.169007
Tpi1	0.557252	9.98785	-5.32039	0.000692967	0.00579848	-0.651203
Eif2b4	0.557161	8.9065	-6.83017	0.00012895	0.00179132	1.16362
Edc3	0.557135	9.1508	-5.42044	0.000614293	0.00530241	-0.521359
Cetn4	0.557113	6.3386	-5.81961	0.00038495	0.00384369	-0.0173158
Ntf5	0.556889	3.31888	-5.98795	0.000318067	0.00337119	0.188679
4733401A01Rik	0.556673	7.66571	-3.67906	0.00614515	0.0279691	-2.98351
Lxn	0.556511	8.97498	-4.61529	0.00168649	0.0111288	-1.60703
Sptb	0.556469	5.85645	-5.49854	0.000559675	0.00494544	-0.420992
Rnf227	0.556276	6.00475	-3.88039	0.00460378	0.0227132	-2.67796
Cfap157	0.555854	4.6306	-5.22445	0.000778875	0.00633385	-0.777059
Phkg2	0.555688	10.1889	-6.50106	0.000181684	0.00227066	0.79338
Ints2	0.555166	8.1194	-6.31246	0.000222383	0.00261667	0.575085
6330403K07Rik	0.554961	9.28081	-6.34696	0.000214243	0.00254094	0.615356
Tfdp1	0.554934	11.219	-5.62403	0.000482726	0.0044977	-0.261503
Ugdh	0.553394	10.7291	-7.21116	8.80083e-05	0.0013639	1.57595
Smox	0.553375	7.41695	-3.86697	0.00469242	0.0230784	-2.69817
9030203C11Rik	0.553098	7.21902	-4.69267	0.00152429	0.010379	-1.49863
Zfp54	0.552932	4.46482	-4.47355	0.00203428	0.0127121	-1.80778
Nupl2	0.55276	5.86166	-5.09593	0.000912708	0.00713366	-0.947711
6530406A20Rik	0.552512	7.48788	-5.68026	0.000452079	0.00431241	-0.190753
Lamp2	0.552479	8.62528	-5.31001	0.000701743	0.00583856	-0.664758
Kifap3	0.552263	6.72594	-6.11523	0.000275985	0.00305131	0.341899
Ubxn2b	0.552234	6.69692	-7.44297	7.0276e-05	0.00116221	1.81868
Tep1	0.552114	8.97314	-6.50228	0.00018145	0.00226912	0.794773
Cdc23	0.552057	6.18848	-7.43244	7.09897e-05	0.00116942	1.80778
Dnajc9	0.551975	10.1003	-7.24149	8.54284e-05	0.00133744	1.60806
Zfp141	0.551368	7.26402	-5.35561	0.000664085	0.00562334	-0.60534
Vps29	0.551191	8.55875	-6.89954	0.000120146	0.00171712	1.23997
Xist	0.550881	11.1064	-6.14363	0.000267458	0.00298277	0.375784
Bri3bp	0.550668	6.29218	-5.69732	0.00044321	0.00426806	-0.169378
Gtf2h2	0.549881	8.99595	-7.30811	8.00506e-05	0.00127763	1.67821
Ctnna1	0.548946	6.39944	-7.26754	8.32797e-05	0.00131182	1.63554
Rc3h2	0.548928	6.88788	-4.57687	0.0017739	0.0115312	-1.66116
Dclre1a	0.548676	5.5884	-5.06943	0.000943315	0.00731159	-0.983194
Mthfd1l	0.548398	9.49718	-8.16513	3.60495e-05	0.000749048	2.5378
Zfyve16	0.547807	6.62925	-3.50162	0.00796308	0.0336801	-3.25652
Dnase2a	0.547679	7.46172	-5.39334	0.000634592	0.00543191	-0.556393
Farp1	0.547574	6.02283	-6.33264	0.000217581	0.00257197	0.598664
Cpq	0.547568	4.89689	-5.93324	0.000338285	0.00352894	0.122154
Caml	0.547527	8.82907	-5.18952	0.000812985	0.00653863	-0.823202
Zfp429	0.546763	8.32222	-3.64957	0.00641376	0.0289083	-3.02866
Tdp2	0.546397	10.4573	-5.81601	0.000386536	0.00385203	-0.0217552
Tha1	0.545714	6.1026	-3.4009	0.00924214	0.0375713	-3.41287
Cep250	0.545662	7.14501	-6.28705	0.000228595	0.00267289	0.545336
Chst12	0.545645	7.3223	-6.87044	0.000123755	0.00175249	1.20801
Itgb3bp	0.54541	5.72864	-7.48976	6.71998e-05	0.00113048	1.86695
Tnfaip8l1	0.545109	7.00453	-4.80199	0.00132337	0.00933	-1.34697
Krit1	0.544814	7.74097	-3.70304	0.00593567	0.0273131	-2.94688
Ampd2	0.544164	8.99373	-4.97611	0.00106036	0.0079659	-1.10896
Tepsin	0.543986	7.59686	-5.64336	0.000471943	0.00443182	-0.237138
Marcksl1	0.543887	9.35807	-6.74538	0.000140692	0.00189098	1.06951
Daglb	0.543439	8.84509	-5.62317	0.000483212	0.0044985	-0.26259
Iqgap3	0.543366	4.51259	-6.20975	0.000248705	0.00282743	0.454284
Zfp182	0.543271	7.01648	-5.4089	0.000622845	0.00535321	-0.53626
Evl	0.543027	9.98954	-5.72308	0.000430175	0.00418522	-0.137173
Gata2	0.54283	6.06327	-3.14906	0.0134863	0.0489454	-3.80737
Abca3	0.542686	6.44715	-6.83568	0.000128225	0.00178463	1.1697
Tmbim1	0.542491	7.64274	-5.56967	0.000514534	0.00467342	-0.330321
Sapcd2	0.542271	6.00964	-6.49775	0.000182324	0.00227588	0.789585
Dcakd	0.542039	7.42954	-5.31979	0.000693476	0.00579929	-0.651993
Suox	0.541968	5.35947	-3.62323	0.00666421	0.0295843	-3.06906
Csad	0.541861	6.54315	-6.46976	0.000187829	0.00231283	0.757458
Pigg	0.541791	5.76896	-4.76029	0.00139639	0.00972115	-1.40462
Cenpl	0.541635	8.2226	-3.20852	0.0123269	0.0458741	-3.71383
D6Wsu163e	0.541625	7.83162	-5.22108	0.0007821	0.00635503	-0.781508
Fam111a	0.541499	10.4254	-5.91512	0.000345291	0.00356934	0.10003
Upf2	0.540923	7.72272	-5.3877	0.00063891	0.00545848	-0.5637
Hdac3	0.540551	8.84692	-8.17773	3.56473e-05	0.000743734	2.54987
Srsf4	0.539862	10.0057	-5.06834	0.000944599	0.00731435	-0.984657
Mrps6	0.539686	11.1022	-5.11558	0.000890715	0.00700985	-0.92147
Plpp1	0.539342	4.69203	-6.76411	0.000138	0.00186323	1.09037
Rpap2	0.539204	7.64948	-4.92886	0.00112558	0.00833347	-1.17311
Serpinf1	0.538786	6.37908	-4.18966	0.00298795	0.0168248	-2.21836
9030218A15Rik	0.538616	4.97574	-4.31556	0.0025159	0.0148689	-2.0349
Acad9	0.538534	7.15561	-5.56045	0.000520151	0.0047036	-0.342029
Lck	0.538239	11.2323	-4.29557	0.00258515	0.0151483	-2.06389
Zfp825	0.537825	6.34768	-4.10127	0.00337608	0.0182795	-2.34844
Tor2a	0.537756	9.68829	-6.48418	0.00018497	0.00229495	0.774021
Zik1	0.536981	4.77873	-6.17512	0.000258339	0.00290954	0.413244
C77405	0.536962	4.66035	-3.94921	0.00417653	0.021144	-2.57462
Abraxas1	0.536746	6.73846	-4.54703	0.00184518	0.01187	-1.70335
Gm4415	0.536709	4.46078	-5.27406	0.000733086	0.00603325	-0.71182
Trim8	0.535882	8.97733	-4.59228	0.00173827	0.0113727	-1.63942
C76798	0.535849	5.29352	-3.36196	0.00979342	0.0390537	-3.47356
4833412E19Rik	0.535643	7.62217	-3.36291	0.00977948	0.0390209	-3.47207
Xkr8	0.535492	6.49379	-3.40464	0.00919095	0.0374077	-3.40705
Celsr2	0.535274	5.83054	-6.83883	0.000127812	0.0017832	1.17318
Zfp518b	0.534998	5.19823	-5.55829	0.000521477	0.00470937	-0.344776
Nup160	0.534896	7.22468	-5.90534	0.000349136	0.00359459	0.0880758
Atp9a	0.534893	5.94447	-7.68603	5.58273e-05	0.00100435	2.06683
Cyb5a	0.534678	9.67233	-6.48136	0.000185525	0.00229646	0.770785
Tia1	0.534547	7.19363	-7.11768	9.65178e-05	0.00147064	1.47635
Fbf1	0.534312	7.66219	-5.40509	0.0006257	0.00537148	-0.541186
Ap3b1	0.534229	9.95532	-6.2712	0.00023257	0.00269783	0.526719
H2afv	0.53418	8.37557	-7.21414	8.77506e-05	0.00136236	1.57912
2900009J20Rik	0.534018	7.05628	-3.76467	0.00543125	0.0255715	-2.85301
Thoc5	0.533684	9.72507	-8.11218	3.77962e-05	0.000775937	2.48689
Pex1	0.533386	7.38077	-6.12718	0.000272362	0.0030243	0.356166
Hoxc8	0.532783	3.65573	-3.56407	0.00726548	0.0314234	-3.16007
Zw10	0.5327	6.14485	-3.25883	0.0114276	0.0437594	-3.63486
Phf14	0.532686	7.19357	-4.48226	0.00201081	0.0125884	-1.79537
H2-Oa	0.53263	8.90999	-5.1678	0.000835022	0.0066766	-0.851989
Aasdh	0.532387	8.87698	-4.6327	0.00164843	0.0109676	-1.58256
Cenpu	0.532386	7.17999	-7.64421	5.80589e-05	0.00103093	2.02458
Naprt	0.532174	7.32398	-5.46527	0.000582258	0.0051054	-0.463635
B230213L16Rik	0.531723	7.03972	-4.00905	0.00383955	0.0199861	-2.48526
Poll	0.531399	6.61679	-6.49051	0.000183731	0.0022851	0.781283
Prr12	0.530998	7.32582	-5.55378	0.000524262	0.00473035	-0.350518
Naa20	0.530719	10.4191	-4.7583	0.00139998	0.00973591	-1.40737
Cst7	0.530492	10.2937	-6.04758	0.000297534	0.00322474	0.260725
Osbpl2	0.530229	9.15037	-6.01518	0.000308503	0.00331262	0.221638
BB212172	0.530103	6.94324	-6.00473	0.000312137	0.00333117	0.208998
1700066B19Rik	0.530093	4.05129	-4.30735	0.00254408	0.0149744	-2.0468
Def6	0.529704	9.87364	-4.80889	0.00131168	0.00927627	-1.33745
Clcc1	0.529367	7.8308	-6.62252	0.00015986	0.00207117	0.931579
Prorp	0.529356	8.01889	-5.29413	0.000715405	0.00591862	-0.685527
Anapc4	0.529243	10.022	-6.47882	0.000186026	0.00230093	0.767874
Brca1	0.528878	5.63354	-5.91413	0.000345679	0.00357155	0.0988158
Fam81a	0.528848	4.04576	-5.32546	0.000688732	0.00577853	-0.644599
Zfp74	0.528429	6.83672	-4.08395	0.00345834	0.0185402	-2.37406
BC065403	0.528393	5.78348	-5.78476	0.000400642	0.00397329	-0.0604338
Cdk3	0.528246	4.99571	-5.93488	0.000337657	0.00352598	0.12416
Tuft1	0.528233	6.98011	-3.71121	0.00586598	0.0270531	-2.93441
Cbfa2t3	0.52804	5.52813	-5.12343	0.000882093	0.00696338	-0.911004
Ptgfrn	0.528028	5.07601	-5.26919	0.000737448	0.00605942	-0.718208
Wrap53	0.527924	6.6164	-7.40785	7.26878e-05	0.00118785	1.78229
Zfp26	0.527642	10.0297	-4.16441	0.00309369	0.017197	-2.25542
Akap6	0.527563	4.54723	-5.56144	0.000519547	0.00470229	-0.340776
Mfsd8	0.527463	7.46264	-7.62403	5.91705e-05	0.00104255	2.00414
Ahi1	0.527242	7.32399	-5.31389	0.000698451	0.00582772	-0.659693
Spaca9	0.526997	5.45653	-7.06177	0.00010204	0.00152531	1.4163
Coq3	0.52696	7.18501	-5.35251	0.000666576	0.00563913	-0.609373
Xpo6	0.52636	9.89732	-6.27202	0.00023236	0.00269693	0.527693
Hmgb2	0.526154	10.3973	-5.58937	0.000502747	0.00460716	-0.30533
Grik5	0.526099	6.3826	-6.07291	0.000289256	0.00315718	0.291191
Zfp667	0.526041	6.90421	-3.70361	0.00593075	0.0273028	-2.94601
D030028M11Rik	0.526028	4.57353	-3.88411	0.00457952	0.0226262	-2.67235
Idh1	0.525642	7.99588	-3.13975	0.0136778	0.0494393	-3.82203
Rassf2	0.525305	7.03518	-7.05953	0.000102268	0.00152762	1.41389
Usp21	0.525252	7.7644	-6.14172	0.000268021	0.00298712	0.373516
Cd79b	0.525184	5.7189	-3.82358	0.00499175	0.0240924	-2.76369
Gin1	0.52484	7.04074	-6.32868	0.000218514	0.00258002	0.594043
Prmt2	0.523968	8.47309	-6.89003	0.000121312	0.00172777	1.22954
Nat8f4	0.523818	6.09543	-6.97472	0.000111348	0.00162582	1.32207
Sipa1	0.523618	10.6597	-5.67101	0.000456969	0.00434693	-0.202359
Pola1	0.523205	5.3716	-5.5119	0.000550875	0.00489087	-0.403907
Zfp329	0.523115	8.90924	-4.15893	0.00311716	0.0172597	-2.26347
Nsl1	0.522857	4.9019	-4.65817	0.00159442	0.0107038	-1.54686
Mdm1	0.522813	4.88638	-5.51142	0.000551185	0.0048915	-0.404512
Serp2	0.521765	6.17207	-6.92085	0.000117577	0.00169457	1.2633
Zfyve26	0.521387	8.45408	-5.10452	0.000903022	0.00707989	-0.936234
Fbln1	0.521128	6.12209	-7.018	0.000106607	0.0015731	1.36903
Nagk	0.520391	6.78768	-5.17992	0.000822646	0.00660597	-0.835917
Rad51b	0.520004	3.70464	-7.94791	4.38418e-05	0.000859609	2.32717
Cfap97	0.519693	7.45119	-6.20229	0.000250746	0.0028459	0.445458
Il10rb	0.519552	7.05571	-6.2743	0.000231785	0.00269483	0.530368
Ap1s2	0.519541	7.02511	-5.48163	0.000571033	0.00503063	-0.44265
Dsn1	0.519472	7.53313	-7.00508	0.000107999	0.00158664	1.35503
Dtwd1	0.518576	8.05887	-3.28038	0.0110638	0.0427725	-3.60108
Mt1	0.518349	5.48232	-3.15111	0.0134445	0.0488455	-3.80414
Tirap	0.518139	7.26977	-4.8014	0.00132436	0.00933057	-1.34778
Zdhhc6	0.516683	6.87573	-5.06799	0.00094501	0.00731435	-0.985125
Hspb11	0.516683	5.94778	-5.04377	0.000974029	0.0074678	-1.01765
Lrrc45	0.516661	9.01289	-4.19966	0.0029472	0.0166553	-2.20372
Gstt2	0.516366	8.84089	-4.99451	0.00103608	0.00783514	-1.08406
Ptpn6	0.516094	9.80399	-5.8908	0.000354943	0.0036325	0.0702694
Pfkfb1	0.515757	6.84825	-3.2596	0.0114144	0.0437418	-3.63365
Trdmt1	0.515393	6.72576	-3.94041	0.00422872	0.0213298	-2.5878
6720475M21Rik	0.515236	4.56203	-3.51607	0.00779558	0.0331471	-3.23417
Capn2	0.515151	10.8247	-7.2921	8.13083e-05	0.00128892	1.66139
Dock8	0.515029	8.39395	-6.52214	0.000177673	0.00223415	0.817491
Tcf4	0.51474	5.59868	-5.36999	0.000652671	0.00554041	-0.586661
Rab11fip5	0.514462	5.50724	-6.10537	0.000279016	0.00307487	0.330106
Brms1l	0.514016	8.09805	-5.58744	0.000503892	0.00460848	-0.307784
Arap1	0.513848	8.31976	-5.81819	0.000385576	0.00384807	-0.0190707
Tubgcp6	0.513626	7.36885	-7.56111	6.27924e-05	0.0010831	1.94009
Gatd1	0.513424	7.56218	-4.33307	0.00245688	0.0146435	-2.00955
Lrrc42	0.513114	7.85312	-6.78791	0.000134661	0.00182942	1.11682
5530601H04Rik	0.513095	7.28772	-5.68056	0.000451924	0.00431241	-0.190382
Abhd14a	0.512958	7.94138	-6.68459	0.000149839	0.0019737	1.00149
Carmil2	0.512674	7.48142	-3.99282	0.00392797	0.020297	-2.50946
Fam71b	0.512653	4.96951	-5.82036	0.000384616	0.00384369	-0.0163817
Bco2	0.512446	4.10814	-5.47825	0.00057333	0.00504181	-0.446977
Tfcp2	0.512334	7.24881	-4.7051	0.00149986	0.0102399	-1.4813
Pisd-ps3	0.511937	9.62022	-4.71902	0.00147301	0.010107	-1.46193
Sirt7	0.511667	10.0735	-5.69939	0.000442145	0.00426526	-0.166783
Unc119	0.511361	8.61371	-4.77256	0.00137446	0.0095978	-1.38763
Gk	0.511244	5.30365	-6.60397	0.000162998	0.00210247	0.91059
Tmem126b	0.511104	7.04666	-4.54514	0.00184979	0.0118743	-1.70603
Snx25	0.510442	8.95594	-5.41894	0.000615395	0.00530746	-0.523292
Sh3bgrl	0.510436	10.2696	-7.30829	8.00365e-05	0.00127763	1.6784
Hyi	0.510296	7.81696	-6.93645	0.000115734	0.00167744	1.28036
Adamtsl4	0.510184	4.49863	-3.75433	0.00551262	0.0258597	-2.86873
Cep295	0.510024	6.99149	-5.12919	0.000875819	0.00692718	-0.903323
Ssc4d	0.509485	5.6104	-3.51418	0.0078173	0.0332073	-3.23709
D5Ertd301e	0.509404	5.90422	-6.56975	0.000168965	0.002162	0.871759
Akr1e1	0.509209	6.6193	-6.53136	0.000175948	0.00222025	0.828025
Aldh18a1	0.509175	9.12054	-6.14956	0.000265714	0.00296977	0.382851
Fam13b	0.508879	8.91018	-6.66884	0.000152315	0.00199519	0.983791
Naa40	0.508038	6.88744	-5.54746	0.000528185	0.00475447	-0.358558
C77545	0.506815	6.90736	-3.28631	0.0109658	0.0425054	-3.59179
Cwf19l2	0.506572	8.10123	-6.05093	0.000296425	0.0032166	0.264757
Bid	0.505944	6.46929	-5.86213	0.000366704	0.00371945	0.0350878
Foxm1	0.505939	5.35256	-5.11002	0.000896879	0.00704215	-0.928889
1700066M21Rik	0.505916	6.83437	-3.4063	0.00916831	0.0373283	-3.40446
Rnh1	0.505872	10.0325	-7.55182	6.33476e-05	0.00108902	1.9306
Fam89a	0.505861	4.74106	-4.15411	0.00313798	0.0173235	-2.27056
Agpat4	0.505307	6.46628	-5.87666	0.000360692	0.00366755	0.0529279
Lmntd2	0.505152	7.99138	-6.26808	0.000233358	0.00270392	0.523063
Tmem17	0.504836	5.32765	-5.44162	0.000598924	0.00522251	-0.494053
Primpol	0.504519	8.24777	-5.2188	0.000784285	0.00637025	-0.784511
Aldoc	0.504318	4.8497	-7.70092	5.50557e-05	0.000995661	2.08183
B3gntl1	0.504116	7.18011	-4.3199	0.00250115	0.0148093	-2.02862
E2f1	0.503867	5.86623	-4.49427	0.00197891	0.0124343	-1.77825
Glb1	0.50385	9.15885	-6.33387	0.000217291	0.00257002	0.600102
Fancd2	0.503781	4.7275	-5.30717	0.000704169	0.00585399	-0.668475
Tbc1d32	0.50319	6.06023	-3.8273	0.0049653	0.0240287	-2.75807
Hist1h2bp	0.503134	6.26438	-4.16004	0.0031124	0.0172475	-2.26184
Myo1e	0.502837	6.43824	-4.66912	0.0015718	0.0106144	-1.53154
Kiz	0.502664	8.57408	-4.19383	0.00297088	0.0167553	-2.21225
Rnf32	0.502547	4.42379	-5.68975	0.000447122	0.00428706	-0.178859
Dtx3	0.502533	8.49836	-3.59276	0.00696695	0.0305441	-3.11588
Cd81	0.502405	10.6524	-5.96315	0.000327064	0.00344405	0.158569
Ptpn21	0.502342	4.78787	-5.66861	0.000458252	0.0043511	-0.205383
Nudt1	0.502053	9.45472	-4.61903	0.00167824	0.0111145	-1.60177
Emc9	0.501943	6.76527	-6.20464	0.000250101	0.00284173	0.448237
Utp20	0.501895	9.19279	-5.9732	0.000323385	0.00341695	0.17078
Zfp882	0.50157	7.21355	-3.19511	0.0125789	0.0466088	-3.7349
Xrcc1	0.501312	7.8589	-5.54691	0.000528524	0.00475447	-0.359248
Micu1	0.501234	7.18597	-3.63816	0.00652097	0.0292069	-3.04615
Zfp810	0.500688	8.28087	-6.74469	0.000140793	0.00189098	1.06874
1110028F11Rik	0.500573	4.17787	-4.48534	0.00200259	0.0125446	-1.79098
Hpf1	0.499965	10.4829	-6.48494	0.00018482	0.00229448	0.774898
Zkscan17	0.49968	7.96702	-5.3244	0.000689616	0.00577853	-0.64598
Mxd3	0.499537	6.62418	-6.44068	0.000193742	0.00236656	0.723982
Tsr3	0.498736	8.42704	-6.58246	0.000166721	0.00214375	0.886201
Nfatc1	0.498537	10.6239	-5.59928	0.000496932	0.00458437	-0.292786
1810034E14Rik	0.498389	5.19036	-5.68033	0.000452043	0.00431241	-0.190668
G730007D18Rik	0.498175	6.93925	-4.25726	0.00272364	0.0157128	-2.11958
Dhcr7	0.498071	10.3918	-6.93566	0.000115826	0.00167759	1.2795
4930426L09Rik	0.497752	4.56524	-7.35128	7.67669e-05	0.00124165	1.72339
Pomk	0.497182	6.69598	-5.59696	0.000498286	0.00459297	-0.295719
Grk6	0.497162	9.18245	-7.27823	8.24149e-05	0.00129956	1.64681
Rabgap1	0.496559	6.81527	-5.45424	0.000589969	0.00515977	-0.477815
Gins3	0.496429	6.87108	-4.91207	0.00114979	0.00846719	-1.19598
AI746446	0.496302	4.50544	-4.08684	0.00344447	0.0184929	-2.36979
Wdr5b	0.496094	6.49768	-4.41846	0.0021898	0.0134022	-1.88658
Prrg1	0.496068	5.43009	-6.87558	0.000123109	0.00174756	1.21366
Stk38	0.495024	7.9516	-5.34584	0.000671964	0.00566898	-0.618046
Ublcp1	0.494985	5.95628	-3.9354	0.00425877	0.021451	-2.59532
Gtpbp3	0.49492	5.53013	-7.02597	0.000105759	0.00156525	1.37765
Efnb2	0.494917	4.66537	-5.63803	0.00047489	0.00444684	-0.243851
H2afz	0.494409	11.9551	-5.5293	0.00053964	0.00482289	-0.381691
Gpr146	0.494044	4.53013	-5.65846	0.000463701	0.00437646	-0.218133
Synj2	0.493948	6.20815	-6.73208	0.00014264	0.00190829	1.05466
Ccdc34	0.493944	4.51537	-5.83743	0.000377185	0.00379847	0.00467334
Slc17a5	0.493234	7.73968	-5.36785	0.000654354	0.0055524	-0.589437
Desi1	0.493183	8.16172	-5.84748	0.00037288	0.00376789	0.0170636
Dapl1	0.493117	6.91727	-4.90074	0.00116647	0.00855355	-1.21145
Vcp	0.493032	11.3869	-6.43193	0.000195561	0.0023831	0.713891
Rnaset2a	0.492717	6.01991	-3.35435	0.00990509	0.0393842	-3.48543
Reep4	0.492144	8.24753	-7.01809	0.000106598	0.0015731	1.36913
Tmem209	0.491676	8.16974	-4.86901	0.00121456	0.00880499	-1.25484
Wdr34	0.491486	6.02749	-5.55159	0.000525614	0.00473838	-0.353296
Ccdc173	0.491467	6.52142	-6.77344	0.000136681	0.00184907	1.10074
Rpap1	0.491182	7.25169	-5.75944	0.00041249	0.0040458	-0.0918803
Faah	0.490852	9.43419	-6.13606	0.000269703	0.00299814	0.36676
Dmac2l	0.490241	7.58097	-4.6639	0.00158252	0.0106553	-1.53883
Igf1r	0.490166	5.60106	-6.86928	0.000123902	0.00175249	1.20673
Prkcq	0.489669	12.0671	-6.72088	0.000144303	0.00192426	1.04215
Scai	0.48966	7.87974	-5.8983	0.000351936	0.00361254	0.0794549
Scrib	0.489296	7.5953	-5.05796	0.000956913	0.00738627	-0.998587
Lax1	0.489169	11.6145	-5.34706	0.000670974	0.00566297	-0.616459
Fcsk	0.489026	7.89977	-3.43998	0.00872182	0.0360091	-3.3521
Dpf2	0.488694	9.73555	-4.92218	0.00113515	0.00838342	-1.18221
Crip1	0.488548	10.944	-4.18204	0.00301945	0.0169403	-2.22953
Hdac10	0.488344	4.56256	-5.11597	0.000890284	0.00700915	-0.920949
Rinl	0.488018	10.373	-5.02123	0.00100191	0.00764153	-1.048
B4galt7	0.48791	10.8008	-6.10401	0.000279437	0.00307786	0.328477
Slc33a1	0.487234	8.11602	-4.12472	0.0032681	0.0178488	-2.31383
Tfr2	0.486601	4.68671	-3.16085	0.0132475	0.0483182	-3.7888
Gyg	0.486053	10.2095	-6.86144	0.000124895	0.00176167	1.19811
Rsrc1	0.485923	7.33346	-4.37263	0.00232903	0.0140437	-1.95246
Hook3	0.485357	8.69059	-5.90564	0.00034902	0.00359459	0.0884343
Cyp2s1	0.485109	4.88817	-5.84261	0.000374959	0.0037826	0.0110628
Ttc4	0.485048	8.16225	-6.56421	0.000169953	0.00217004	0.865462
Poglut2	0.484959	8.55004	-3.98359	0.00397922	0.0204434	-2.52323
Rps6ka5	0.4849	6.76035	-5.09028	0.000919149	0.00716489	-0.955277
Kif13a	0.484839	6.61798	-4.0882	0.00343795	0.0184772	-2.36777
Cmtm3	0.484426	7.91179	-5.17141	0.000831318	0.00665736	-0.847204
Zfyve21	0.484255	5.59438	-3.65076	0.00640267	0.0288662	-3.02684
Golga2	0.484176	9.28938	-6.14132	0.00026814	0.00298712	0.373035
Iffo2	0.484045	8.50463	-4.21492	0.00288612	0.016429	-2.18139
Kif13b	0.484008	6.37018	-4.77454	0.00137096	0.00958189	-1.38489
Lgals1	0.483375	13.1024	-5.22131	0.000781882	0.00635503	-0.781207
Slc12a2	0.483291	8.05437	-5.4905	0.000565041	0.00498427	-0.431279
Eml2	0.483198	8.83392	-5.63902	0.000474342	0.00444417	-0.242607
Tchp	0.483153	7.63401	-4.51266	0.00193115	0.0122279	-1.75211
Mmgt1	0.482766	8.14321	-4.08739	0.00344182	0.0184896	-2.36897
Tmem106a	0.481501	6.82143	-5.6686	0.000458256	0.0043511	-0.205393
Brwd3	0.481401	5.73033	-6.77606	0.000136313	0.00184652	1.10366
Coq8b	0.480975	7.18616	-5.76414	0.000410262	0.00403166	-0.0860361
5330433J24Rik	0.480448	3.84889	-3.91982	0.00435359	0.0218101	-2.61869
Arfip1	0.480396	10.3389	-5.43871	0.000601009	0.00522957	-0.497798
Castor1	0.480268	7.19861	-6.11102	0.000277275	0.00306392	0.336863
Mettl21a	0.480024	7.54974	-6.70903	0.000146085	0.00194297	1.02889
Rnf135	0.480007	7.6436	-4.90618	0.00115843	0.00852065	-1.20402
B3galt4	0.479796	6.77825	-3.22379	0.0120463	0.0451989	-3.68984
Lamtor1	0.479742	10.0834	-6.30959	0.000223074	0.00262179	0.571736
Rnf19a	0.47952	9.8206	-6.55442	0.000171716	0.00218198	0.854321
Hacd1	0.479316	2.90364	-3.8444	0.00484566	0.0235608	-2.73223
Ccl25	0.479224	6.88544	-4.59998	0.00172076	0.0112967	-1.62858
Gm11110	0.478777	7.22745	-4.76958	0.00137975	0.00962823	-1.39176
Cyth3	0.478774	7.59538	-6.1914	0.000253759	0.00286899	0.43256
9430040K09Rik	0.478729	4.303	-3.38219	0.00950284	0.0383121	-3.44201
Pdk2	0.478668	6.1283	-5.31015	0.00070163	0.00583856	-0.664584
Alox8	0.47808	6.16126	-3.28045	0.0110626	0.0427725	-3.60097
Fgf2	0.47782	3.4621	-4.16279	0.00310062	0.0172239	-2.2578
Pou2f2	0.477807	6.47856	-3.99808	0.0038991	0.0201987	-2.50162
Phgdh	0.477392	9.50649	-4.4413	0.00212383	0.0131144	-1.85386
Enpp1	0.477319	8.46515	-4.25144	0.00274538	0.015816	-2.12807
Ap1m1	0.477092	8.3507	-5.34318	0.000674123	0.00568486	-0.621503
Chaf1b	0.476598	5.573	-6.46951	0.000187877	0.00231283	0.757181
Nek7	0.476253	9.99751	-6.38481	0.000205689	0.00247418	0.659361
Sh3yl1	0.476174	4.67162	-3.28211	0.0110351	0.0427015	-3.59837
Washc1	0.475704	7.35635	-5.50881	0.000552898	0.00490162	-0.407858
Dnttip1	0.475585	8.65096	-4.7464	0.00142169	0.00985048	-1.42388
S100a3	0.475102	4.60938	-4.62017	0.00167573	0.0111047	-1.60017
Clk2	0.474448	9.39752	-5.42601	0.000610213	0.00528409	-0.514178
Atp5c1	0.474277	10.1145	-6.40514	0.000201251	0.00243939	0.68292
Snx30	0.474028	7.00015	-6.11778	0.00027521	0.00304512	0.344937
3110045A19Rik	0.473921	7.44535	-3.16799	0.0131052	0.0478671	-3.77756
Ift140	0.473906	9.80568	-5.66546	0.000459932	0.00436035	-0.209331
Fbxl8	0.473645	6.15987	-4.39064	0.00227321	0.0137729	-1.92654
Lsm10	0.473582	8.21779	-3.48071	0.00821236	0.0344855	-3.28891
Coro7	0.473562	9.36146	-6.38242	0.000206216	0.00247907	0.656596
Gm38403	0.473174	3.23979	-4.78512	0.00135239	0.009476	-1.37026
Sptan1	0.472997	9.31054	-5.83022	0.000380303	0.00381214	-0.00420989
Atp6v1g2	0.472365	7.20383	-3.65346	0.00637762	0.0288155	-3.0227
Rnf144a	0.472211	7.94222	-5.91891	0.000343811	0.00356663	0.104664
Als2	0.472194	5.9651	-6.66791	0.000152463	0.00199545	0.982745
Tbce	0.472191	10.3728	-4.98277	0.00105149	0.00791961	-1.09994
Gm15527	0.472103	5.3912	-3.69228	0.00602872	0.0276184	-2.96331
9130009M17Rik	0.472082	4.72868	-4.04725	0.00363976	0.0192595	-2.42845
Cfap126	0.471889	7.02945	-4.32312	0.00249025	0.0147694	-2.02396
Npepl1	0.471887	9.24191	-6.35525	0.000212336	0.00252599	0.625012
Zfp953	0.471741	7.58607	-3.18394	0.0127929	0.0471124	-3.75247
6720418B01Rik	0.471629	9.37458	-3.41364	0.00906902	0.037029	-3.39304
2700079J08Rik	0.471532	11.1479	-4.18943	0.00298893	0.0168248	-2.2187
Dipk1b	0.470435	5.79109	-6.3802	0.000206709	0.00247918	0.654019
Slf1	0.4697	7.79537	-4.82927	0.00127783	0.00914139	-1.30938
Hgs	0.469541	7.93992	-4.61829	0.00167986	0.0111145	-1.60281
Bod1l	0.469354	7.83766	-5.37851	0.000646009	0.00550207	-0.575606
Atp1a3	0.46918	4.06172	-6.0578	0.000294161	0.00319542	0.273035
Tbc1d10c	0.469024	11.1745	-5.66346	0.000461005	0.0043605	-0.211843
Mks1	0.468809	7.351	-5.51766	0.000547126	0.00486114	-0.396545
Parm1	0.468528	4.96802	-3.17339	0.0129986	0.0475965	-3.76907
Ube2l6	0.468511	3.65774	-4.26022	0.00271268	0.0156628	-2.11528
Kin	0.468366	10.1117	-5.21228	0.000790579	0.00639605	-0.793116
Klhdc2	0.468257	9.12489	-4.13456	0.00322388	0.017674	-2.29932
Tmem161b	0.467776	7.65625	-5.74141	0.000421155	0.00410916	-0.11431
Cmtm4	0.467648	7.05782	-3.62586	0.00663878	0.0295377	-3.06503
Lamtor3	0.467479	10.7	-5.06903	0.000943788	0.00731249	-0.983733
Pms2	0.46742	6.74562	-5.20187	0.000800746	0.00646301	-0.806873
Mtx2	0.467369	9.28399	-6.85923	0.000125177	0.00176323	1.19567
Vapb	0.466893	6.99889	-5.0913	0.000917981	0.00715851	-0.953909
Acp2	0.46684	8.73823	-5.35215	0.000666862	0.00563913	-0.609836
Cfap300	0.46652	3.60955	-5.95098	0.00033158	0.00348201	0.143765
Nfs1	0.466271	6.55899	-6.31545	0.000221663	0.0026112	0.578587
Arfgap1	0.465978	8.23822	-4.64993	0.00161167	0.0107948	-1.55839
Tbc1d22bos	0.465802	7.11379	-3.45495	0.0085308	0.0354095	-3.32886
Alg8	0.465378	8.04425	-5.92306	0.000342203	0.00355895	0.109725
Tkfc	0.465256	5.87237	-4.52177	0.00190793	0.0121182	-1.73916
Pdgfb	0.464834	4.6077	-4.21321	0.00289287	0.0164518	-2.18388
Wdr76	0.464797	7.28905	-6.78968	0.000134416	0.00182942	1.11879
Yipf1	0.464478	7.46314	-6.0787	0.000287398	0.00314025	0.298146
Zfp646	0.464418	6.73974	-5.7129	0.000435273	0.00420764	-0.149885
Ccdc141	0.464314	4.57467	-6.66674	0.000152649	0.0019966	0.98143
Pard6b	0.463985	5.81497	-5.83224	0.000379426	0.00380893	-0.00171826
Ndrg1	0.463965	5.68124	-4.8108	0.00130847	0.00927275	-1.33482
Map7	0.46378	7.53683	-4.87844	0.00120004	0.00872303	-1.24193
Zfp560	0.463736	6.79364	-3.85964	0.0047416	0.0232645	-2.70923
Sema4f	0.463267	6.5578	-4.80468	0.00131879	0.00931028	-1.34325
Zfp217	0.463121	11.2067	-4.64322	0.00162589	0.0108581	-1.56781
Dennd4b	0.463045	9.18374	-5.06537	0.000948106	0.00733209	-0.988643
Cd5	0.462484	10.8524	-6.47832	0.000186125	0.00230093	0.7673
3110073H01Rik	0.462468	9.50871	-6.81071	0.000131546	0.00181187	1.14209
Ahcy	0.46243	11.0324	-6.92872	0.000116643	0.00168705	1.27191
Dnaaf2	0.462338	7.63782	-4.59143	0.00174021	0.0113808	-1.64063
Ppcdc	0.461993	7.78599	-4.40067	0.00224276	0.0136353	-1.91212
2310029O18Rik	0.461882	6.11167	-3.82008	0.00501679	0.0241411	-2.76899
Rbbp9	0.461858	5.98793	-4.43977	0.00212818	0.0131229	-1.85605
Ajuba	0.461646	7.67934	-3.63517	0.00654937	0.0292777	-3.05073
Dhx35	0.461501	7.38635	-4.15792	0.00312152	0.0172605	-2.26496
Impa2	0.461012	7.71068	-5.74489	0.000419469	0.00409466	-0.109982
5730526G10Rik	0.460772	6.16837	-3.21791	0.0121535	0.0454183	-3.69907
Bloc1s2	0.460433	10.6823	-5.08052	0.000930377	0.00723317	-0.968338
Cenpc1	0.460293	8.7672	-4.68593	0.00153773	0.0104347	-1.50804
Agpat2	0.460104	7.17278	-4.27534	0.0026573	0.0154429	-2.09327
Mcm3ap	0.460038	9.3507	-4.97302	0.00106449	0.00798815	-1.11314
Hibadh	0.459918	8.74623	-5.86355	0.000366115	0.00371532	0.0368217
Sord	0.458987	5.02808	-4.90157	0.00116524	0.00855311	-1.21032
Setdb2	0.458776	8.51998	-5.68875	0.000447643	0.00429005	-0.180115
C030043A13Rik	0.458555	6.02179	-3.30269	0.0107	0.0417673	-3.56615
Pnpla6	0.458518	8.43422	-4.98066	0.0010543	0.00793785	-1.1028
Rmdn1	0.458124	6.06016	-3.57606	0.00713908	0.0310993	-3.14159
Trir	0.458113	10.976	-4.18173	0.00302076	0.0169403	-2.22999
Tmem18	0.45786	10.1598	-6.17899	0.000257242	0.00290197	0.417839
Arrdc1	0.457847	8.09315	-5.67693	0.000453832	0.0043231	-0.194928
Ctnnbip1	0.457722	5.138	-4.80788	0.00131338	0.00928512	-1.33884
Hes6	0.457544	8.34959	-5.0779	0.000933411	0.00724851	-0.97184
Ms4a3	0.457384	4.82531	-5.26831	0.000738234	0.00606335	-0.719356
Zfp367	0.457365	5.97247	-4.61314	0.00169126	0.0111567	-1.61005
Coch	0.457283	4.95529	-3.57951	0.00710316	0.0309929	-3.13628
Bcl9	0.457042	6.51709	-5.45298	0.000590858	0.00516315	-0.479438
Bap1	0.457018	9.35636	-3.87441	0.00464305	0.0228685	-2.68696
Nckipsd	0.456835	5.73619	-5.01471	0.00101013	0.0076928	-1.05679
Frg1	0.456609	11.7097	-5.5686	0.000515179	0.00467476	-0.331672
Fam207a	0.456481	8.04995	-4.39474	0.0022607	0.0137174	-1.92064
Pik3r4	0.45595	9.79874	-5.22938	0.000774192	0.00630576	-0.770566
Epn1	0.455903	8.3626	-4.22278	0.00285517	0.0163202	-2.16989
Zdhhc23	0.455626	7.71389	-5.1121	0.000894563	0.00703204	-0.926108
Med8	0.455428	8.30699	-6.19557	0.0002526	0.00286378	0.437502
Mturn	0.455093	6.59365	-6.03361	0.00030221	0.00325869	0.243889
Slc2a6	0.454802	6.49018	-3.23284	0.0118832	0.0448085	-3.67563
Uap1l1	0.454293	5.43953	-4.5106	0.00193644	0.0122462	-1.75503
Abhd8	0.454282	8.70081	-5.12716	0.000878021	0.00693657	-0.906025
D730048M19Rik	0.45397	5.57808	-3.96209	0.0041014	0.0208983	-2.55535
Cbx5	0.453808	7.45416	-4.11844	0.00329667	0.0179483	-2.3231
Zfp408	0.453783	9.20604	-6.76803	0.000137444	0.00185695	1.09473
Elp3	0.453522	7.54816	-6.03951	0.000300225	0.0032441	0.251005
Zfp688	0.453333	8.58935	-6.07965	0.000287098	0.00313904	0.299276
Ggta1	0.45317	6.82267	-5.13952	0.000864697	0.00687052	-0.889571
Rnf168	0.453029	7.83352	-3.94641	0.0041931	0.0212023	-2.57883
Ift46	0.452921	7.72793	-5.13586	0.000868618	0.00688616	-0.894439
Lage3	0.452732	8.05842	-3.48881	0.00811481	0.0341949	-3.27635
Sfmbt2	0.452431	6.835	-5.03252	0.000987831	0.00755103	-1.03279
1700021F05Rik	0.451607	9.10474	-5.76816	0.000408366	0.00402266	-0.0810388
4930539E08Rik	0.451593	7.22791	-4.86364	0.0012229	0.00884451	-1.2622
Itpa	0.451258	6.0244	-5.13755	0.000866804	0.00688242	-0.89219
4931406C07Rik	0.451119	5.0027	-4.5835	0.00175846	0.0114745	-1.6518
Rgs14	0.451068	8.181	-5.72085	0.000431285	0.00418808	-0.139954
Sirt6	0.450983	9.62855	-6.29904	0.00022564	0.00264589	0.559384
Ccdc163	0.450939	6.8661	-4.24392	0.00277372	0.0159658	-2.13902
Fut8	0.450488	7.4853	-4.63257	0.0016487	0.0109676	-1.58274
Fhl2	0.450018	6.93774	-5.65691	0.000464542	0.00438238	-0.220087
Cenpt	0.449936	8.16219	-5.01382	0.00101126	0.00769608	-1.05799
Glt8d1	0.449722	6.92839	-4.68942	0.00153076	0.010408	-1.50317
Smc6	0.449635	8.97429	-6.19233	0.0002535	0.00286776	0.433663
Rubcn	0.449618	7.17496	-5.15943	0.000843686	0.00673573	-0.863099
Tceanc	0.449605	8.46243	-5.00786	0.00101885	0.00773055	-1.06604
Pycard	0.449531	8.14639	-5.65039	0.000468085	0.0044064	-0.228284
Egf	0.449398	5.81889	-3.40982	0.00912055	0.0371885	-3.39898
Zcchc8	0.449312	7.34271	-4.87276	0.00120875	0.00876911	-1.2497
Ccdc181	0.449201	7.27348	-5.27701	0.000730454	0.00601642	-0.707947
Snx10	0.449011	7.72213	-6.26361	0.000234497	0.00271099	0.517806
Zfp558	0.44846	4.05611	-4.9286	0.00112595	0.00833347	-1.17346
1700052K11Rik	0.448405	7.43337	-4.10115	0.00337665	0.0182795	-2.34862
Ube2m	0.448128	7.82051	-4.87908	0.00119907	0.00872044	-1.24106
Ddhd2	0.448108	7.43645	-5.28794	0.000720806	0.00595369	-0.693626
Arhgap5	0.447985	7.19548	-3.73671	0.00565418	0.0263429	-2.89554
Zfp69	0.447971	5.77583	-4.52879	0.00189028	0.0120397	-1.72921
Ccdc50	0.447433	8.08098	-4.39769	0.00225175	0.0136712	-1.9164
Ssbp3	0.446593	9.78702	-5.2989	0.000711271	0.0058963	-0.679284
Tacc2	0.446327	8.09909	-5.08946	0.000920083	0.00716831	-0.95637
Apobec3	0.445993	11.9288	-5.71113	0.00043617	0.00421357	-0.152106
Mtor	0.445957	7.30224	-6.21054	0.00024849	0.00282655	0.455219
Crybg3	0.445713	8.07479	-5.27142	0.000735442	0.00604778	-0.715275
Arv1	0.445474	7.57159	-3.57227	0.00717878	0.0311838	-3.14743
Cyp20a1	0.445137	7.16614	-5.0476	0.000969371	0.00744043	-1.0125
Tango2	0.445028	7.07822	-5.42493	0.000611	0.00528734	-0.515566
Tyms-ps	0.44464	4.9195	-5.32459	0.000689457	0.00577853	-0.645732
Gpr137b-ps	0.44441	8.65304	-4.81107	0.00130802	0.00927275	-1.33445
6030445D17Rik	0.444019	3.70822	-4.6157	0.00168558	0.0111288	-1.60645
Ift122	0.443853	4.67165	-6.27729	0.000231033	0.00269363	0.533876
Zfp626	0.443848	7.38611	-3.50872	0.0078804	0.0334269	-3.24555
Pck2	0.443841	7.15885	-5.01321	0.00101203	0.00769873	-1.05881
Slc4a2	0.443502	9.79609	-5.12227	0.000883363	0.00696914	-0.912552
Fam192a	0.443356	9.32661	-4.7017	0.00150649	0.0102818	-1.48603
Topbp1	0.443294	8.13862	-4.65586	0.00159924	0.0107326	-1.55009
Nlrc3	0.443274	9.37003	-3.56493	0.00725632	0.0313966	-3.15875
Slc9a9	0.442993	8.14246	-4.63666	0.0016399	0.010932	-1.577
Tmem86a	0.442677	6.96278	-3.17073	0.013051	0.0477457	-3.77325
Klhl17	0.442576	9.23698	-4.32542	0.00248248	0.0147475	-2.02062
Gltp	0.442307	12.0262	-6.83473	0.000128349	0.00178463	1.16866
Trmt11	0.442284	6.22765	-3.56228	0.00728453	0.0314839	-3.16283
Unc13d	0.442167	9.41357	-5.96298	0.000327126	0.00344405	0.158365
Abcd4	0.441862	6.99711	-5.58811	0.000503495	0.00460848	-0.306933
4930466K18Rik	0.441804	5.91843	-4.94292	0.00110573	0.0082254	-1.15399
Cspp1	0.44166	6.72038	-4.42595	0.00216793	0.013308	-1.87584
Acap1	0.441275	10.888	-3.15753	0.0133143	0.0484927	-3.79402
Sox4	0.441241	4.52167	-4.44988	0.0020996	0.0130152	-1.84159
Ints6l	0.441079	8.90763	-3.60937	0.00680014	0.0300161	-3.09035
9530078B04Rik	0.440904	4.44067	-4.55195	0.00183321	0.0118045	-1.69638
Rars2	0.440673	9.12697	-5.74652	0.000418682	0.00408893	-0.107956
Bpgm	0.440239	7.4247	-5.09192	0.000917275	0.00715572	-0.953081
Reps1	0.440216	11.2414	-5.09919	0.000909021	0.00711026	-0.943357
Slc30a6	0.439597	9.61207	-6.00866	0.000310766	0.00332472	0.213751
Cab39l	0.439445	7.79435	-4.38066	0.00230396	0.0139343	-1.94089
Acads	0.439427	8.01638	-6.54483	0.000173462	0.00219873	0.843392
Slc38a7	0.439396	7.22997	-5.89426	0.00035355	0.00362374	0.0745145
Rhot2	0.438857	7.54191	-5.51741	0.00054729	0.00486114	-0.396867
Hsd3b7	0.438775	5.11135	-3.25278	0.0115319	0.043977	-3.64434
Phf10	0.438628	8.7669	-3.65784	0.00633719	0.0286592	-3.01599
2610301B20Rik	0.438065	4.61742	-5.71441	0.000434513	0.00420549	-0.147999
Ankrd23	0.437914	6.9843	-4.48449	0.00200483	0.0125549	-1.79218
Zdhhc12	0.437763	7.29304	-5.04072	0.000977753	0.00748516	-1.02176
Cers6	0.437756	9.38711	-5.47366	0.000576472	0.00506116	-0.45287
Gon4l	0.43767	10.9239	-5.8823	0.000358385	0.00365133	0.0598533
Dnm1l	0.437521	8.54446	-5.52403	0.000543015	0.00484299	-0.388413
Zfp467	0.437483	6.37483	-4.66816	0.00157377	0.0106188	-1.53288
Rab40c	0.437433	5.80453	-3.61432	0.00675131	0.0298411	-3.08275
Gm10785	0.437426	5.449	-3.37024	0.00967335	0.0387411	-3.46064
Tmcc1	0.437254	7.06097	-4.828	0.00127992	0.00914348	-1.31113
Mthfd2	0.437183	9.78514	-5.27203	0.000734904	0.00604579	-0.714487
Coq9	0.437125	7.56288	-4.49958	0.00196499	0.0123732	-1.7707
Twsg1	0.436832	6.54684	-5.80826	0.000389986	0.00388263	-0.0313436
Nckap1l	0.436737	10.1976	-6.44736	0.000192365	0.00235119	0.731685
Pcyox1l	0.436735	5.22757	-5.27491	0.000732324	0.0060294	-0.7107
Insig2	0.436726	8.17963	-3.39719	0.00929326	0.0377417	-3.41865
Kmt2b	0.436664	9.27899	-3.76282	0.00544571	0.025622	-2.85582
Scd2	0.436542	8.76172	-3.6298	0.00660082	0.0294232	-3.05898
C80012	0.436375	7.30402	-3.64193	0.00648535	0.02911	-3.04037
Polm	0.436262	7.45296	-4.82106	0.00129136	0.00920237	-1.32069
Cox7a1	0.436157	4.64353	-4.11245	0.00332411	0.0180677	-2.33193
Ankrd13d	0.436129	6.86035	-5.99263	0.000316399	0.00336468	0.194356
Ndufv2	0.435797	10.2303	-5.98382	0.000319546	0.00338161	0.183673
Zfp579	0.435734	8.79102	-5.57115	0.000513635	0.00467098	-0.328436
9030419F21Rik	0.435683	6.98684	-5.14444	0.000859452	0.00683727	-0.883023
Zfp28	0.435585	4.90299	-6.68338	0.000150027	0.00197491	1.00013
8030448K23Rik	0.43544	5.41834	-4.26419	0.002698	0.0156088	-2.10949
Ica1	0.435394	5.12031	-5.32823	0.000686424	0.00576501	-0.640982
Pstk	0.435247	5.85649	-6.1726	0.000259055	0.0029128	0.410256
Cnot3	0.434979	7.55583	-3.78837	0.00524964	0.0249346	-2.81702
Acadm	0.434895	8.63096	-6.38656	0.000205303	0.00247099	0.661389
Rad9a	0.434567	8.46351	-5.45354	0.000590463	0.00516189	-0.478717
Kyat3	0.434553	5.75796	-3.44977	0.00859635	0.0356133	-3.33689
Il9r	0.434301	3.24301	-3.36121	0.0098043	0.0390827	-3.47472
Ticrr	0.433792	5.75466	-5.68558	0.000449292	0.00430183	-0.184081
Adck5	0.433706	8.1599	-5.69653	0.000443614	0.00426806	-0.170362
Odf2l	0.433431	6.48496	-4.29507	0.0025869	0.0151542	-2.06462
Top1mt	0.43327	7.65045	-6.47243	0.000187295	0.00231031	0.760531
Ankrd54	0.433201	8.64392	-5.90278	0.000350152	0.0035987	0.084939
Trim28	0.433013	10.8153	-5.59555	0.000499115	0.00459514	-0.297511
Oas1c	0.433009	7.80688	-4.65954	0.00159156	0.0106882	-1.54494
Tmem94	0.432926	7.20836	-3.98839	0.00395248	0.0203611	-2.51607
Tmem138	0.432635	5.89467	-4.44519	0.0021128	0.0130792	-1.8483
Nsd1	0.431906	8.81644	-4.43357	0.00214593	0.0132046	-1.86493
Zbtb5	0.431351	6.41363	-3.77647	0.00534002	0.0252285	-2.83509
Naglu	0.431217	6.99141	-5.0546	0.000960943	0.0074038	-1.00311
Cep41	0.430219	6.50009	-6.61167	0.000161688	0.00209083	0.919302
Cby1	0.430143	6.21607	-4.79433	0.00133646	0.0093888	-1.35754
A930016O22Rik	0.429806	3.9718	-5.22788	0.000775612	0.00631231	-0.772539
2700049A03Rik	0.42936	7.4441	-4.5188	0.00191548	0.0121474	-1.74339
E230016M11Rik	0.429188	5.1768	-5.29936	0.000710877	0.00589542	-0.678687
Rpa2	0.428854	8.97461	-3.82358	0.00499174	0.0240924	-2.76369
Gnb1l	0.428805	6.62938	-5.38123	0.000643899	0.00549035	-0.572082
Slfn9	0.428384	7.36432	-4.46183	0.00206634	0.012881	-1.82451
Stat5a	0.42837	8.10234	-5.917	0.000344554	0.00356712	0.102334
Nhsl2	0.428212	4.78796	-4.28195	0.00263349	0.0153427	-2.08367
Arpc5l	0.427976	8.10025	-4.17823	0.00303535	0.0169862	-2.23513
Stradb	0.427816	5.39083	-4.0711	0.00352073	0.0187794	-2.39308
Ccdc125	0.427486	7.32713	-5.32377	0.000690141	0.00577954	-0.6468
Fam45a	0.427269	7.80446	-4.1696	0.00307163	0.0171185	-2.24779
Zfp788	0.426958	7.51343	-4.04254	0.00366379	0.0193412	-2.43545
St3gal5	0.426885	5.95724	-3.36306	0.00977735	0.03902	-3.47184
Tmod1	0.42682	10.4041	-5.83714	0.00037731	0.00379847	0.0043154
Ano6	0.426712	9.37302	-4.79898	0.00132849	0.00935326	-1.35112
Rundc1	0.426663	8.05654	-3.86769	0.0046876	0.0230658	-2.69709
Thada	0.426607	7.48121	-3.6276	0.0066219	0.0294787	-3.06235
Mms19	0.426541	8.43881	-5.75637	0.000413949	0.00405429	-0.095689
Cptp	0.426458	6.35187	-3.71322	0.00584899	0.0269991	-2.93134
Tctn1	0.42639	6.57707	-5.91727	0.00034445	0.00356712	0.102662
Purg	0.42632	5.39614	-4.18858	0.0029924	0.0168325	-2.21994
Cdk2	0.426094	5.47379	-5.89491	0.000353292	0.00362374	0.0753043
Faf2	0.426086	8.86903	-5.71542	0.000434009	0.00420432	-0.146747
Stat5b	0.426041	8.91568	-5.89381	0.000353734	0.00362374	0.0739533
Golga1	0.425725	6.56791	-5.08526	0.000924899	0.00719604	-0.961986
Paxip1	0.425576	8.57578	-5.7654	0.000409665	0.00402965	-0.0844648
Tanc2	0.425446	4.30762	-4.27564	0.00265623	0.0154412	-2.09284
Pus10	0.425405	7.92305	-4.78272	0.00135659	0.00950213	-1.37358
Dlg3	0.425263	9.02166	-3.46554	0.00839832	0.034987	-3.31242
Gnai2	0.425215	11.4091	-6.10947	0.000277751	0.00306753	0.335012
Pld1	0.425153	3.56972	-3.93062	0.0042876	0.0215684	-2.60248
Ppil2	0.425107	8.35328	-4.31103	0.0025314	0.0149357	-2.04146
Cfp	0.425084	7.50198	-4.09851	0.00338905	0.0183055	-2.35252
2900026A02Rik	0.425048	5.3489	-5.66451	0.000460444	0.00436035	-0.21053
Neurl4	0.424931	8.1724	-3.95607	0.00413636	0.021019	-2.56436
D8Ertd51e	0.424912	5.12646	-3.36965	0.00968183	0.038767	-3.46156
Bin3	0.42477	9.1724	-6.53144	0.000175934	0.00222025	0.828112
Zswim1	0.424674	7.45001	-5.58732	0.000503963	0.00460848	-0.307937
Chd9	0.424593	7.97067	-5.90958	0.000347461	0.00358635	0.0932648
2310043L19Rik	0.424497	4.85425	-4.81221	0.0013061	0.00926882	-1.33288
Tpp1	0.424482	9.93813	-5.94503	0.000333811	0.00349649	0.136526
Hyls1	0.424386	6.59691	-3.40102	0.0092405	0.0375713	-3.41268
[truncated: 3,708 more rows]
