# Supplementary material for: Longitudinal analysis of invariant natural killer T cell activation reveals a cMAF-associated transcriptional state of NKT10 cells
Source: eLife. 2022 Dec 2;11:e76586. doi: 10.7554/eLife.76586 (PMC9831610; doi:10.7554/eLife.76586)
Supplement: Supplementary file 9. [file elife-76586-supp9.xlsx]

## Sheet: Sheet1
Biological Sample	Batch Number	Lane load number	Antibody Tag	Hashtag_ID	Raw cell number	Median Genes per cell	Median UMIs per cell	GEO Code
Steady State Adipose iNKT cells	1	1	No	NA	3445	2106	6031	GSE142845
Adipose iNKT cells 4-hours post-⍺GalCer	1	2	No	NA	3663	1714	4567	GSE190201
Steady State Splenic iNKT cells	1	3	Yes	Hashtag_1	6482	1474	3475	GSE142845
Splenic iNKT cells 4-hours post-⍺GalCer	1	3	Yes	Hashtag_2	4865	1677	5592	GSE142845
Adipose iNKT cells 72-hours post-⍺GalCer	2	4	No	NA	8305	3213	12773	GSE190201
Splenic iNKT cells 72-hours post-⍺GalCer	2	5	No	NA	8360	3031	11799	GSE190201
⍺GalCer-pretreated Steady State Adipose iNKT cells	3	6	Yes	Hashtag_2	3931	1735	4269	GSE190201
⍺GalCer-pretreated Steady State Splenic iNKT cells	3	6	Yes	Hashtag_3	2645	1925	5059	GSE190201
⍺GalCer-pretreated Splenic iNKT cells 4-hours post-⍺GalCer	3	6	Yes	Hashtag_4	4455	2021	6359	GSE190201
