# Supplementary figures and images for: Longitudinal analysis of invariant natural killer T cell activation reveals a cMAF-associated transcriptional state of NKT10 cells
Source: eLife journal article supplement (doi:10.7554/elife.76586), 2022-12-02

Figure 3-figure supplement 1

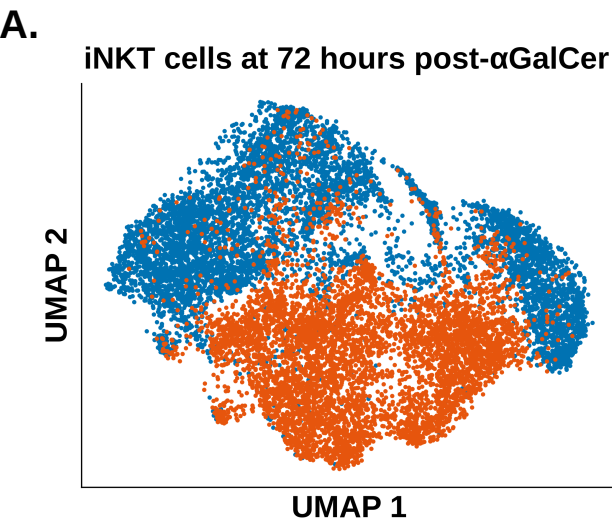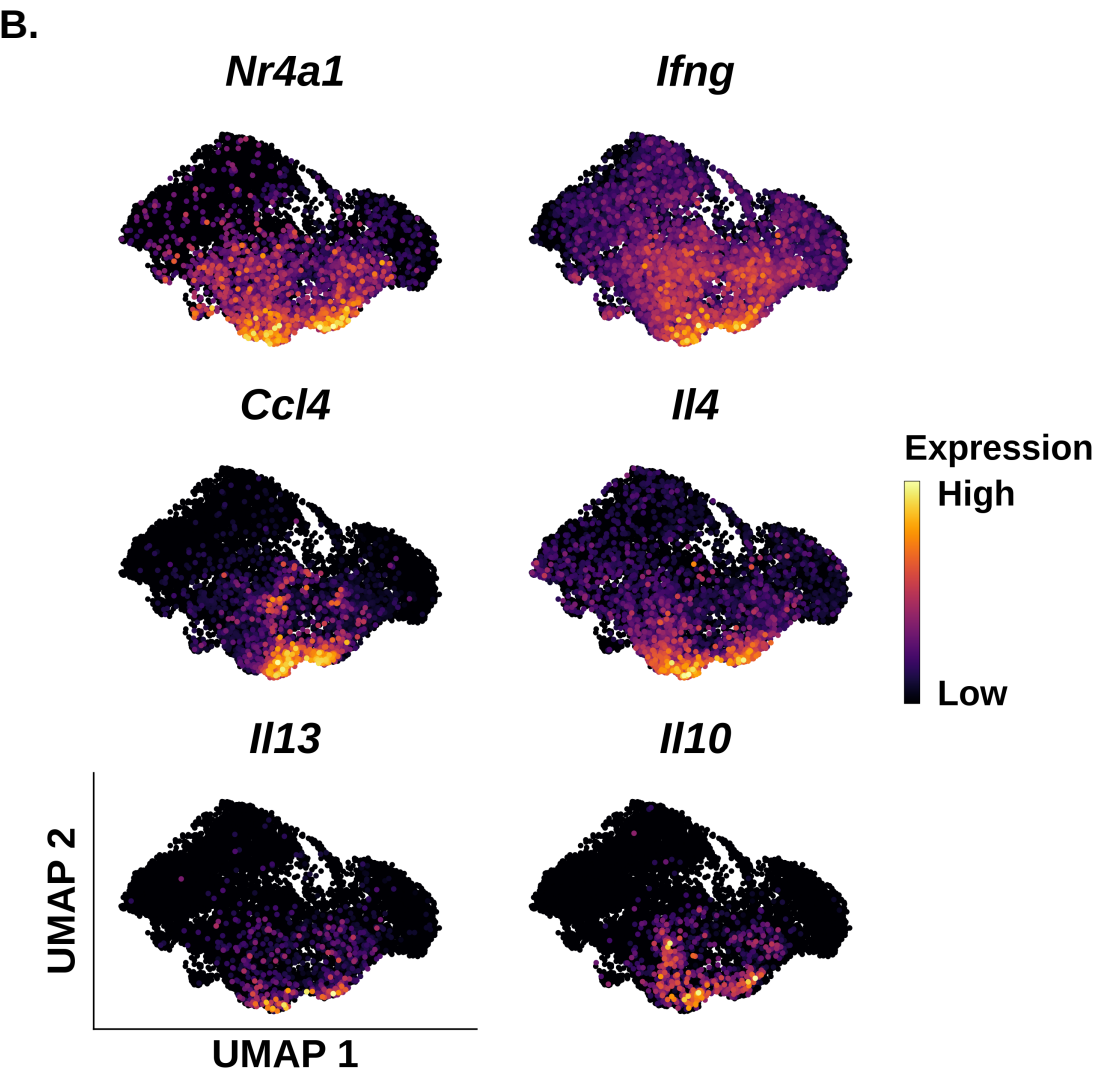

Supplement: supp [file elife-76586-supp-v1.zip]

Figure 7-figure supplement 1

A.

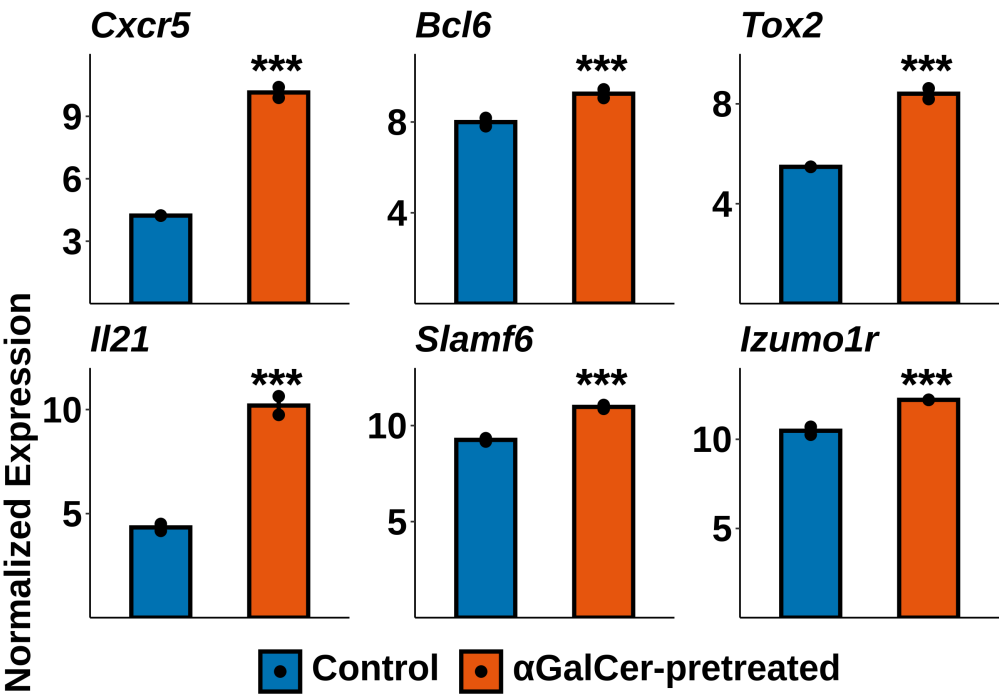

B.

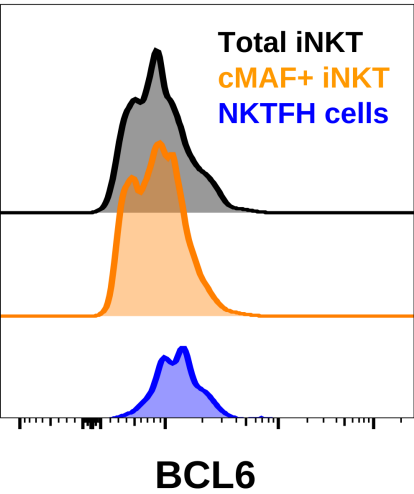

C.

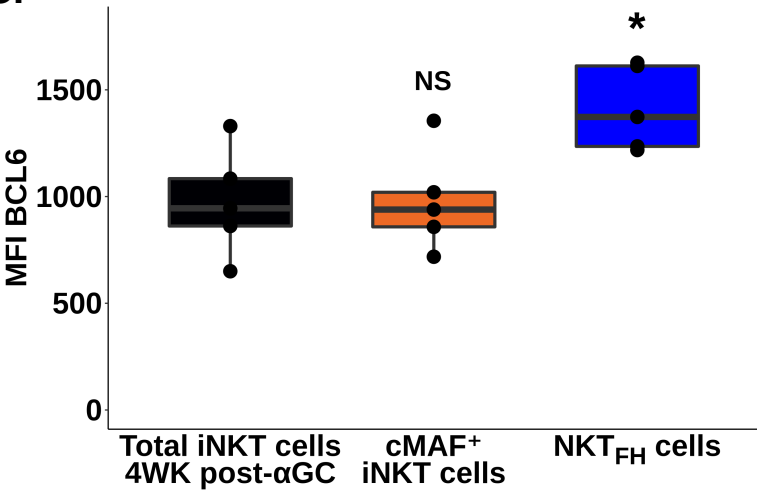

D.

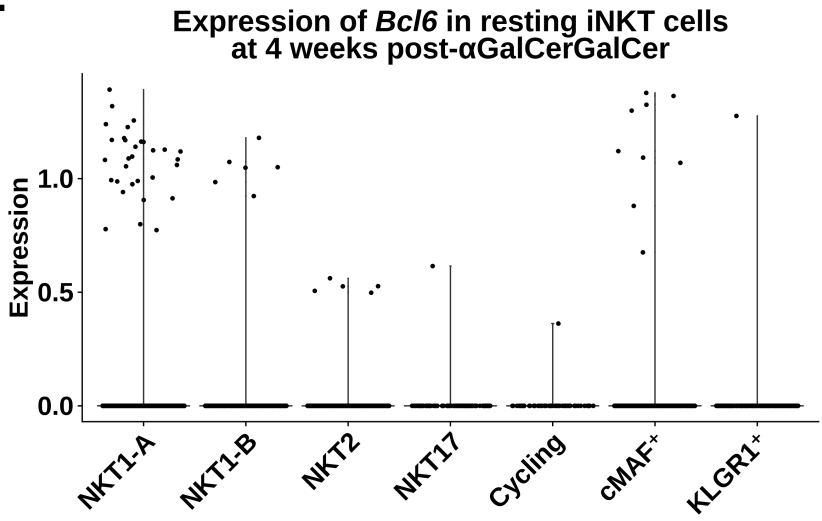

Supplement: supp [file elife-76586-supp-v1.zip]

Figure 2-figure supplement 4

A.

CD44<sup>+</sup> BALB/c thymic iNKT cells

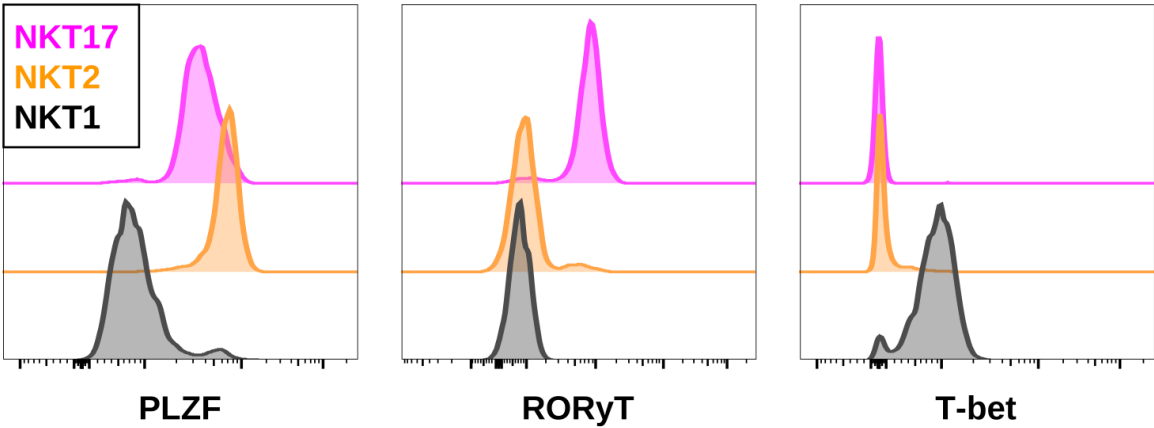

Supplement: supp [file elife-76586-supp-v1.zip]

Figure 1-figure supplement 2

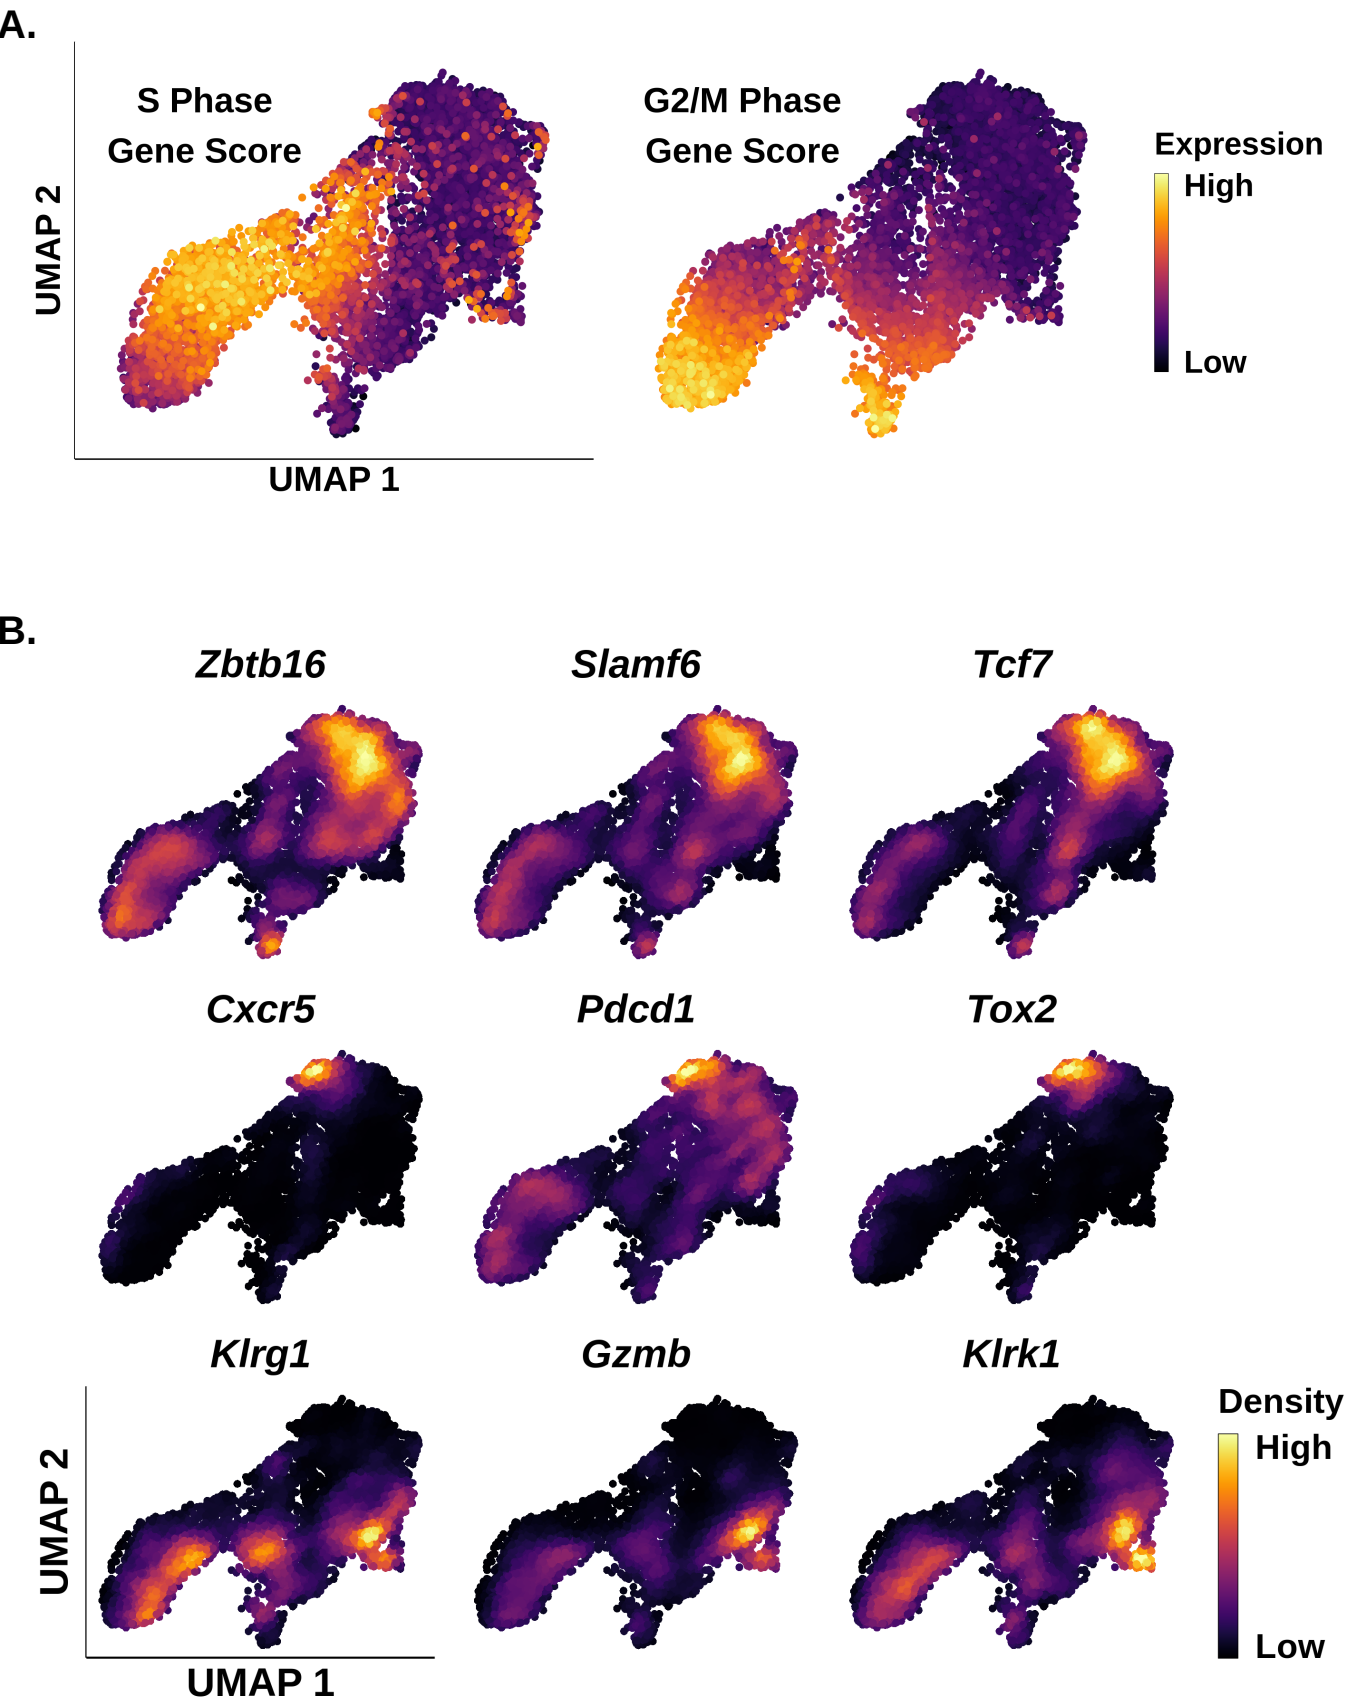

Supplement: supp [file elife-76586-supp-v1.zip]

Figure 2-figure supplement 5

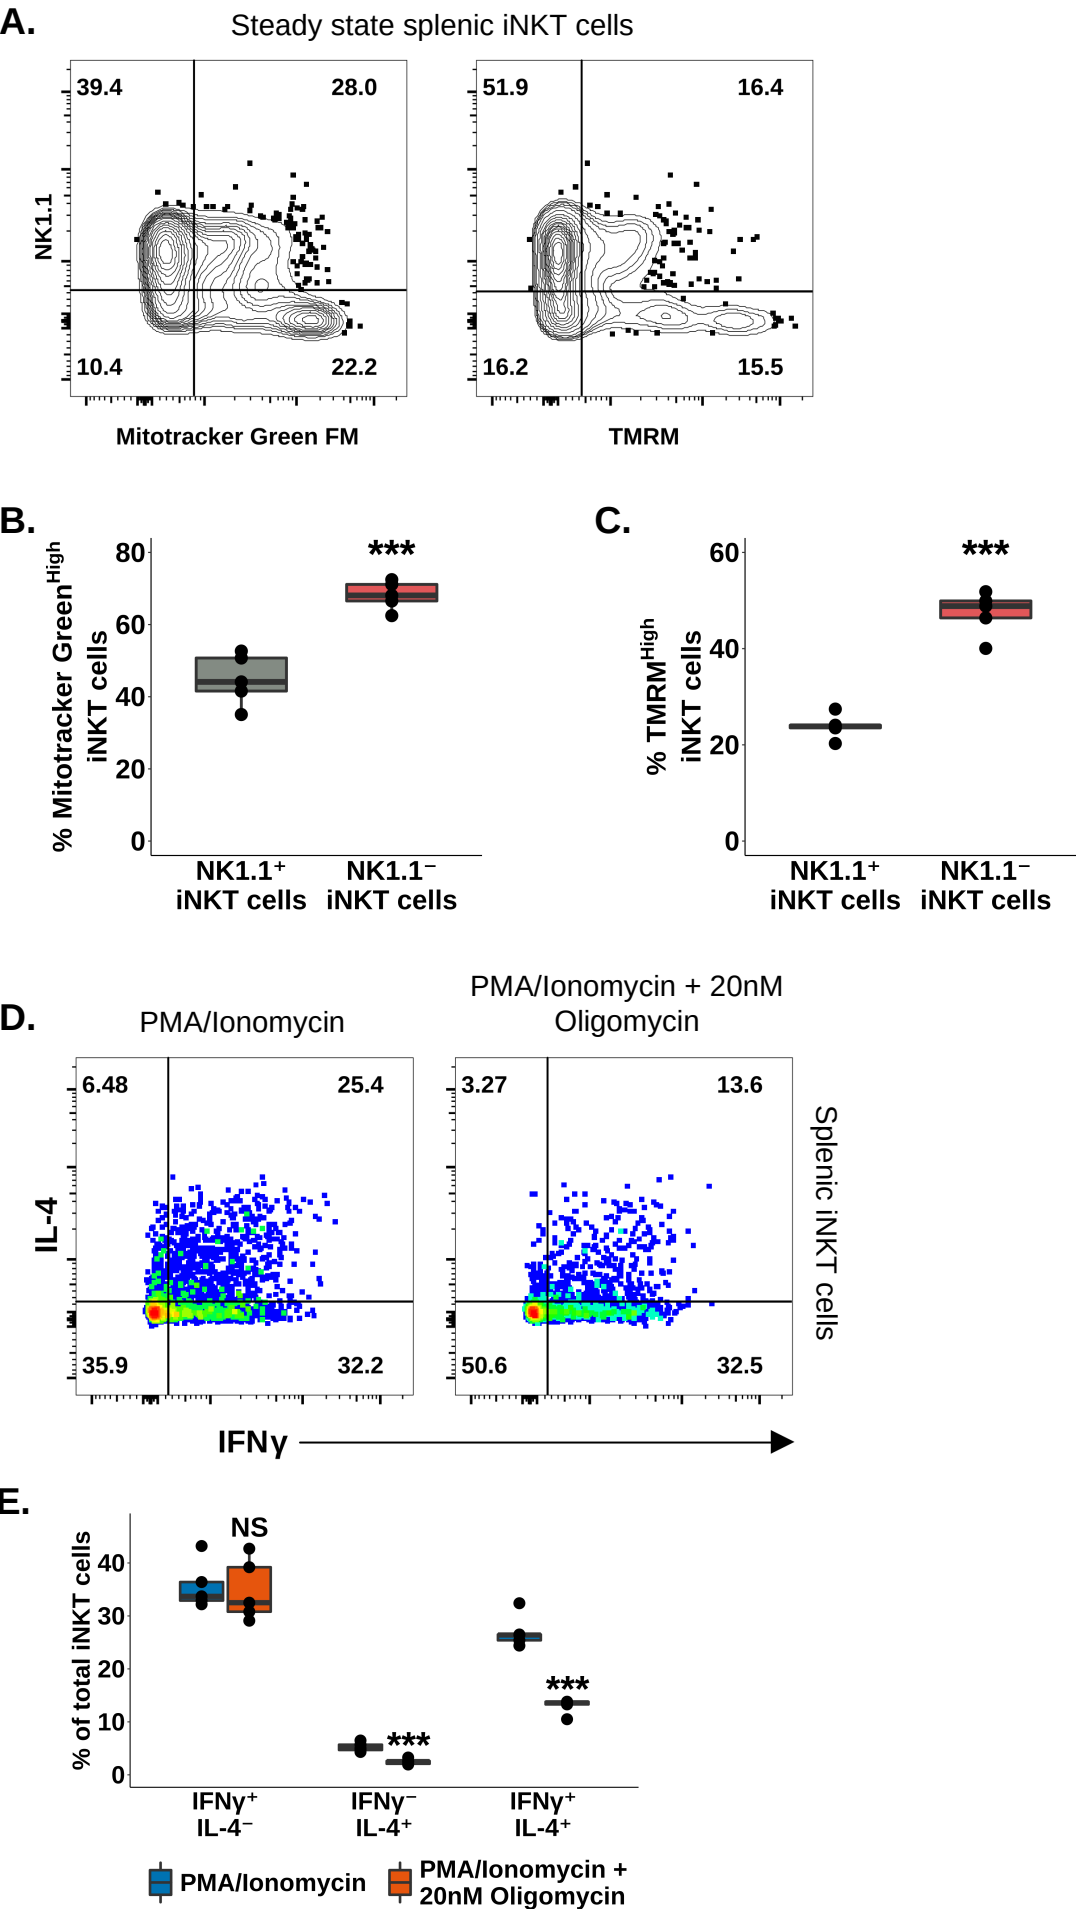

Supplement: supp [file elife-76586-supp-v1.zip]

Figure 2-figure supplement 1

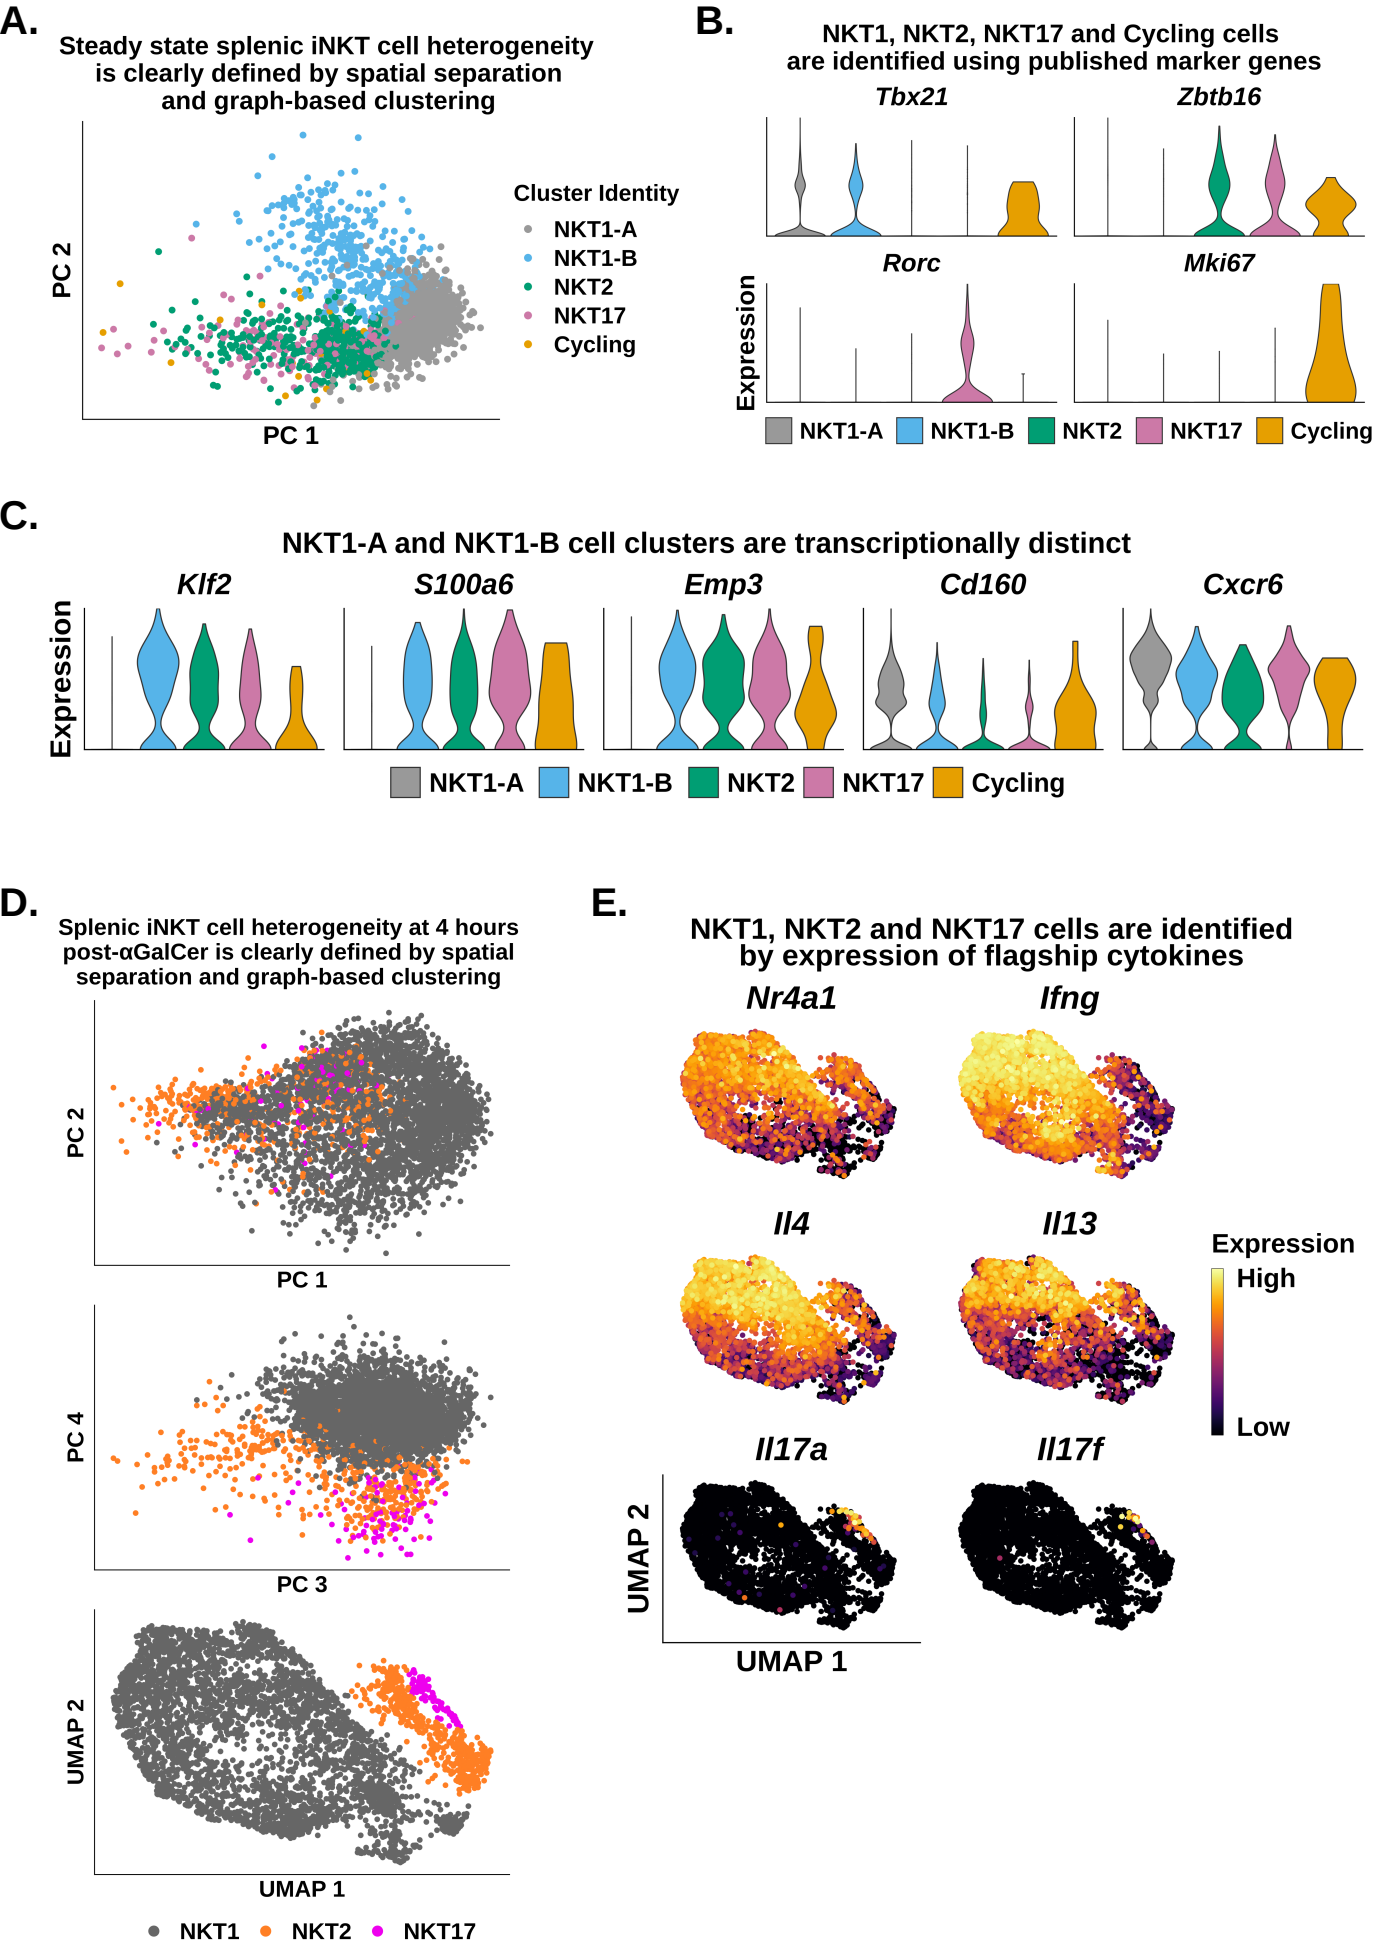

Supplement: supp [file elife-76586-supp-v1.zip]

Figure 6-figure supplement 5

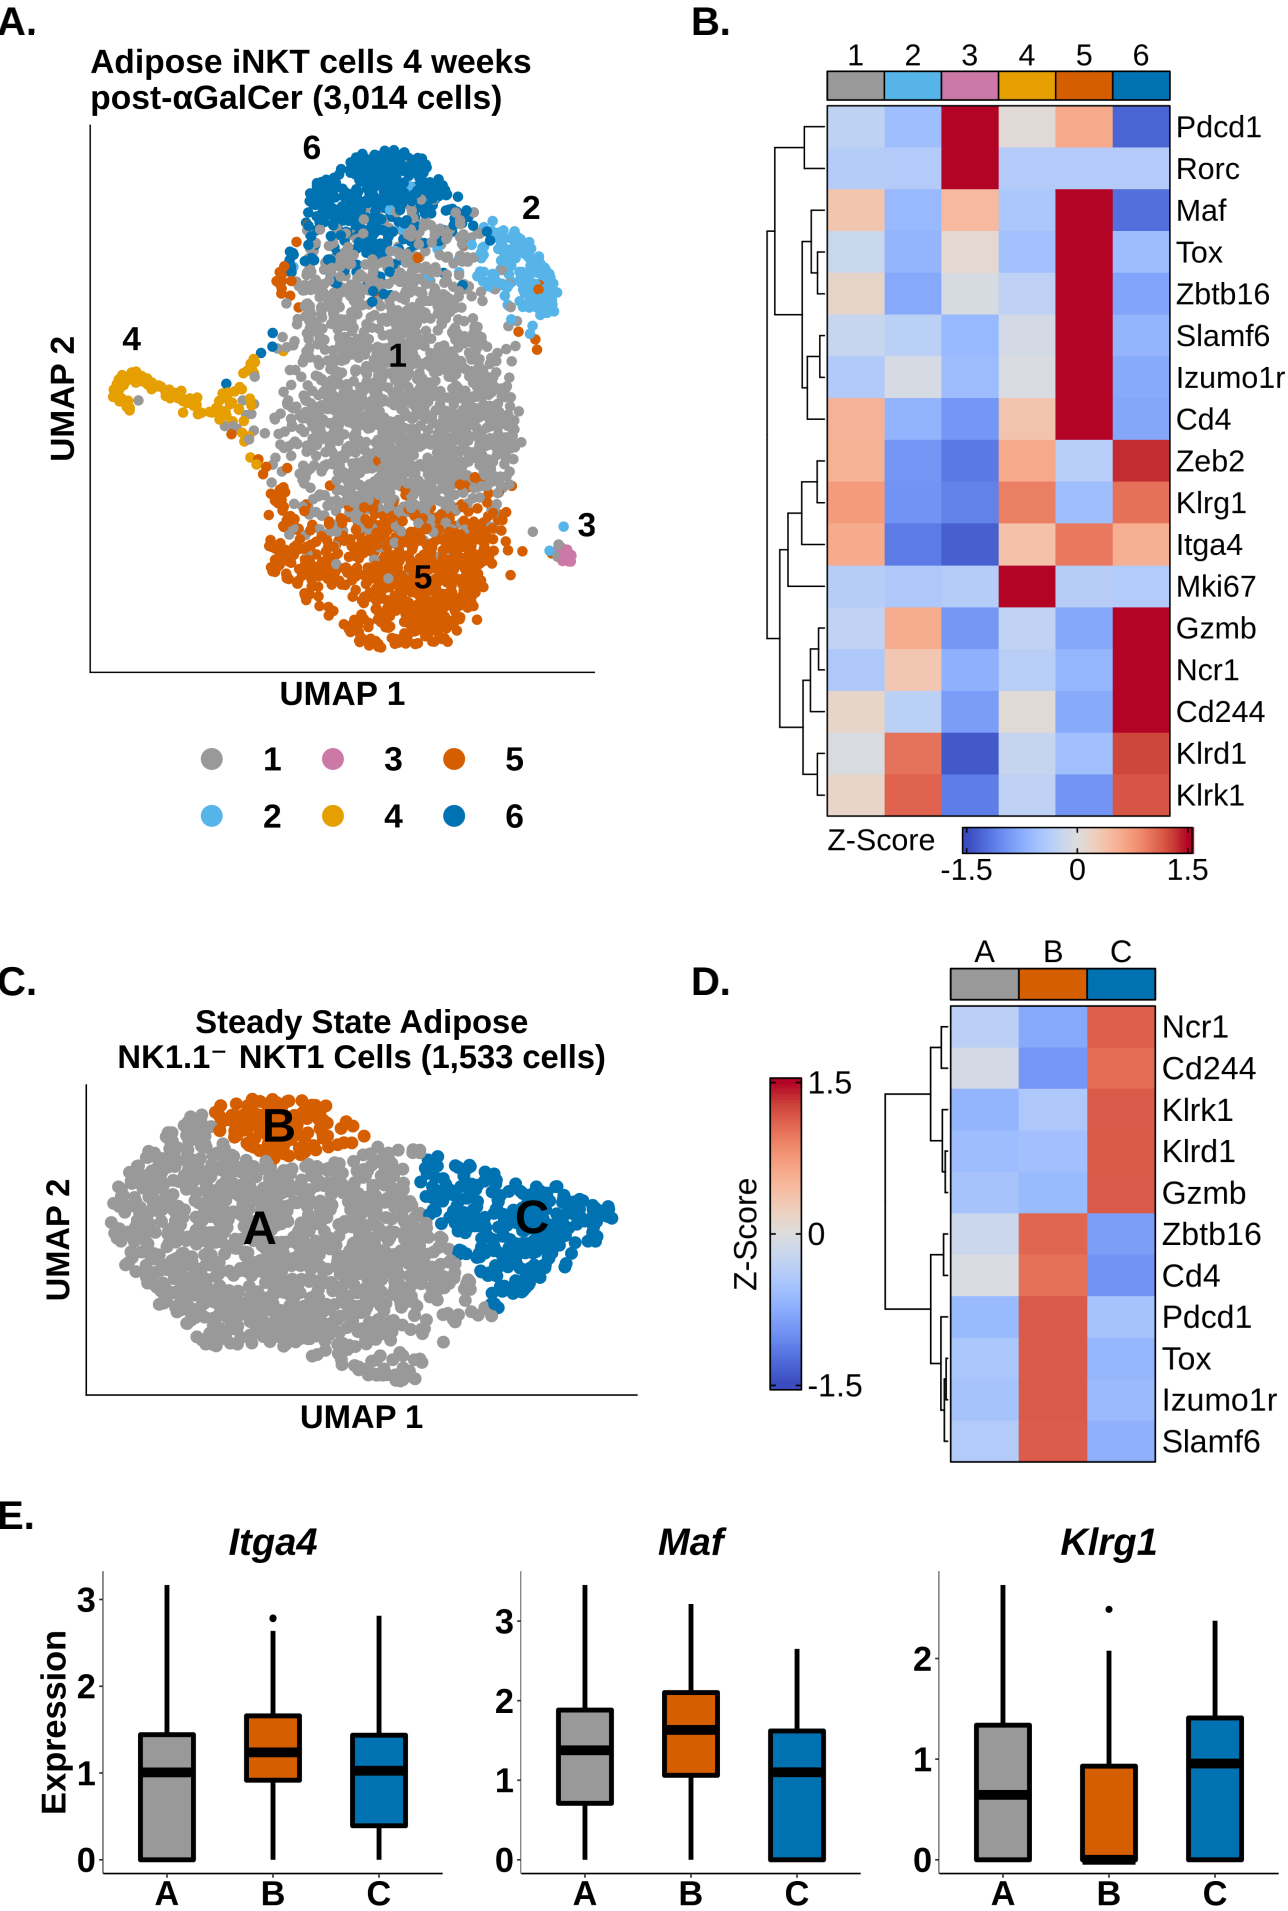

Supplement: supp [file elife-76586-supp-v1.zip]

Figure 6-figure supplement 4

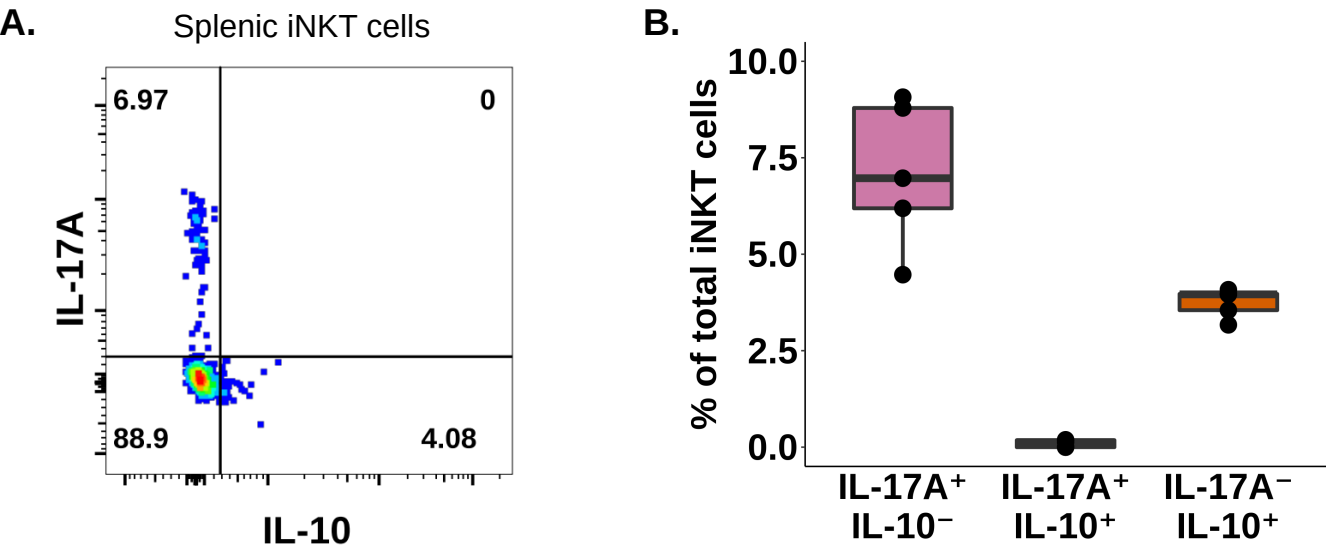

Supplement: supp [file elife-76586-supp-v1.zip]

Figure 1-figure supplement 3

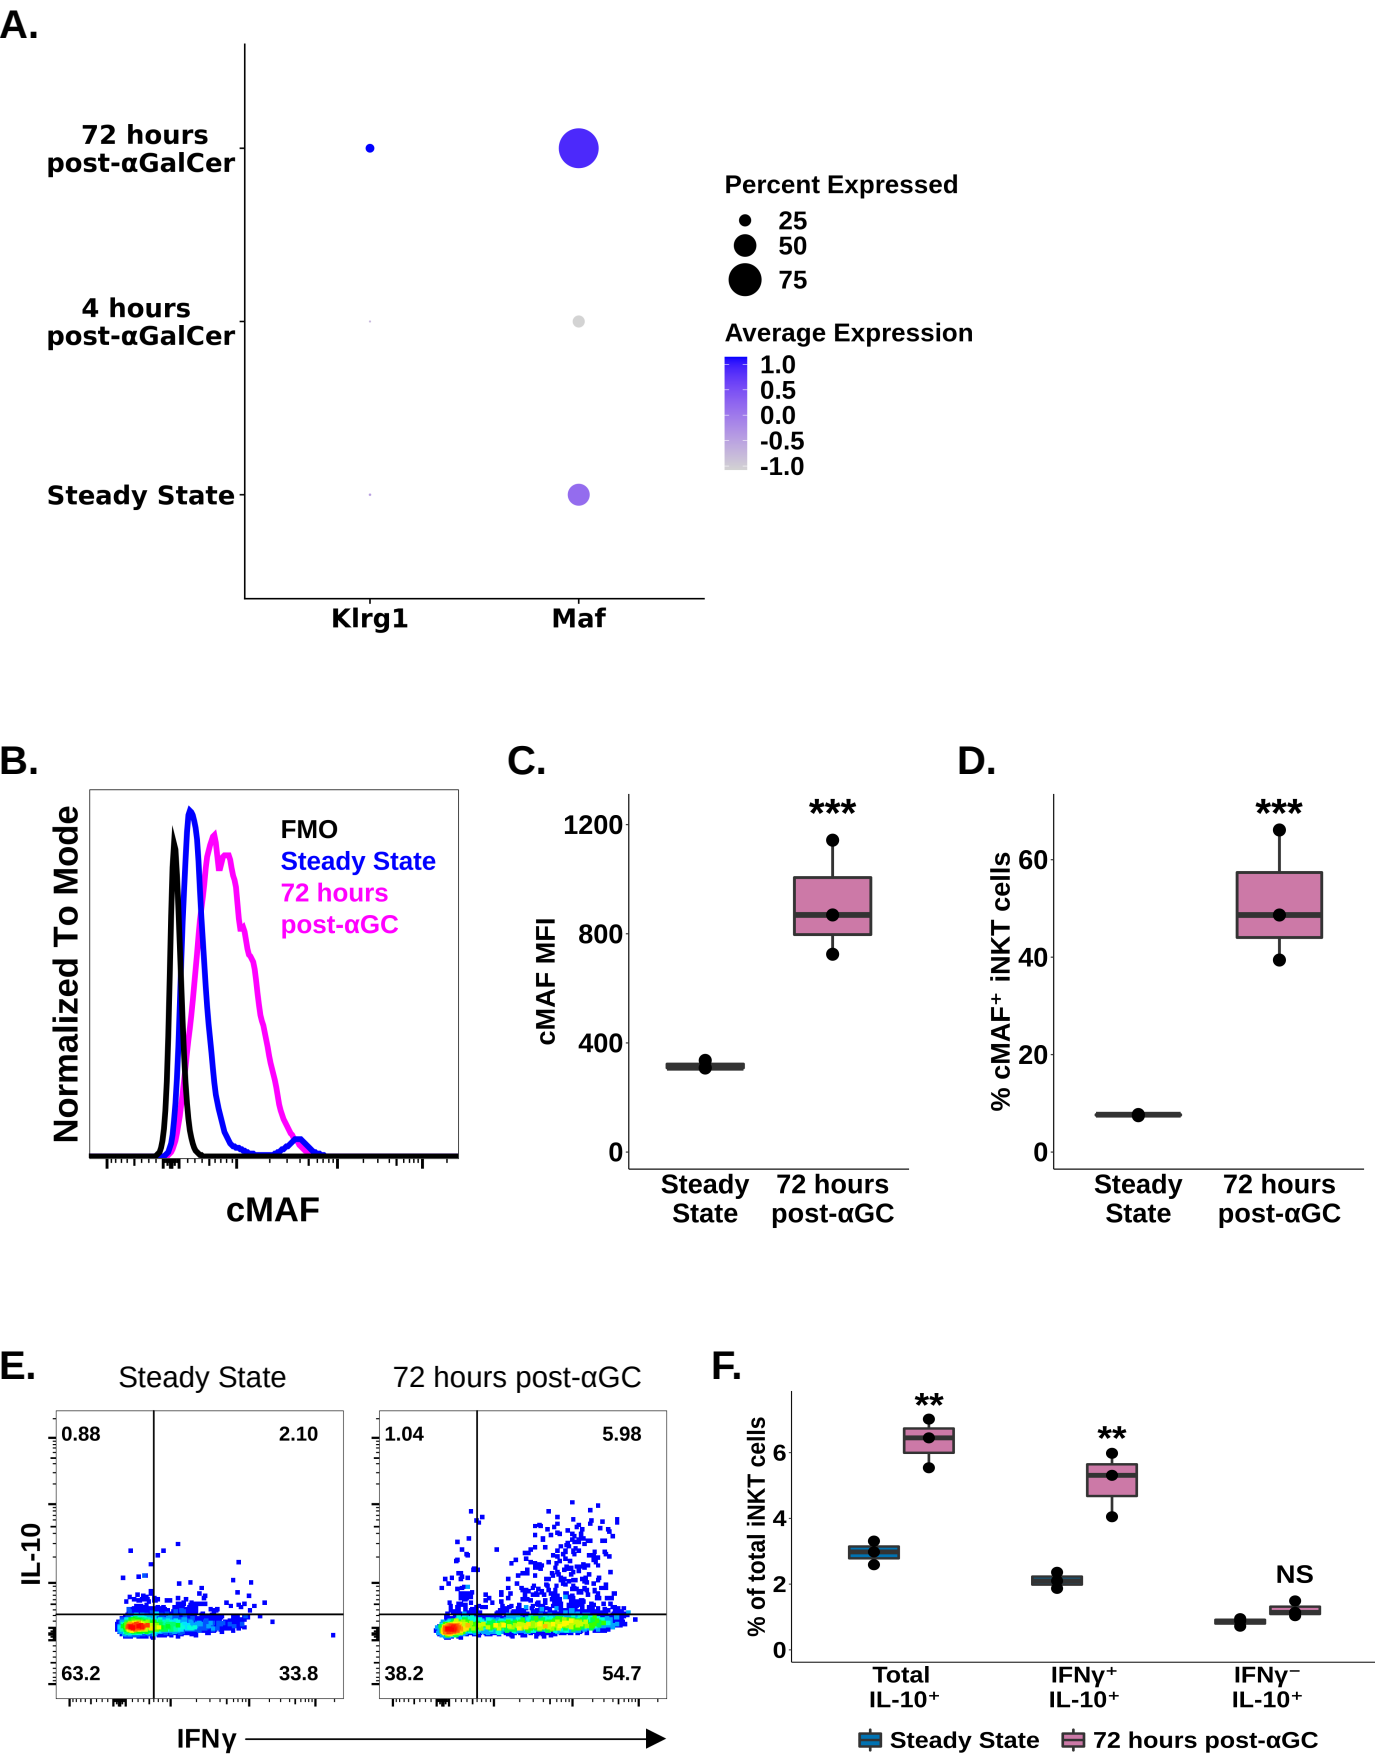

Supplement: supp [file elife-76586-supp-v1.zip]

Figure 5-figure supplement 1

A.

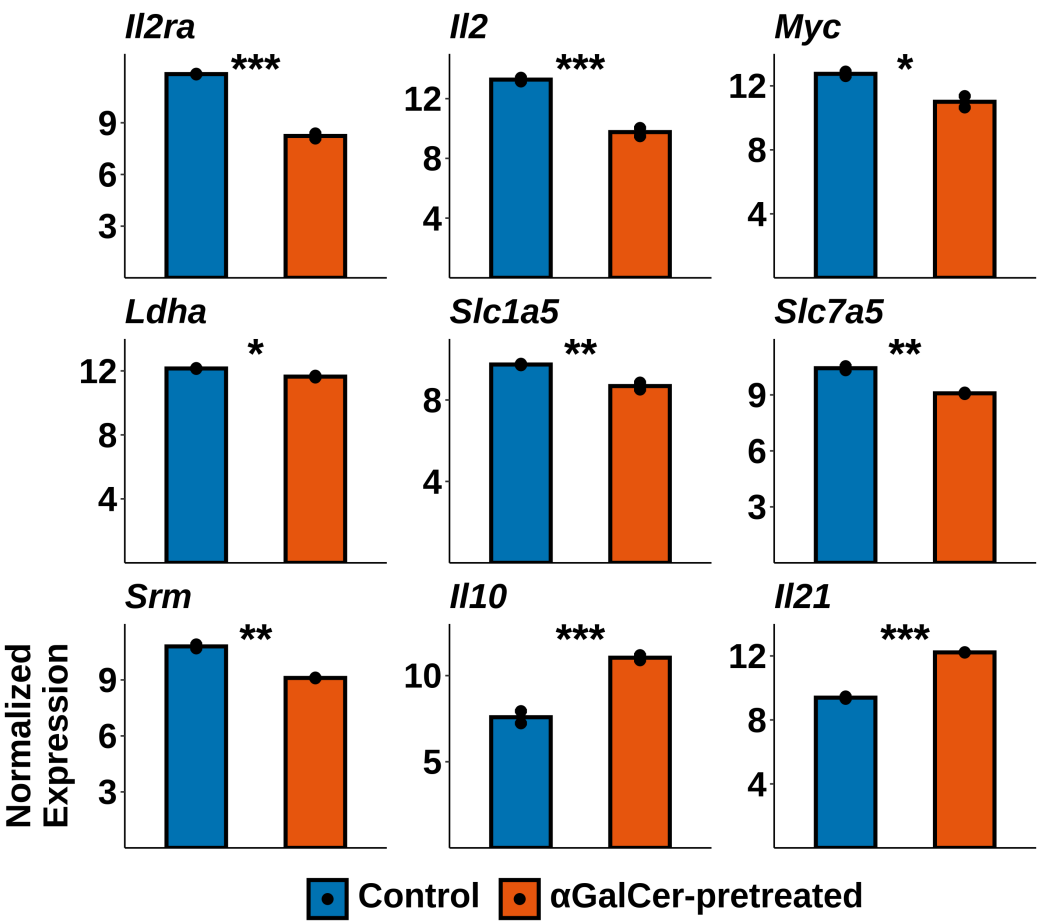

B.

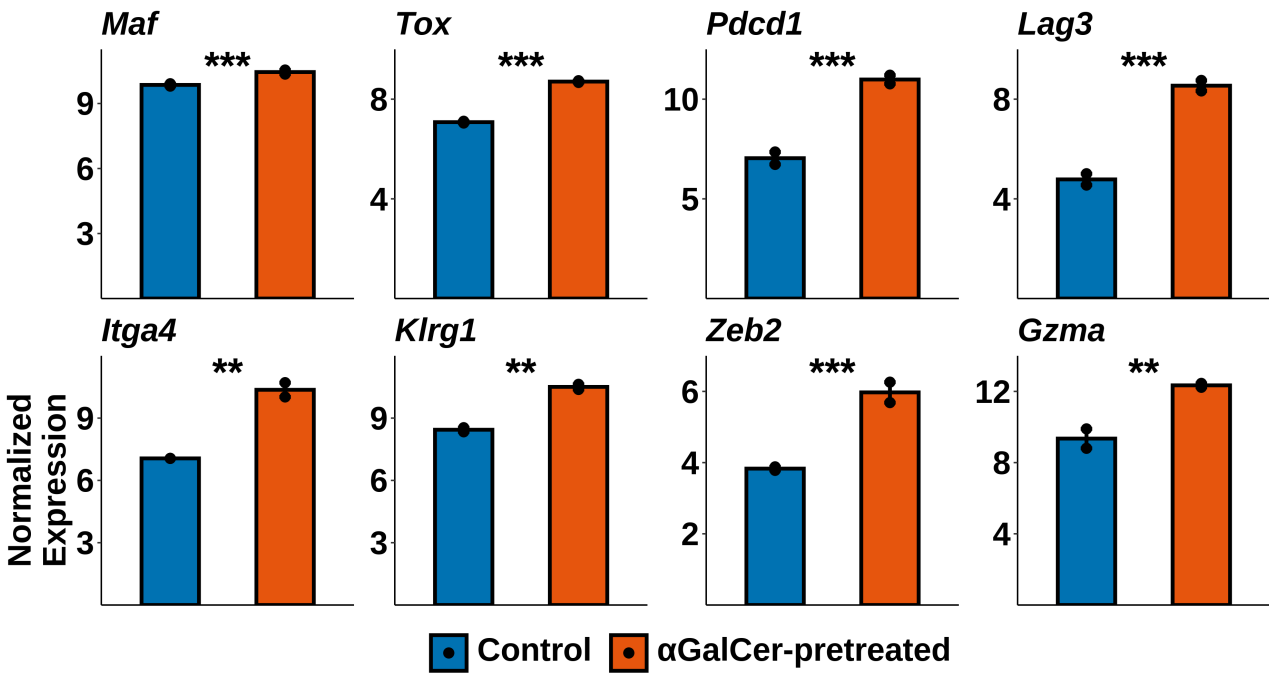

Supplement: supp [file elife-76586-supp-v1.zip]

Figure 5-figure supplement 4

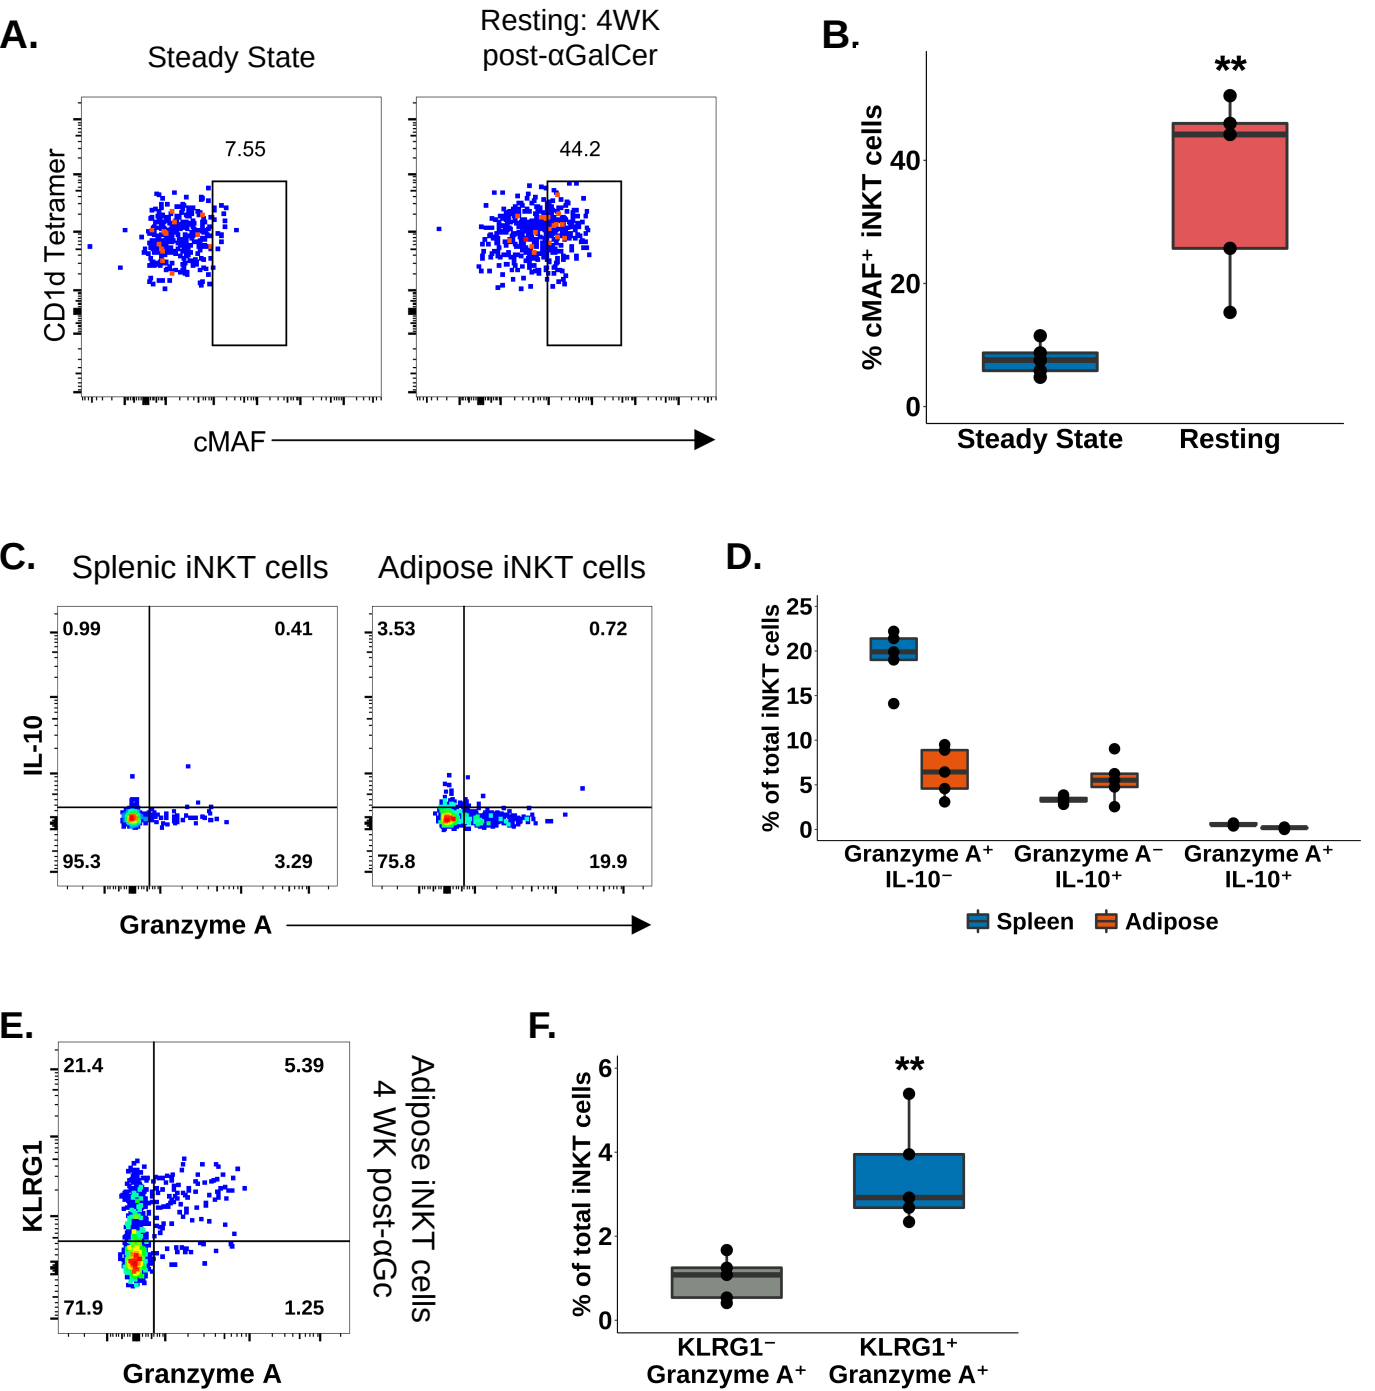

Supplement: supp [file elife-76586-supp-v1.zip]

Figure 2-figure supplement 3

A.

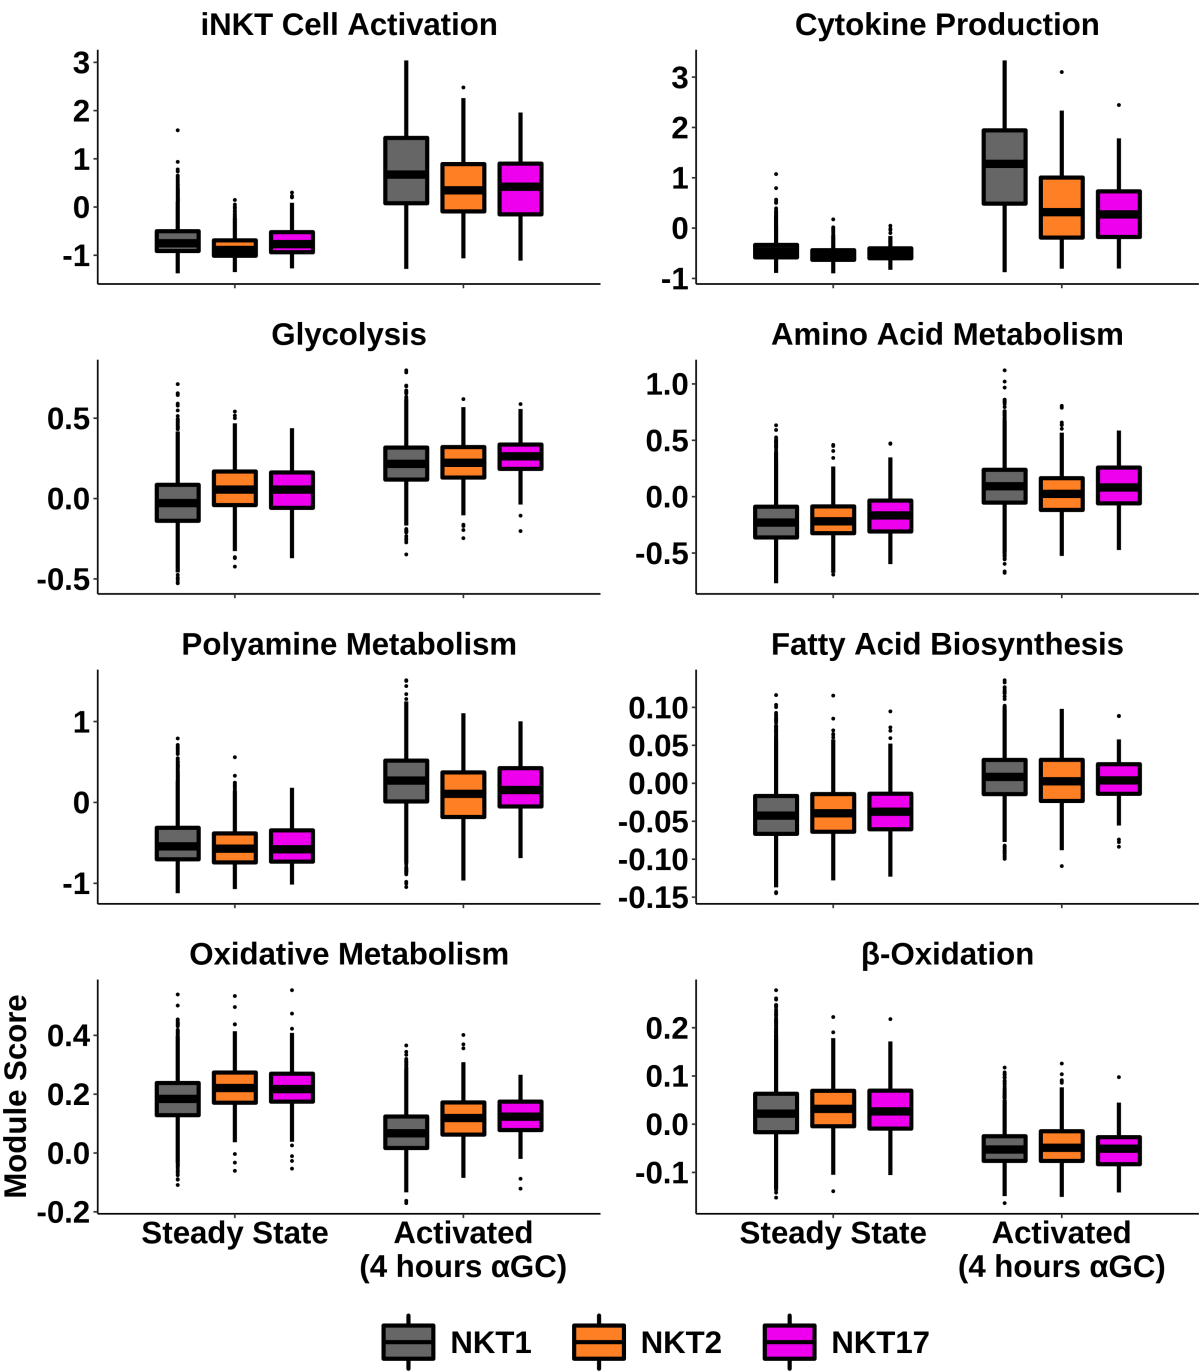

Supplement: supp [file elife-76586-supp-v1.zip]

Figure 5-figure supplement 3

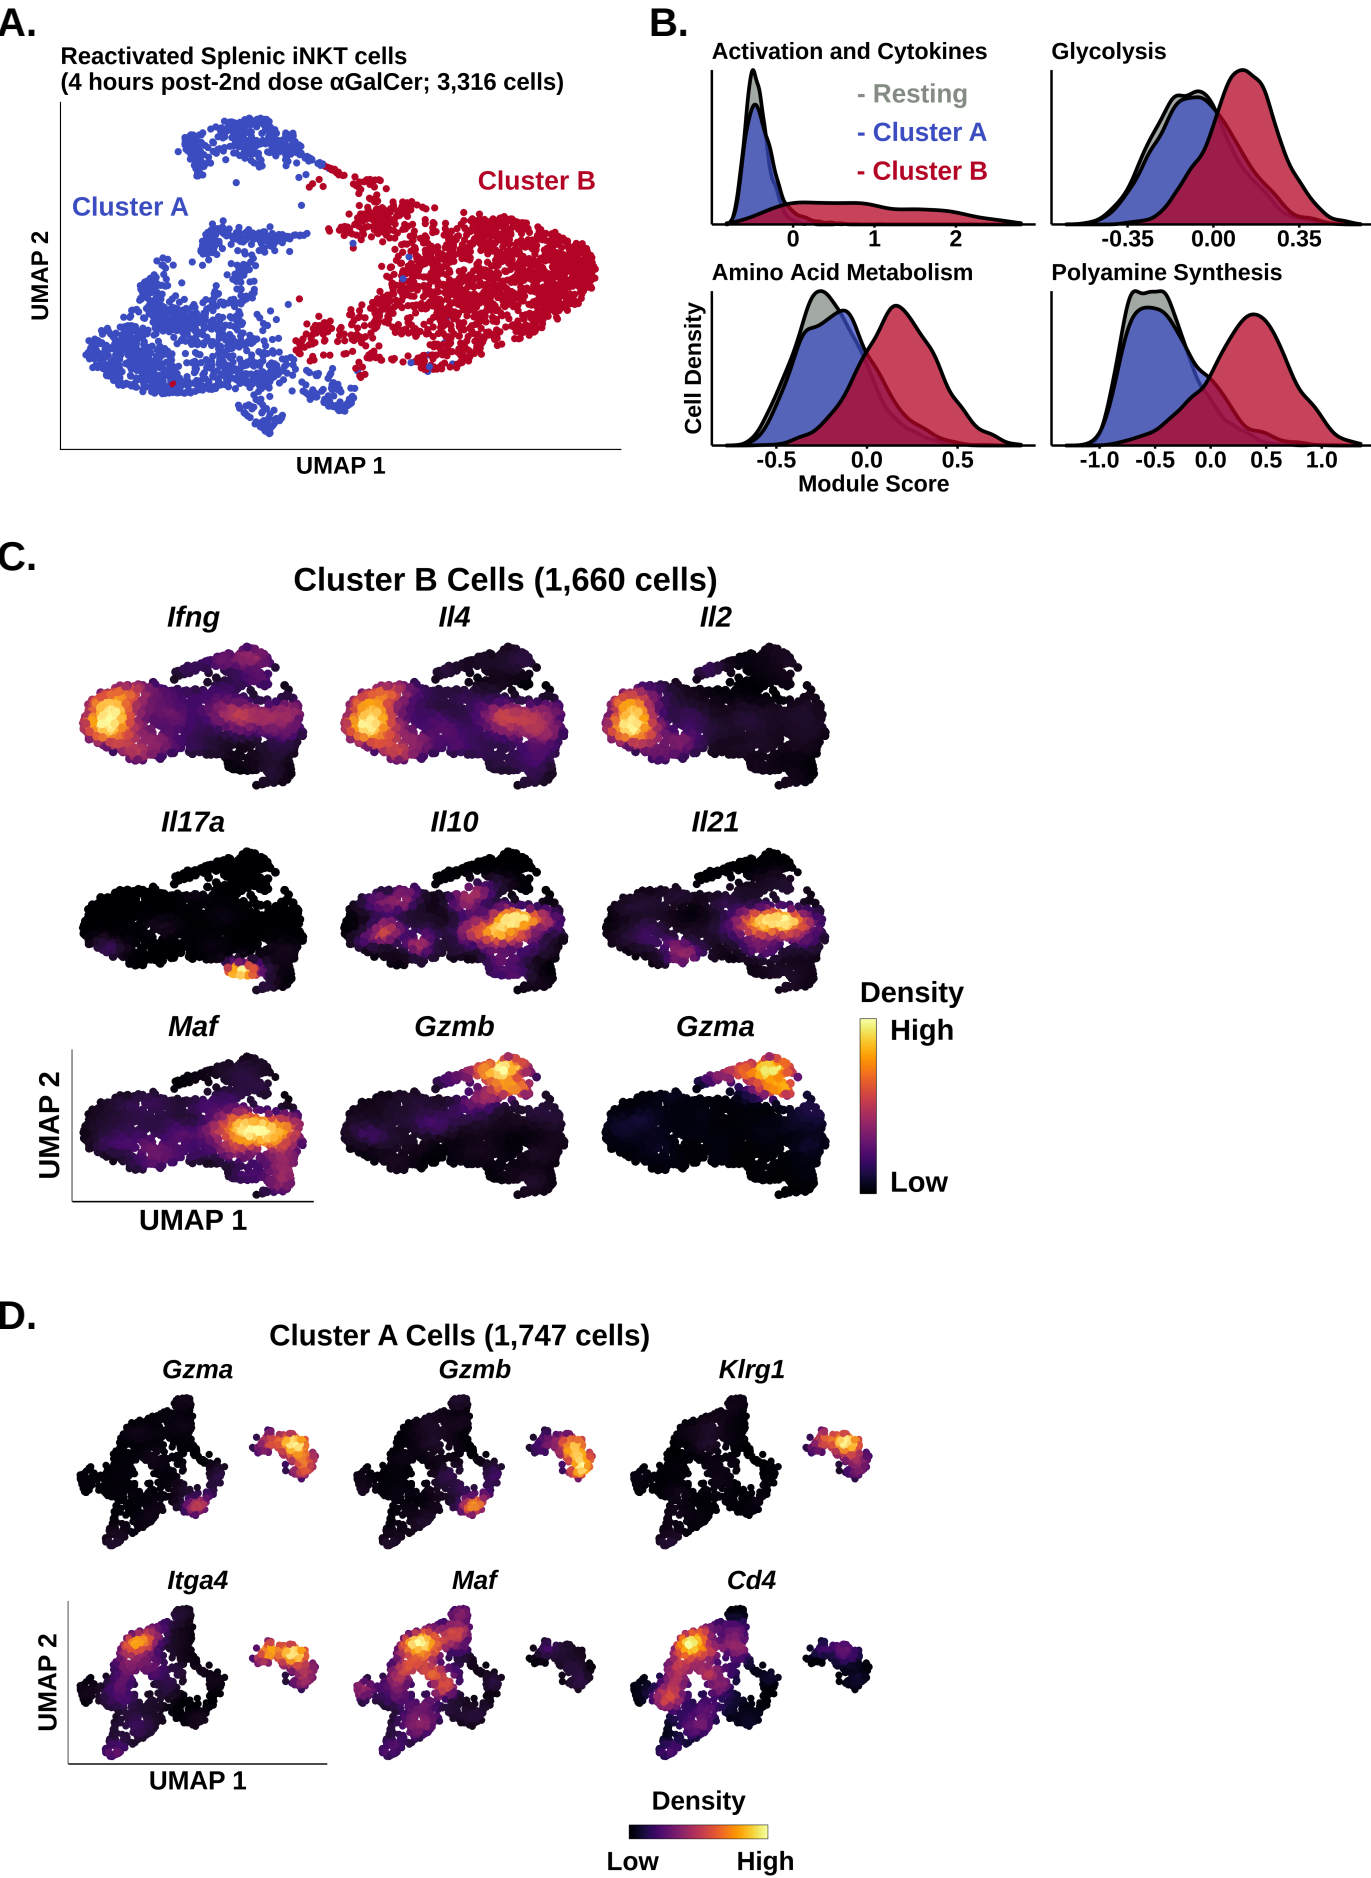

Supplement: supp [file elife-76586-supp-v1.zip]

Figure 5-figure supplement 2

A. Splenic iNKT cells (15,483 cells)

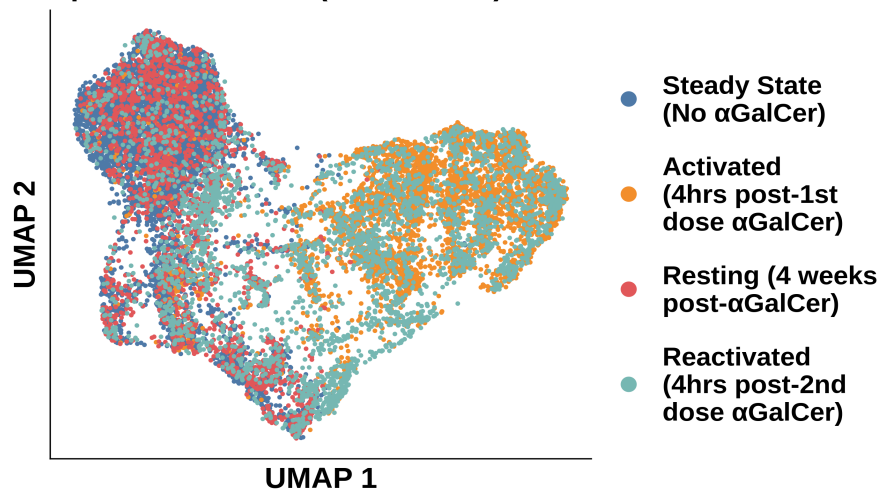

B.

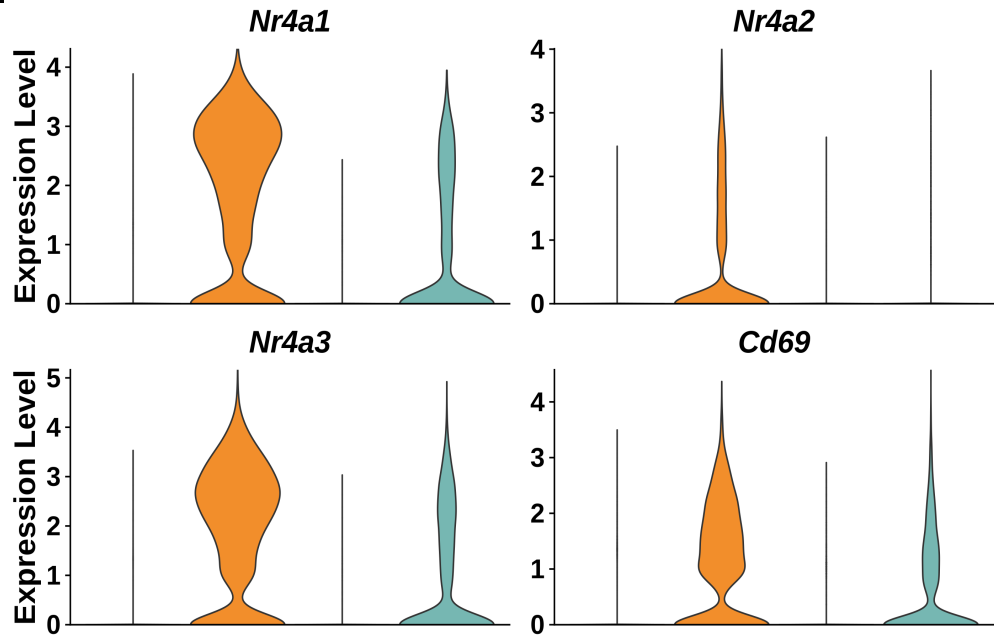

Supplement: supp [file elife-76586-supp-v1.zip]

Figure 1-figure supplement 1

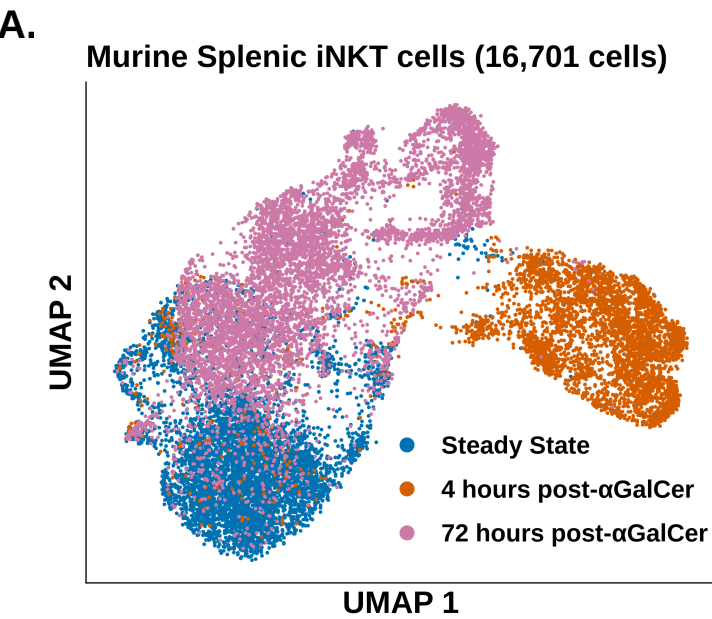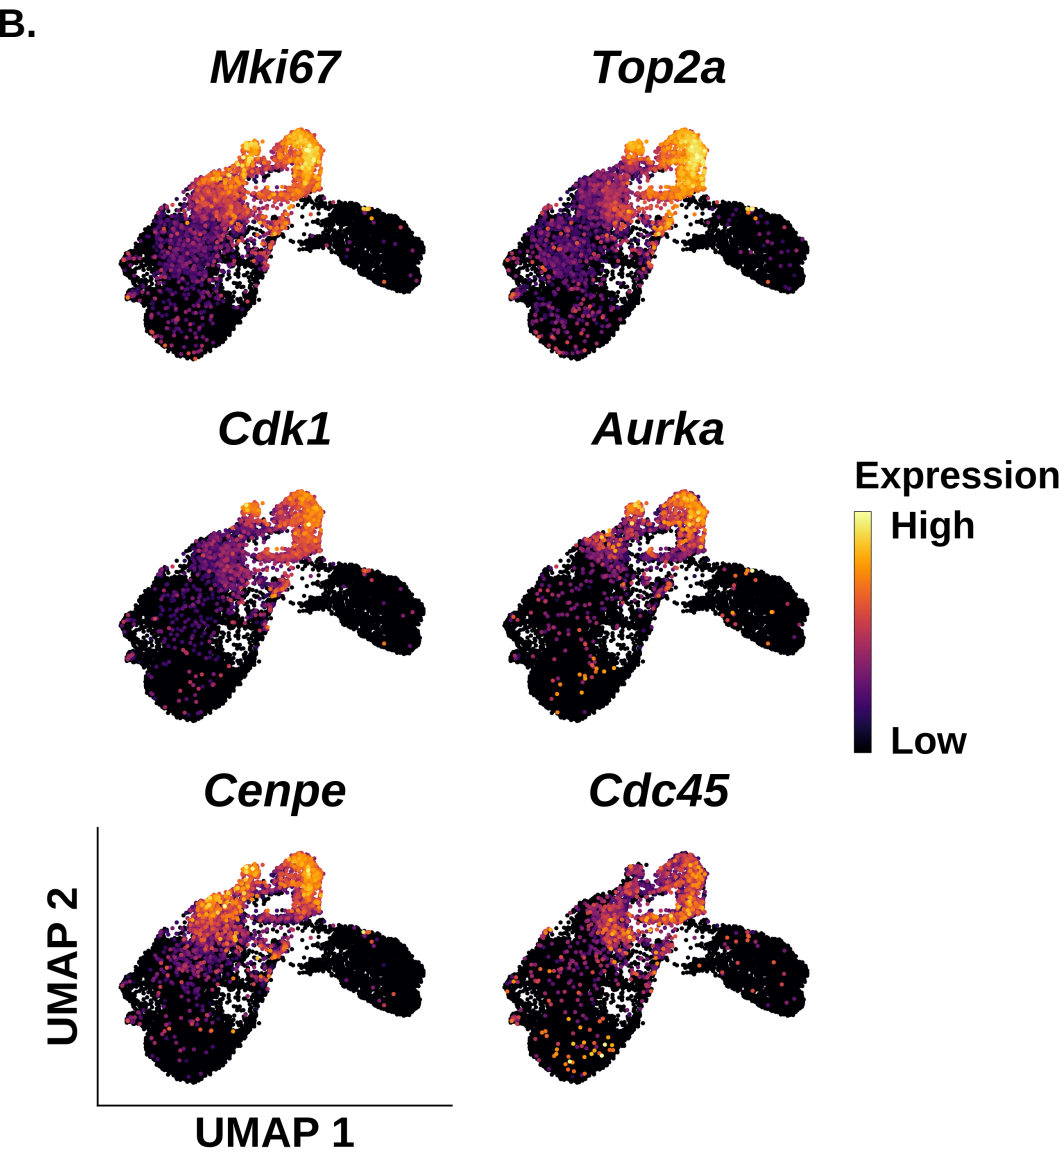

Supplement: supp [file elife-76586-supp-v1.zip]
